# Supplementary material
Source: MDPI journal article supplement (https://www.mdpi.com/1424-2818/13/7/300)

# **Brotogeris chiriri – Southern Andean Yungas – Bolivia**

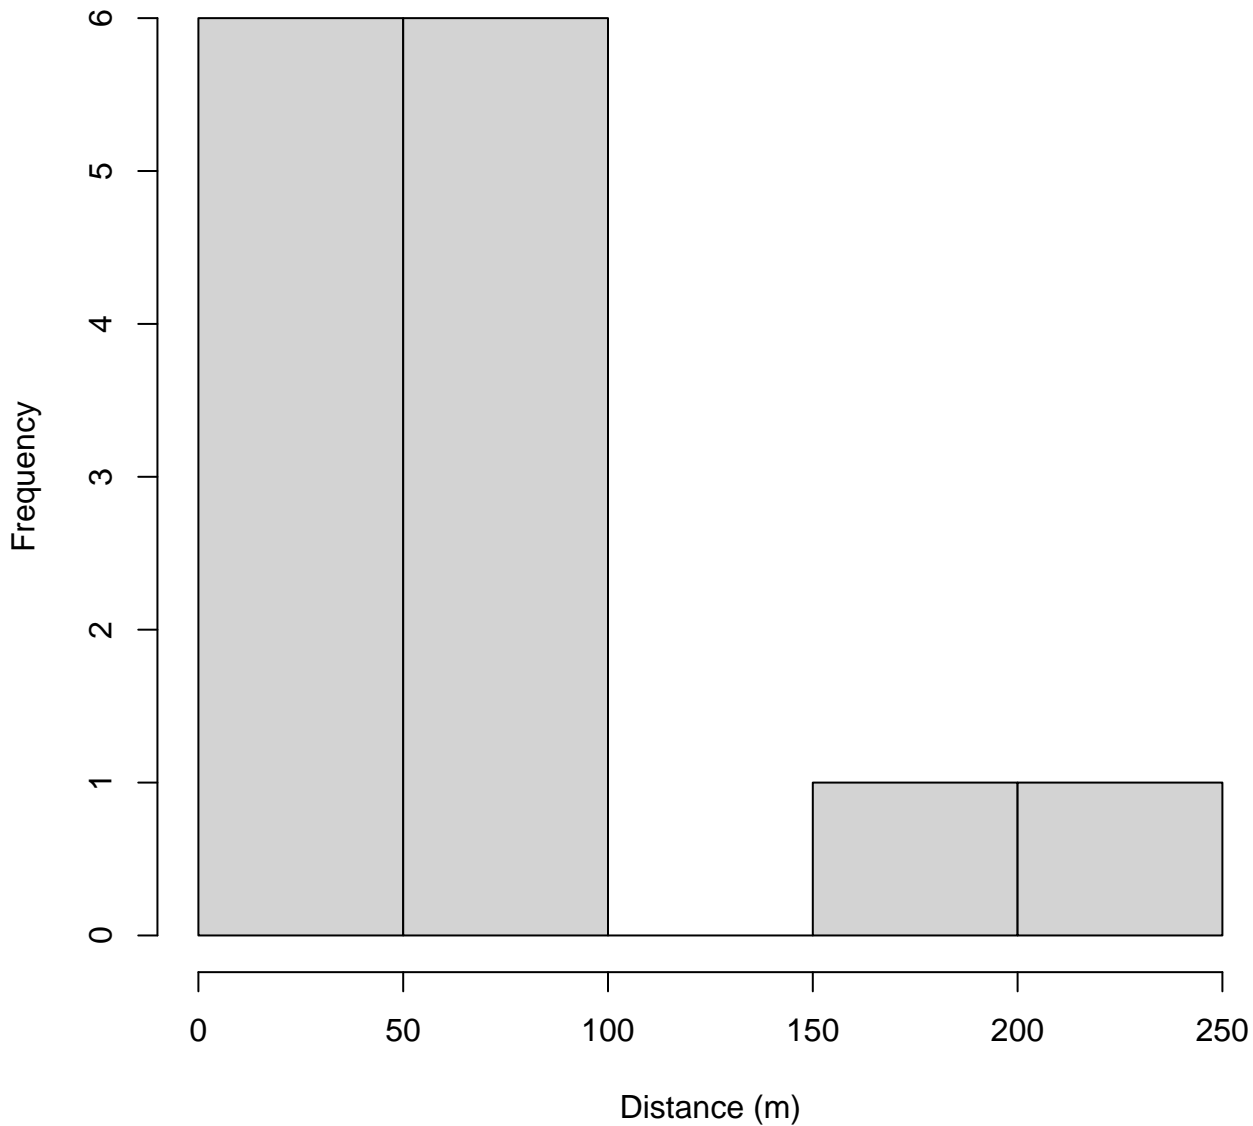

# Brotogeris chiriri – Southern Andean Yungas – Bolivia

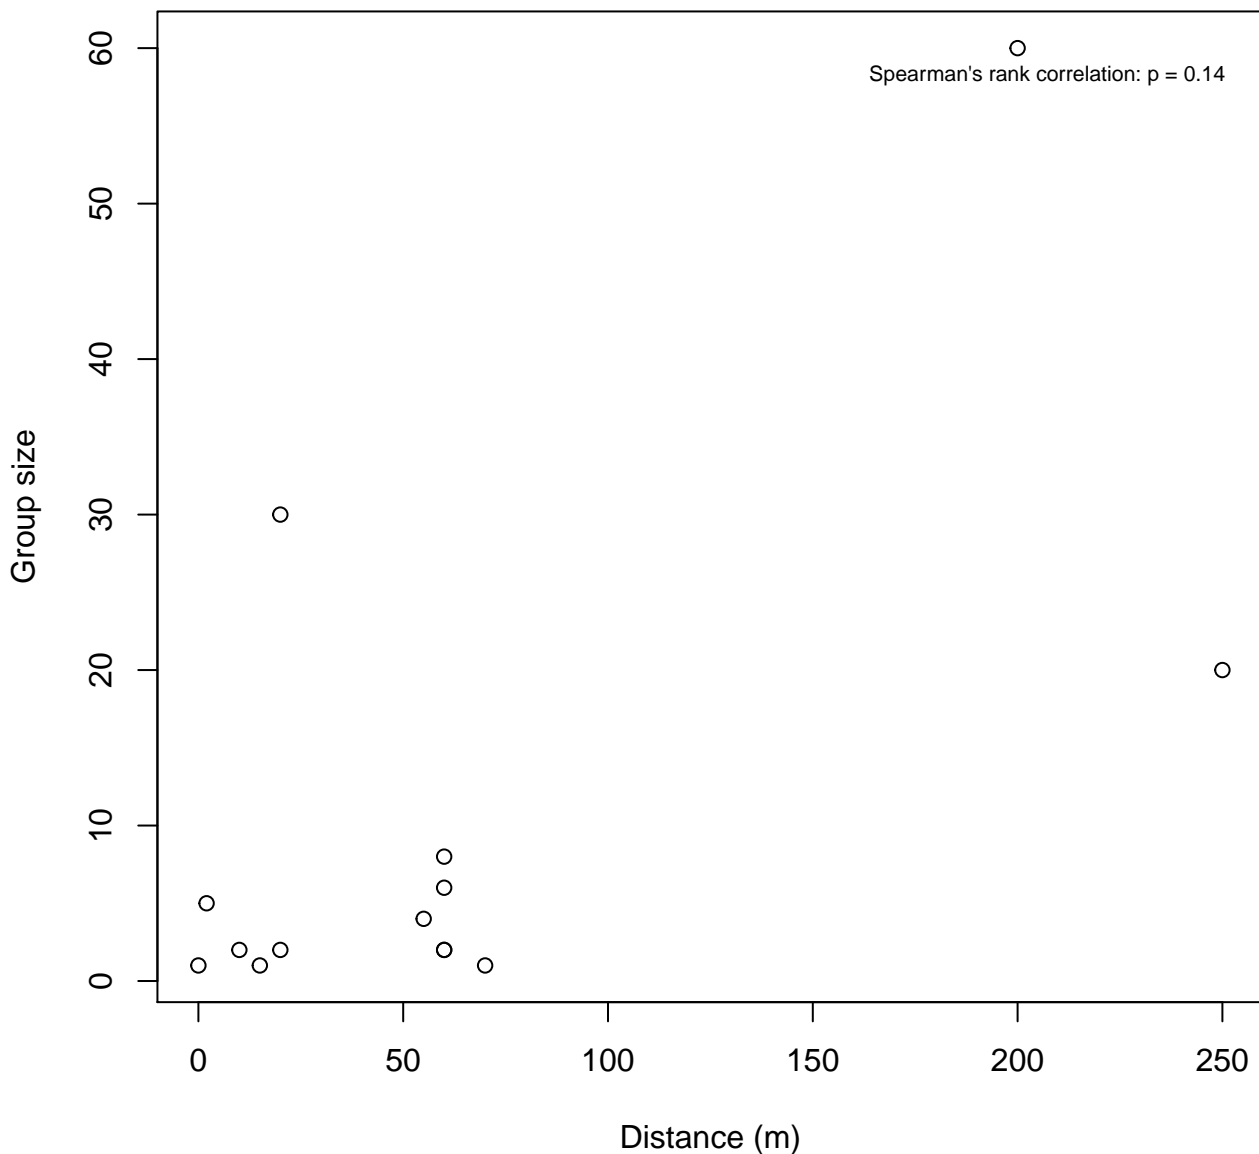

Brotogeris chiriri – Southern Andean Yungas – Bolivia (N = 14, key function = hr)

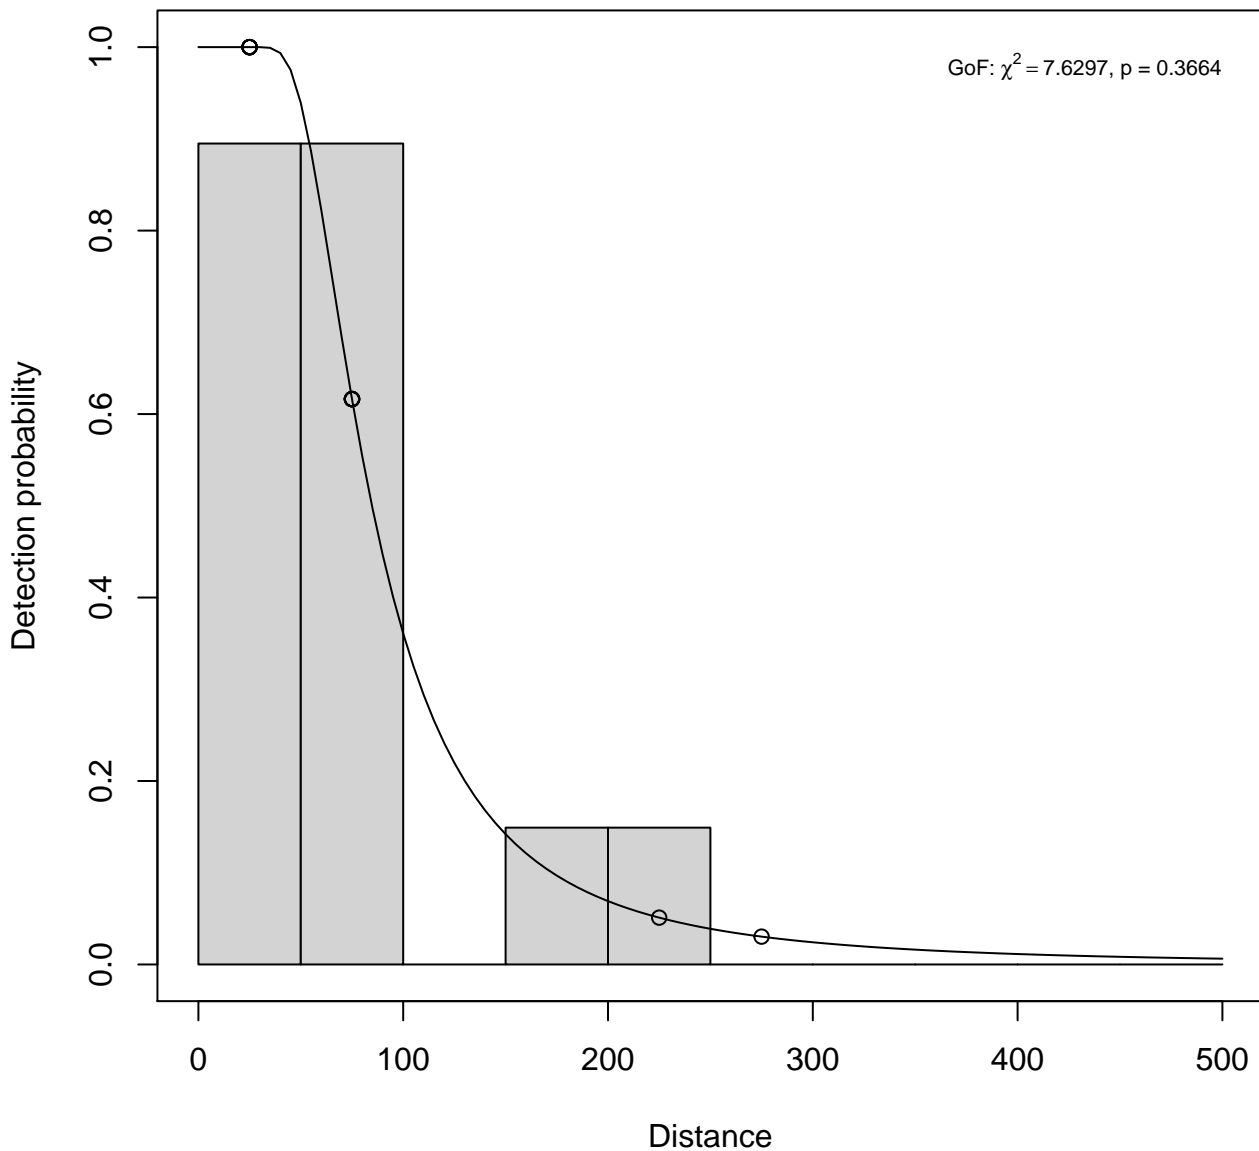

Brotogeris chiriri – Southern Andean Yungas – Bolivia (N = 14, key function = hr)

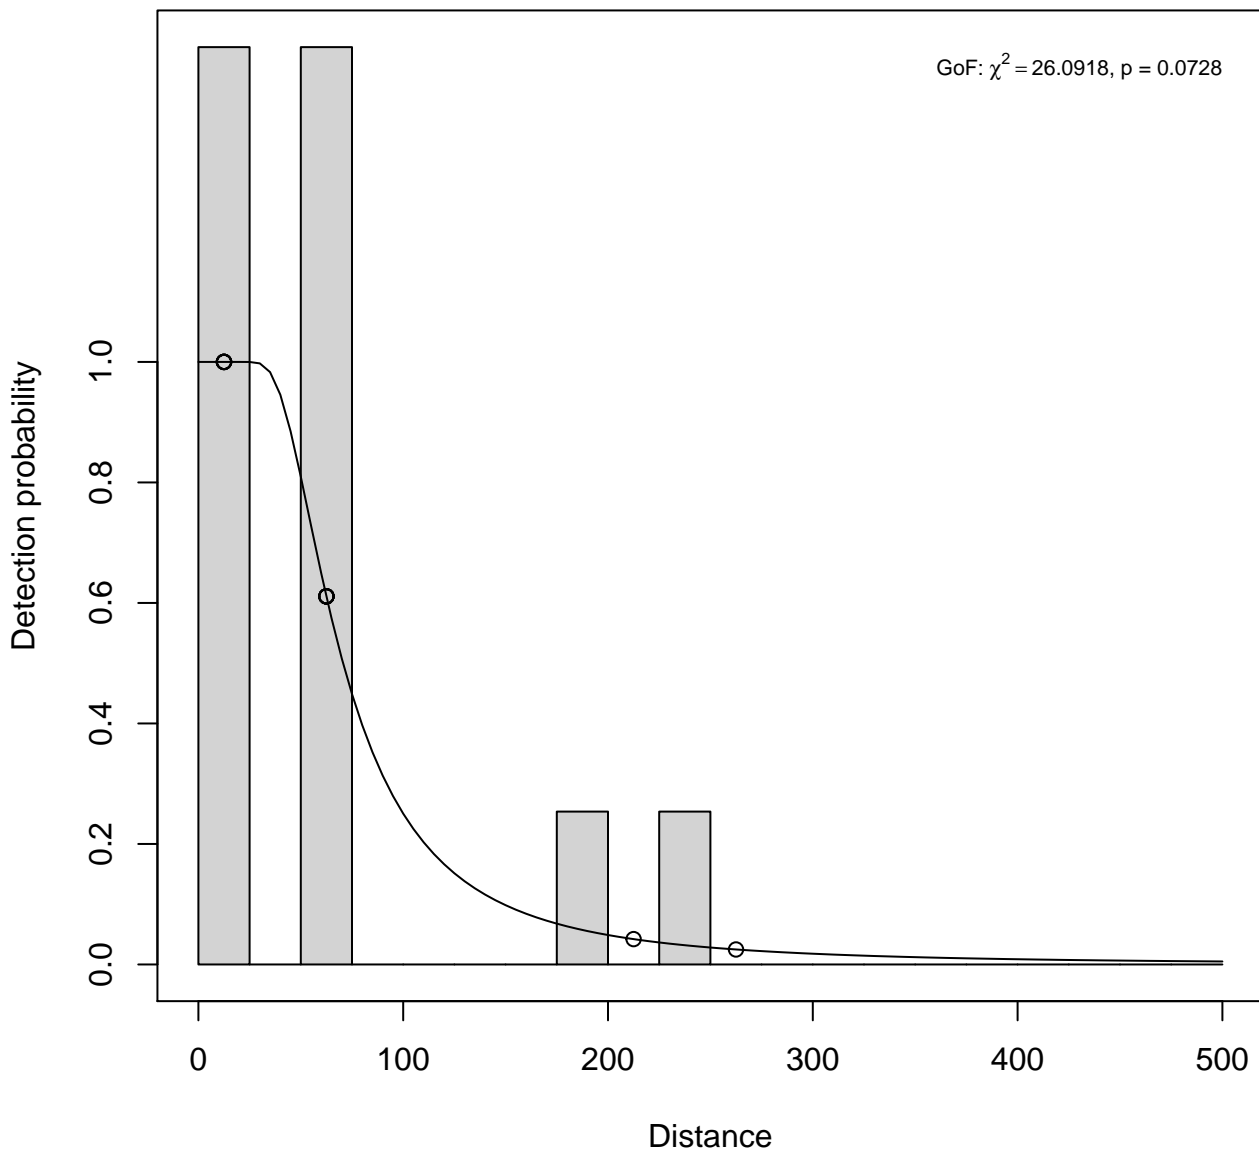

Brotogeris chiriri – Southern Andean Yungas – Bolivia (N = 14, key function = hr)

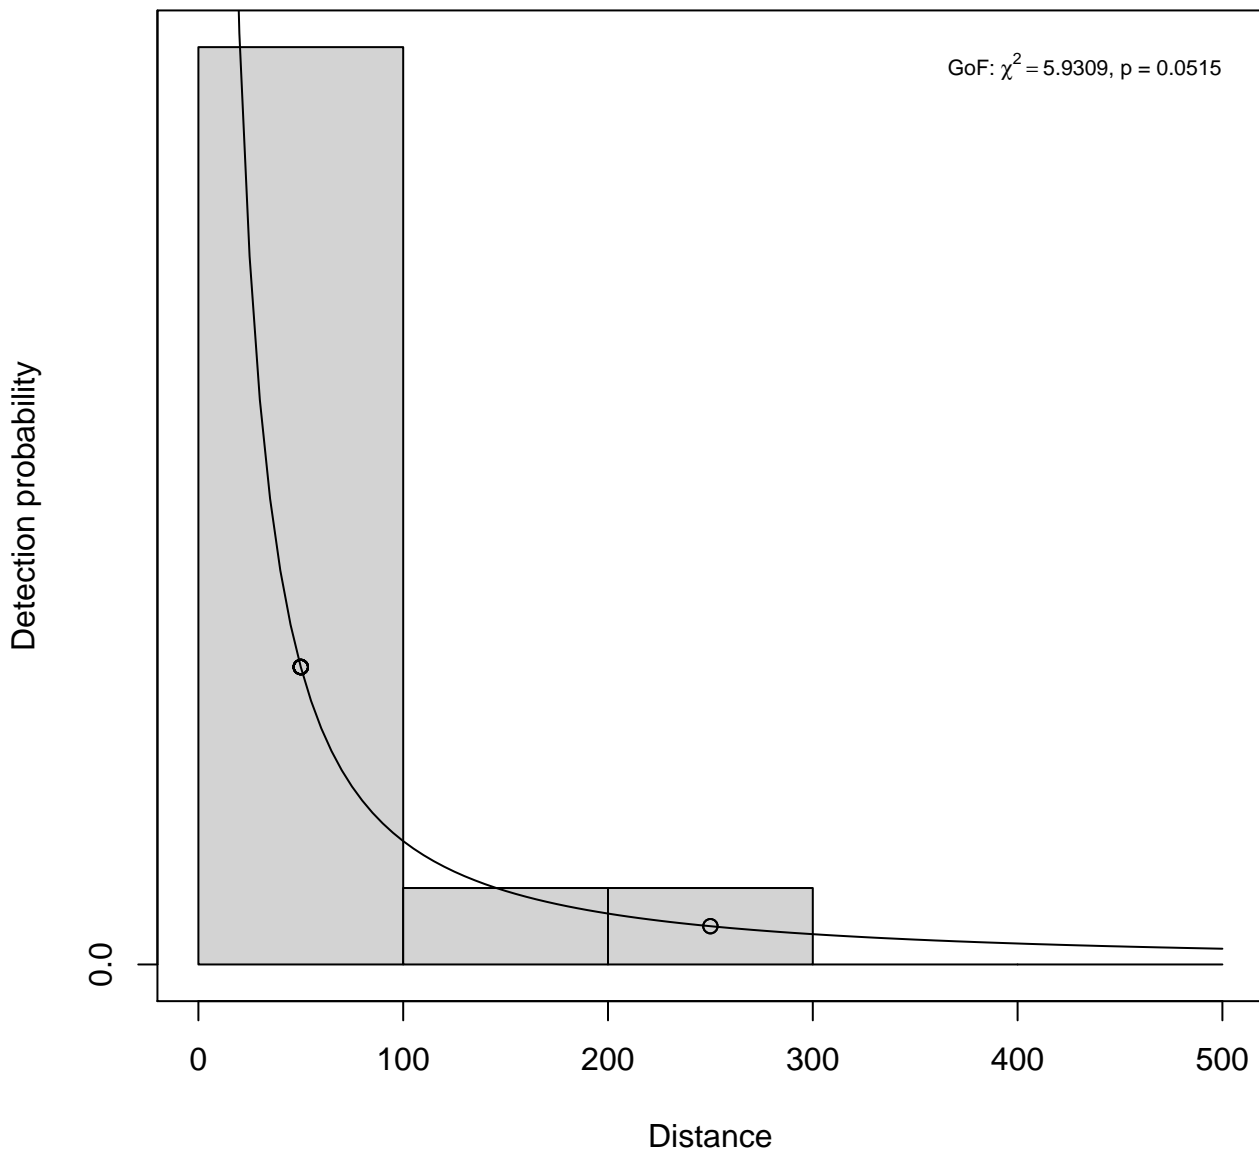

Supplement: s1 [file s1]
