# Supplementary material
Source: MDPI journal article supplement (https://www.mdpi.com/1424-2818/13/7/300)

# **Ara severus – Beni savanna – Bolivia**

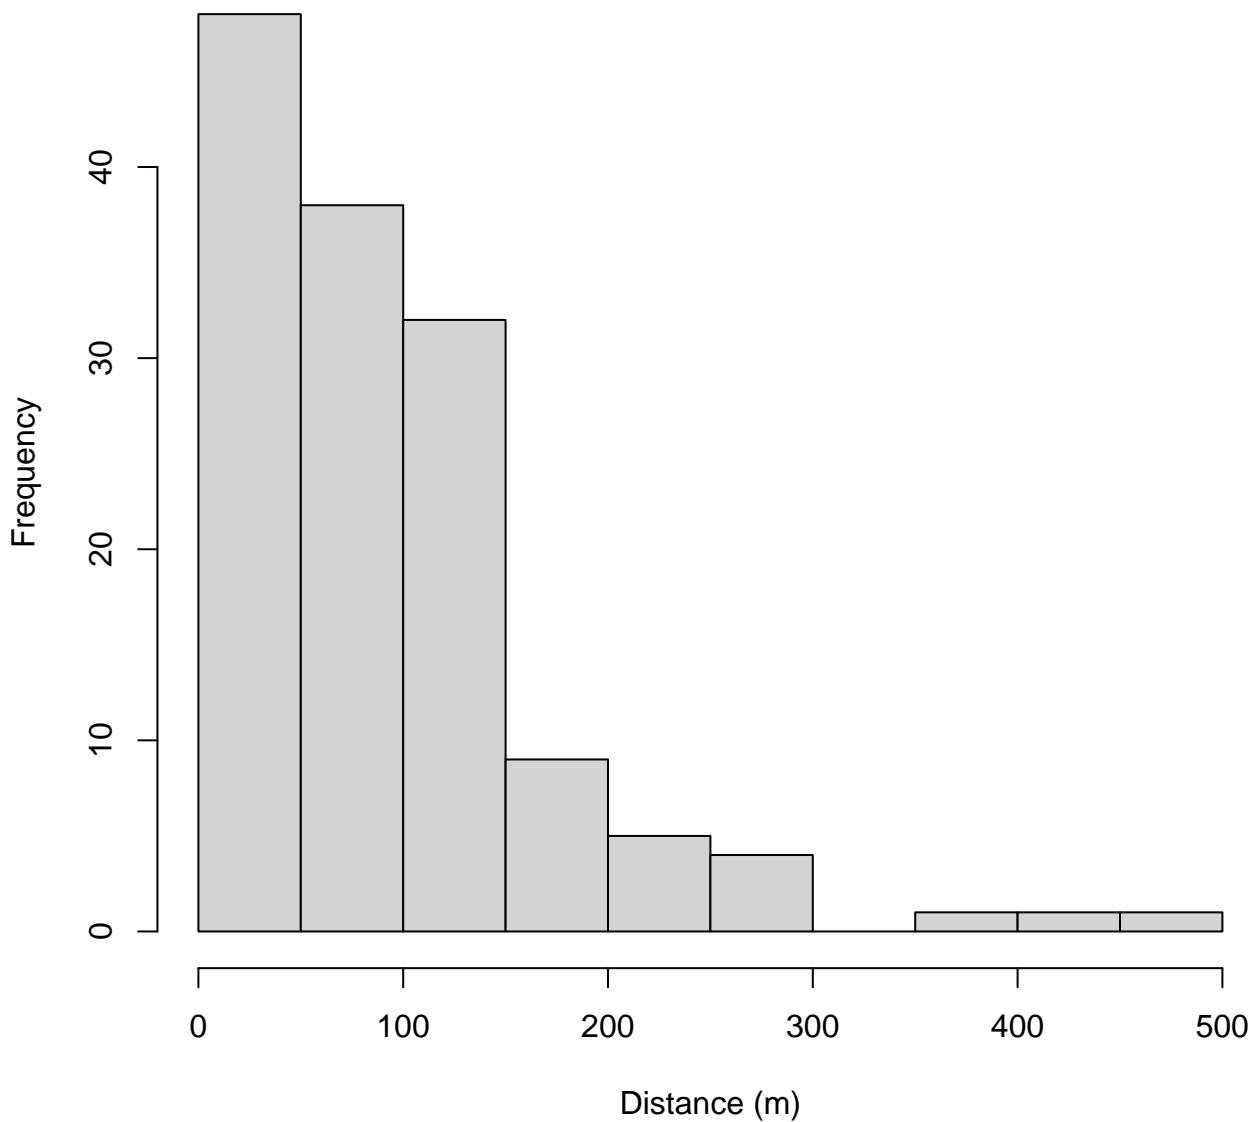

# **Ara severus – Beni savanna – Bolivia**

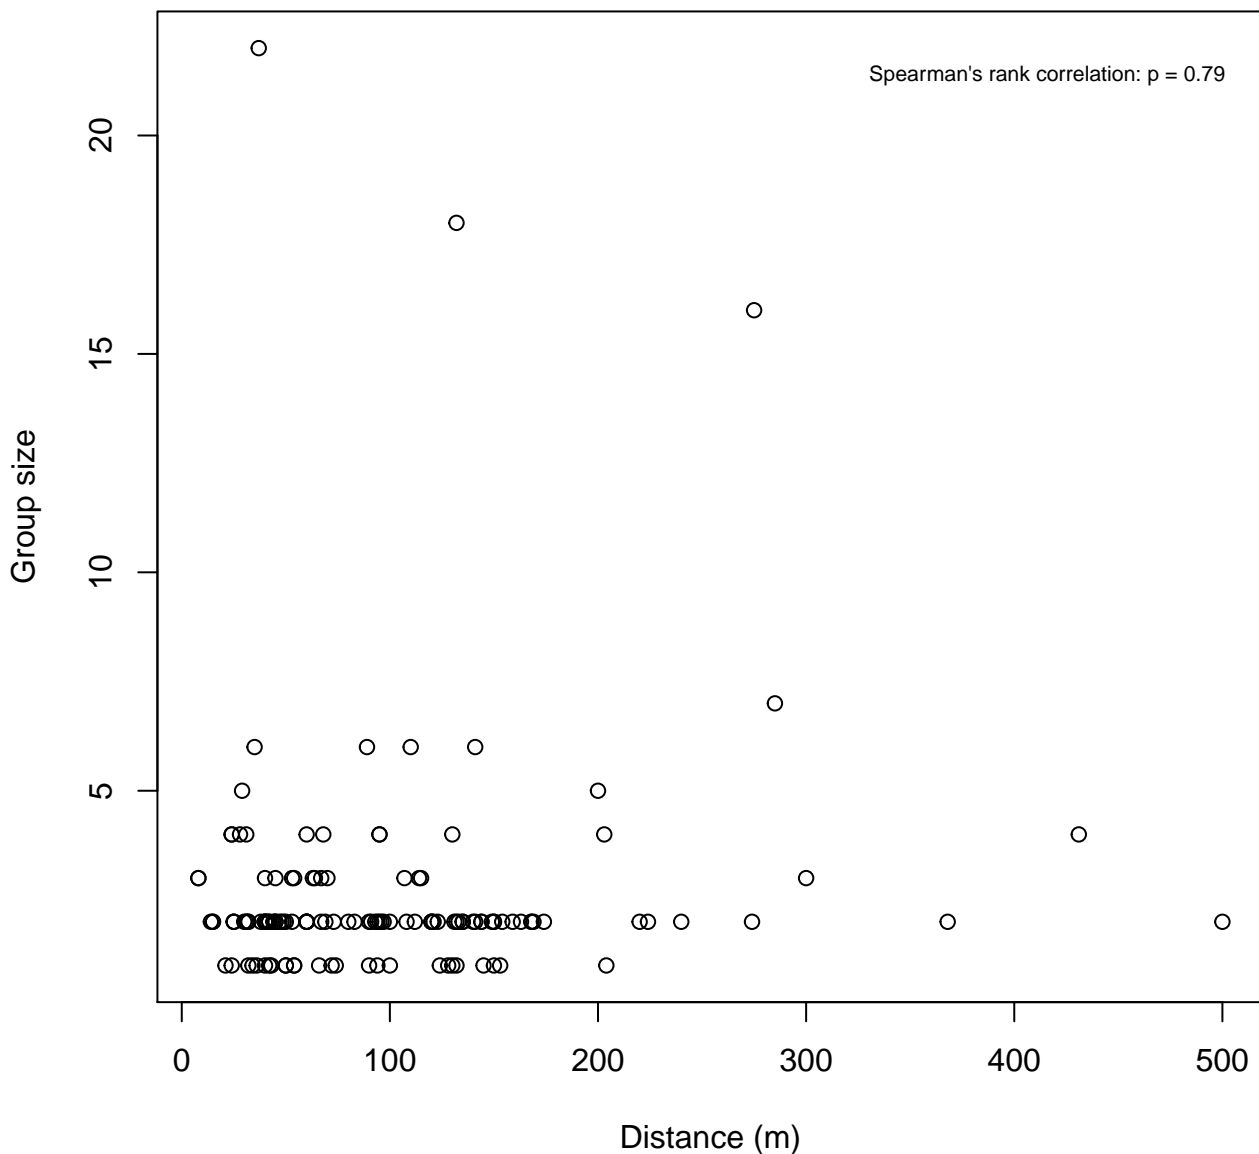

Ara severus – Beni savanna – Bolivia (N = 139, key function = hr)

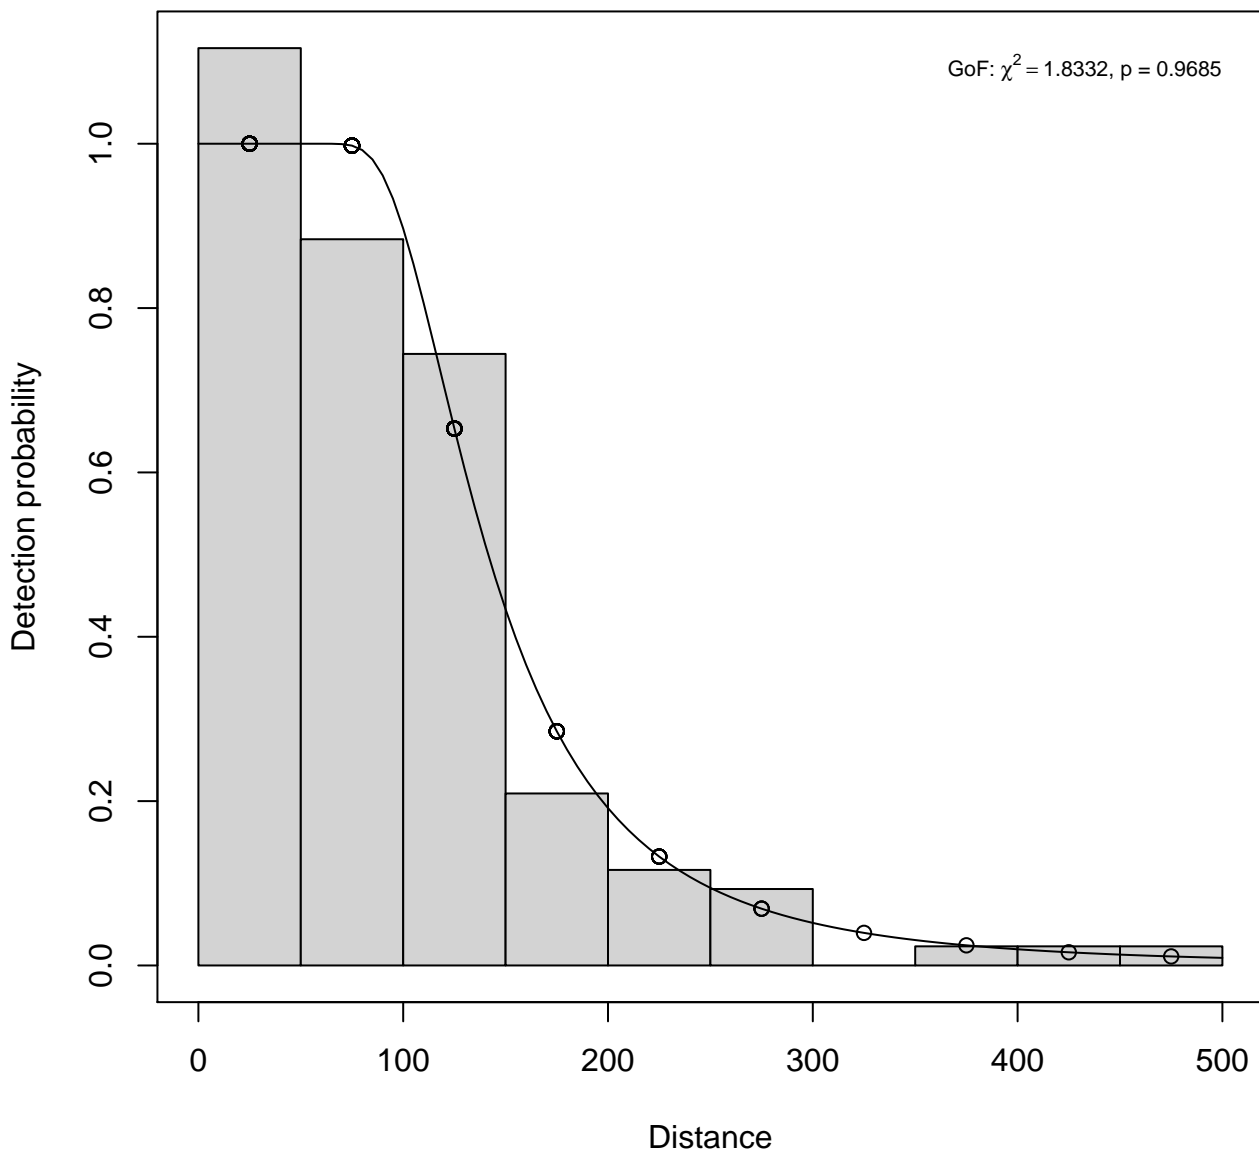

Ara severus – Beni savanna – Bolivia (N = 139, key function = hr)

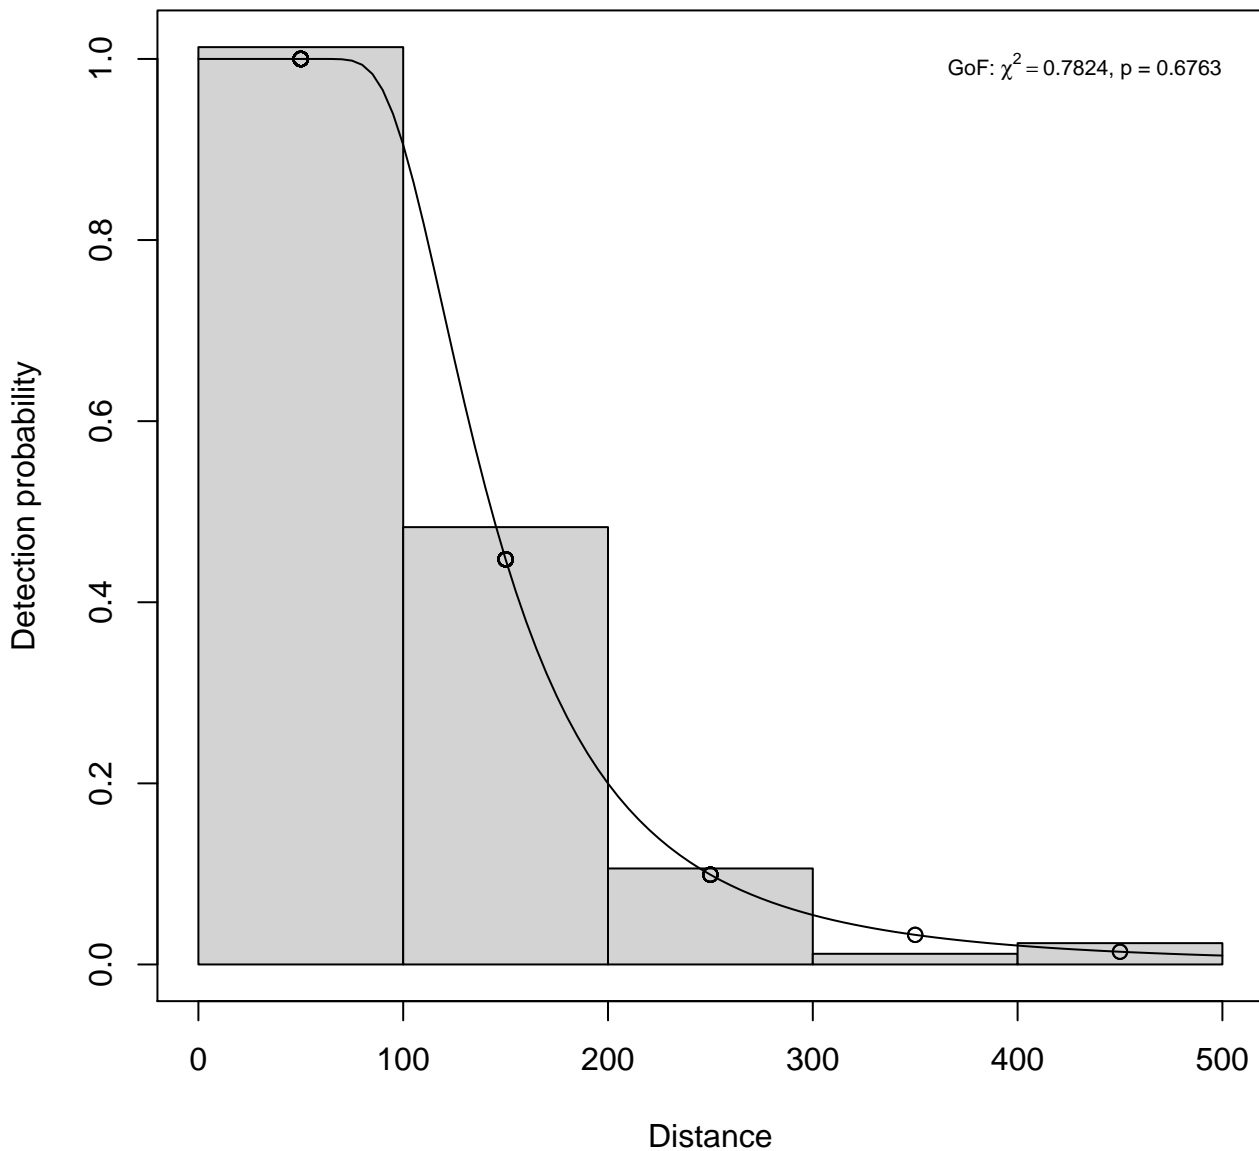

Ara severus – Beni savanna – Bolivia (N = 139, key function = hr)

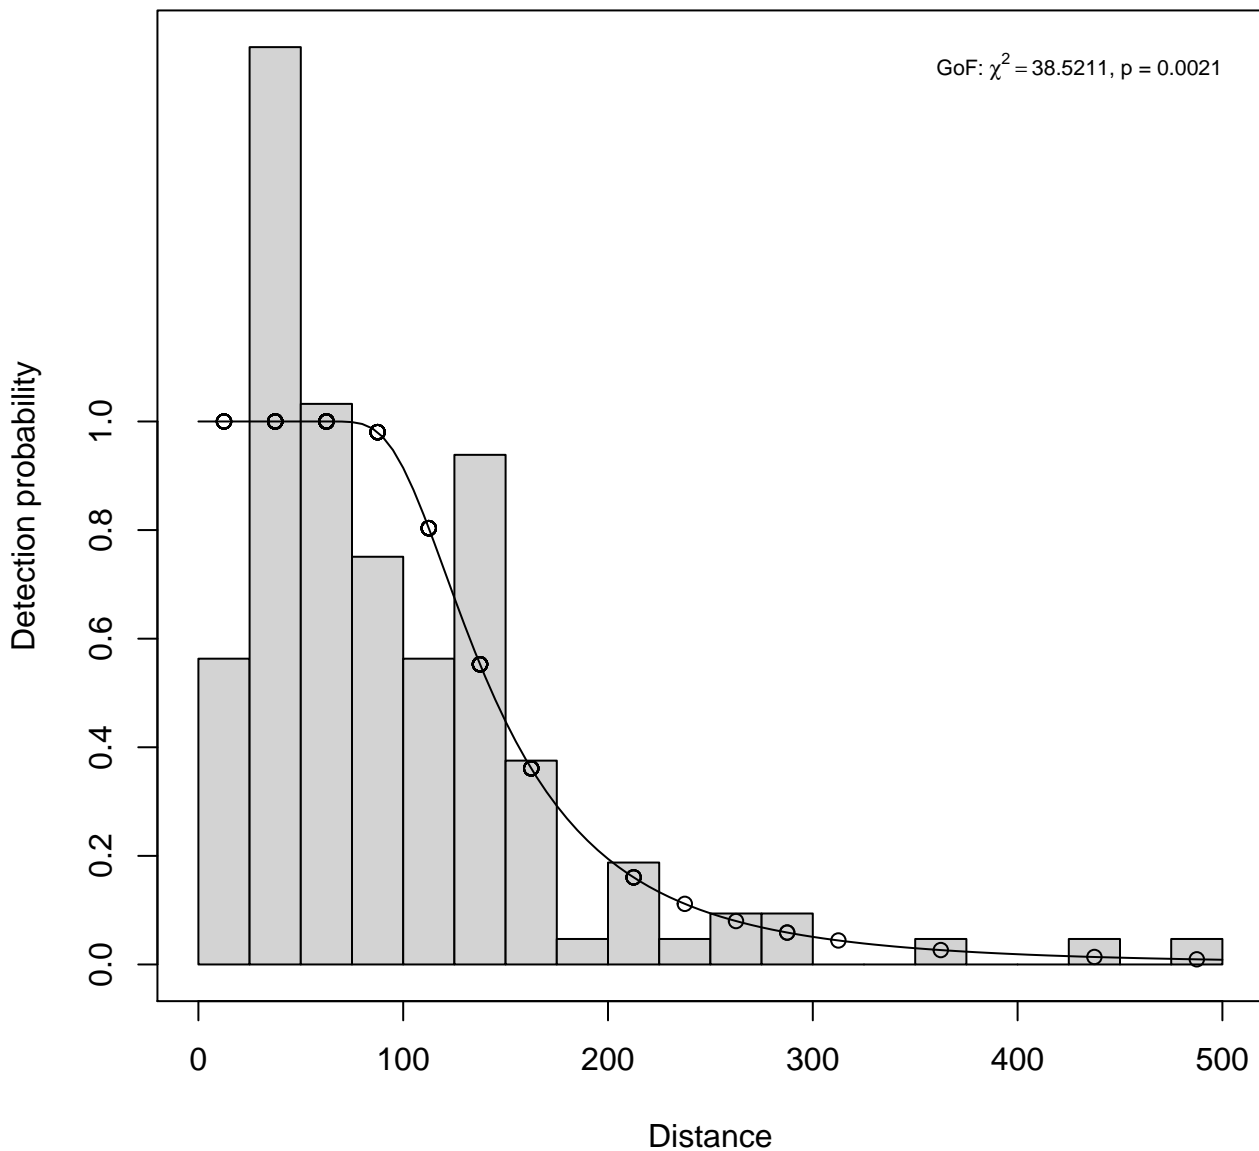

Supplement: s1 [file s1]
