# Supplementary material
Source: MDPI journal article supplement (https://www.mdpi.com/1424-2818/13/7/300)

# Pionus chalcopterus – Eastern Cordillera Real montane forests – Ecuador

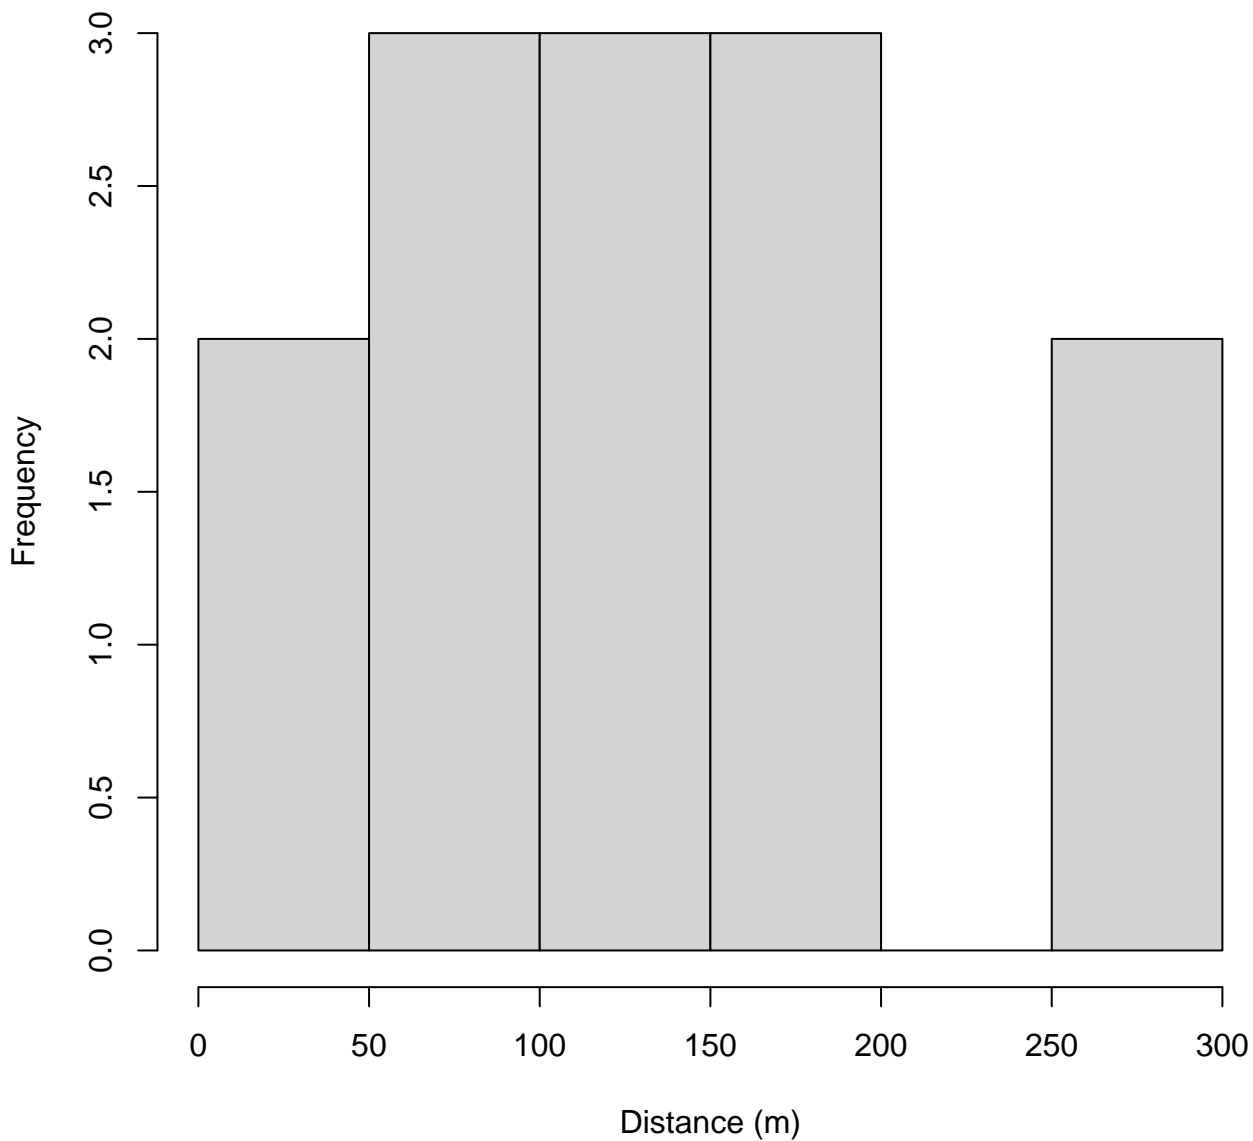

# Pionus chalcopterus – Eastern Cordillera Real montane forests – Ecuador

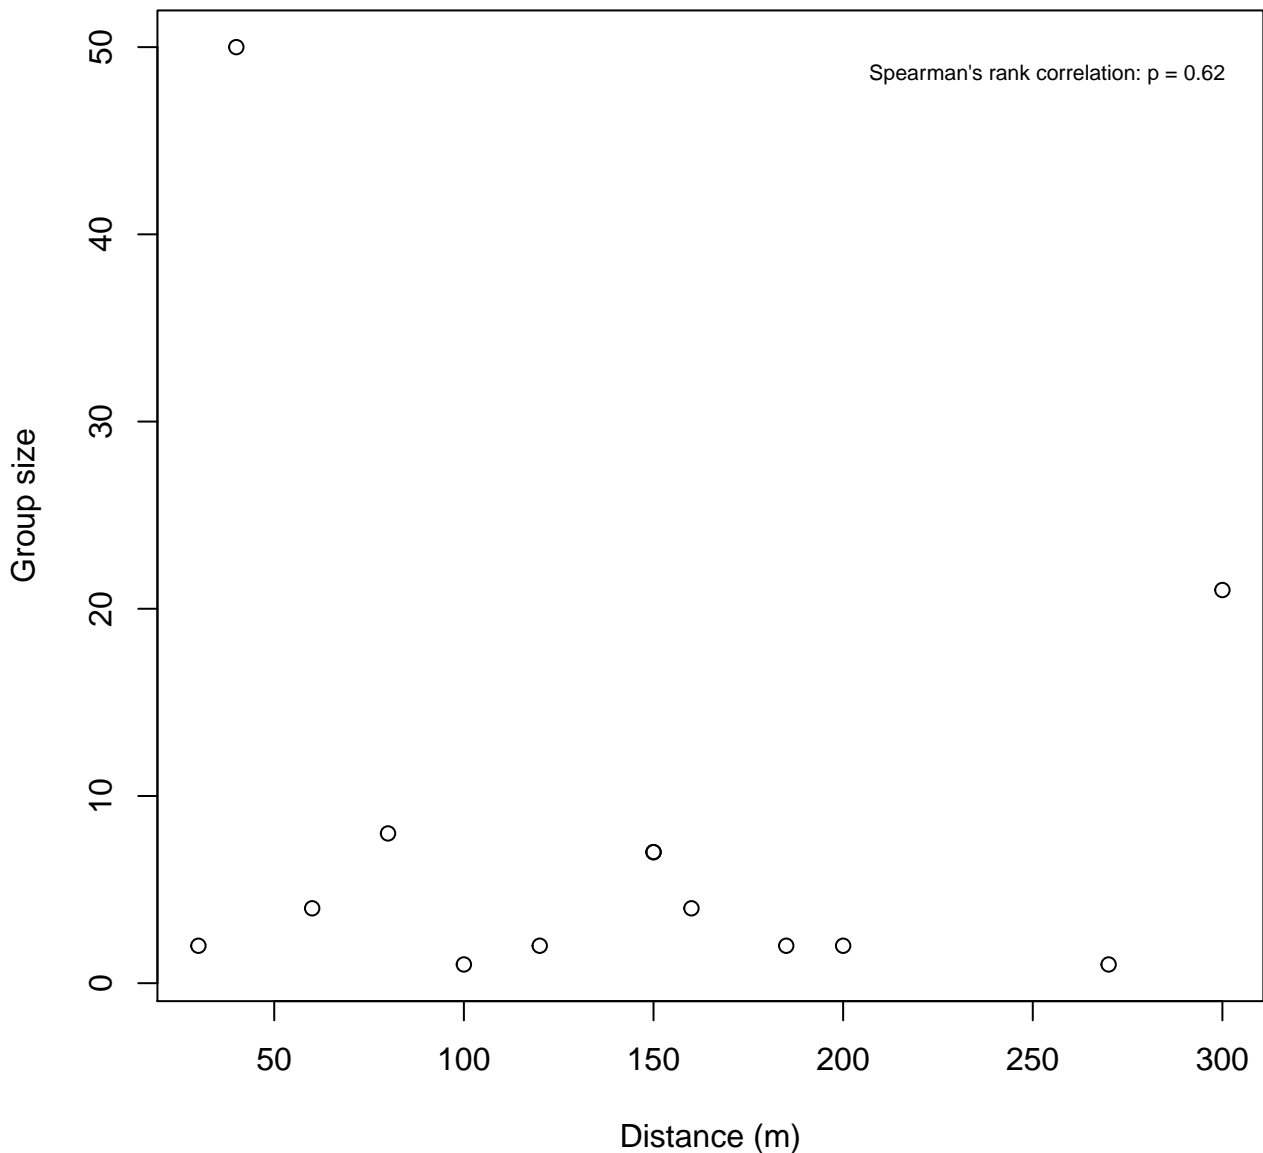

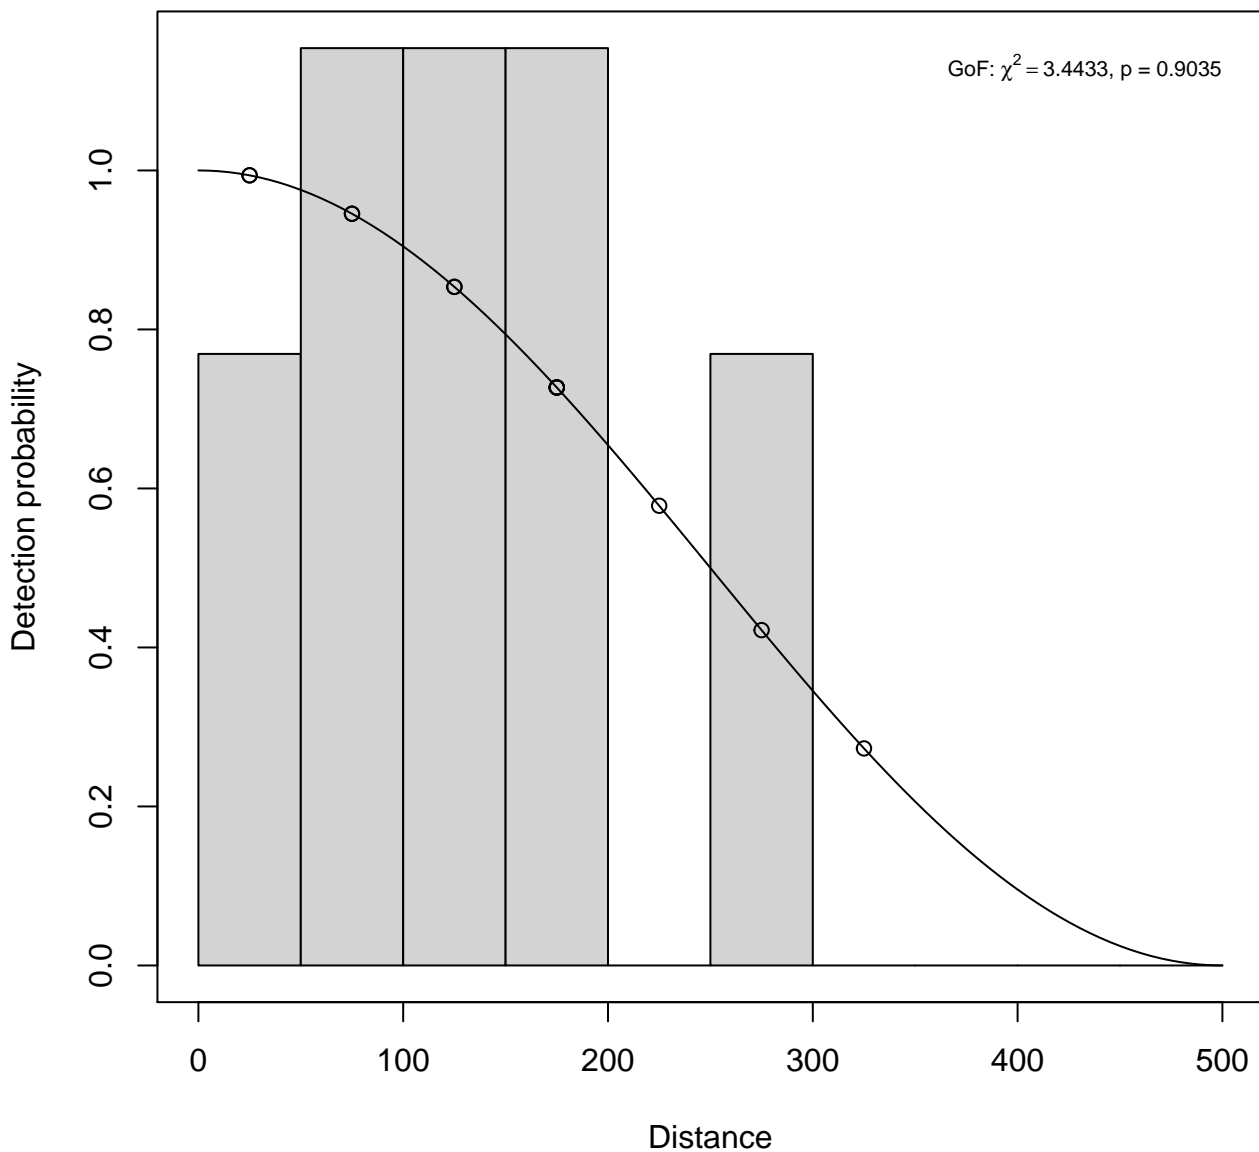

Pionus chalcopterus – Eastern Cordillera Real montane forests – Ecuador (N = 13, key function = unif)

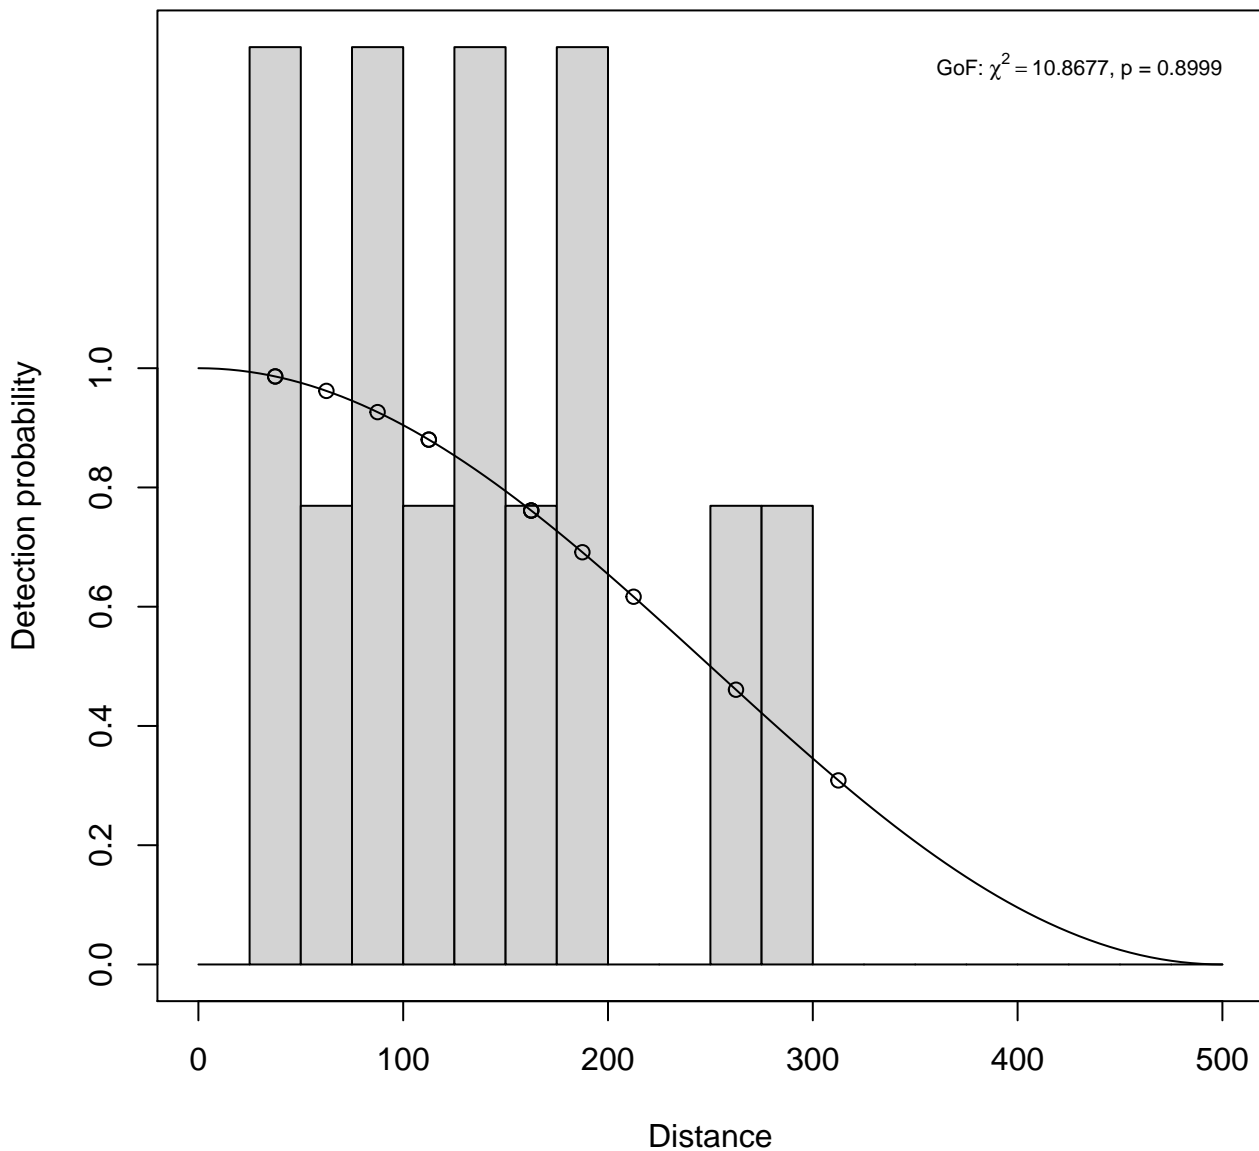

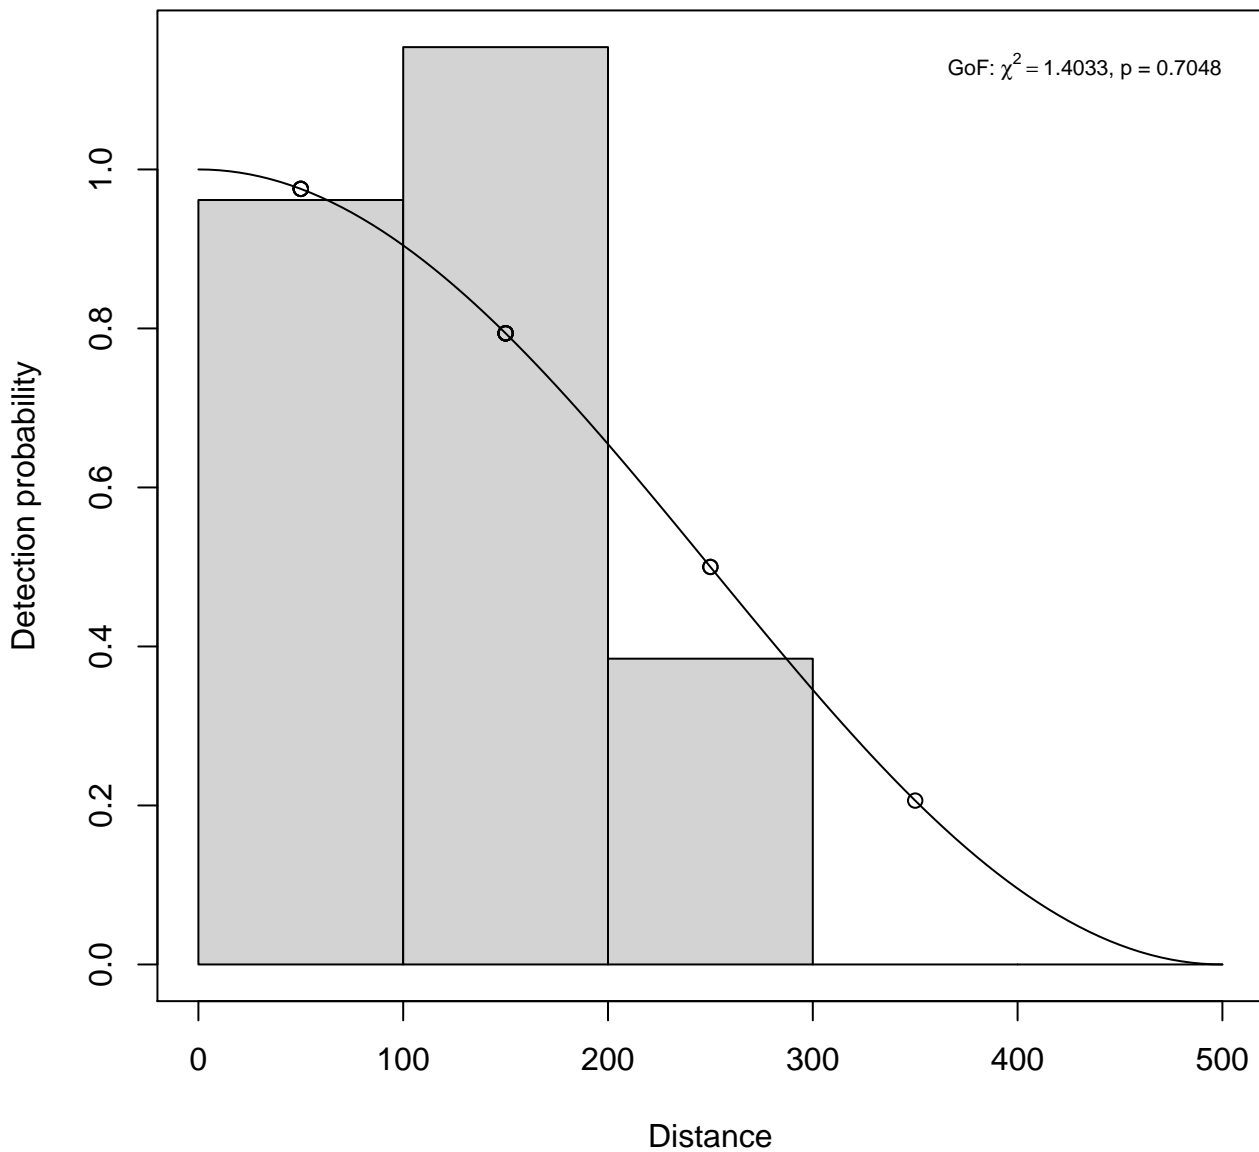

Supplement: s1 [file s1]
