# Supplementary material
Source: MDPI journal article supplement (https://www.mdpi.com/1424-2818/13/7/300)

# **Pionus menstruus – Isthmian–Pacific moist forests – Costa Rica**

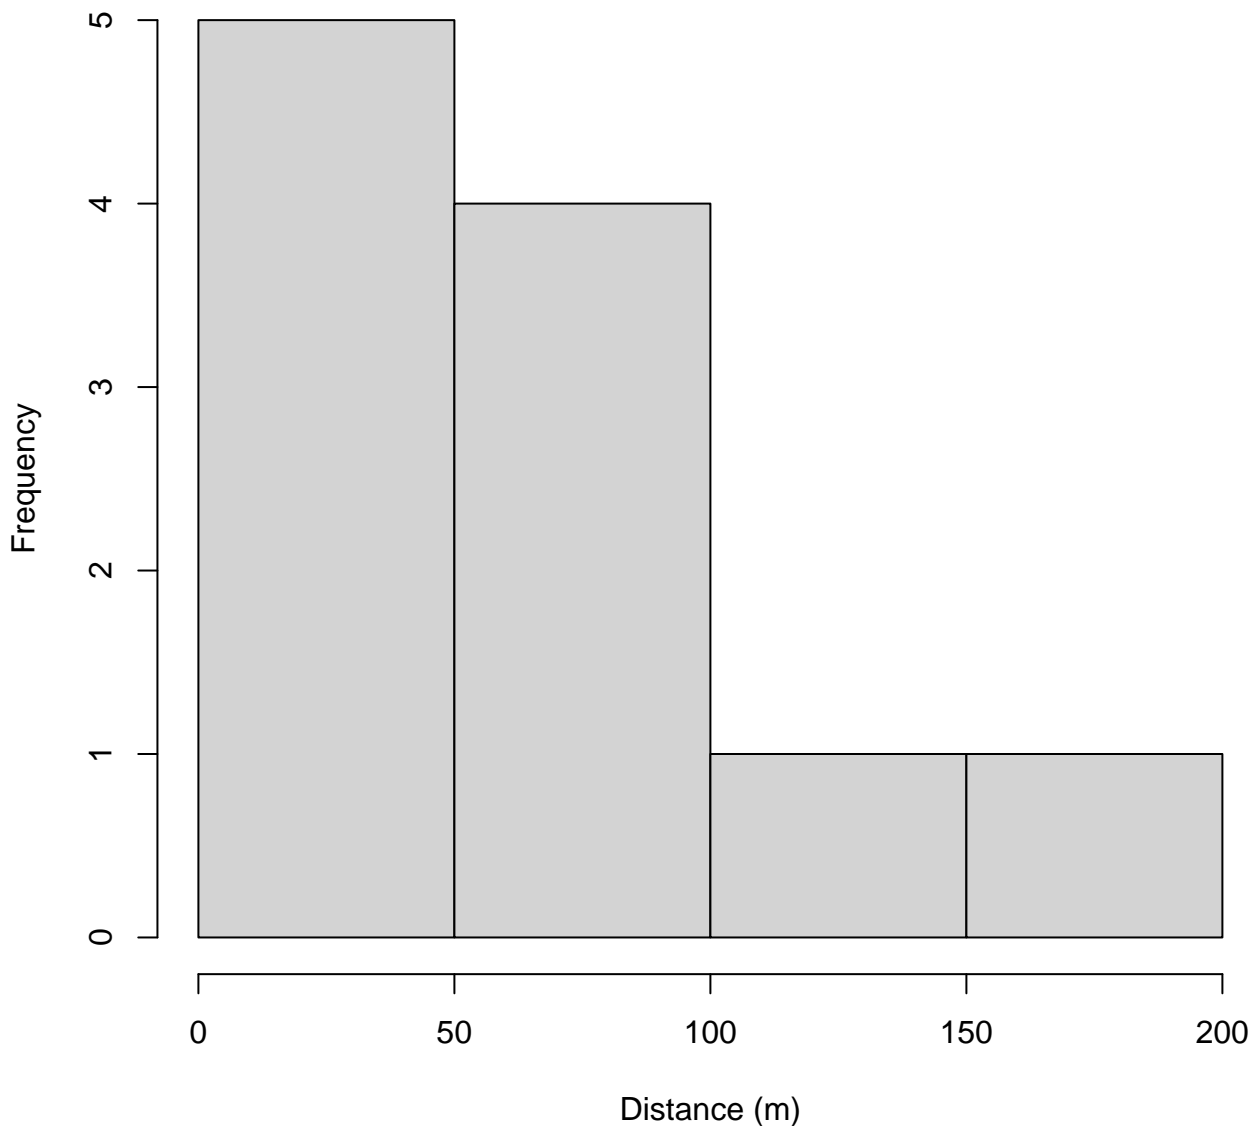



# Pionus menstruus – Isthmian–Pacific moist forests – Costa Rica

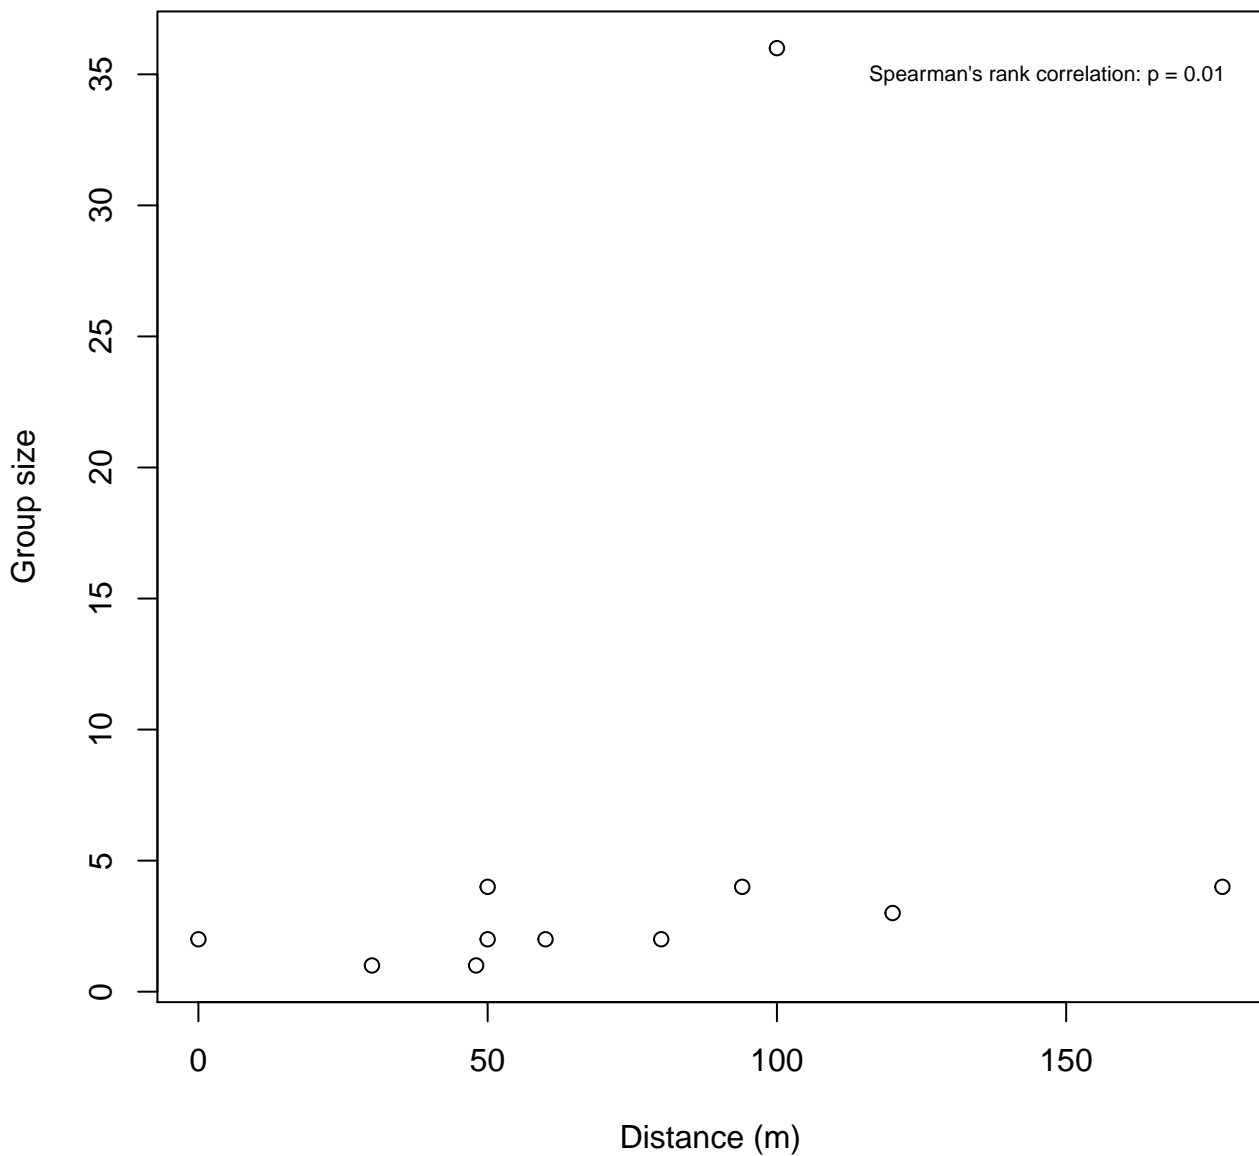



Pionus menstruus – Isthmian–Pacific moist forests – Costa Rica (N = 11, key function = hn)

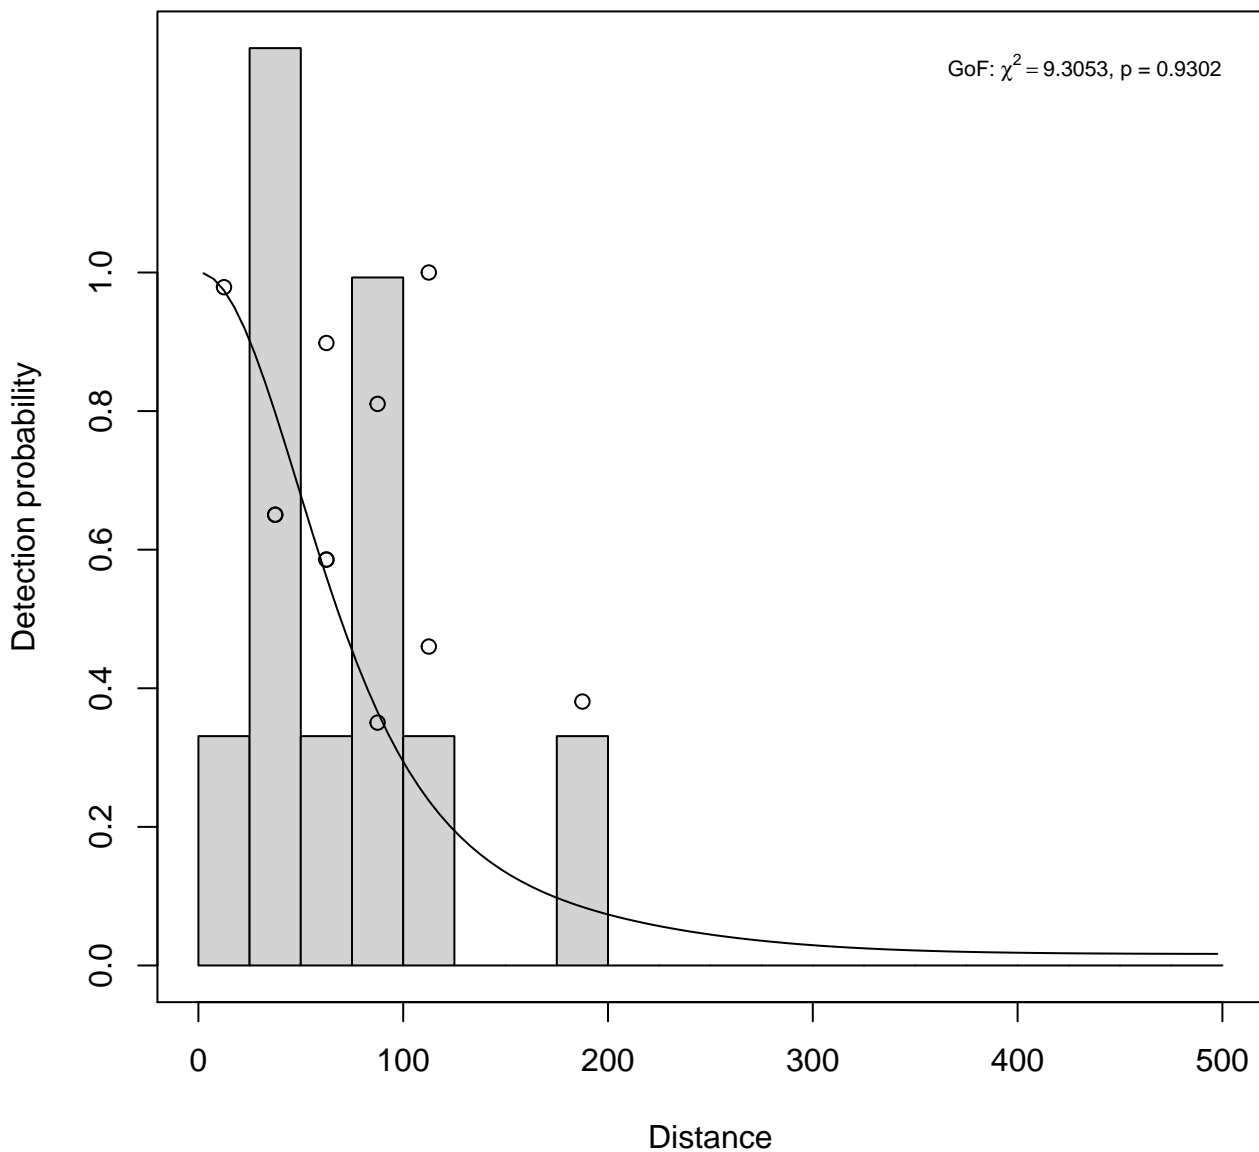



*Pionus menstruus* – Isthmian–Pacific moist forests – Costa Rica (N = 11, key function = hn)

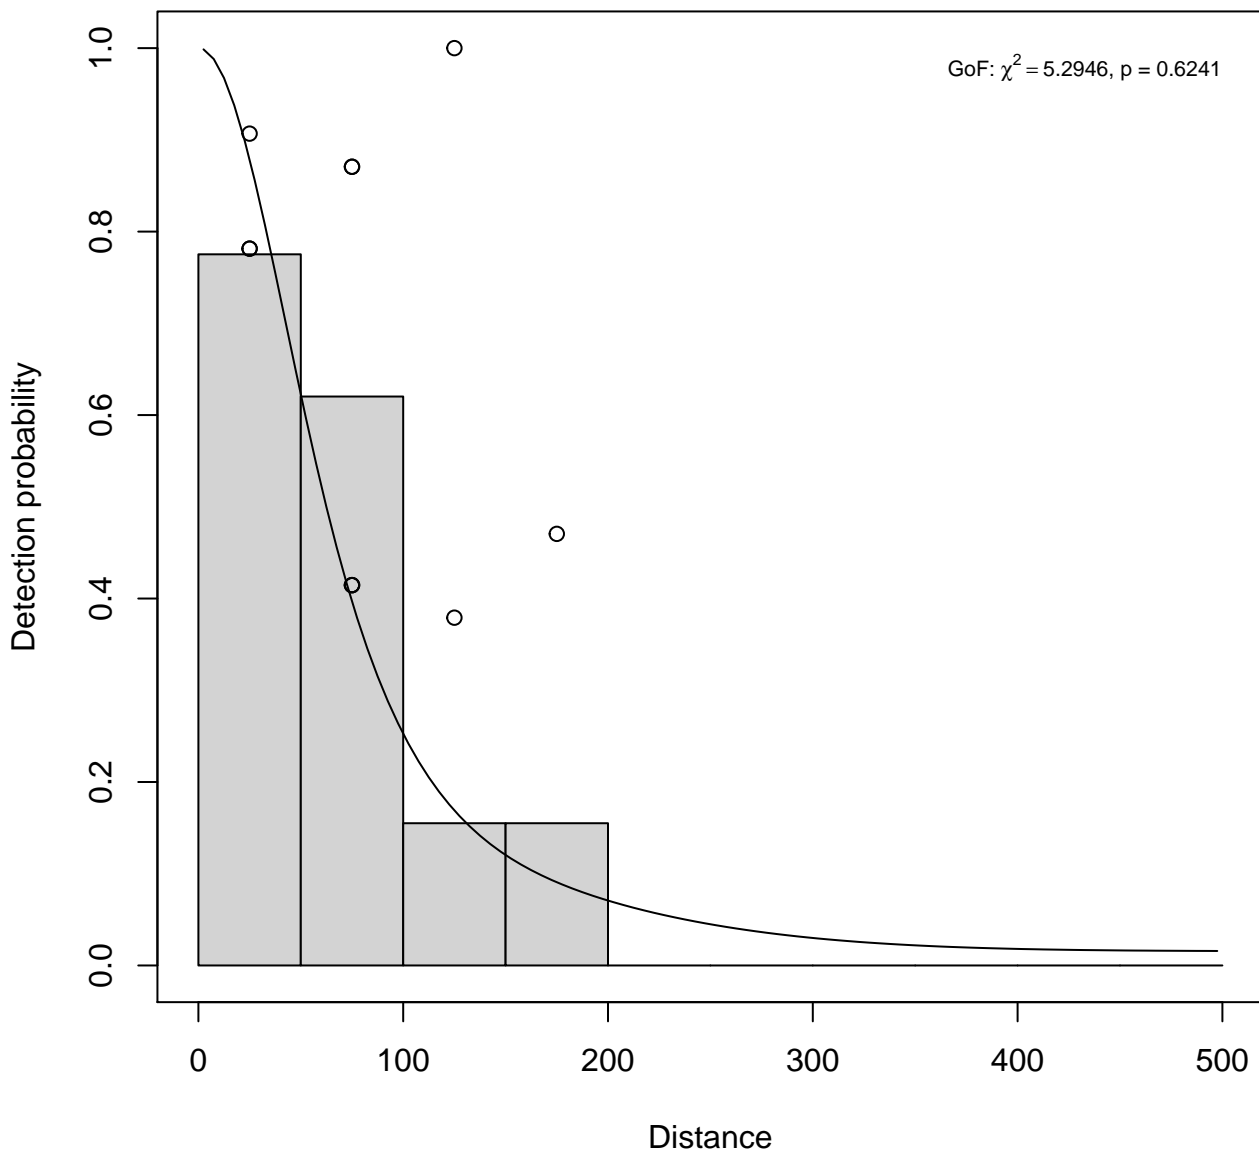



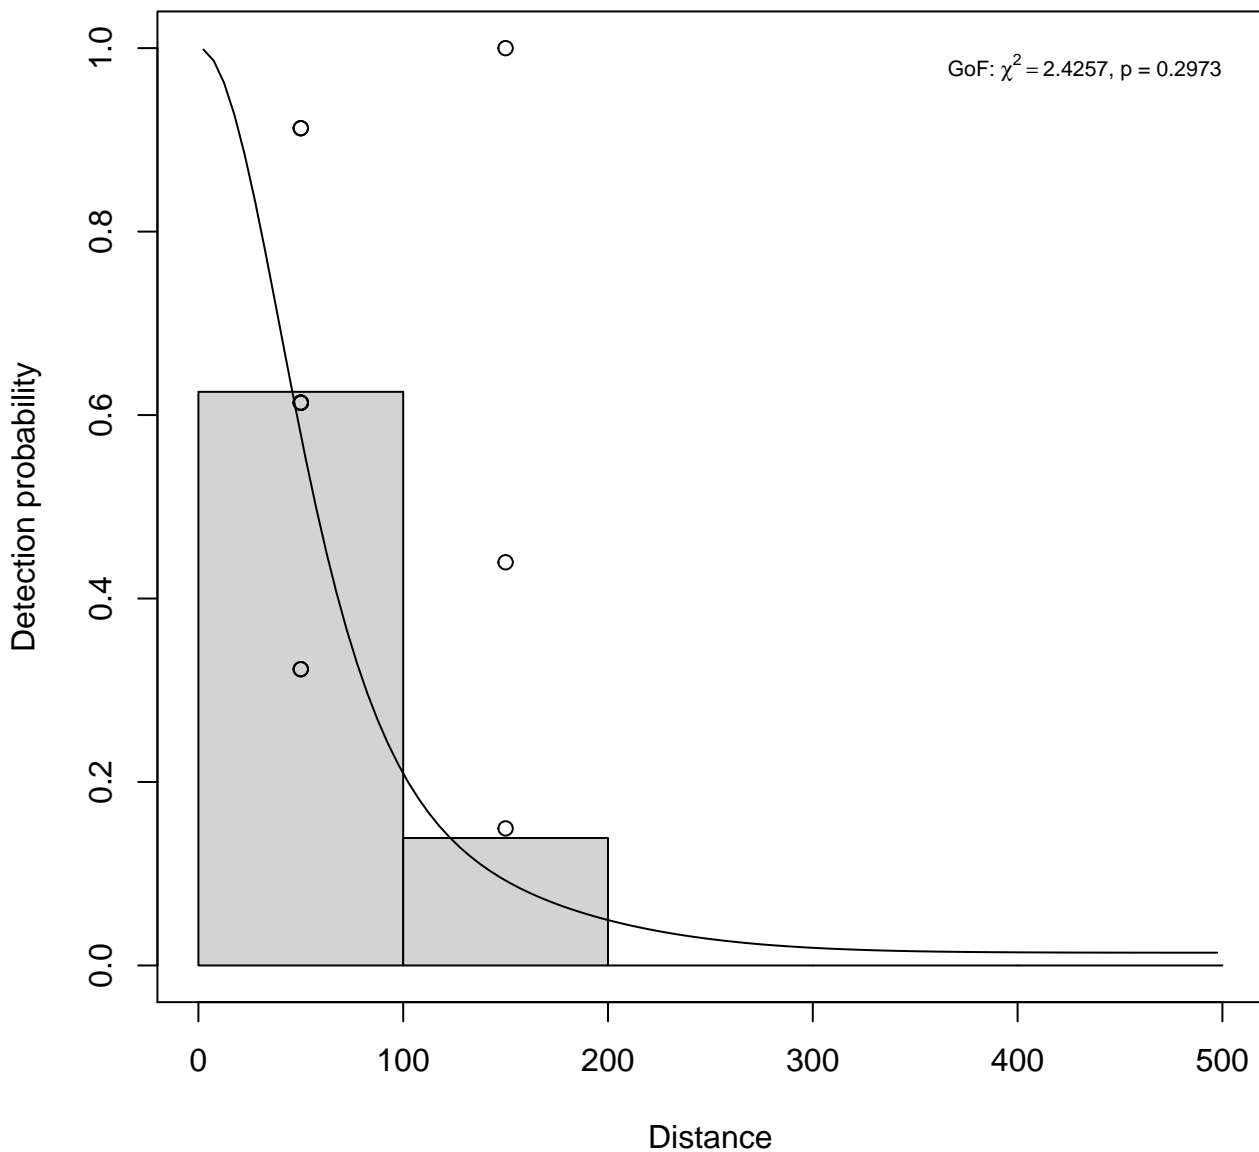

Supplement: s1 [file s1]
