# Supplementary material
Source: MDPI journal article supplement (https://www.mdpi.com/1424-2818/13/7/300)

# ***Pyrrhura molinae* – Chiquitano dry forests – Bolivia**

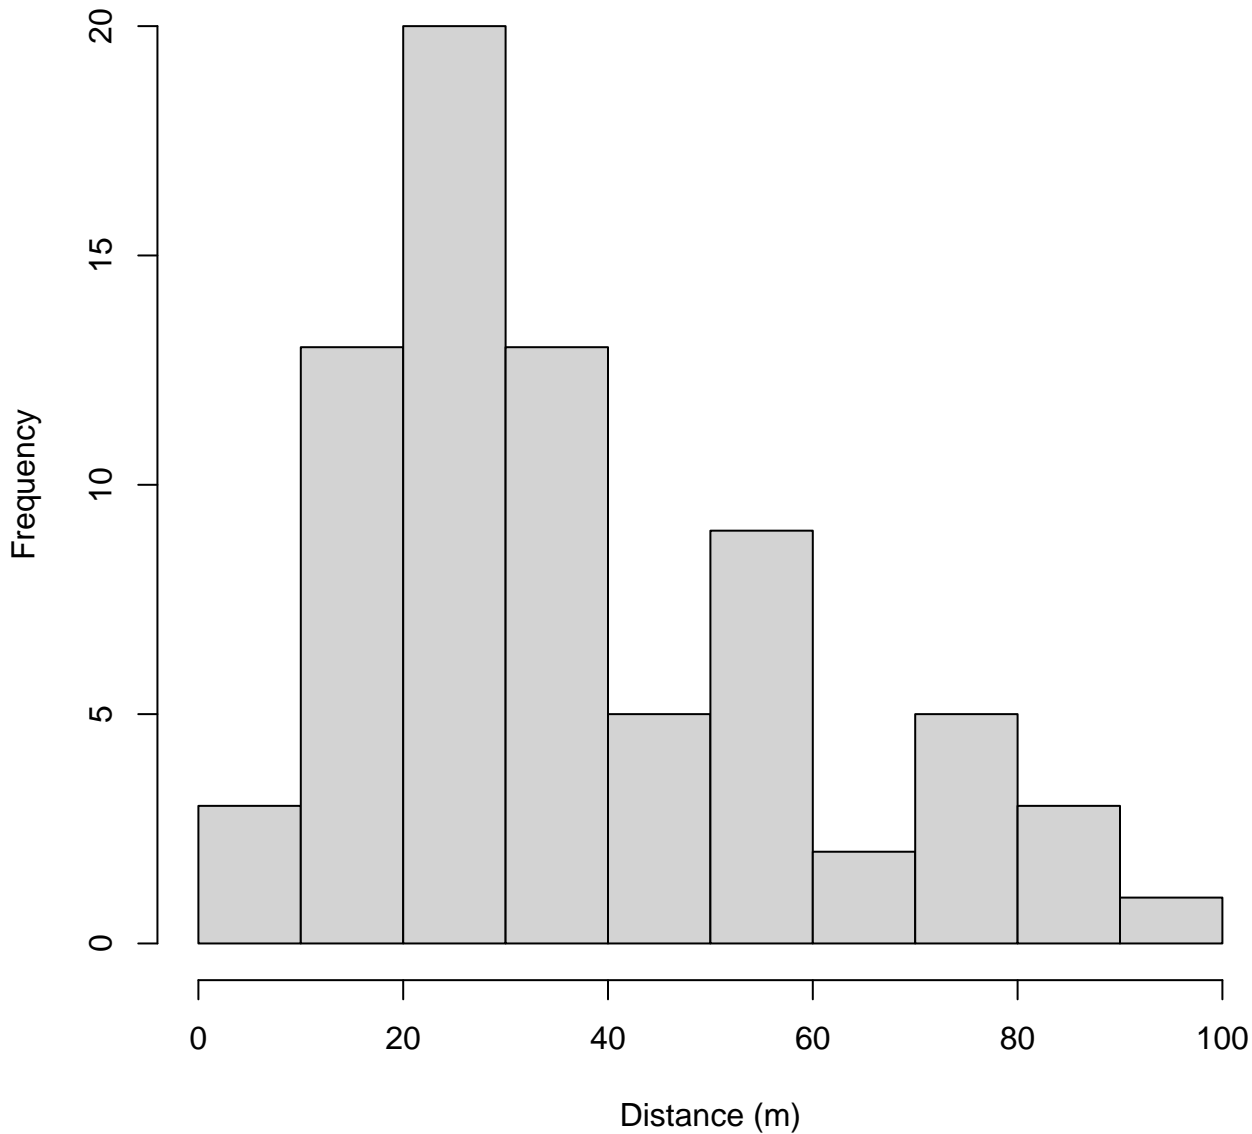

# Pyrrhura molinae – Chiquitano dry forests – Bolivia

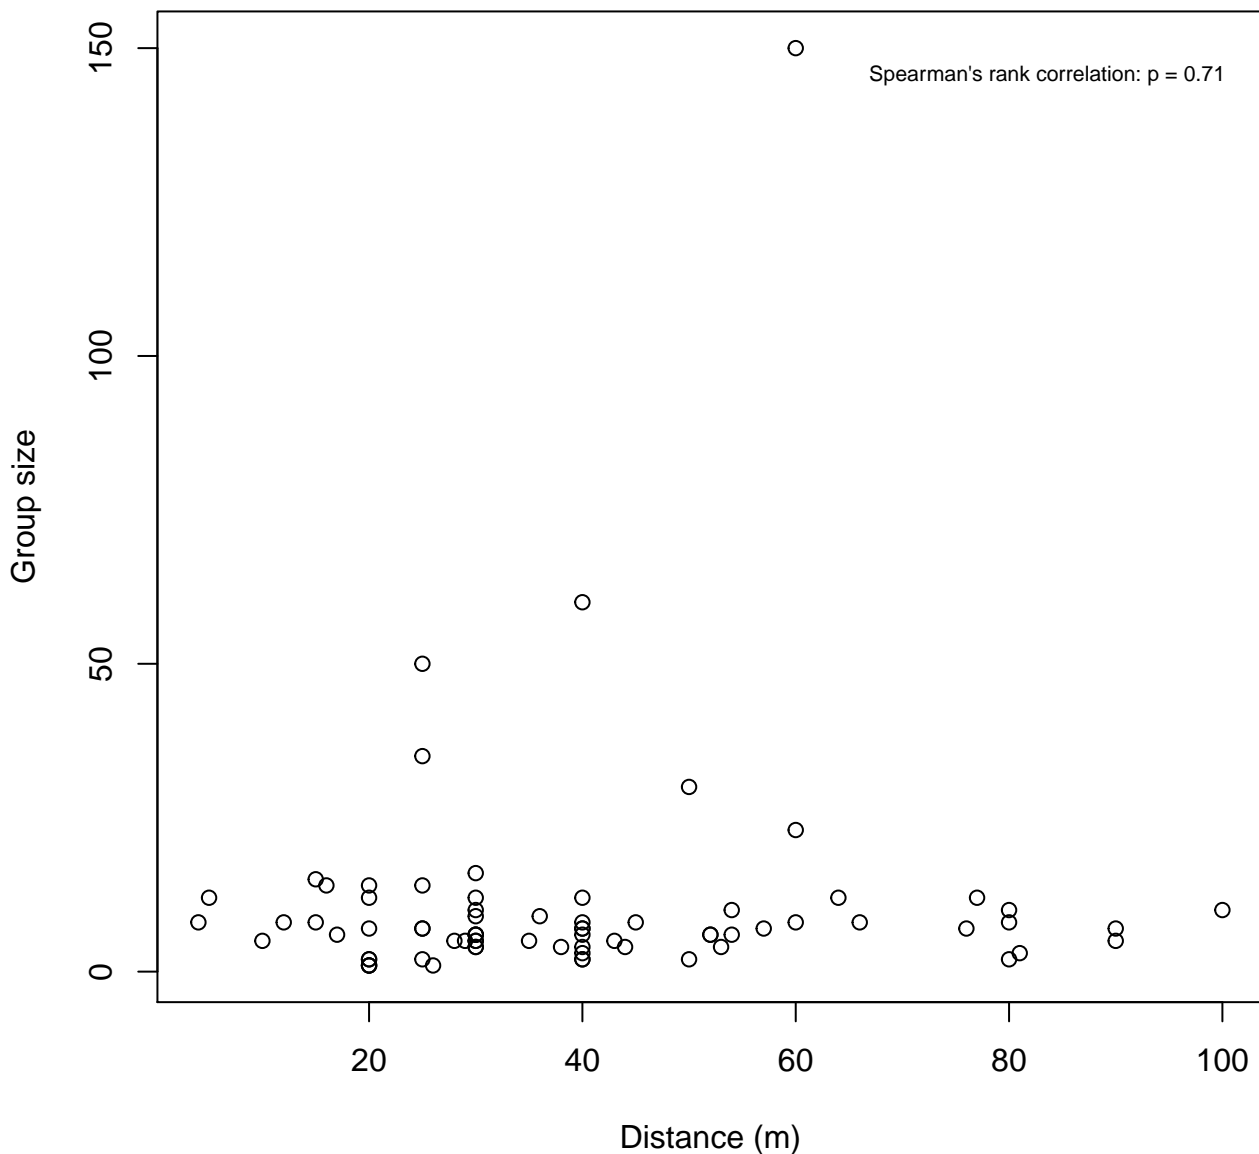

*Pyrrhura molinae* – Chiquitano dry forests – Bolivia (N = 74, key function = hn)

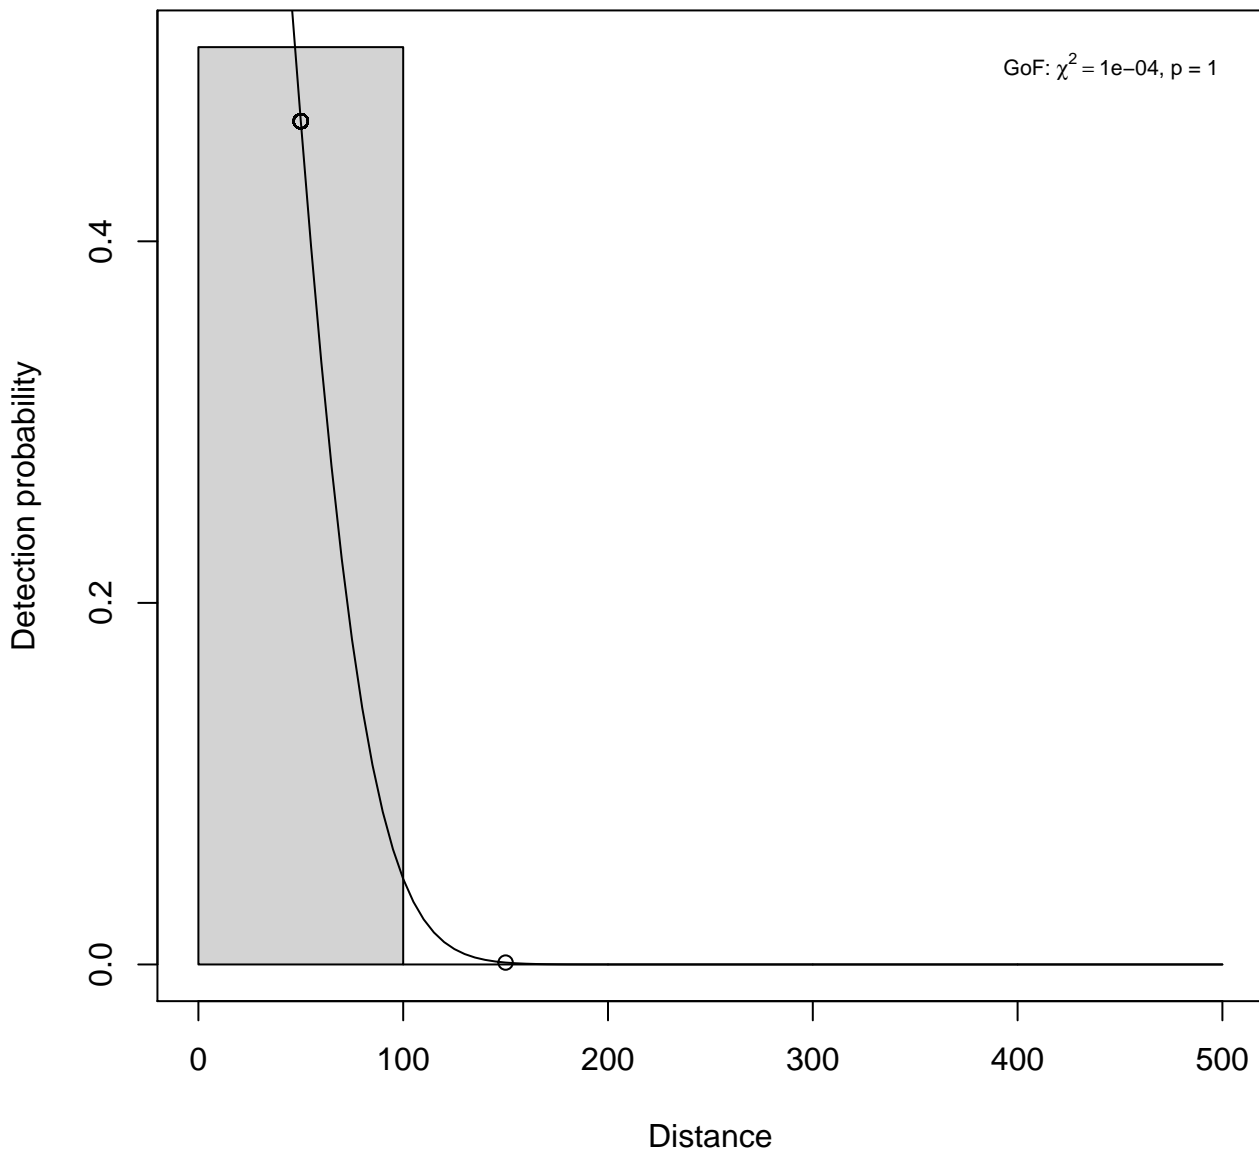

*Pyrrhura molinae* – Chiquitano dry forests – Bolivia (N = 74, key function = hn)

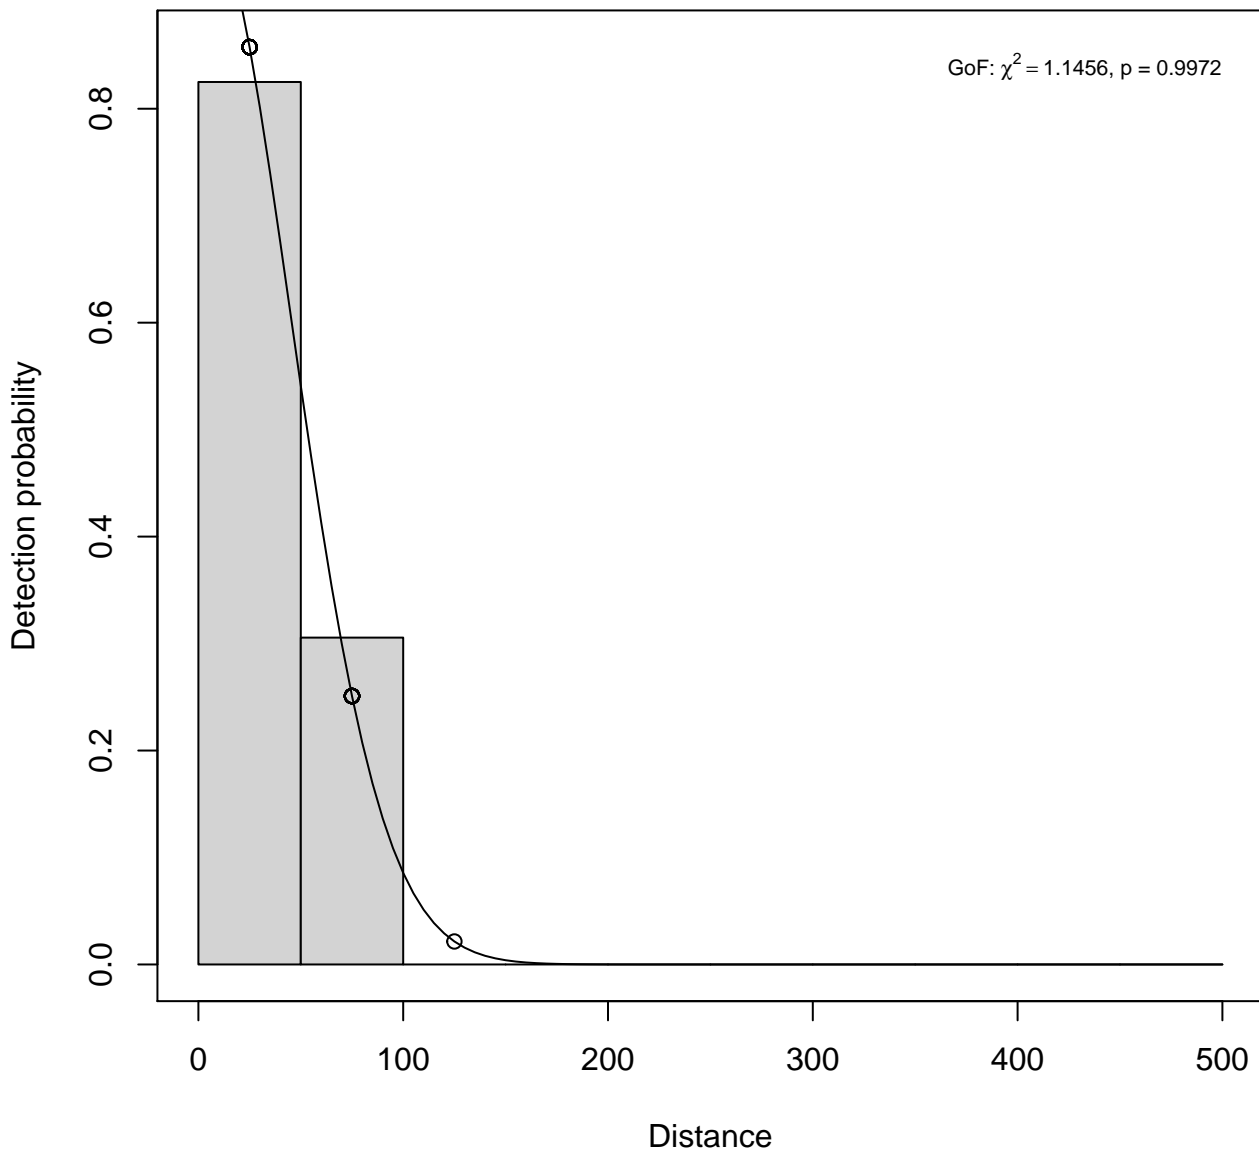

*Pyrrhura molinae* – Chiquitano dry forests – Bolivia (N = 74, key function = hn)

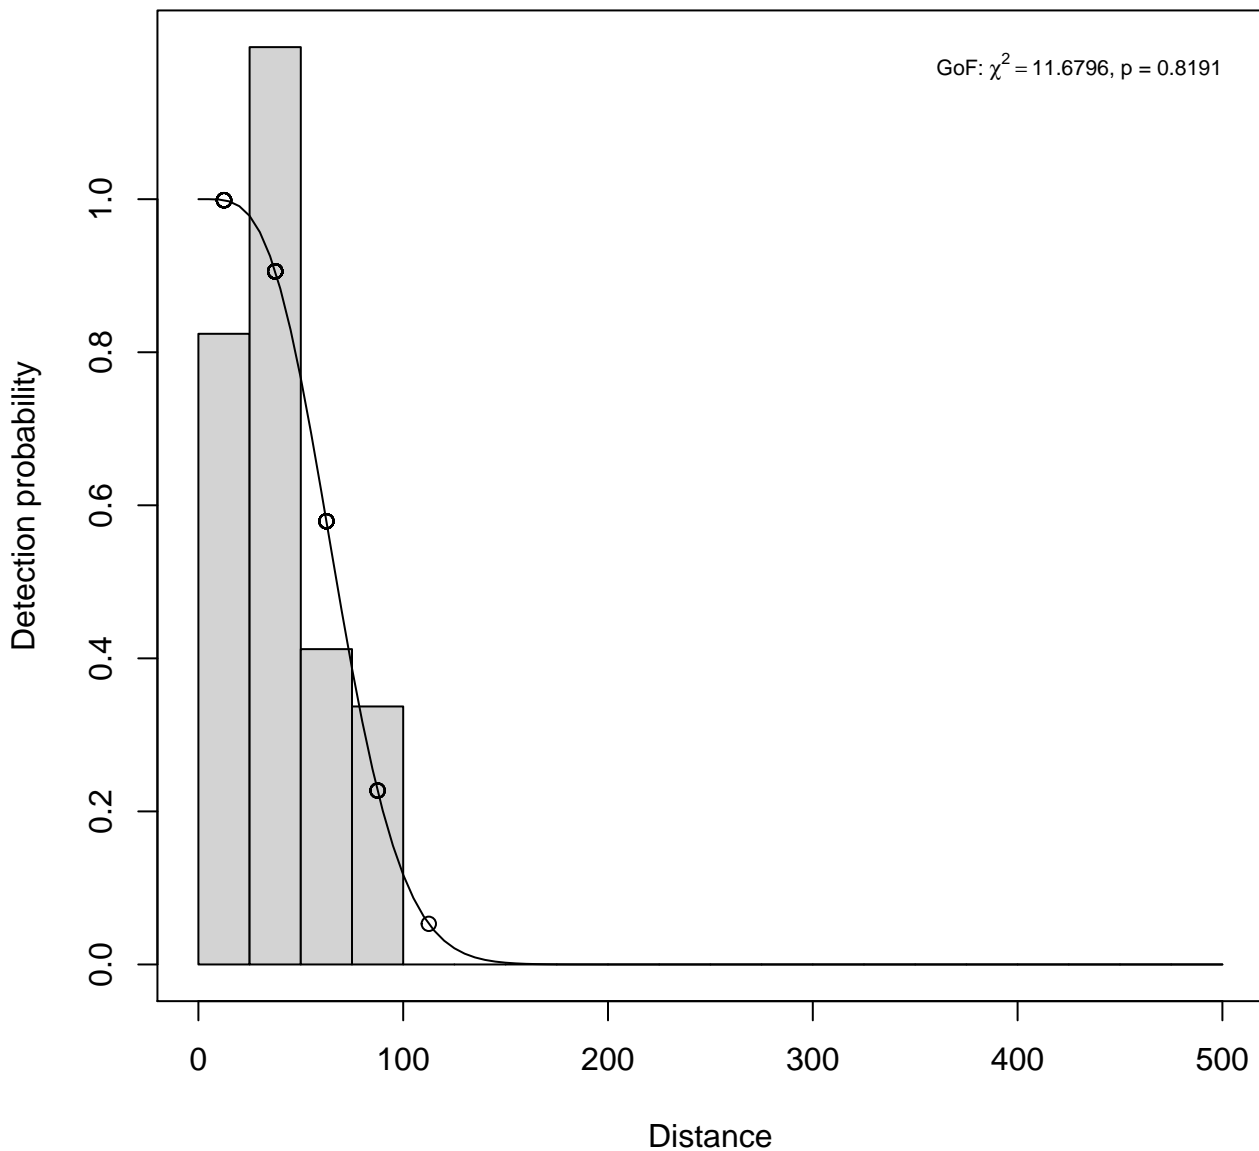

Supplement: s1 [file s1]
