# Supplementary material
Source: MDPI journal article supplement (https://www.mdpi.com/1424-2818/13/7/300)

# Aratinga weddellii – Ucayali moist forests – Peru

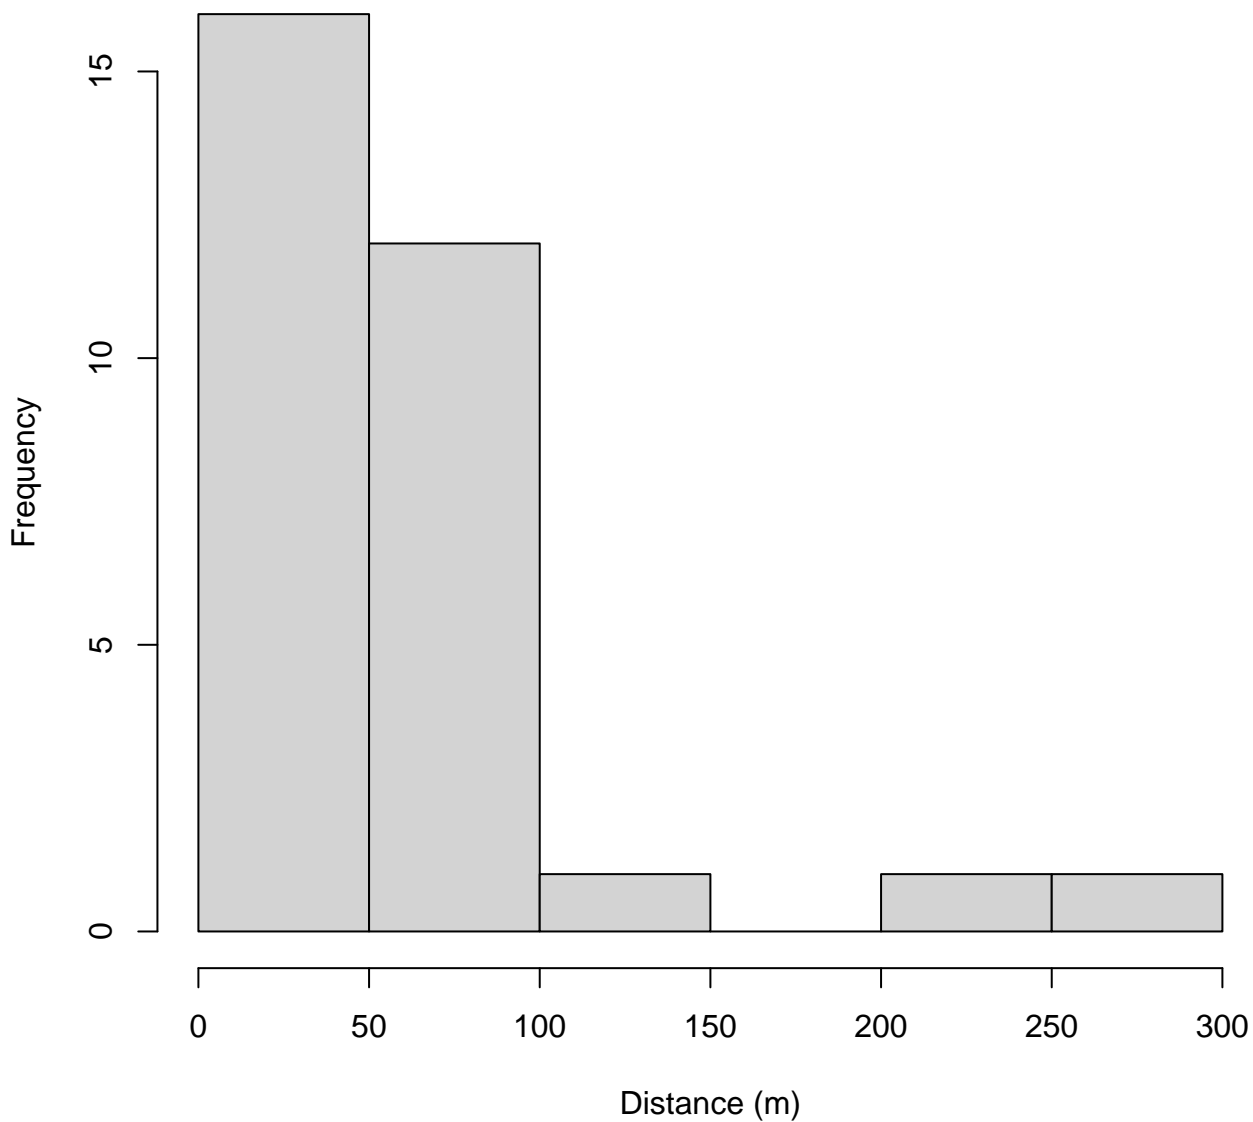

# Aratinga weddellii – Ucayali moist forests – Peru

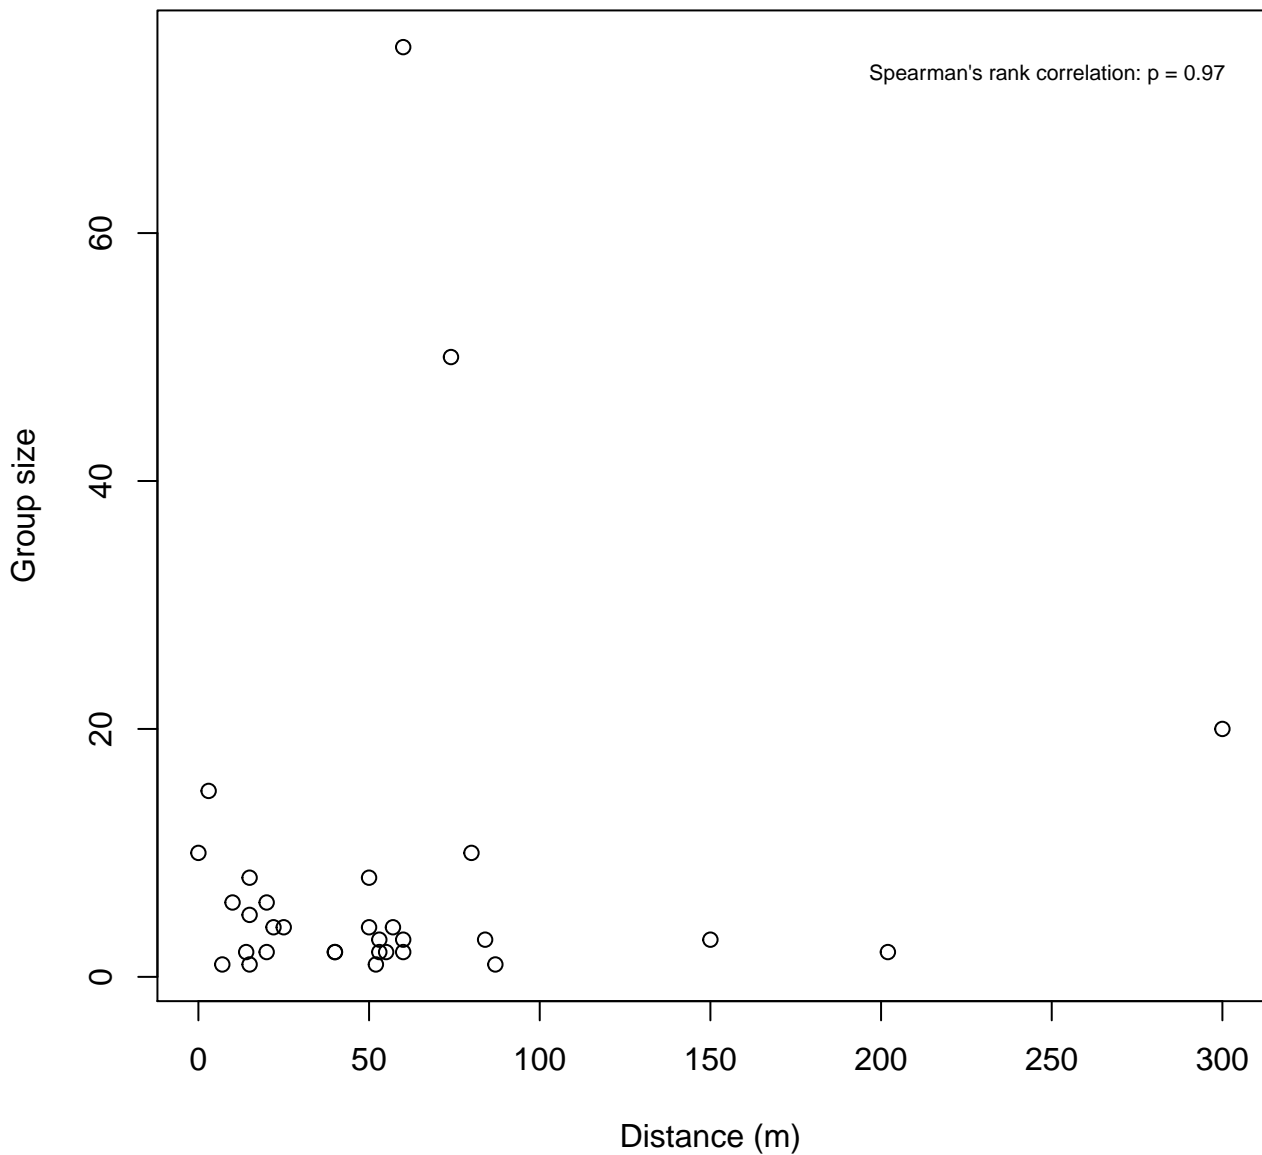

Aratinga weddellii – Ucayali moist forests – Peru (N = 31, key function = hr)

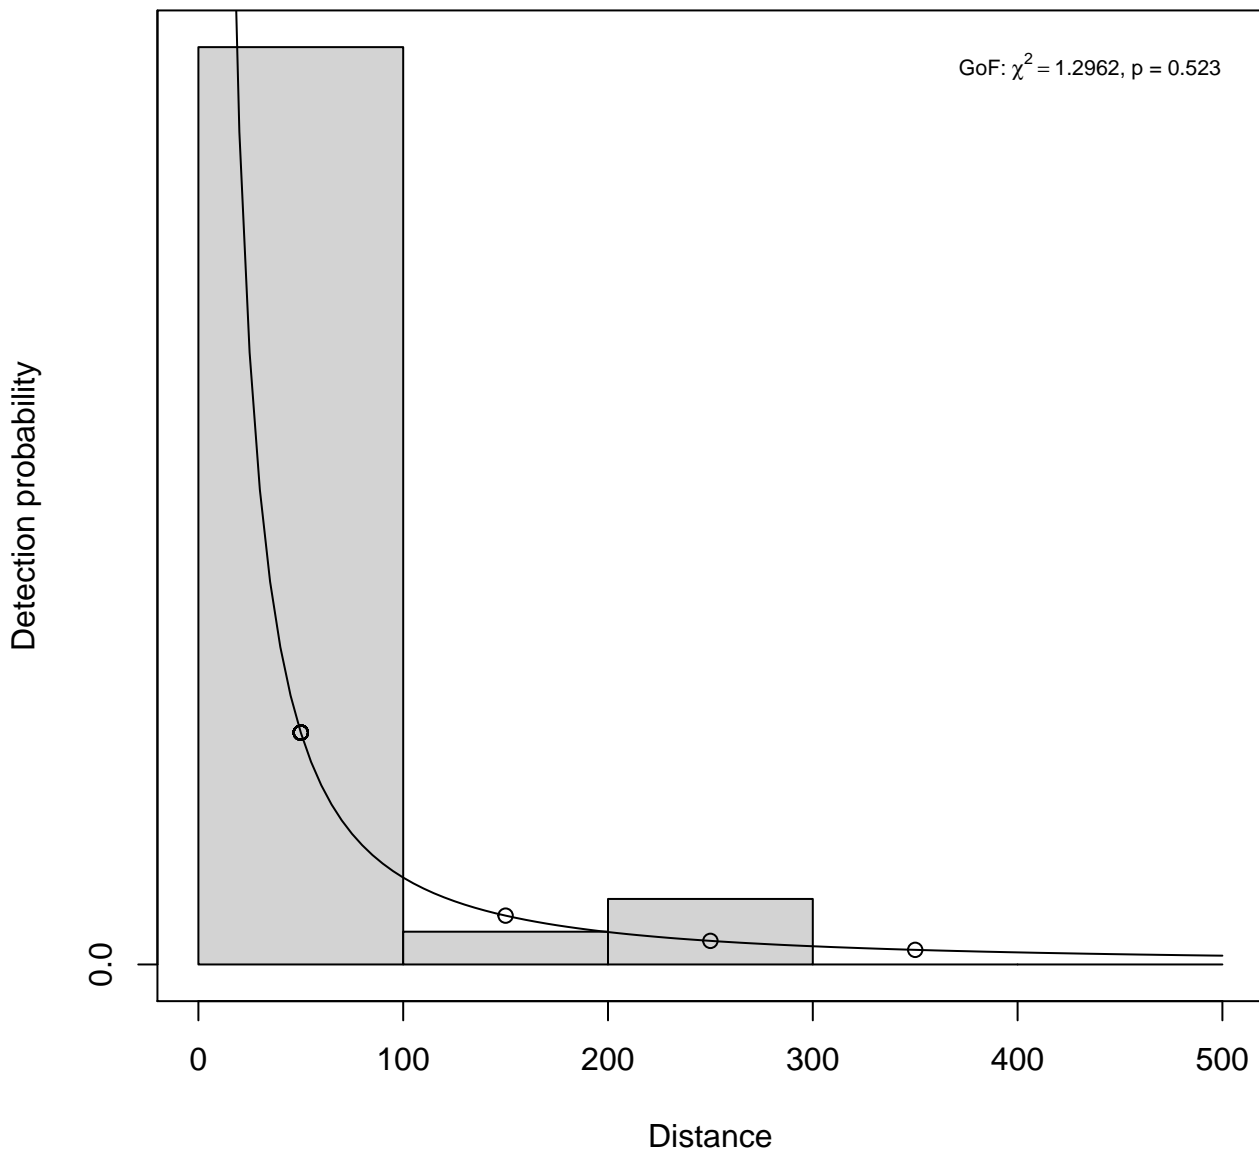

Aratinga weddellii – Ucayali moist forests – Peru (N = 31, key function = hr)

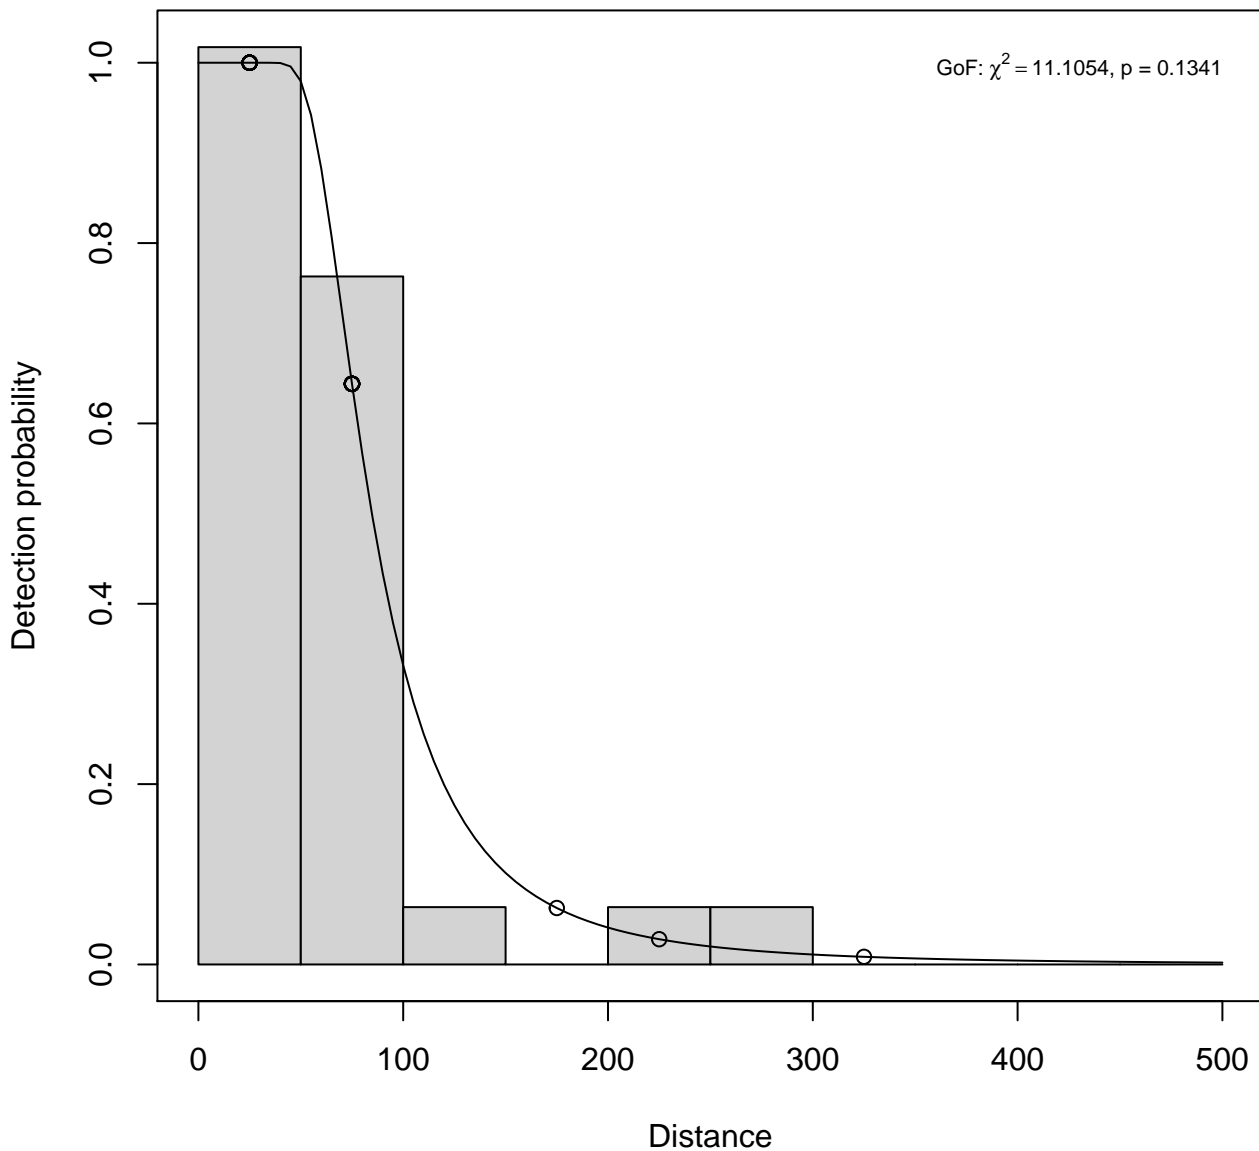

Aratinga weddellii – Ucayali moist forests – Peru (N = 31, key function = hr)

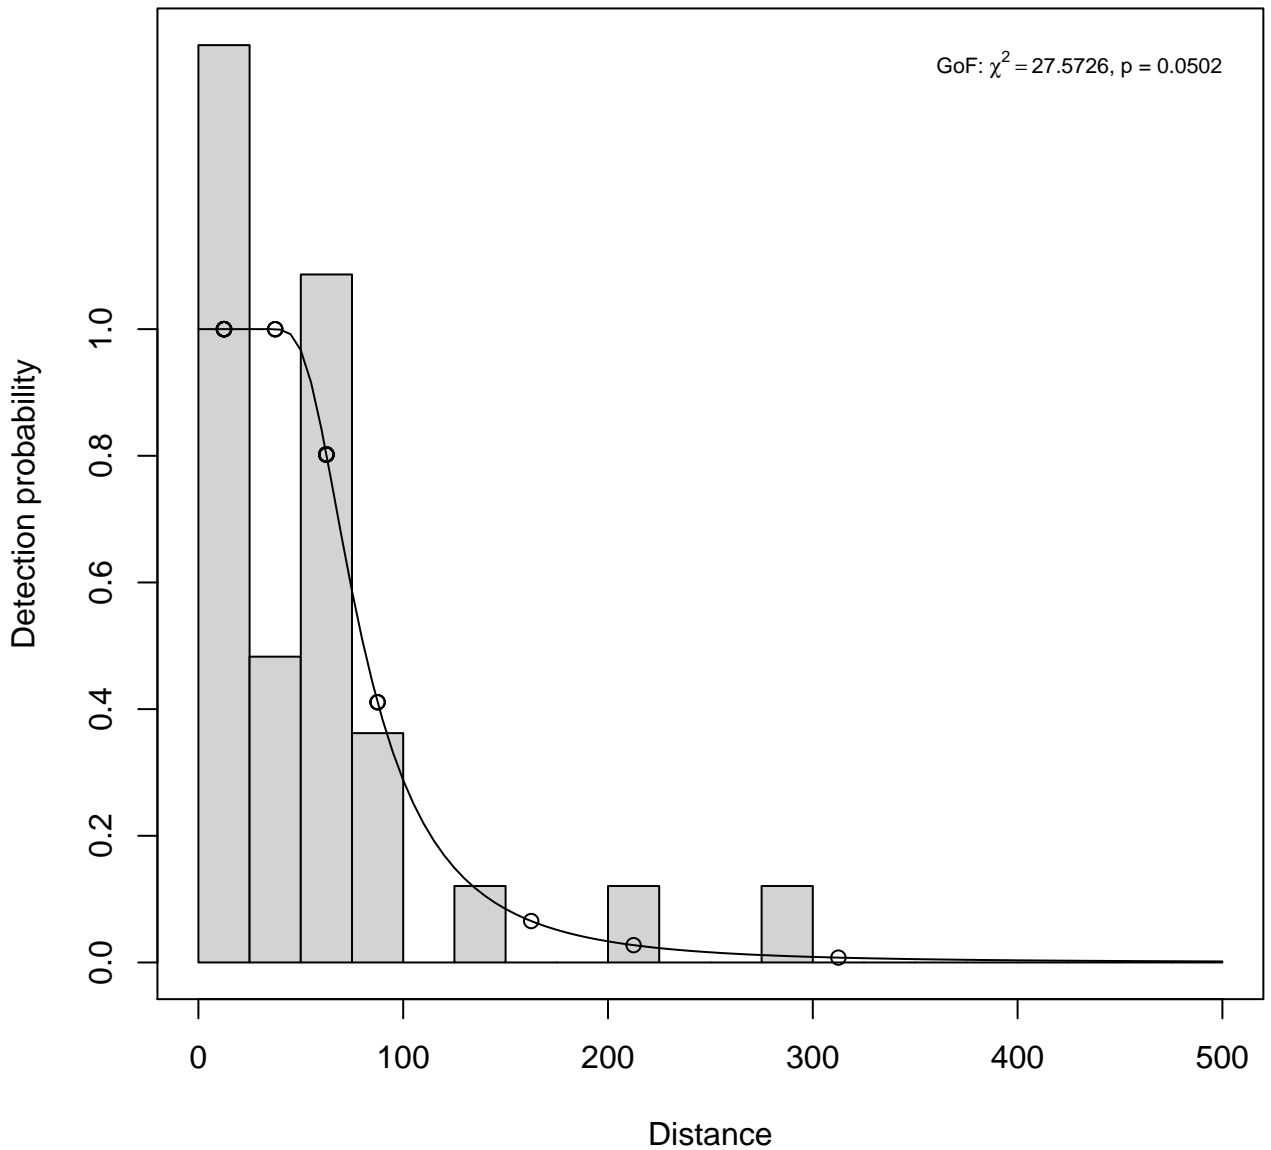

Supplement: s1 [file s1]
