# Supplementary material
Source: MDPI journal article supplement (https://www.mdpi.com/1424-2818/13/7/300)

# Cyanoliseus patagonus – High Monte – Argentina

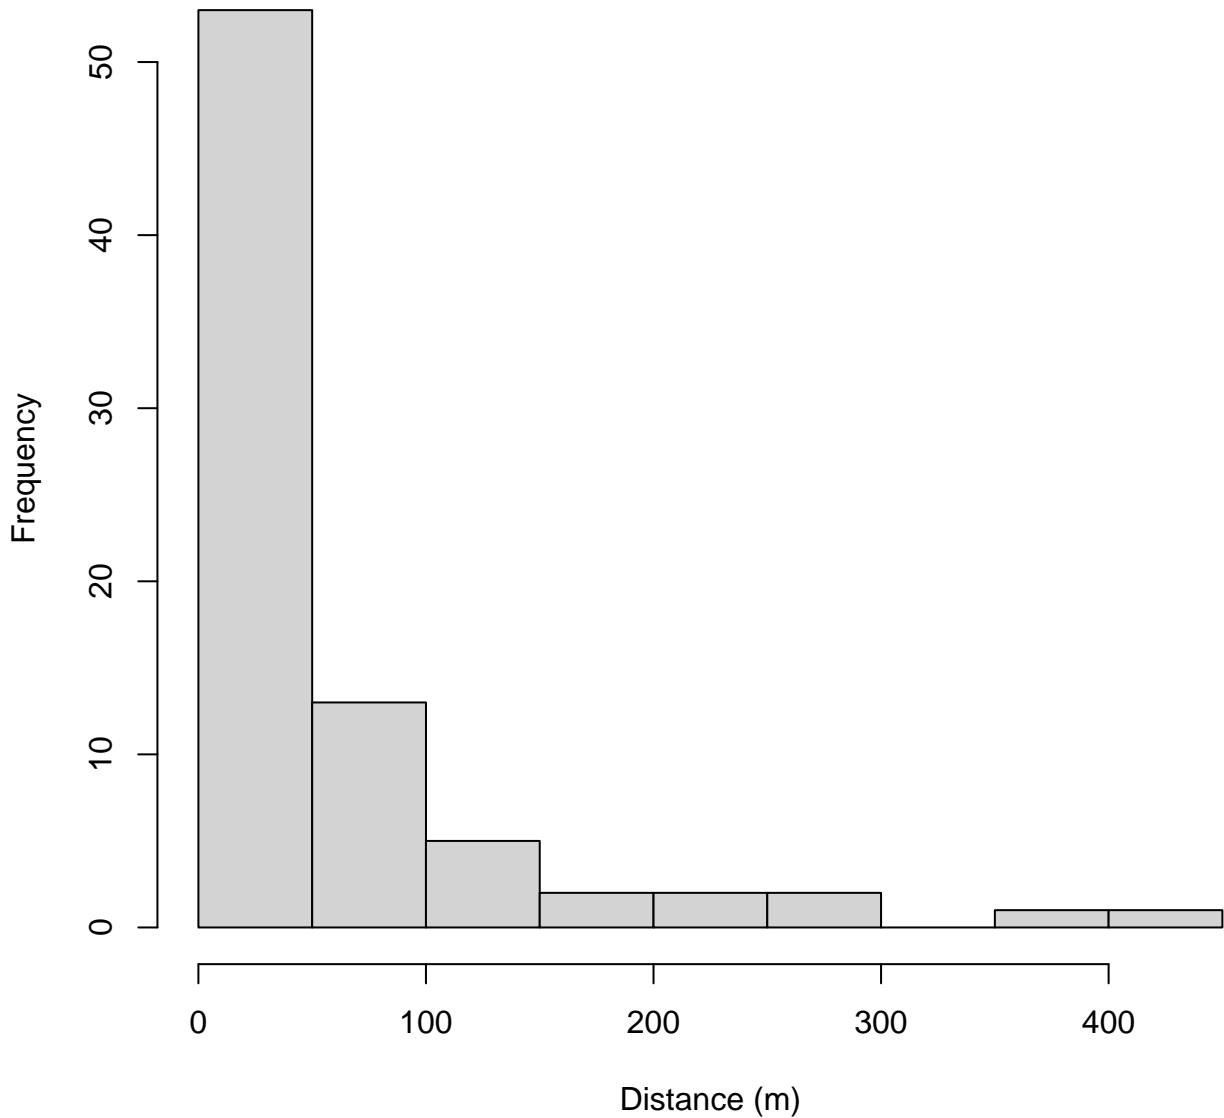

# Cyanoliseus patagonus – High Monte – Argentina

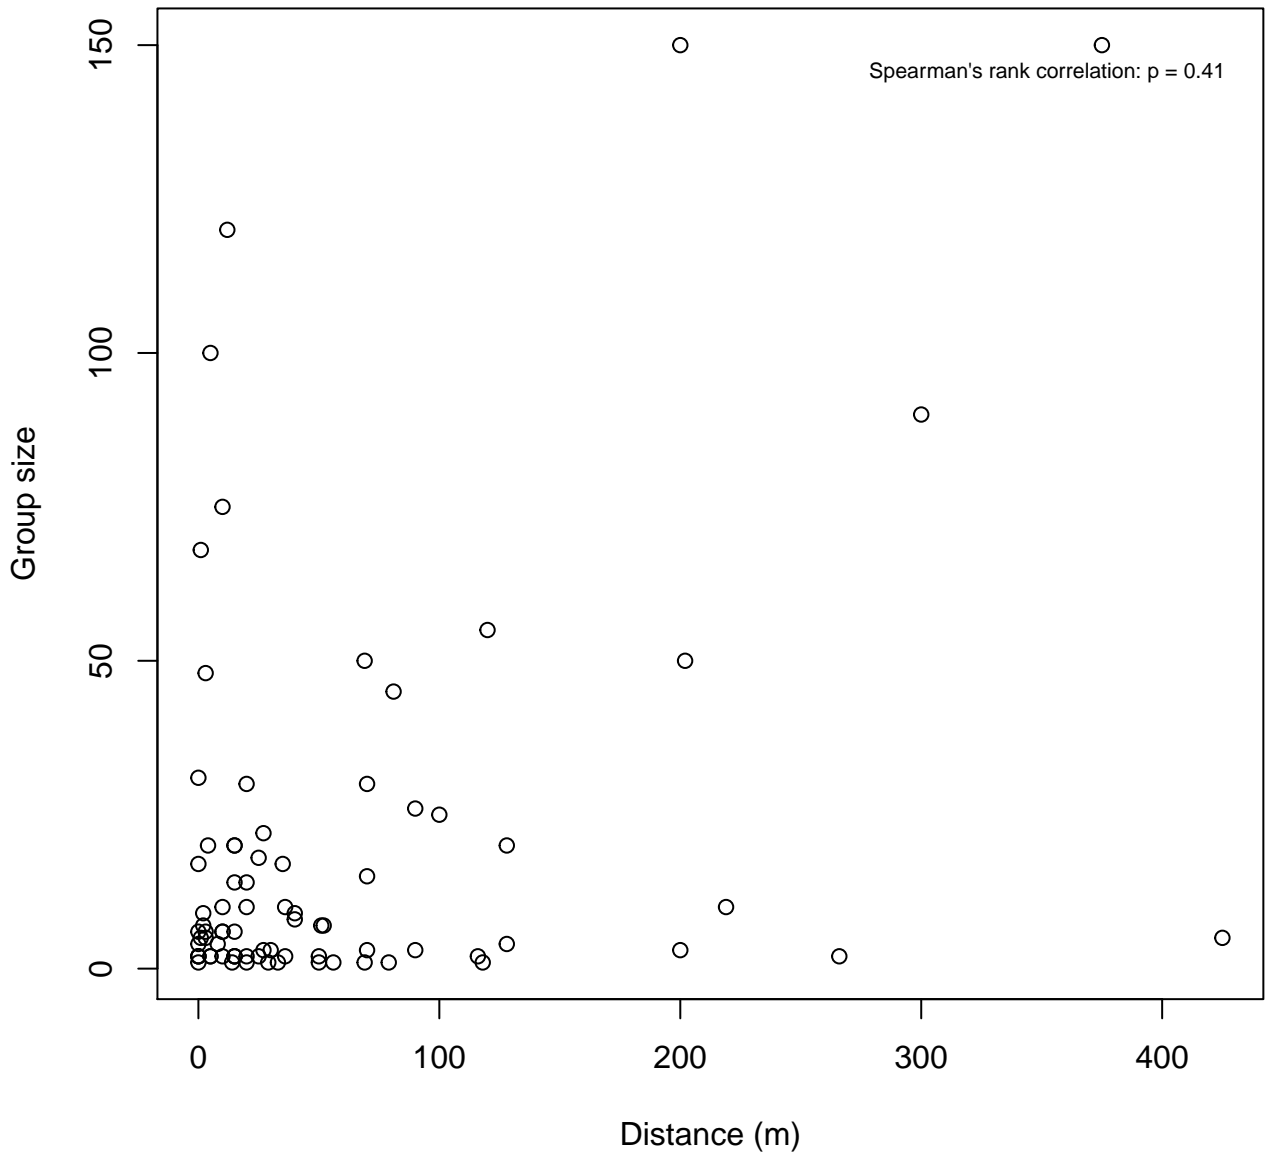

Cyanoliseus patagonus – High Monte – Argentina (N = 79, key function = hr)

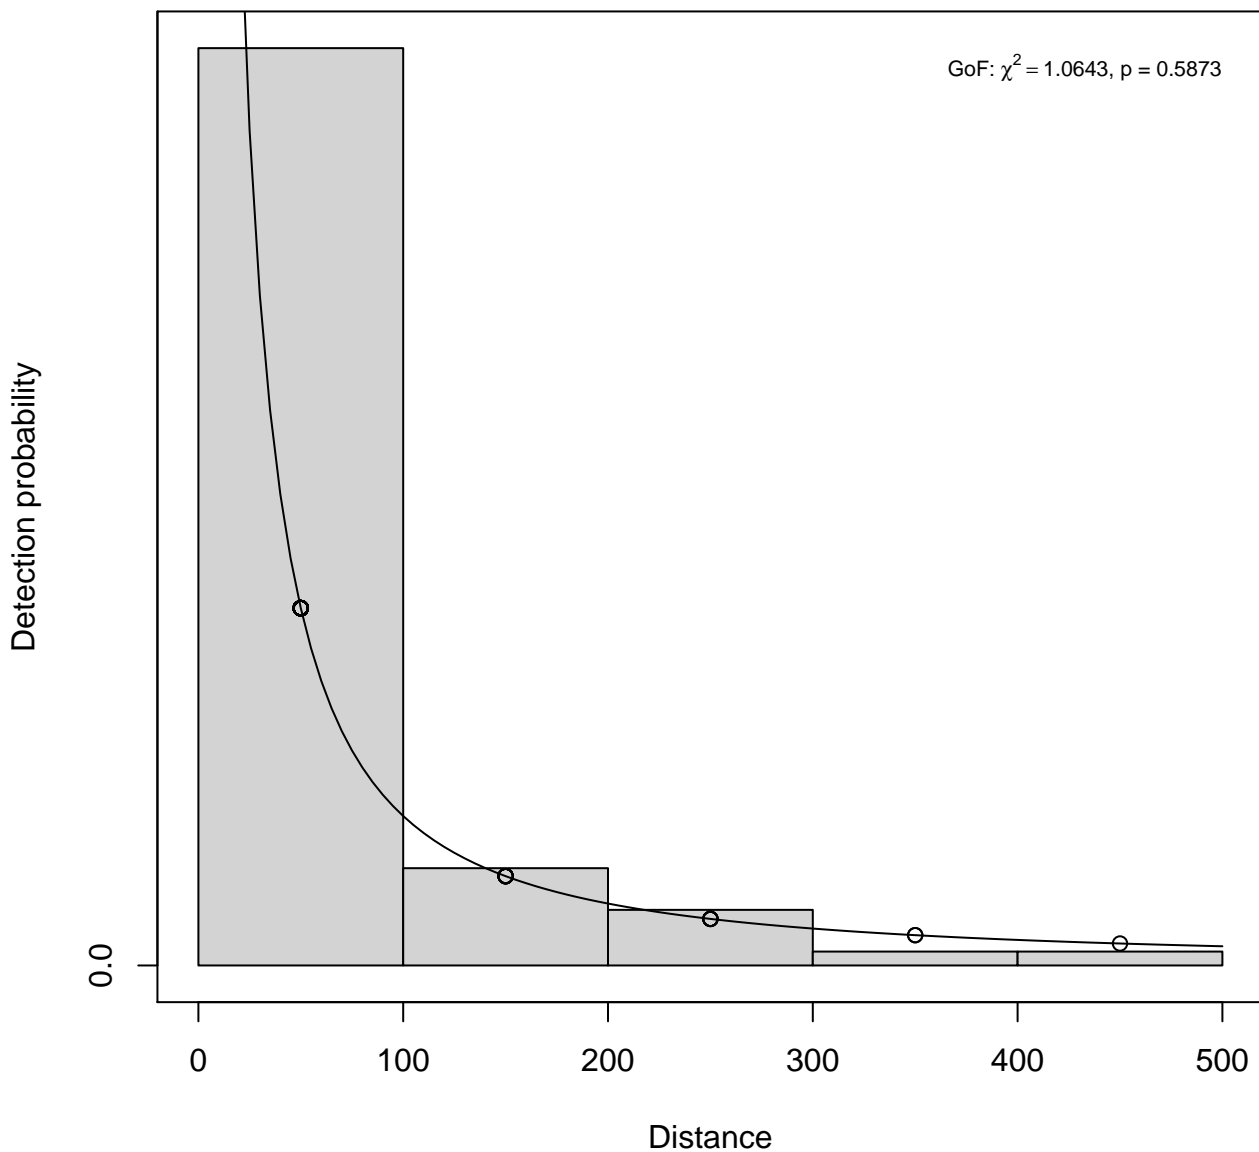

Cyanoliseus patagonus – High Monte – Argentina (N = 79, key function = hr)

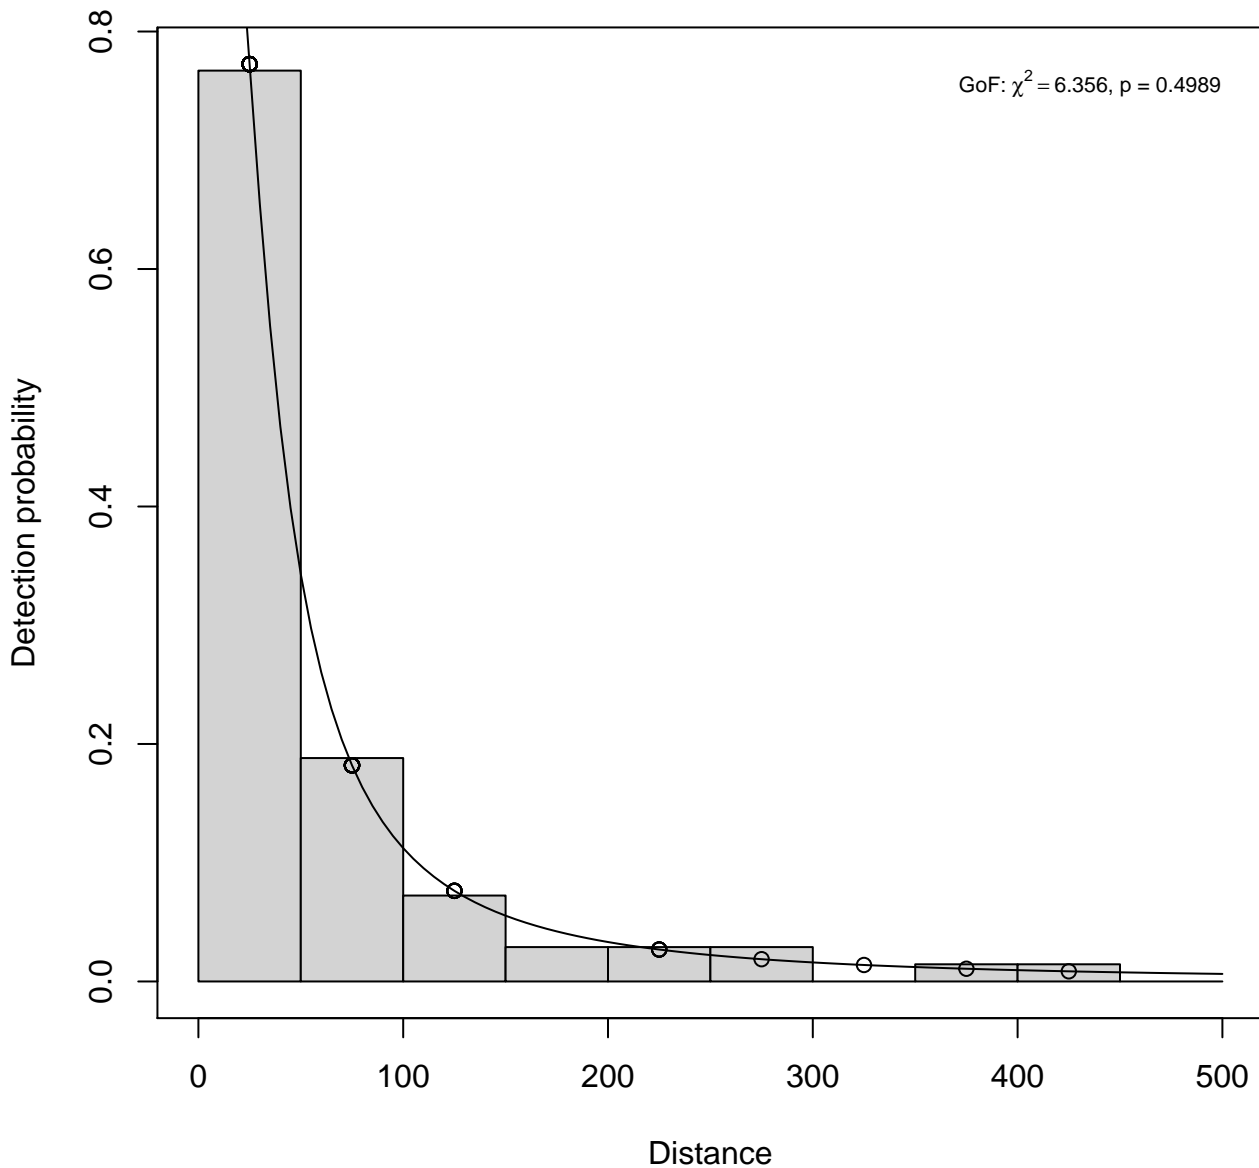

Cyanoliseus patagonus – High Monte – Argentina (N = 79, key function = hr)

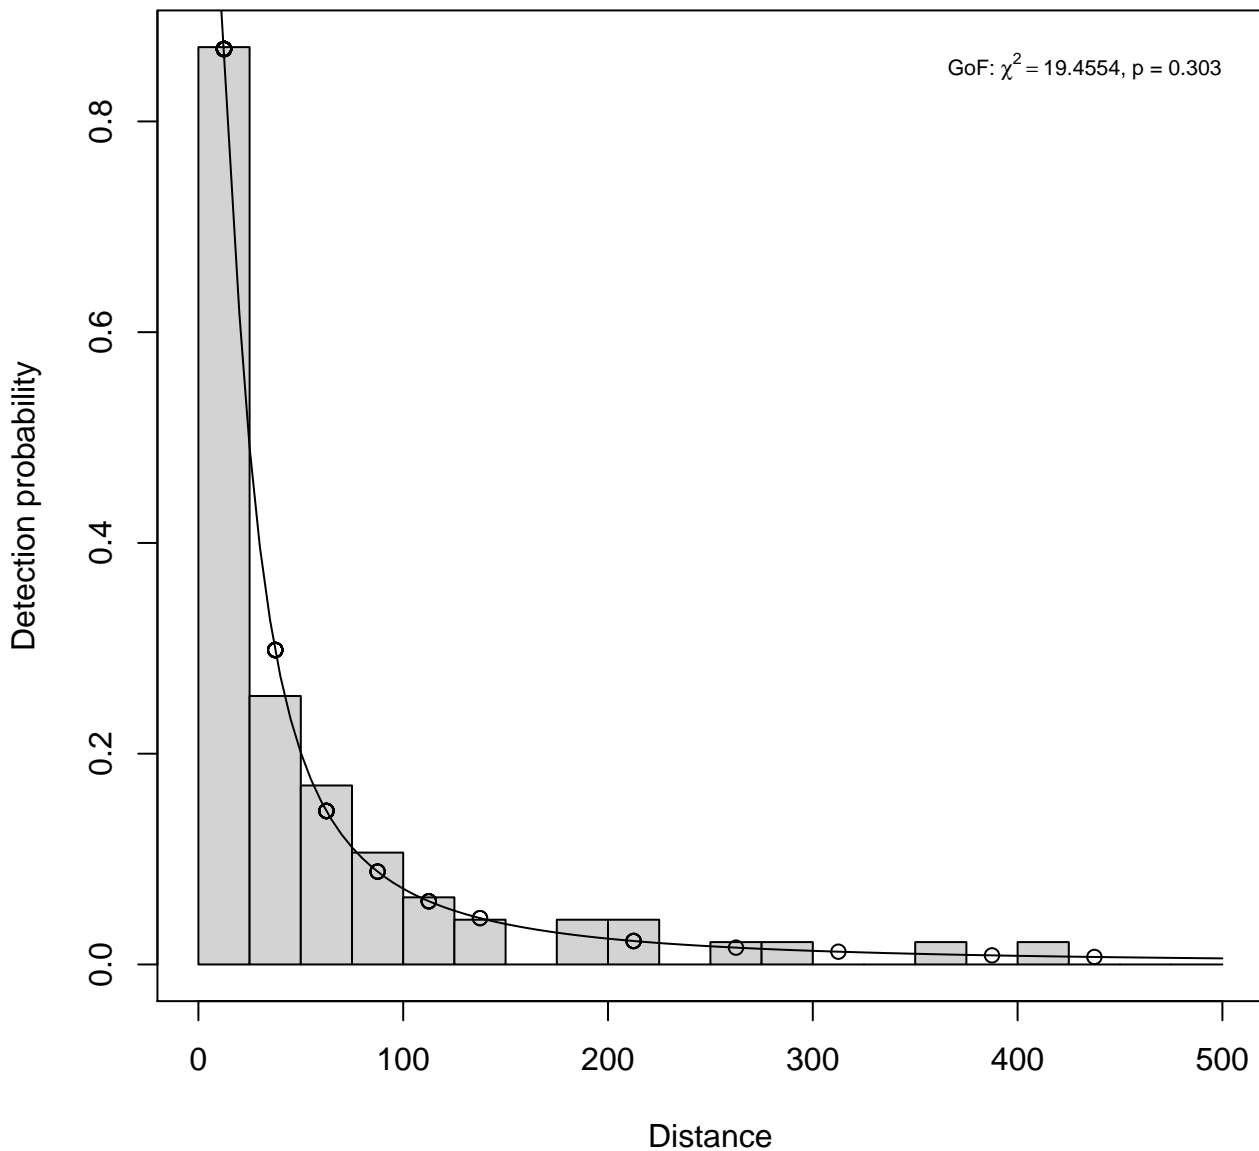

Supplement: s1 [file s1]
