# Supplementary material
Source: MDPI journal article supplement (https://www.mdpi.com/1424-2818/13/7/300)

# **Pionus menstruus – Choco–Darian moist forests – Colombia**

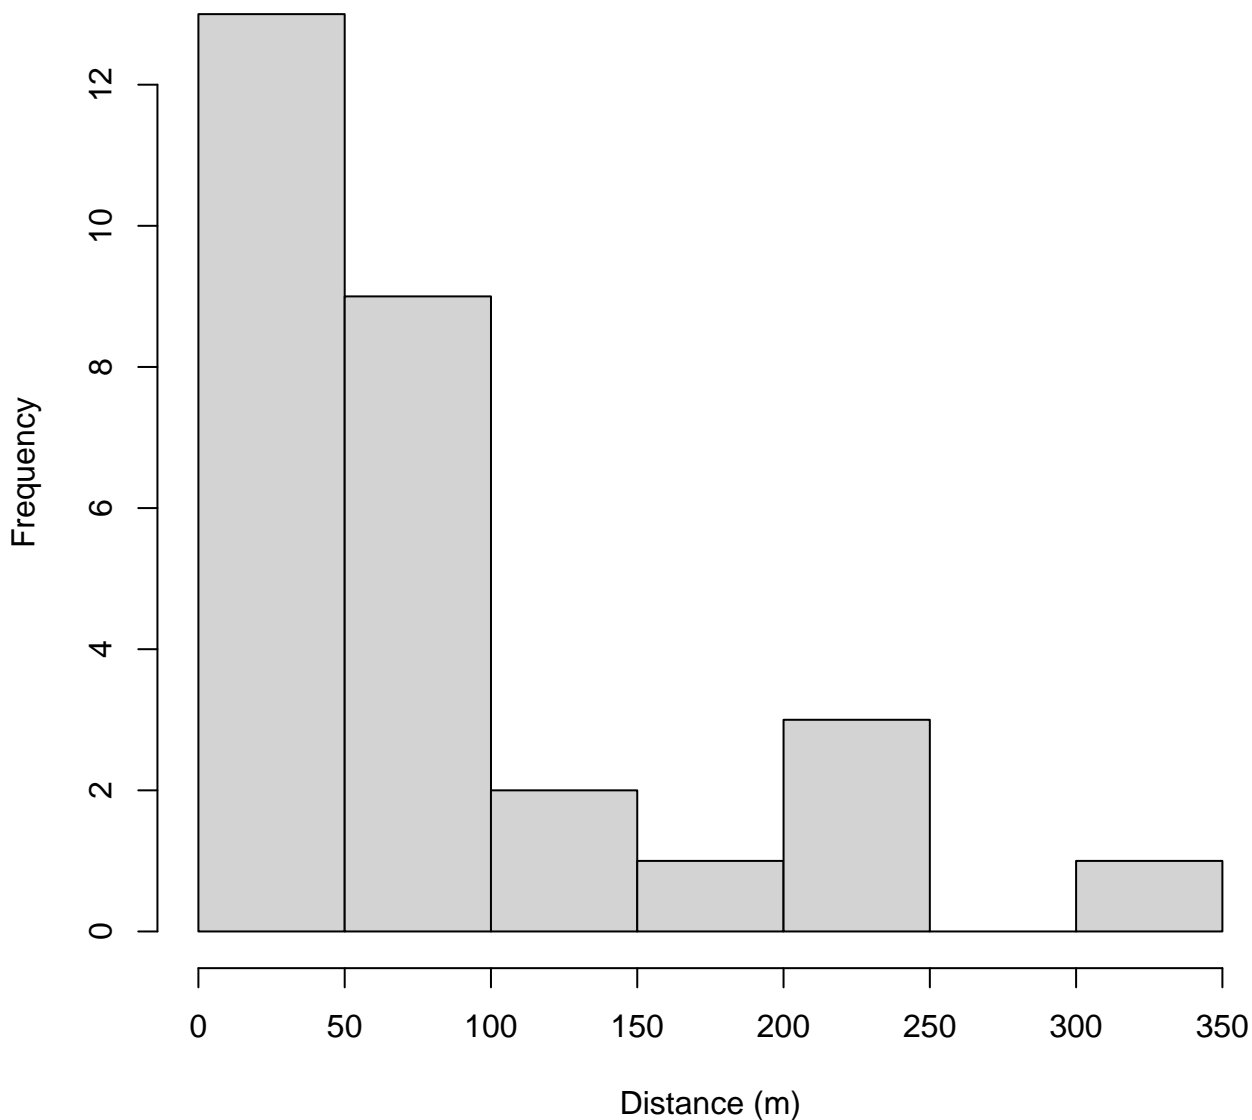

# Pionus menstruus – Choco–Darian moist forests – Colombia

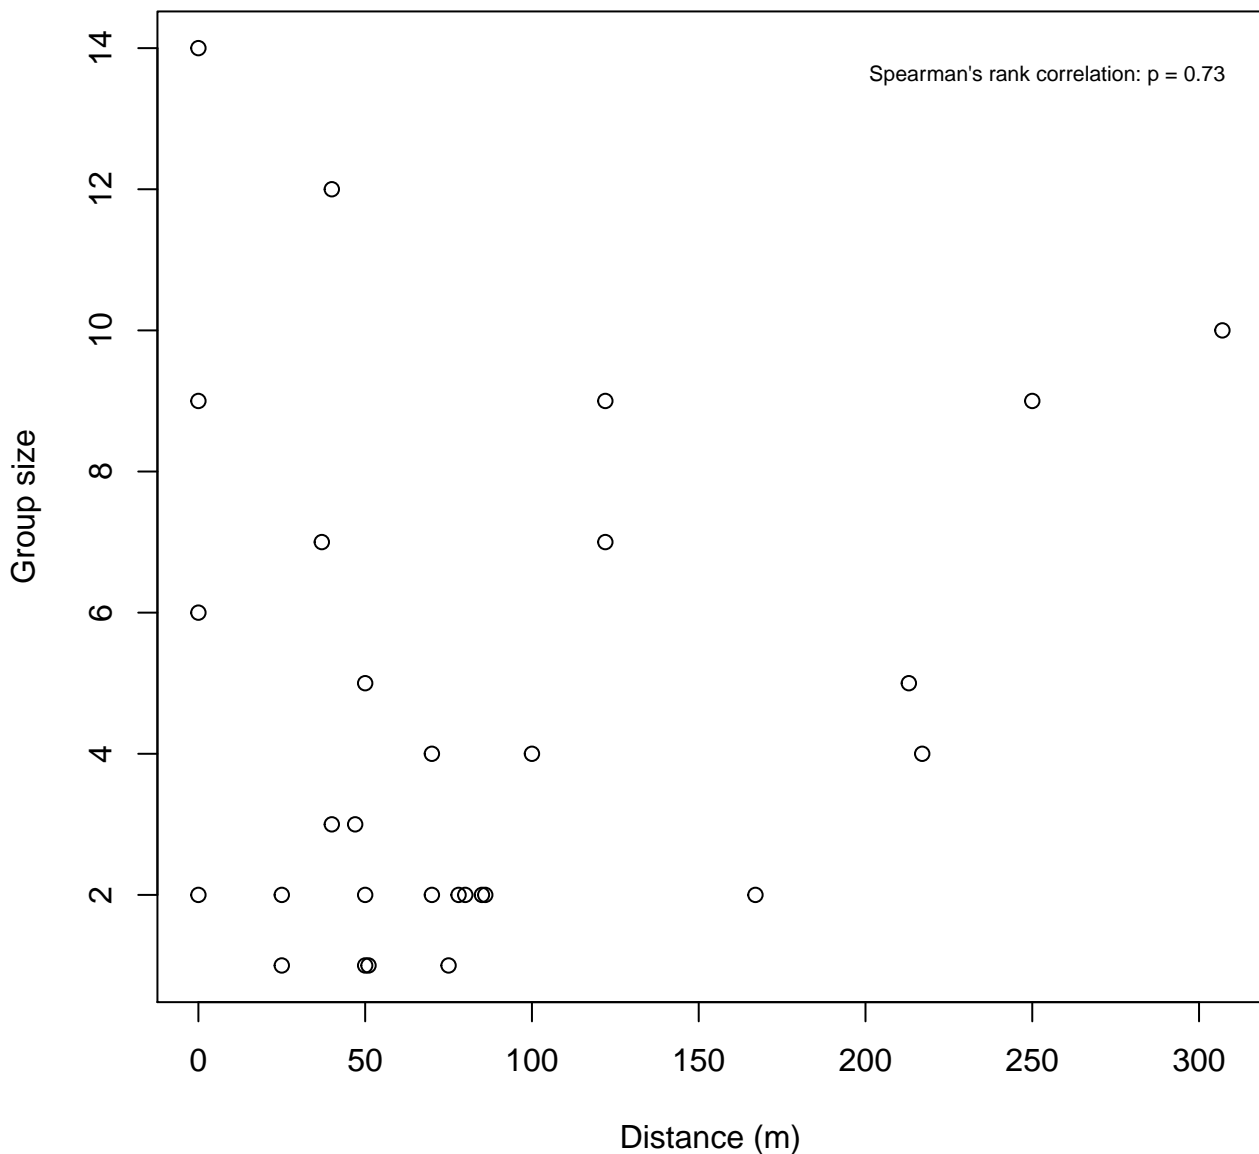

Pionus menstruus – Choco–Darian moist forests – Colombia (N = 29, key function = hr)

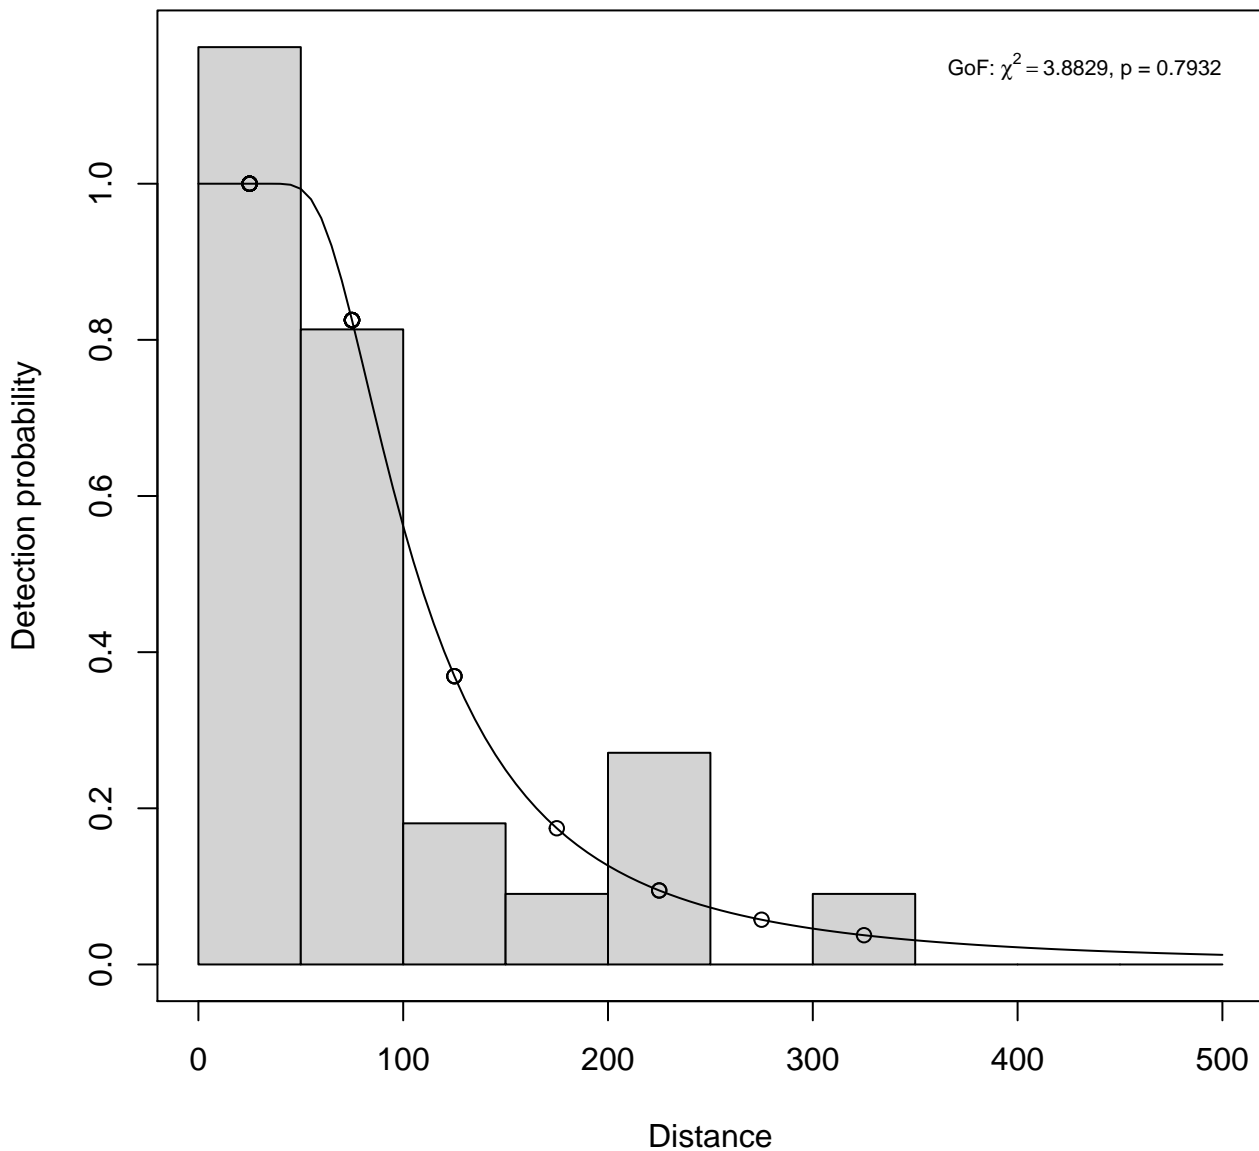

*Pionus menstruus* – Choco–Darian moist forests – Colombia (N = 29, key function = hr)

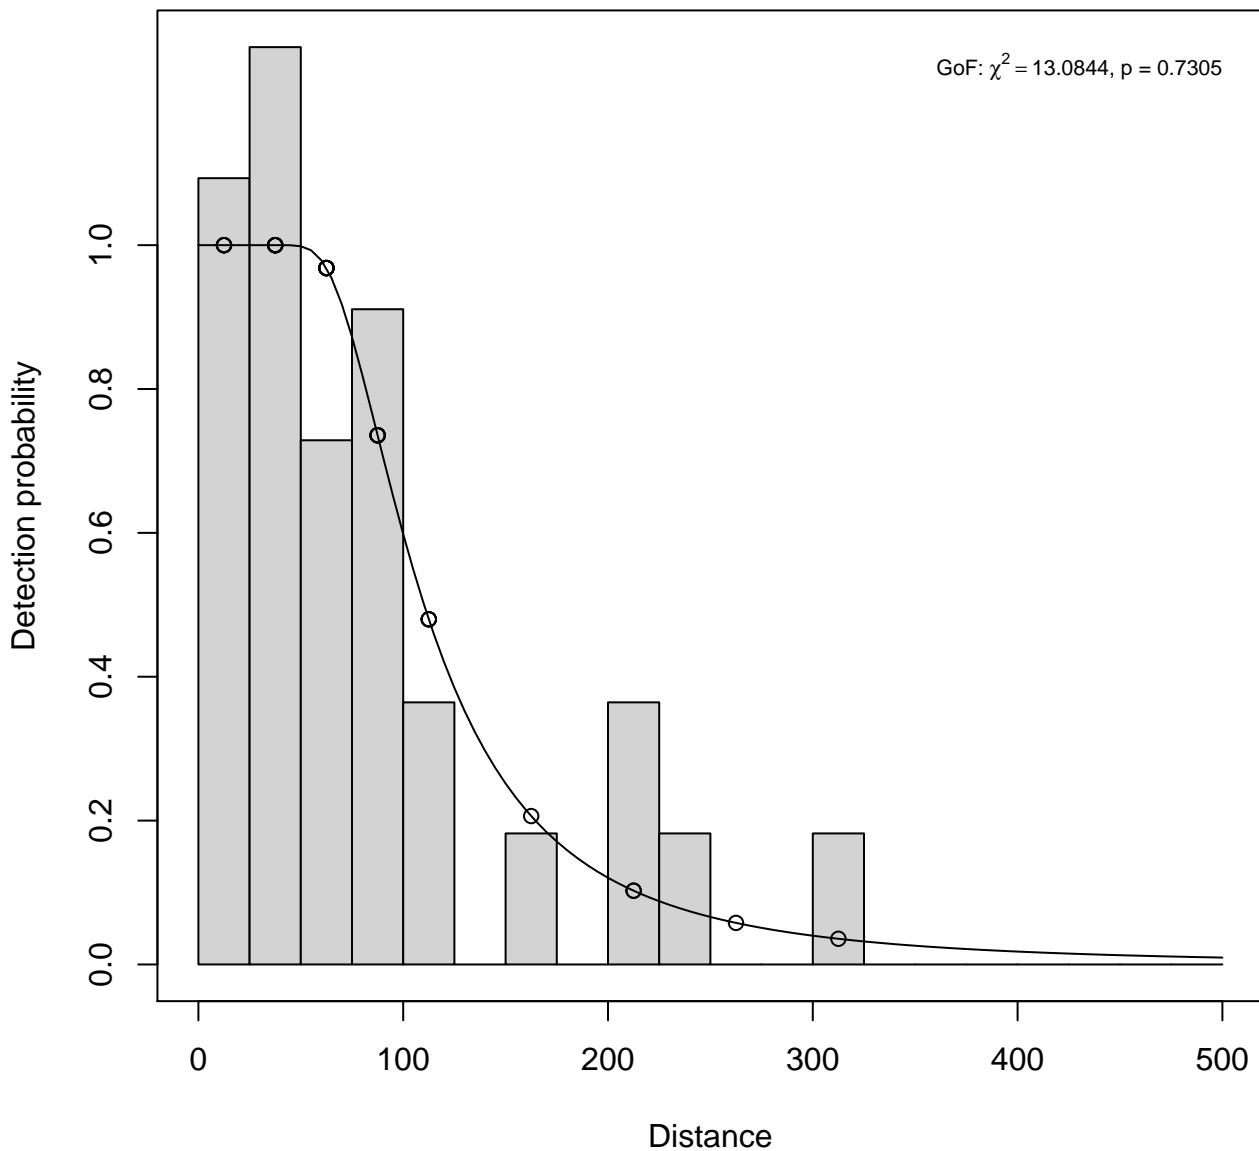

*Pionus menstruus* – Choco–Darian moist forests – Colombia (N = 29, key function = hr)

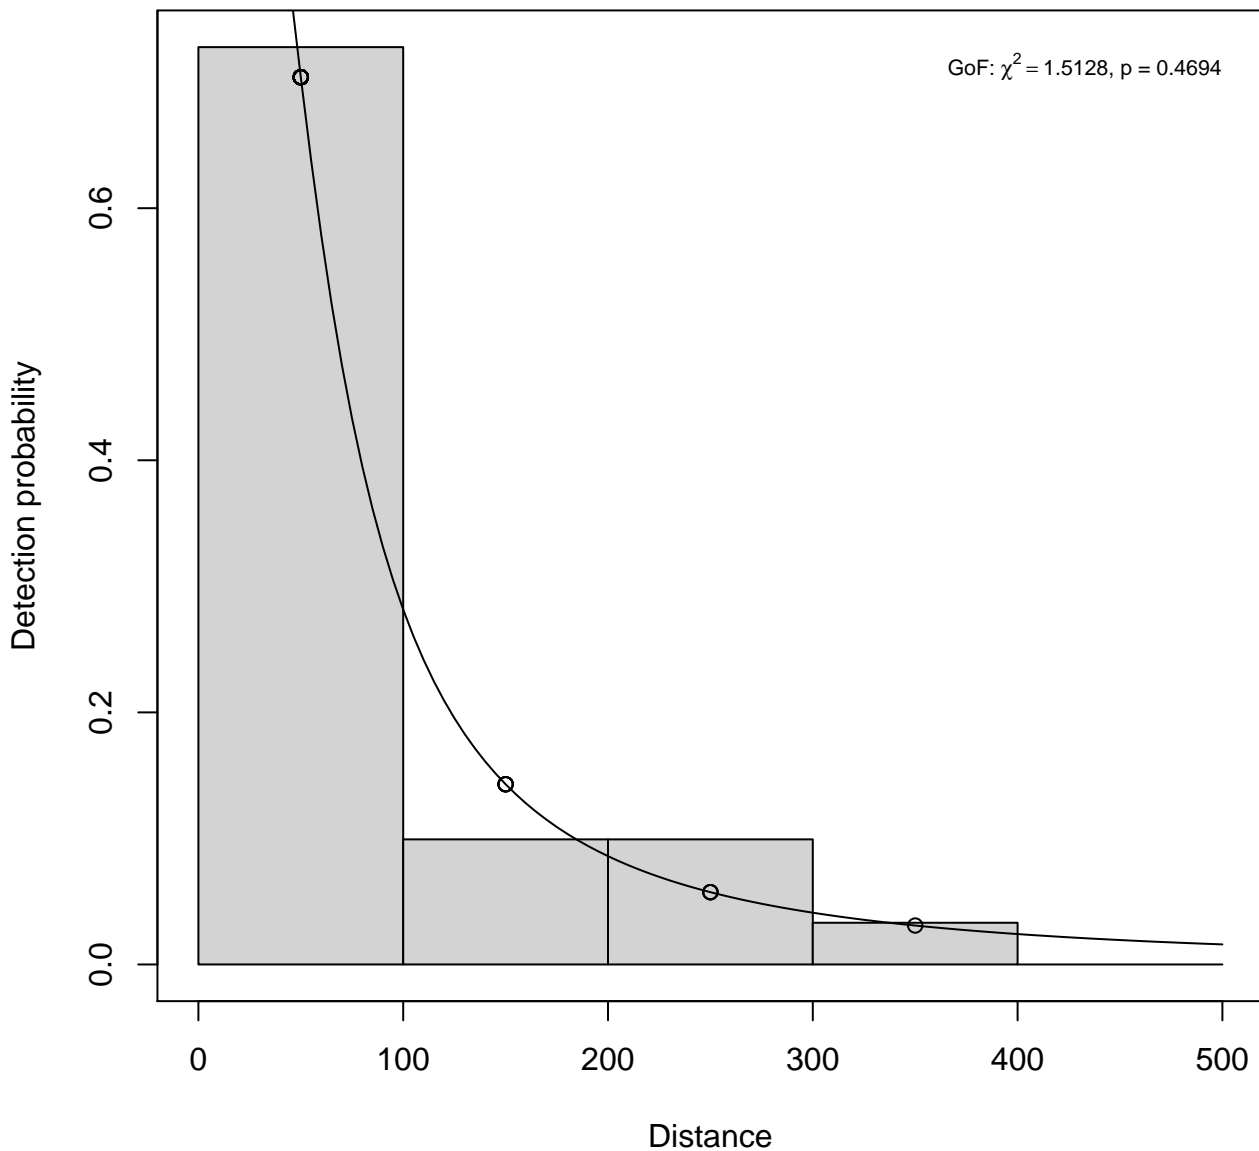

Supplement: s1 [file s1]
