# Supplementary material
Source: MDPI journal article supplement (https://www.mdpi.com/1424-2818/13/7/300)

# **Ara severus – Southwest Amazon moist forests – Peru**

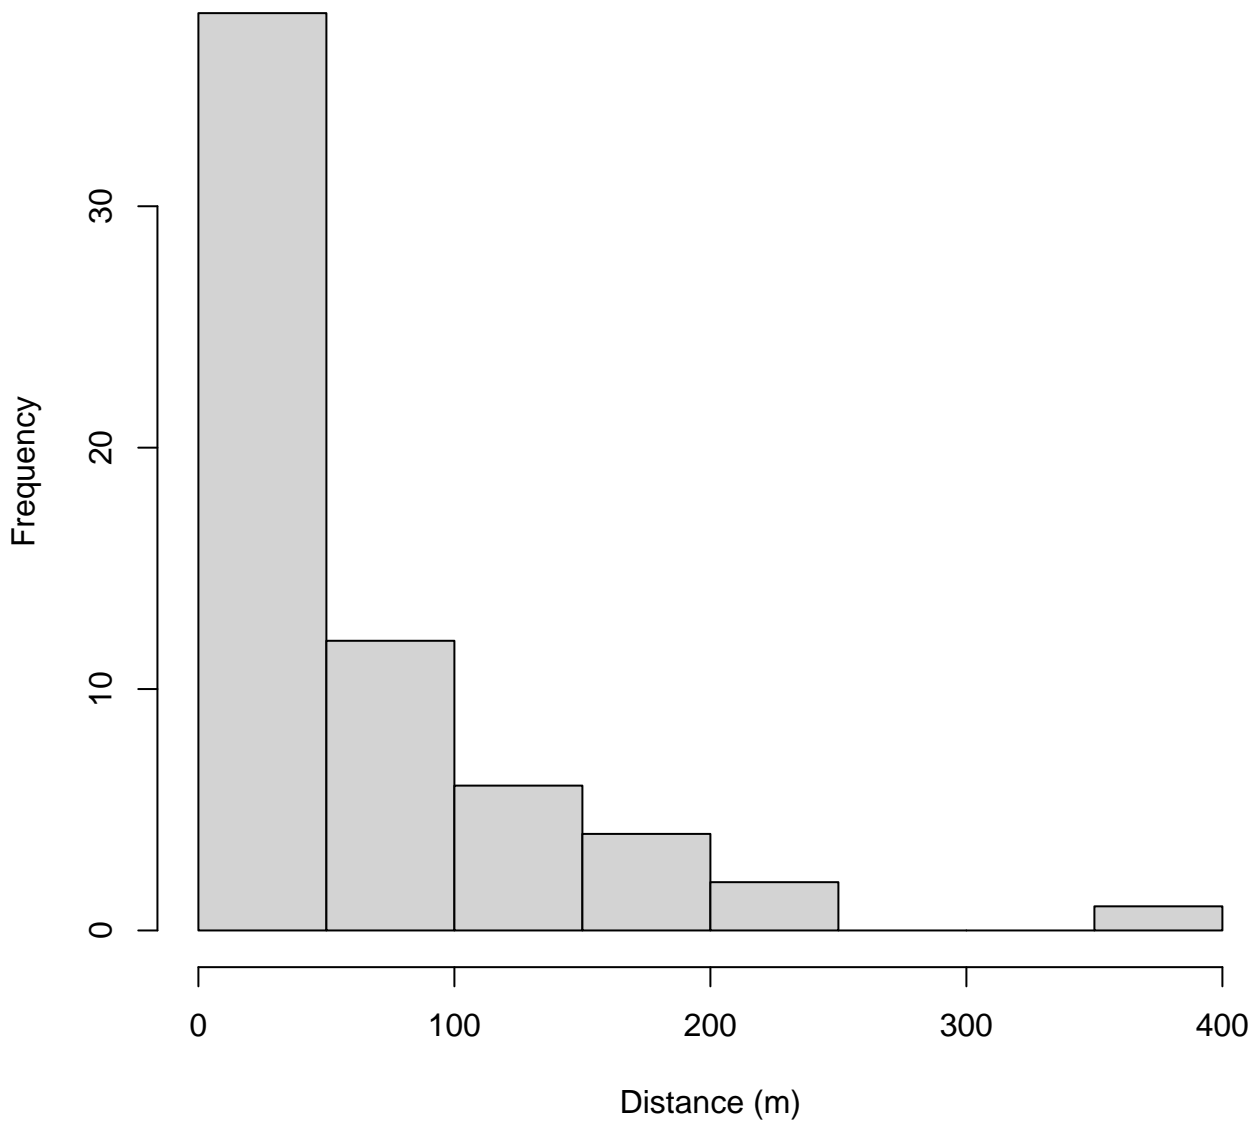

# **Ara severus – Southwest Amazon moist forests – Peru**

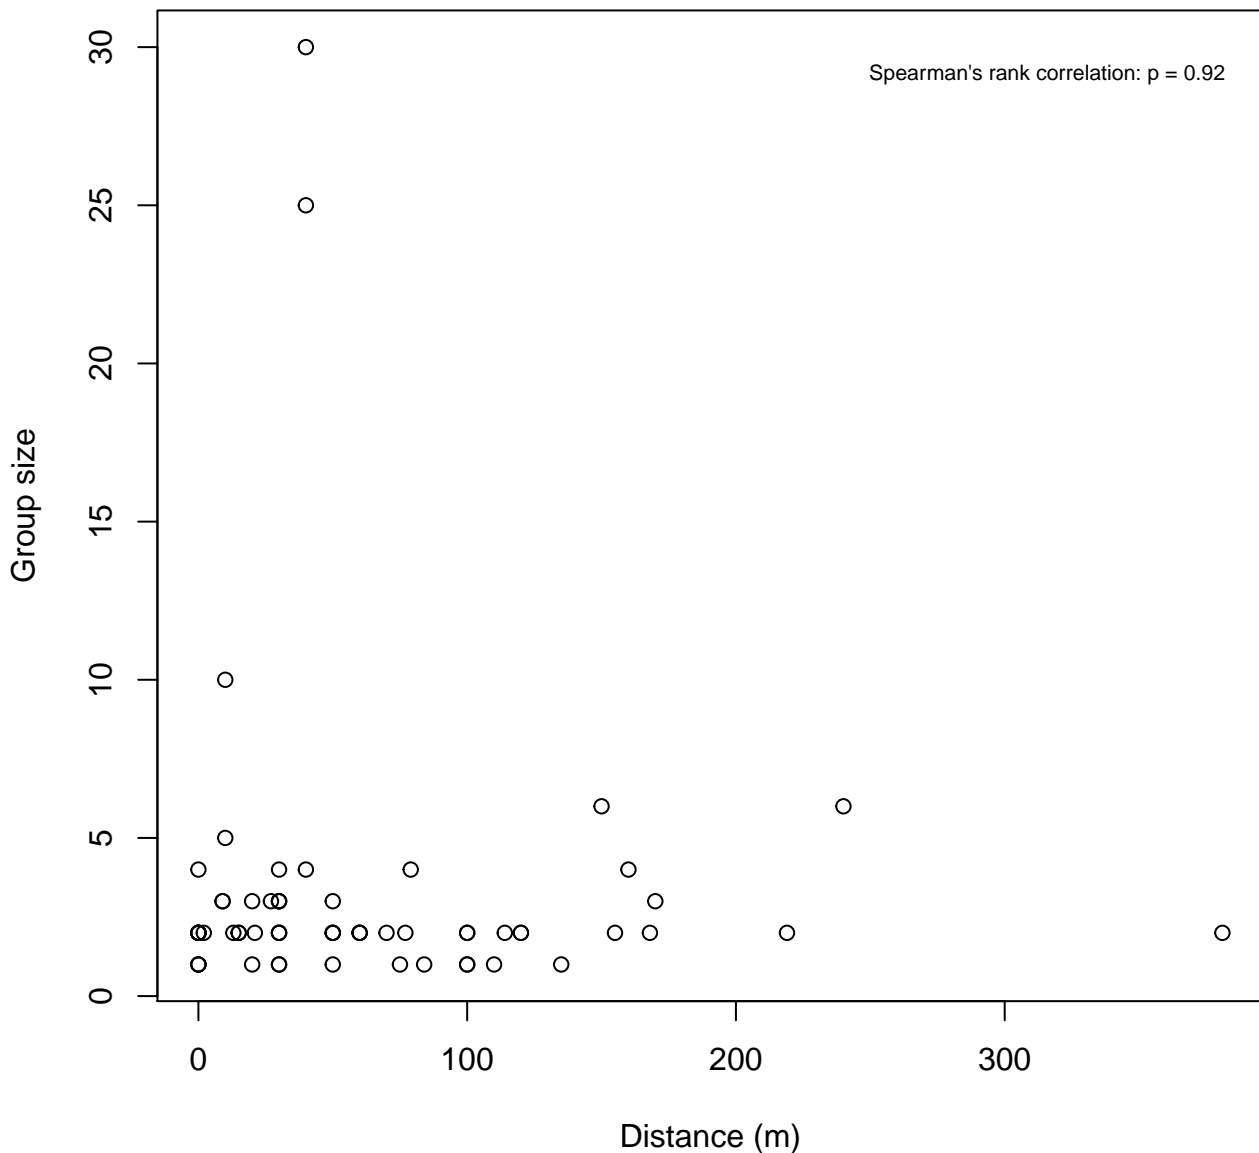

*Ara severus* – Southwest Amazon moist forests – Peru (N = 63, key function = hn)

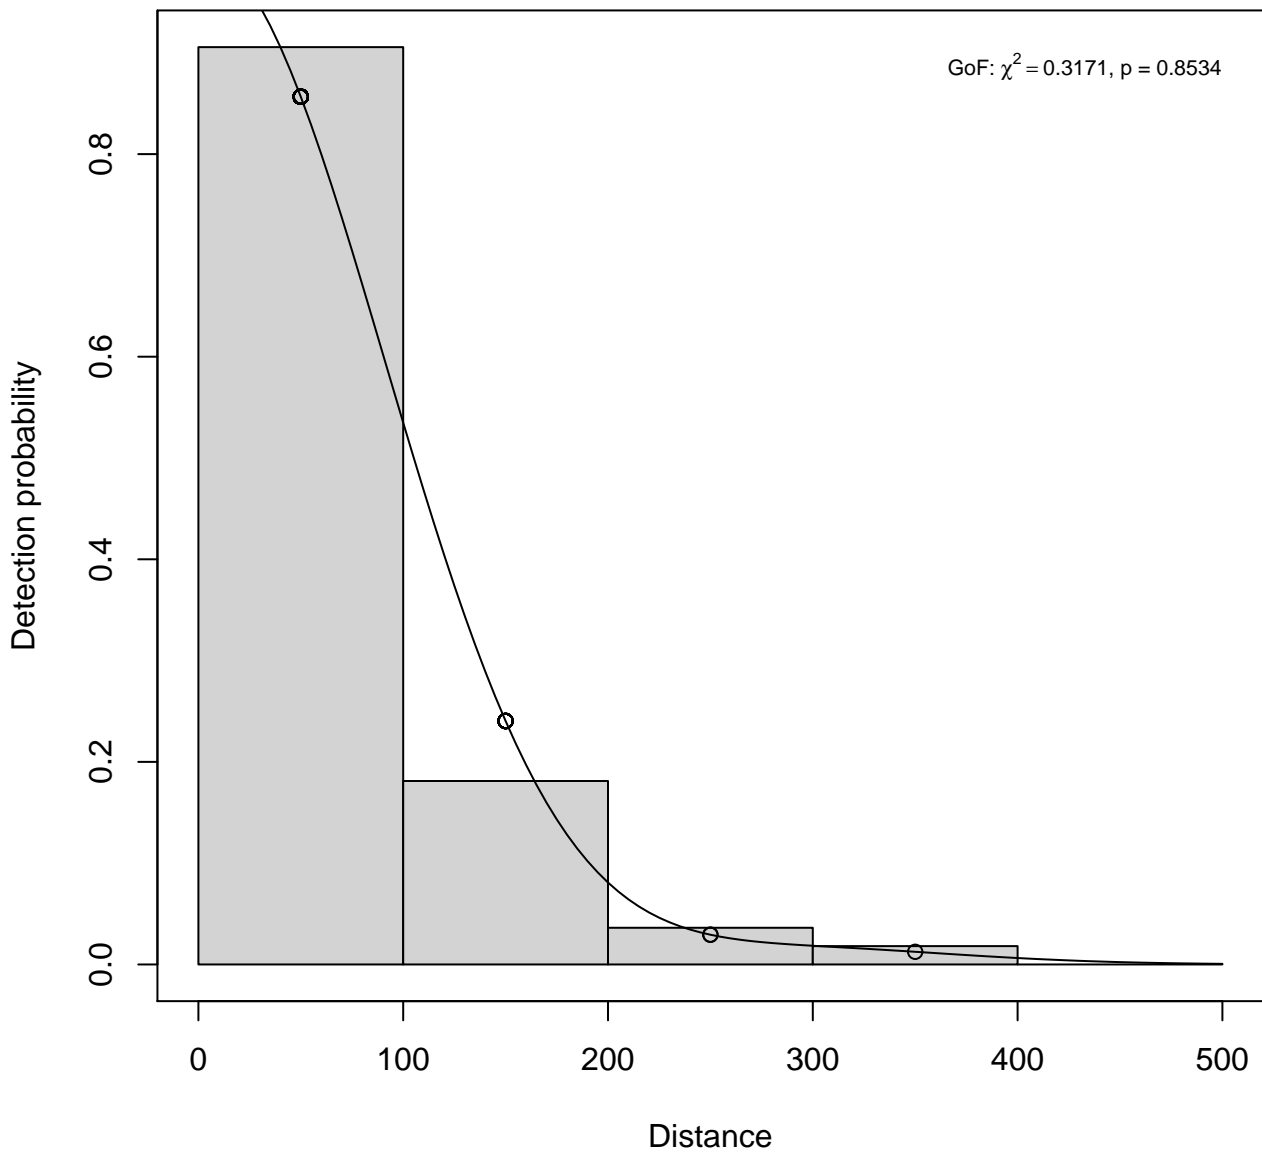

*Ara severus* – Southwest Amazon moist forests – Peru (N = 63, key function = hn)

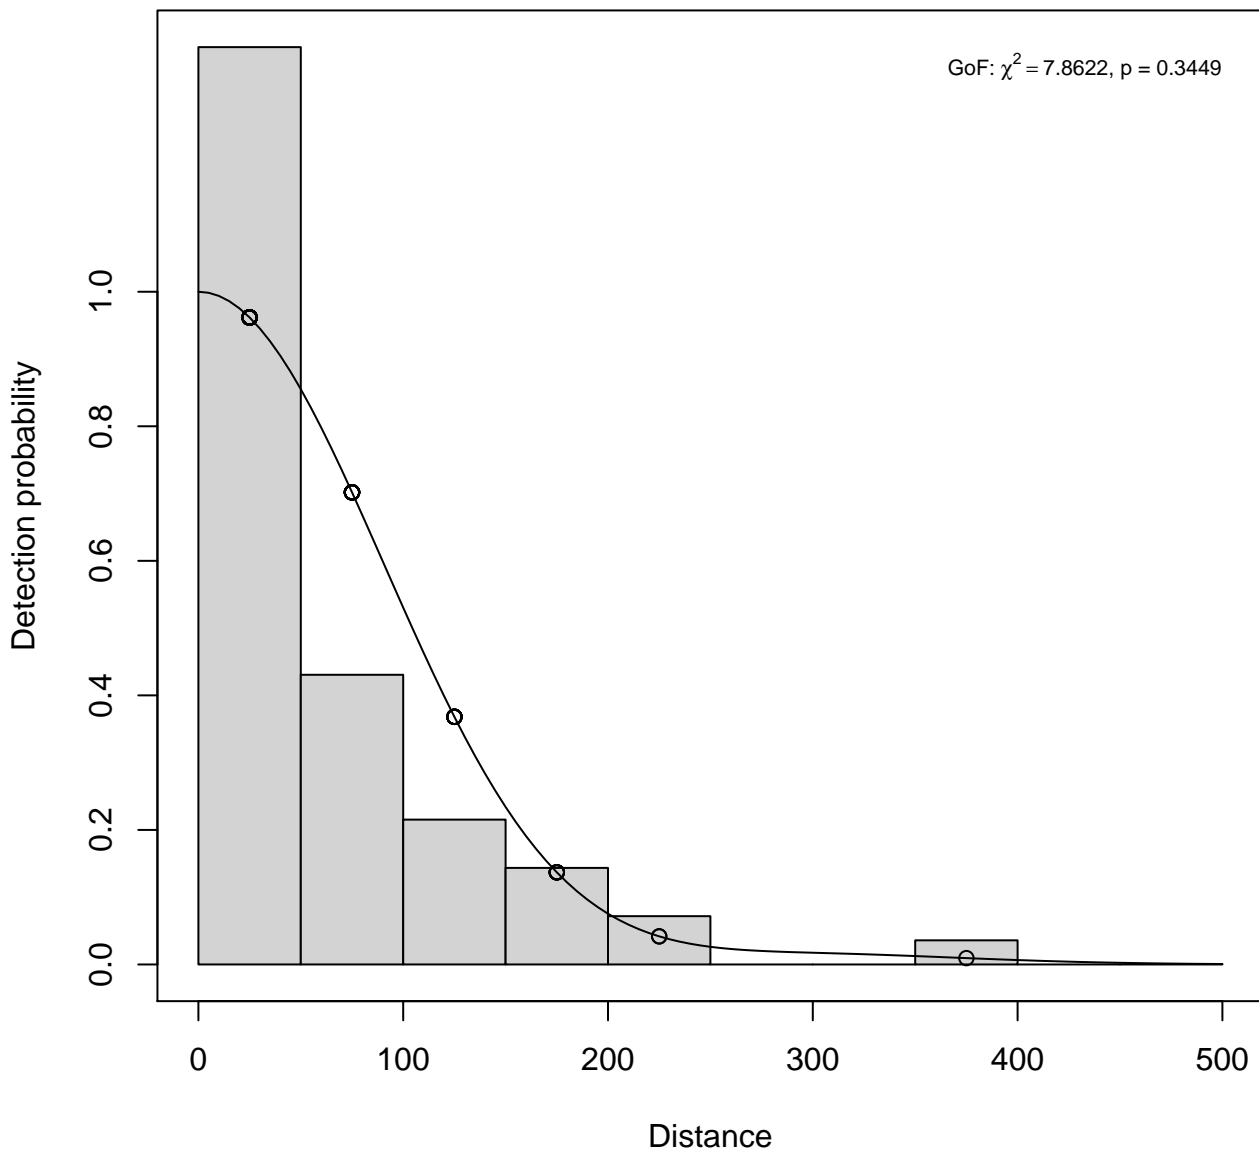

*Ara severus* – Southwest Amazon moist forests – Peru (N = 63, key function = hn)

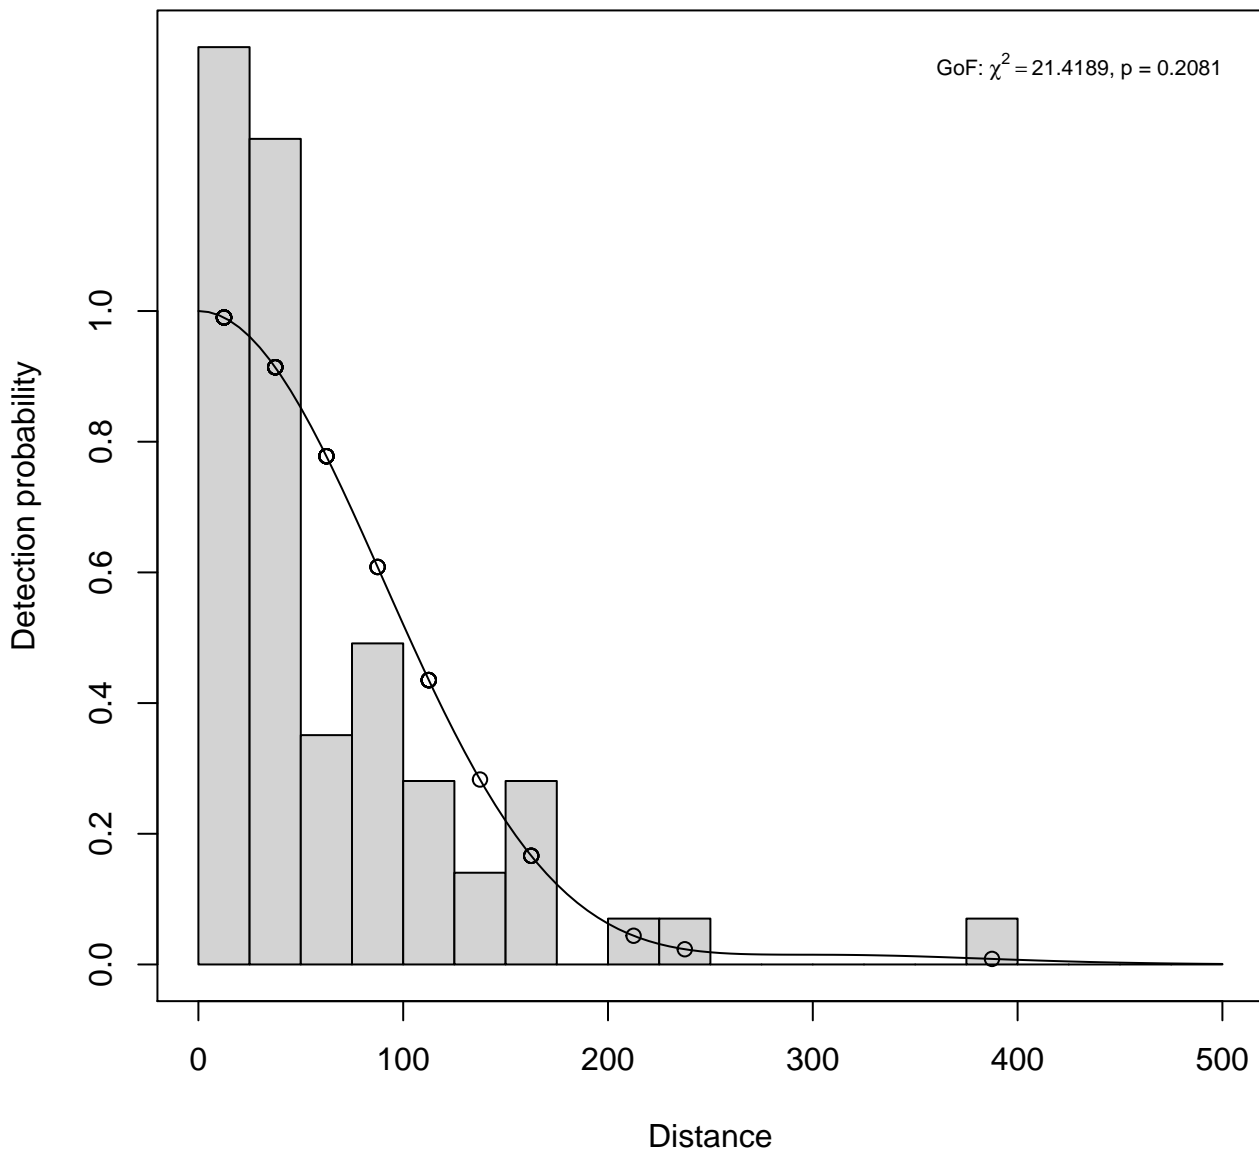

Supplement: s1 [file s1]
