# Supplementary material
Source: MDPI journal article supplement (https://www.mdpi.com/1424-2818/13/7/300)

# **Eupsittula pertinax – Southern Mesoamerican Pacific mangroves – Panama**

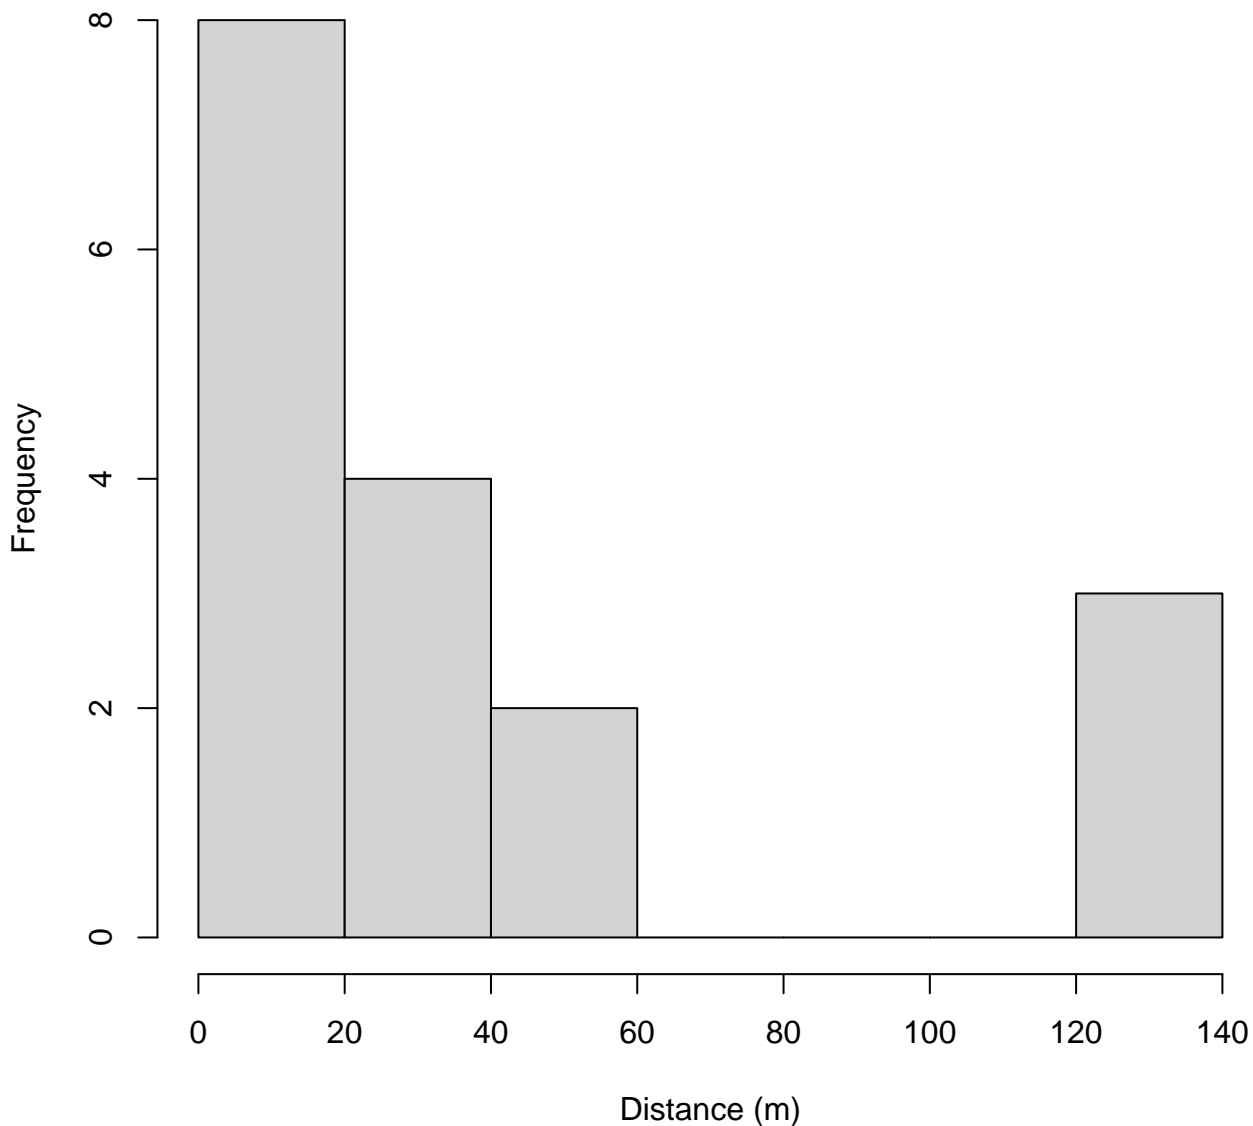

# **Eupsittula pertinax – Southern Mesoamerican Pacific mangroves – Panama**

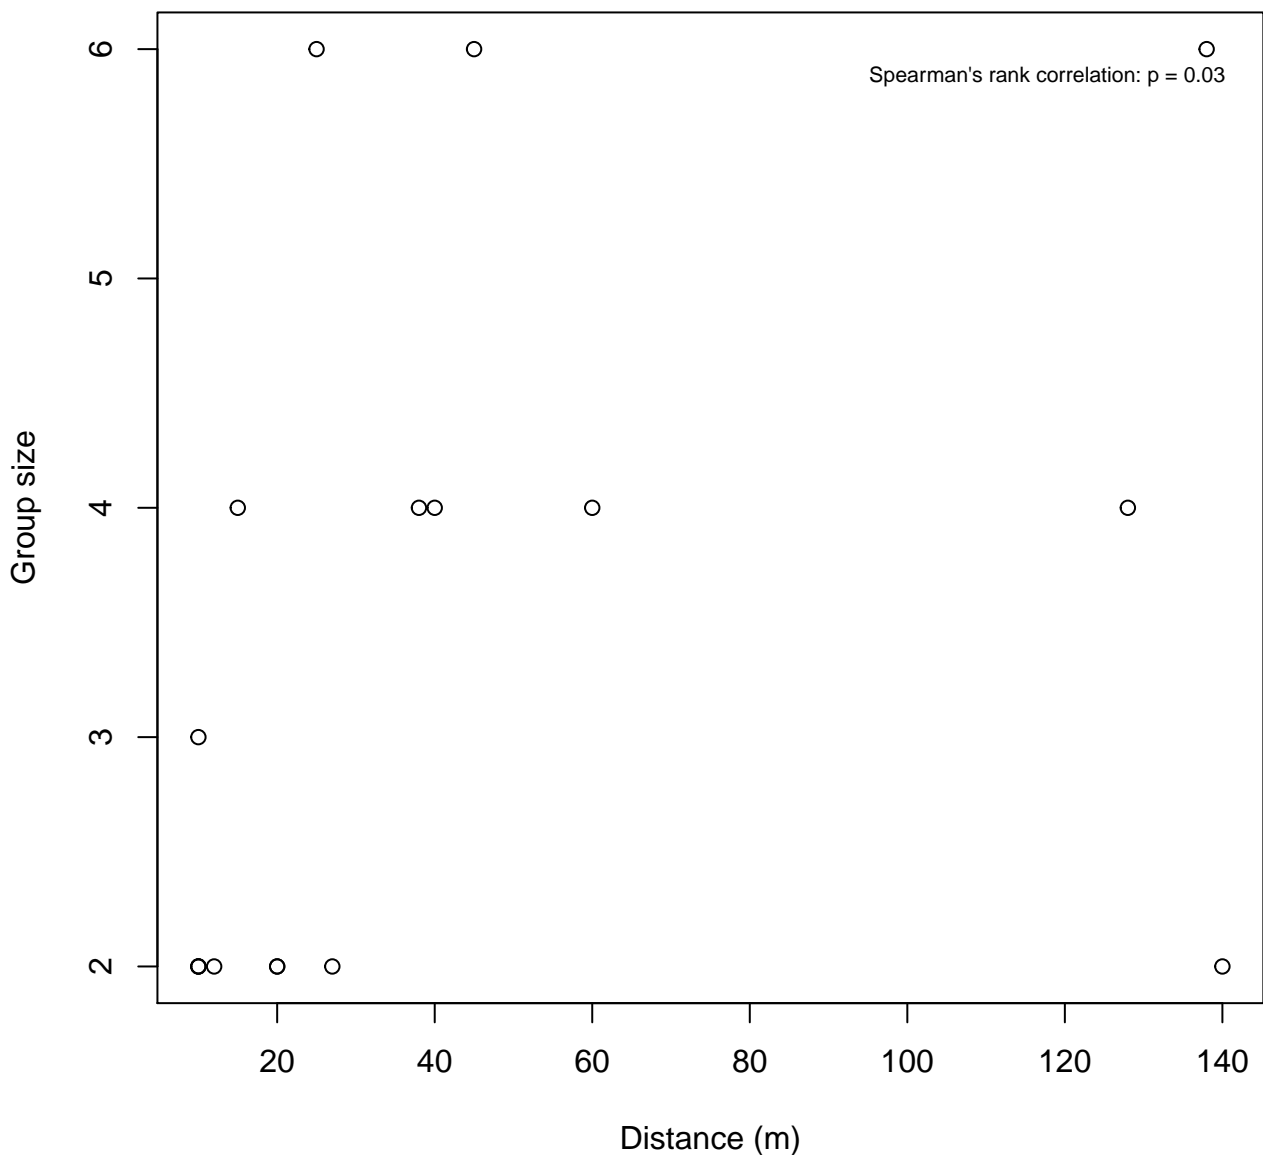

*Eupsittula pertinax* – Southern Mesoamerican Pacific mangroves – Panama (N = 17, key function = hn)

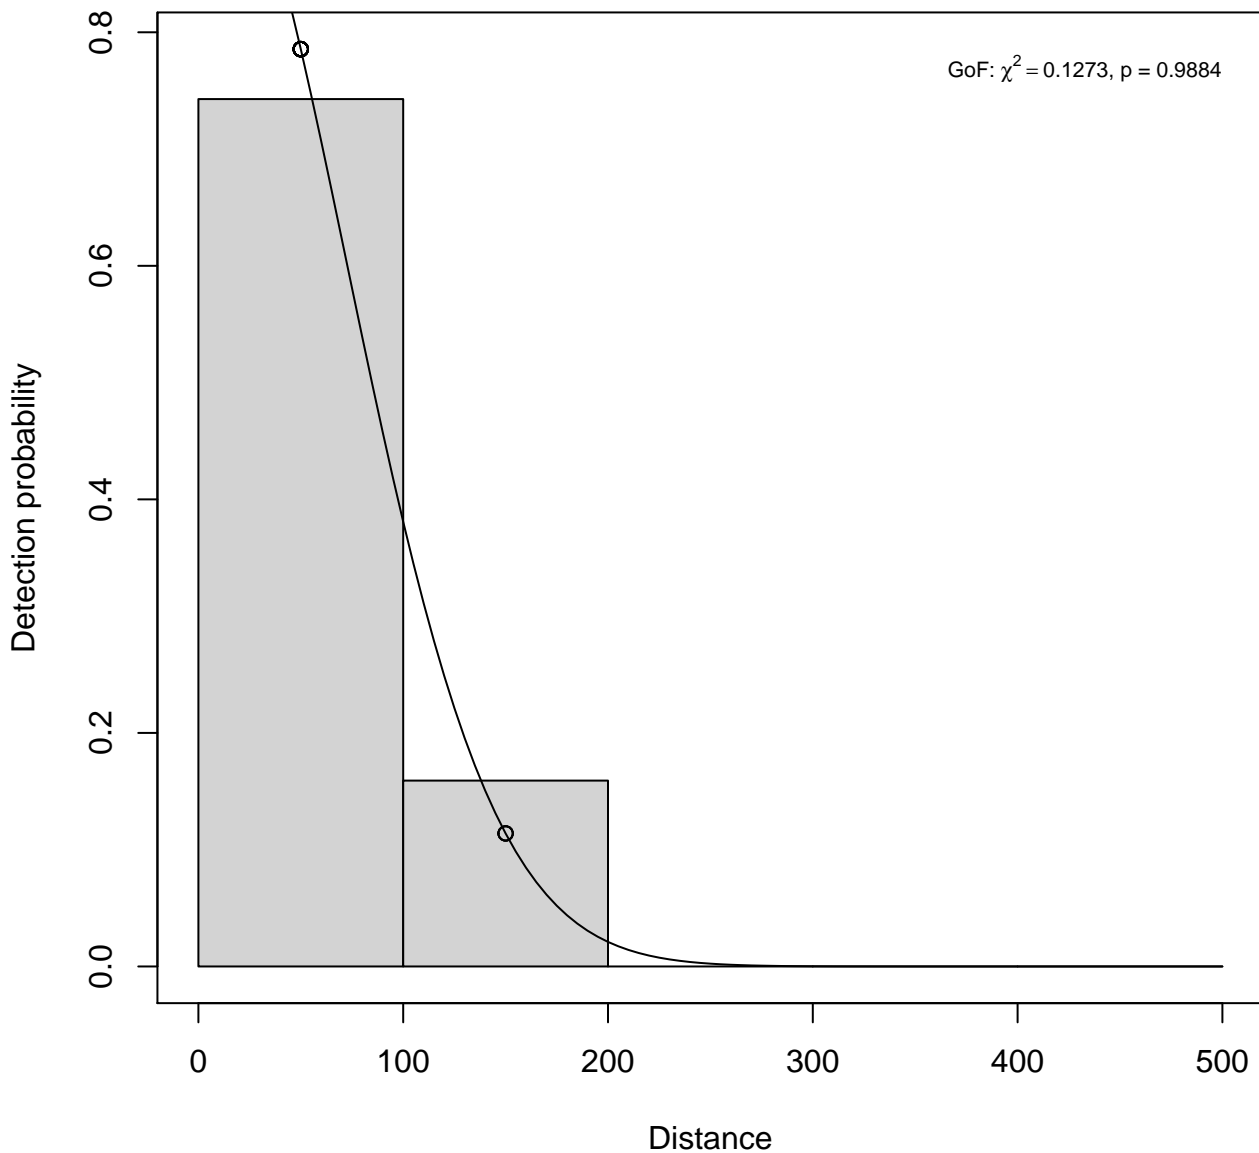

Eupsittula pertinax – Southern Mesoamerican Pacific mangroves – Panama (N = 17, key function = hn)

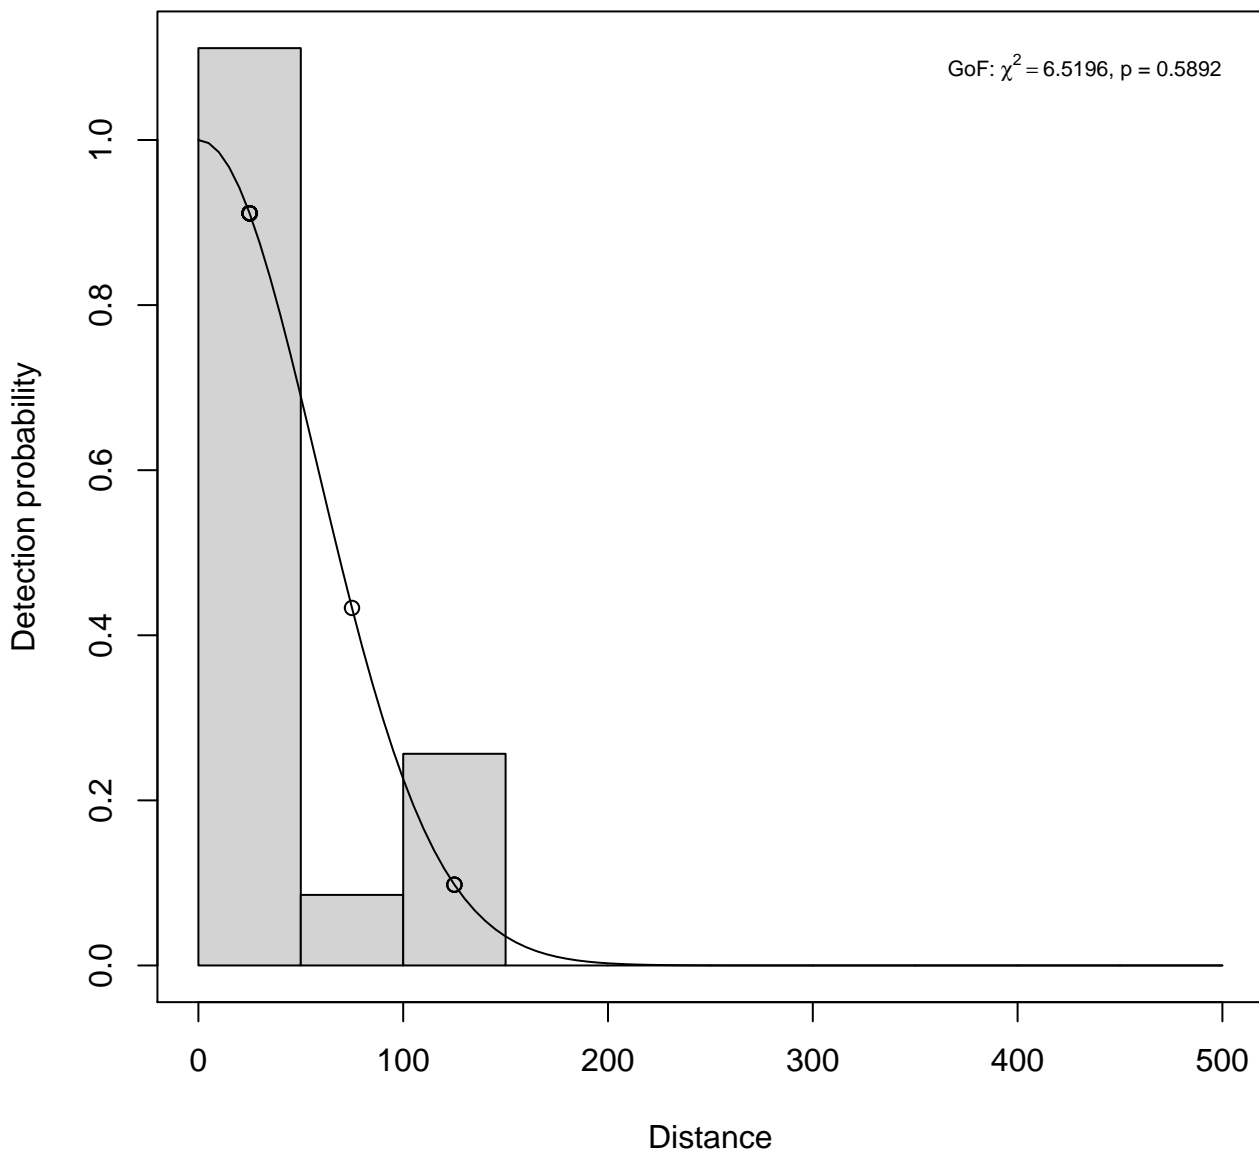

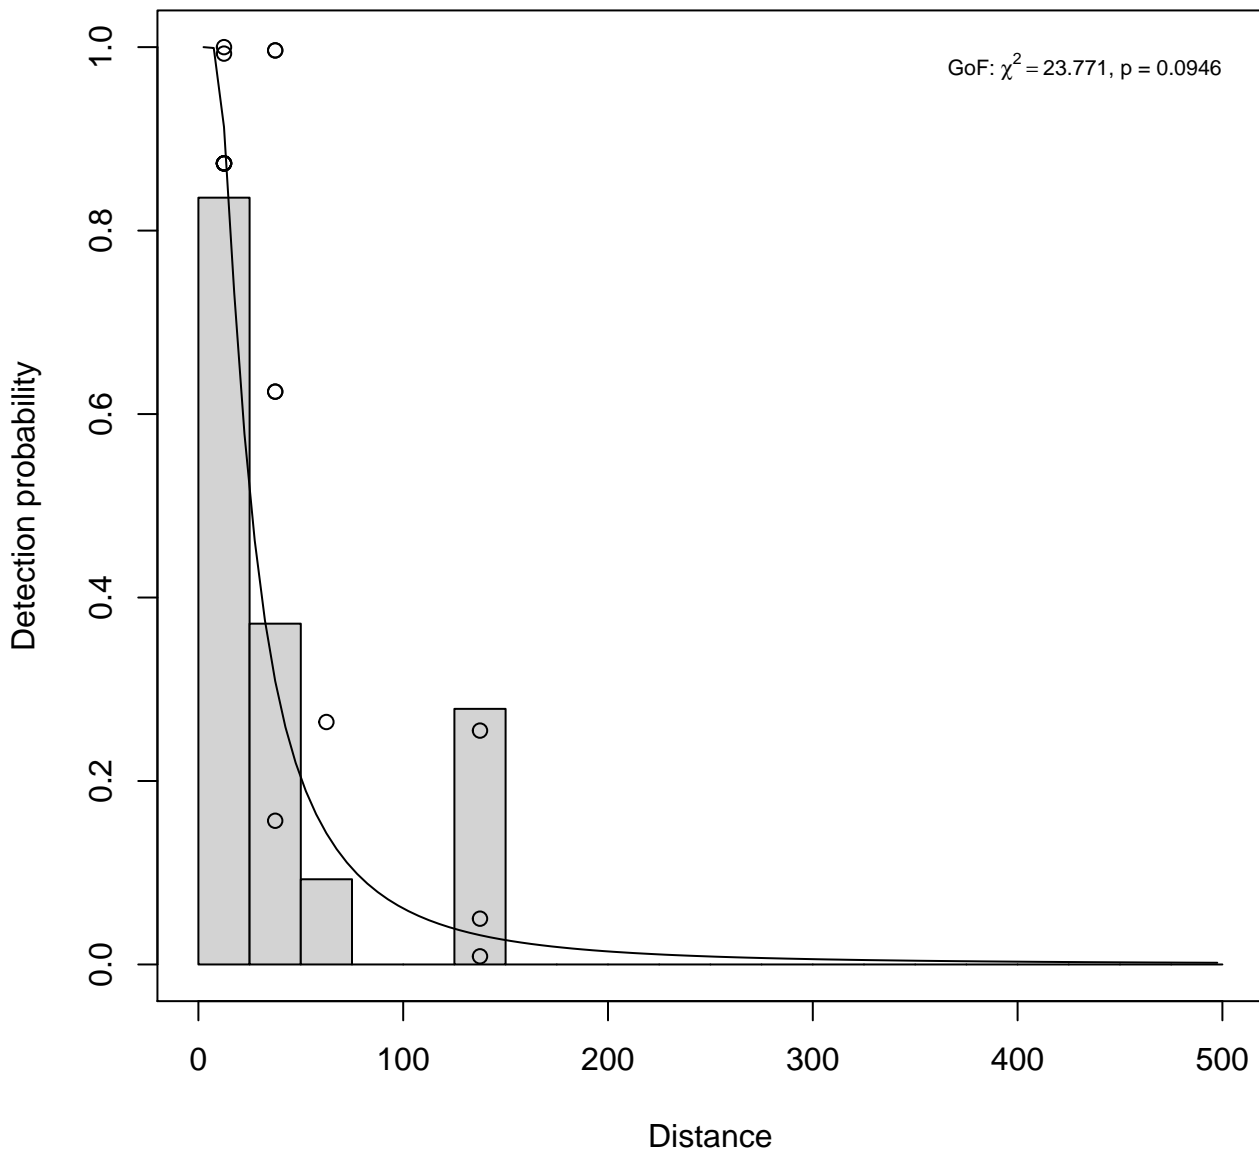

Supplement: s1 [file s1]
