# Supplementary material
Source: MDPI journal article supplement (https://www.mdpi.com/1424-2818/13/7/300)

# **Eupsittula pertinax – Guajira–Barranquilla xeric scrub – Colombia**

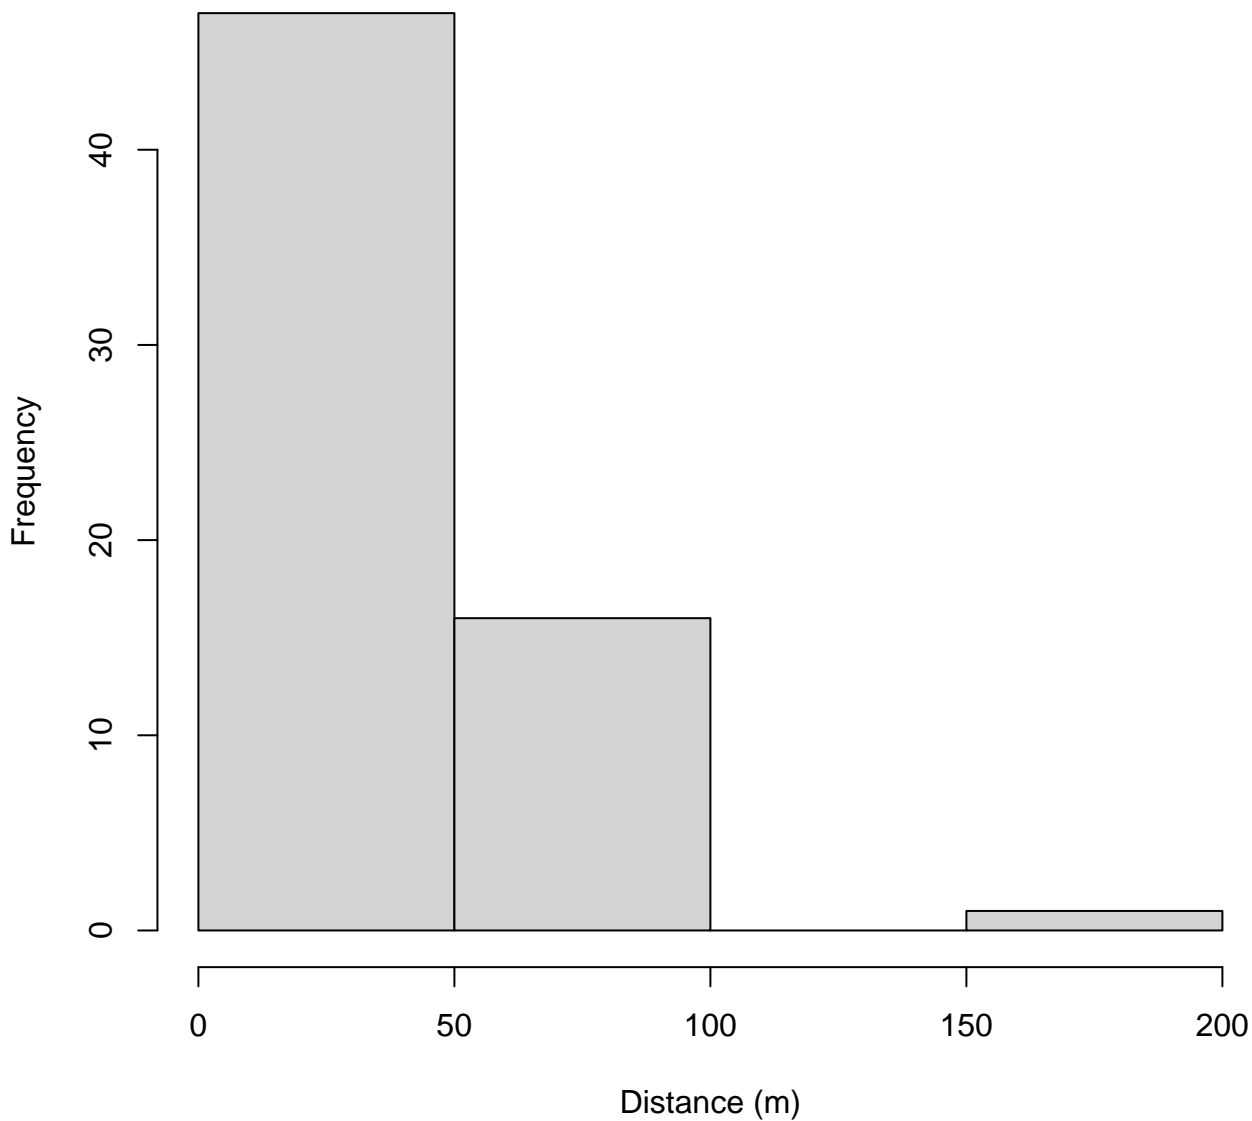

**Eupsittula pertinax – Guajira–Barranquilla xeric scrub – Colombia**

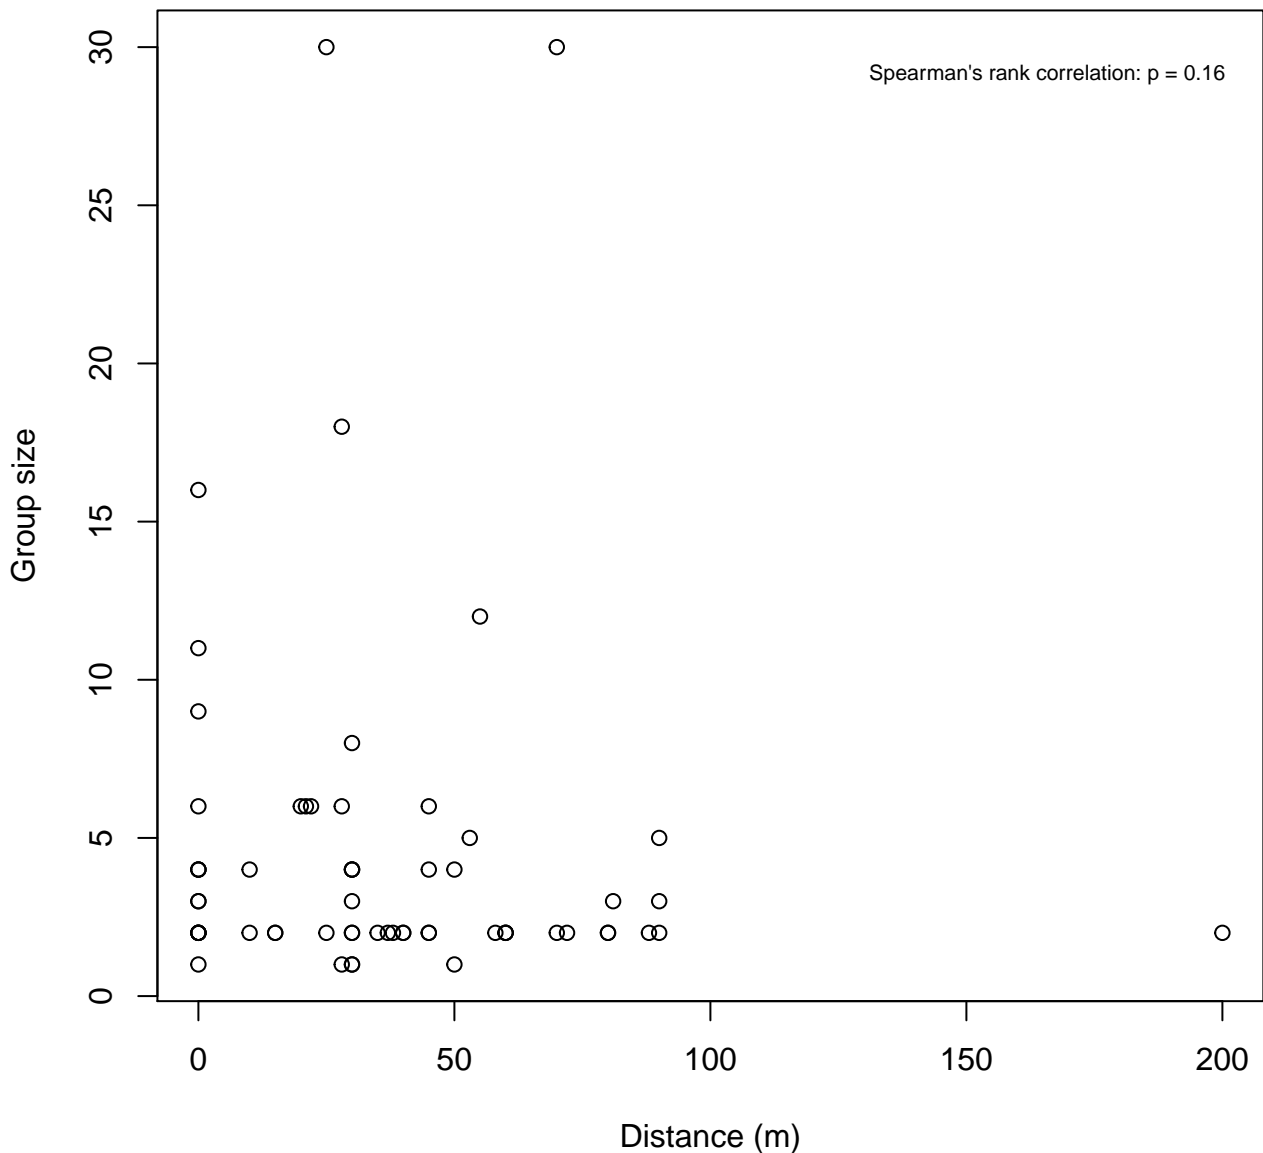

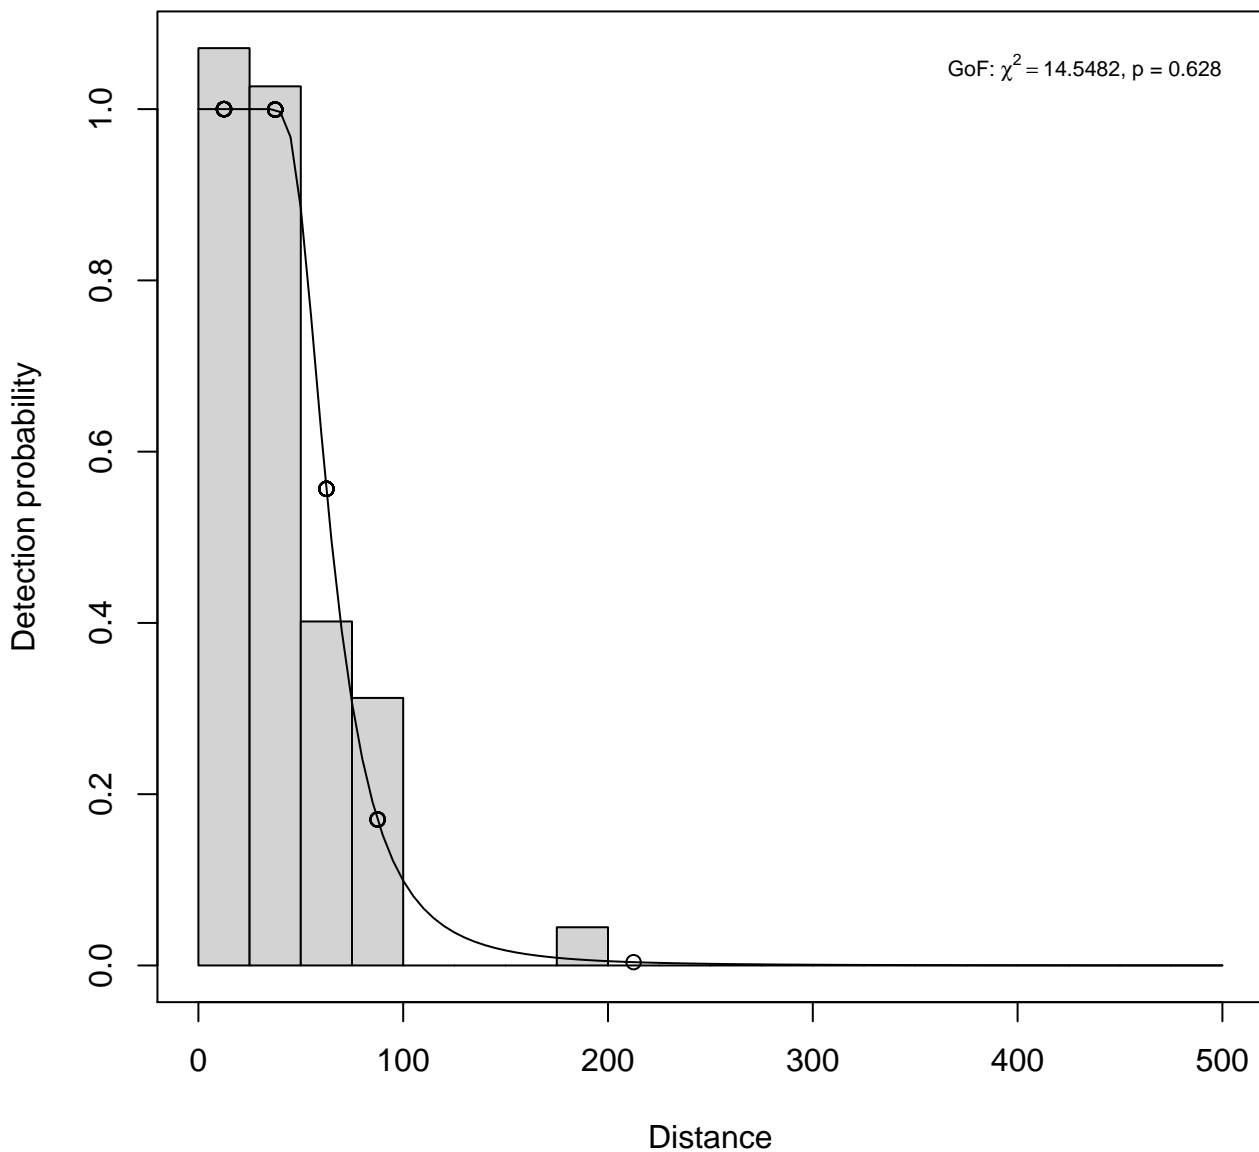

*Eupsittula pertinax* – Guajira–Barranquilla xeric scrub – Colombia (N = 64, key function = hr)

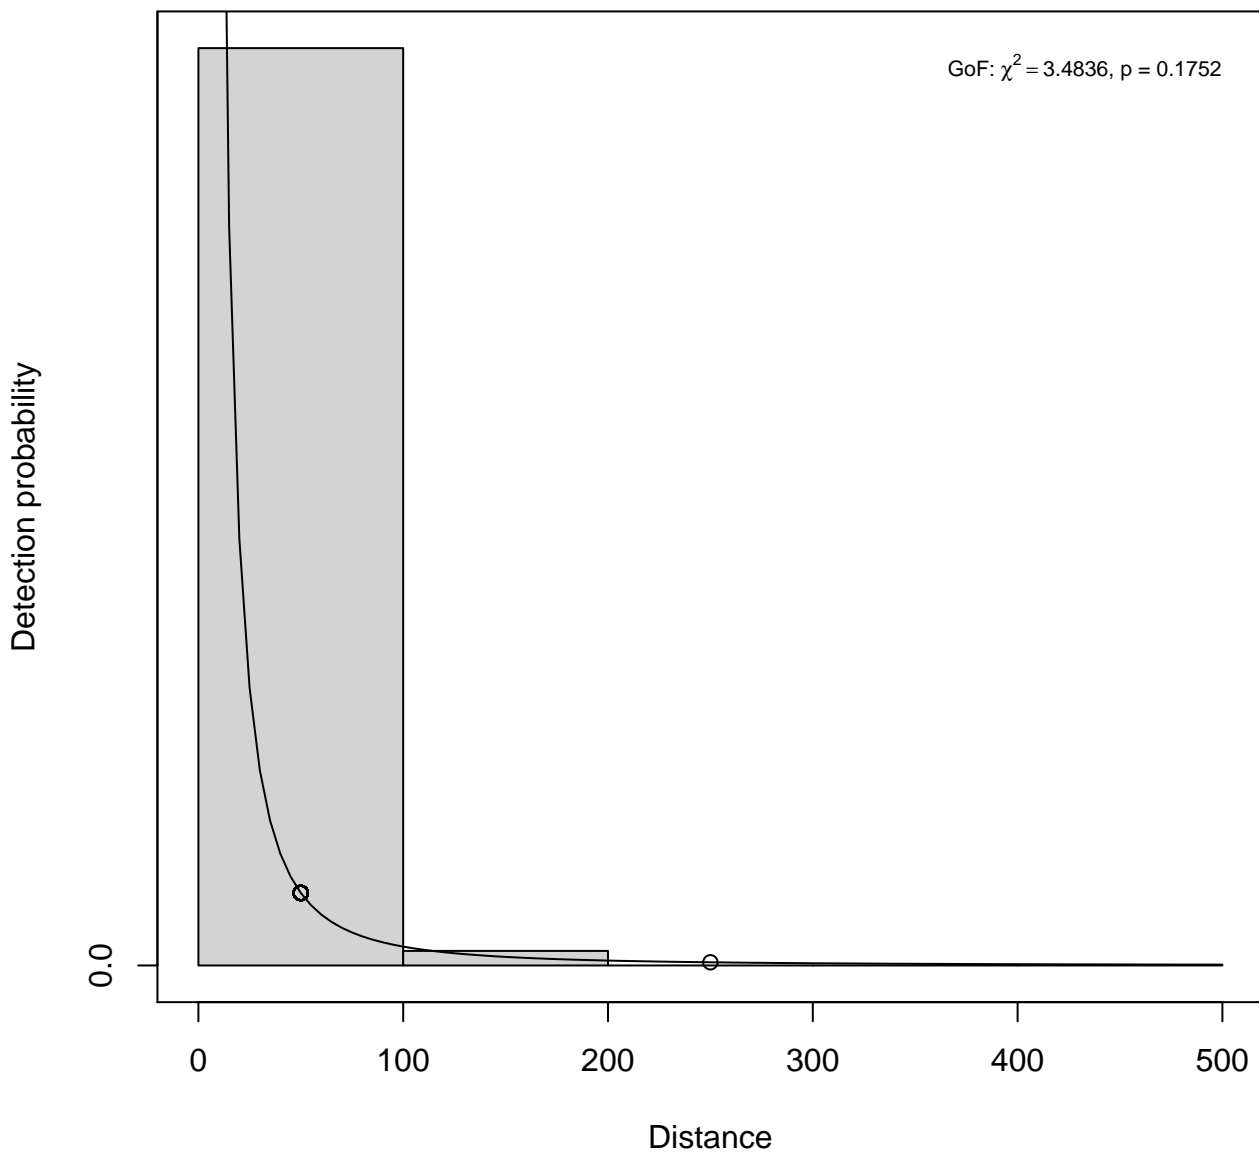

*Eupsittula pertinax* – Guajira–Barranquilla xeric scrub – Colombia (N = 64, key function = hr)

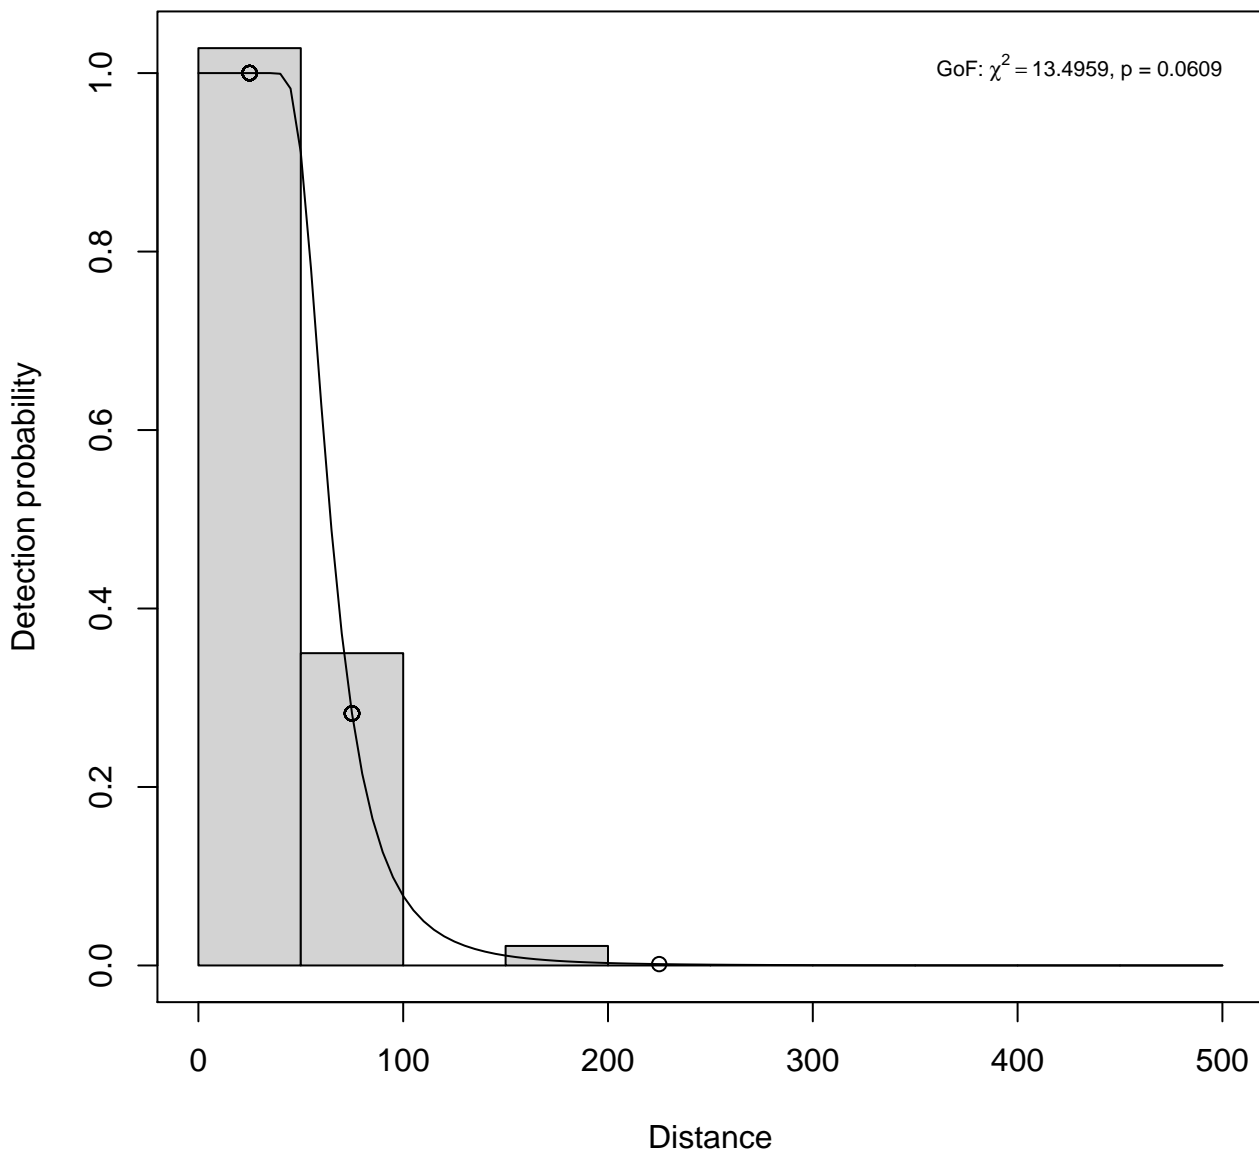

Supplement: s1 [file s1]
