# Supplementary material
Source: MDPI journal article supplement (https://www.mdpi.com/1424-2818/13/7/300)

# Aratinga nenday – Humid Chaco – Paraguay

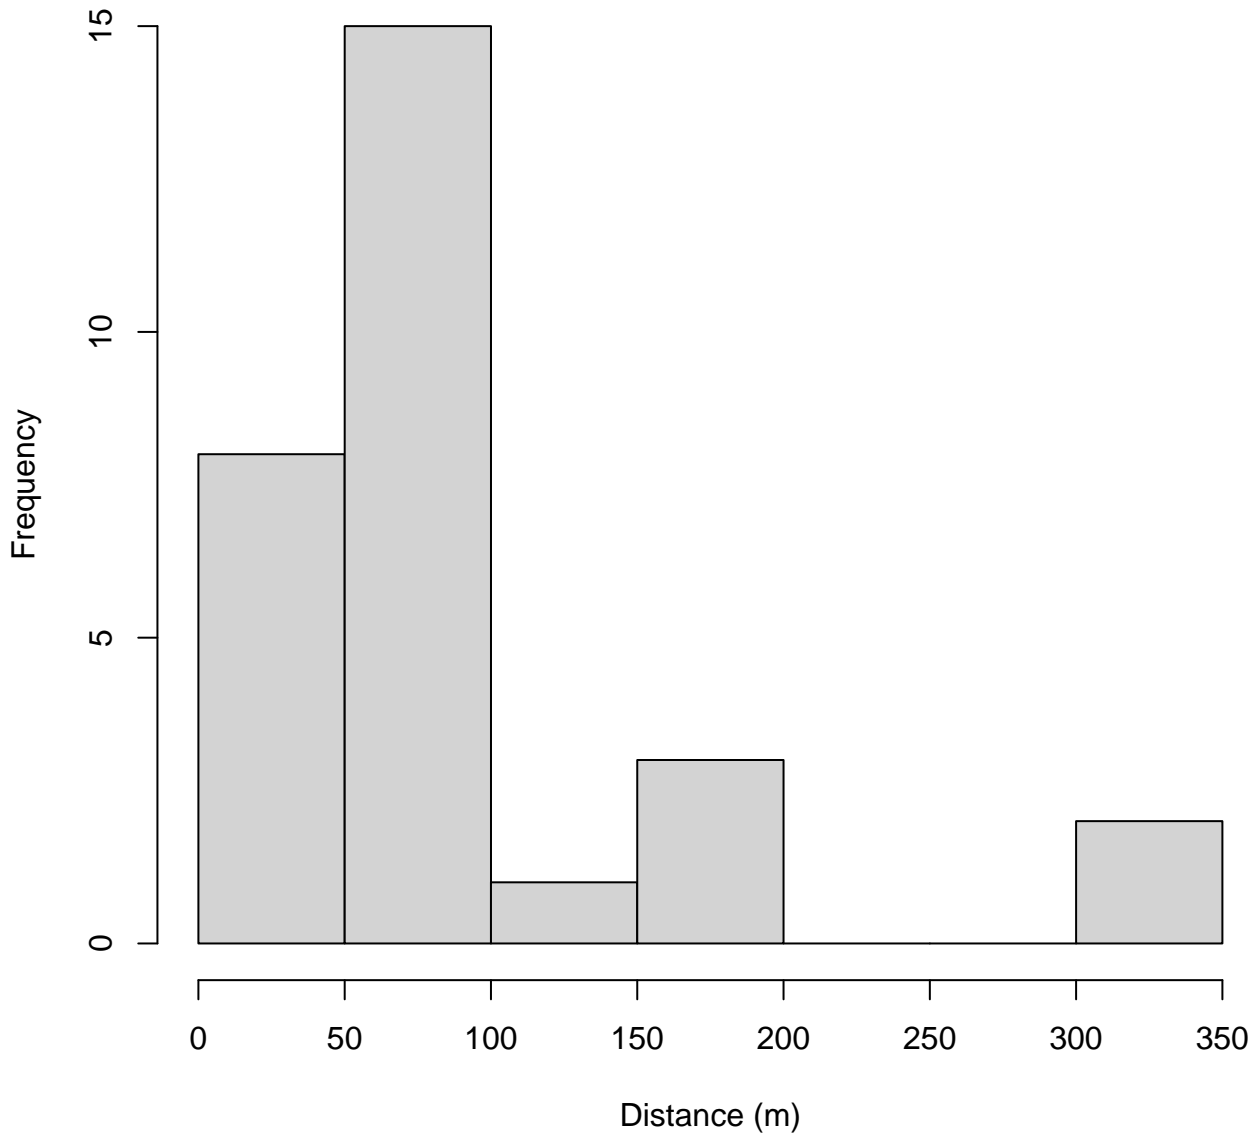

# Aratinga nenday – Humid Chaco – Paraguay

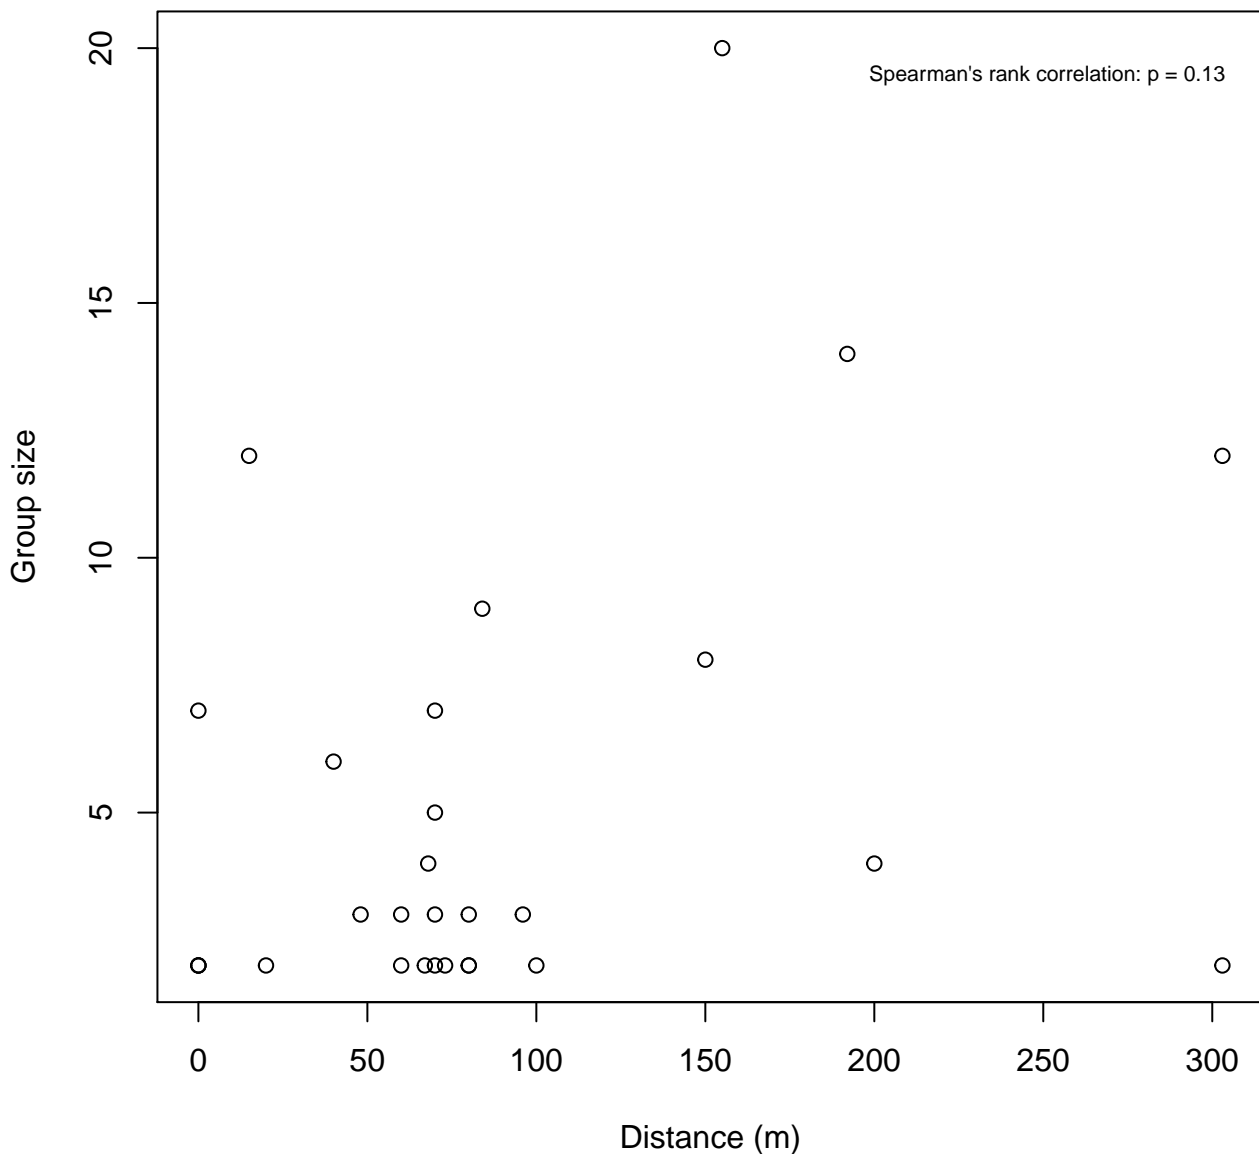

Aratinga nenday – Humid Chaco – Paraguay (N = 29, key function = hr)

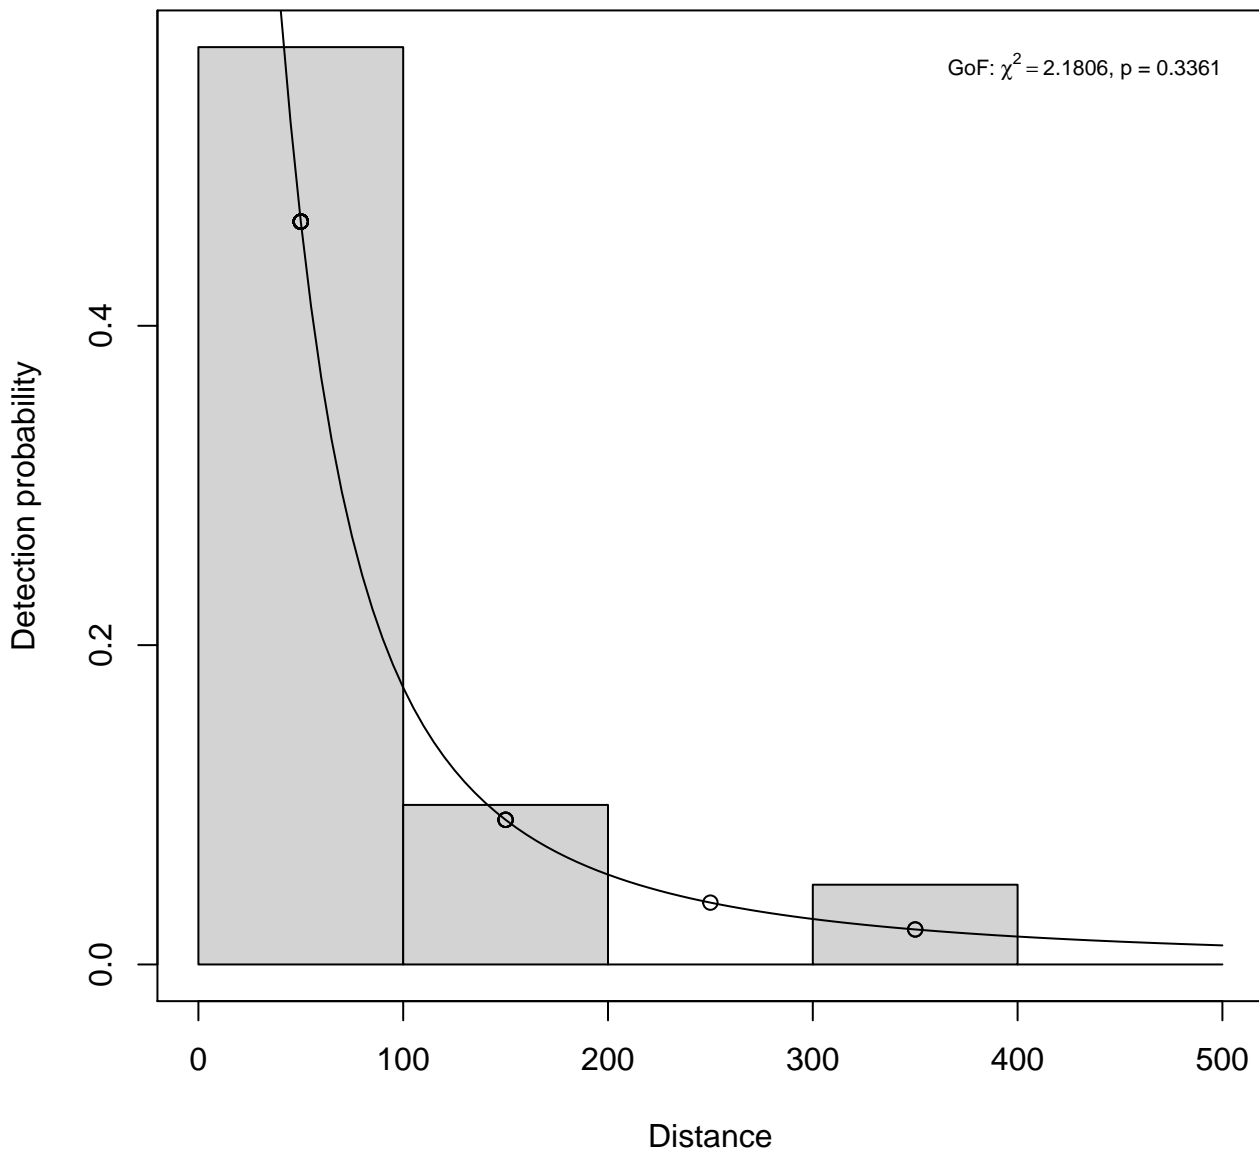

Aratinga nenday – Humid Chaco – Paraguay (N = 29, key function = hr)

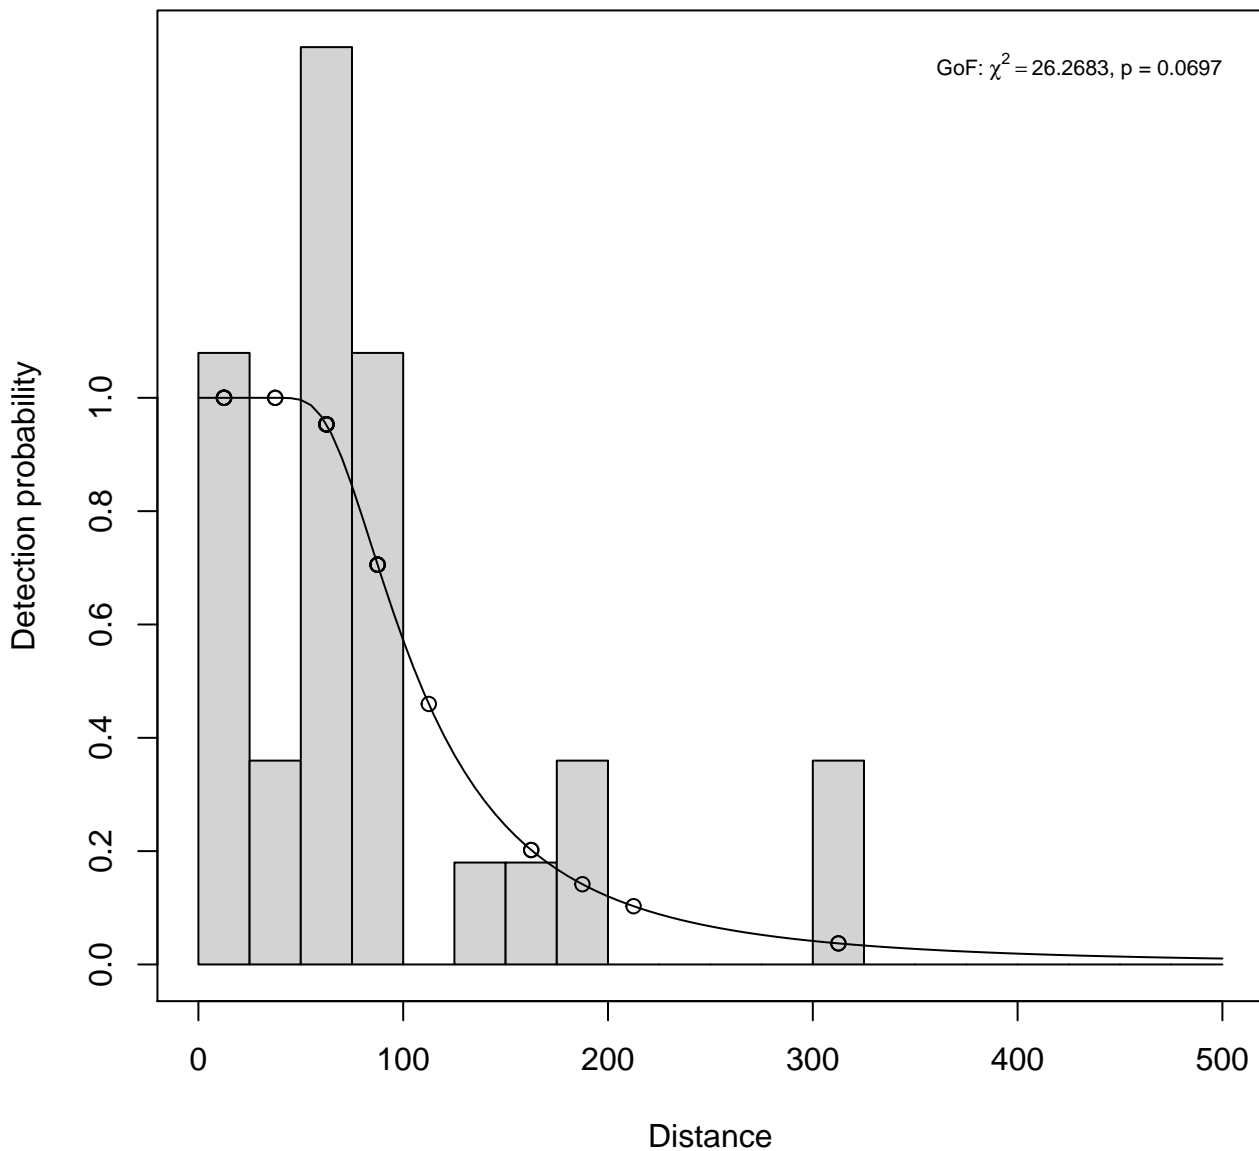

Aratinga nenday – Humid Chaco – Paraguay (N = 29, key function = hr)

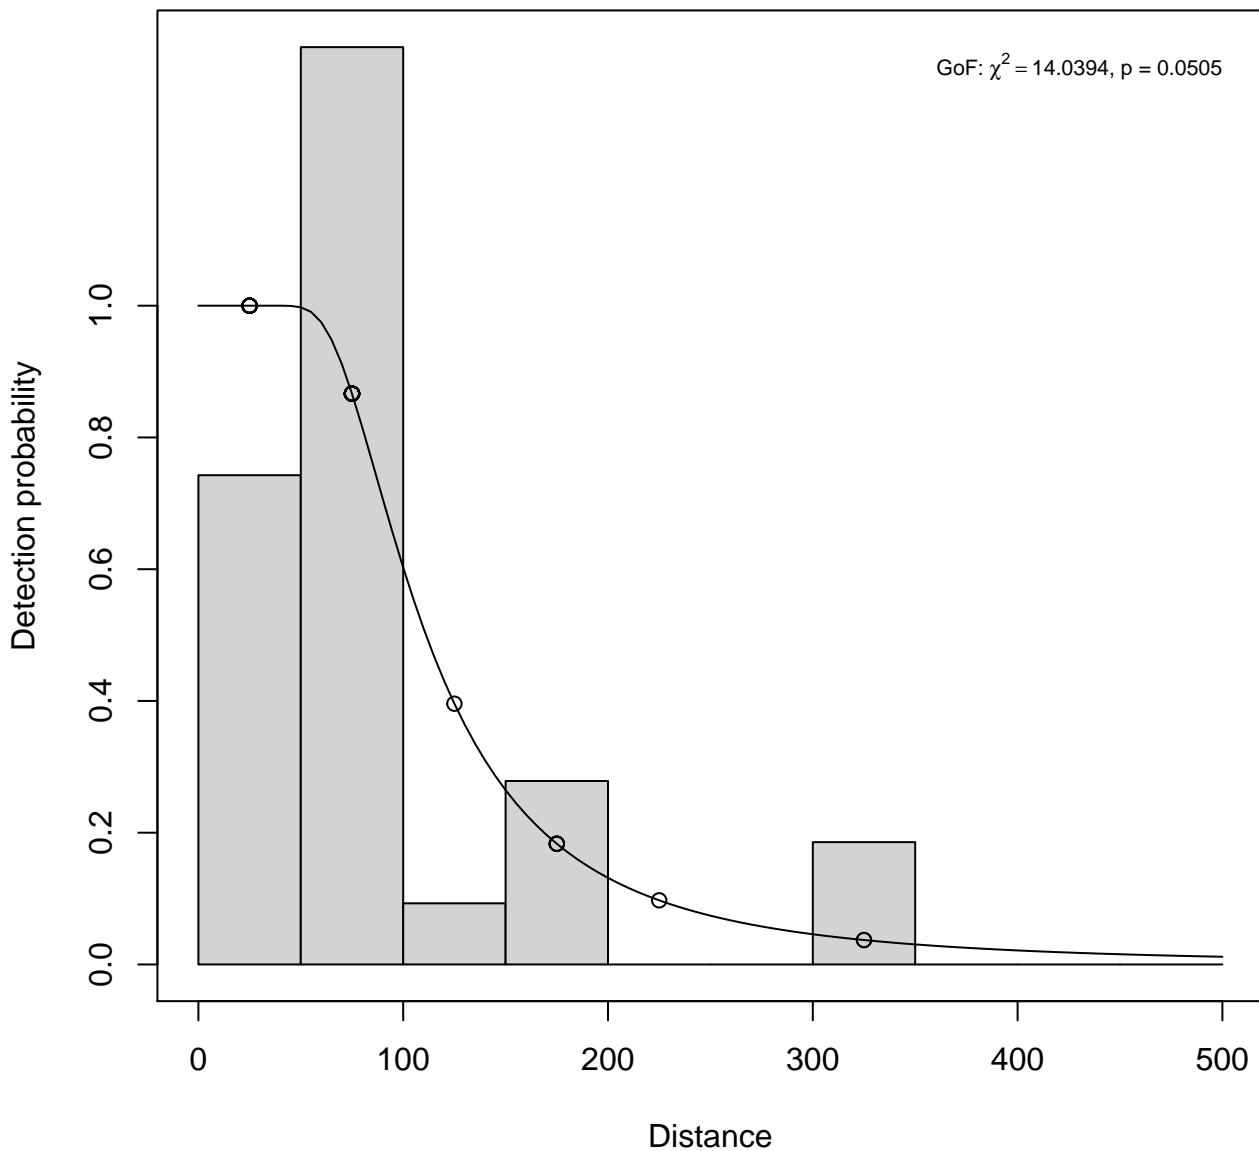

Supplement: s1 [file s1]
