# Supplementary material
Source: MDPI journal article supplement (https://www.mdpi.com/1424-2818/13/7/300)

# Psittacara wagleri – Cauca Valley montane forests – Colombia

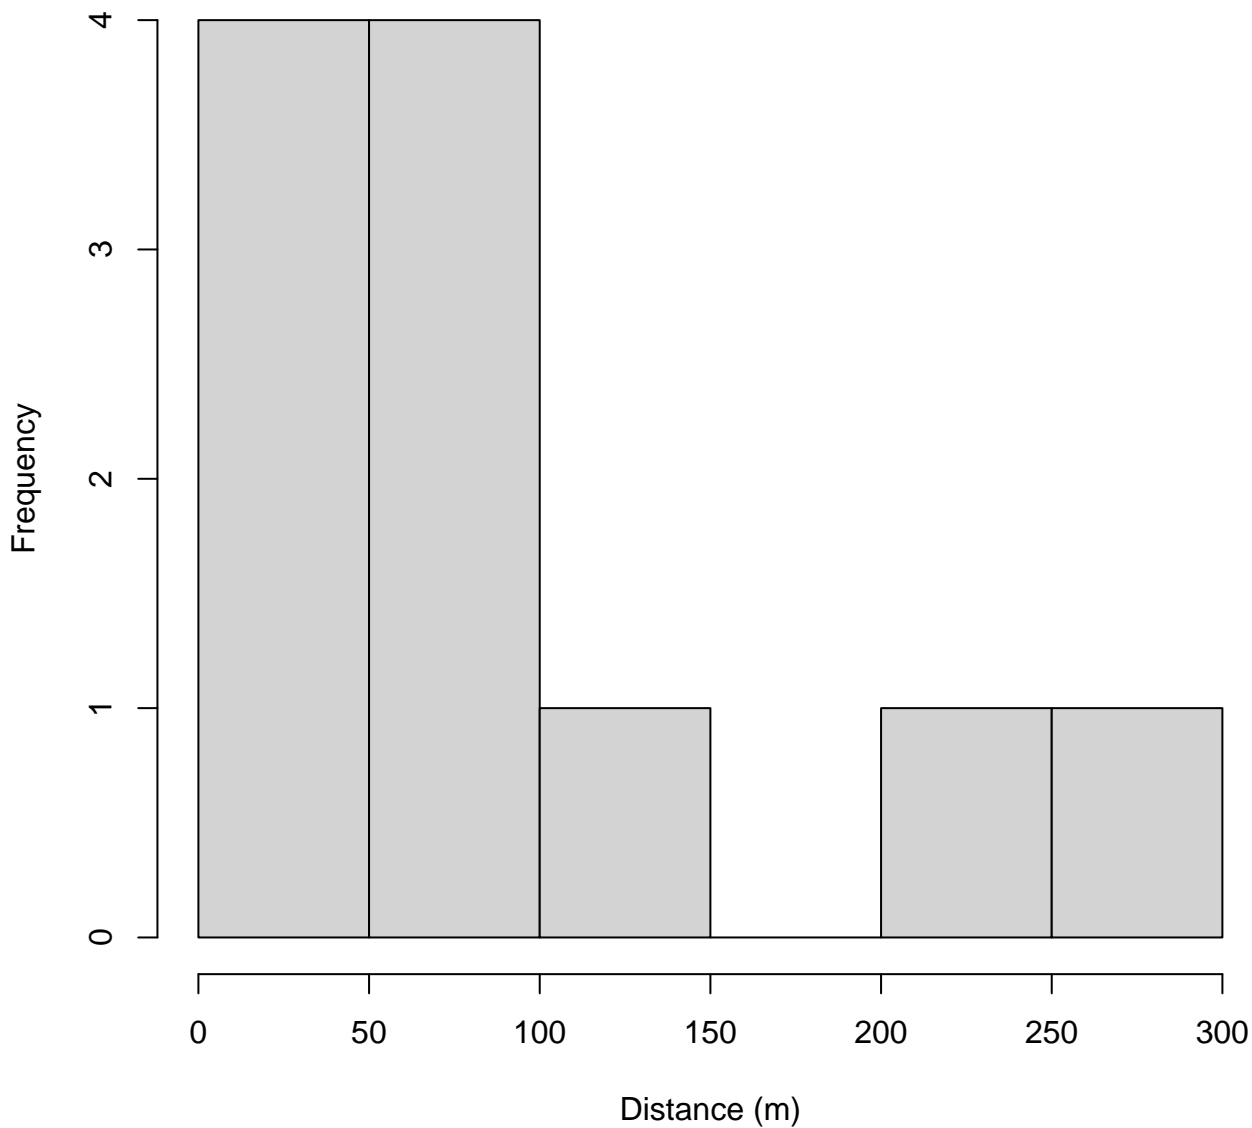

# Psittacara wagleri – Cauca Valley montane forests – Colombia

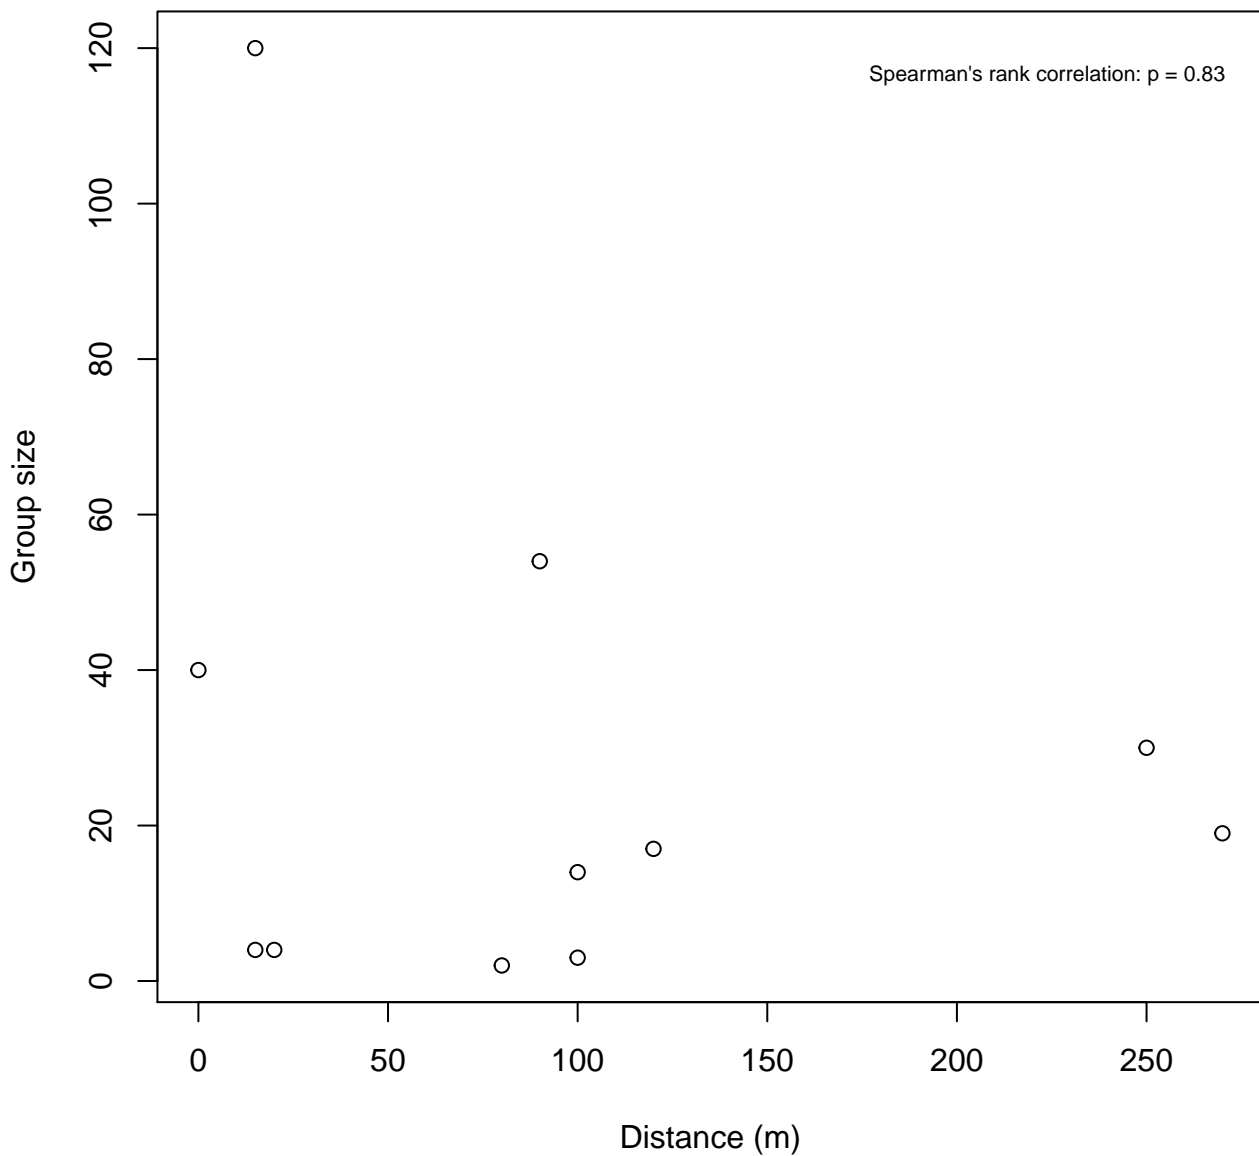

*Psittacara wagleri* – Cauca Valley montane forests – Colombia (N = 11, key function = hn)

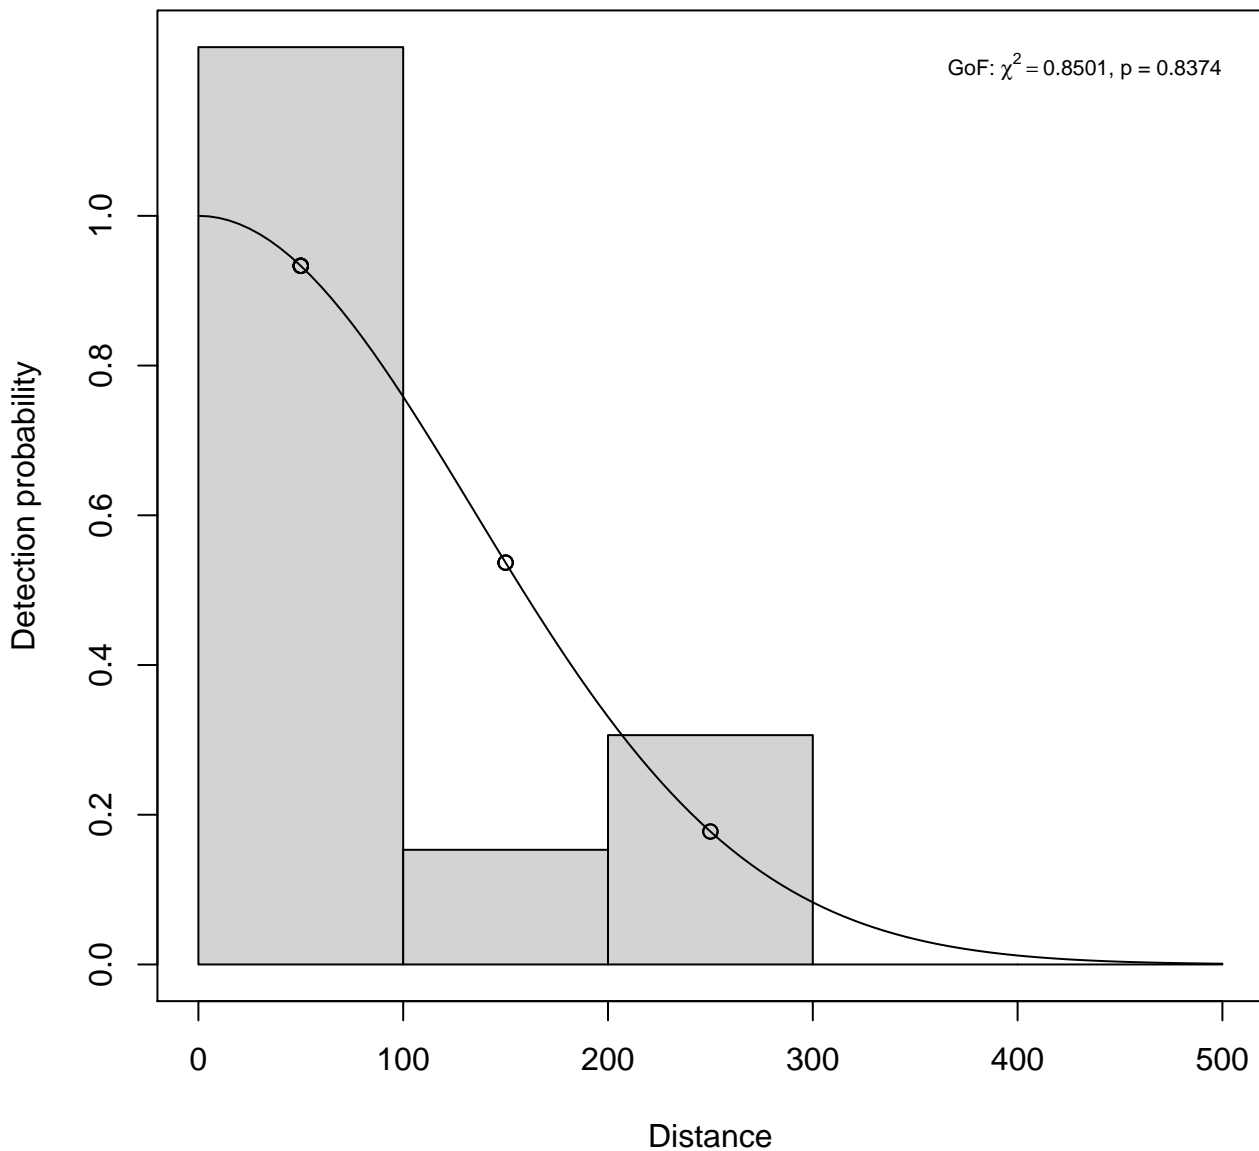

Psittacara wagleri – Cauca Valley montane forests – Colombia (N = 11, key function = hn)

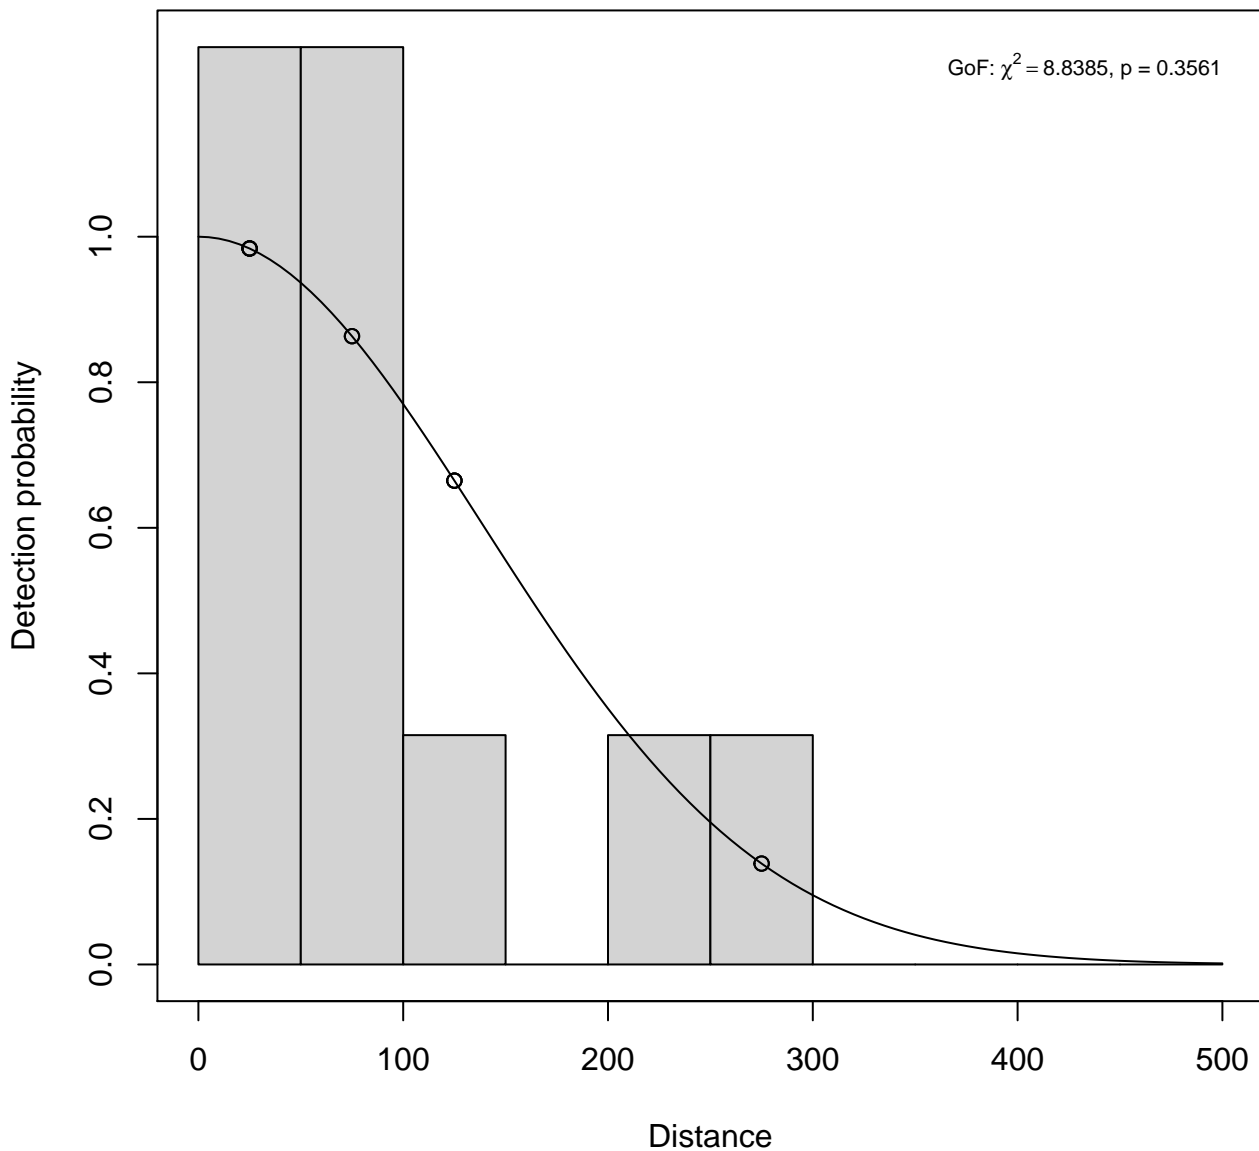

*Psittacara wagleri* – Cauca Valley montane forests – Colombia (N = 11, key function = hn)

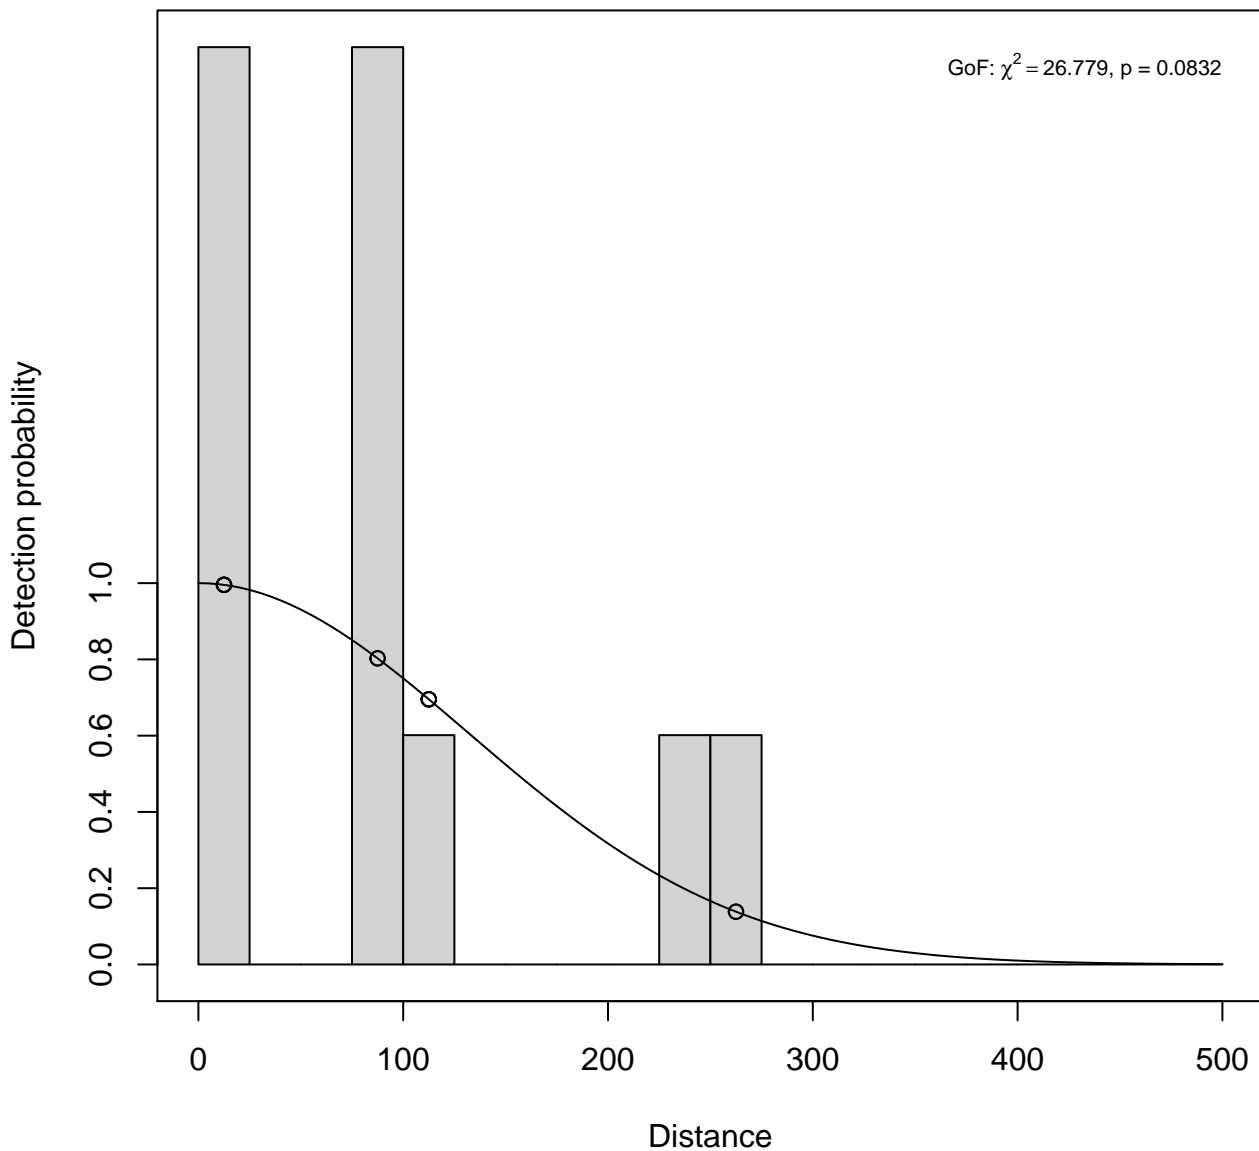

Supplement: s1 [file s1]
