# Supplementary material
Source: MDPI journal article supplement (https://www.mdpi.com/1424-2818/13/7/300)

**Psittacula krameri – Sri Lanka dry-zone dry evergreen forests – Sri Lanka**

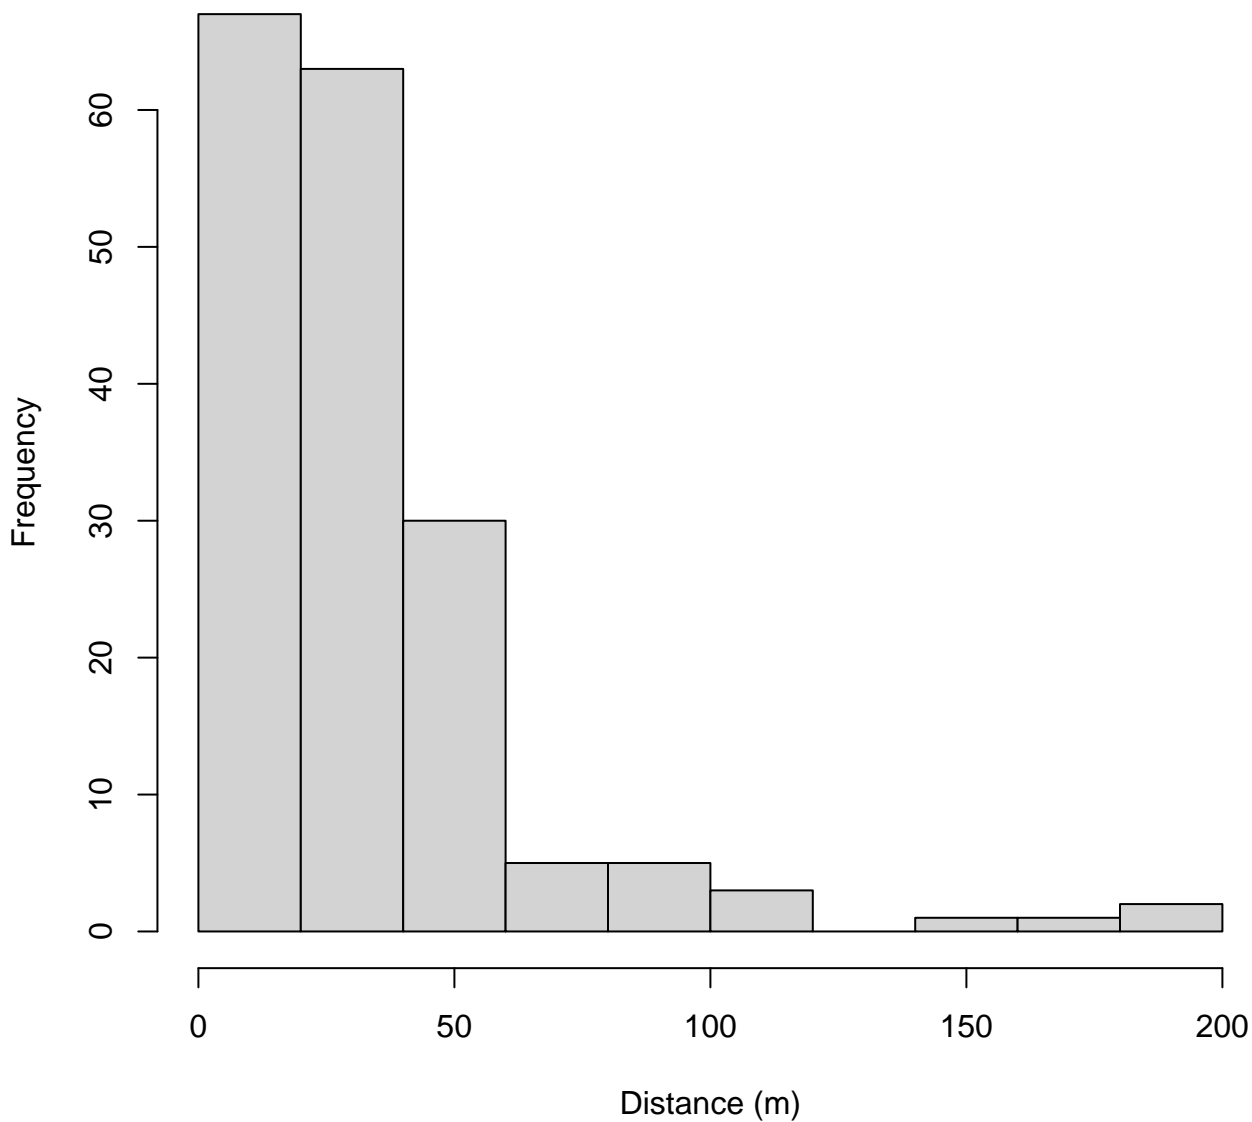

**Psittacula krameri – Sri Lanka dry-zone dry evergreen forests – Sri Lanka**

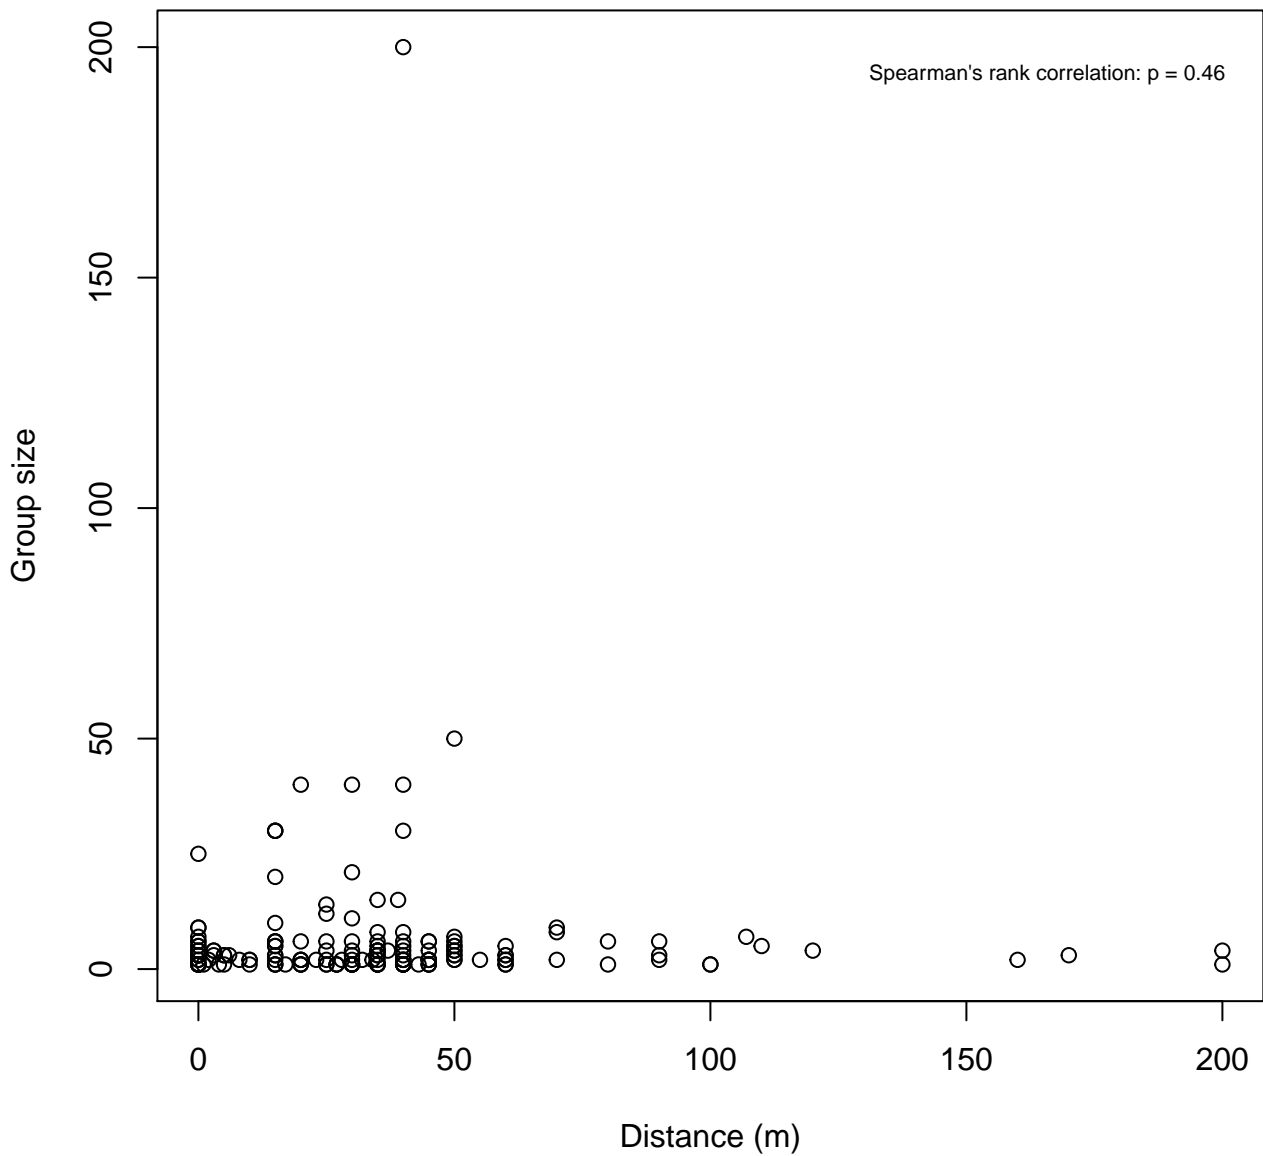

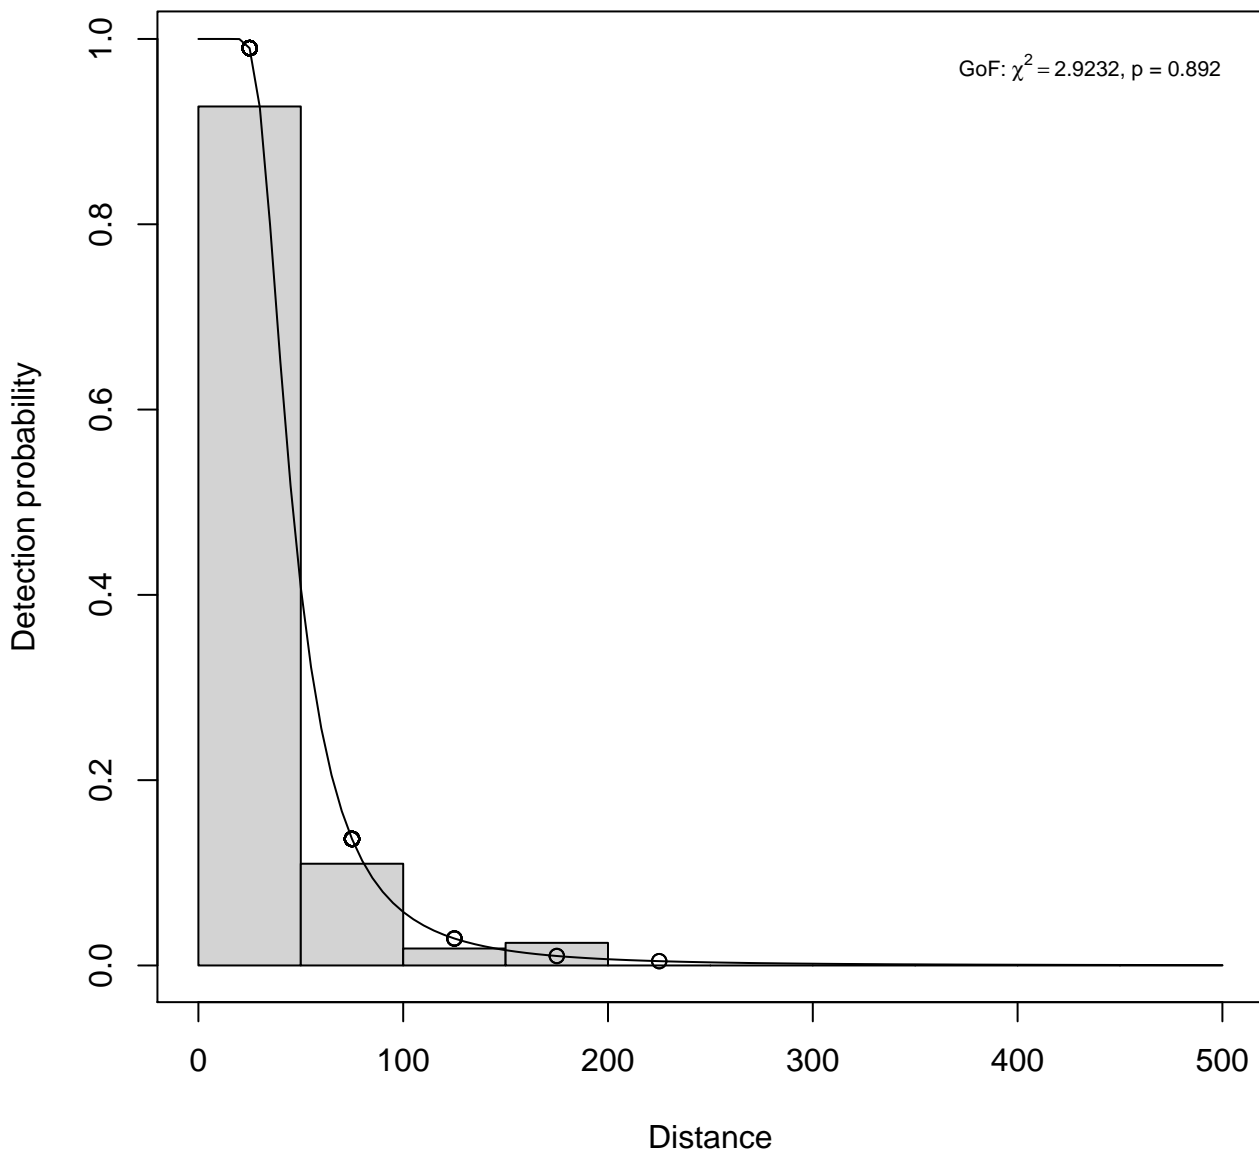

*Psittacula krameri* – Sri Lanka dry-zone dry evergreen forests – Sri Lanka (N = 177, key function = hr)

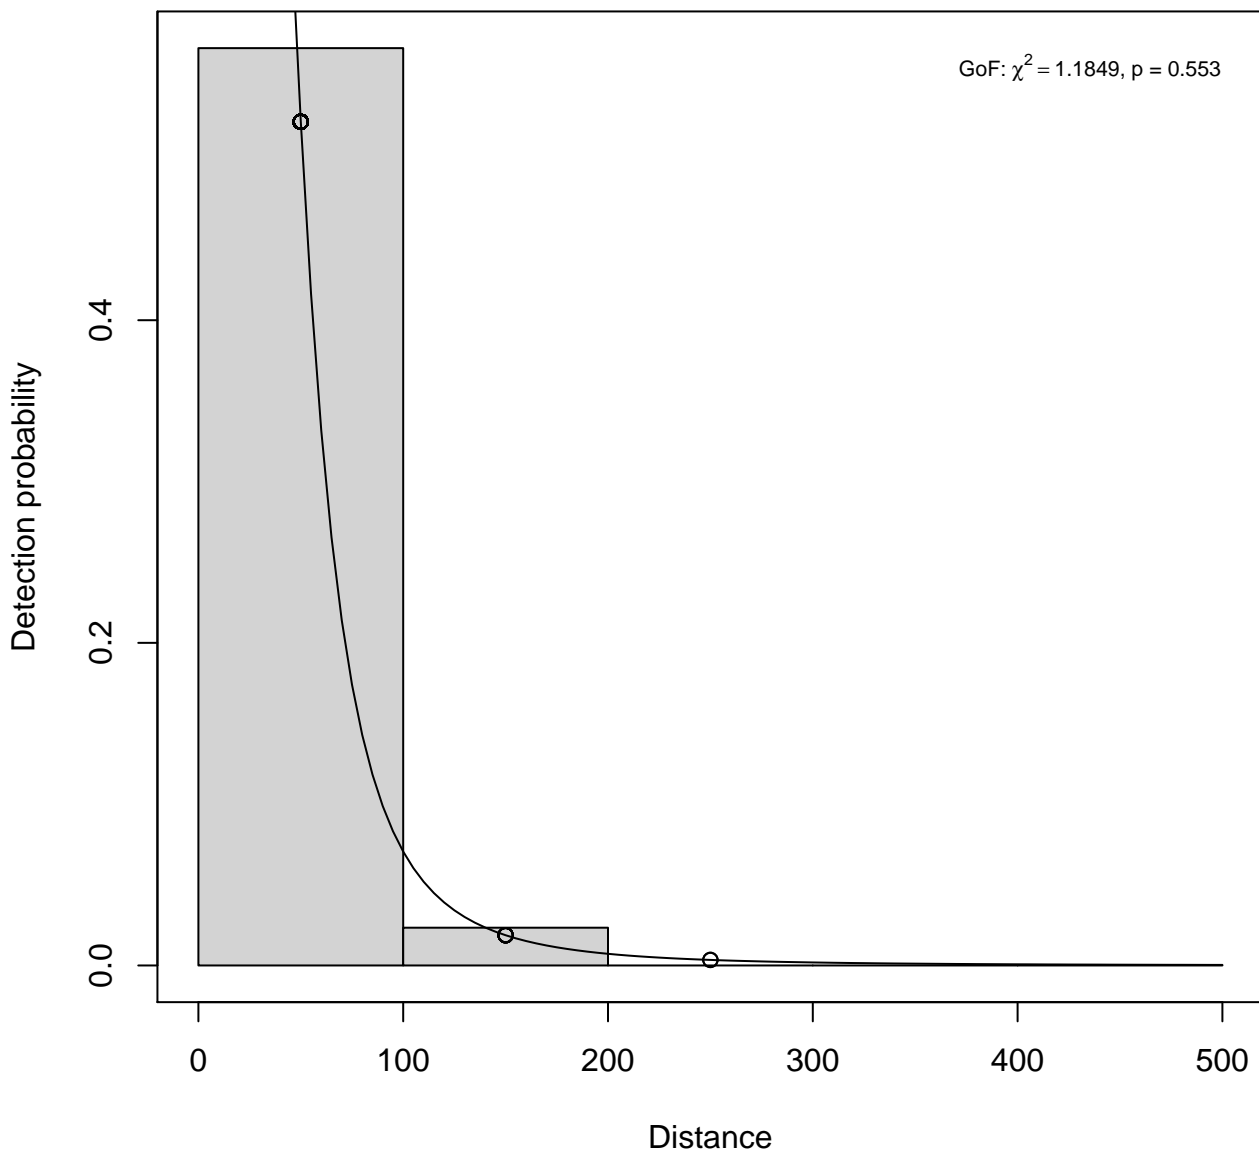

Psittacula krameri – Sri Lanka dry-zone dry evergreen forests – Sri Lanka (N = 177, key function = hr)

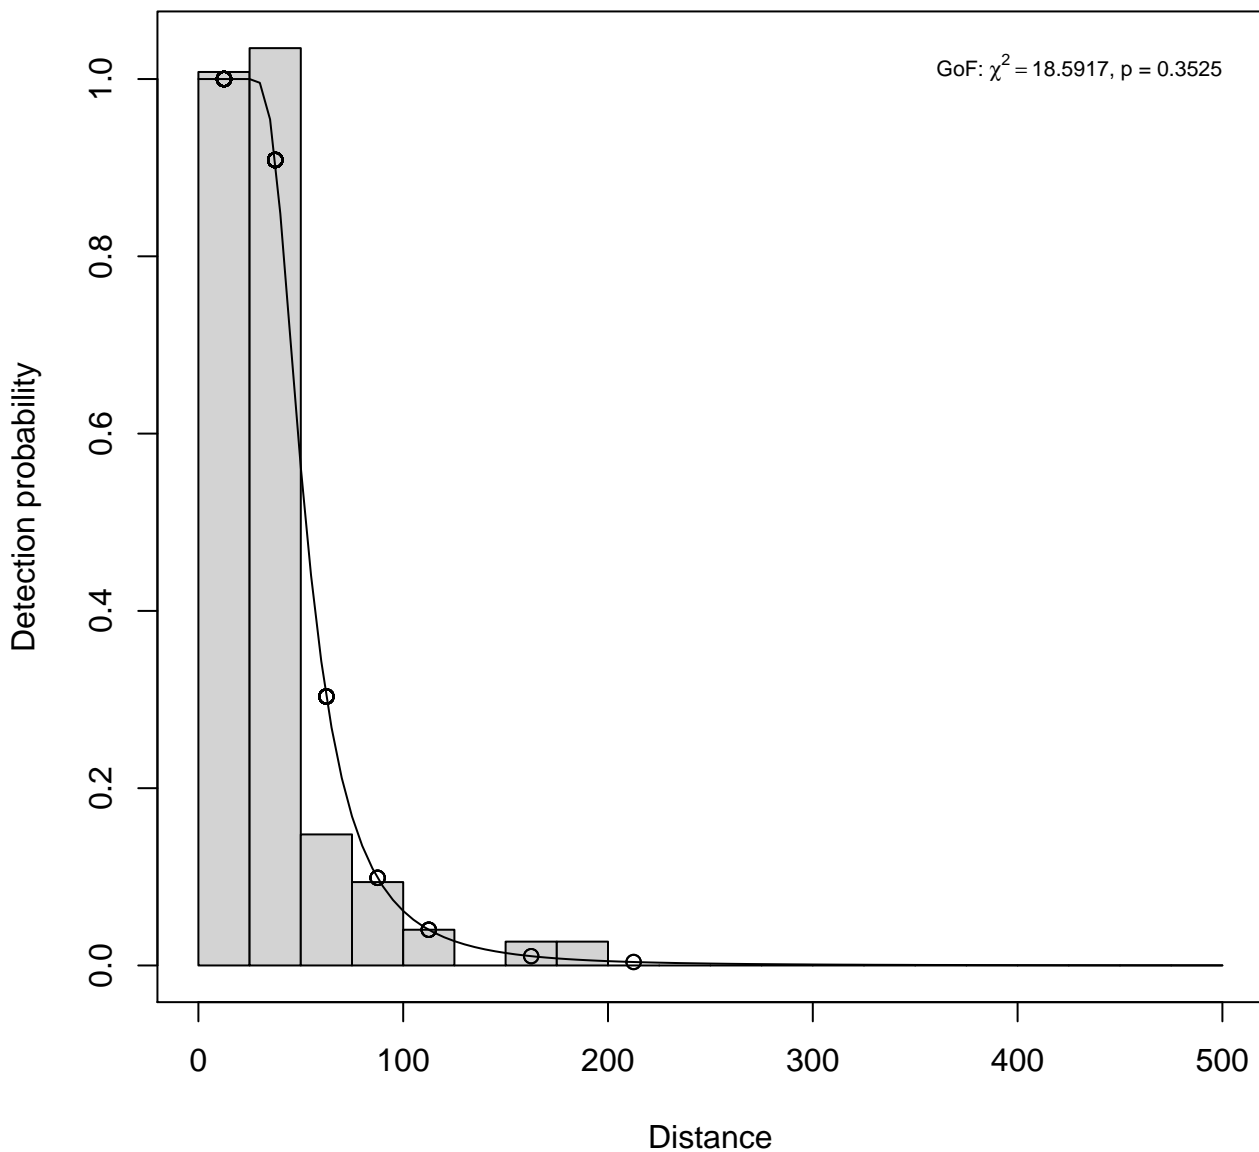

Supplement: s1 [file s1]
