# Supplementary material
Source: MDPI journal article supplement (https://www.mdpi.com/1424-2818/13/7/300)

# **Pionus maximiliani – Pantanal – Bolivia**

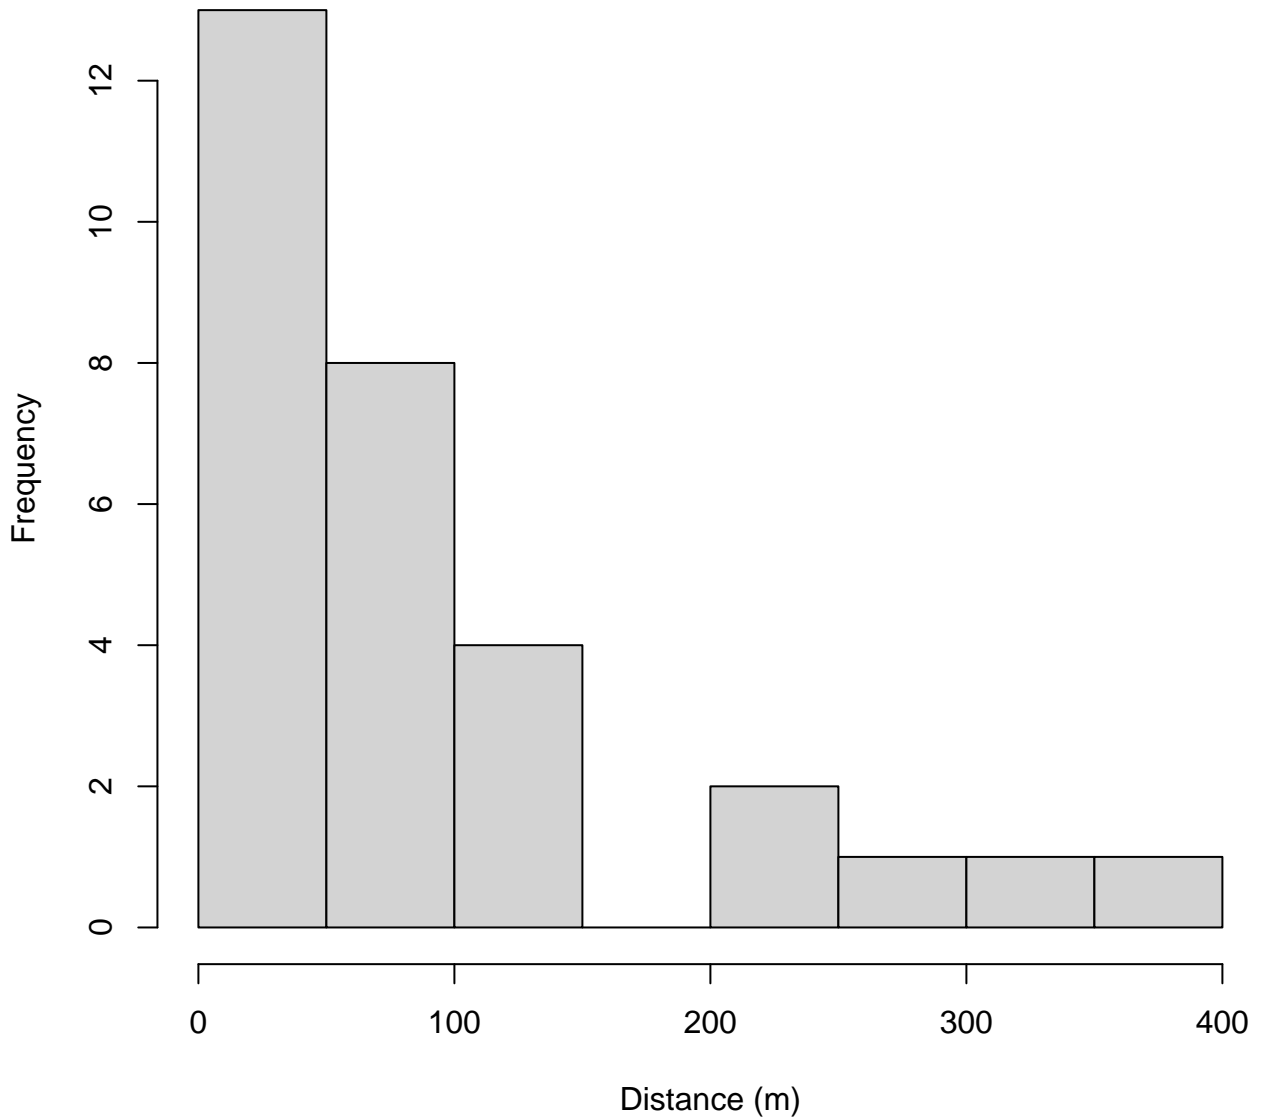

# Pionus maximiliani – Pantanal – Bolivia

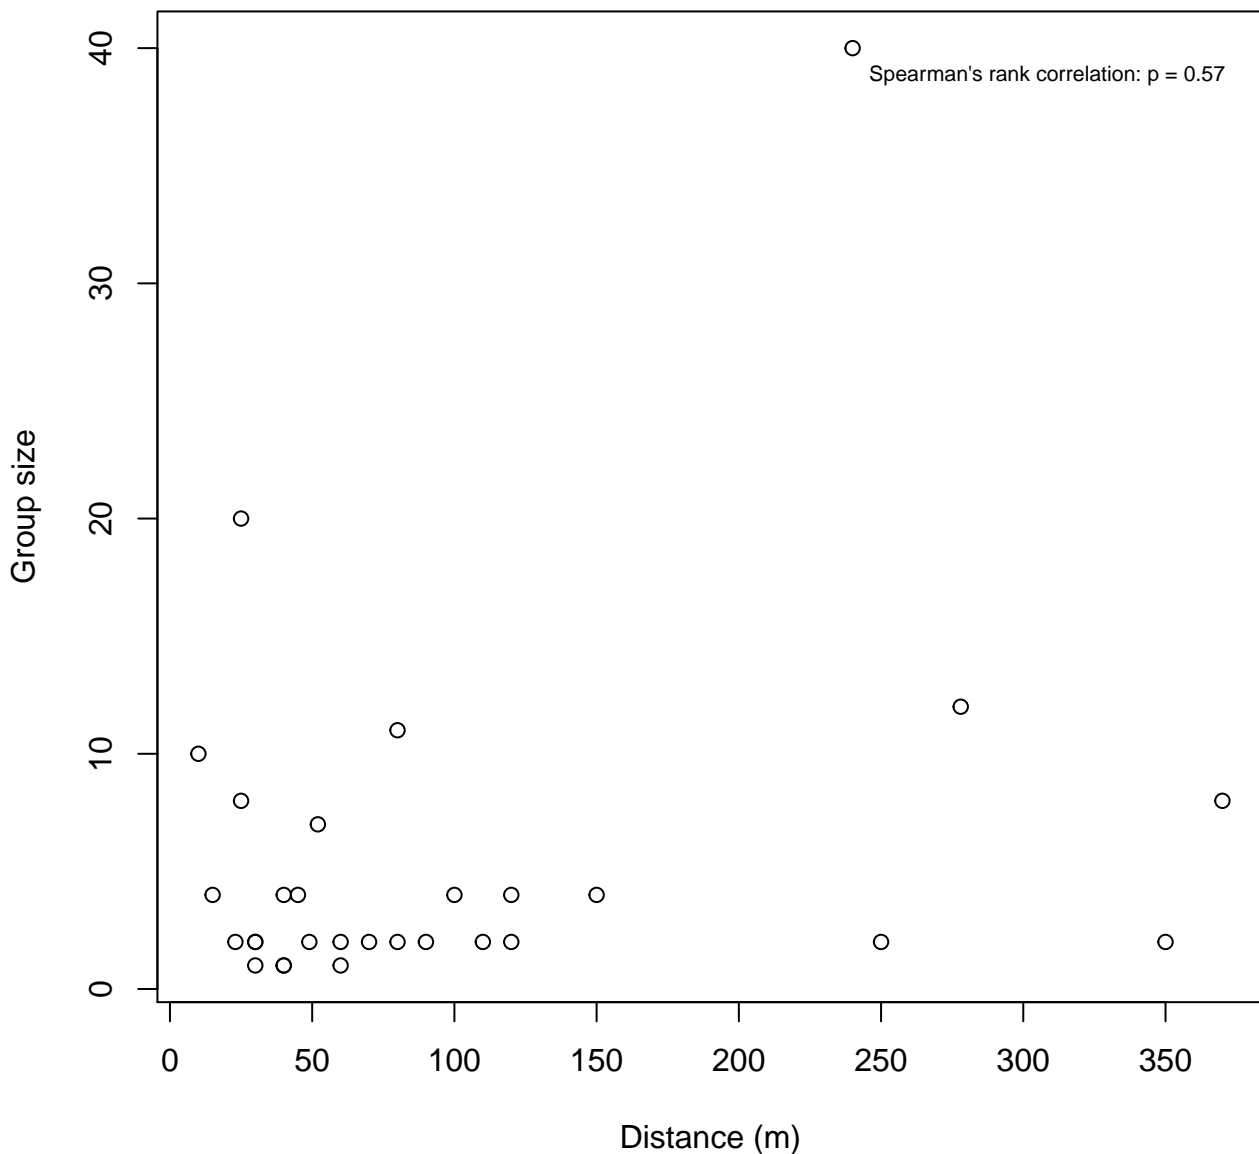

Pionus maximiliani – Pantanal – Bolivia (N = 30, key function = hr)

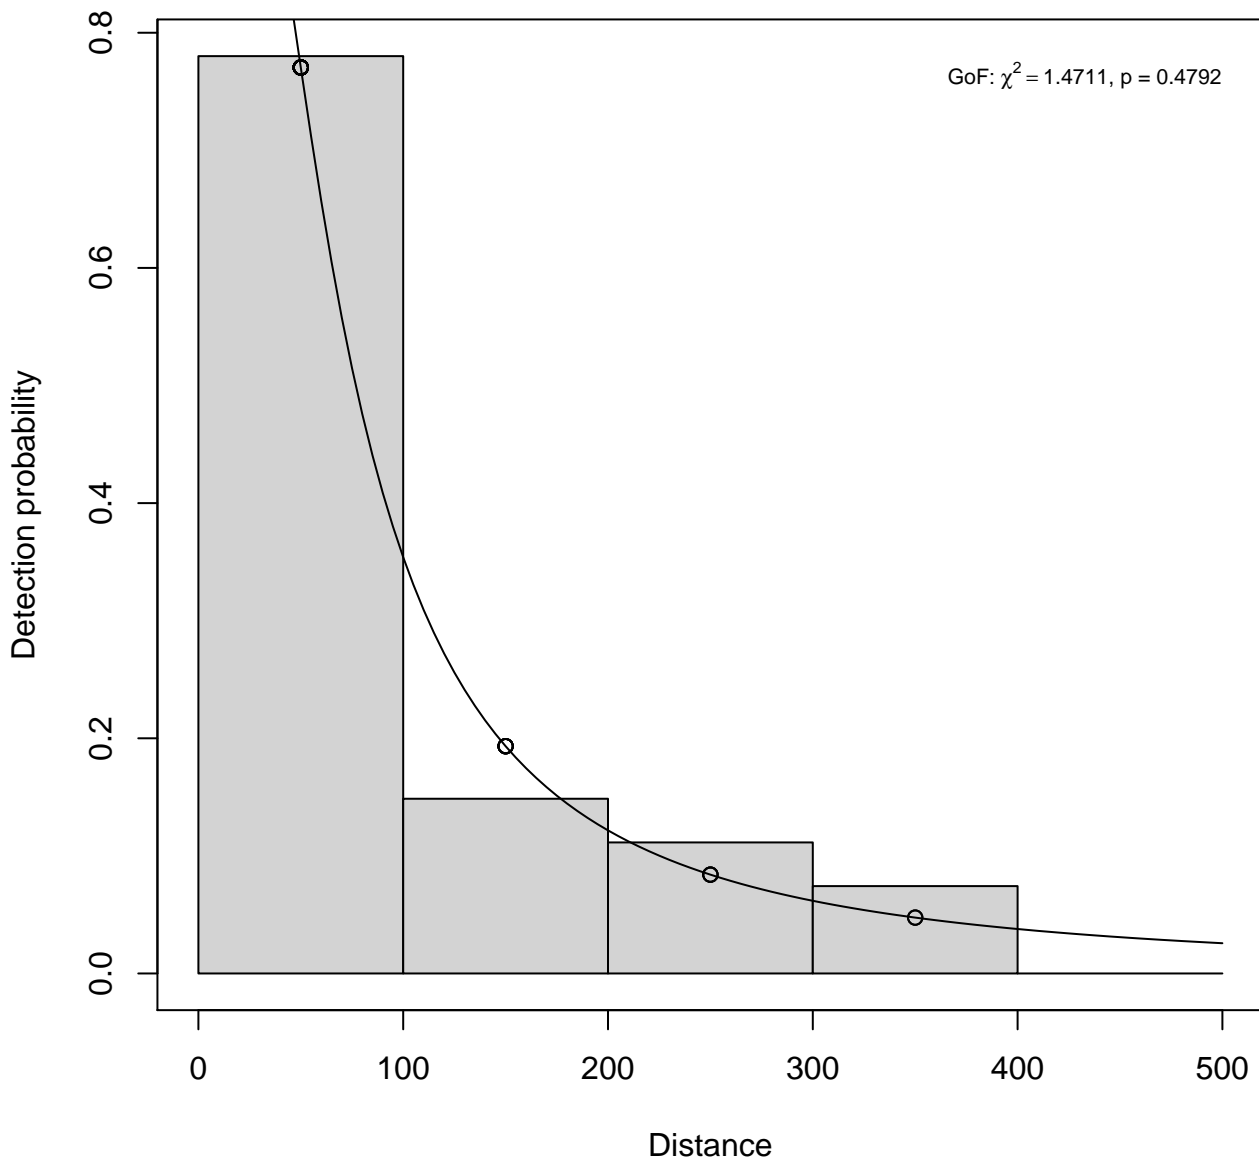

Pionus maximiliani – Pantanal – Bolivia (N = 30, key function = hr)

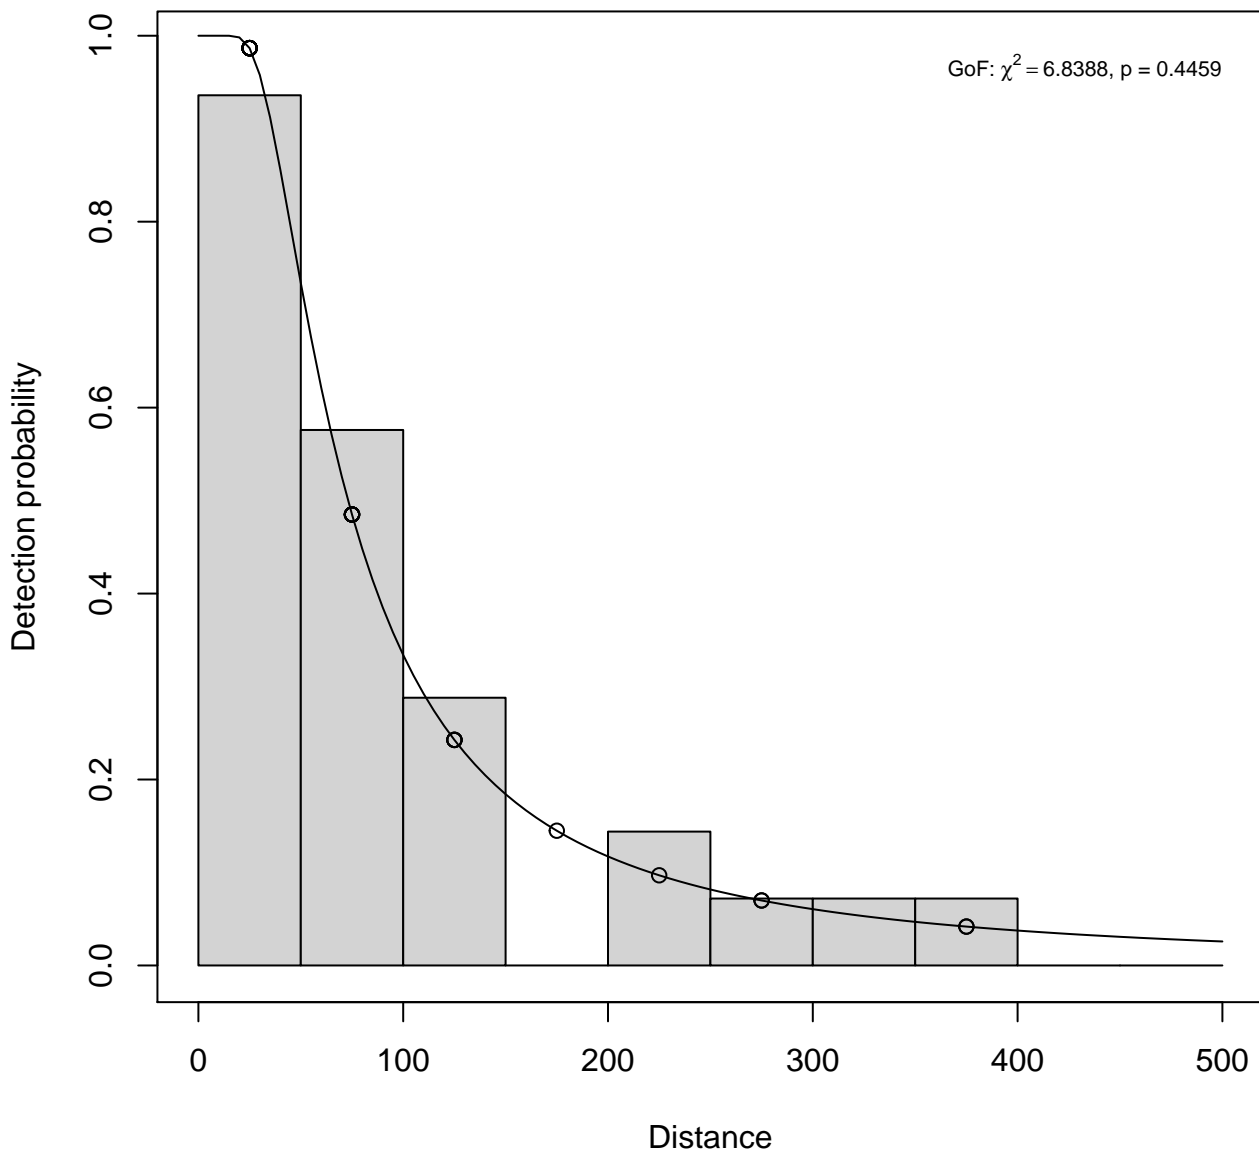

Pionus maximiliani – Pantanal – Bolivia (N = 30, key function = hr)

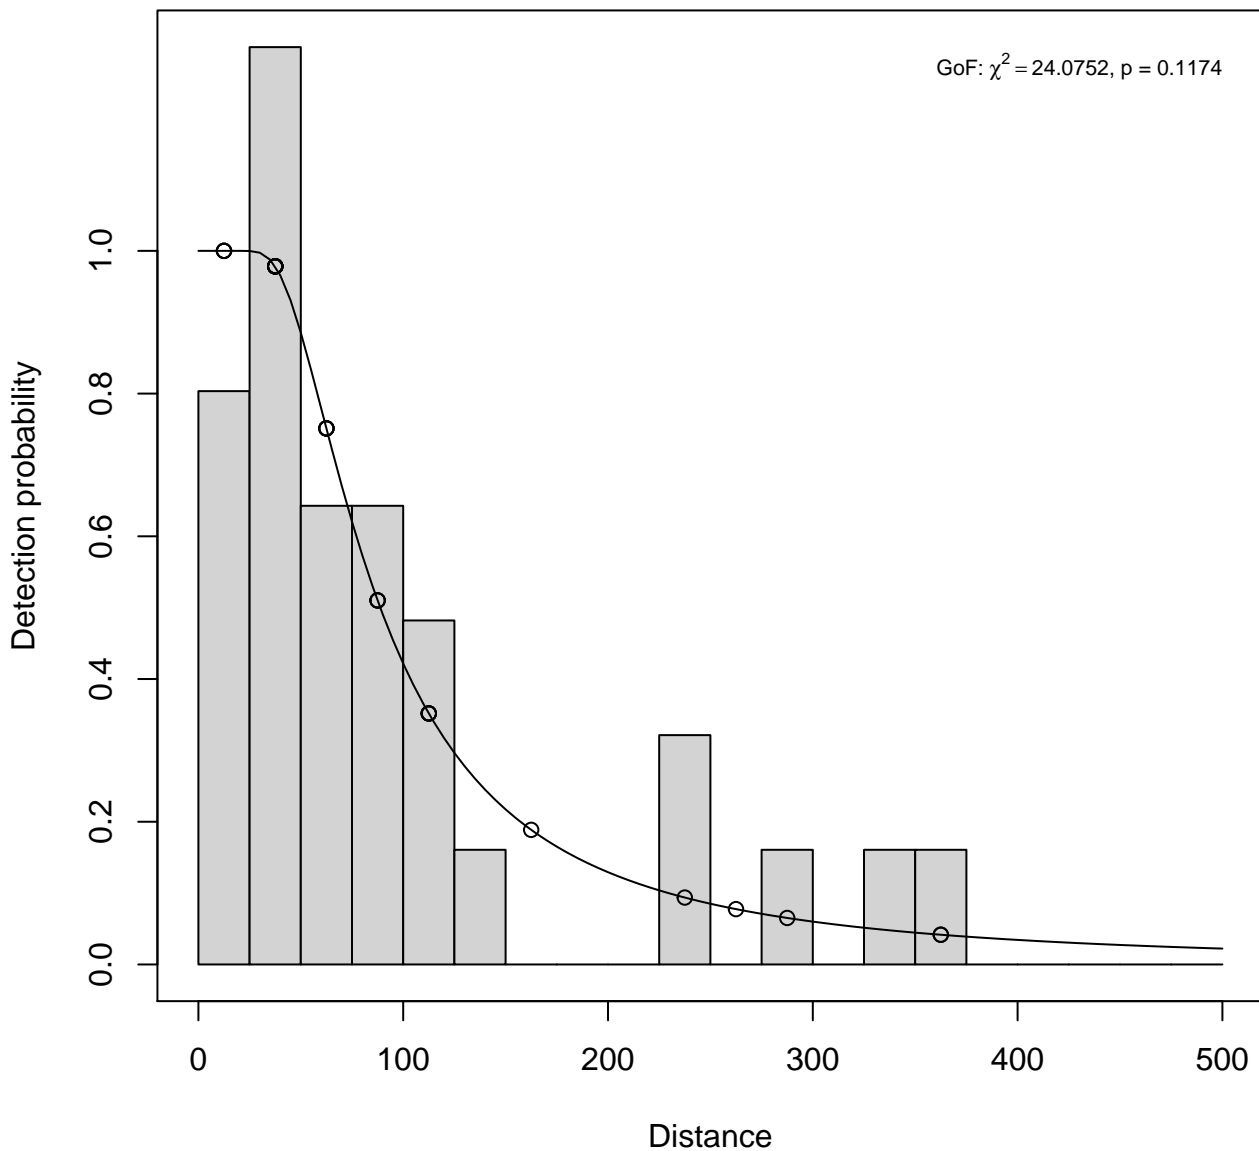

Supplement: s1 [file s1]
