# Supplementary material
Source: MDPI journal article supplement (https://www.mdpi.com/1424-2818/13/7/300)

# **Pionus senilis – Isthmian–Pacific moist forests – Costa Rica**

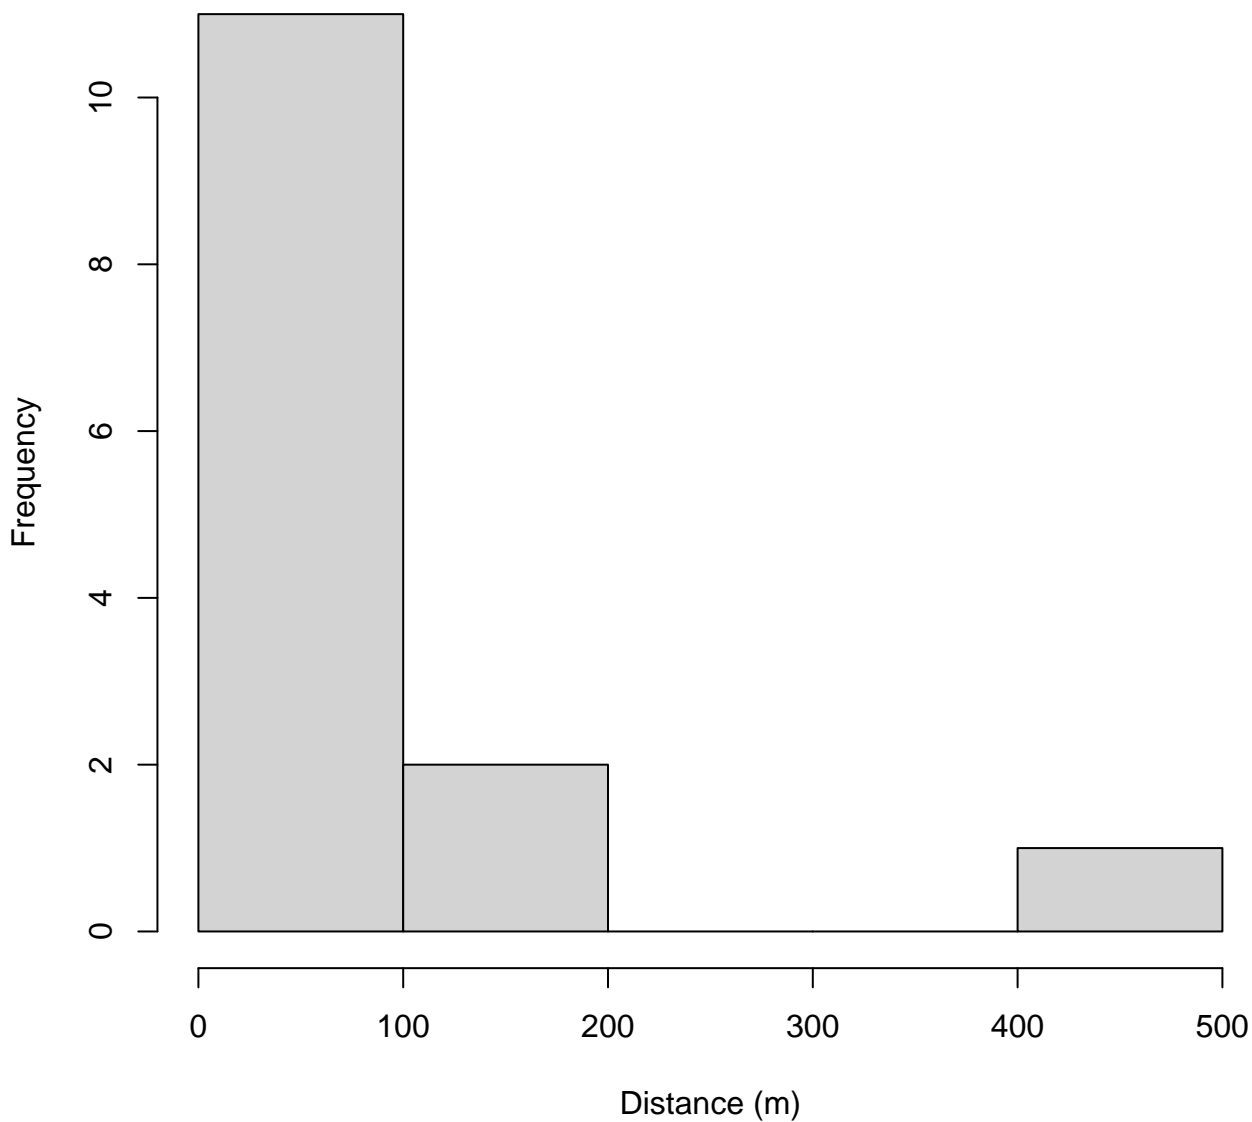

# **Pionus senilis – Isthmian–Pacific moist forests – Costa Rica**

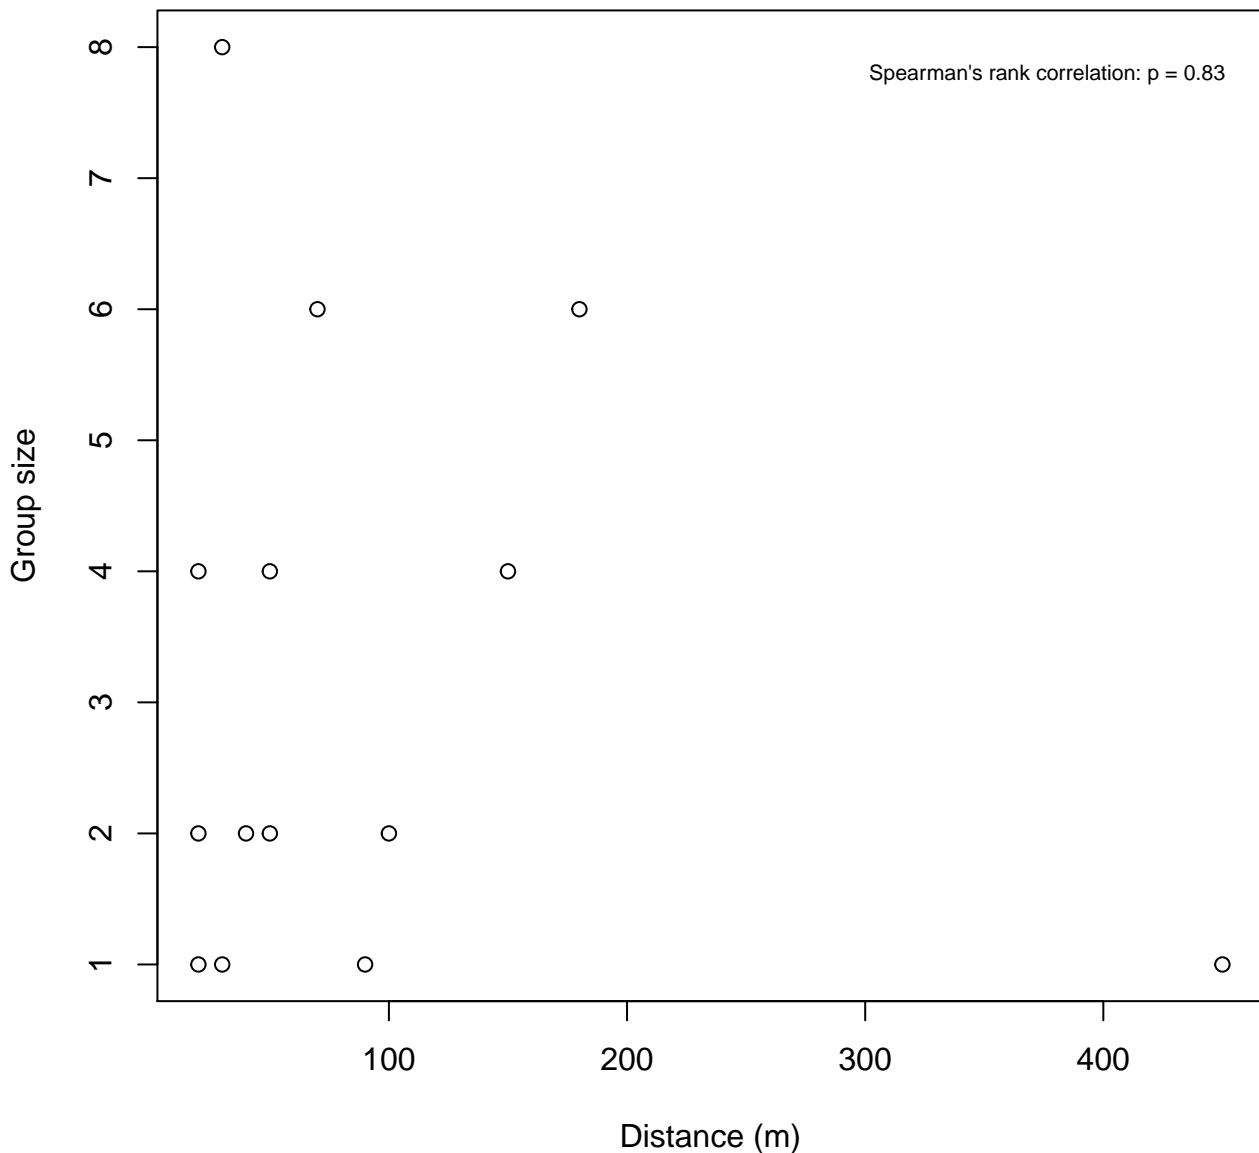

Pionus senilis – Isthmian–Pacific moist forests – Costa Rica (N = 14, key function = hr)

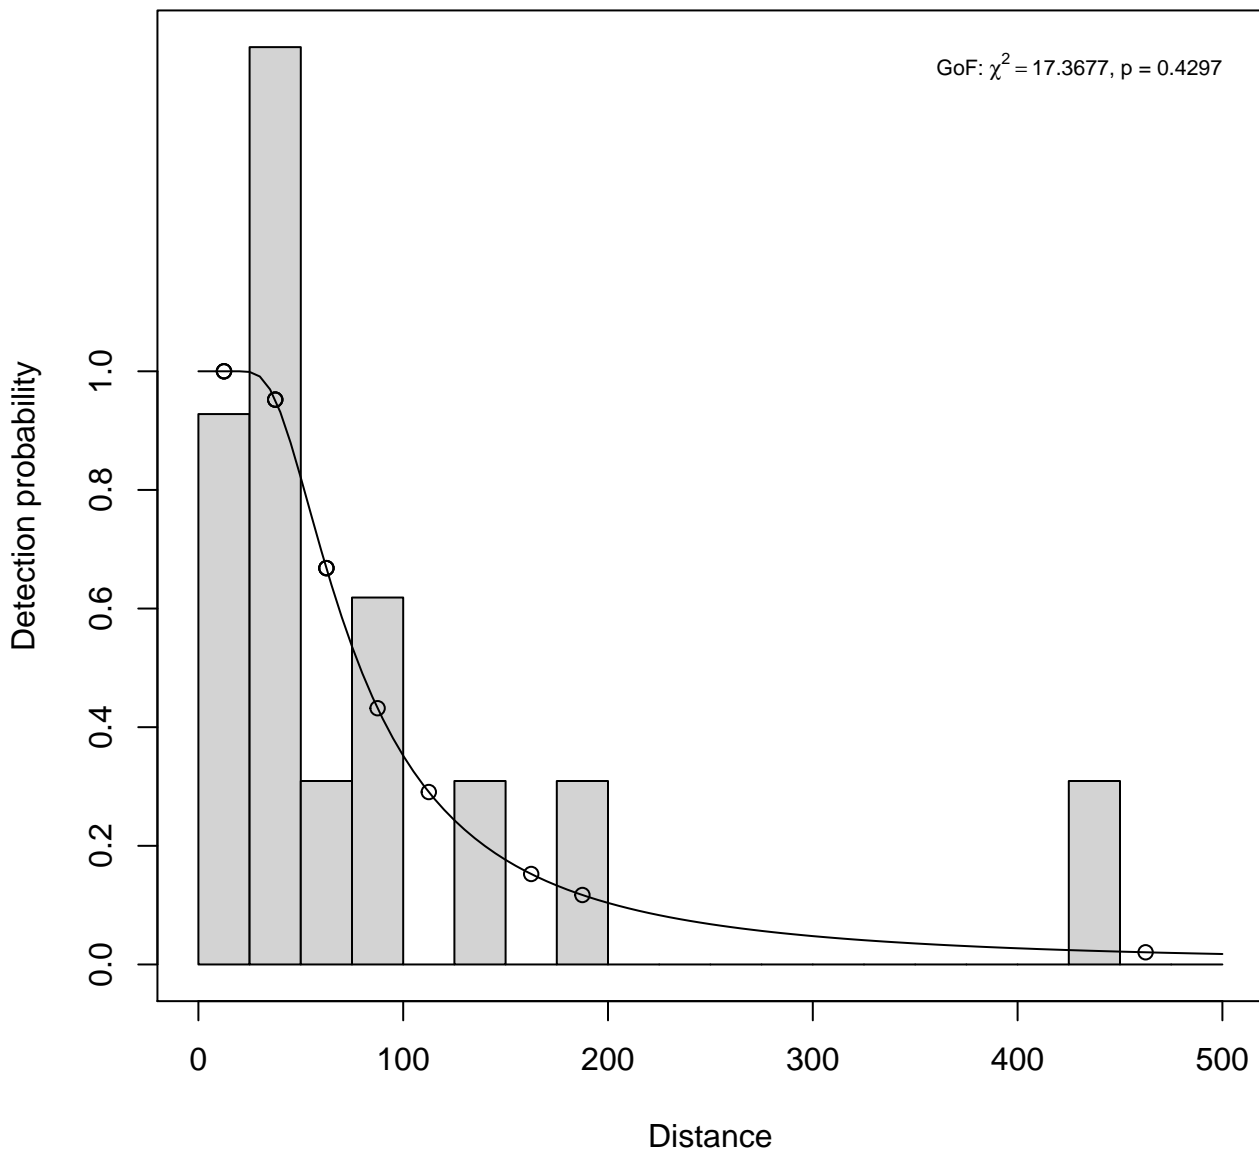

*Pionus senilis* – Isthmian–Pacific moist forests – Costa Rica (N = 14, key function = hr)

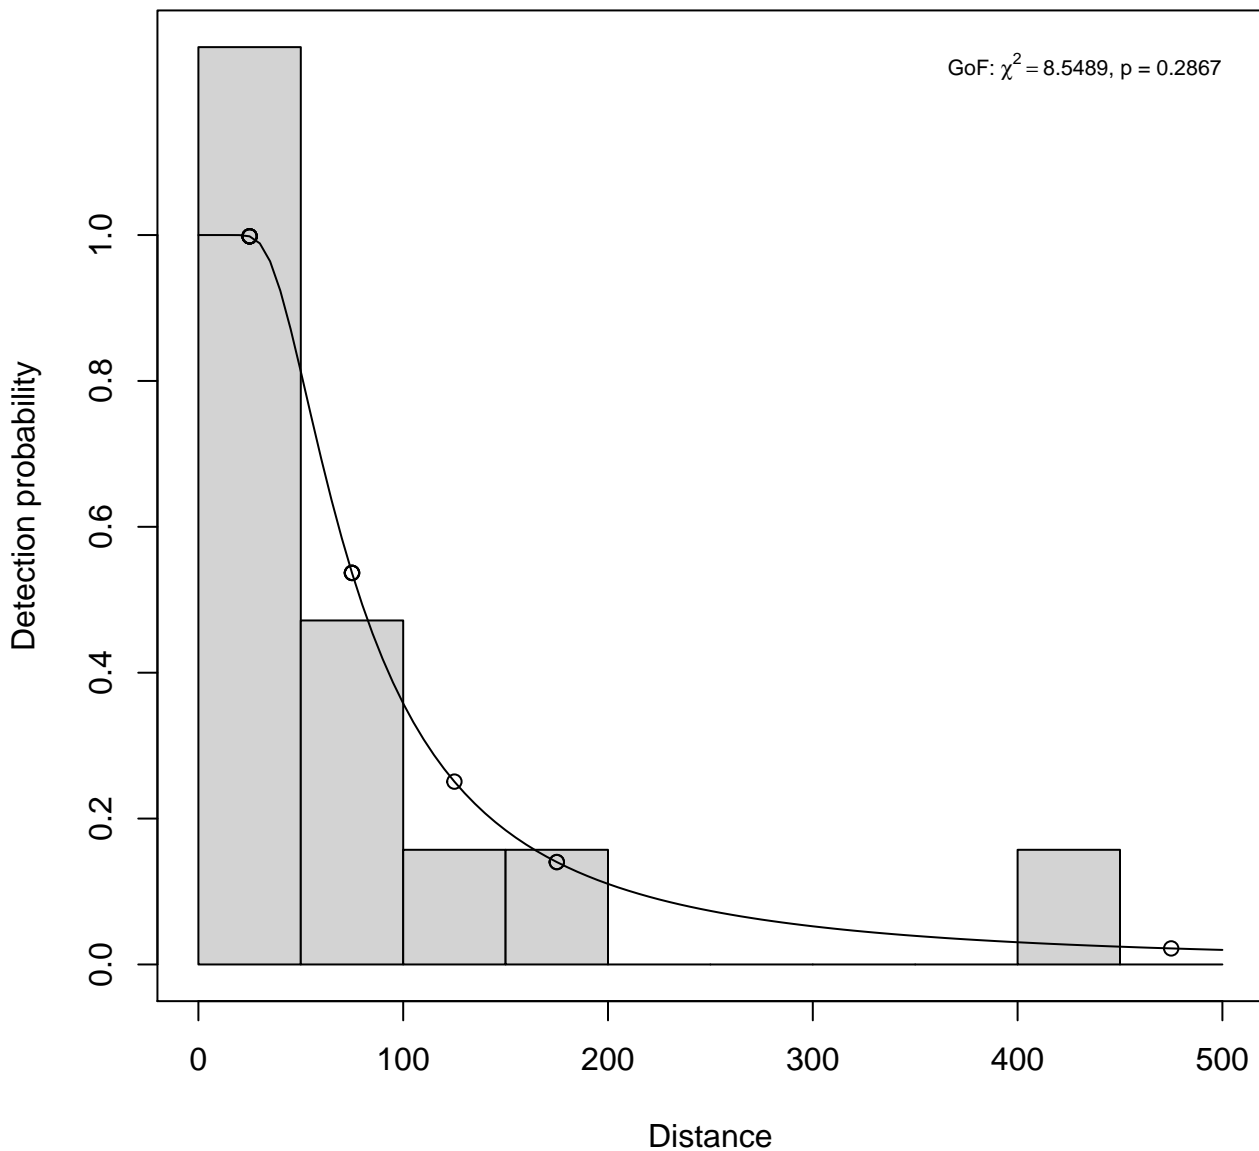

*Pionus senilis* – Isthmian–Pacific moist forests – Costa Rica (N = 14, key function = hr)

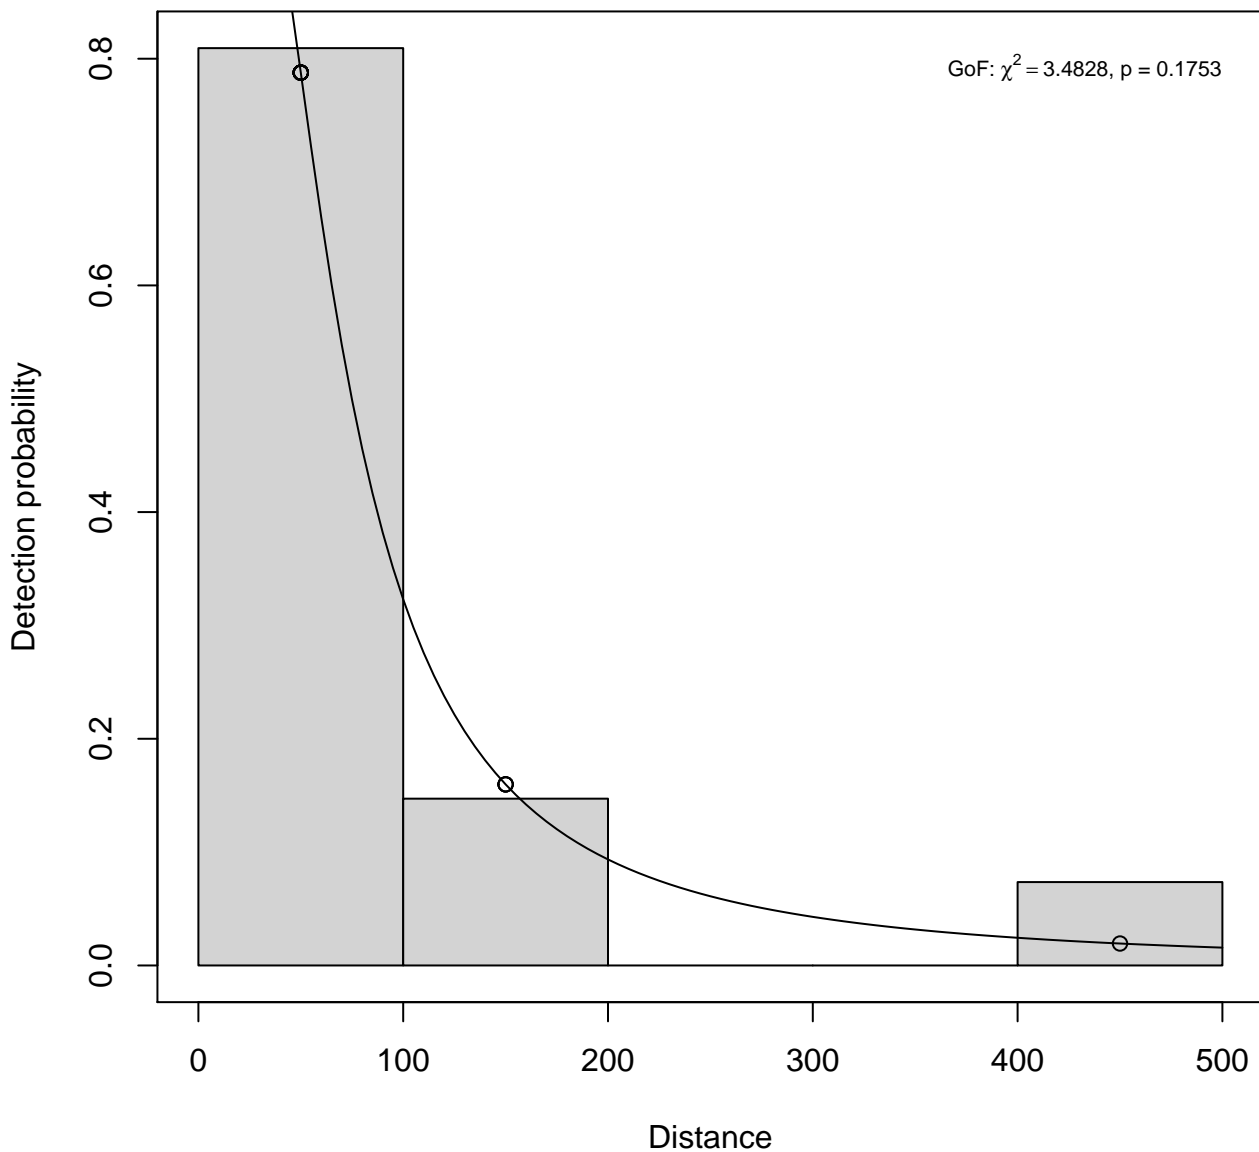

Supplement: s1 [file s1]
