# Supplementary material
Source: MDPI journal article supplement (https://www.mdpi.com/1424-2818/13/7/300)

# ***Thectocercus acuticaudatus* – Dry Chaco – Paraguay**

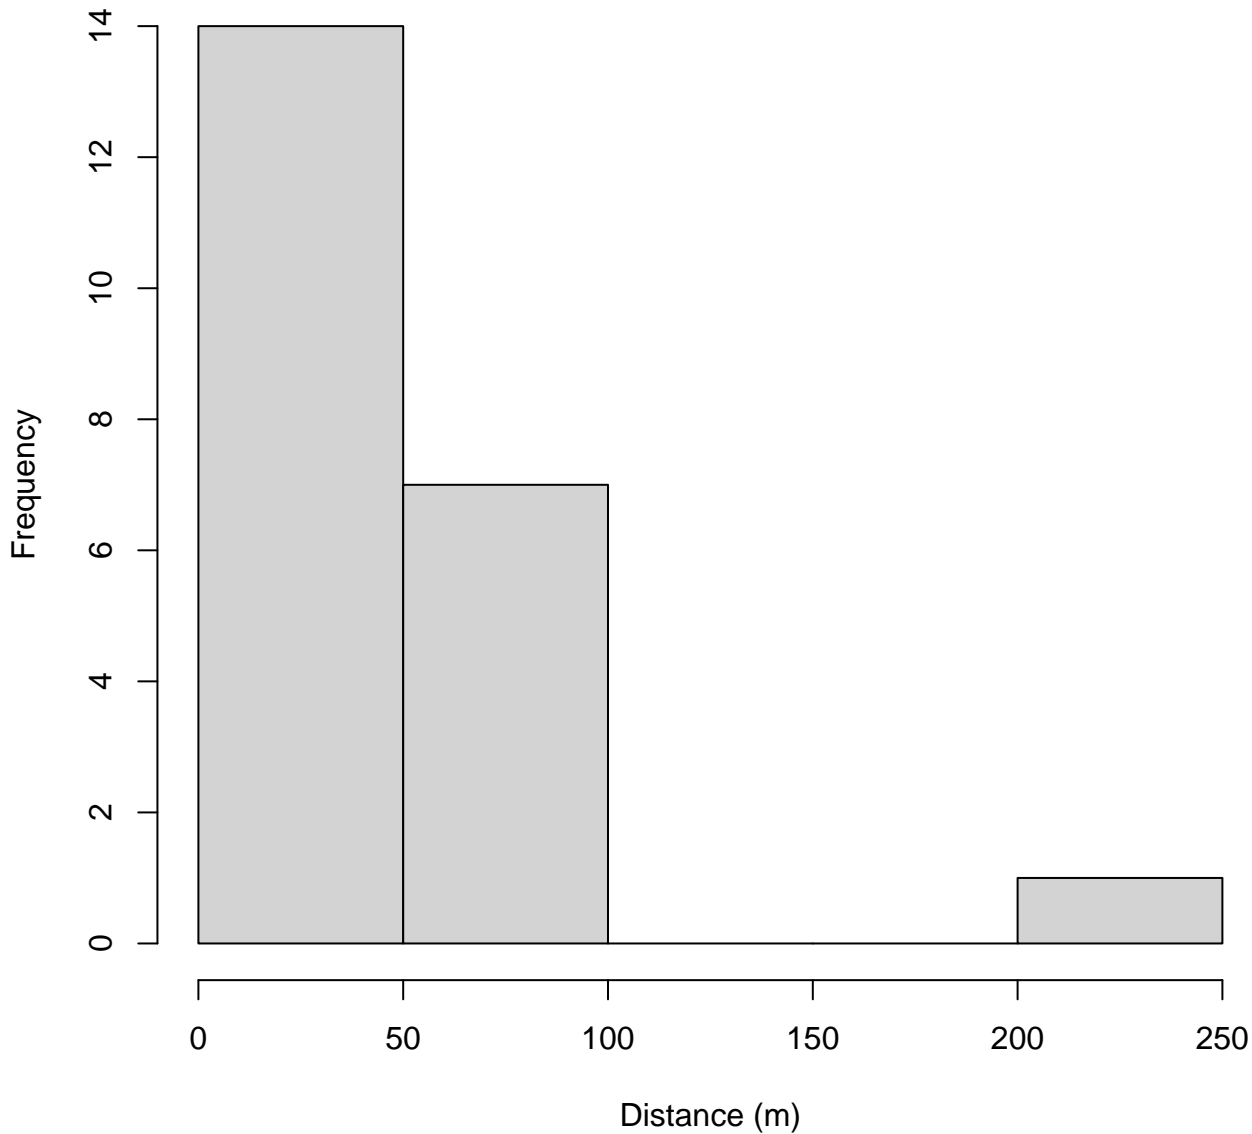

# **Thectocercus acuticaudatus – Dry Chaco – Paraguay**

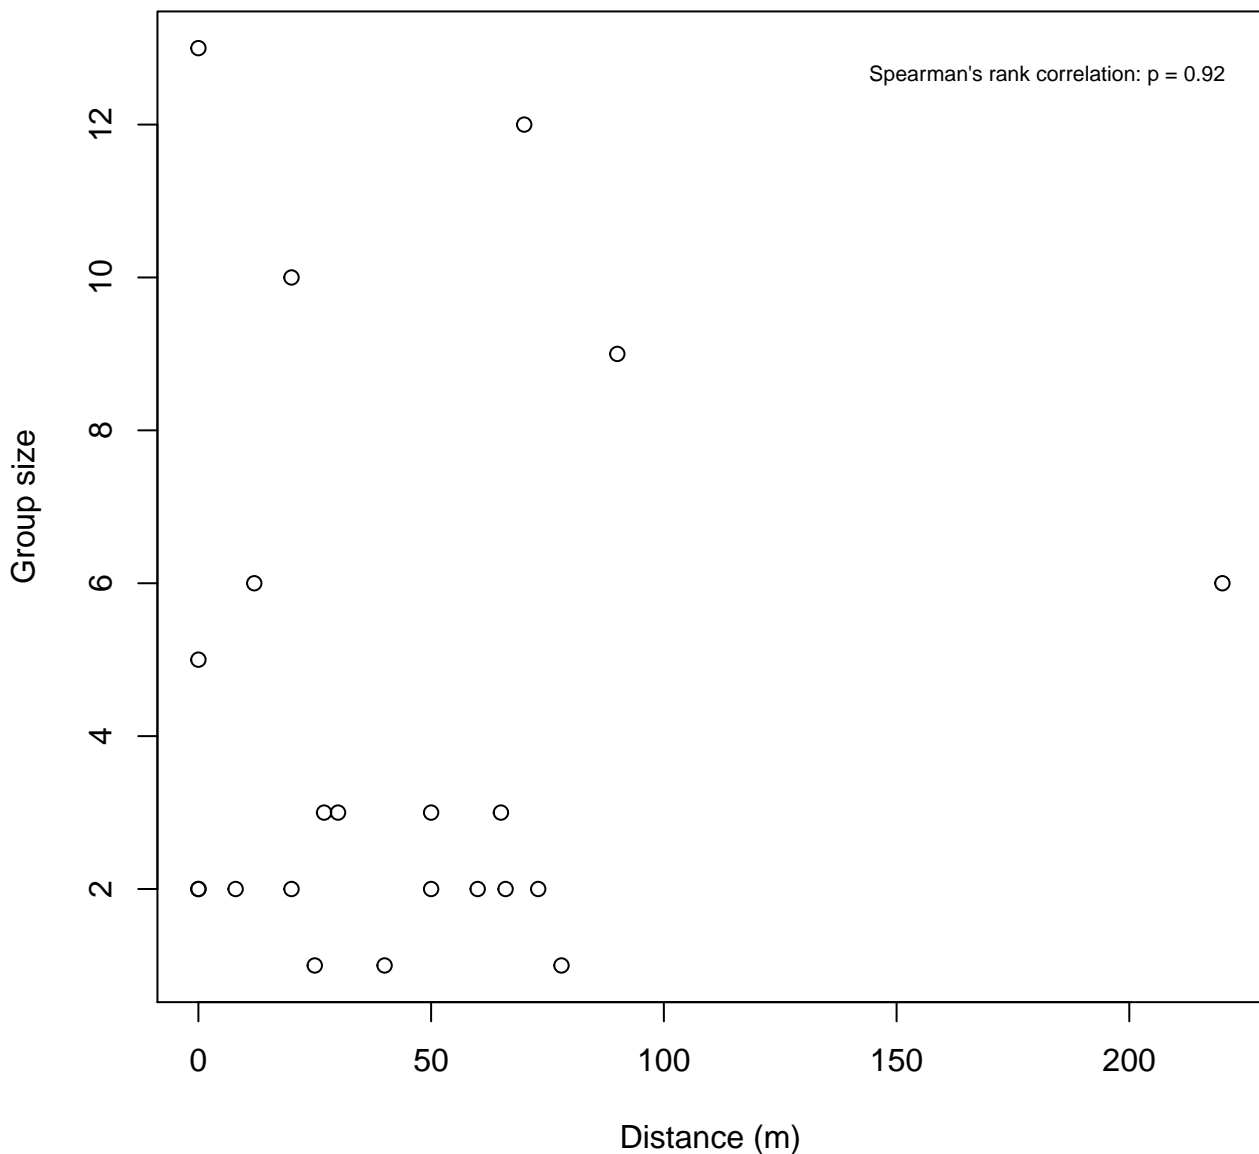

Thectocercus acuticaudatus – Dry Chaco – Paraguay (N = 22, key function = hr)

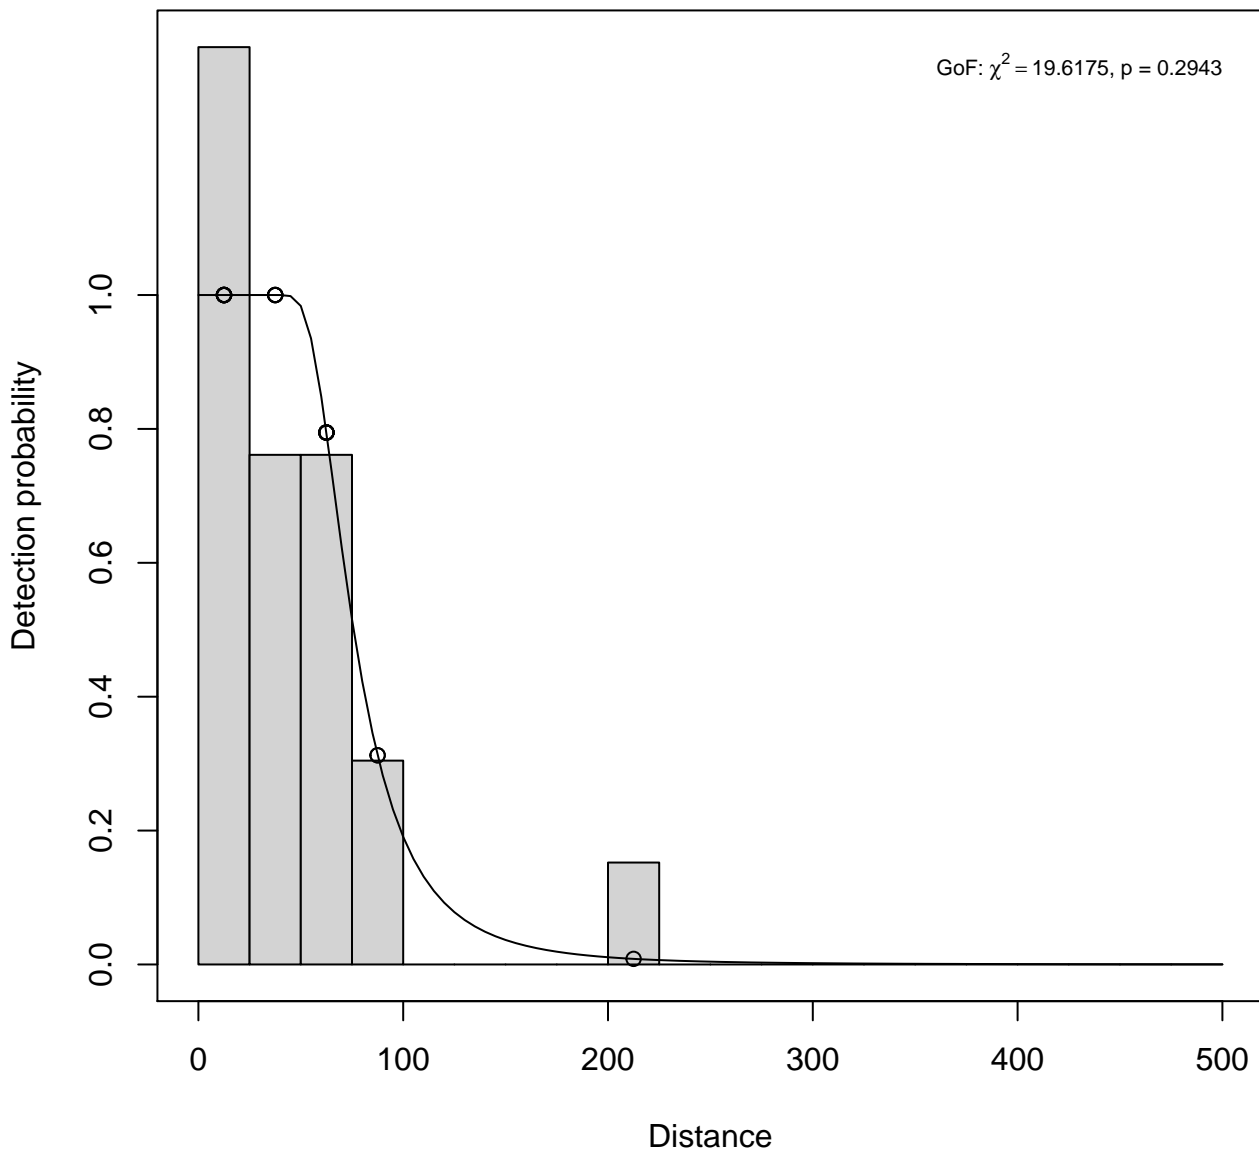

*Thectocercus acuticaudatus* – Dry Chaco – Paraguay (N = 22, key function = hr)

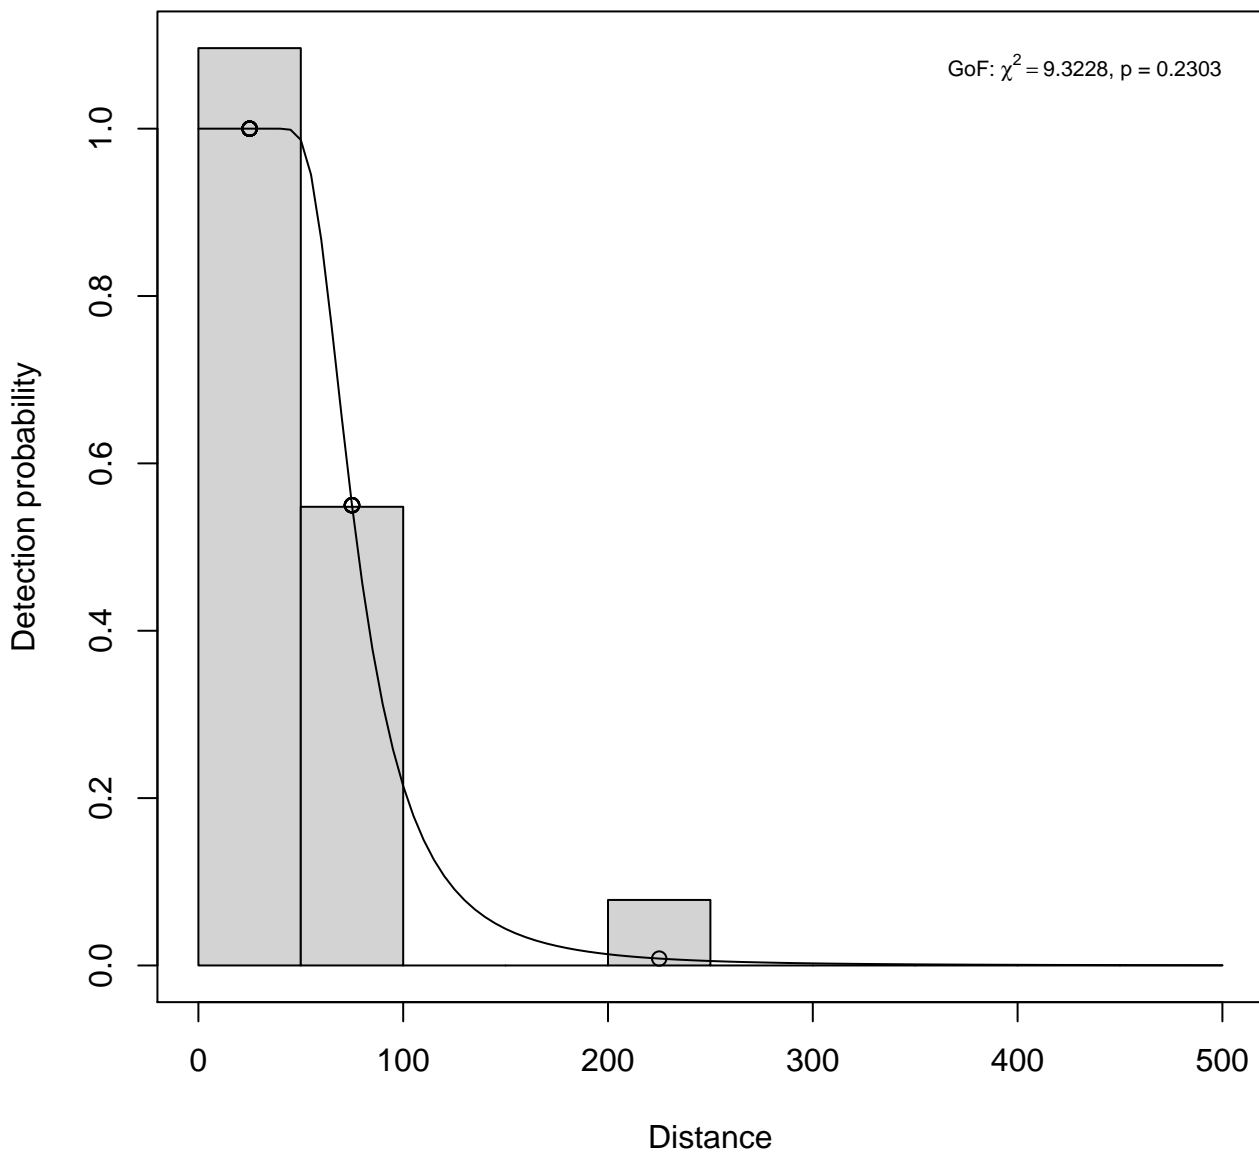

Thectocercus acuticaudatus – Dry Chaco – Paraguay (N = 22, key function = hr)

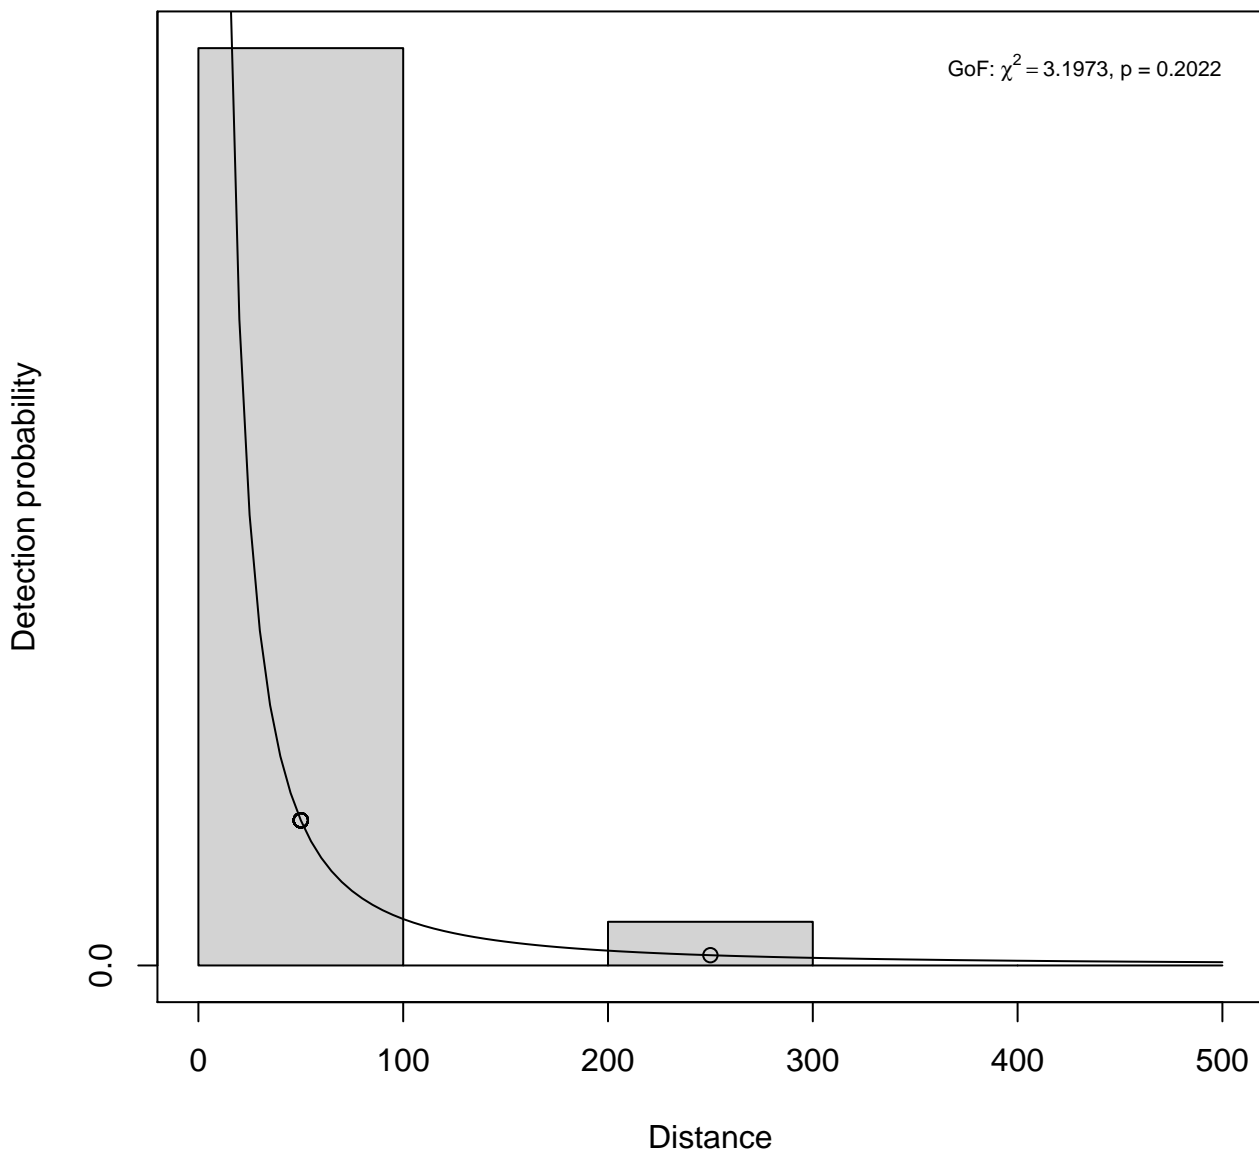

Supplement: s1 [file s1]
