# Supplementary material
Source: MDPI journal article supplement (https://www.mdpi.com/1424-2818/13/7/300)

# **Thectocercus acuticaudatus – Southern Andean Yungas – Bolivia**

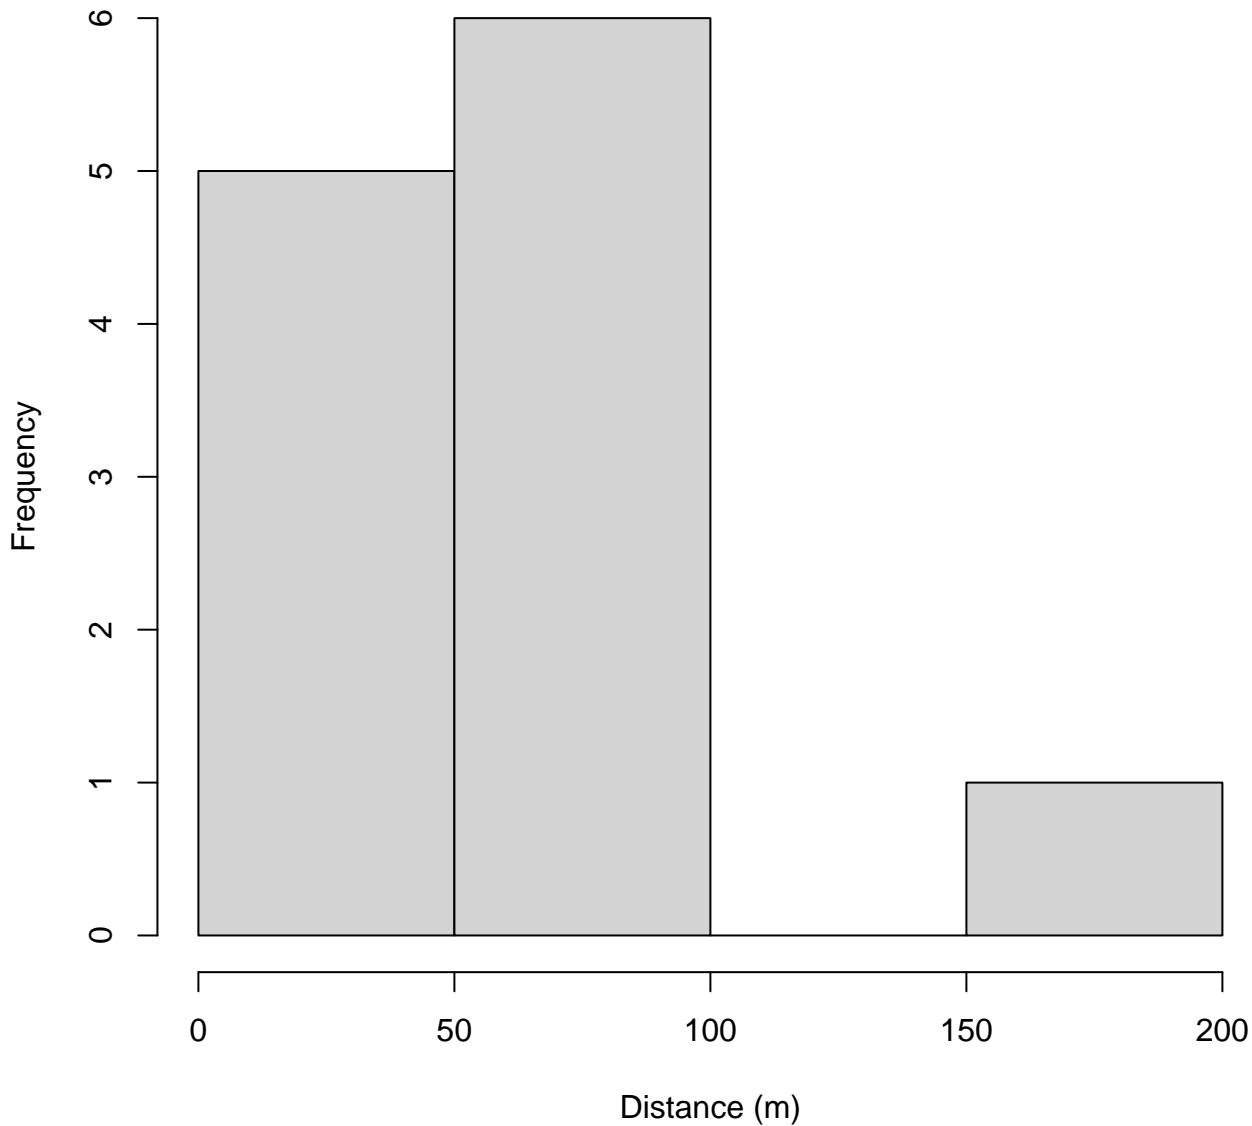

# **Thectocercus acuticaudatus – Southern Andean Yungas – Bolivia**

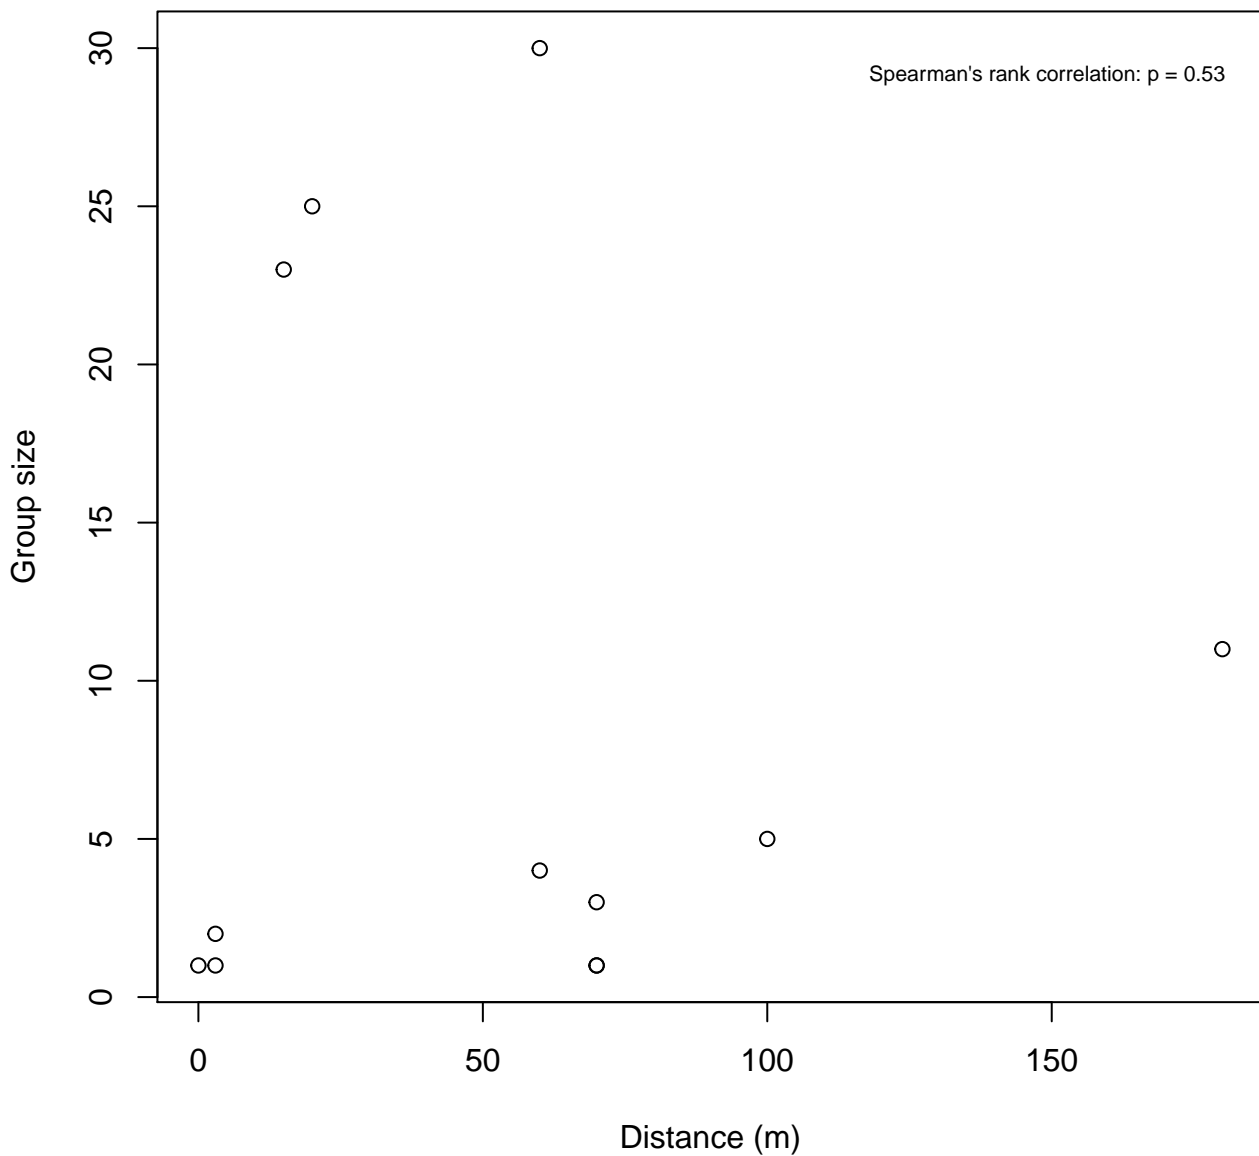

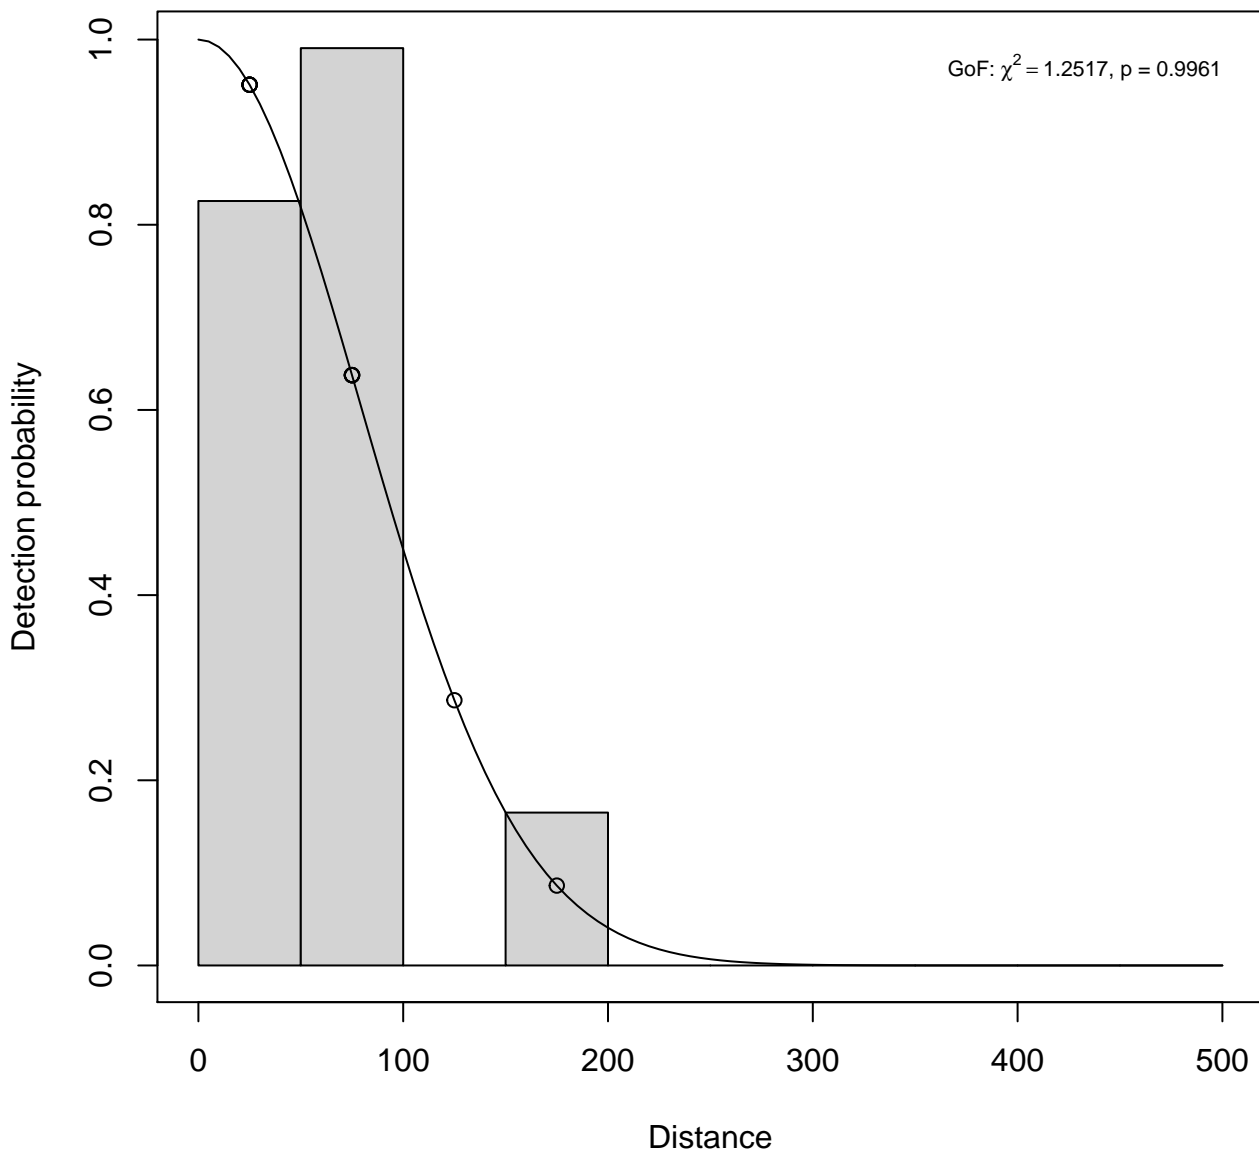

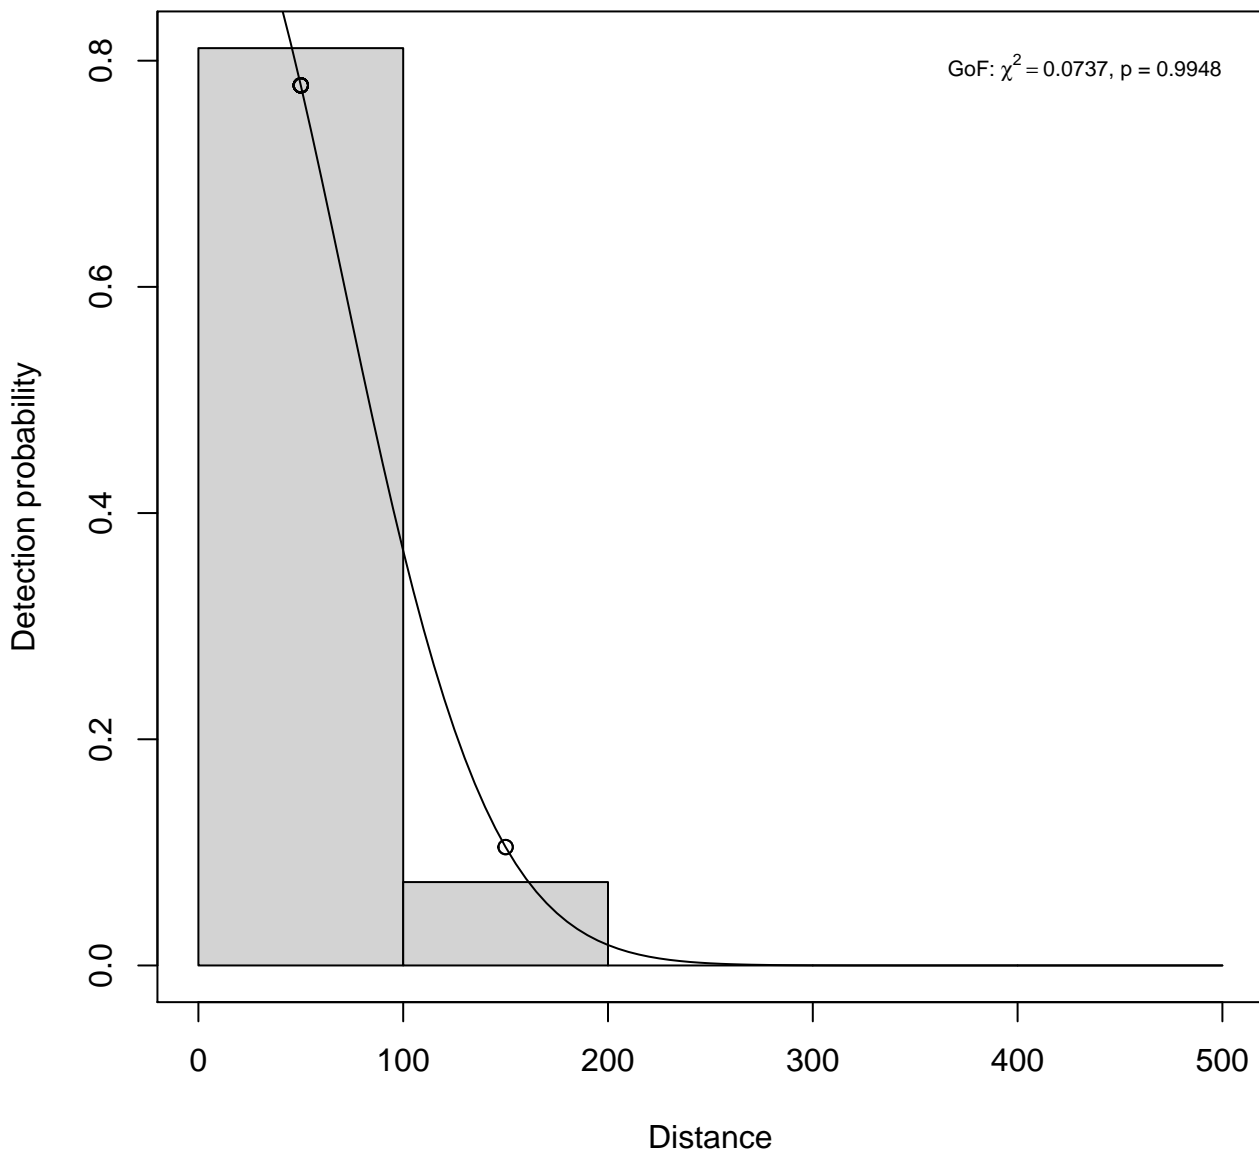

*Tectocercus acuticaudatus* – Southern Andean Yungas – Bolivia (N = 12, key function = hn)

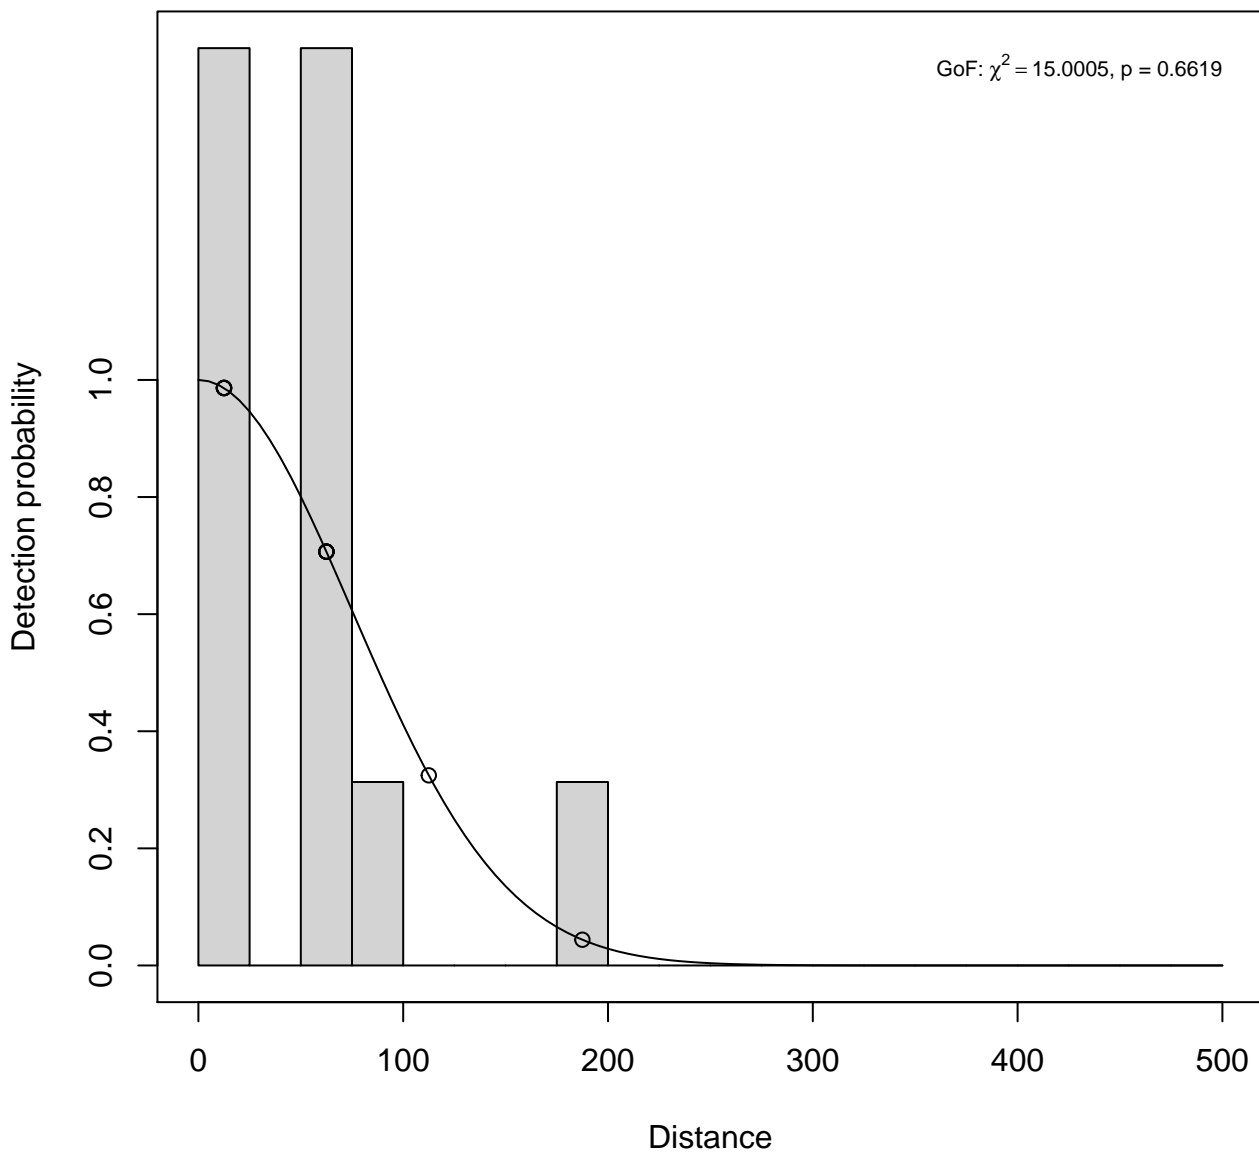

Supplement: s1 [file s1]
