# Supplementary material
Source: MDPI journal article supplement (https://www.mdpi.com/1424-2818/13/7/300)

# Pionus menstruus – Isthmian–Atlantic moist forests – Panama

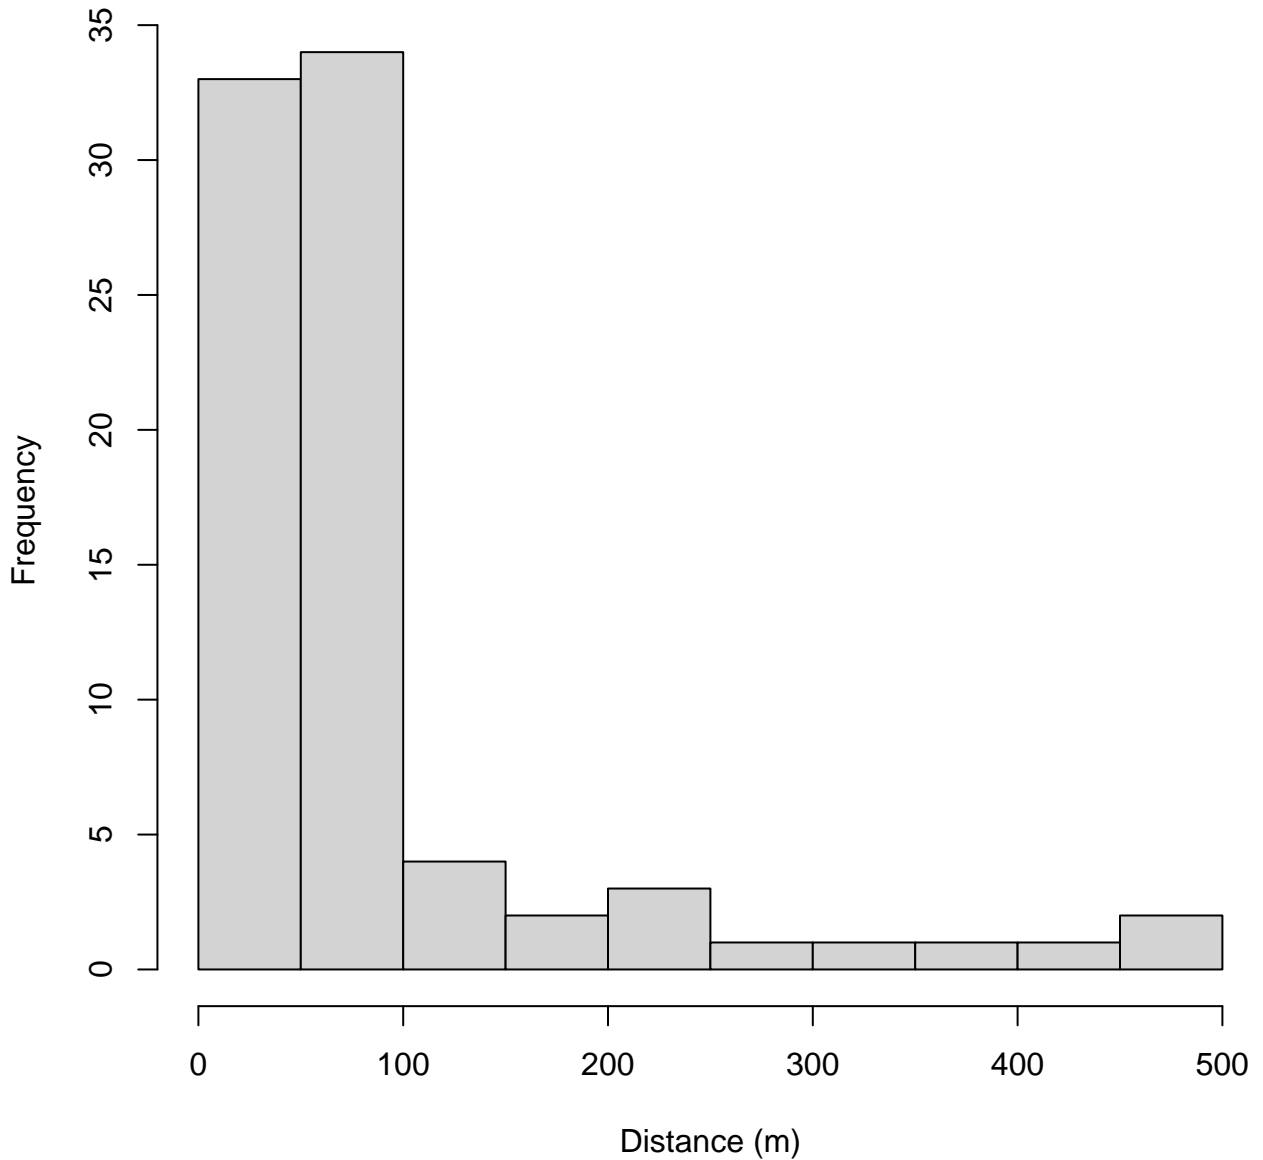

# Pionus menstruus – Isthmian–Atlantic moist forests – Panama

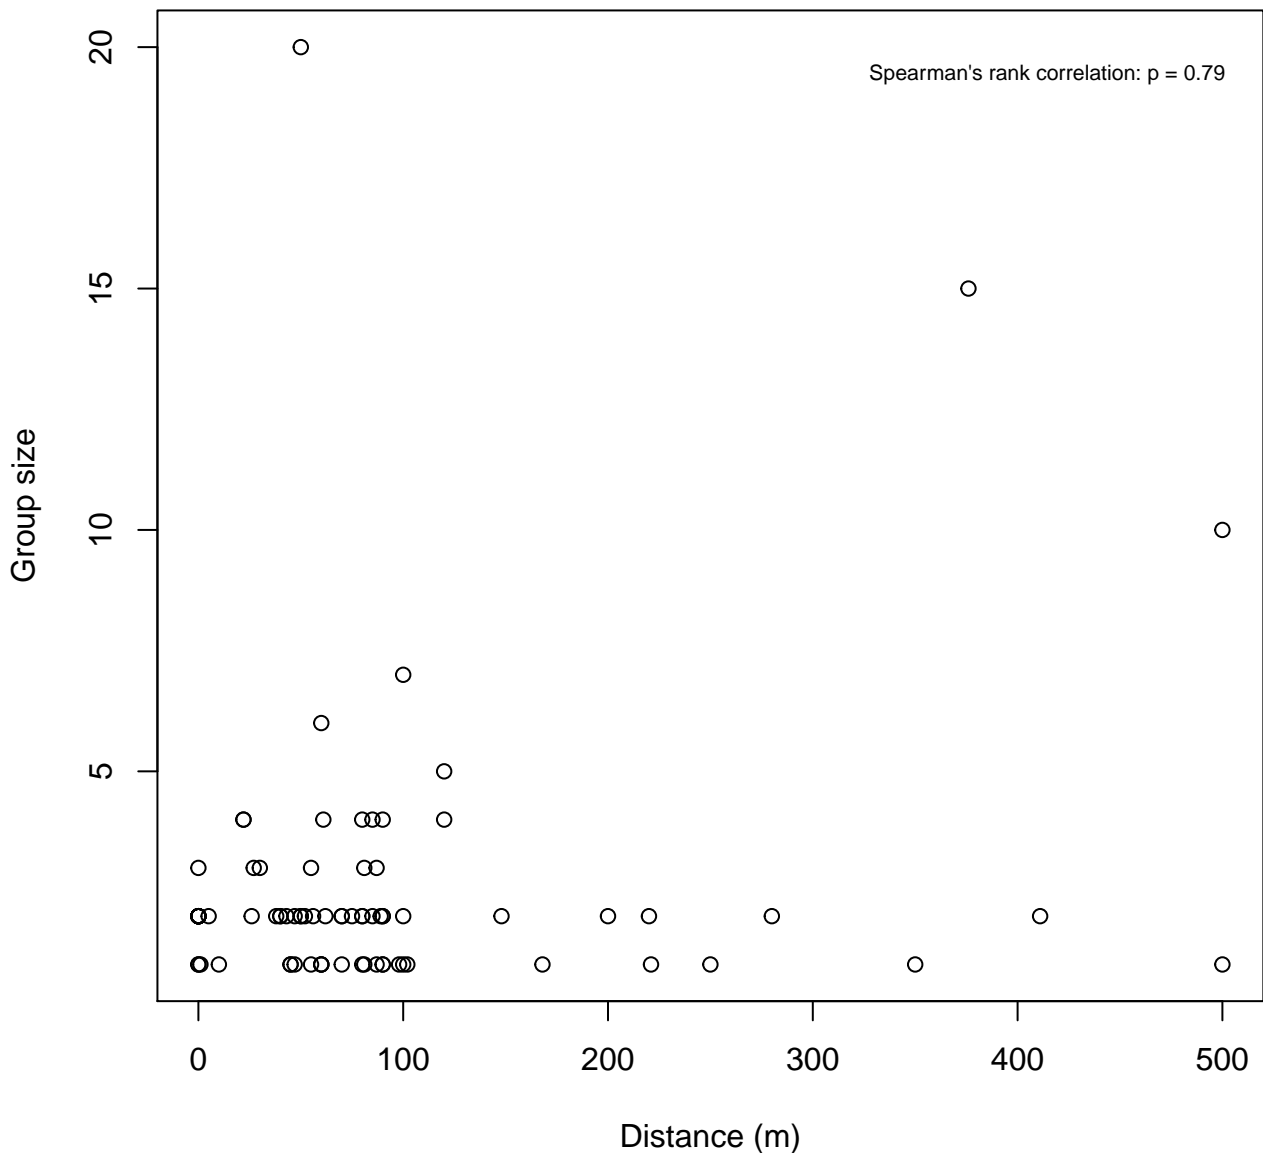

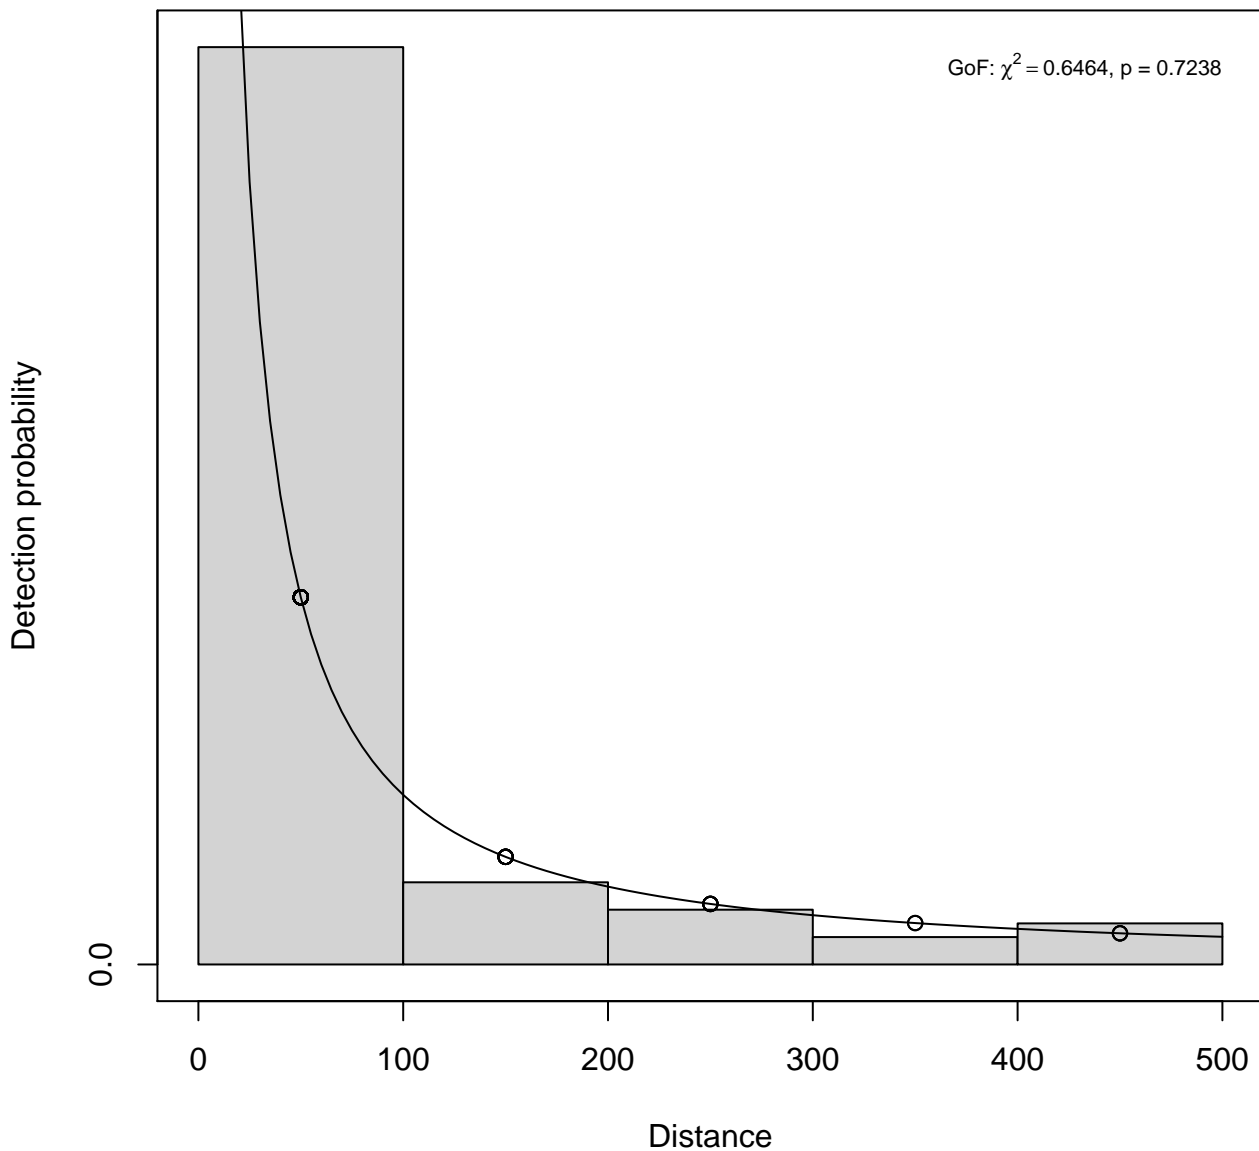

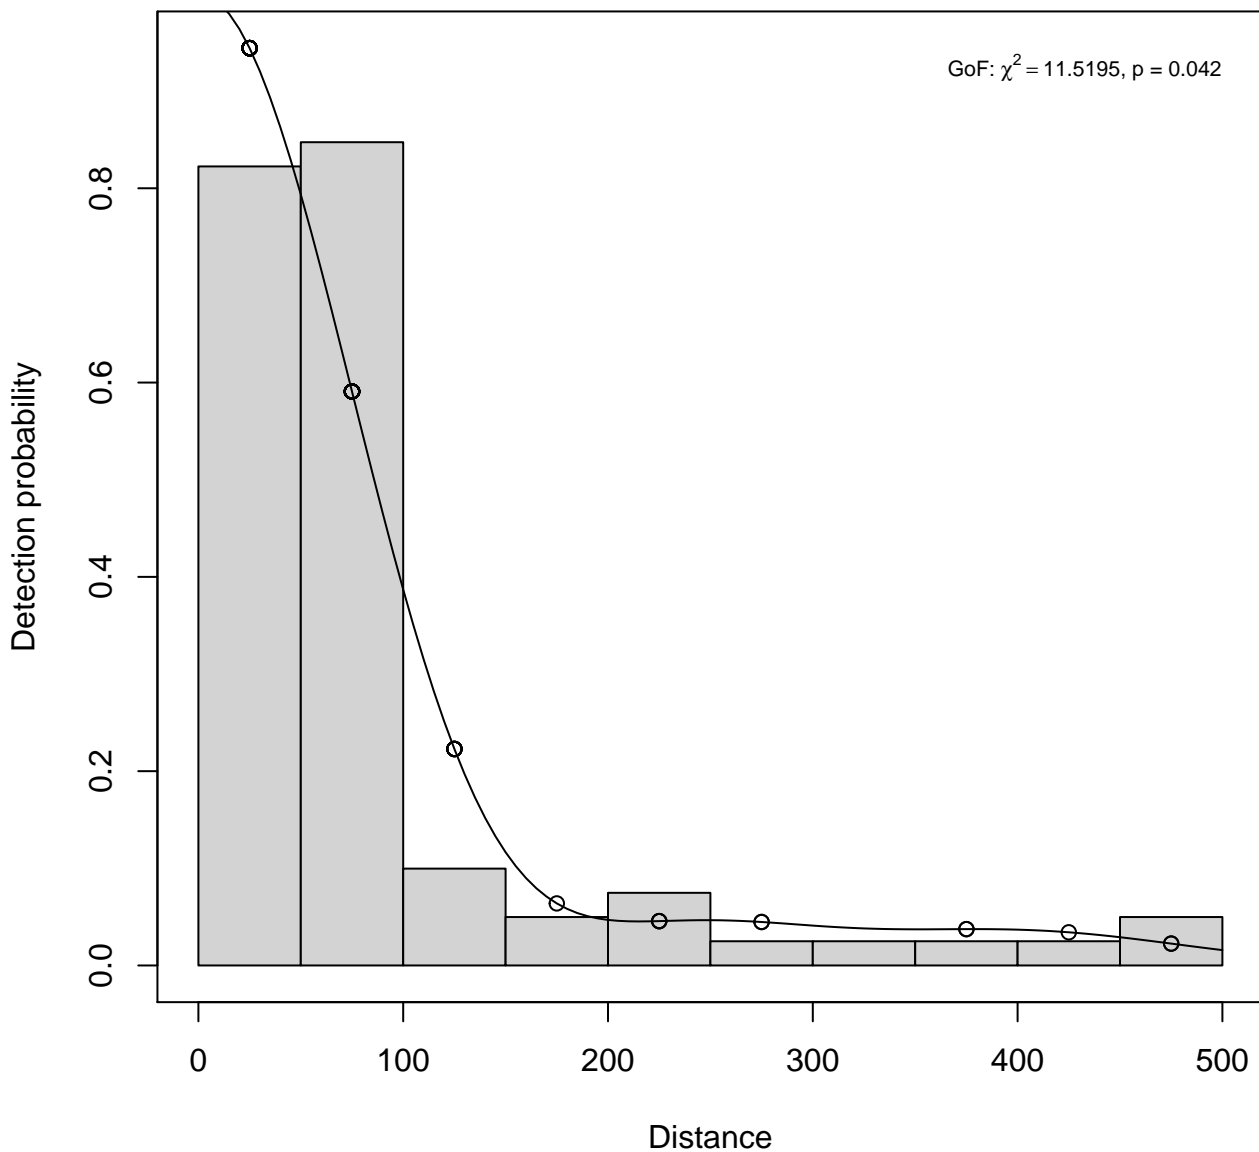

Pionus menstruus – Isthmian–Atlantic moist forests – Panama (N = 82, key function = hr)

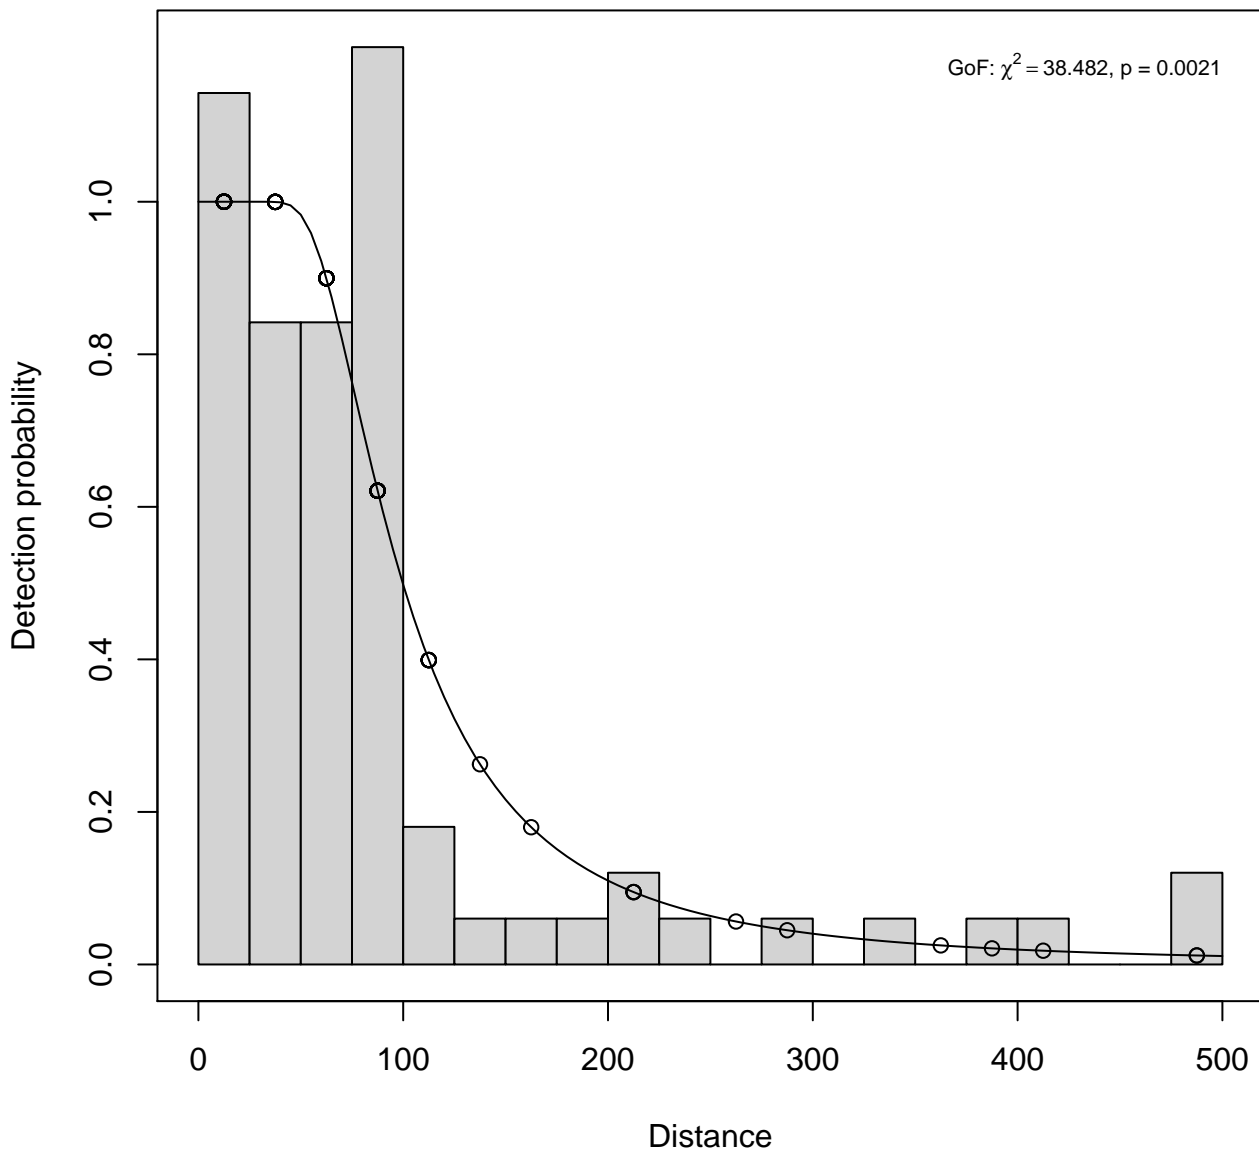

Supplement: s1 [file s1]
