# Supplementary material
Source: MDPI journal article supplement (https://www.mdpi.com/1424-2818/13/7/300)

# **Psittacula krameri – Himalayan subtropical pine forests – India**

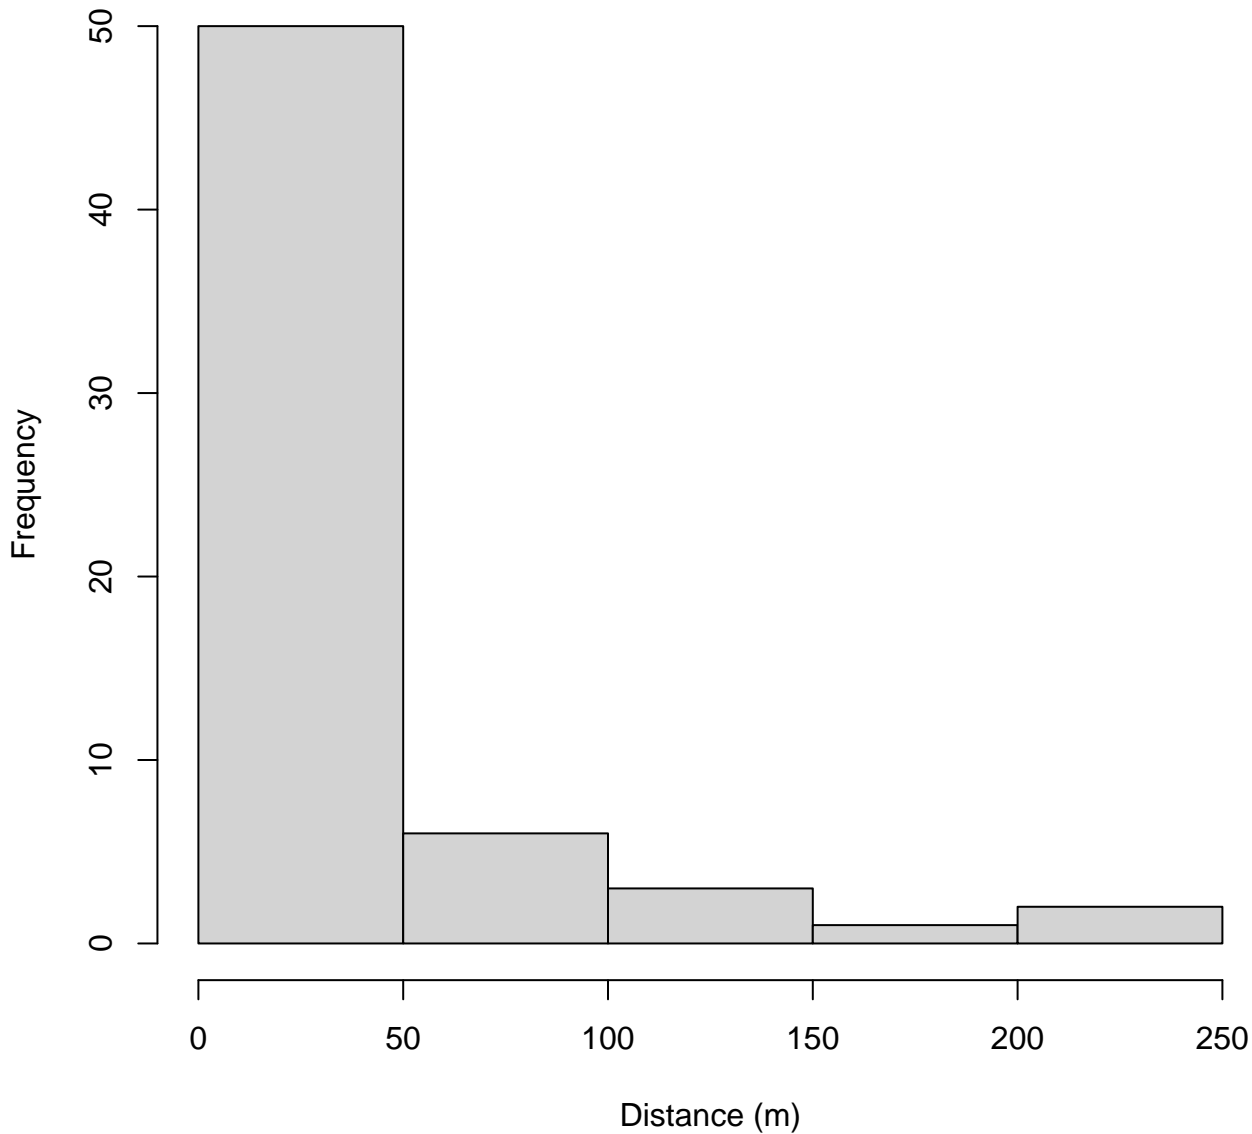

# Psittacula krameri – Himalayan subtropical pine forests – India

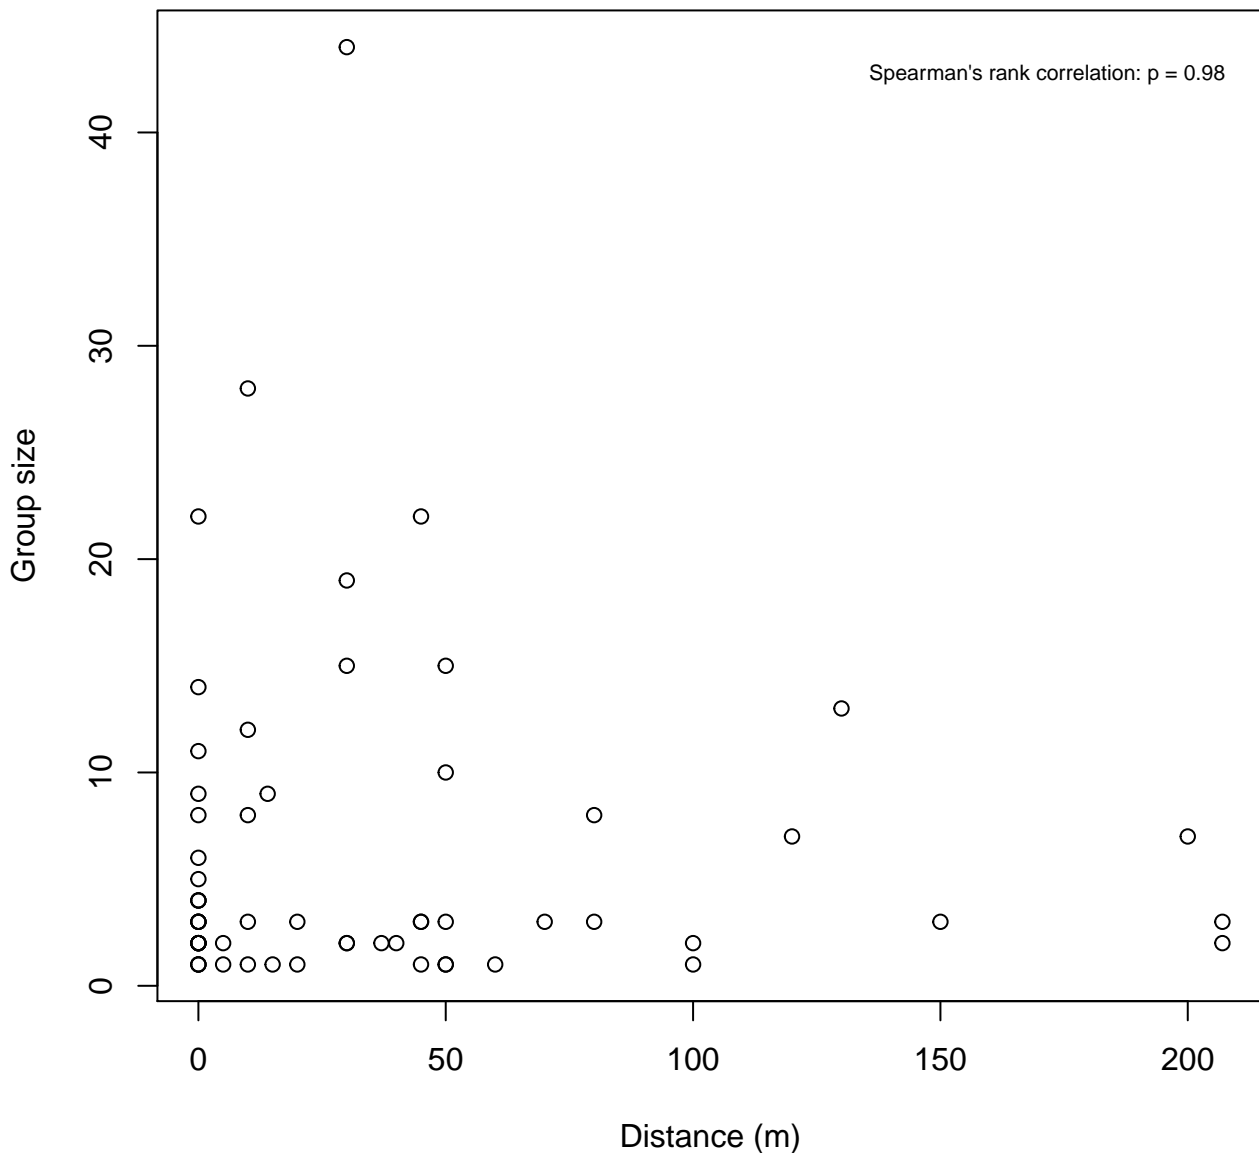

*Psittacula krameri* – Himalayan subtropical pine forests – India (N = 62, key function = hr)

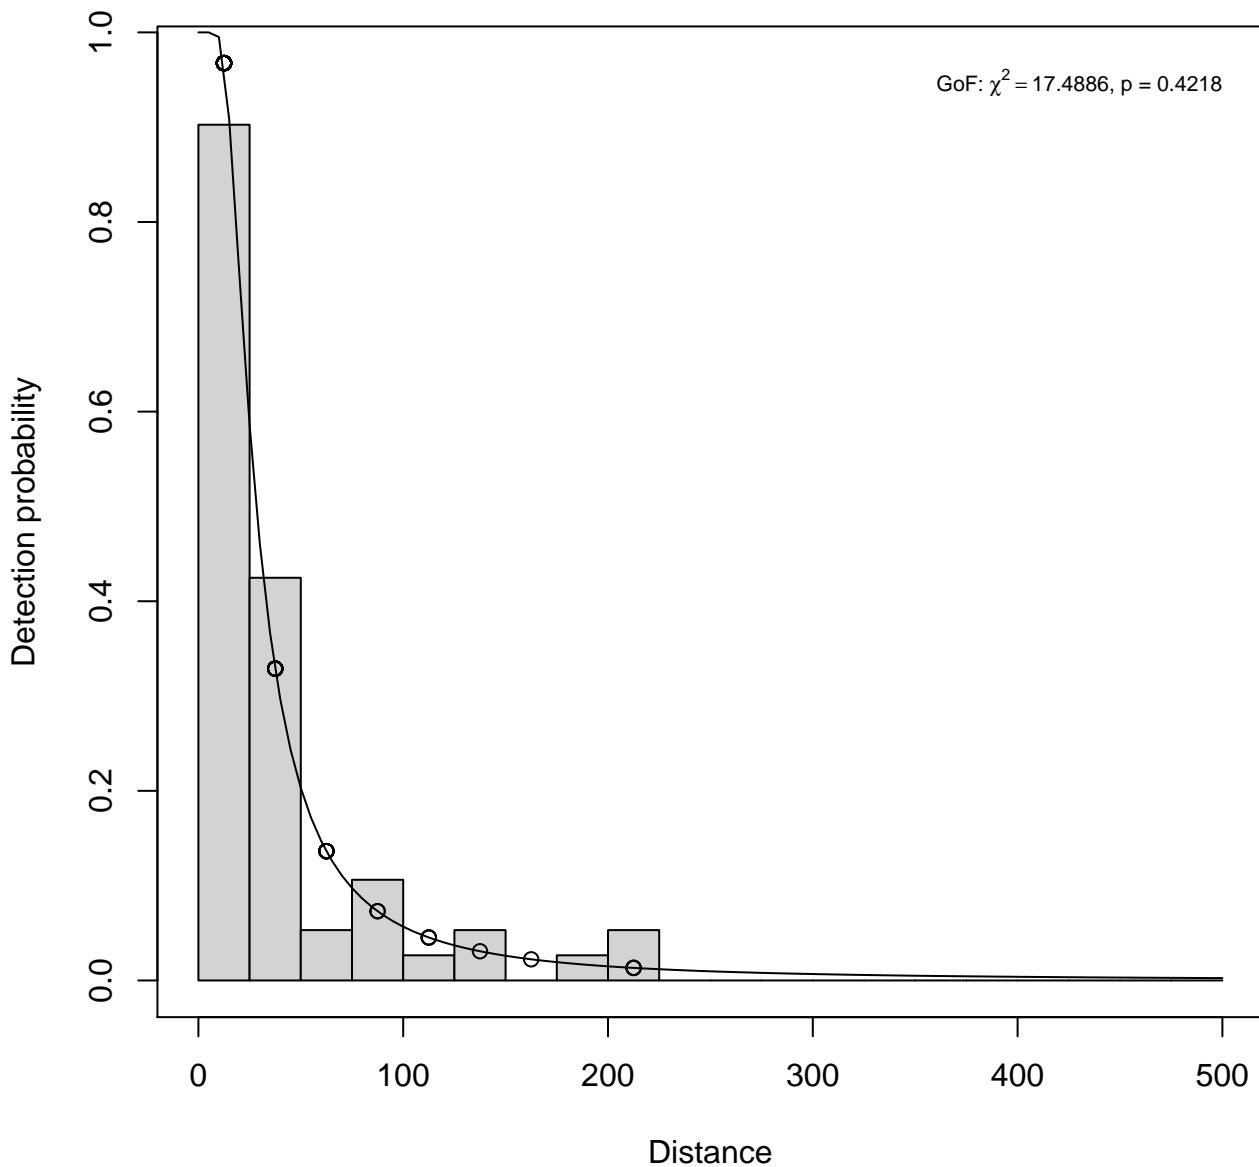

*Psittacula krameri* – Himalayan subtropical pine forests – India (N = 62, key function = hr)

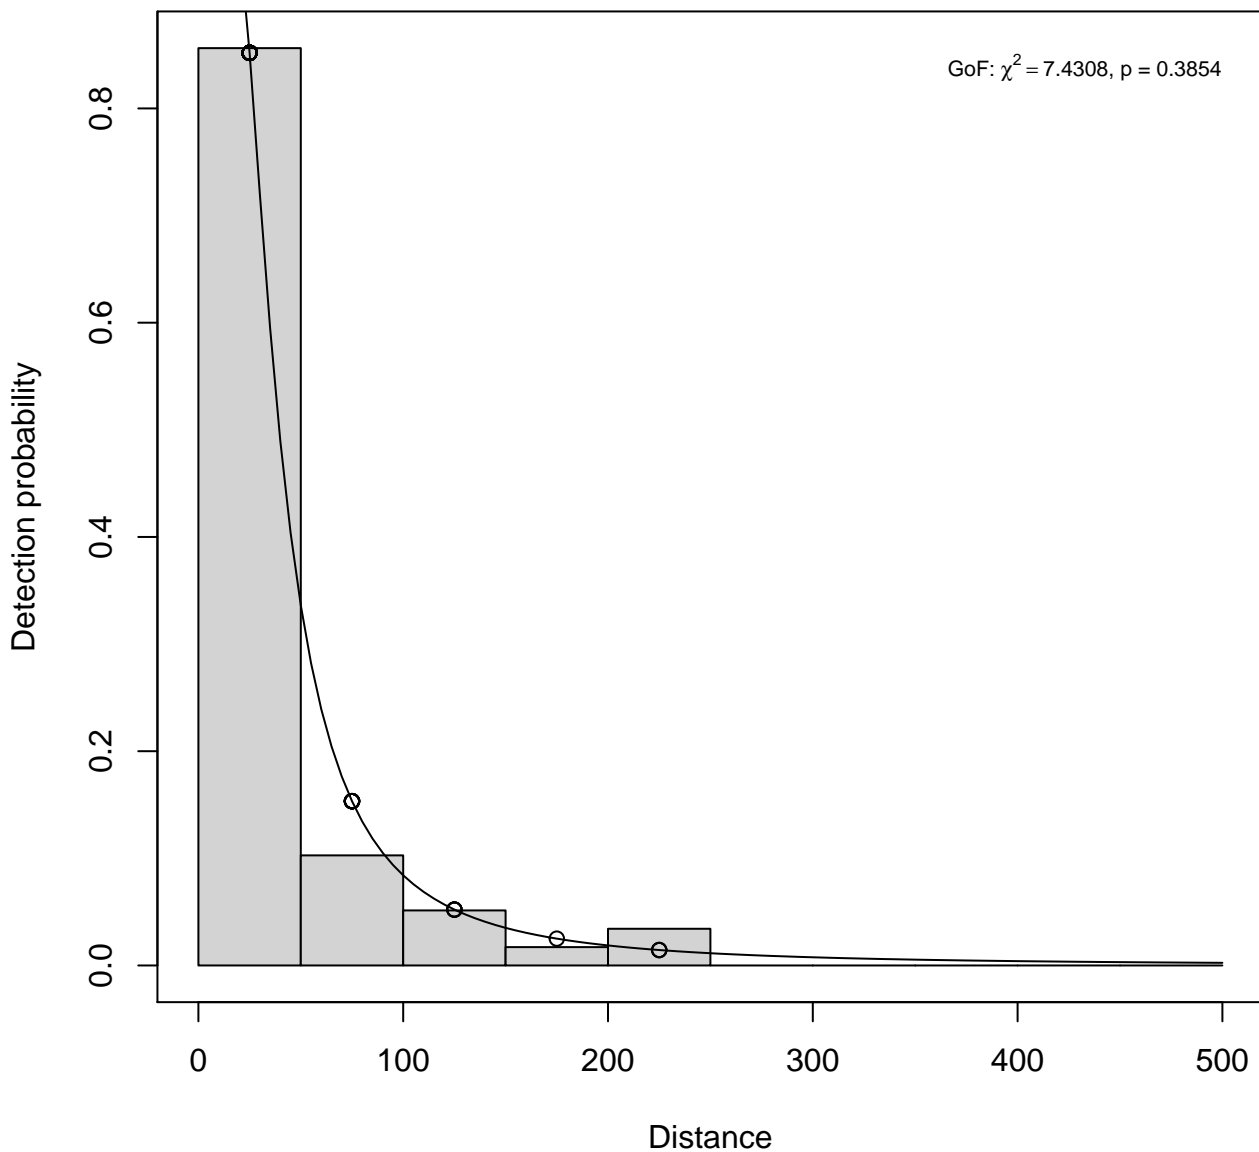

*Psittacula krameri* – Himalayan subtropical pine forests – India (N = 62, key function = hr)

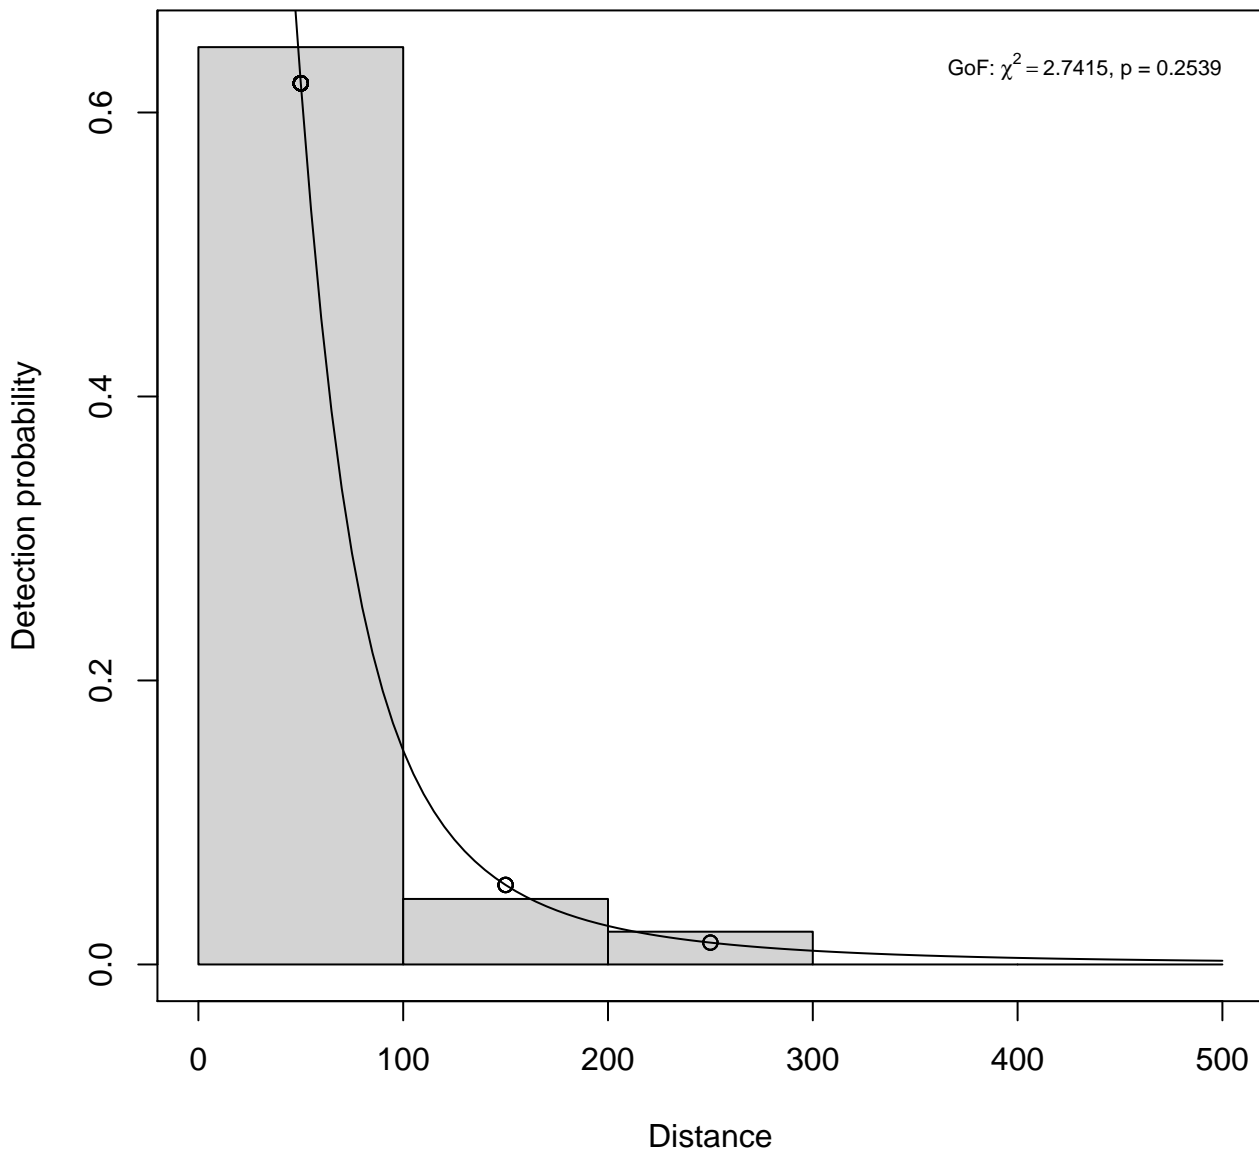

Supplement: s1 [file s1]
