# Supplementary material
Source: MDPI journal article supplement (https://www.mdpi.com/1424-2818/13/7/300)

# **Ara chloropterus – Beni savanna – Bolivia**

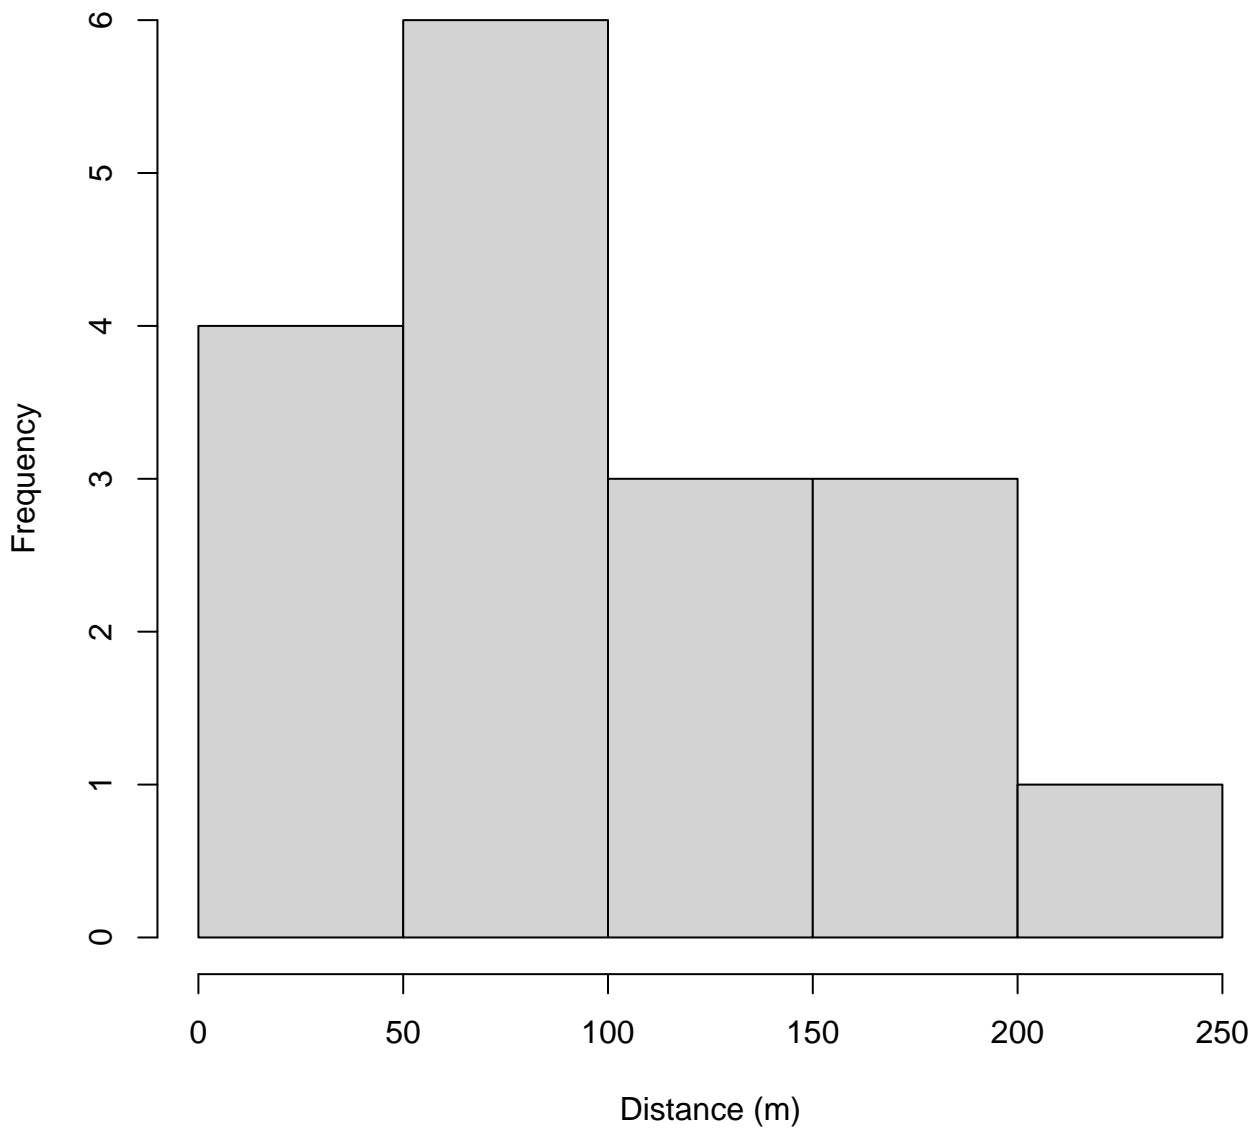

# Ara chloropterus – Beni savanna – Bolivia

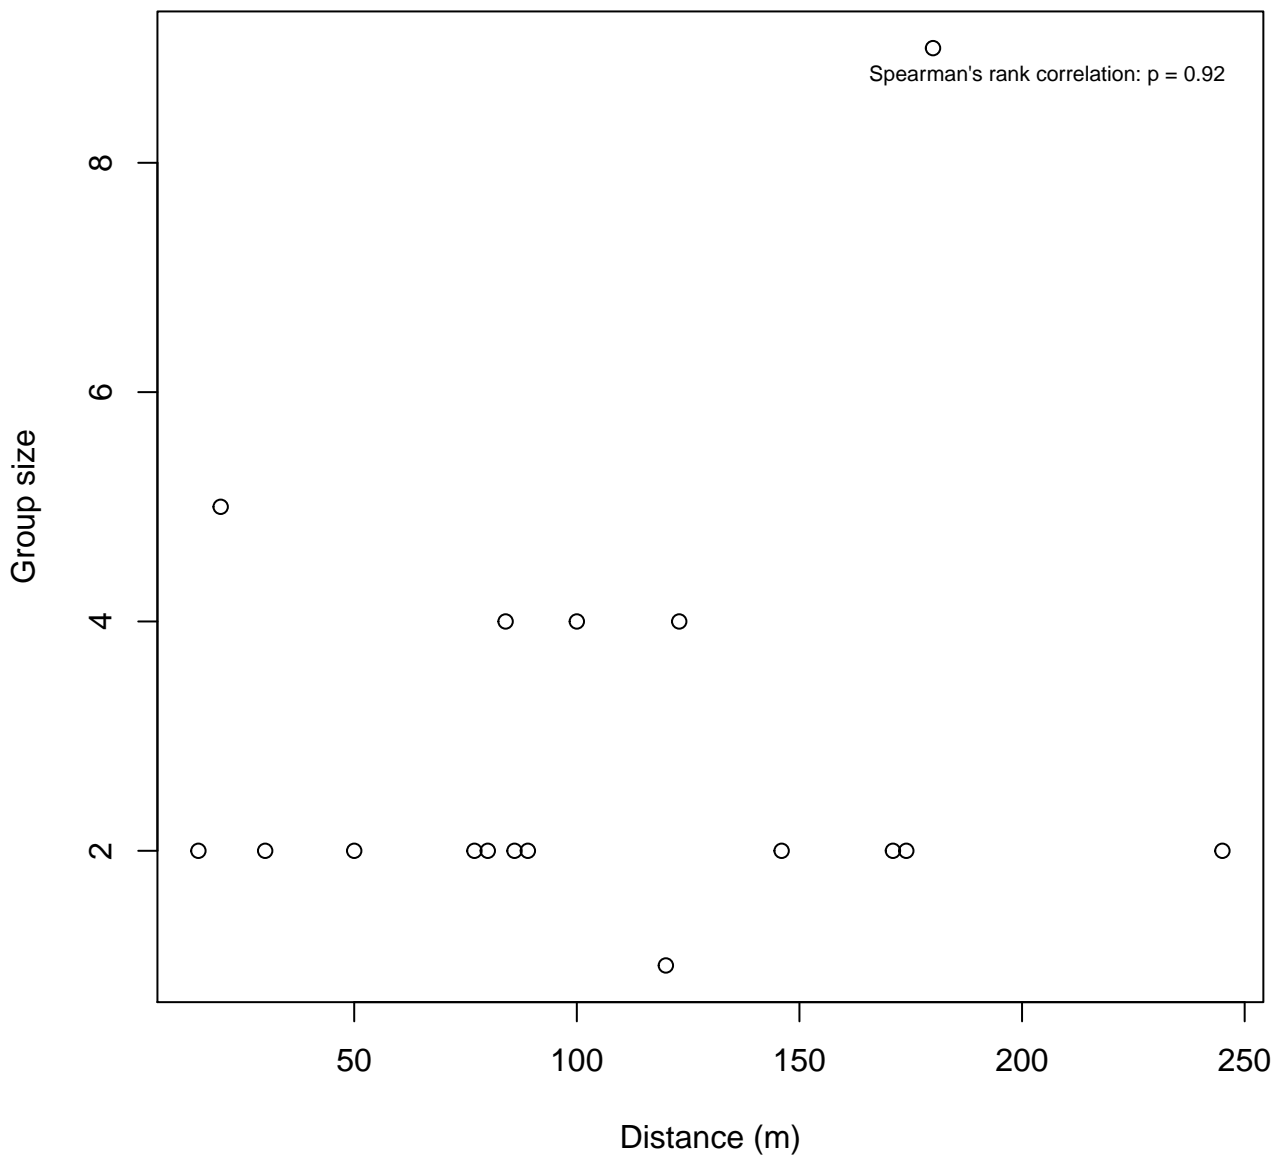

Ara chloropterus – Beni savanna – Bolivia (N = 17, key function = hr)

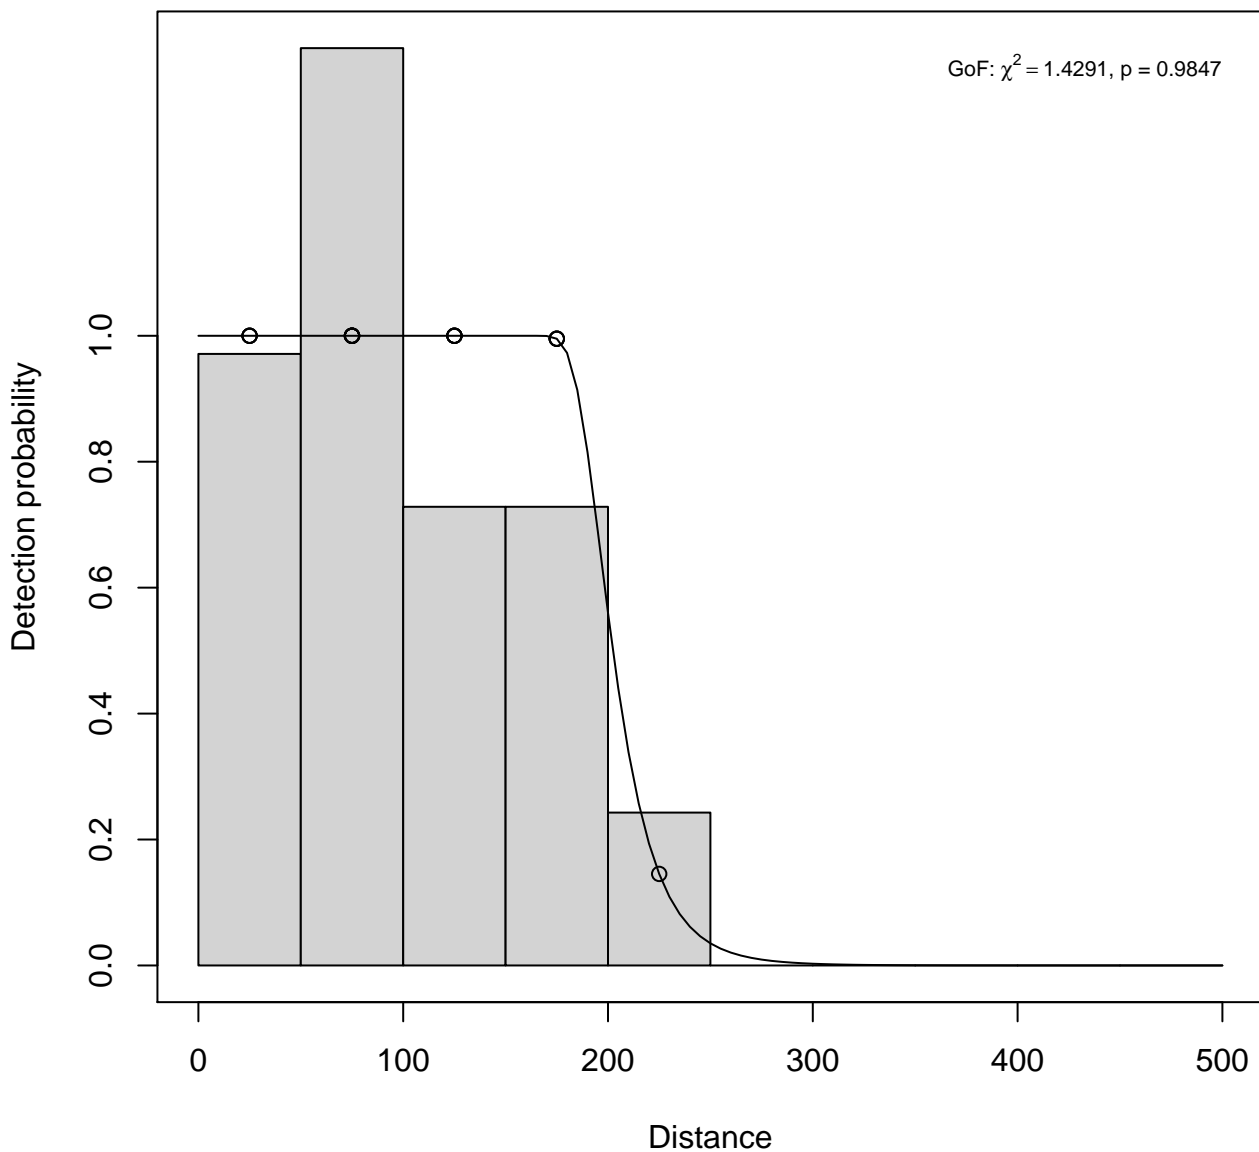

Ara chloropterus – Beni savanna – Bolivia (N = 17, key function = hn)

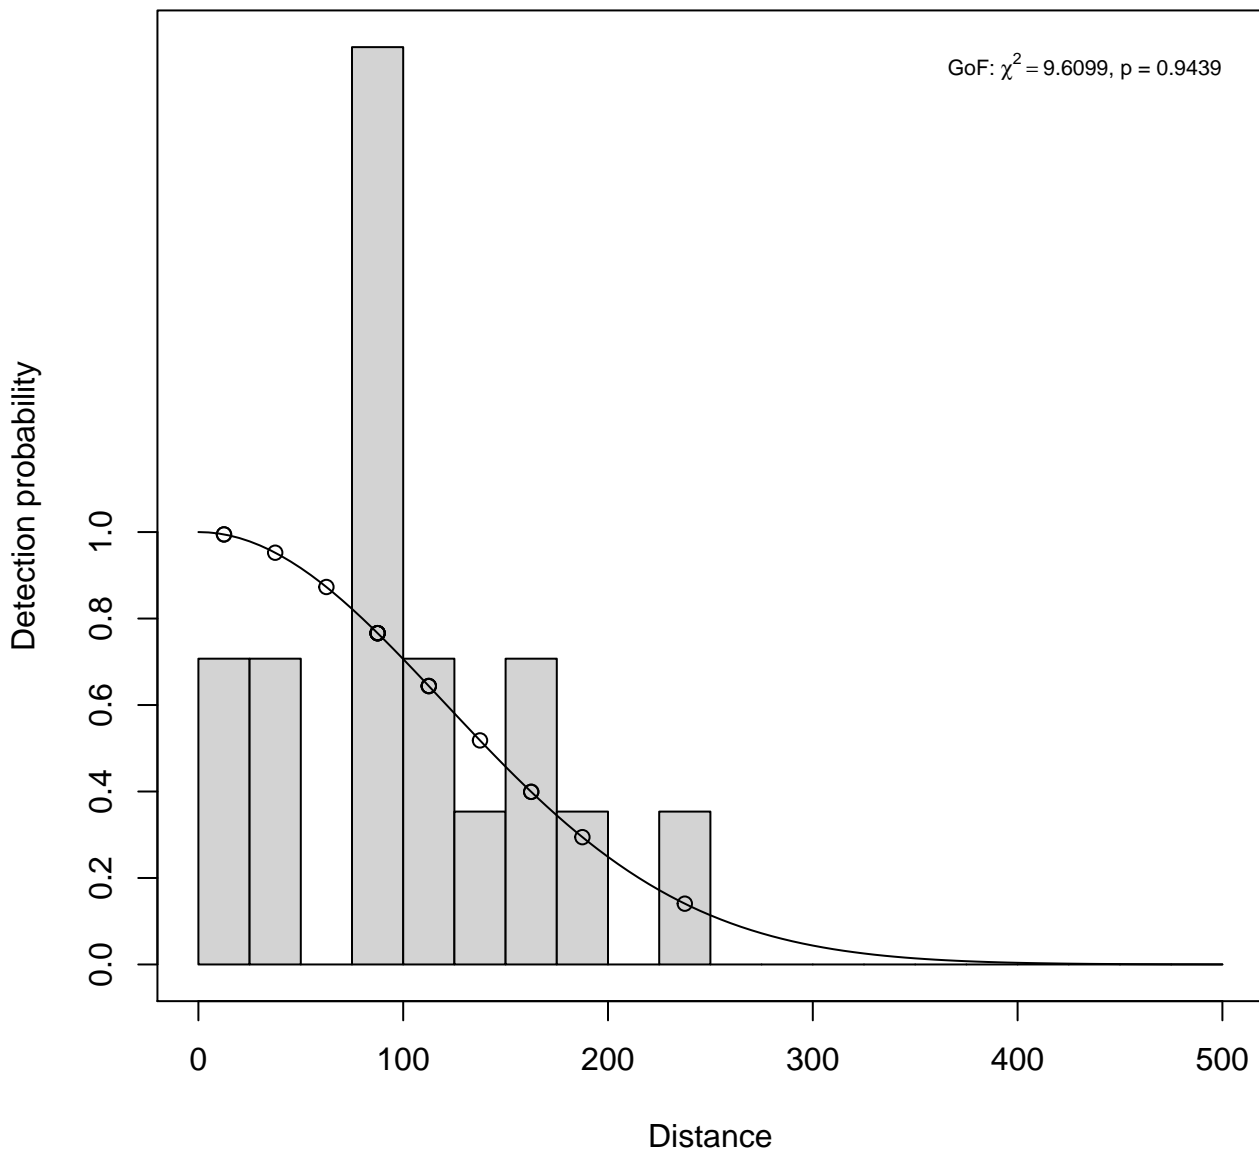

Ara chloropterus – Beni savanna – Bolivia (N = 17, key function = hn)

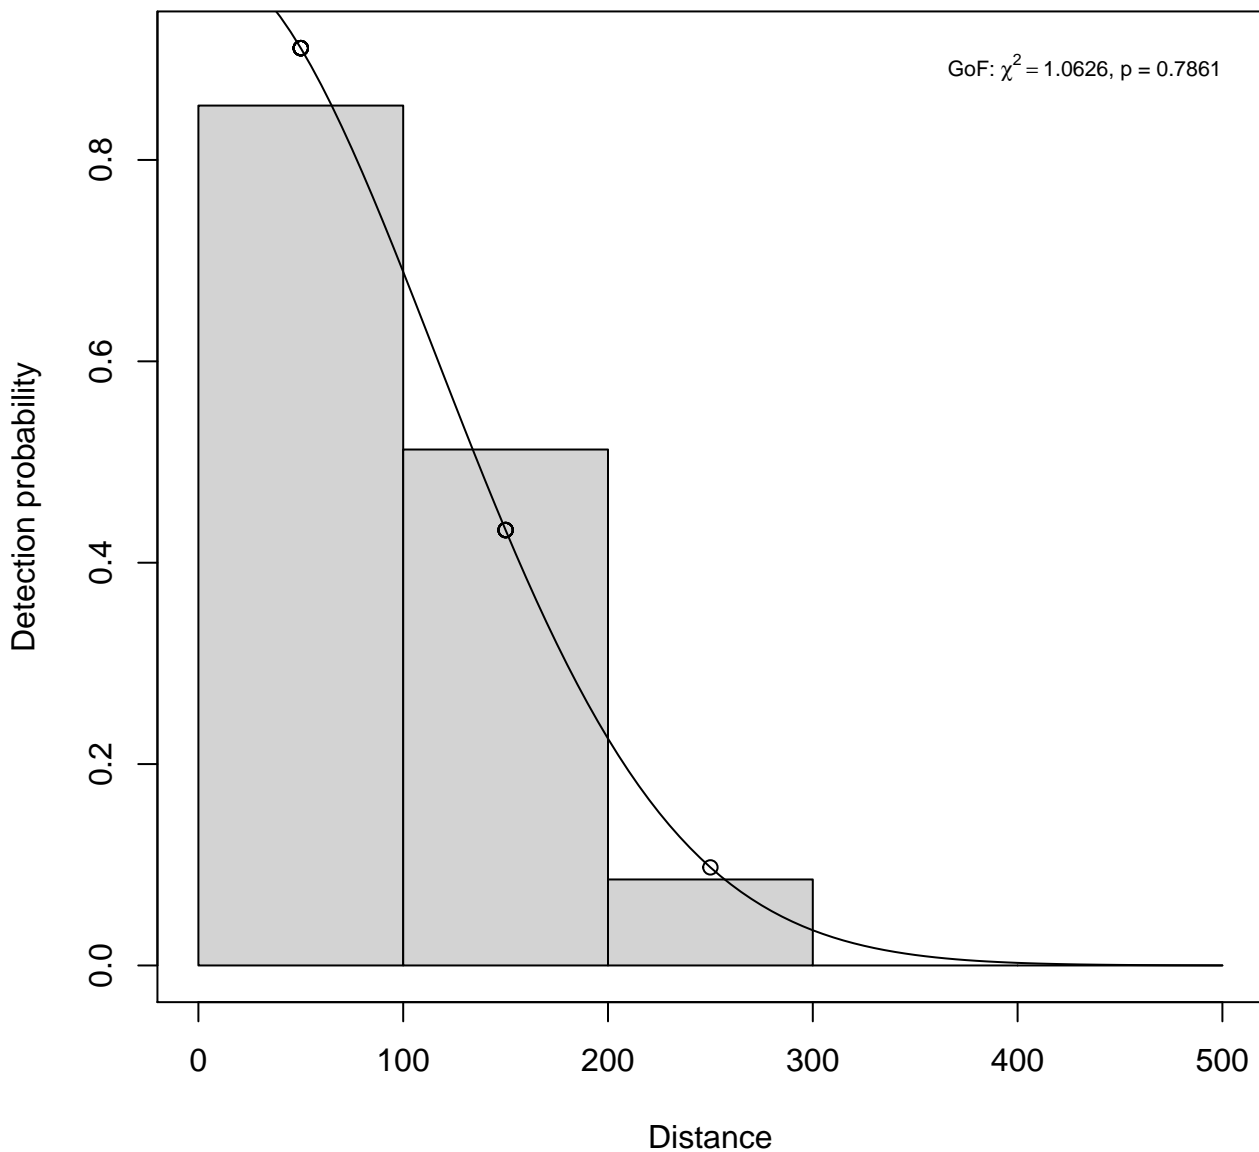

Supplement: s1 [file s1]
