# Supplementary material
Source: MDPI journal article supplement (https://www.mdpi.com/1424-2818/13/7/300)

# **Amazona autumnalis – Isthmian–Atlantic moist forests – Costa Rica**

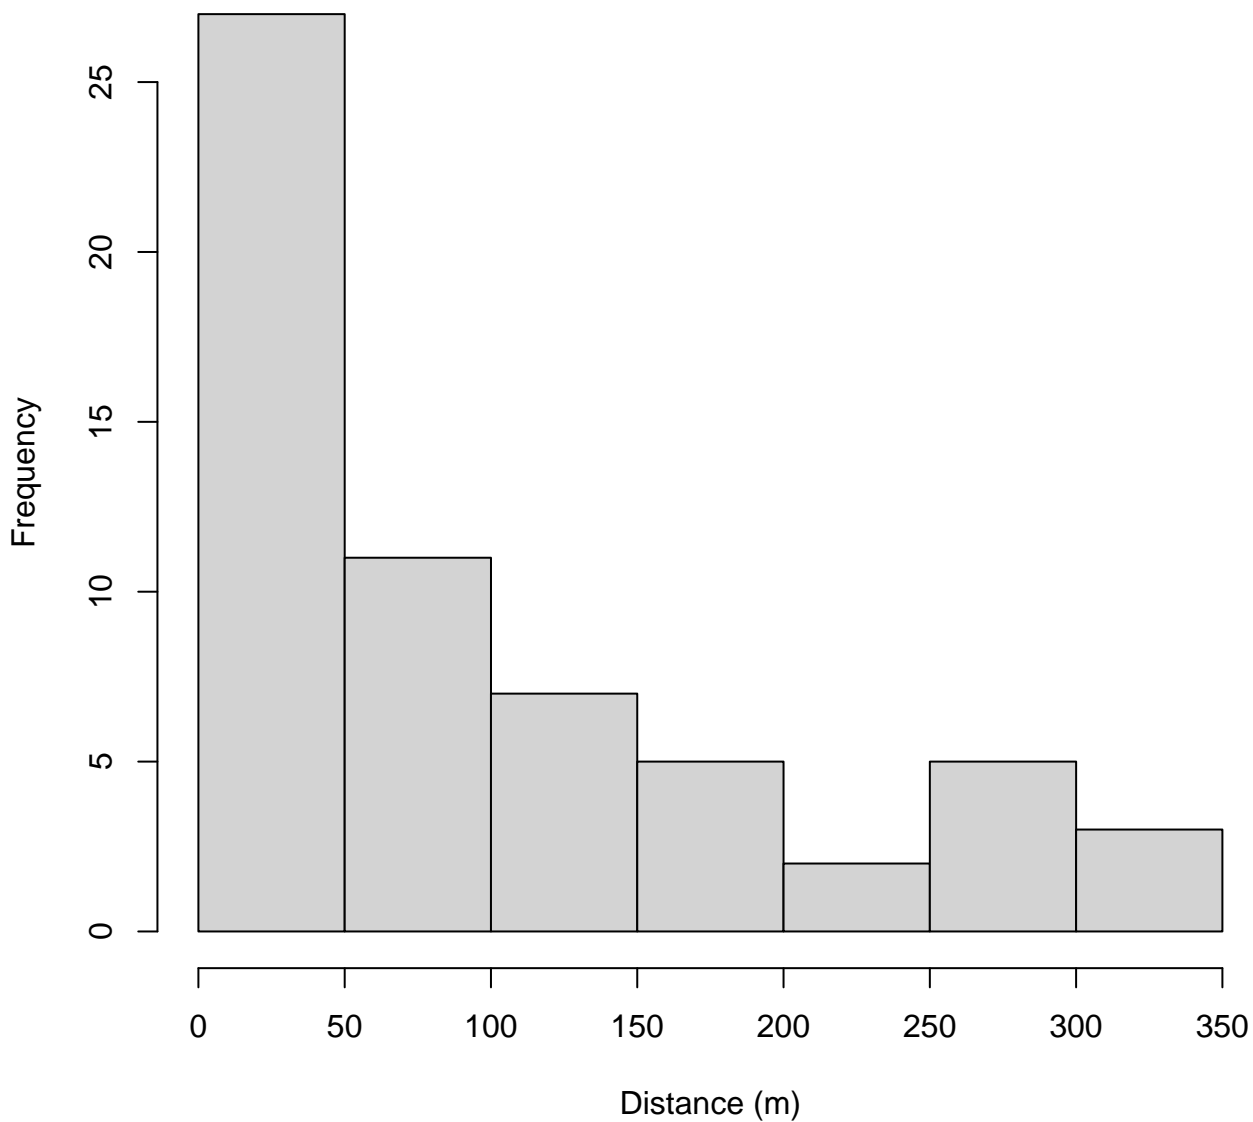

# Amazona autumnalis – Isthmian–Atlantic moist forests – Costa Rica

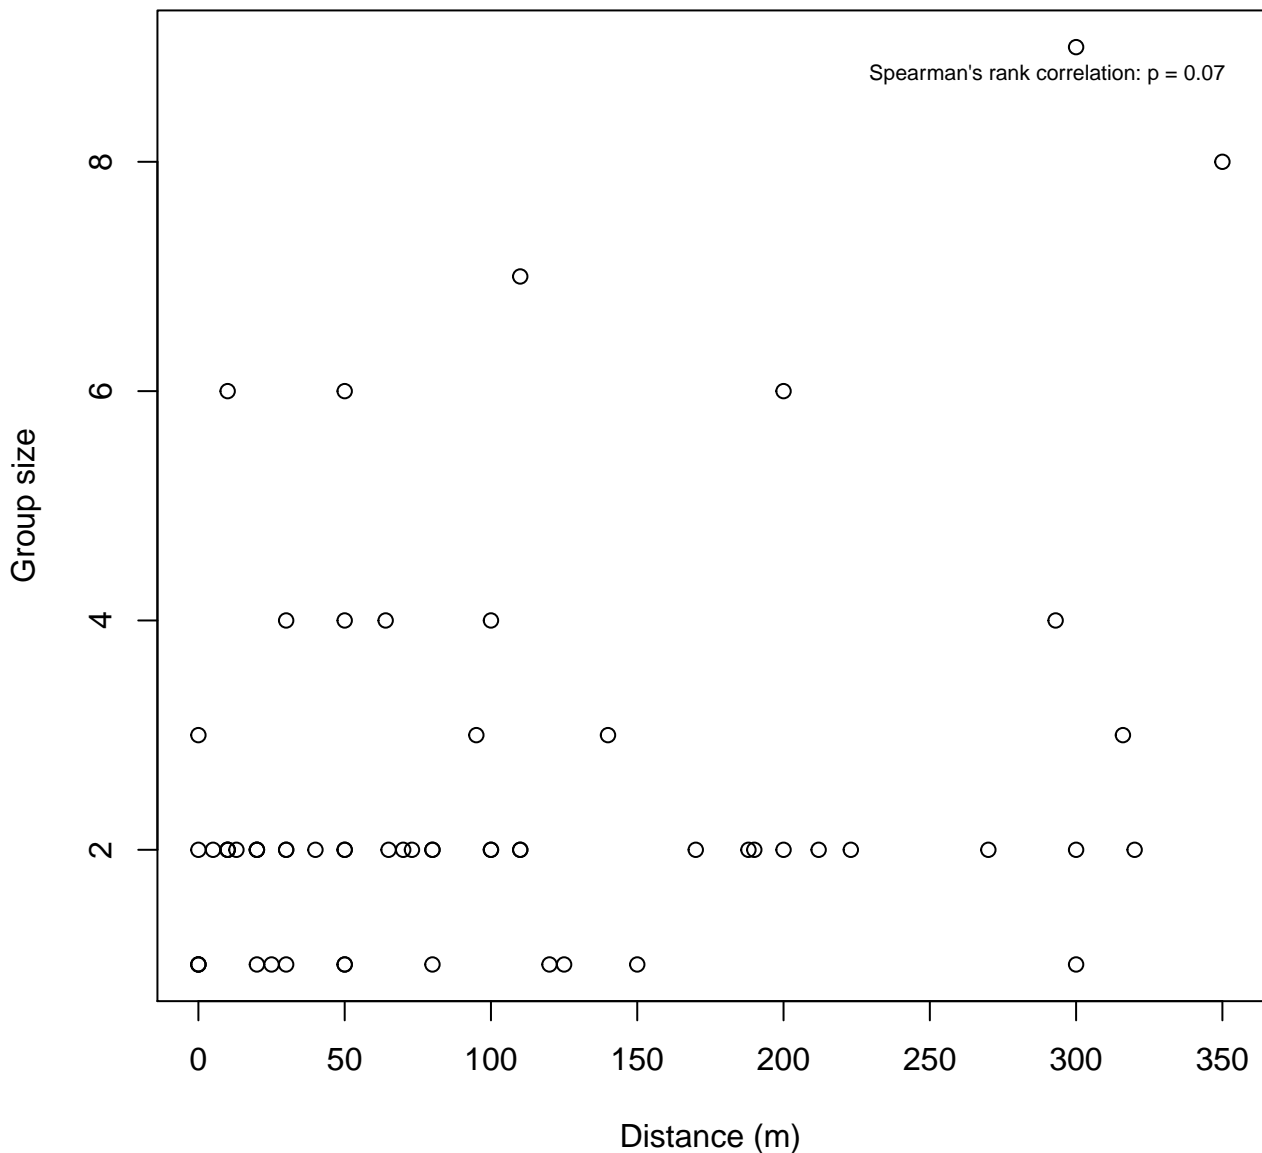

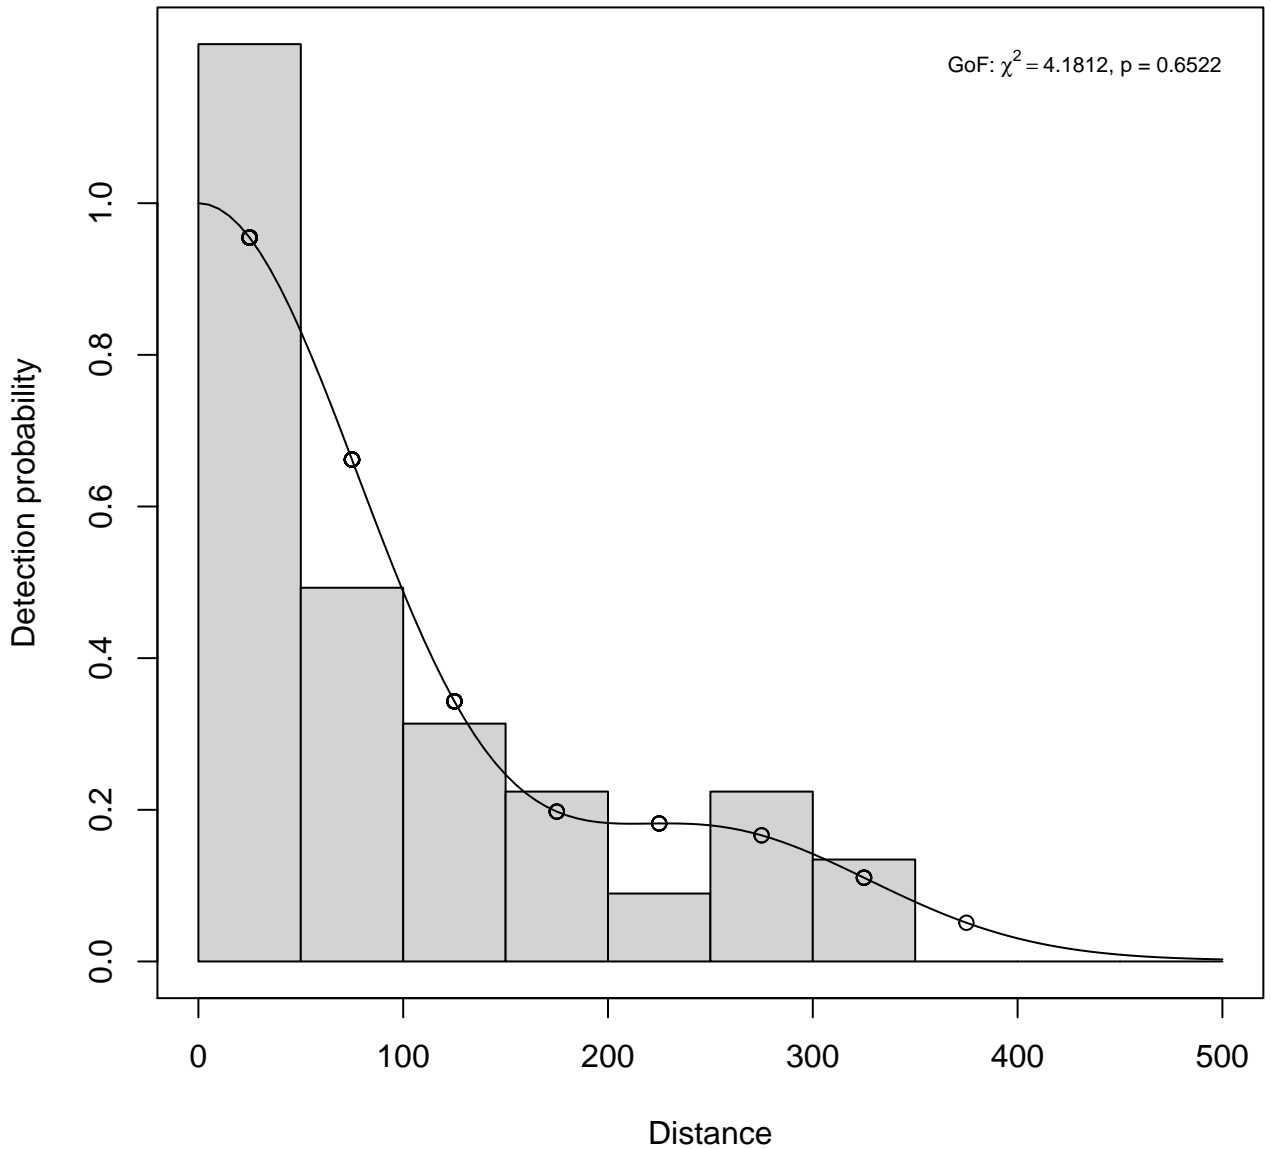

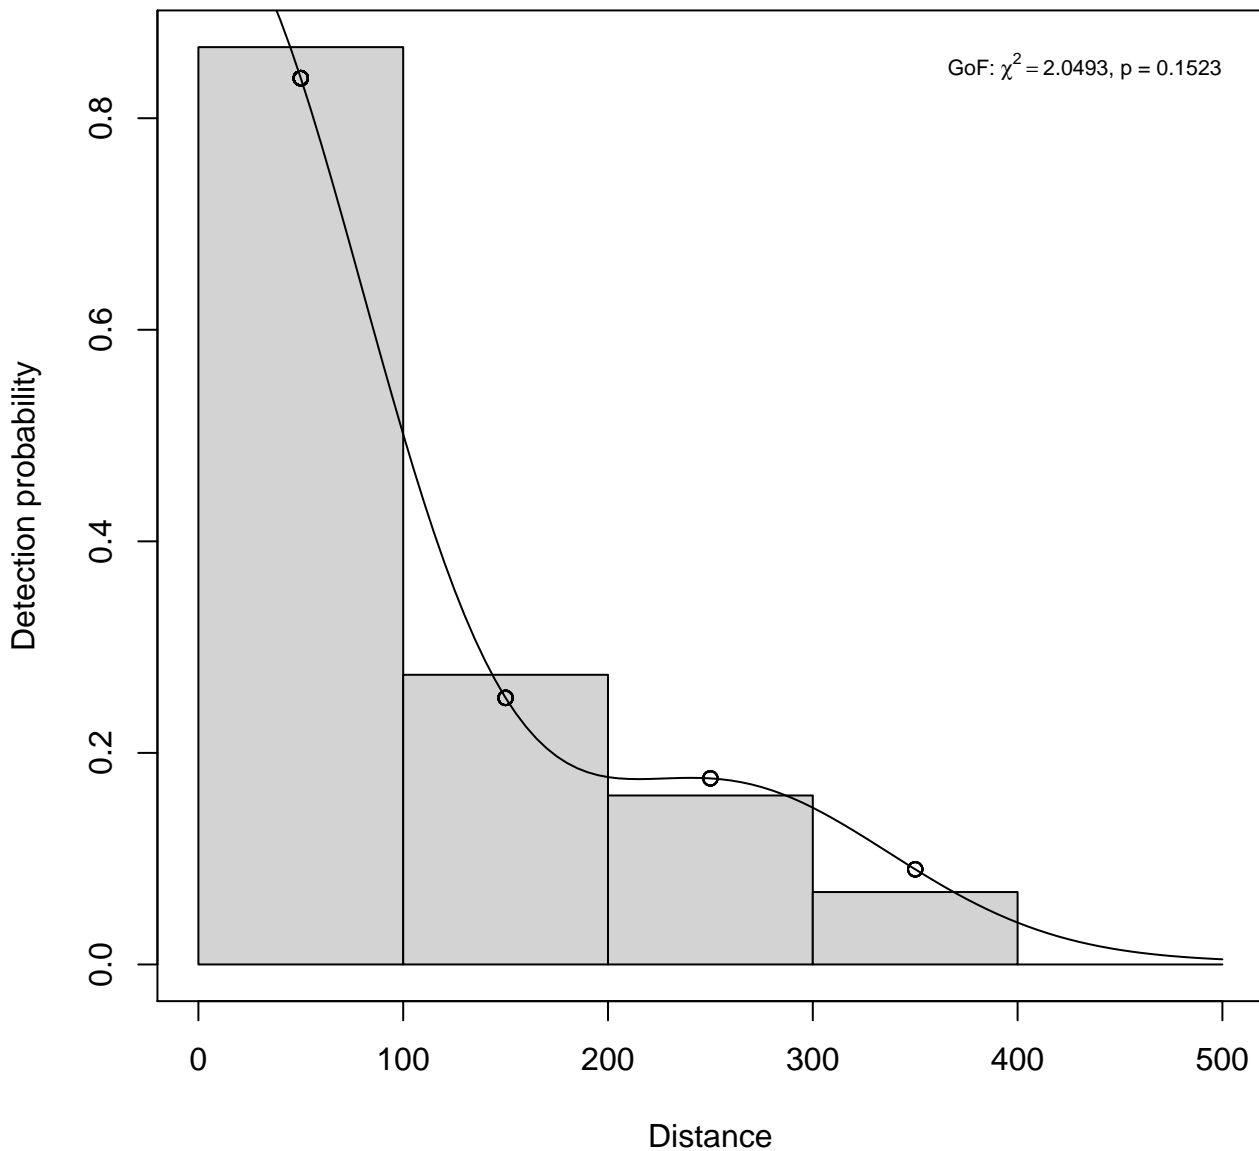

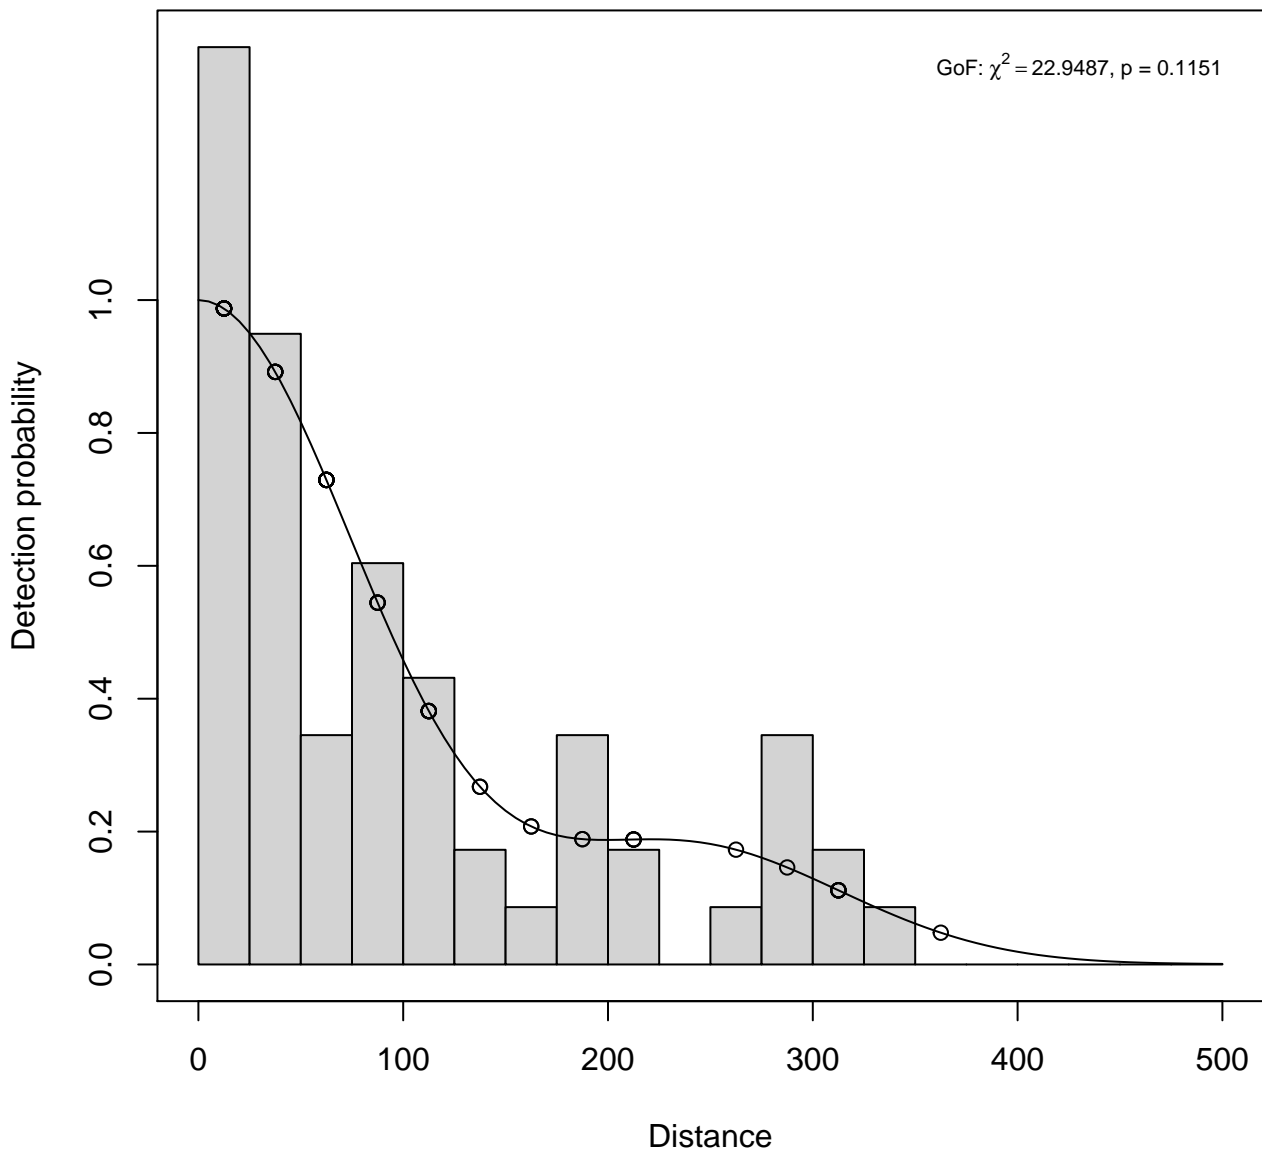

Supplement: s1 [file s1]
