# Supplementary material
Source: MDPI journal article supplement (https://www.mdpi.com/1424-2818/13/7/300)

# ***Psittacula chloropterus* – Hispaniolan dry forests – Dominican Republic**

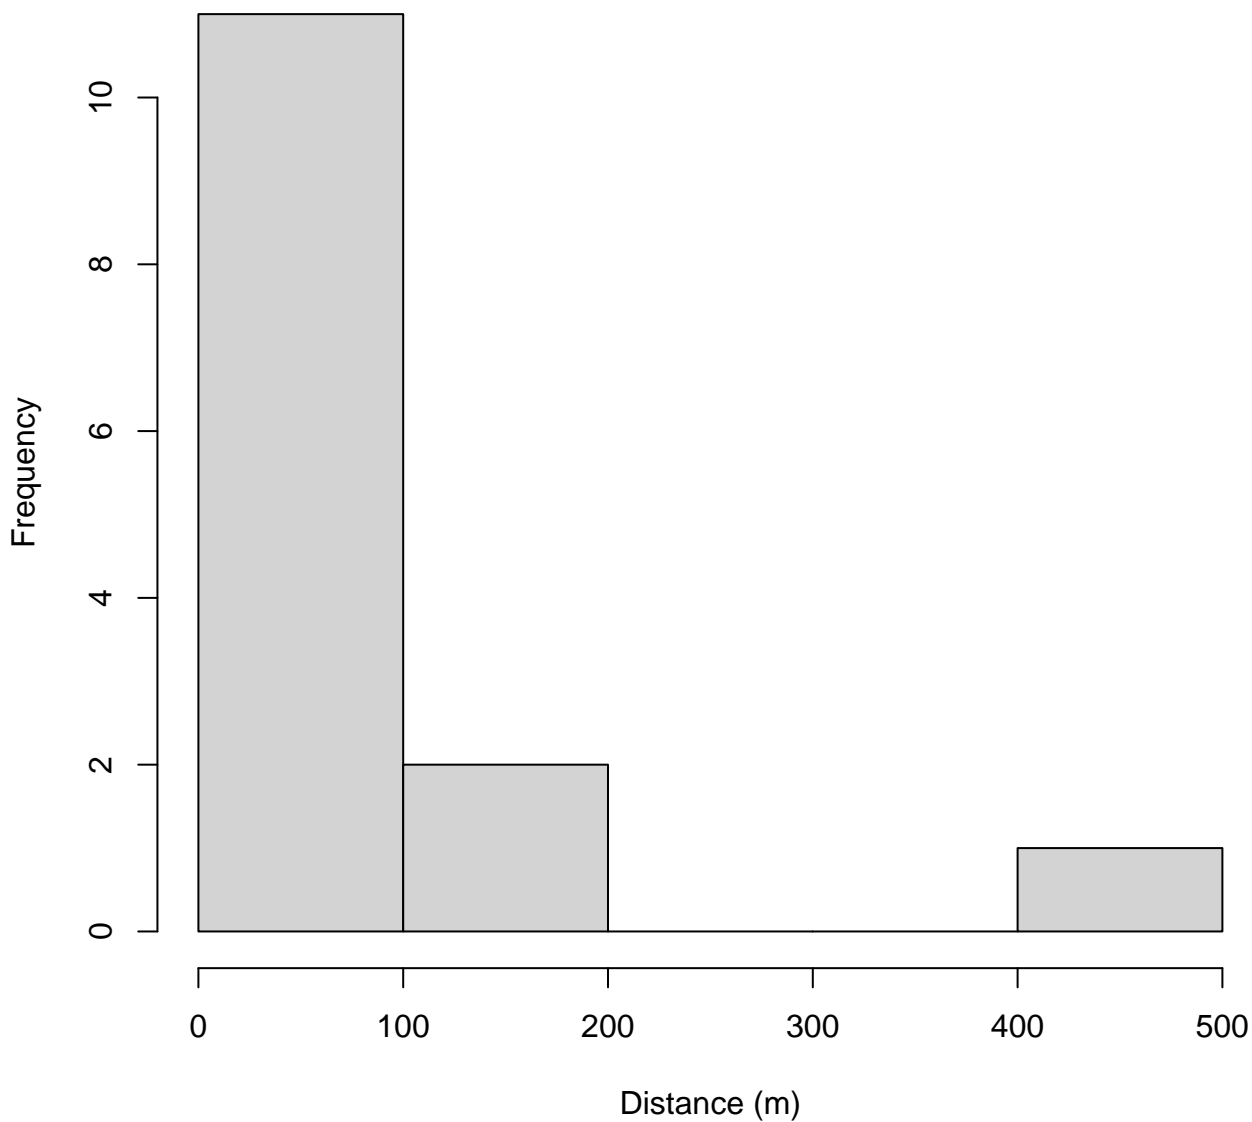

# ***Psittacula chloropterus* – Hispaniolan dry forests – Dominican Republic**

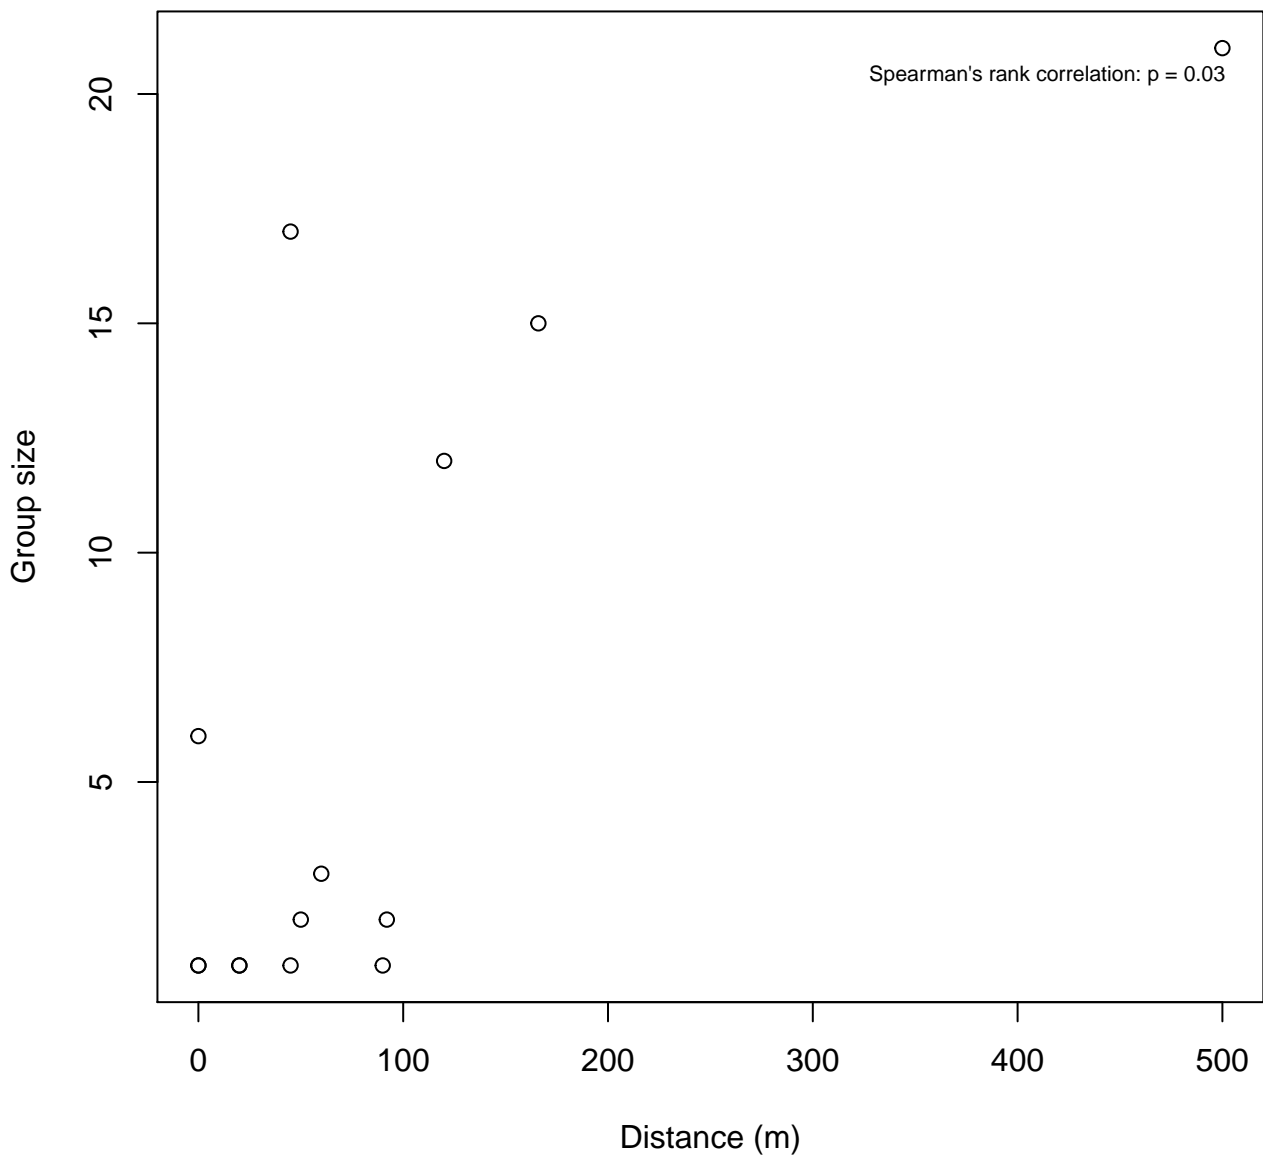

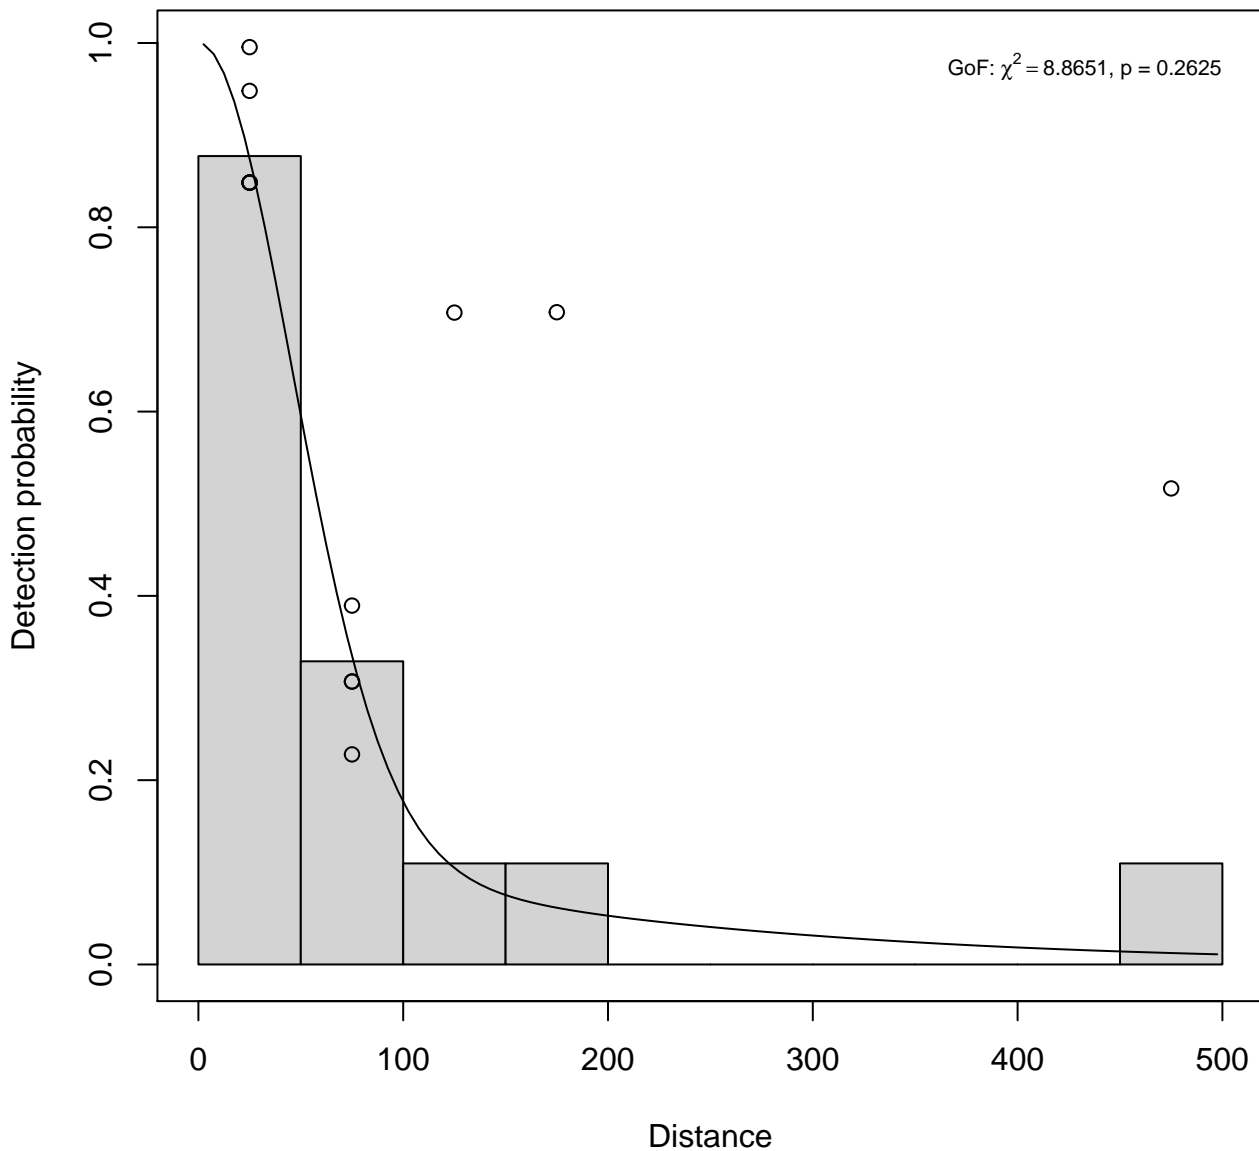

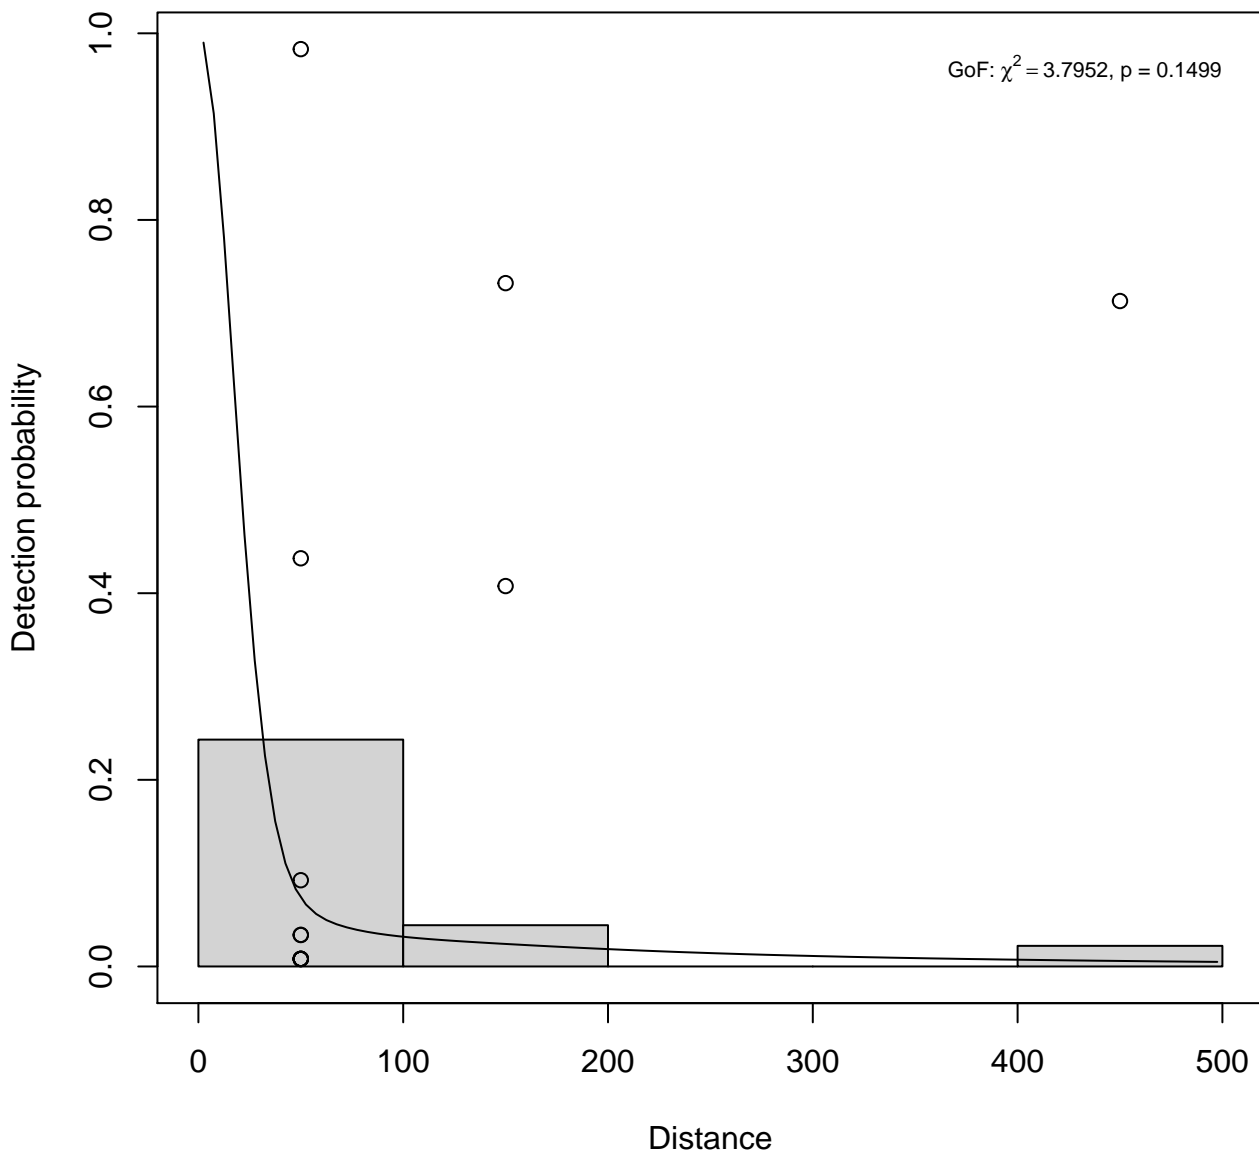

Psittacula chloropterus – Hispaniolan dry forests – Dominican Republic (N = 14, key function = hn)

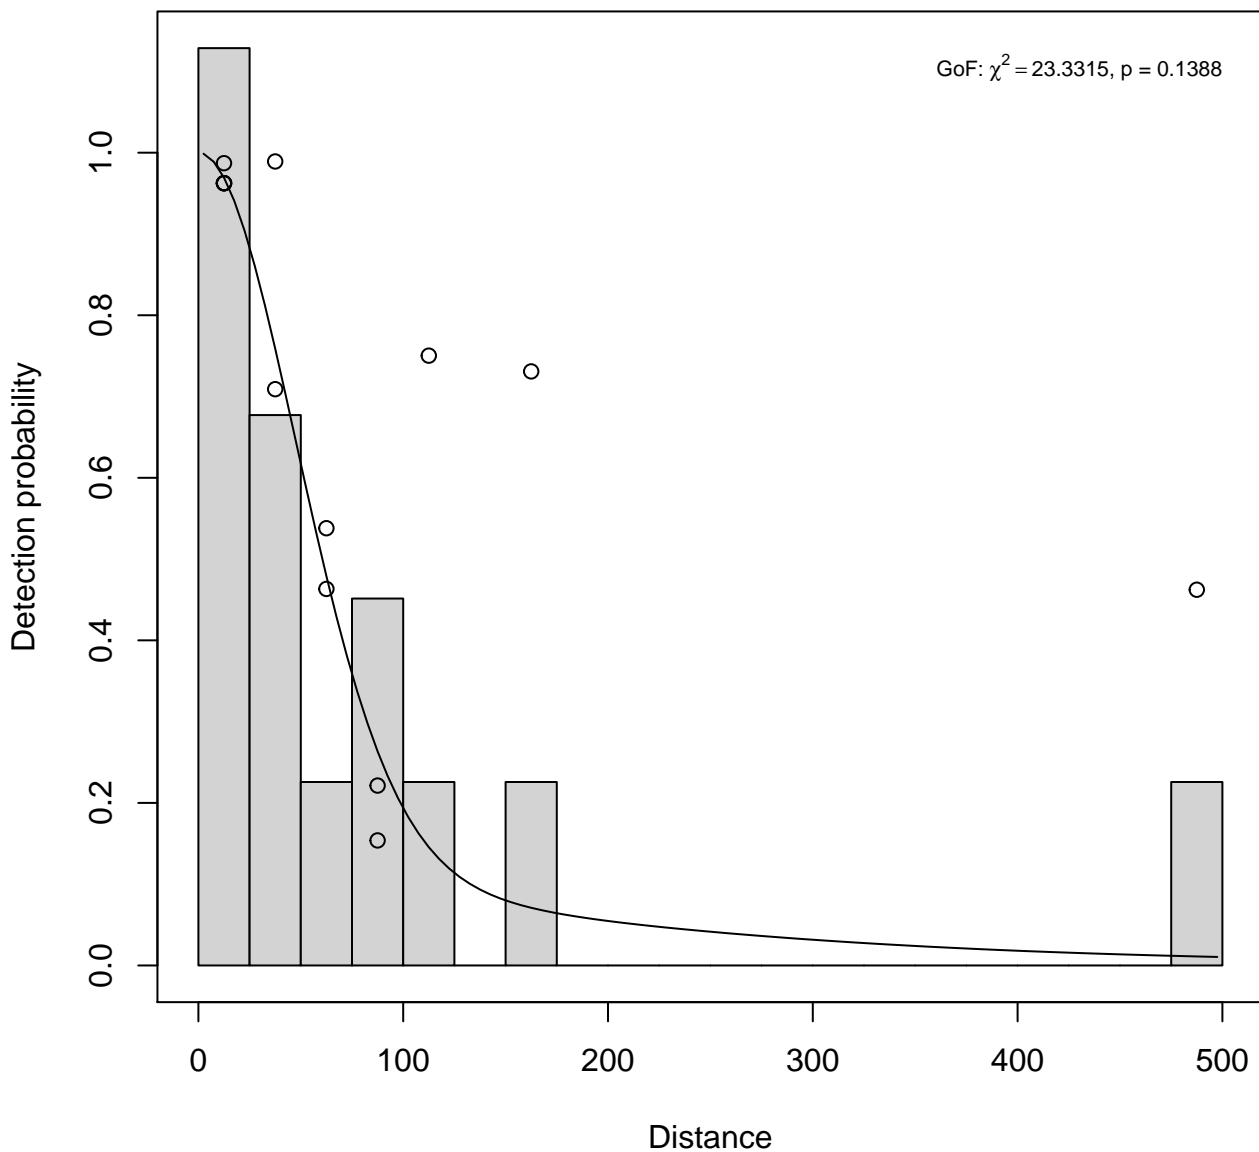

Supplement: s1 [file s1]
