# Supplementary material
Source: MDPI journal article supplement (https://www.mdpi.com/1424-2818/13/7/300)

# Amazona aestiva – Beni savanna – Bolivia

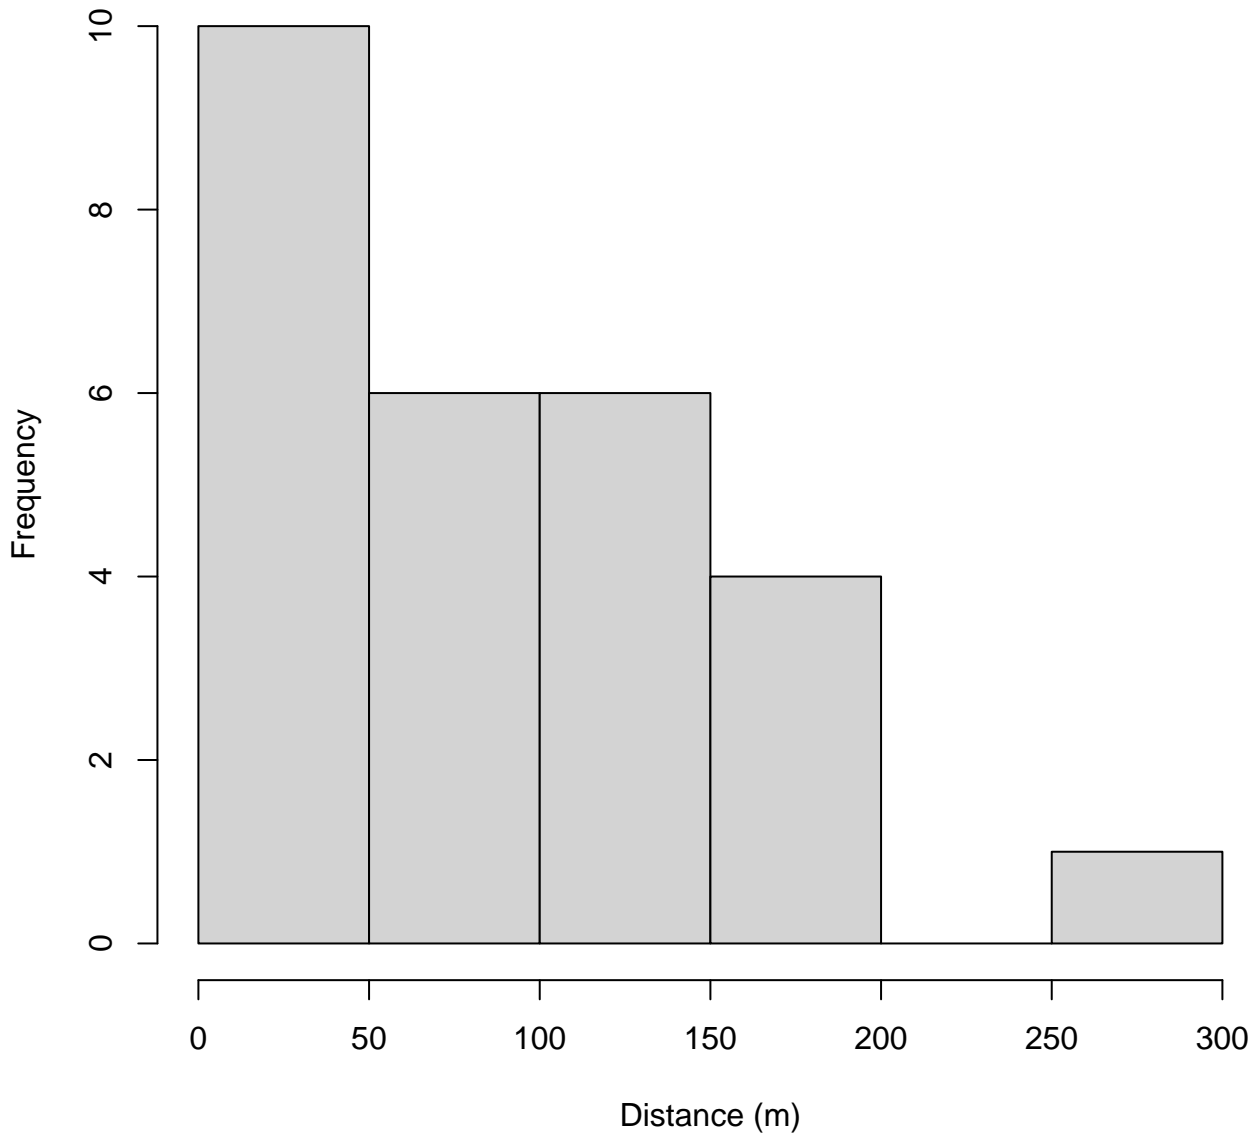

# Amazona aestiva – Beni savanna – Bolivia

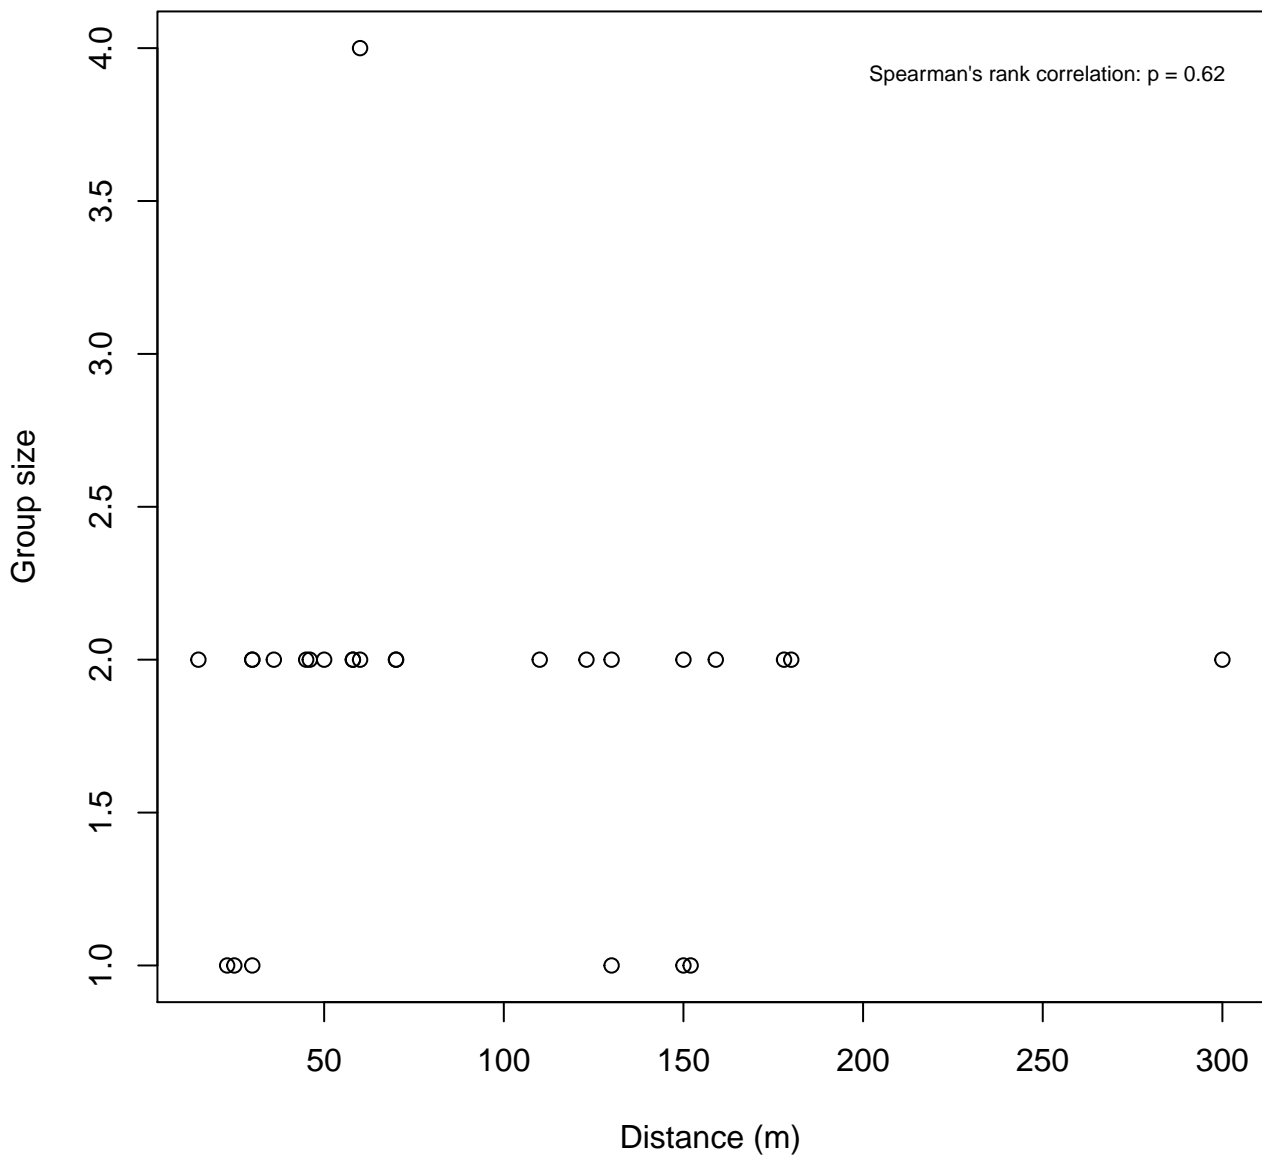

Amazona aestiva – Beni savanna – Bolivia (N = 27, key function = hn)

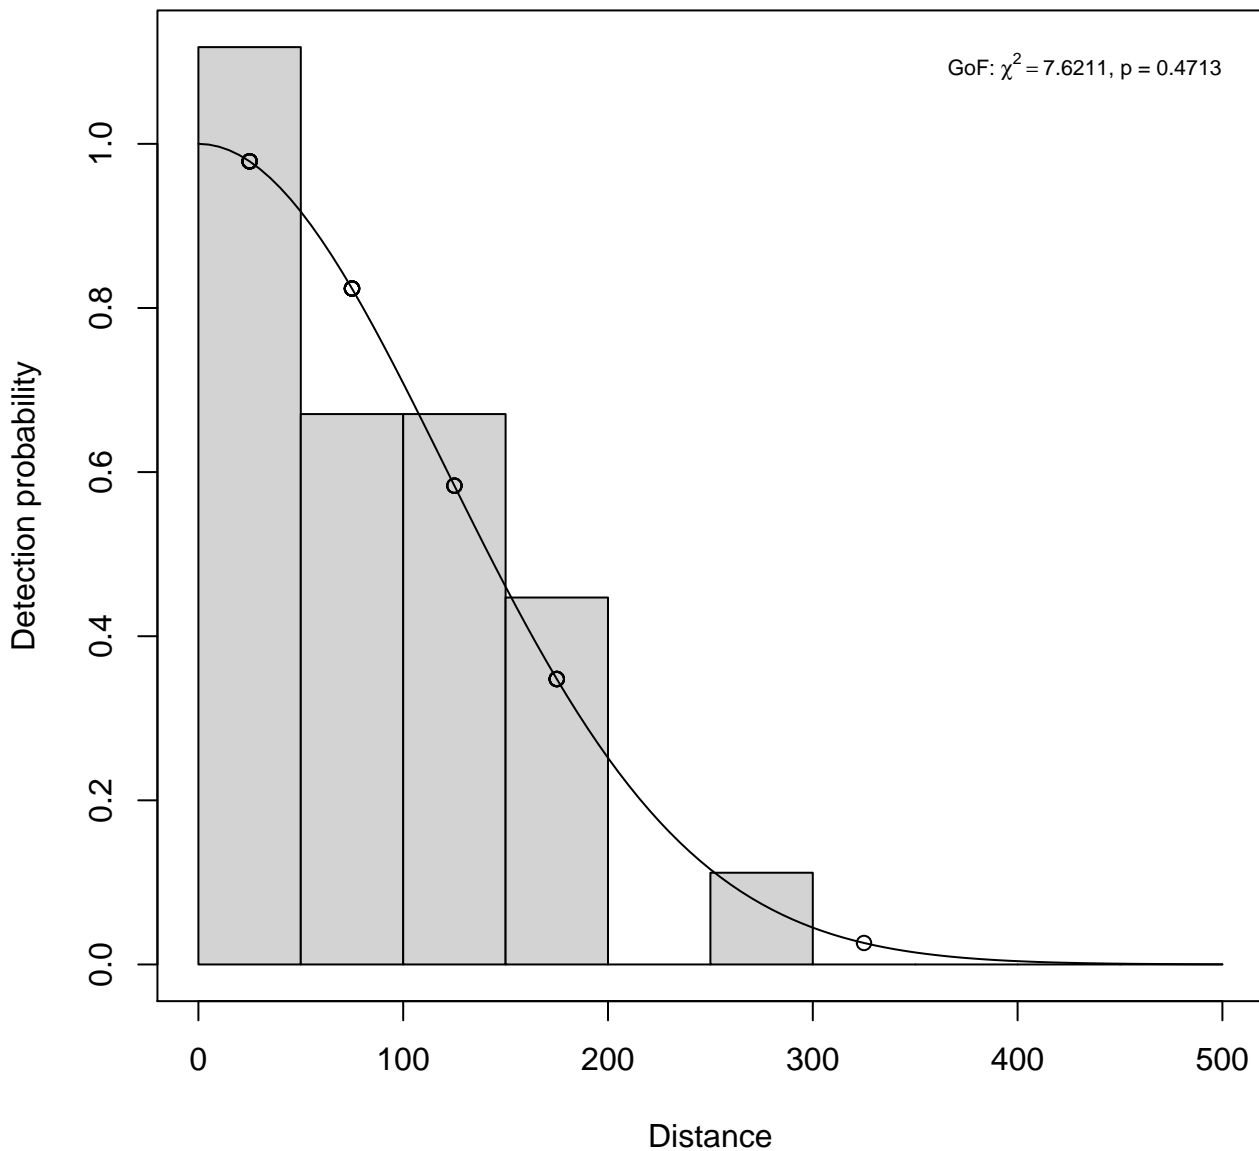

Amazona aestiva – Beni savanna – Bolivia (N = 27, key function = hn)

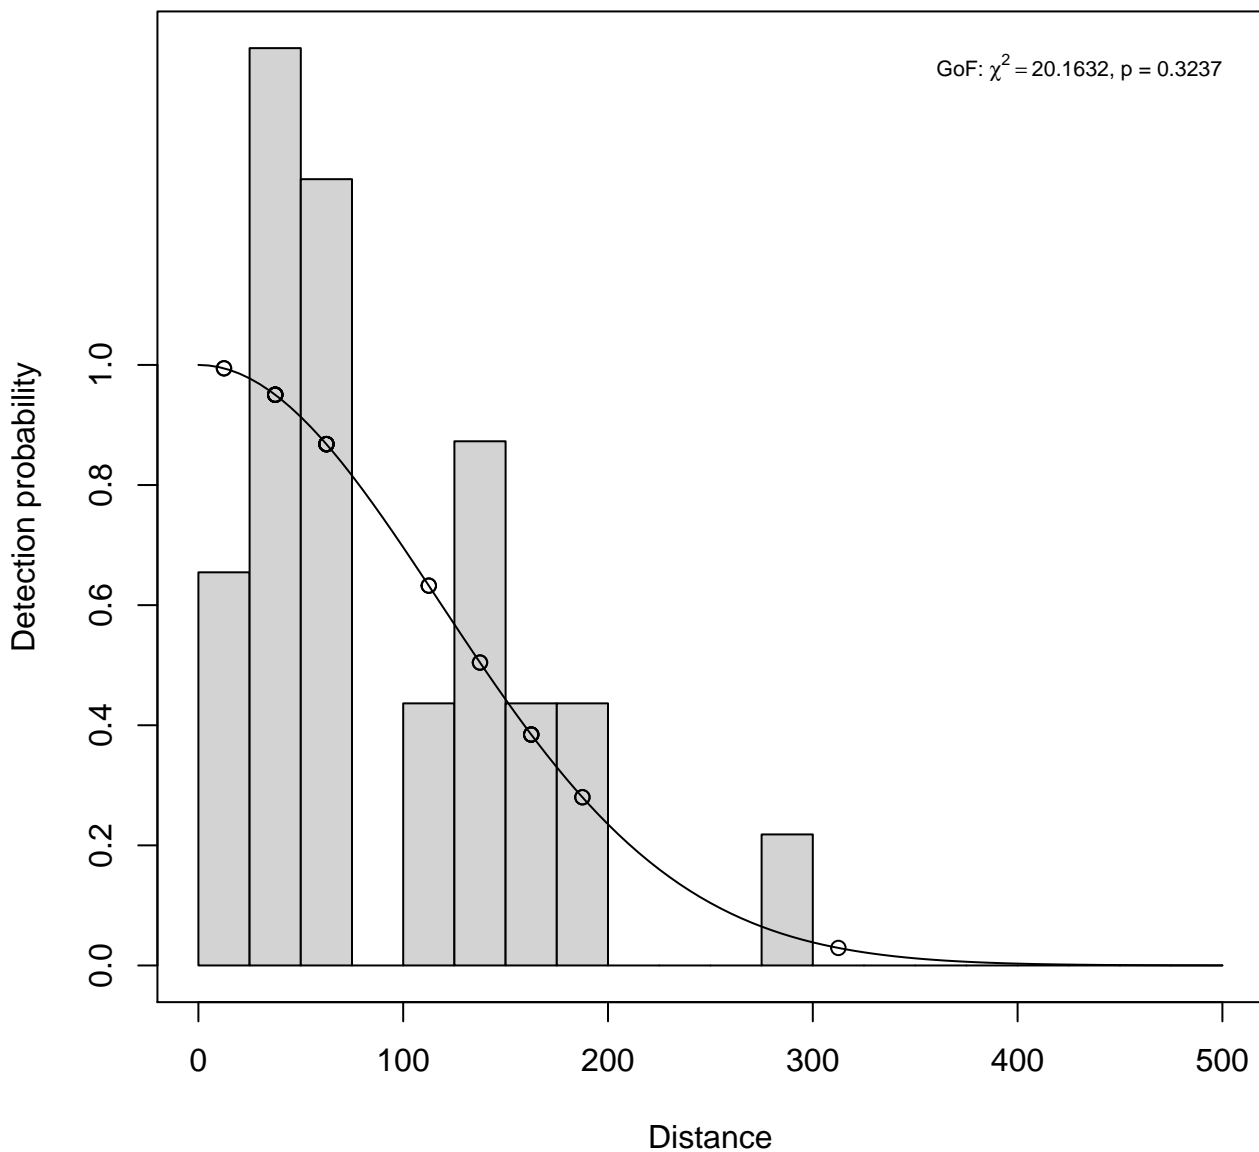

Amazona aestiva – Beni savanna – Bolivia (N = 27, key function = hn)

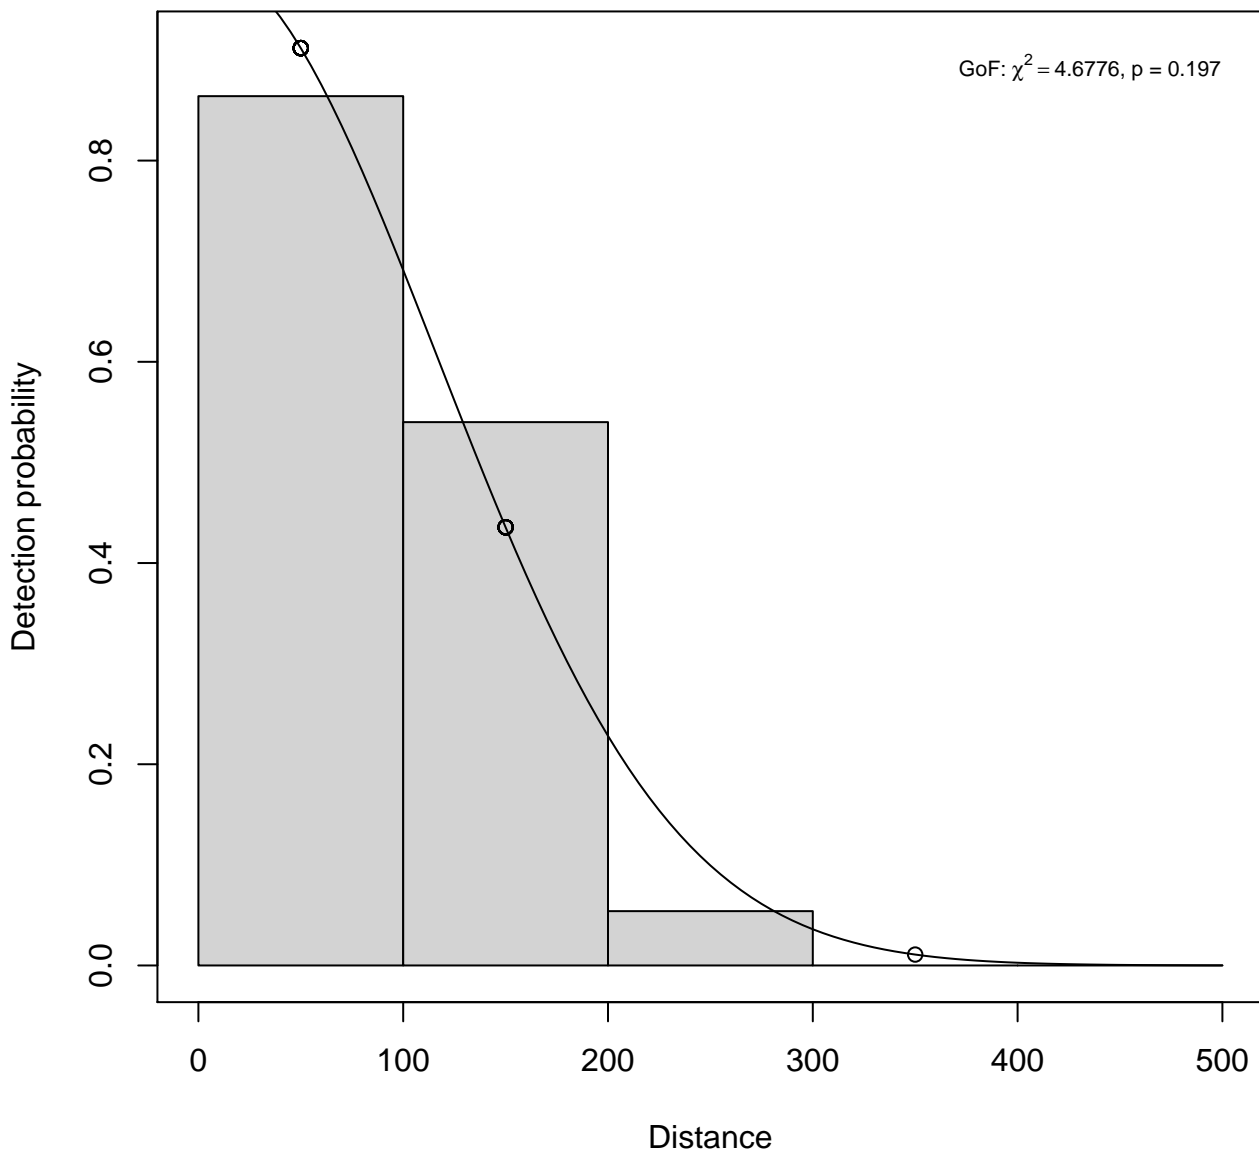

Supplement: s1 [file s1]
