# Supplementary material
Source: MDPI journal article supplement (https://www.mdpi.com/1424-2818/13/7/300)

**Eolophus roseicapilla – Eastern Australian temperate forests – Australia**

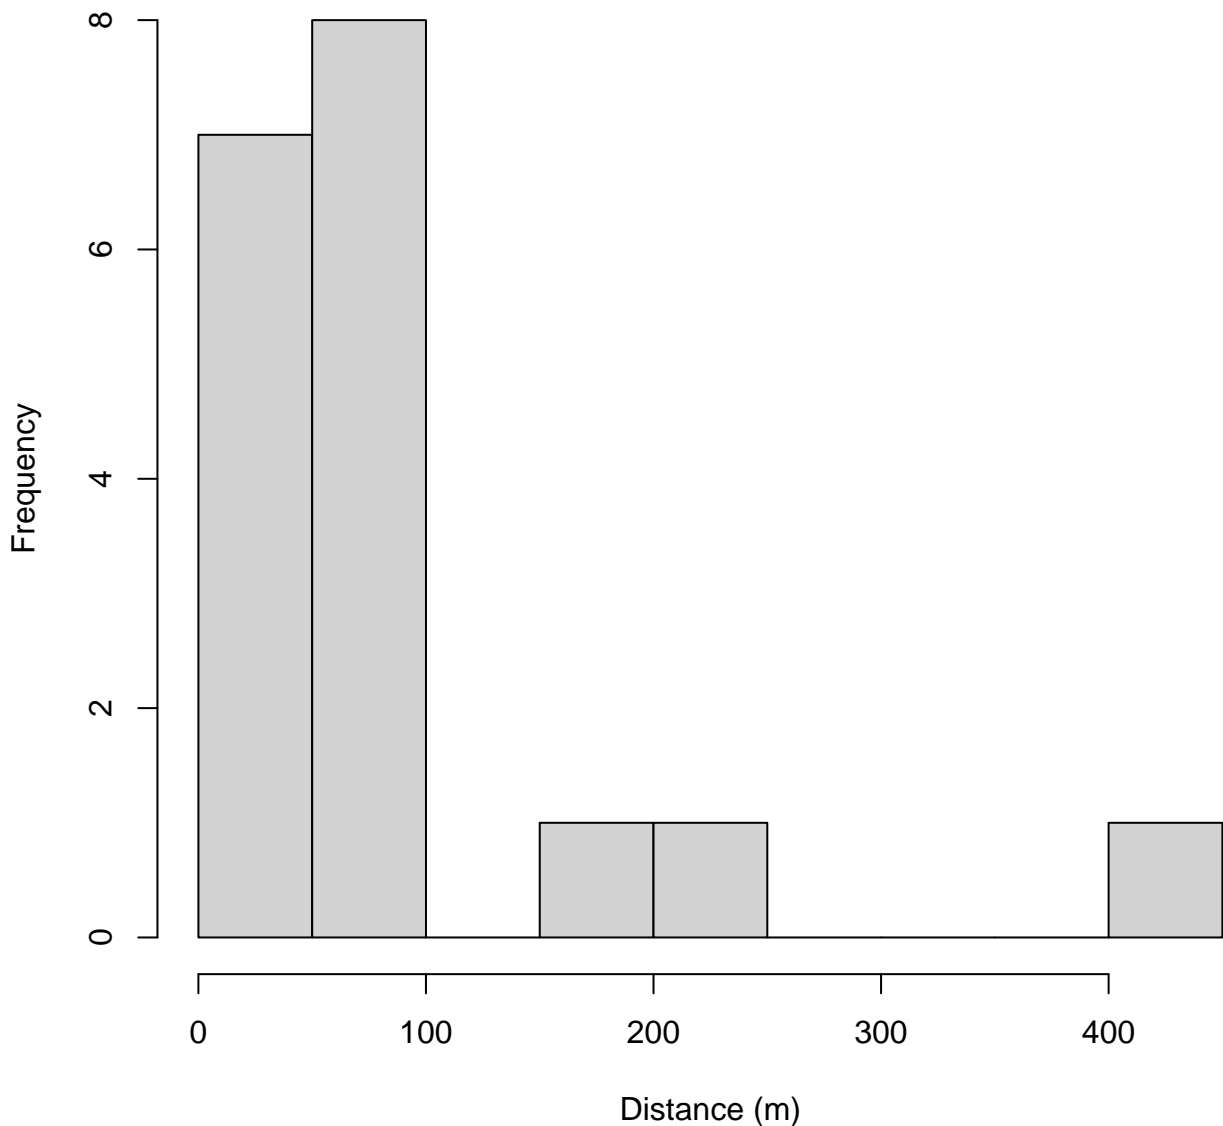

**Eolophus roseicapilla – Eastern Australian temperate forests – Australia**

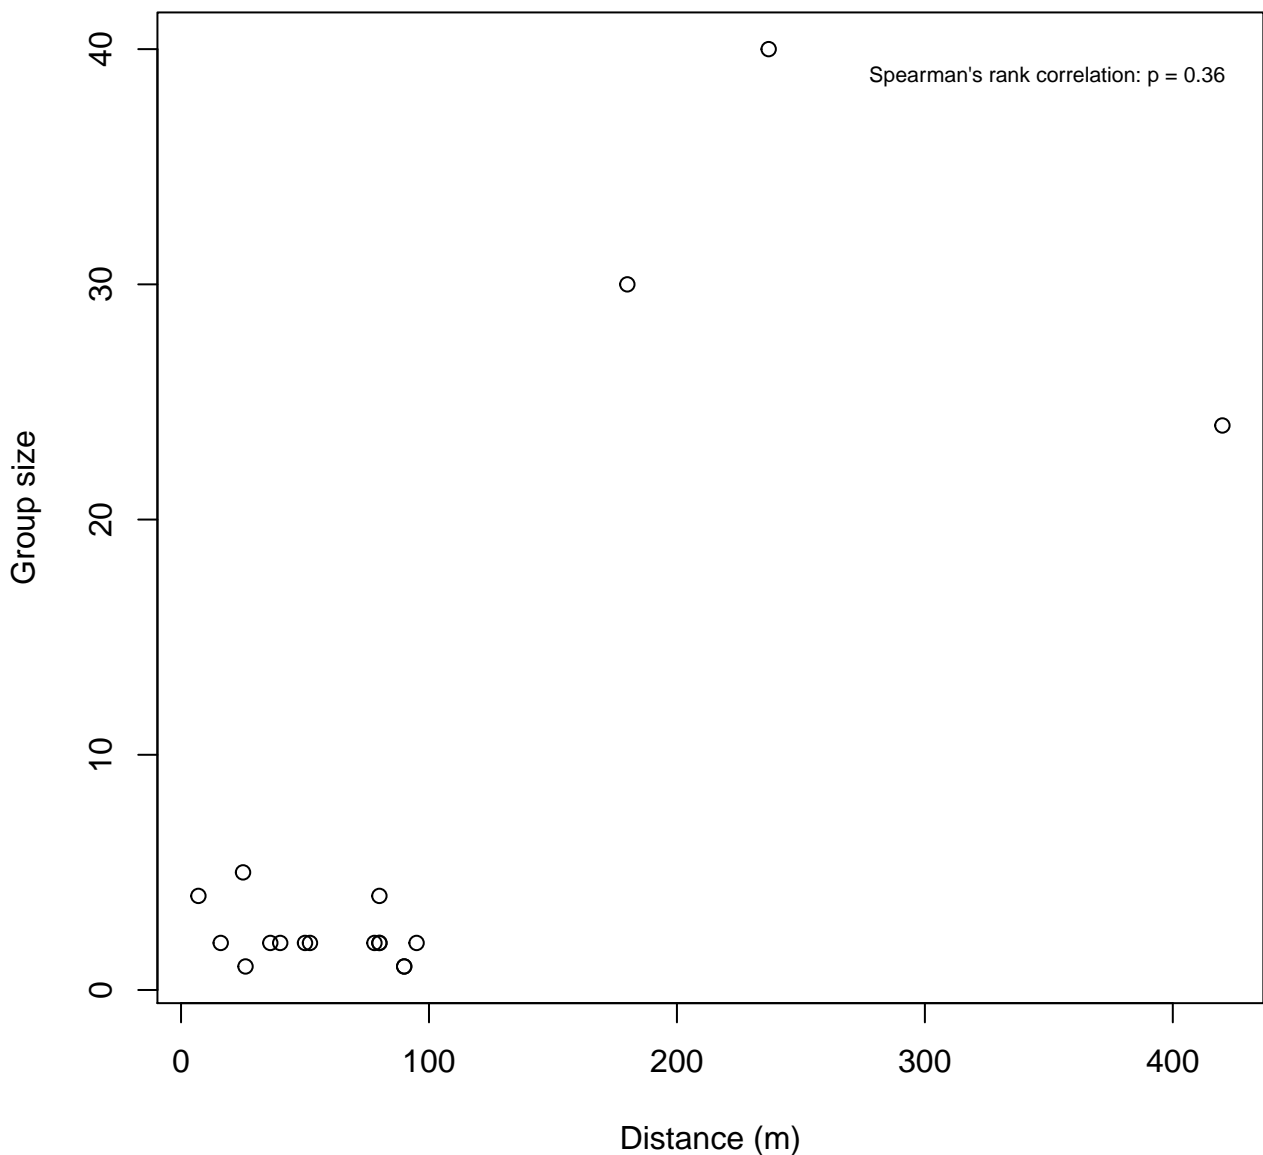

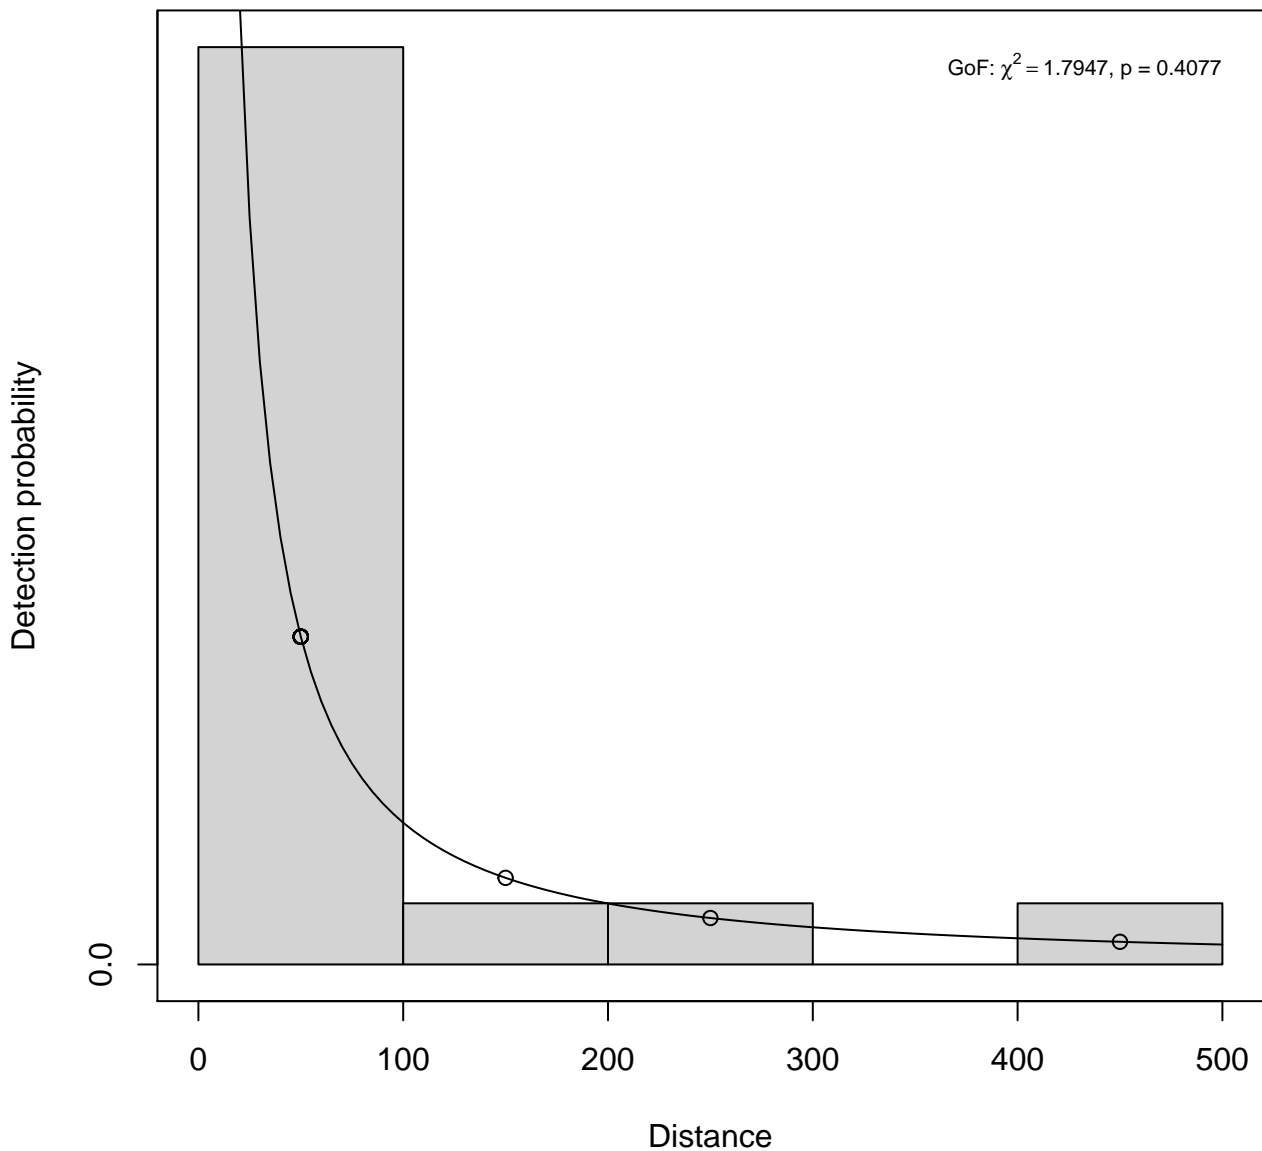

Eolophus roseicapilla – Eastern Australian temperate forests – Australia (N = 18, key function = hr)

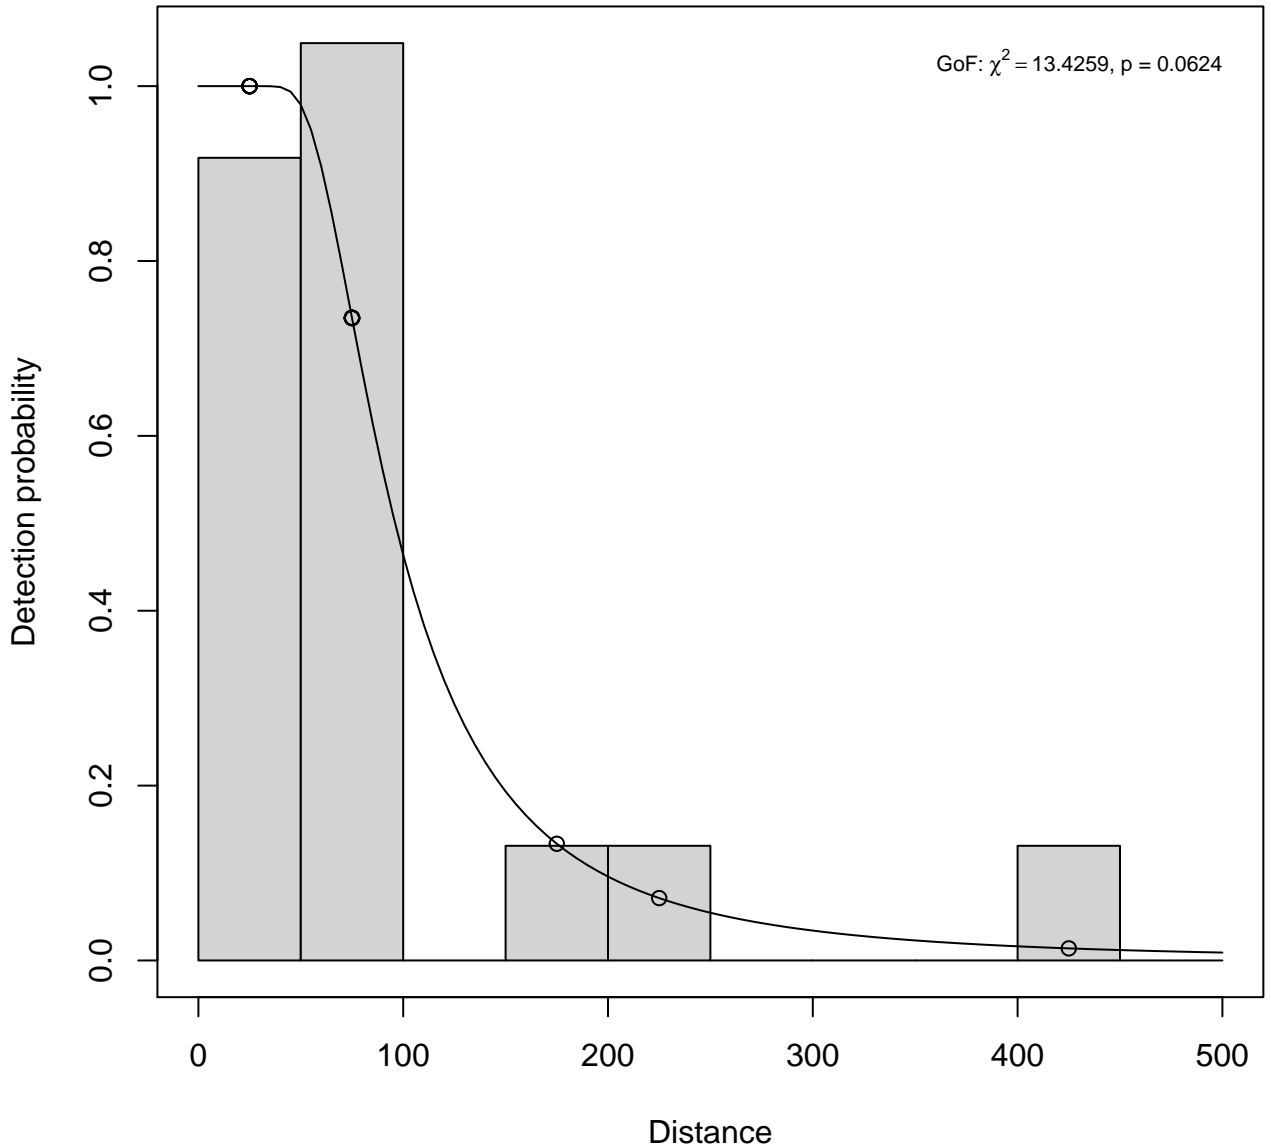

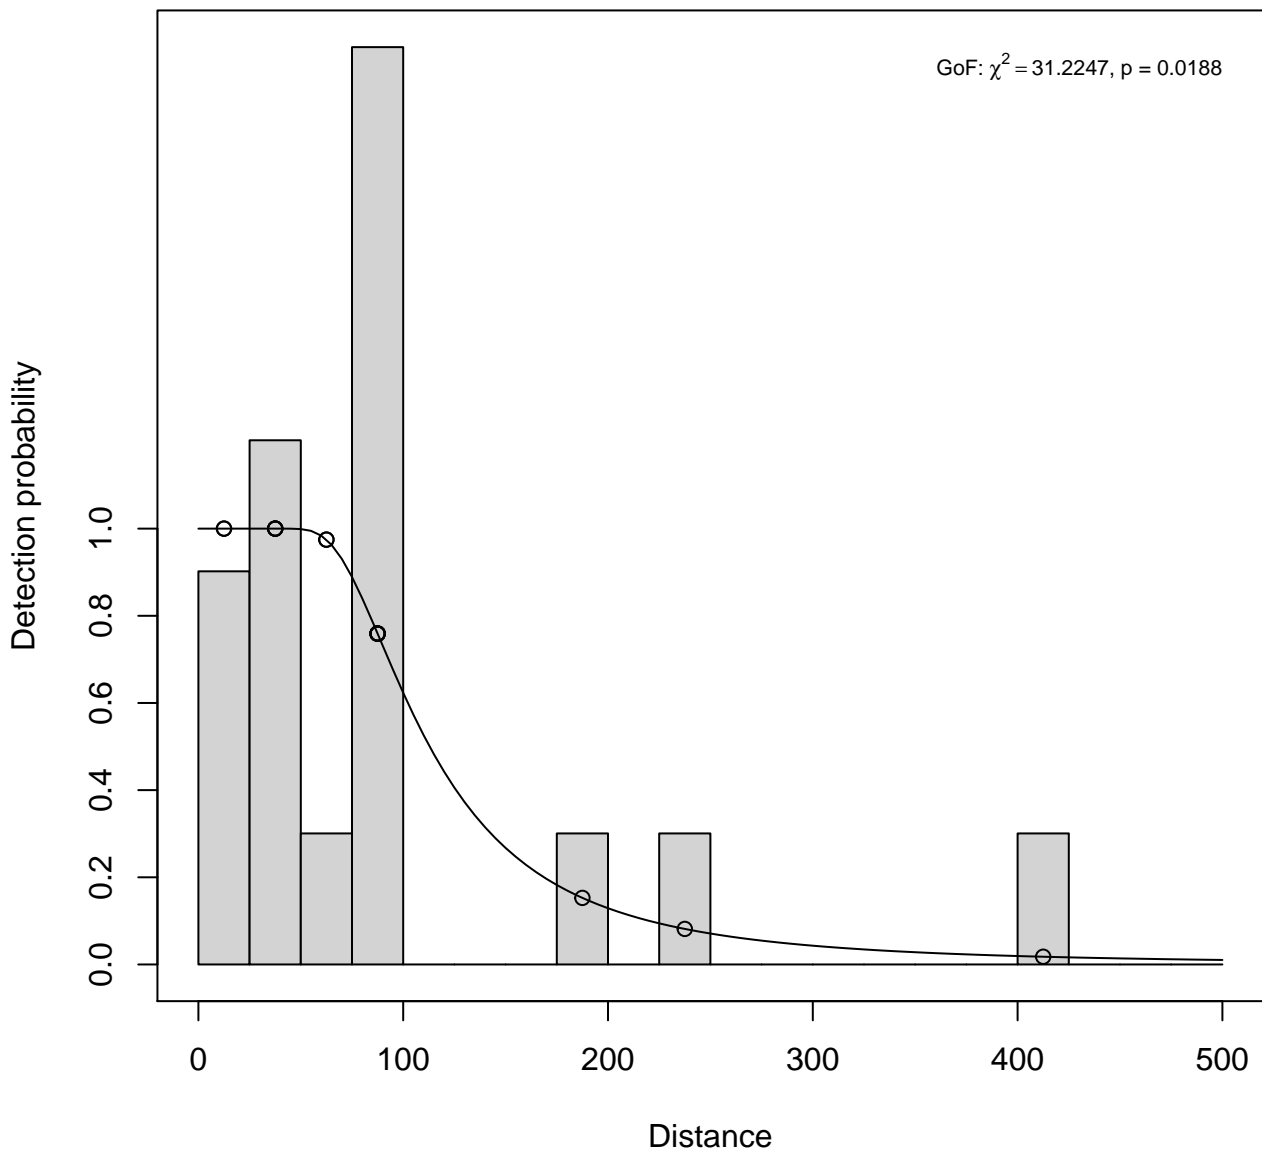

Supplement: s1 [file s1]
