# Supplementary material
Source: MDPI journal article supplement (https://www.mdpi.com/1424-2818/13/7/300)

**Psittacula cyanocephala – Himalayan subtropical pine forests – India**

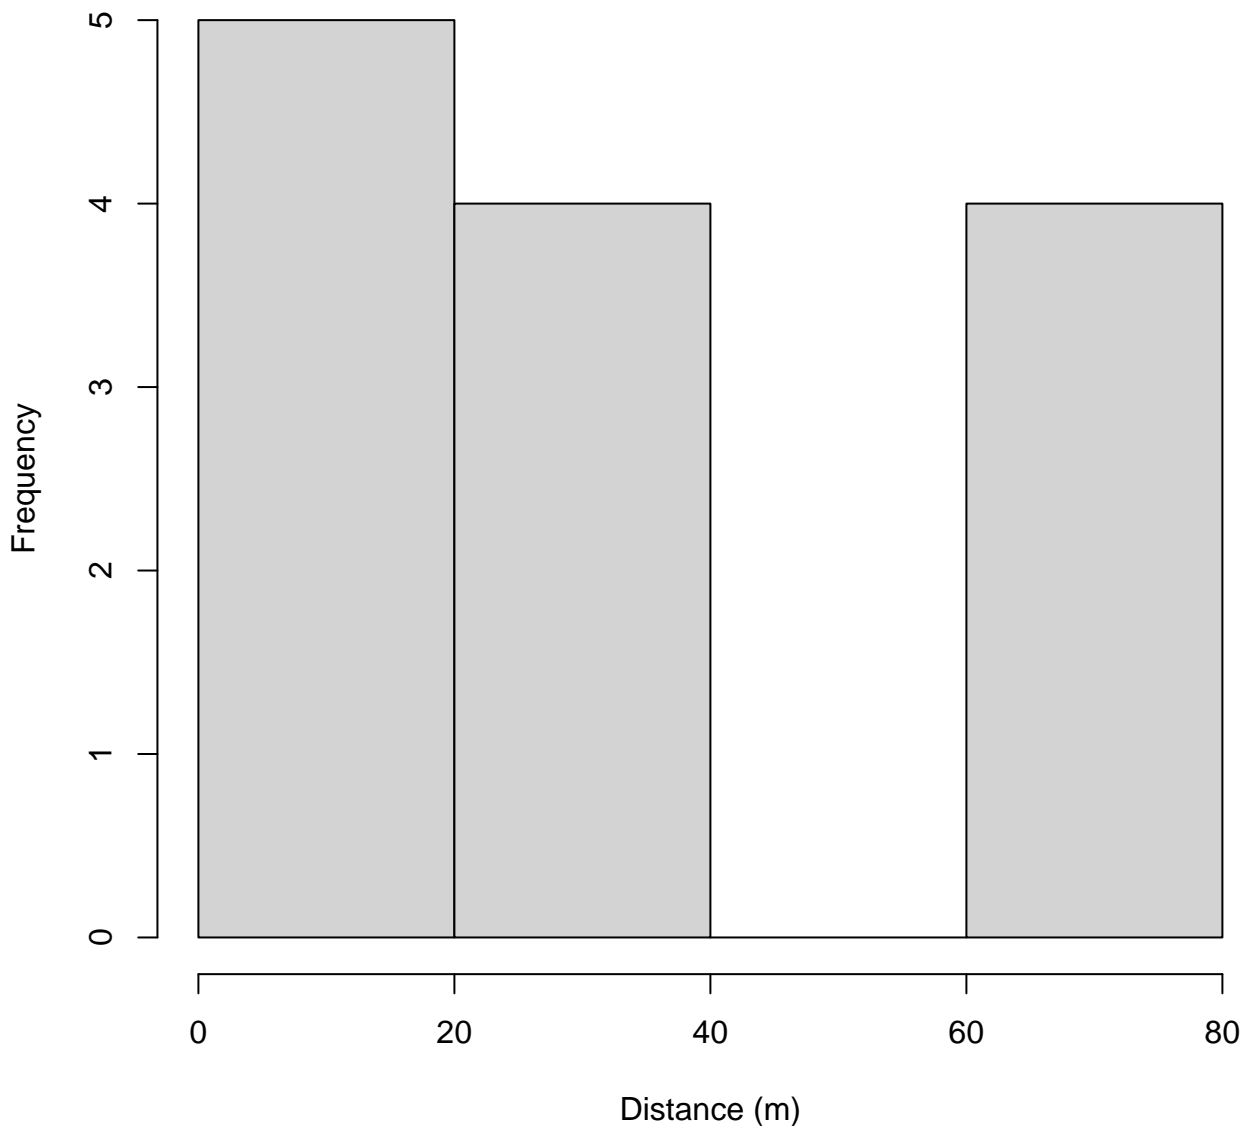

**Psittacula cyanocephala – Himalayan subtropical pine forests – India**

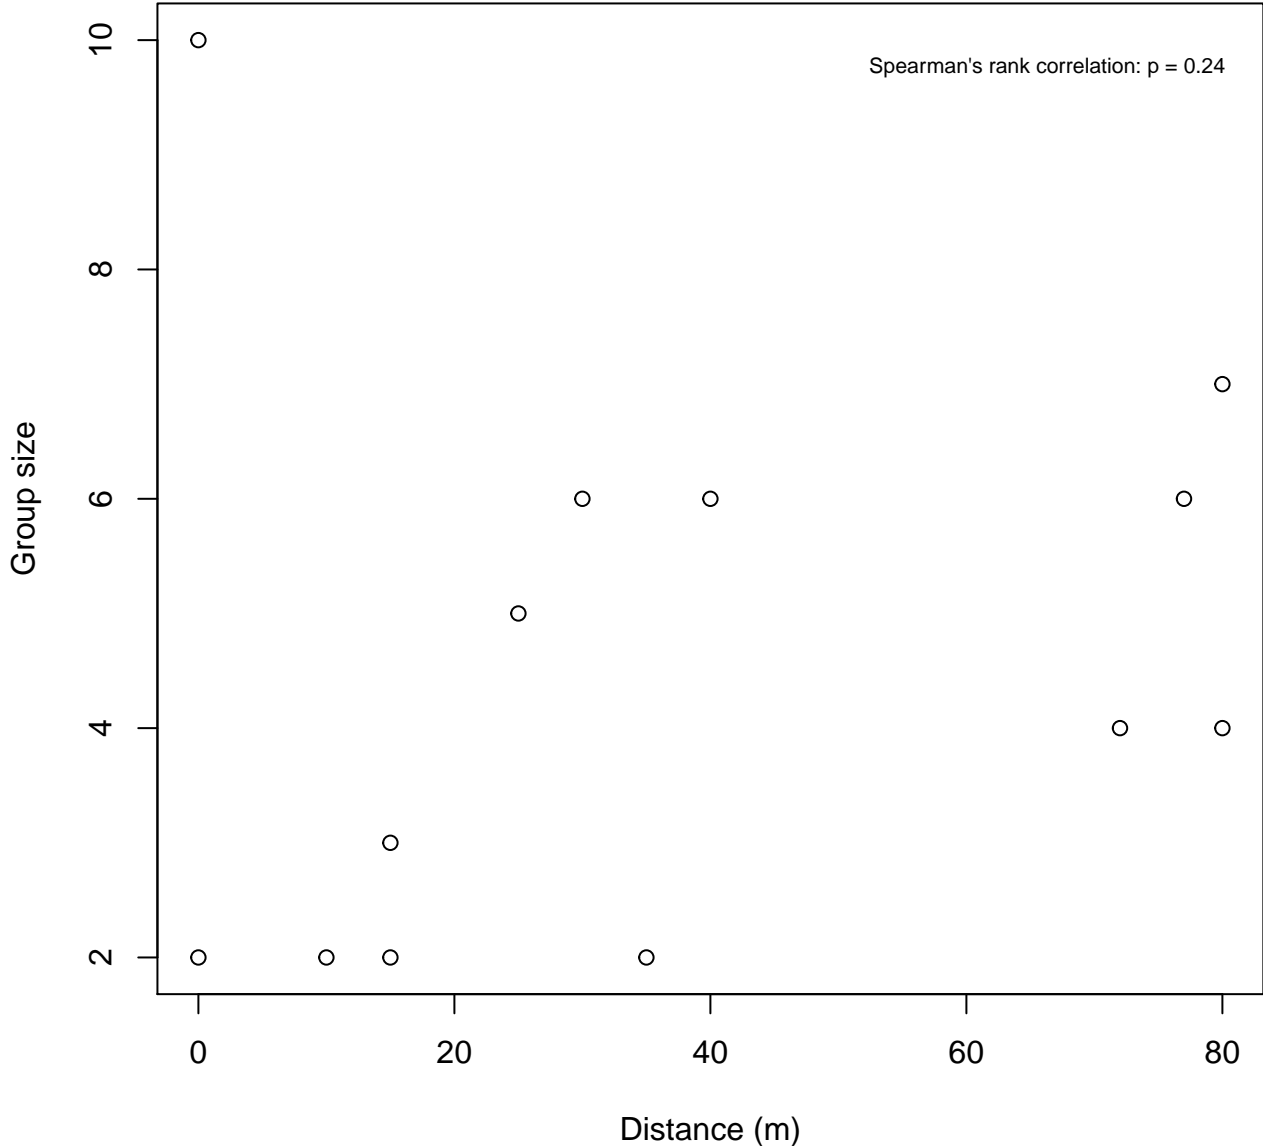

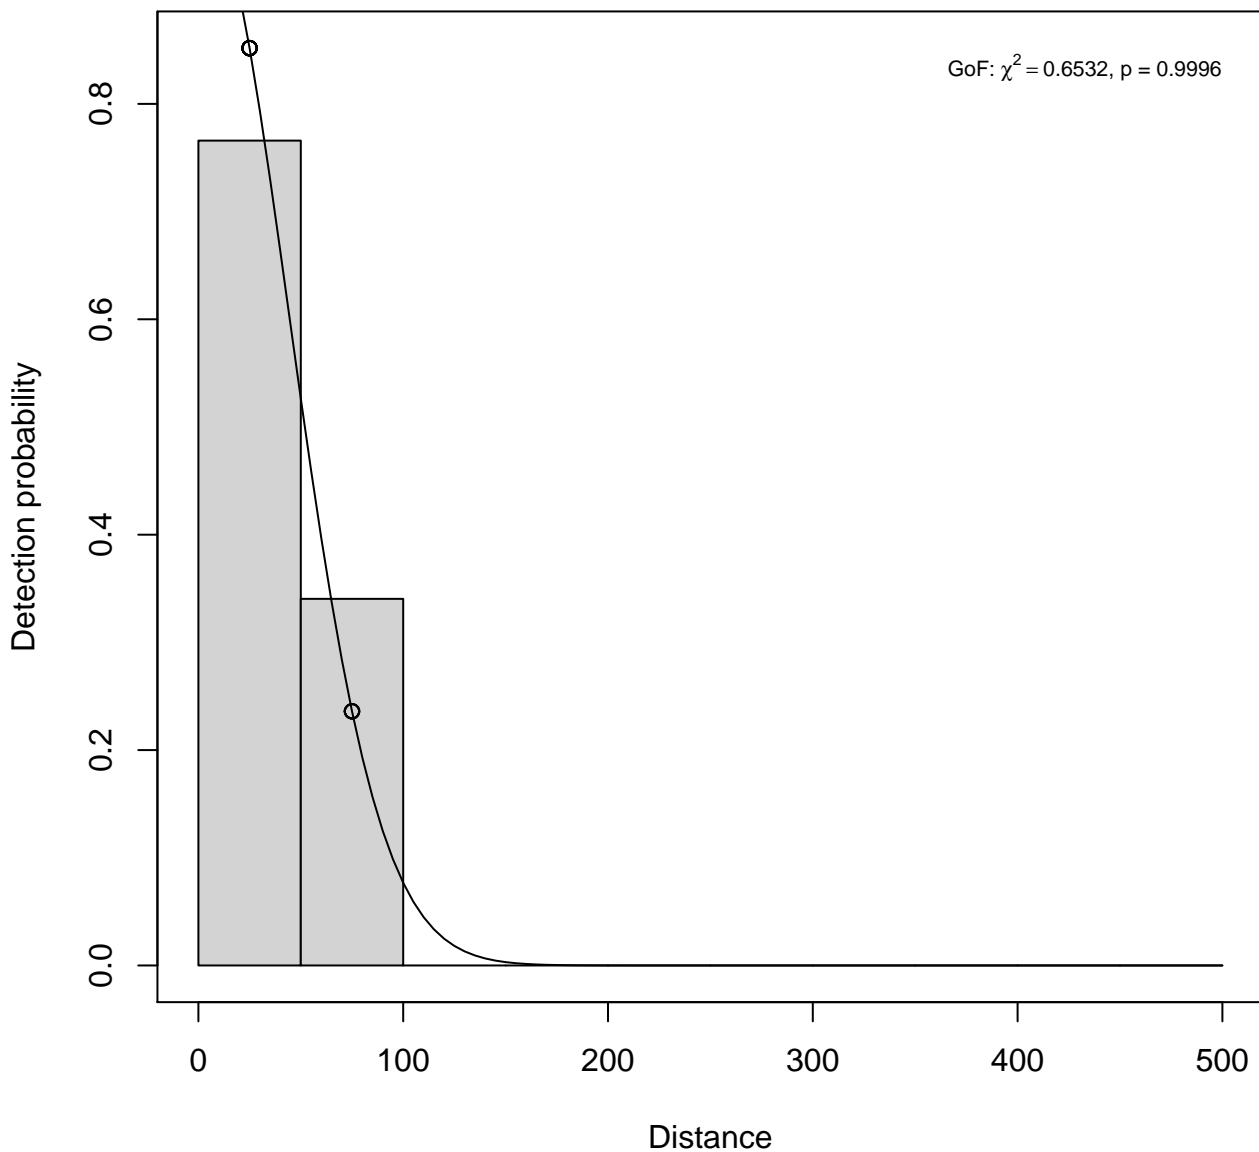

GoF:  $\chi^2 = \text{NA}$ ,  $p = \text{NA}$

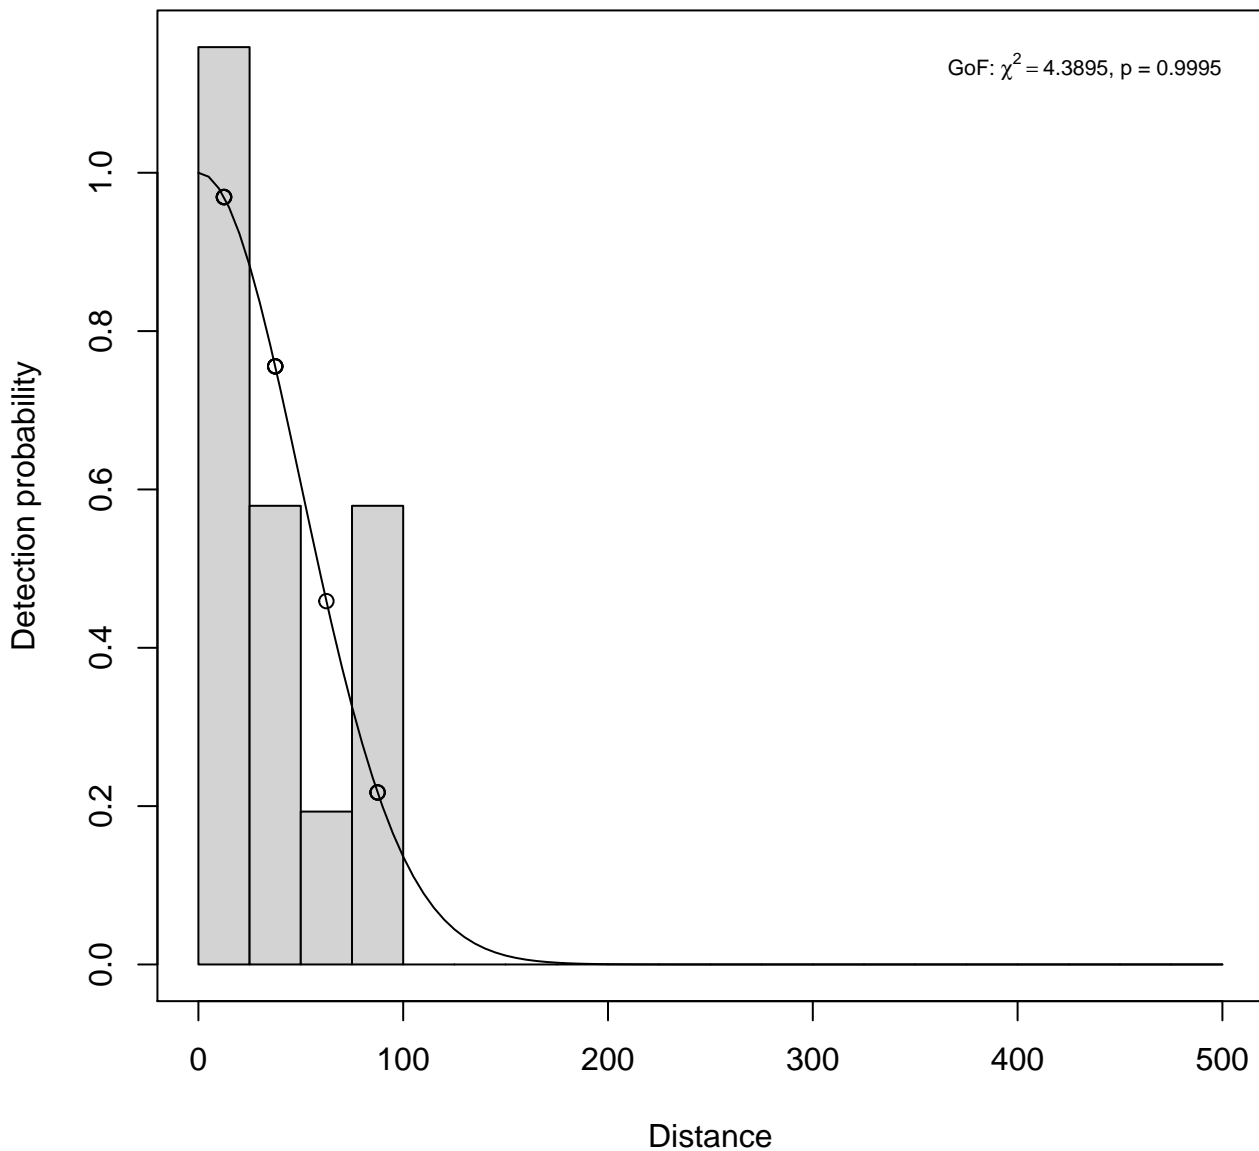

Supplement: s1 [file s1]
