# Supplementary material
Source: MDPI journal article supplement (https://www.mdpi.com/1424-2818/13/7/300)

# Brotoyeris chiriri – Pantanal – Bolivia

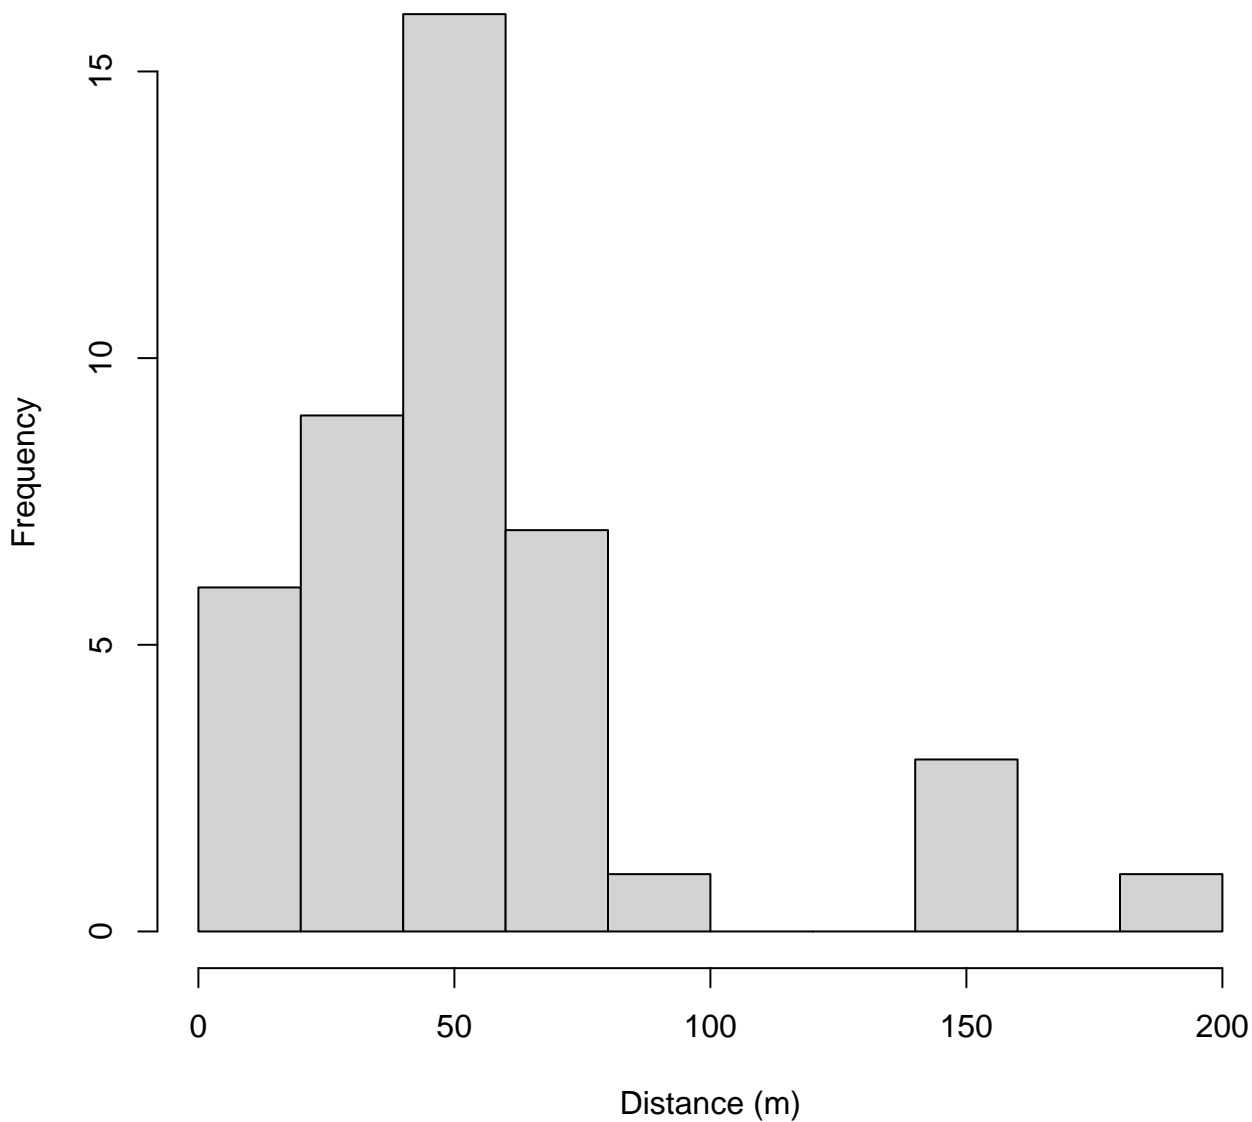

# Brotoyeris chiriri – Pantanal – Bolivia

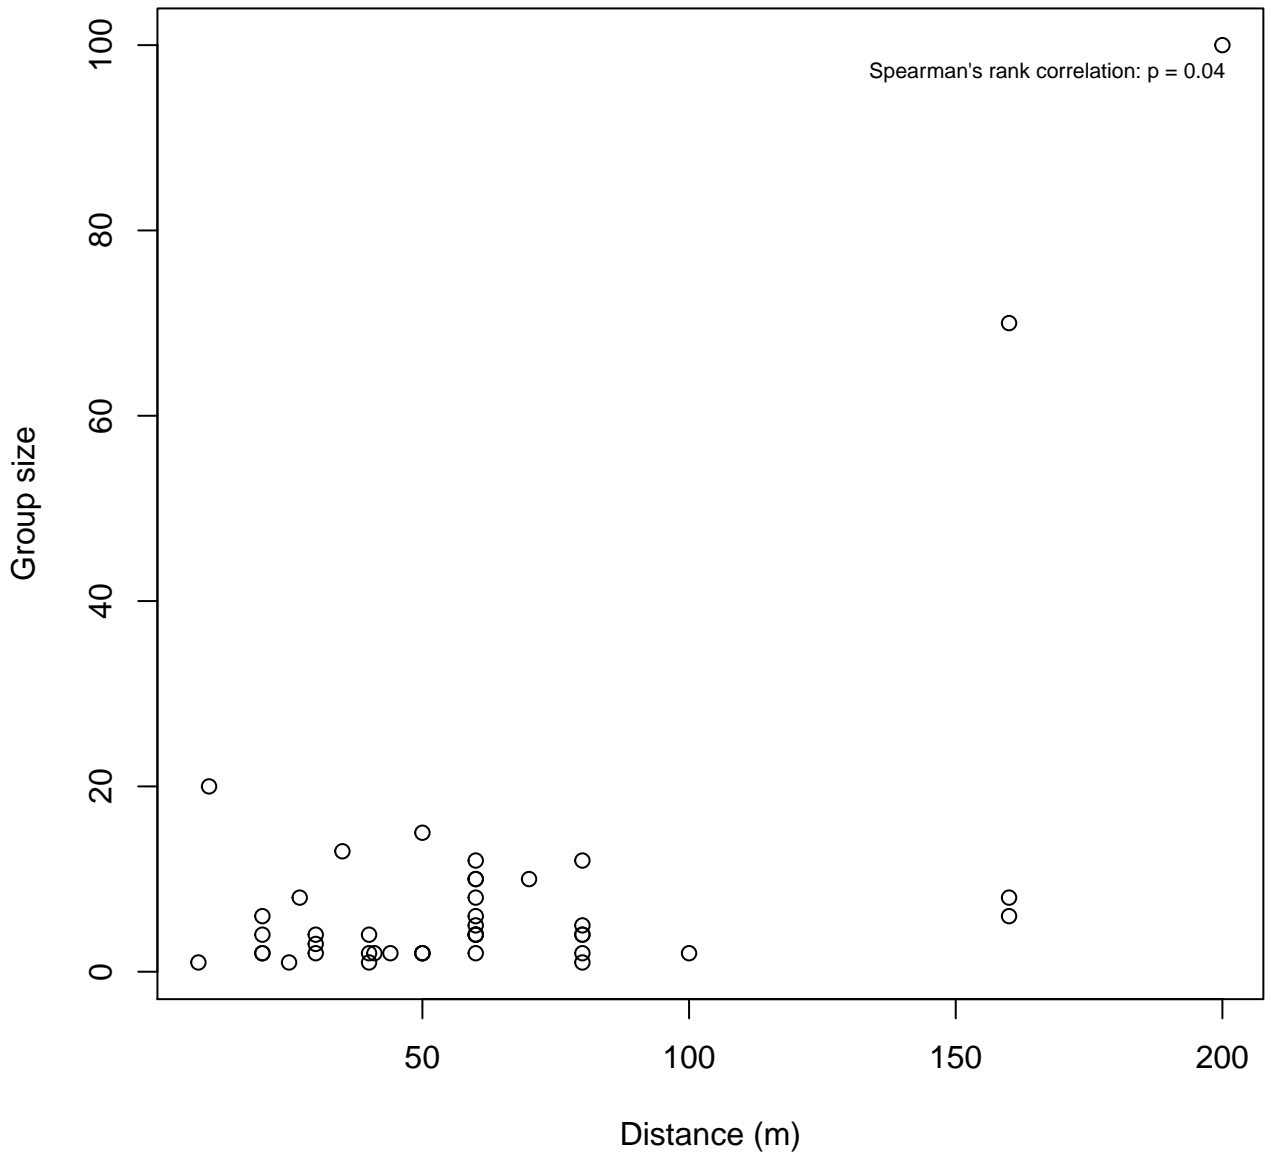

Brotogeris chiriri – Pantanal – Bolivia (N = 43, key function = hr)

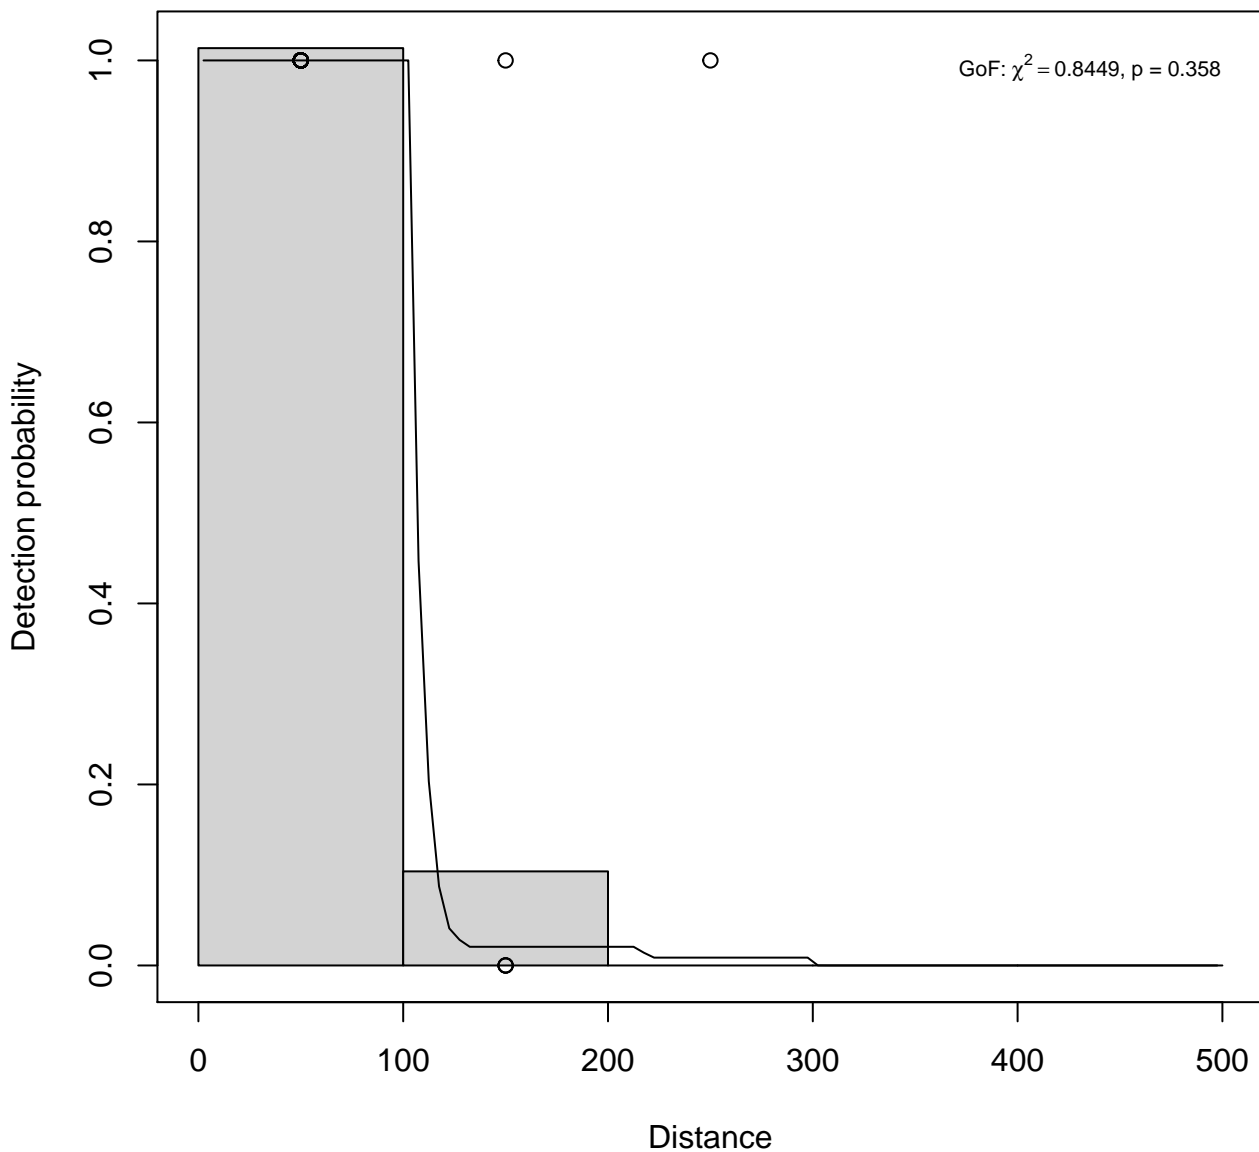

Brotogeris chiriri – Pantanal – Bolivia (N = 43, key function = hr)

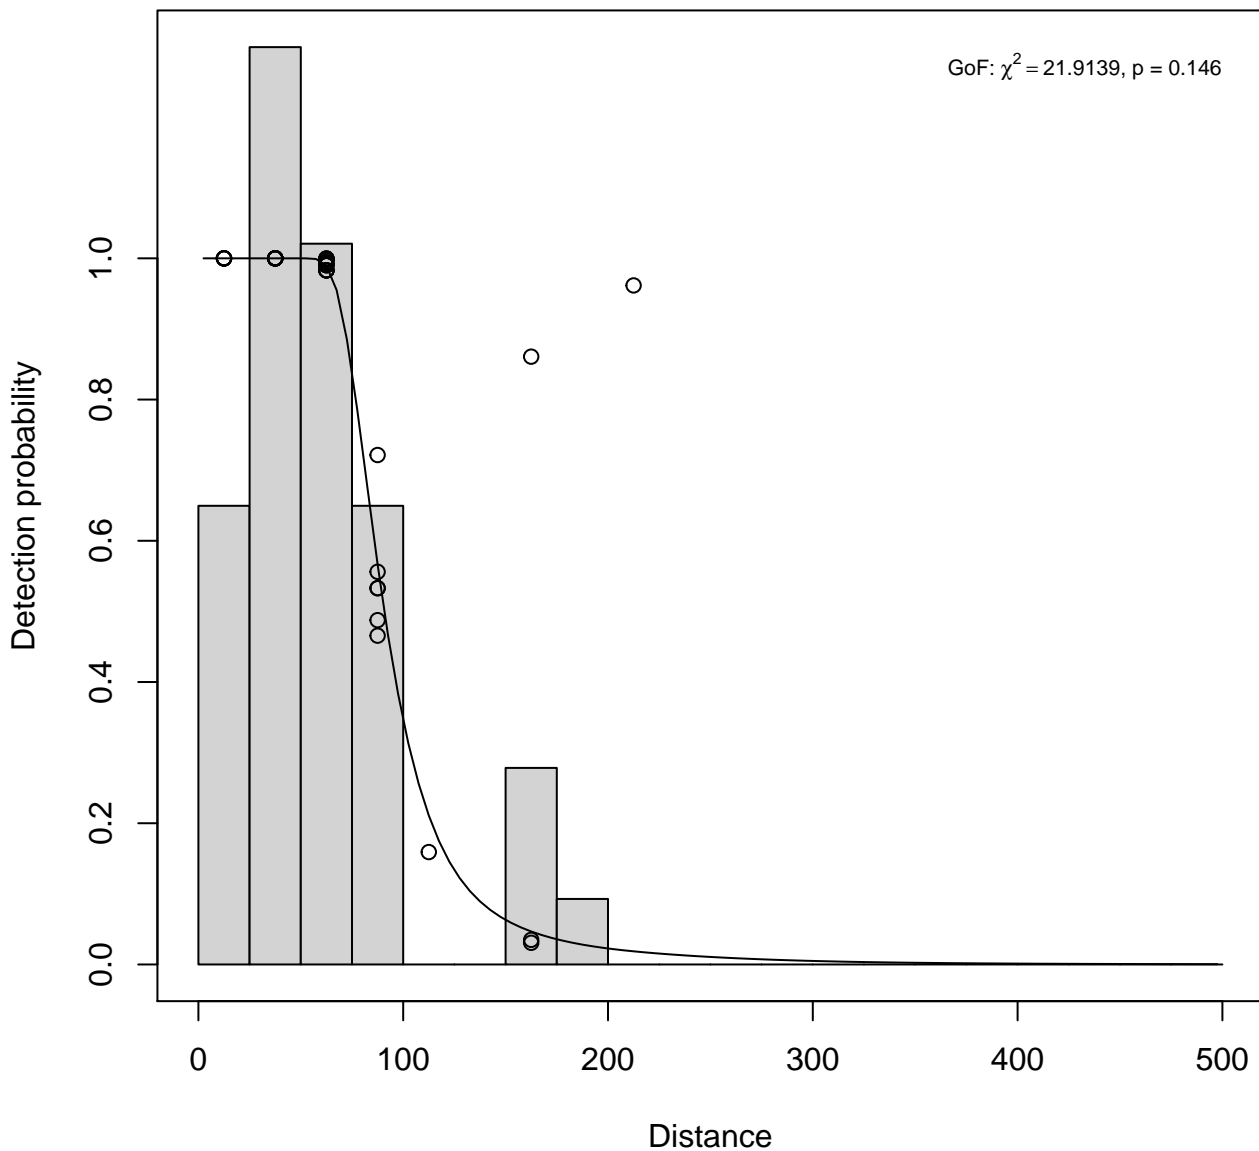

Brotogeris chiriri – Pantanal – Bolivia (N = 43, key function = hr)

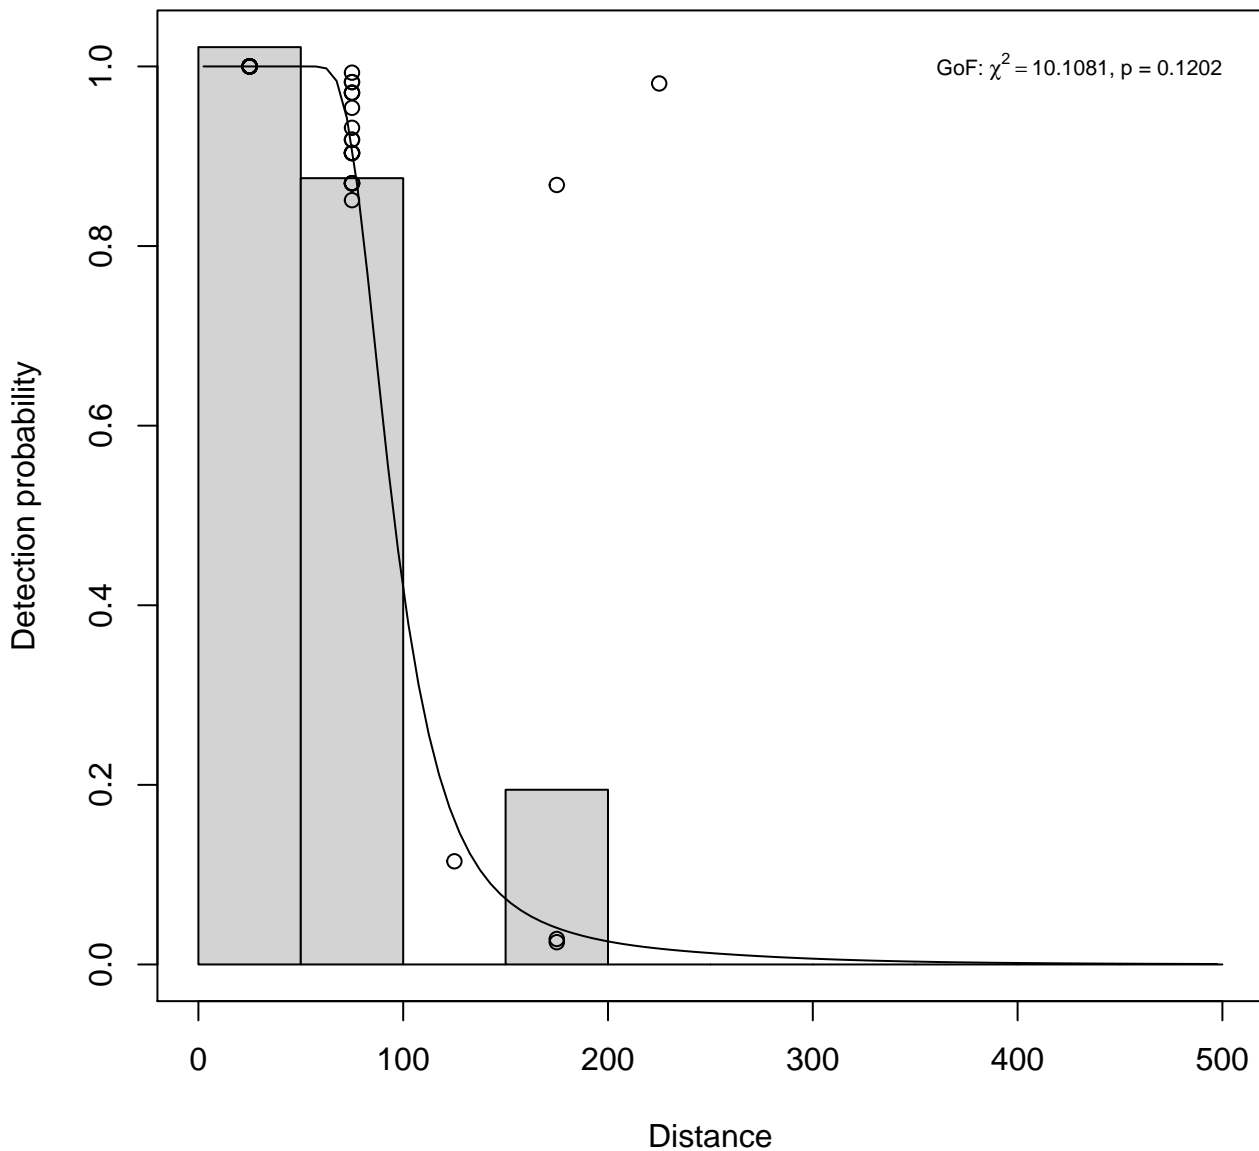

Supplement: s1 [file s1]
