# Supplementary material
Source: MDPI journal article supplement (https://www.mdpi.com/1424-2818/13/7/300)

# **Myiopsitta monachus – Dry Chaco – Paraguay**

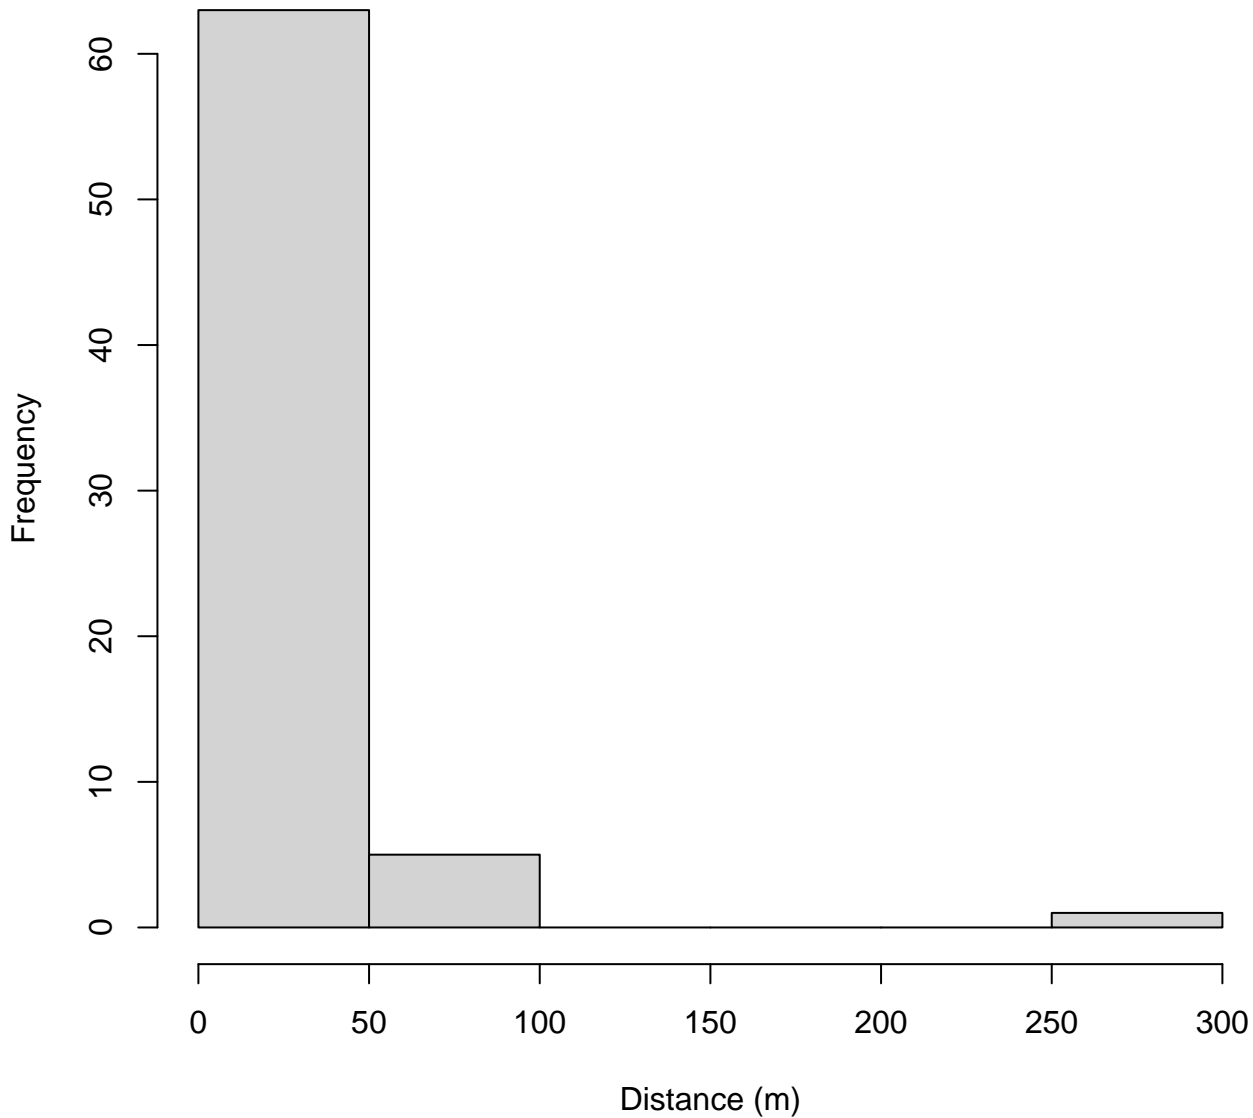

# Myiopsitta monachus – Dry Chaco – Paraguay

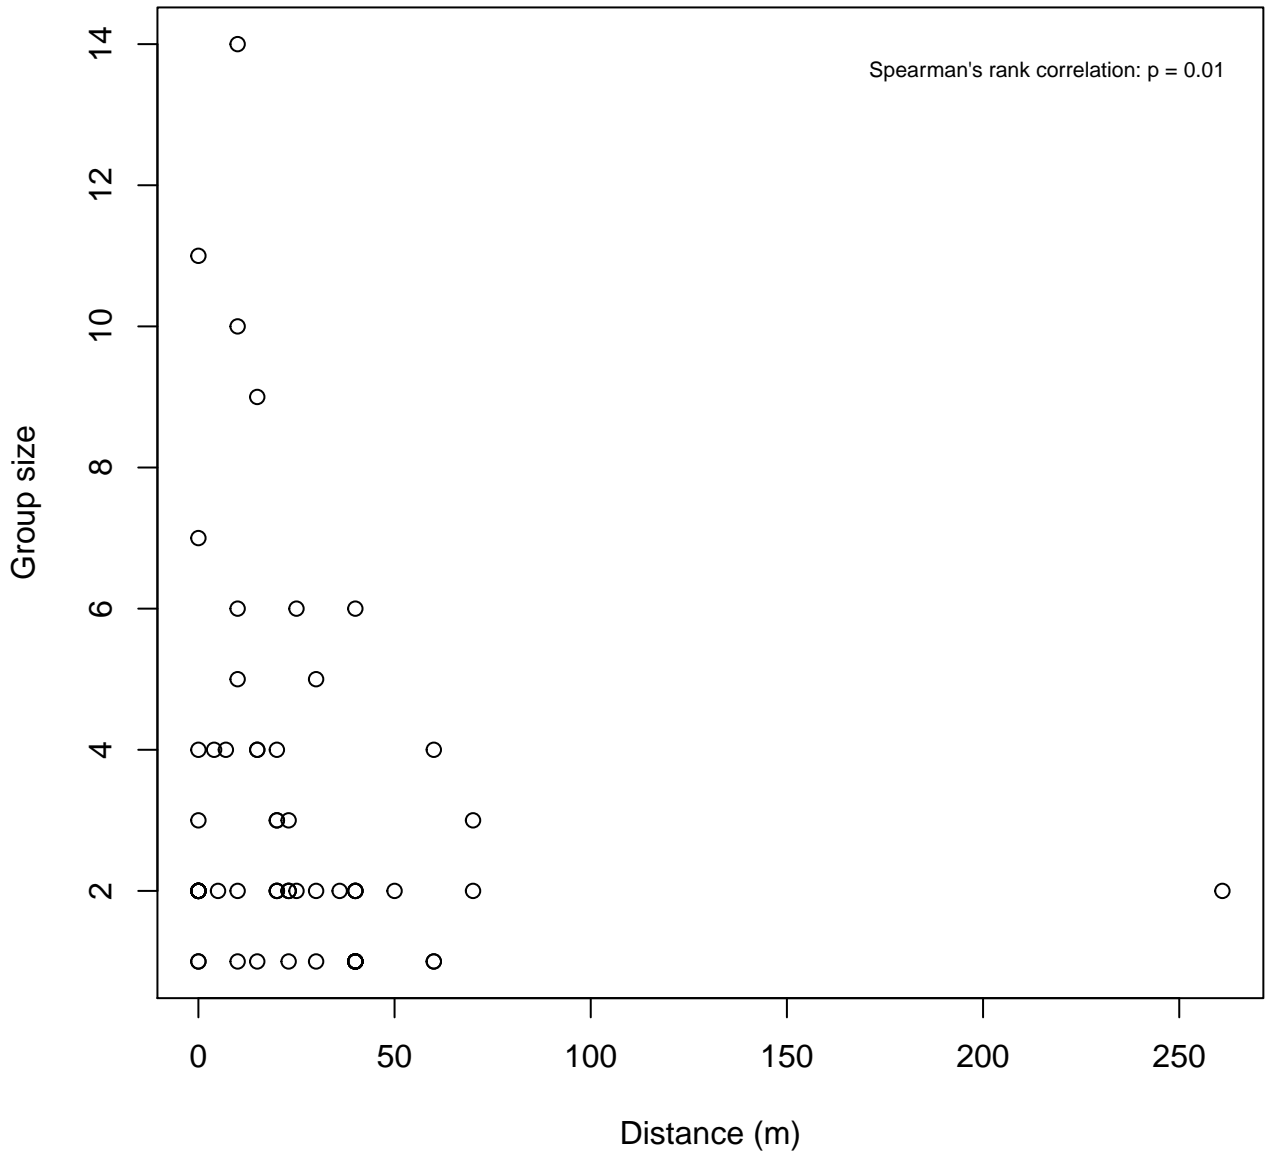

Myiopsitta monachus – Dry Chaco – Paraguay (N = 69, key function = hr)

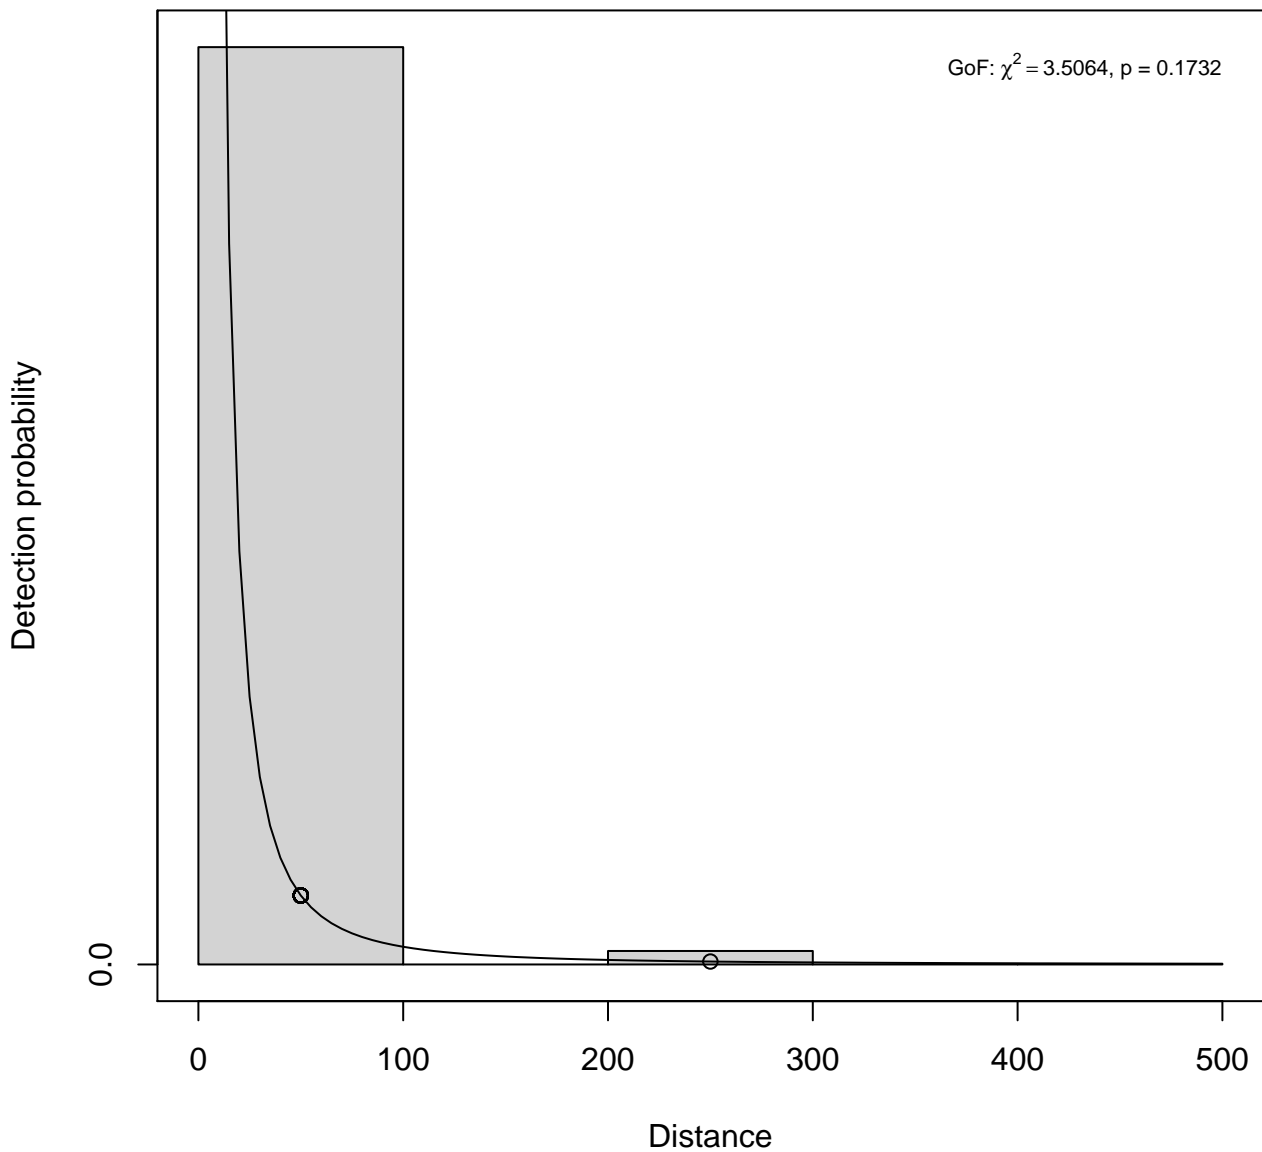

Myiopsitta monachus – Dry Chaco – Paraguay (N = 69, key function = hr)

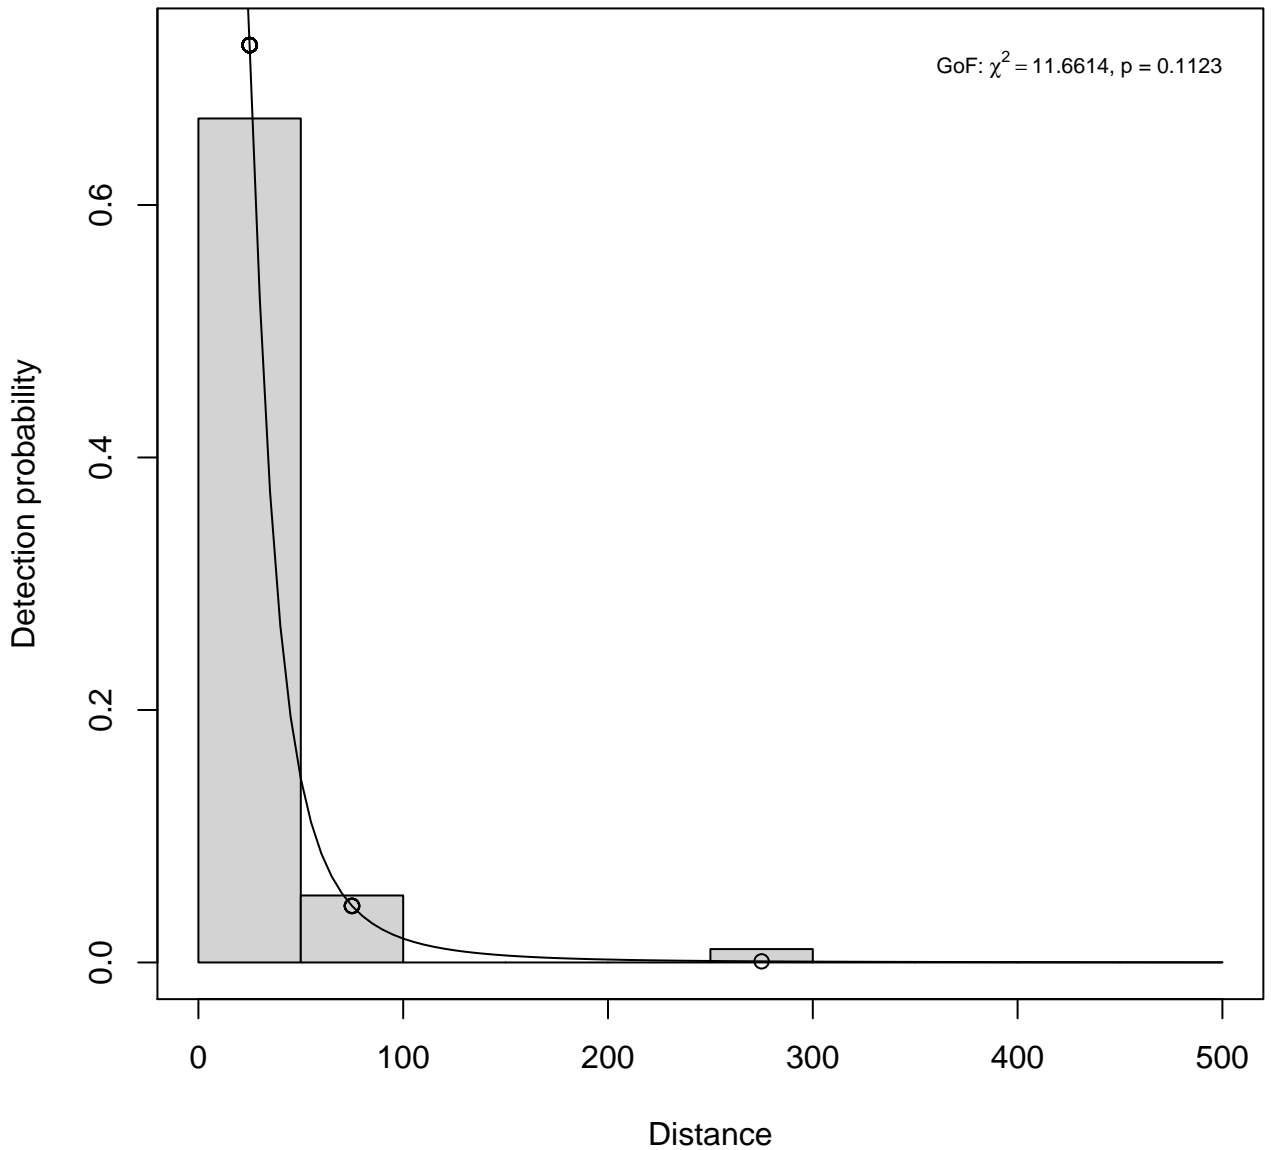

Myiopsitta monachus – Dry Chaco – Paraguay (N = 69, key function = hr)

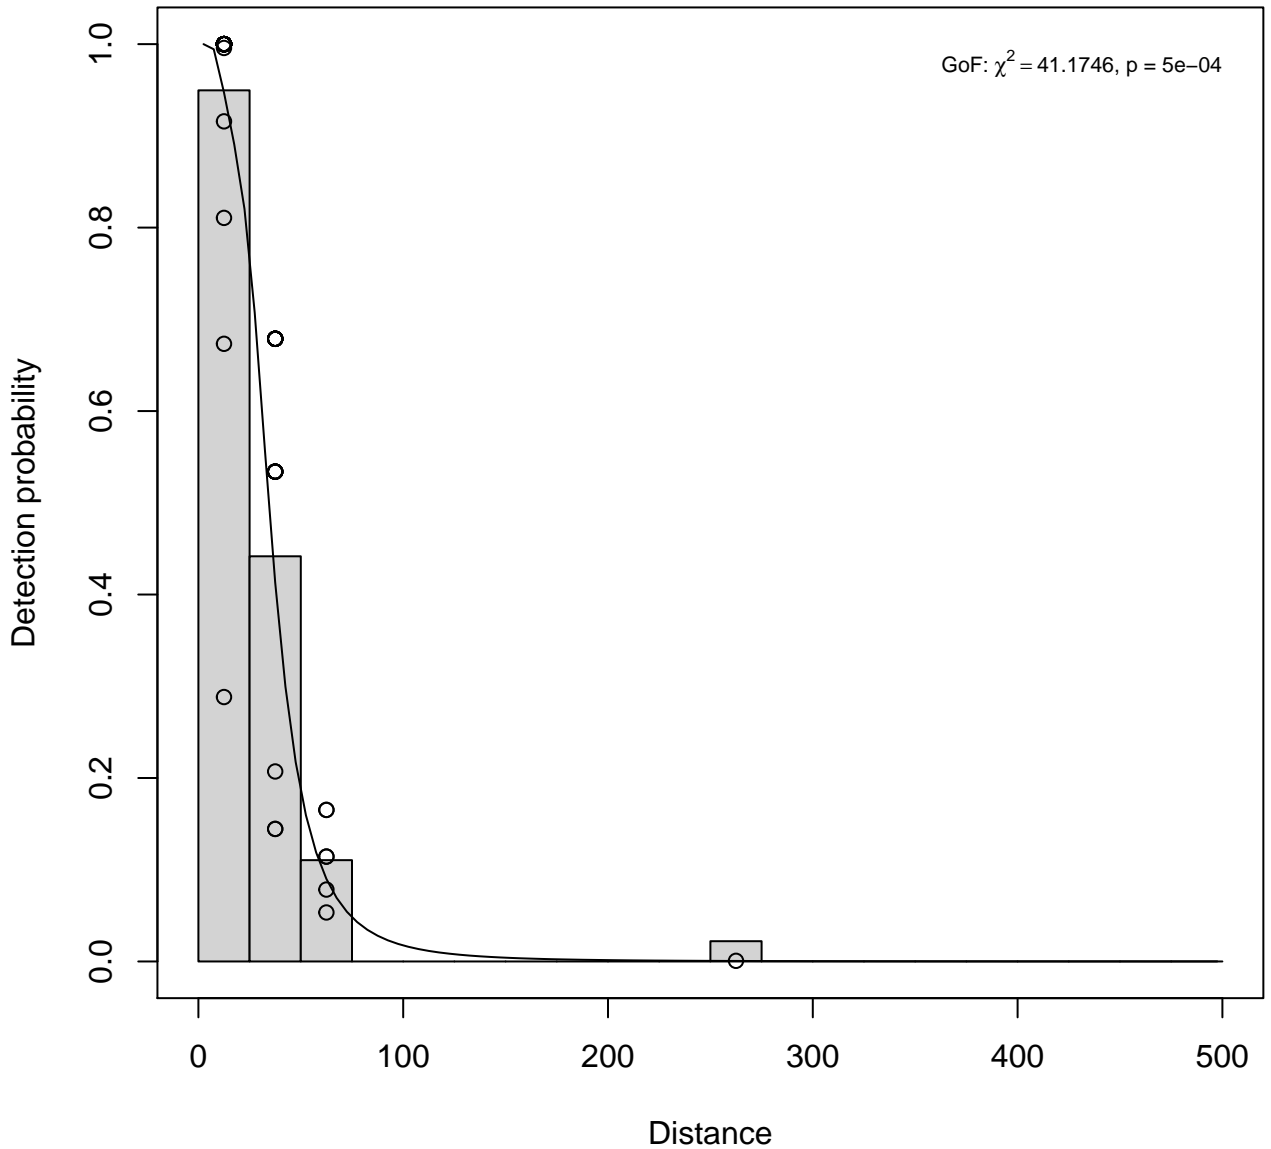

Supplement: s1 [file s1]
