# Supplementary material
Source: MDPI journal article supplement (https://www.mdpi.com/1424-2818/13/7/300)

# Amazona guatemalae – Isthmian–Atlantic moist forests – Costa Rica

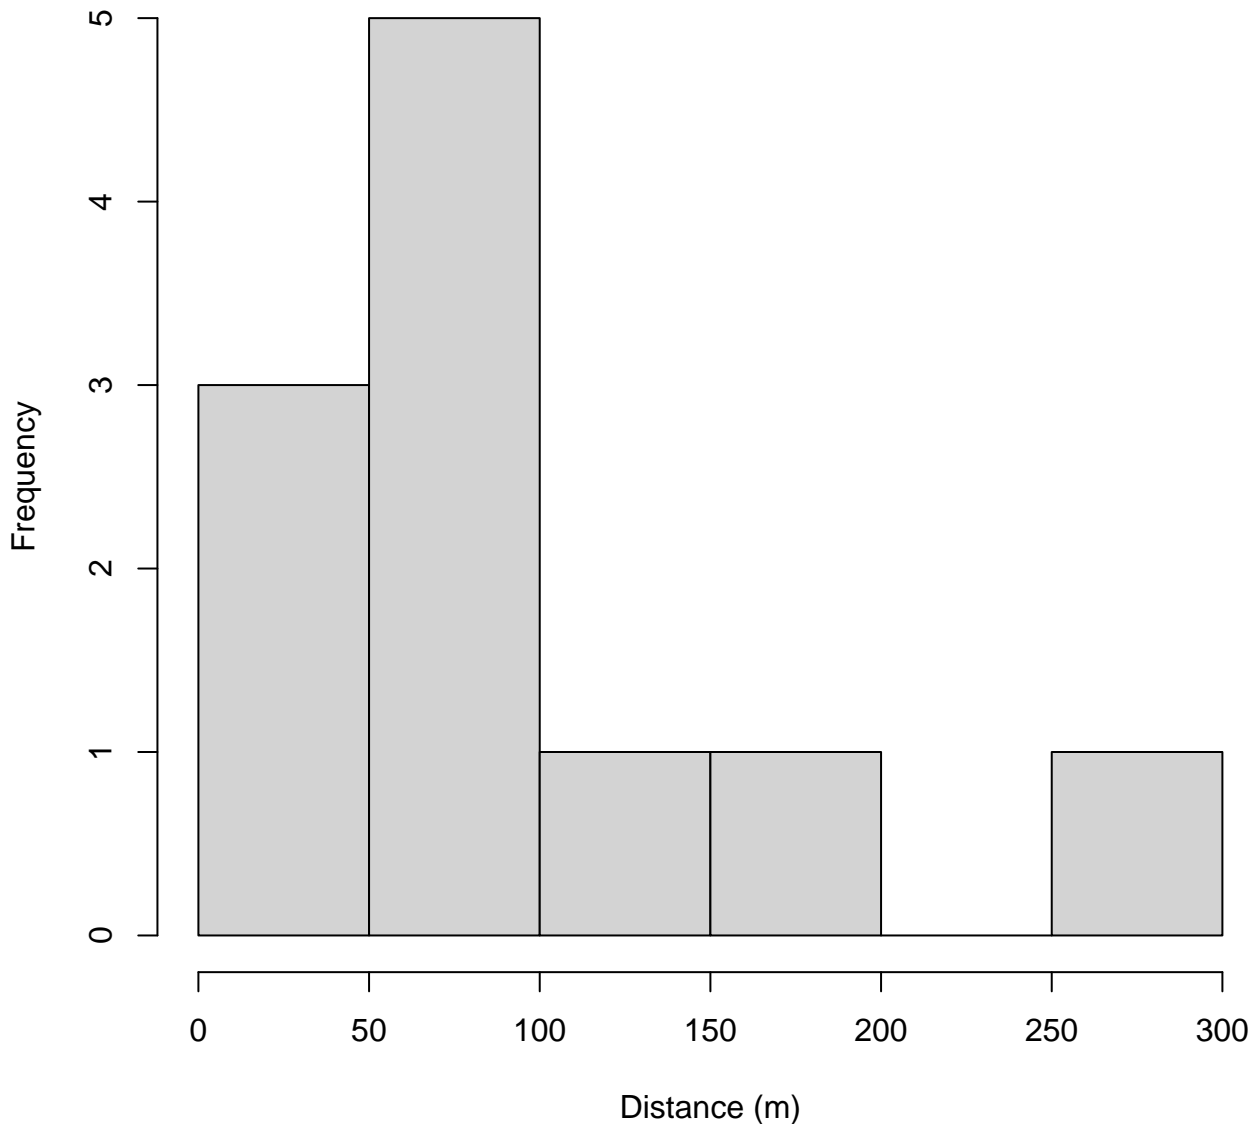

# Amazona guatemalae – Isthmian–Atlantic moist forests – Costa Rica

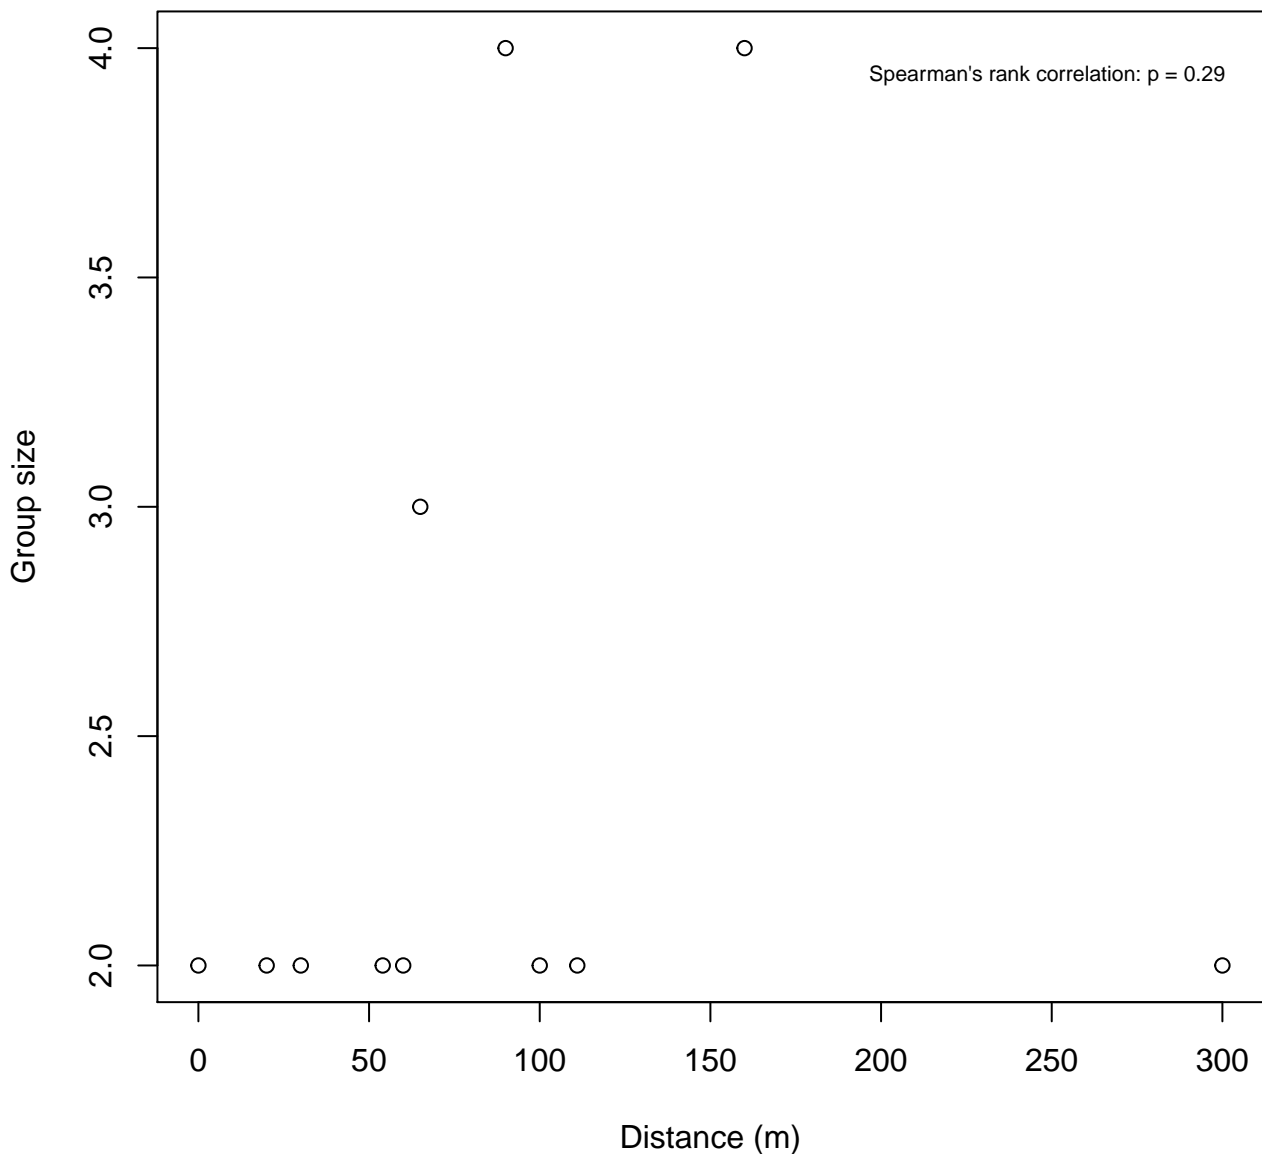

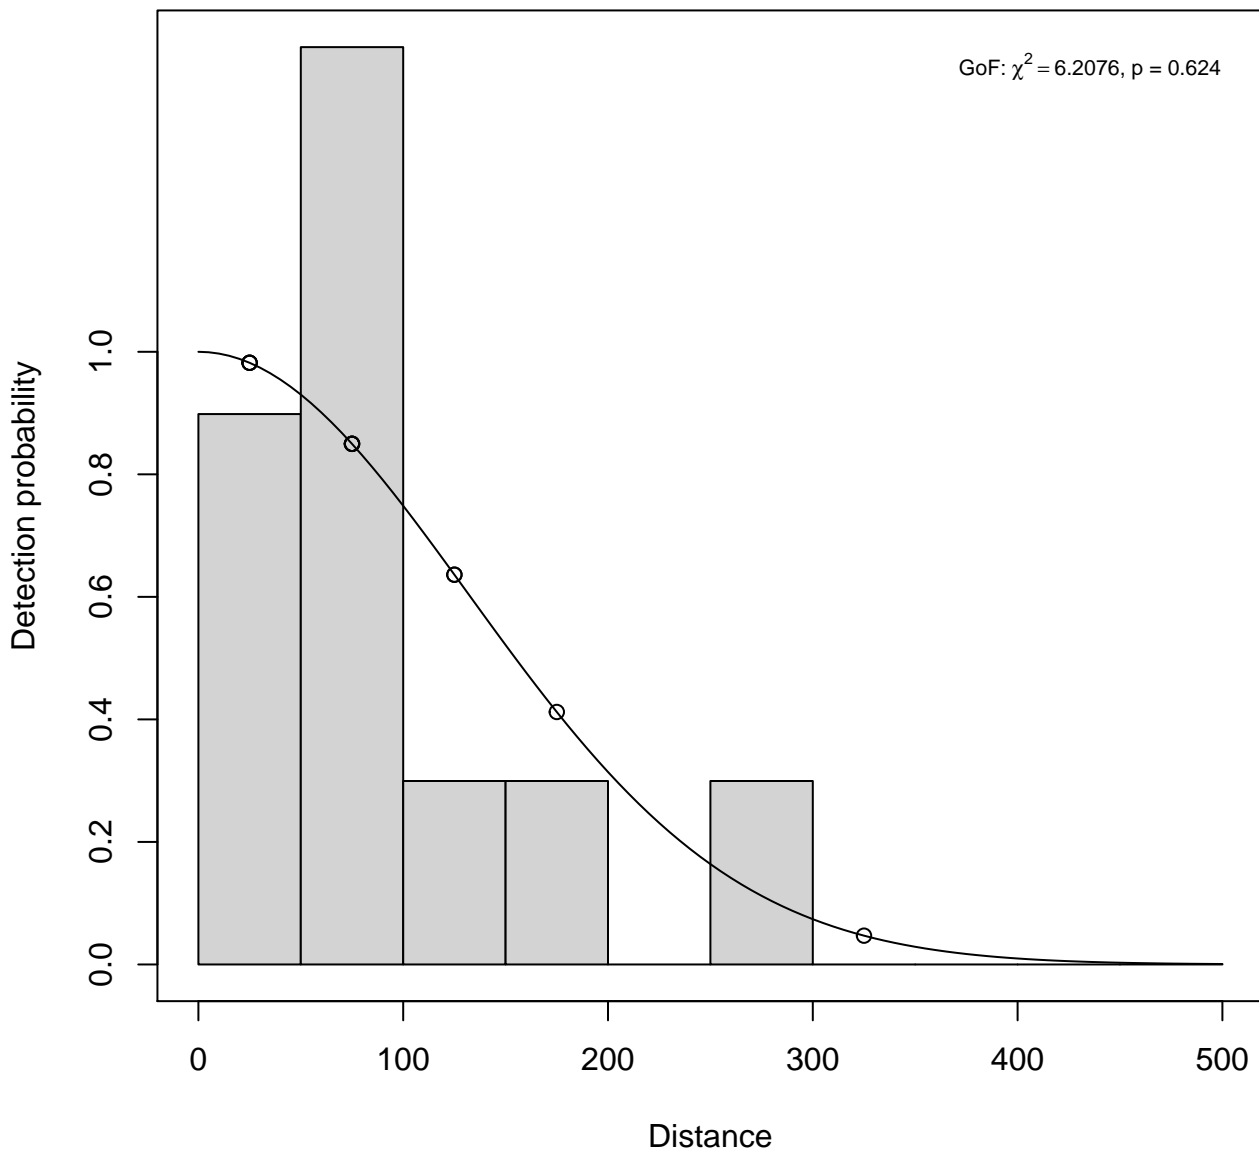

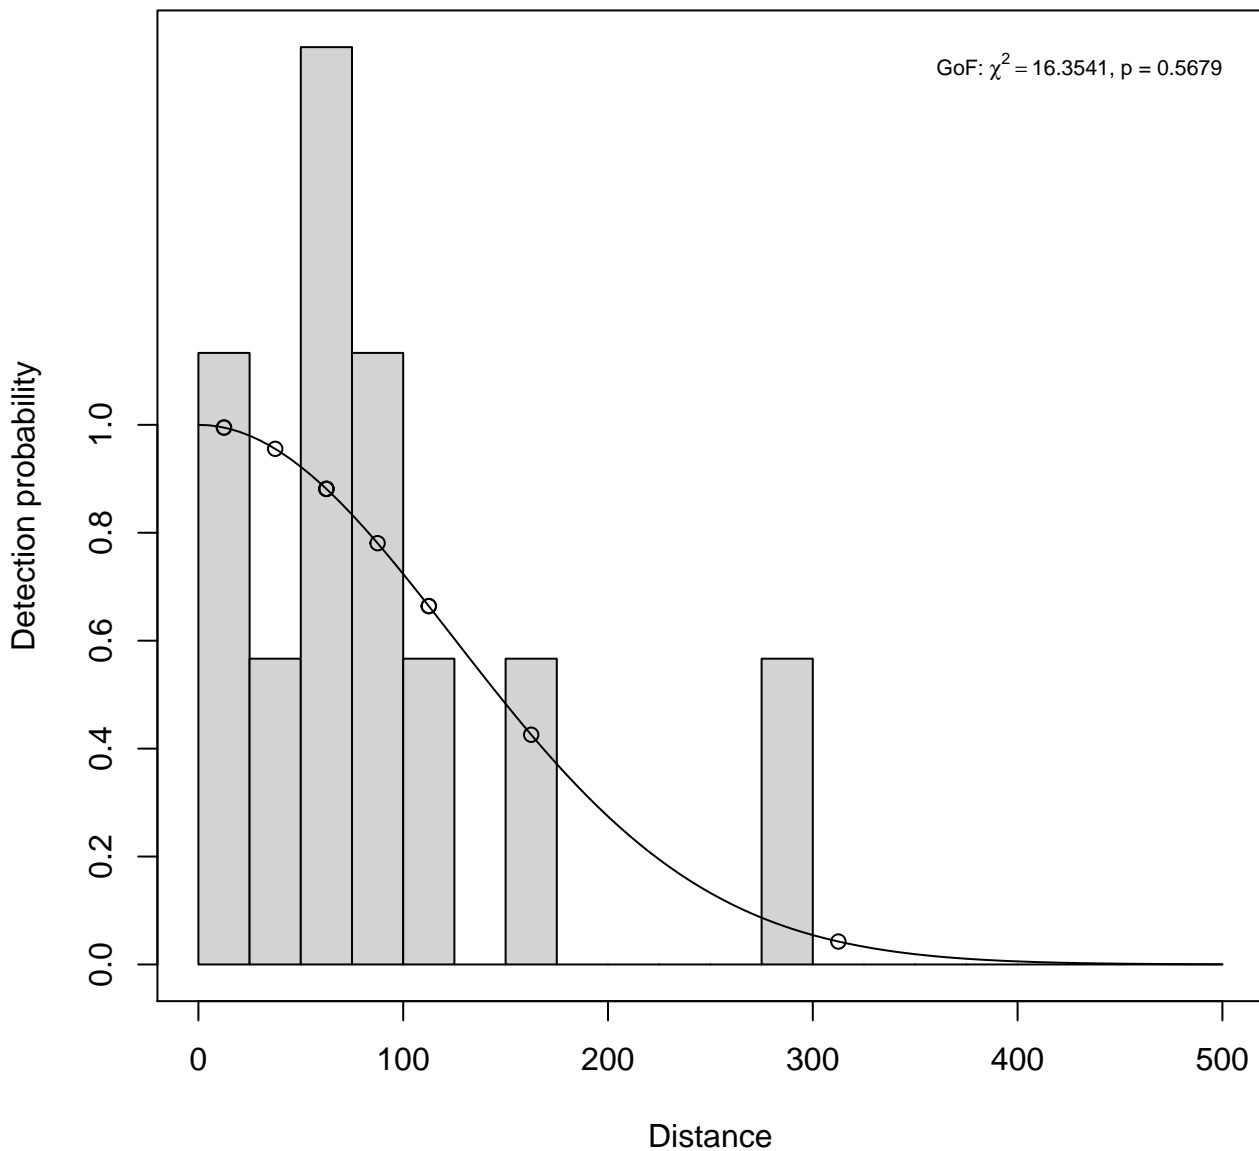

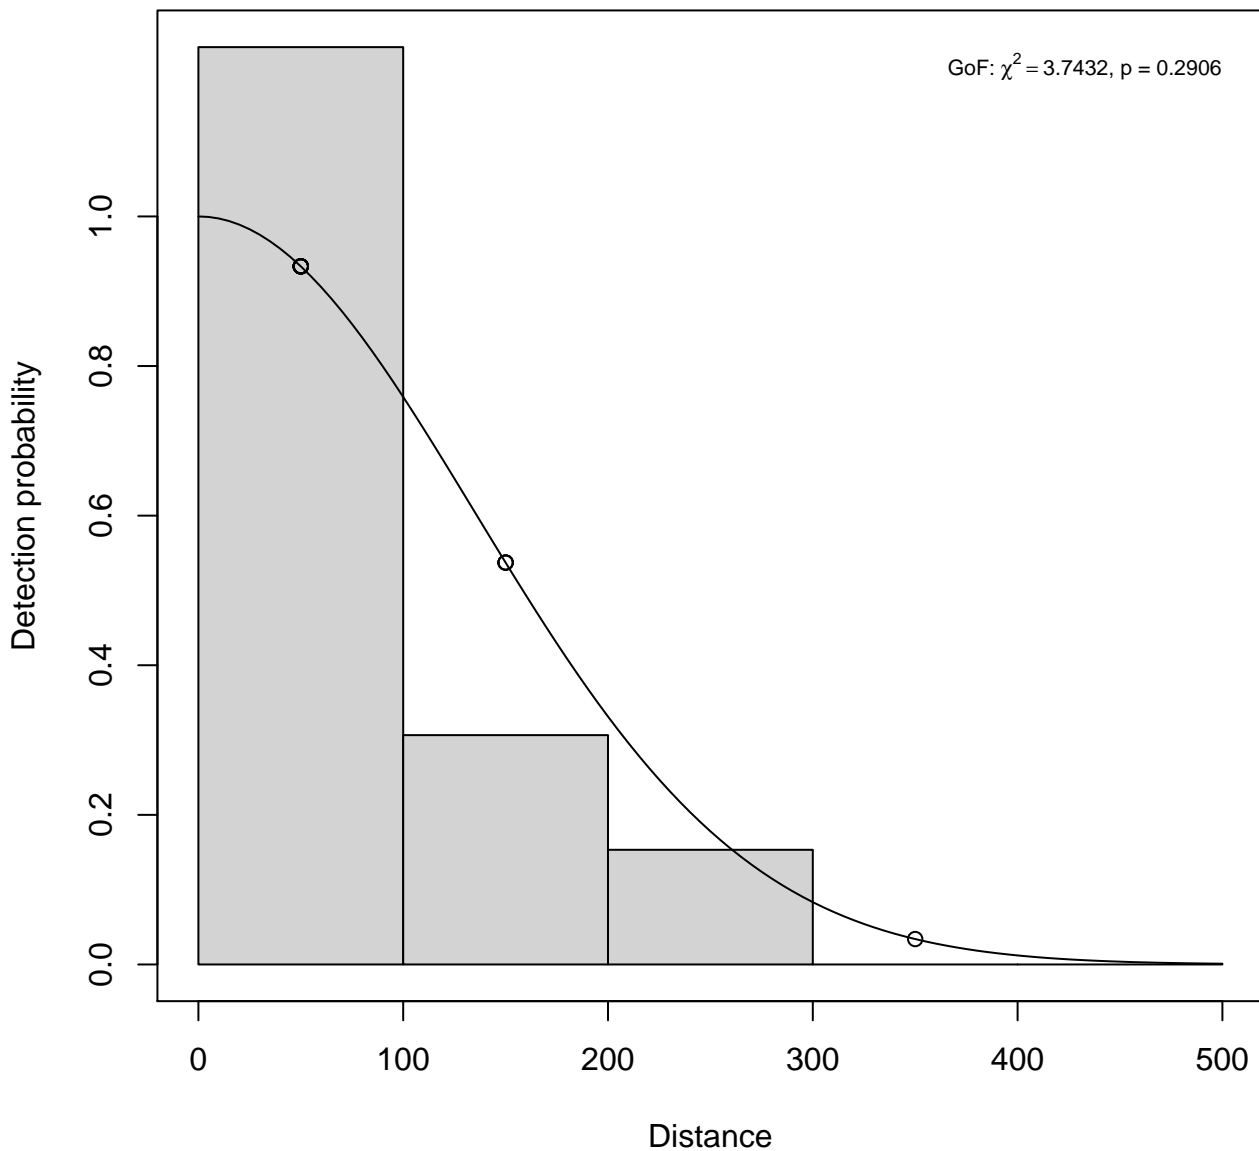

Supplement: s1 [file s1]
