# Supplementary material
Source: MDPI journal article supplement (https://www.mdpi.com/1424-2818/13/7/300)

# **Brotogeris cyanoptera – Ucayali moist forests – Peru**

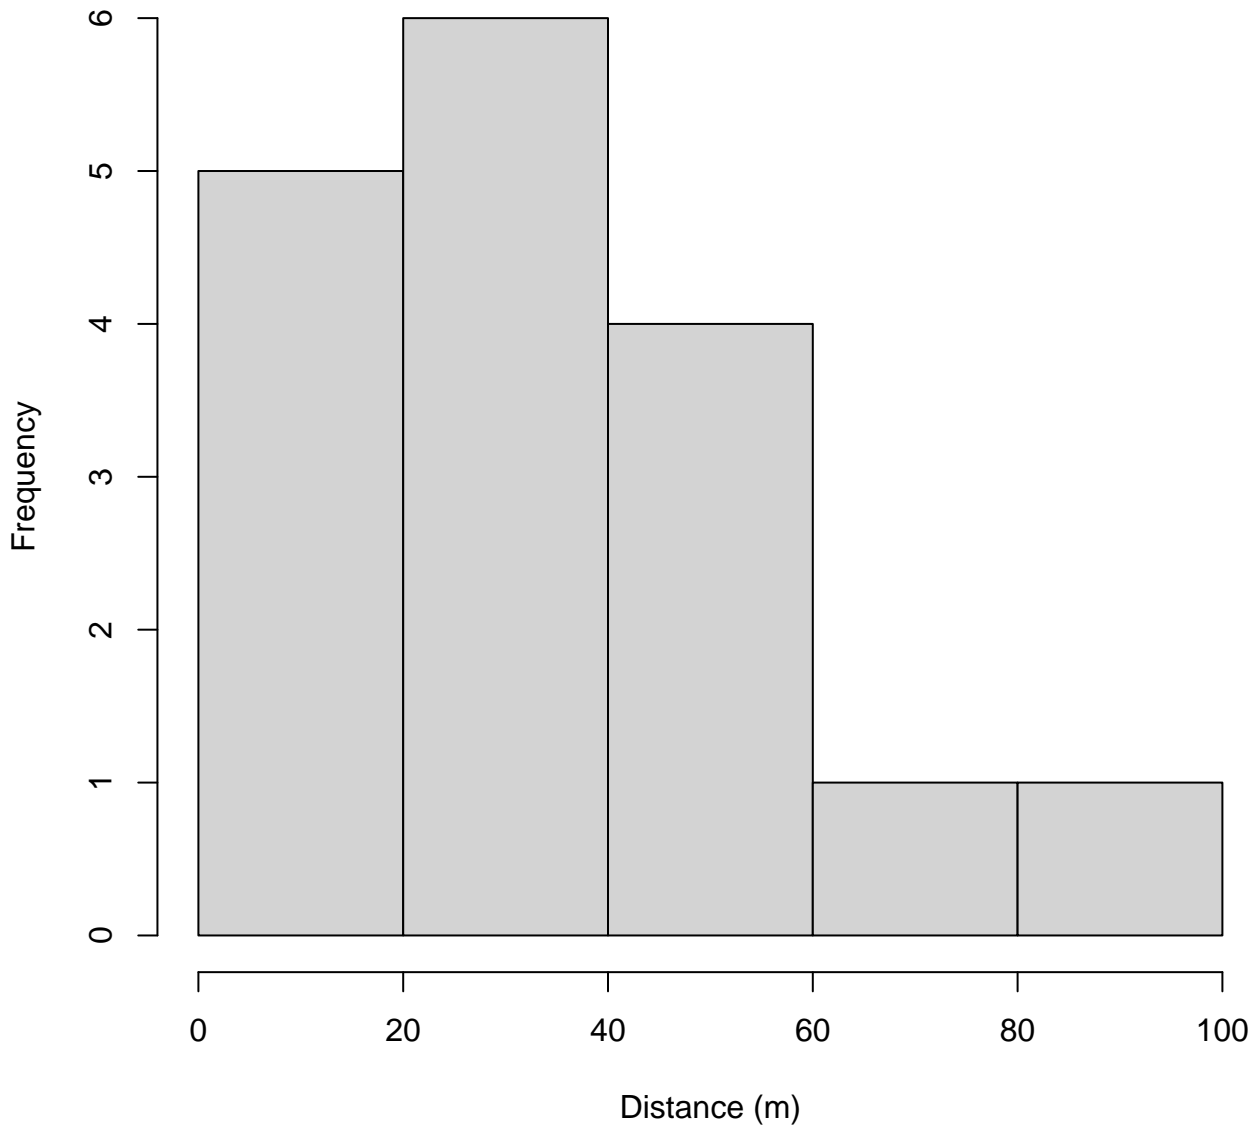

# Brotogeris cyanoptera – Ucayali moist forests – Peru

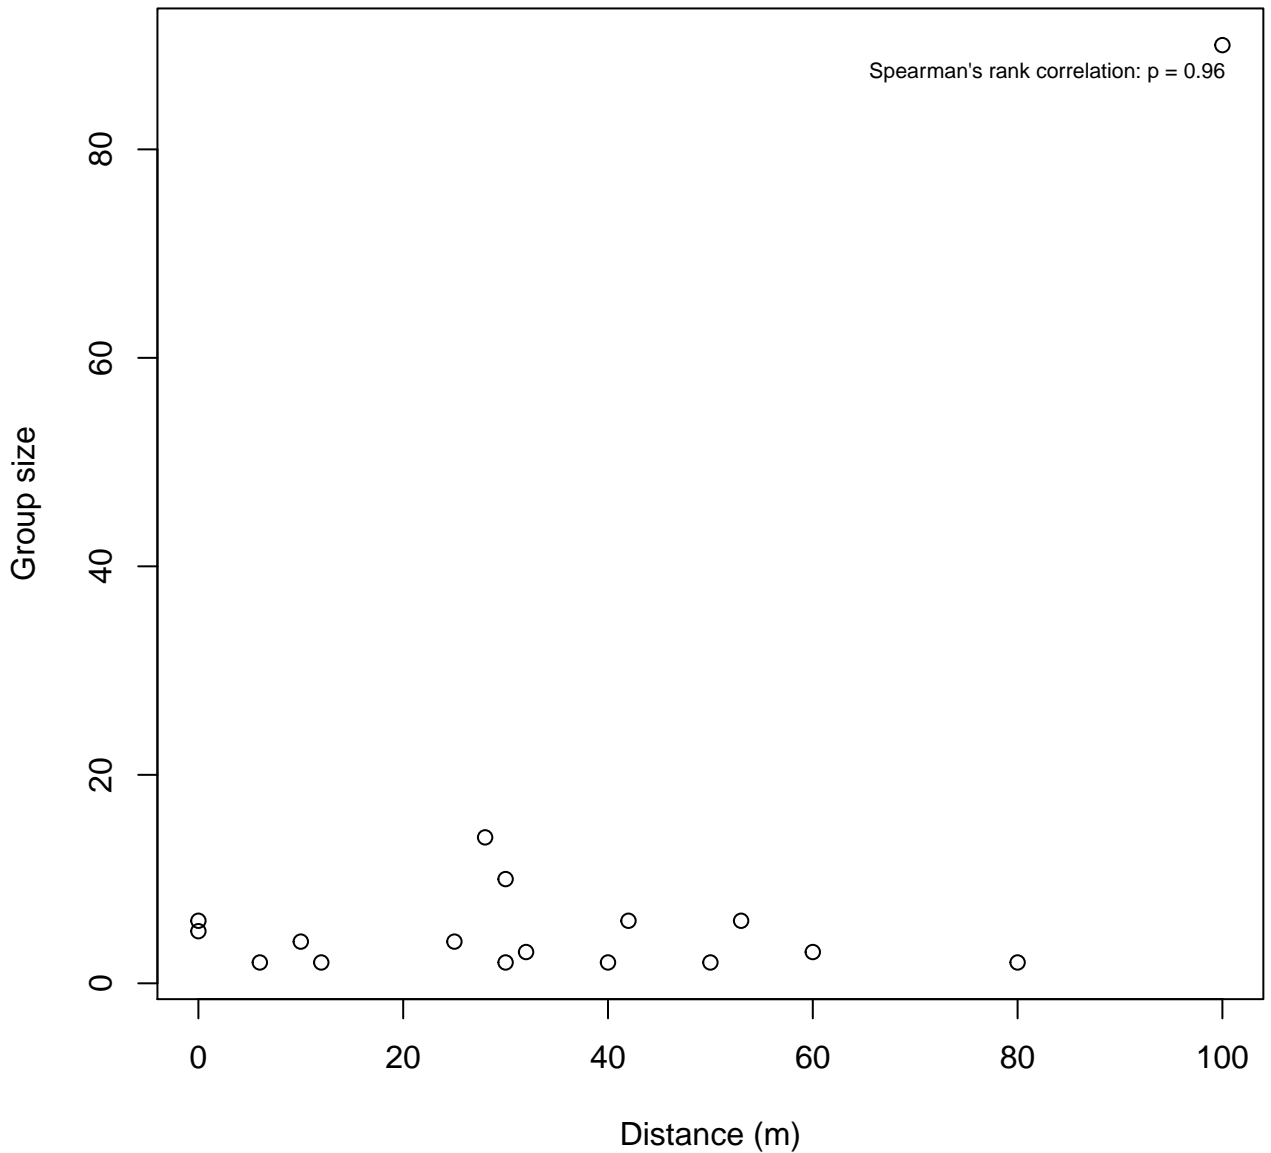

Brotogeris cyanoptera – Ucayali moist forests – Peru (N = 17, key function = hn)

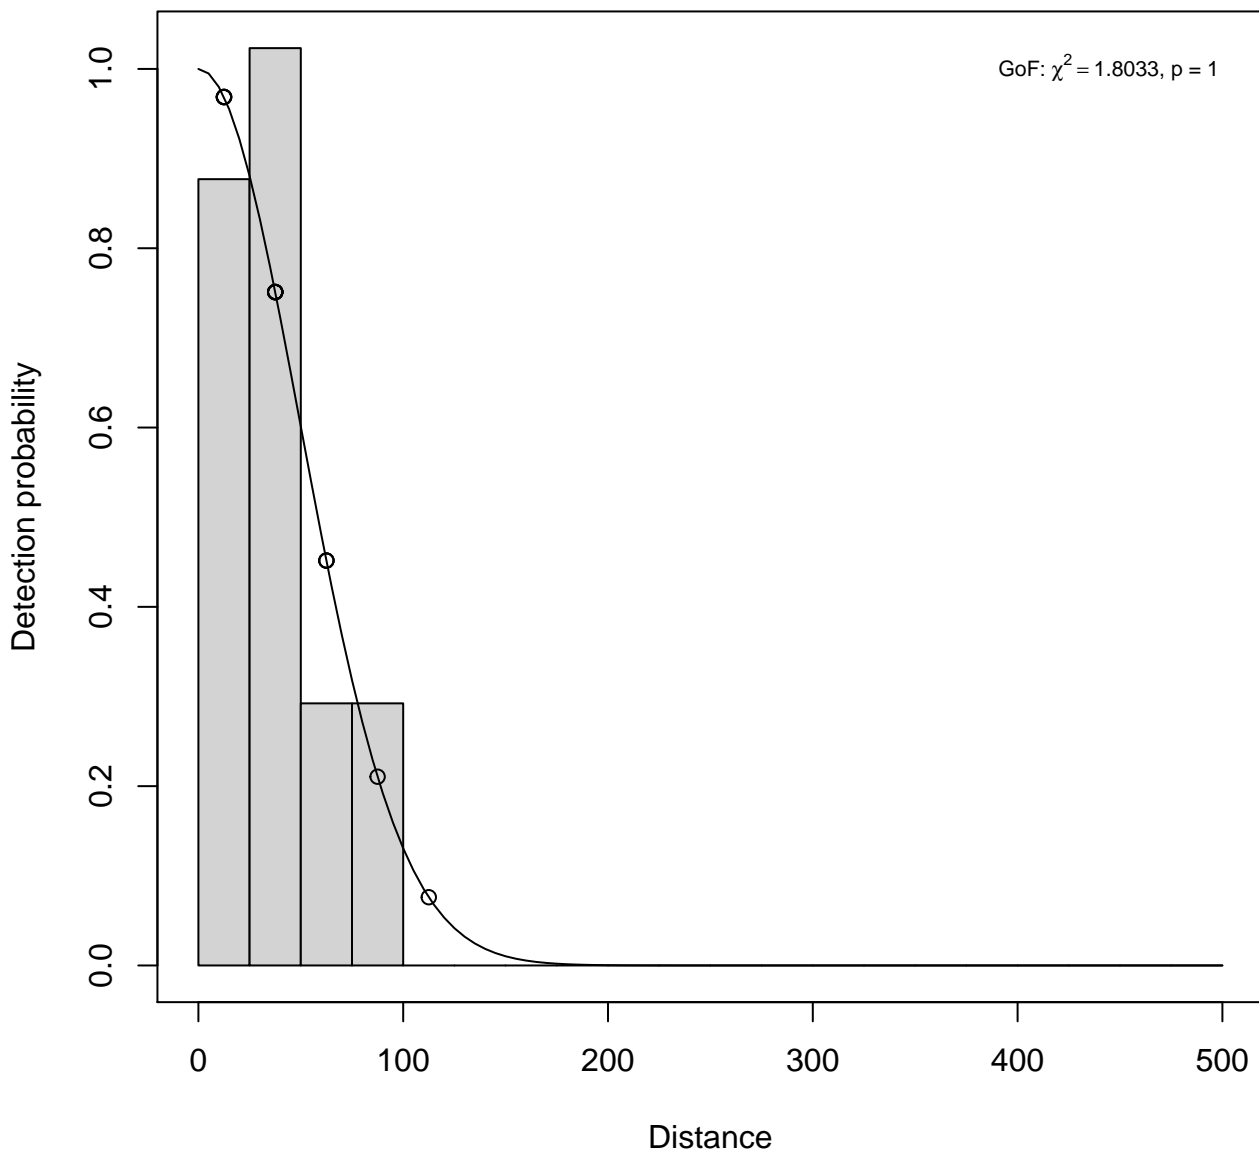

Brotogetis cyanoptera – Ucayali moist forests – Peru (N = 17, key function = hn)

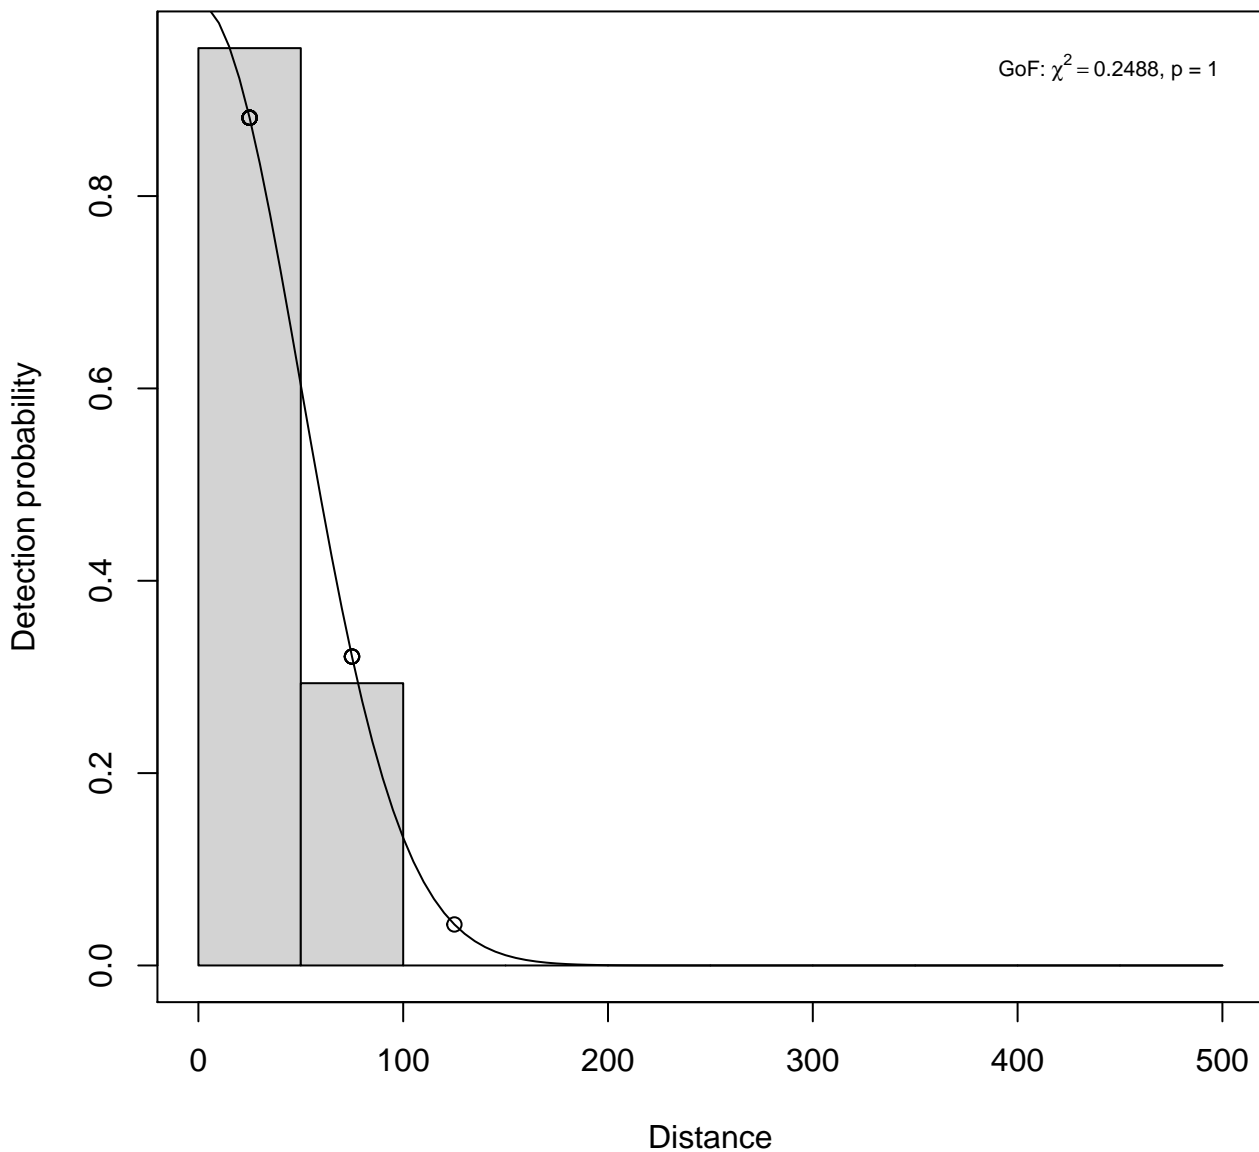

Brotogeris cyanoptera – Ucayali moist forests – Peru (N = 17, key function = hn)

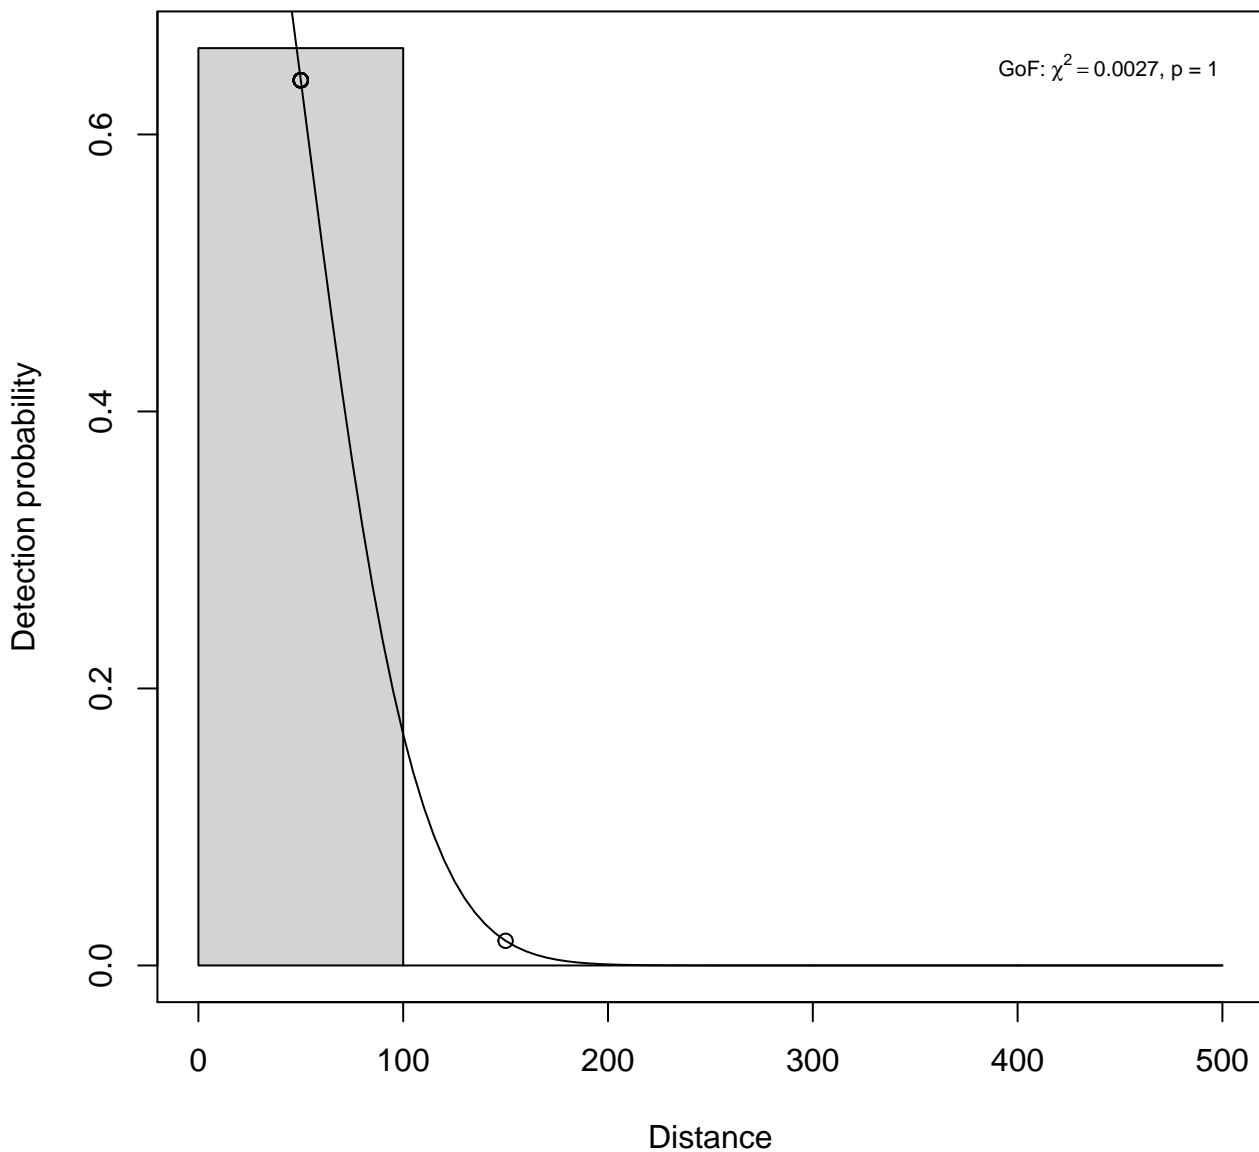

Supplement: s1 [file s1]
