# Supplementary material
Source: MDPI journal article supplement (https://www.mdpi.com/1424-2818/13/7/300)

# **Psittacara leucophthalmus – Peruvian Yungas – Peru**

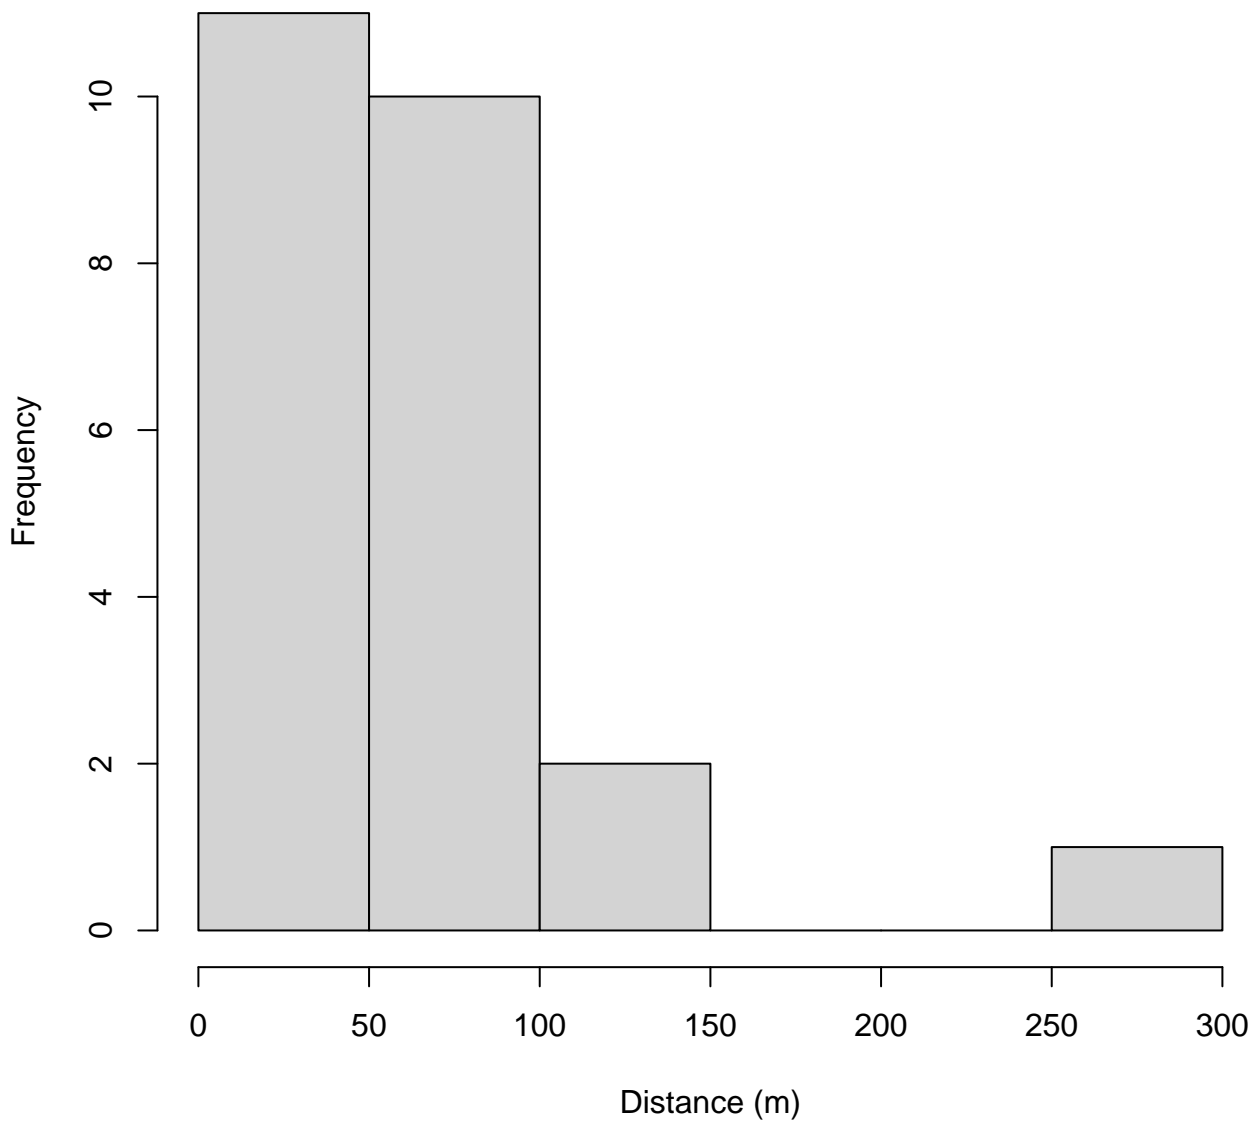

# **Psittacara leucophthalmus – Peruvian Yungas – Peru**

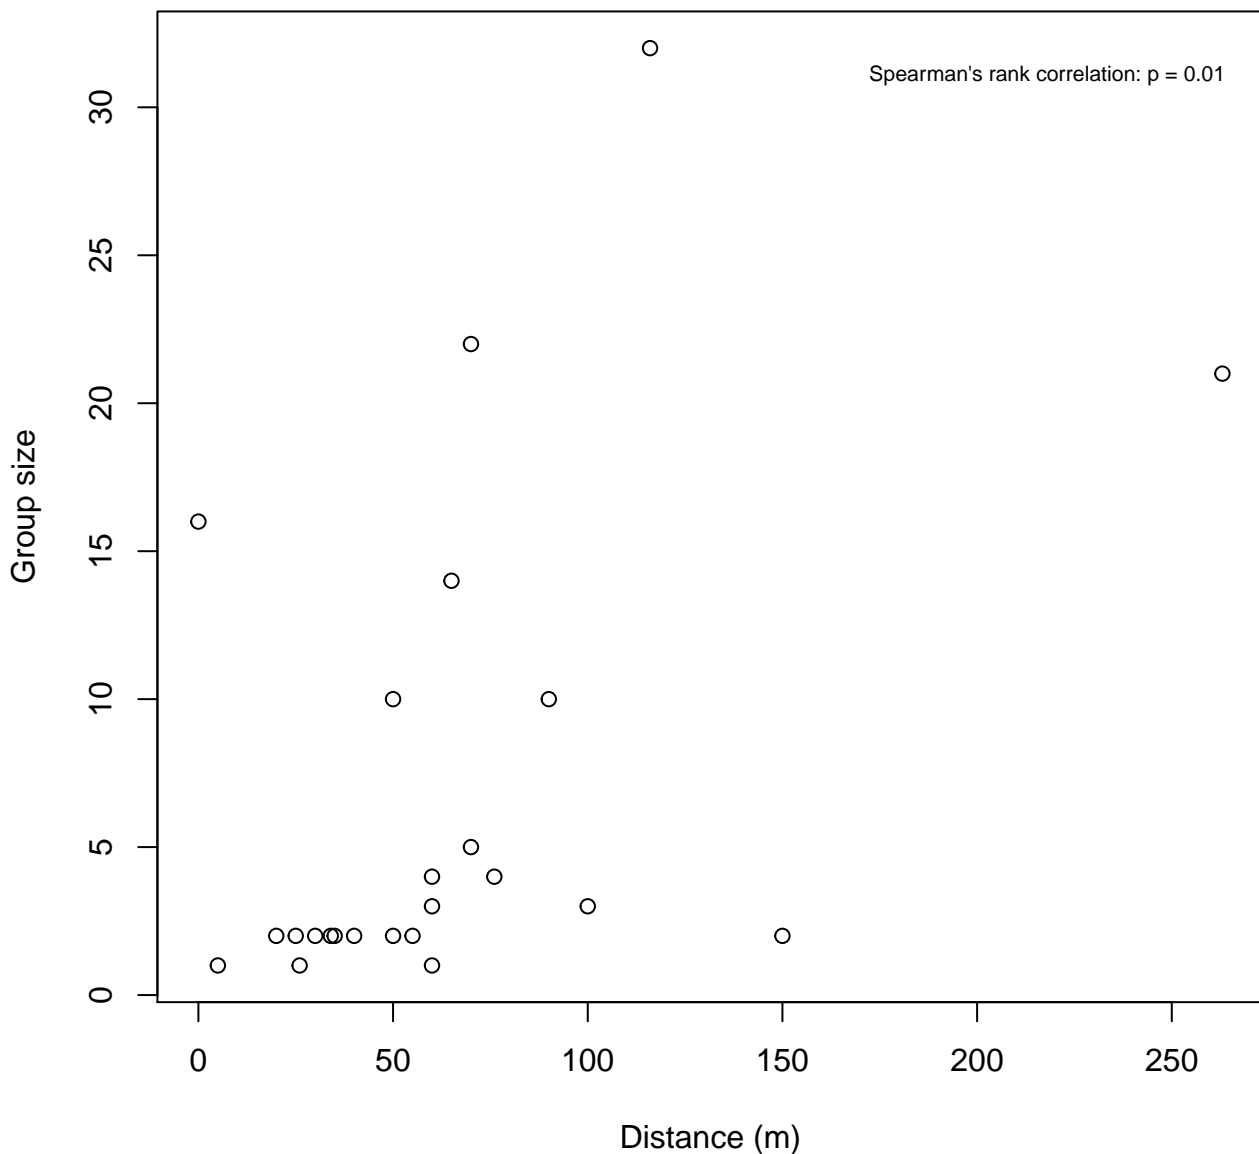

Psittacara leucophthalmus – Peruvian Yungas – Peru (N = 24, key function = hn)

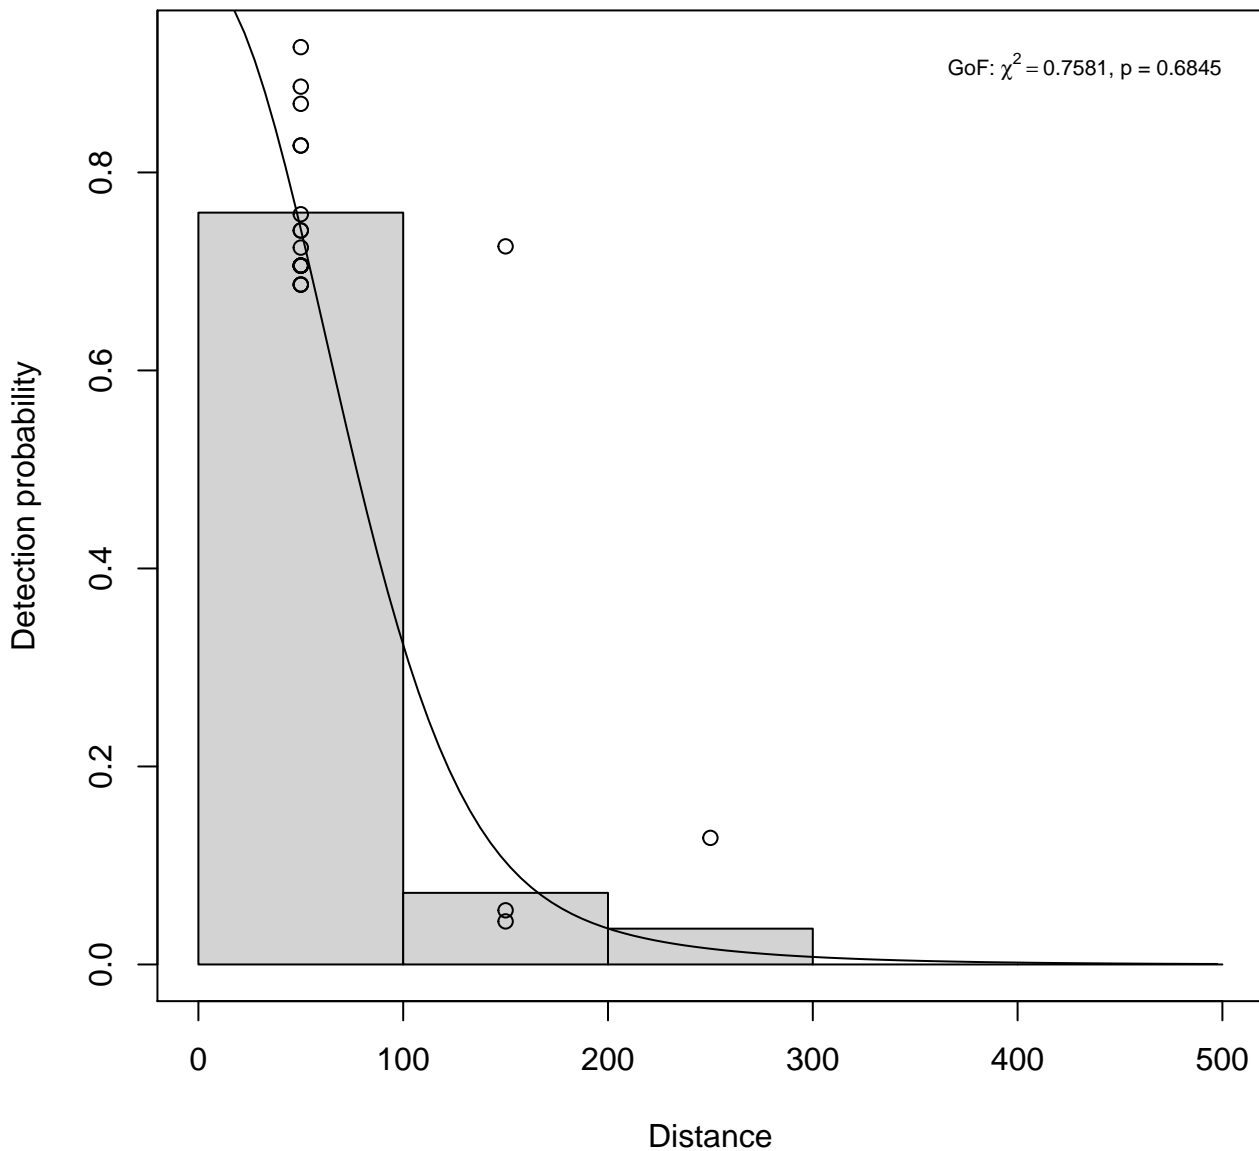

Psittacara leucophthalmus – Peruvian Yungas – Peru (N = 24, key function = hn)

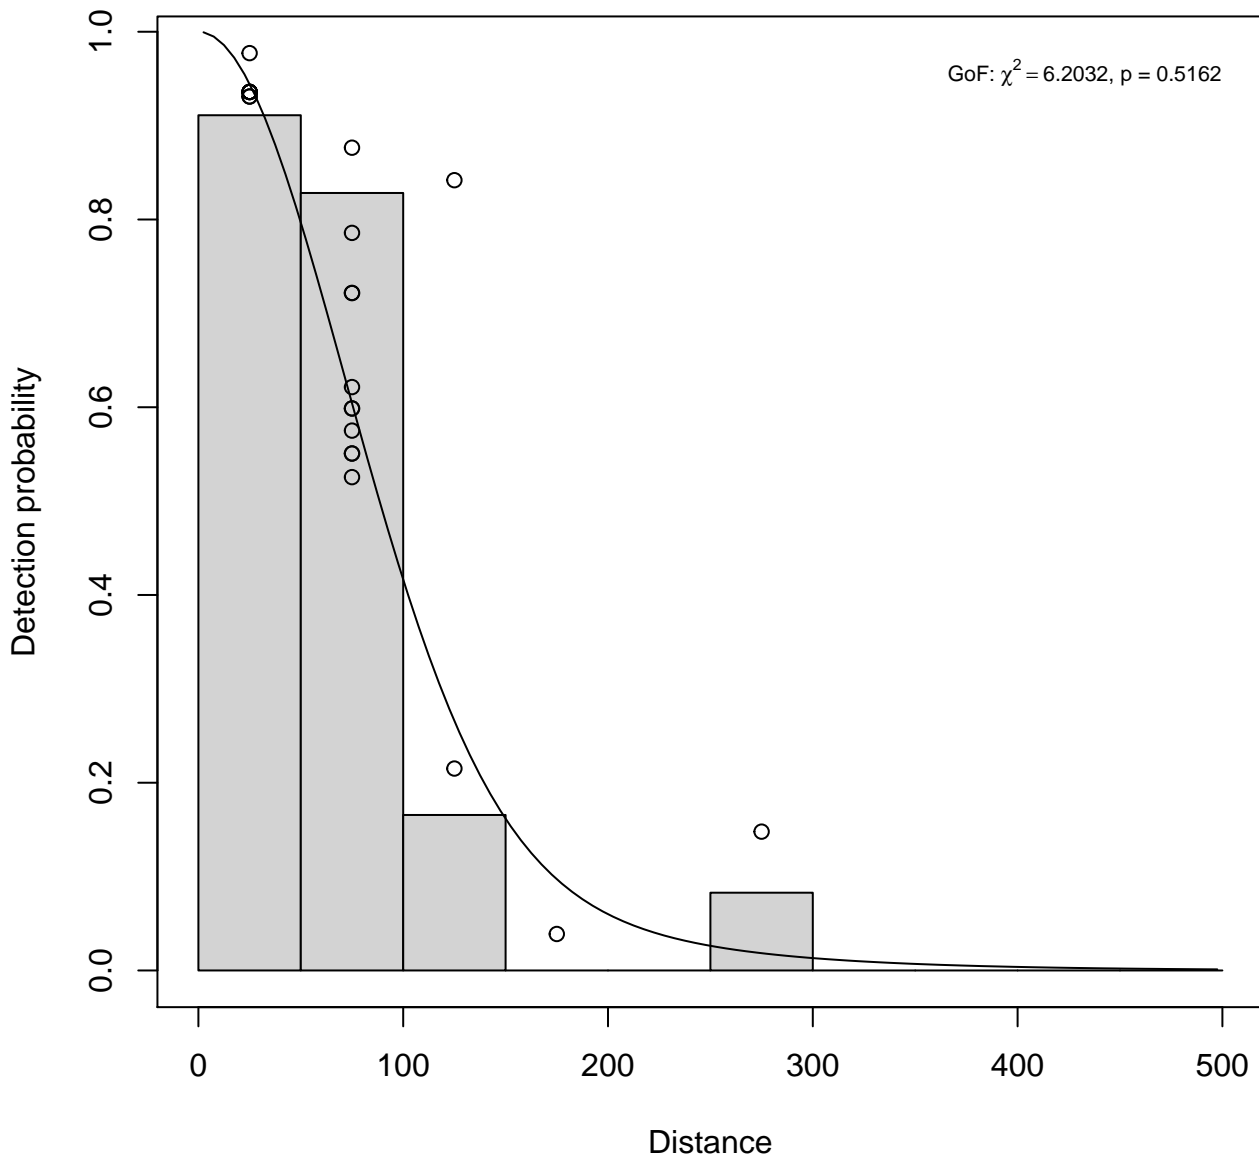

Psittacara leucophthalmus – Peruvian Yungas – Peru (N = 24, key function = hn)

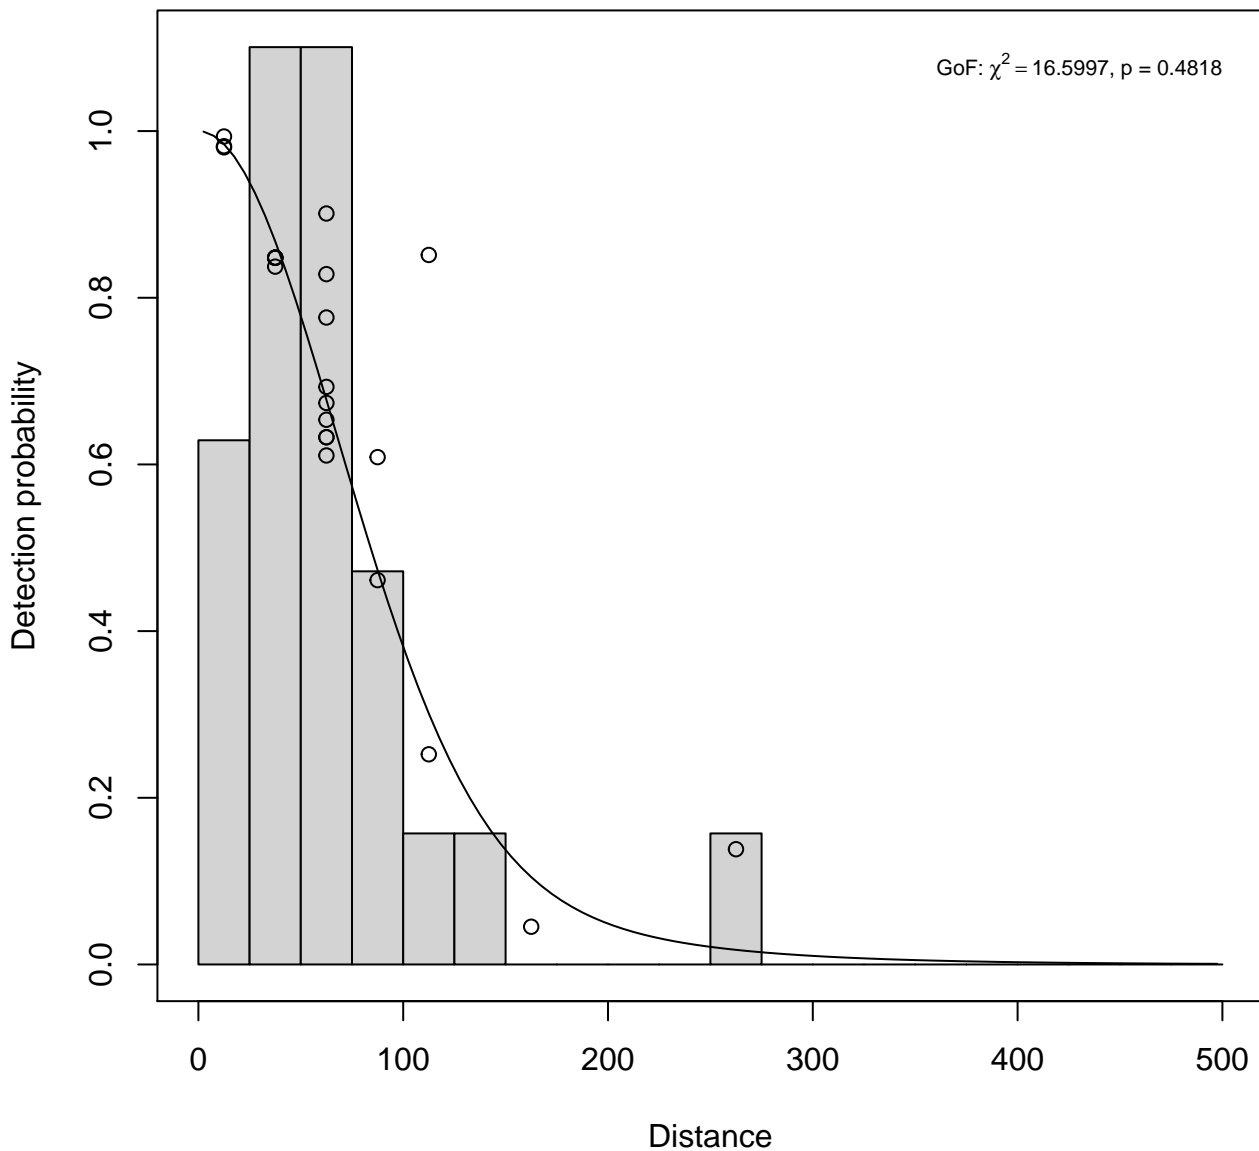

Supplement: s1 [file s1]
