# Supplementary material
Source: MDPI journal article supplement (https://www.mdpi.com/1424-2818/13/7/300)

# Amazona ochrocephala – Magdalena–Uraba moist forests – Colombia

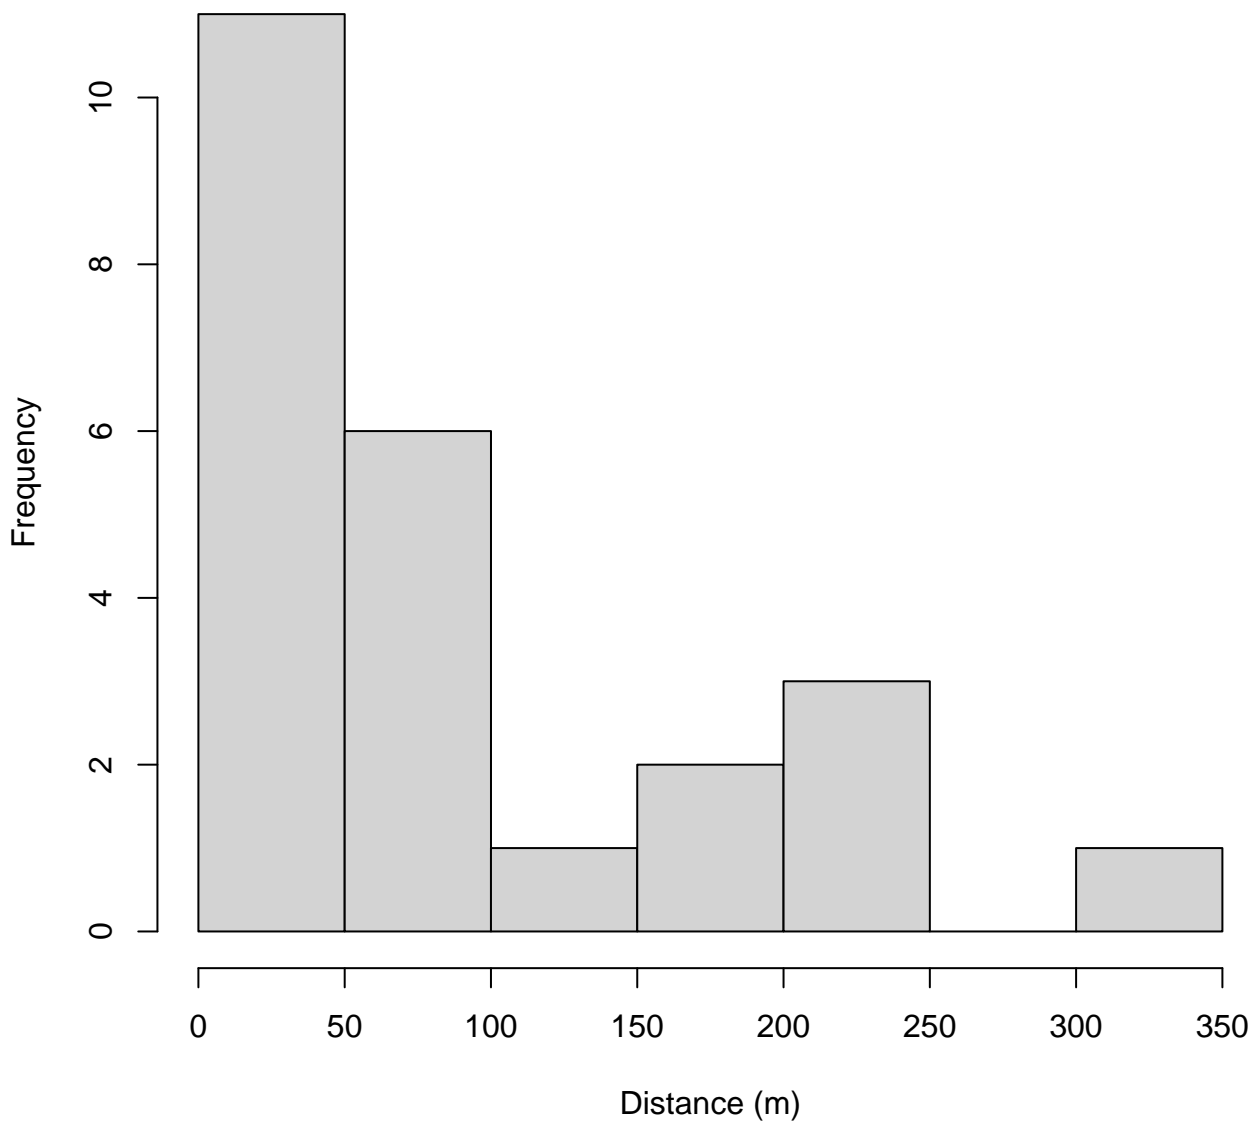

# Amazona ochrocephala – Magdalena–Uraba moist forests – Colombia

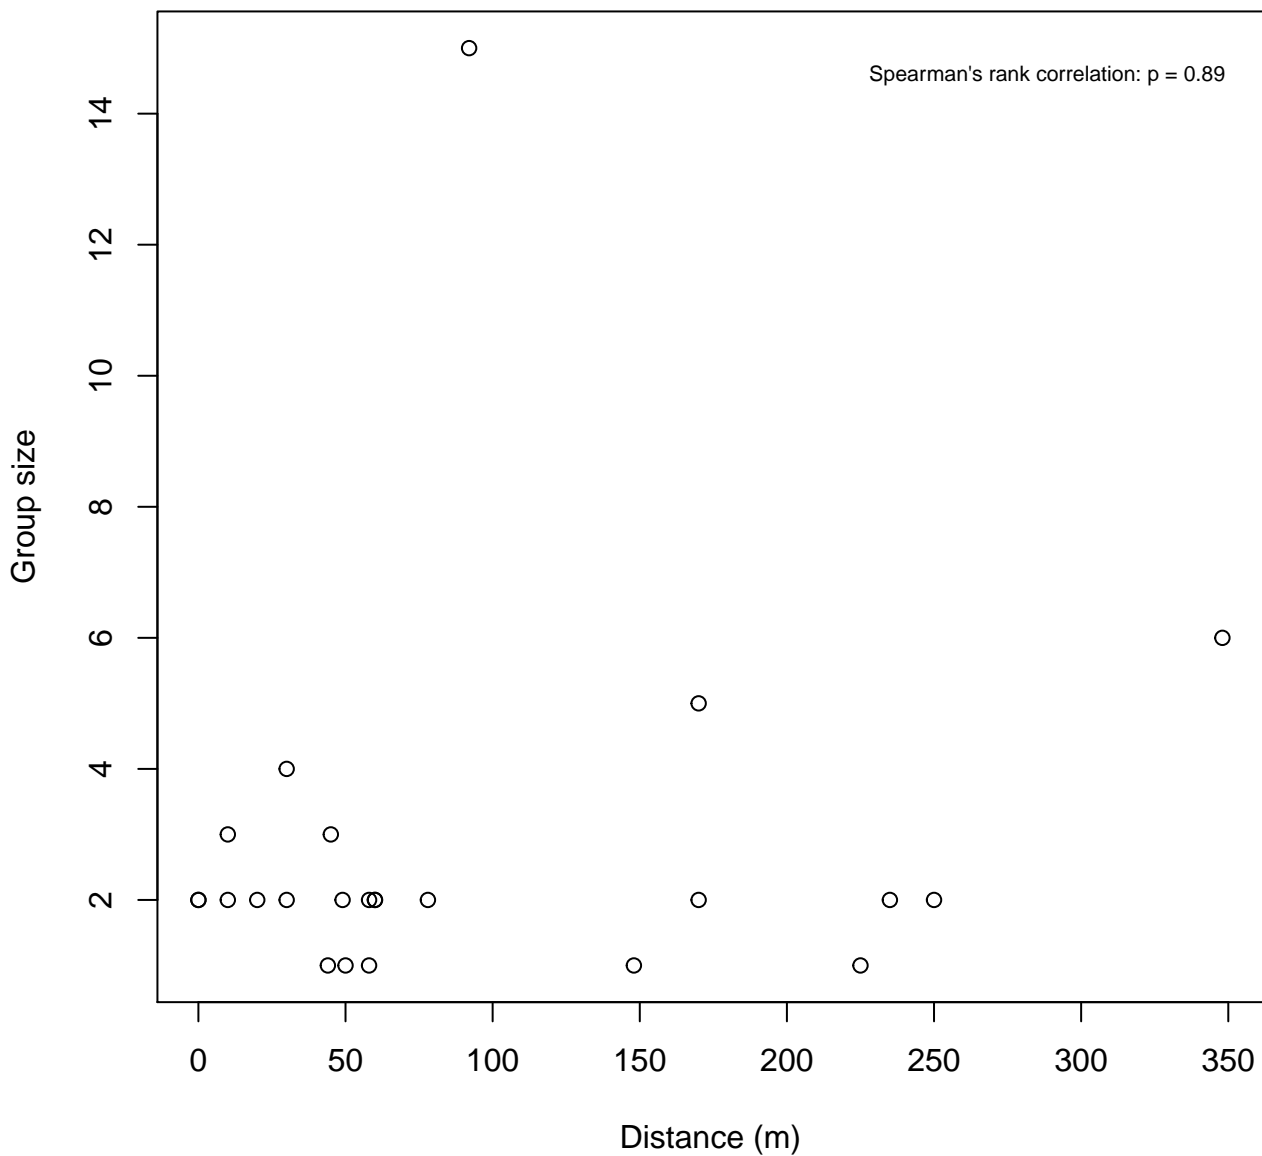

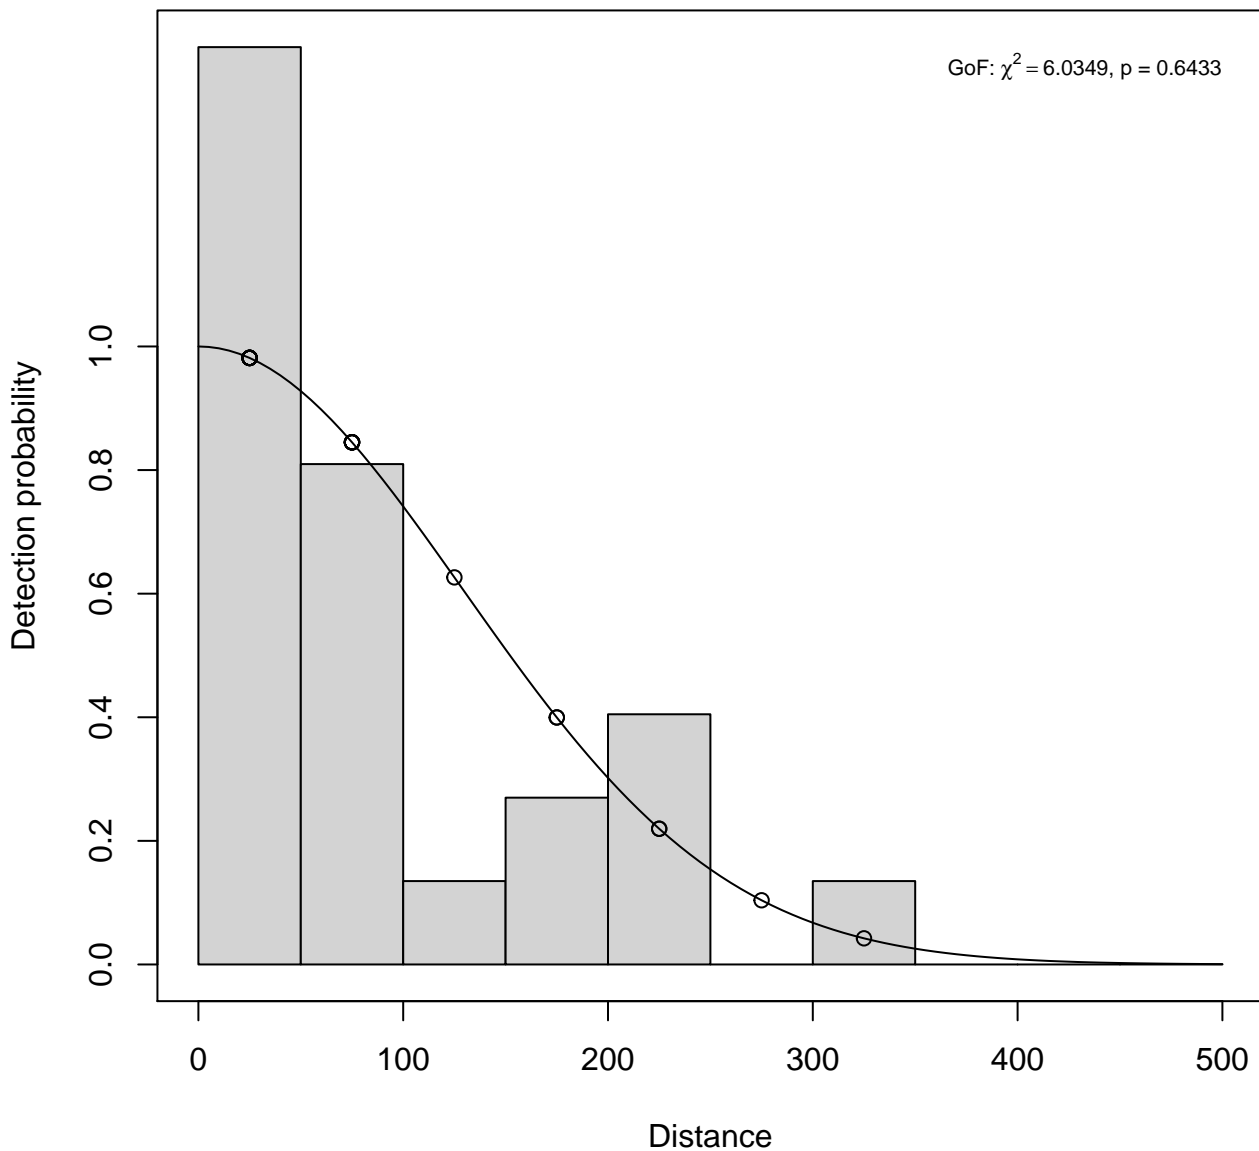

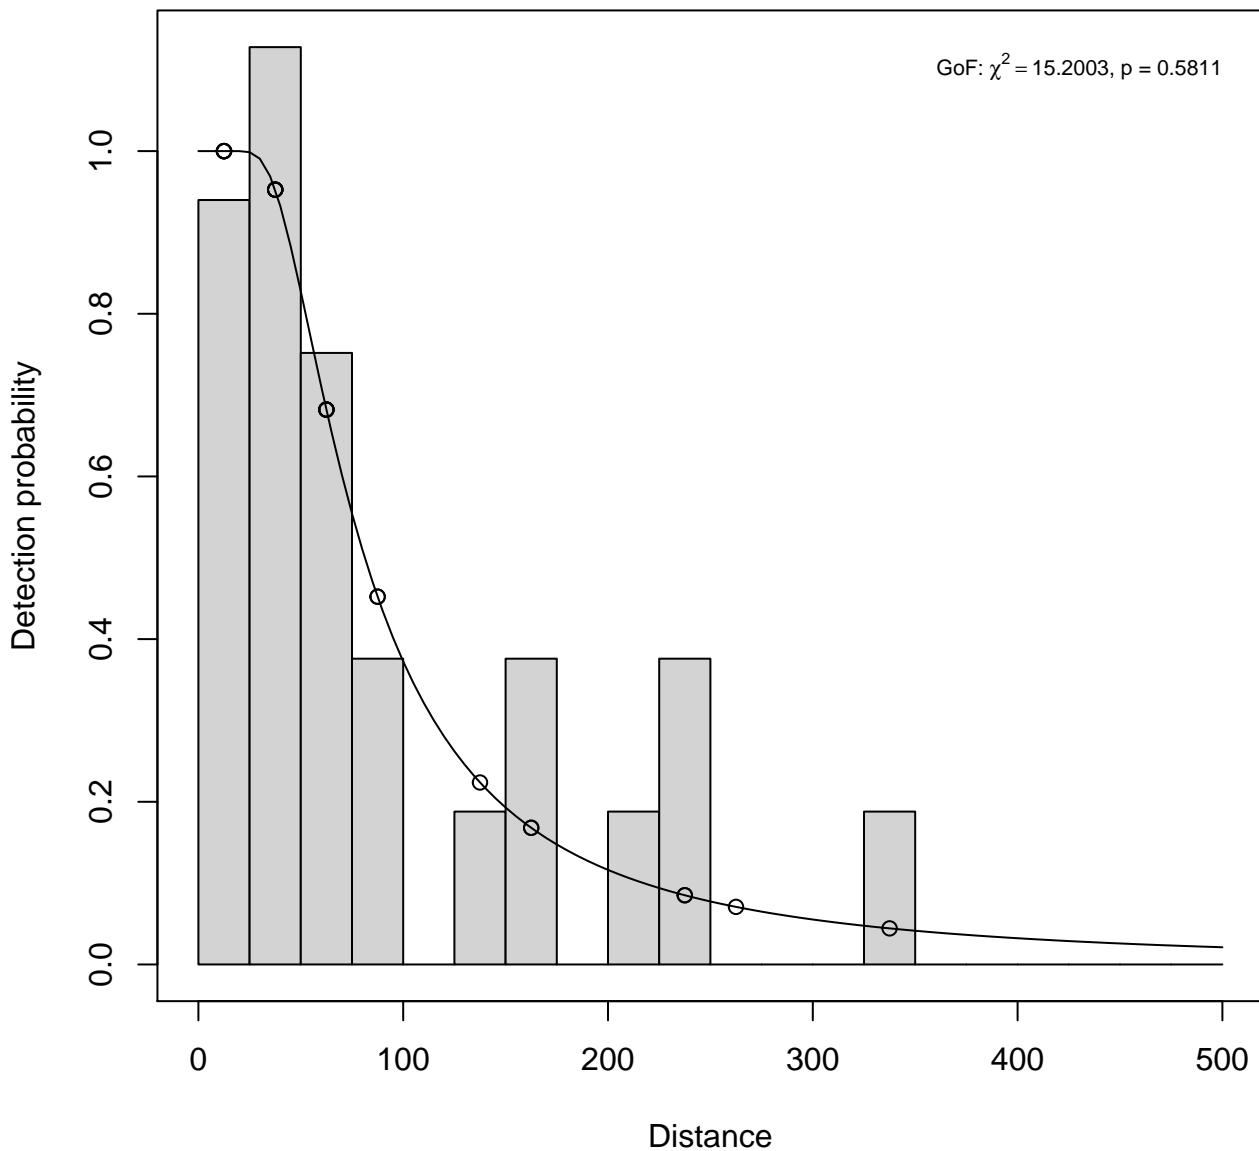

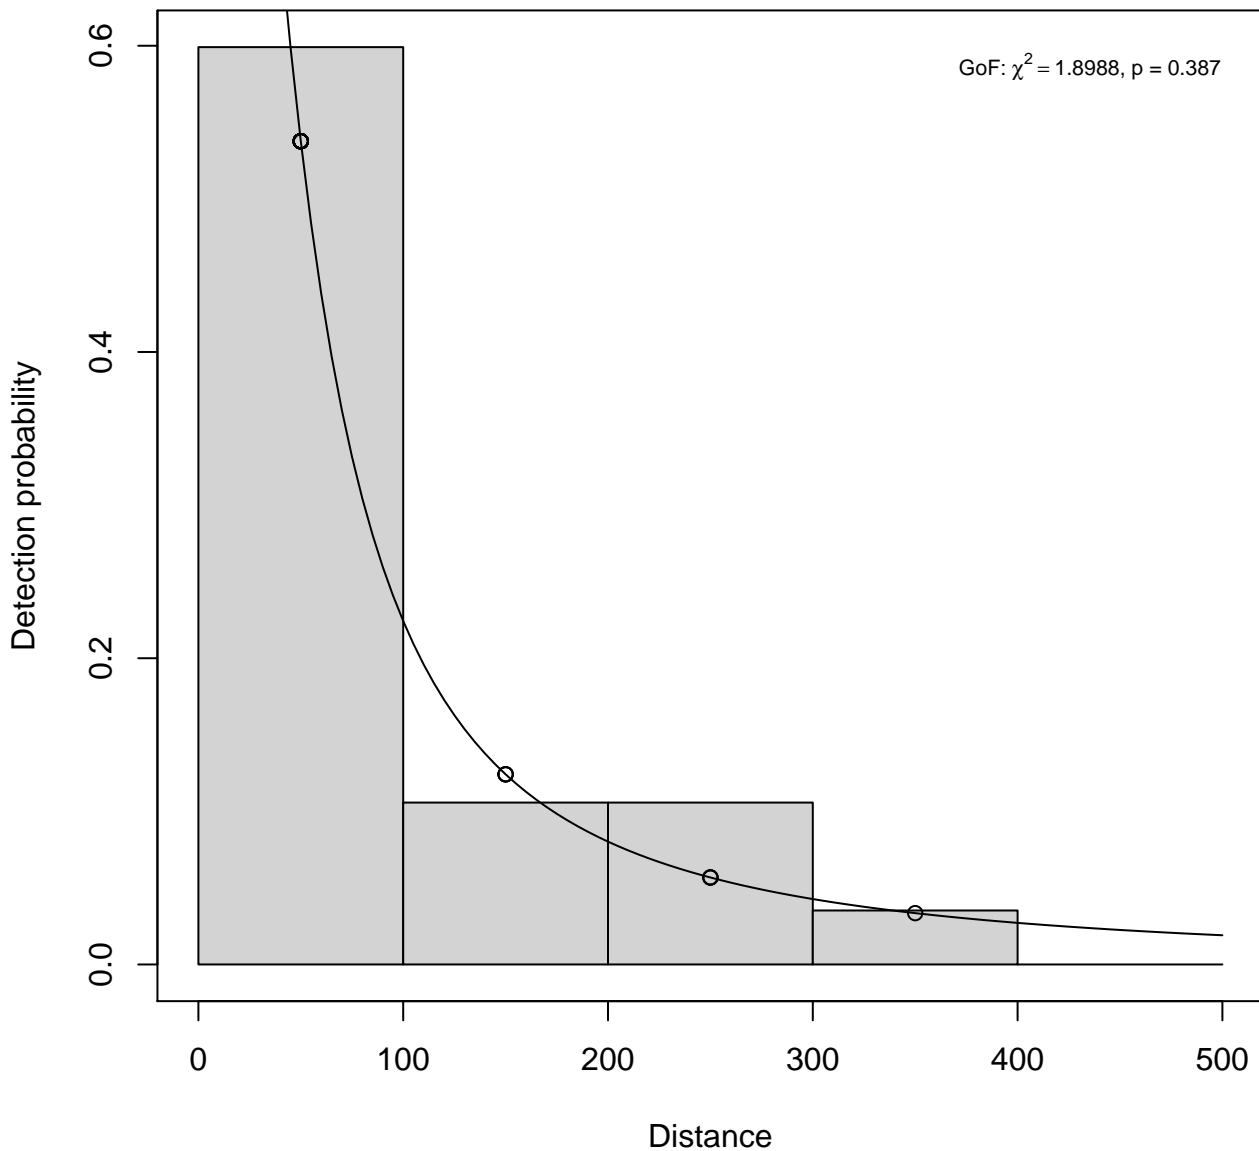

Supplement: s1 [file s1]
