# Supplementary material
Source: MDPI journal article supplement (https://www.mdpi.com/1424-2818/13/7/300)

# **Myiopsitta luchi** – Bolivian montane dry forests – Bolivia

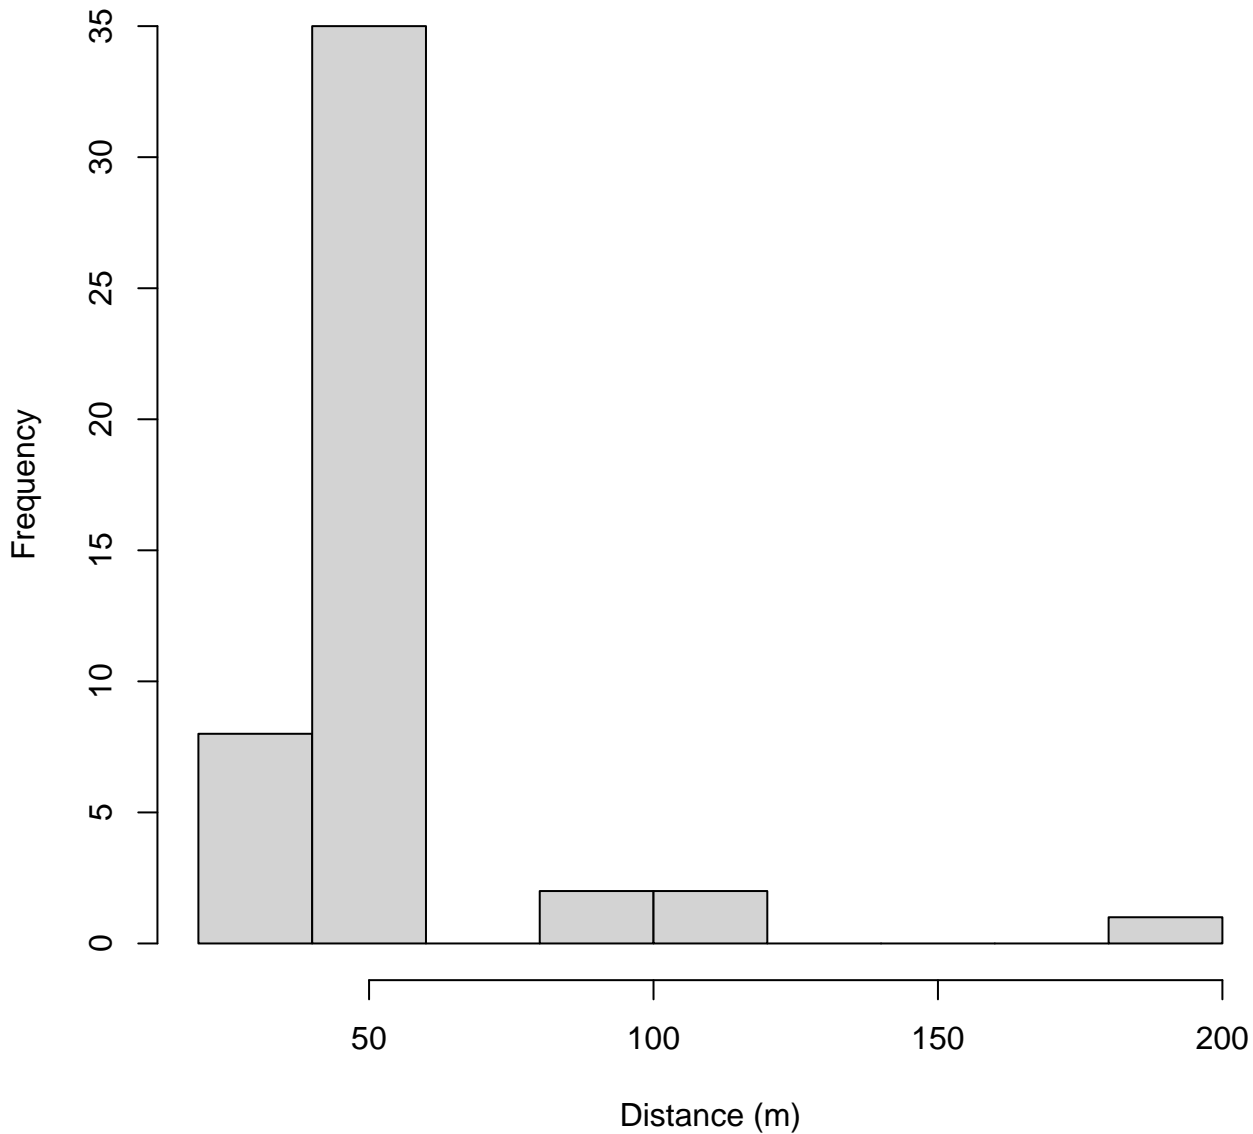

# Myiopsitta luchi – Bolivian montane dry forests – Bolivia

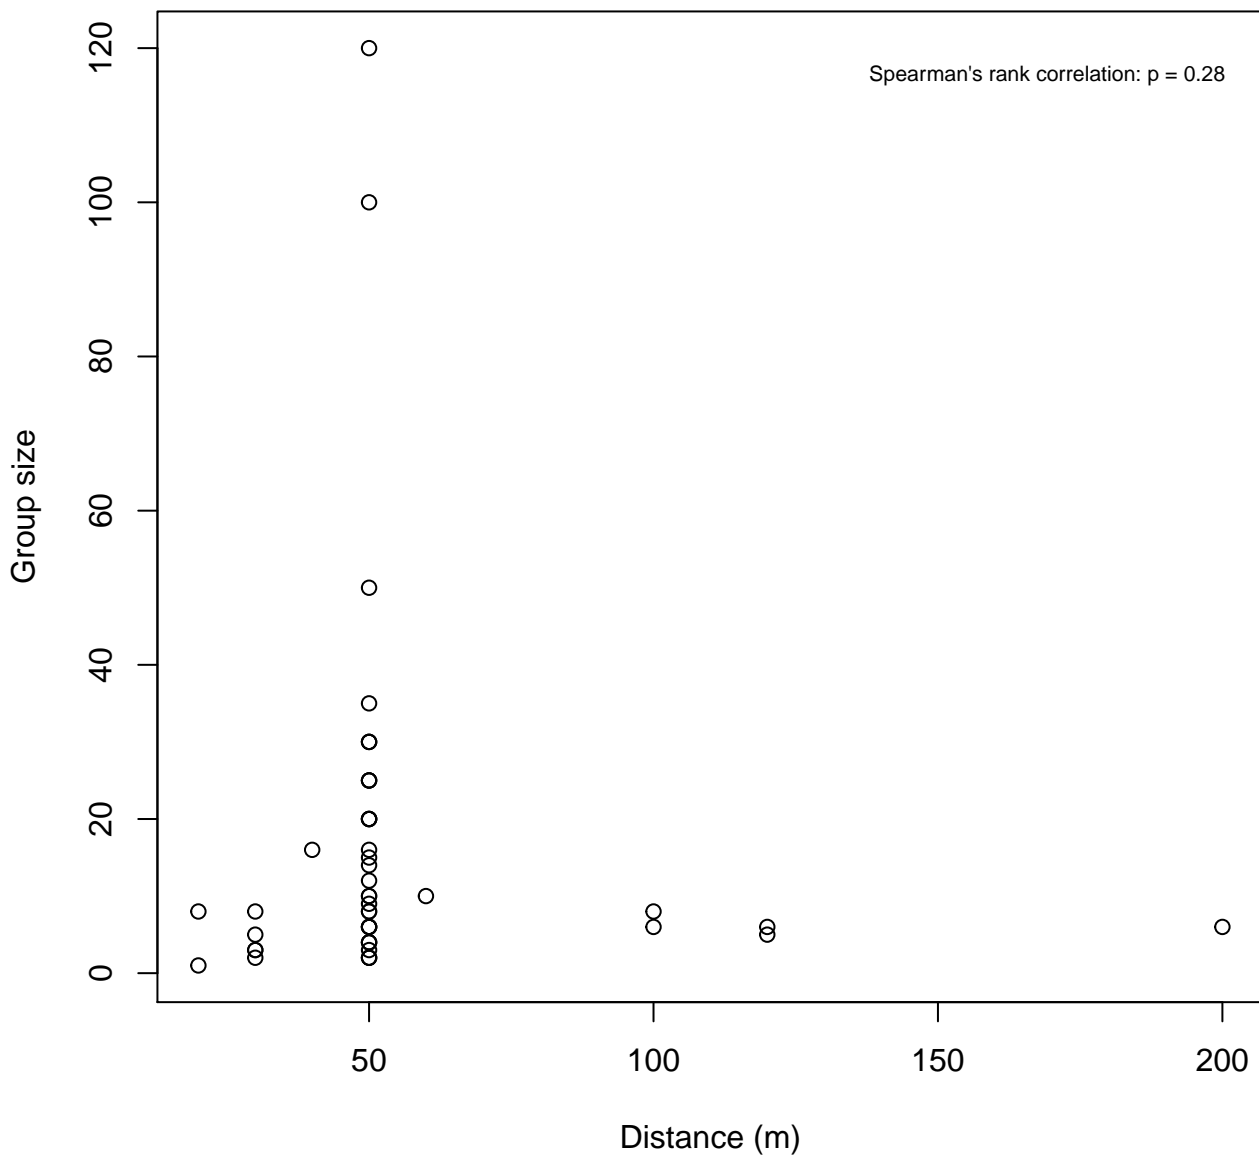

Myiopsitta luchi – Bolivian montane dry forests – Bolivia (N = 48, key function = hr)

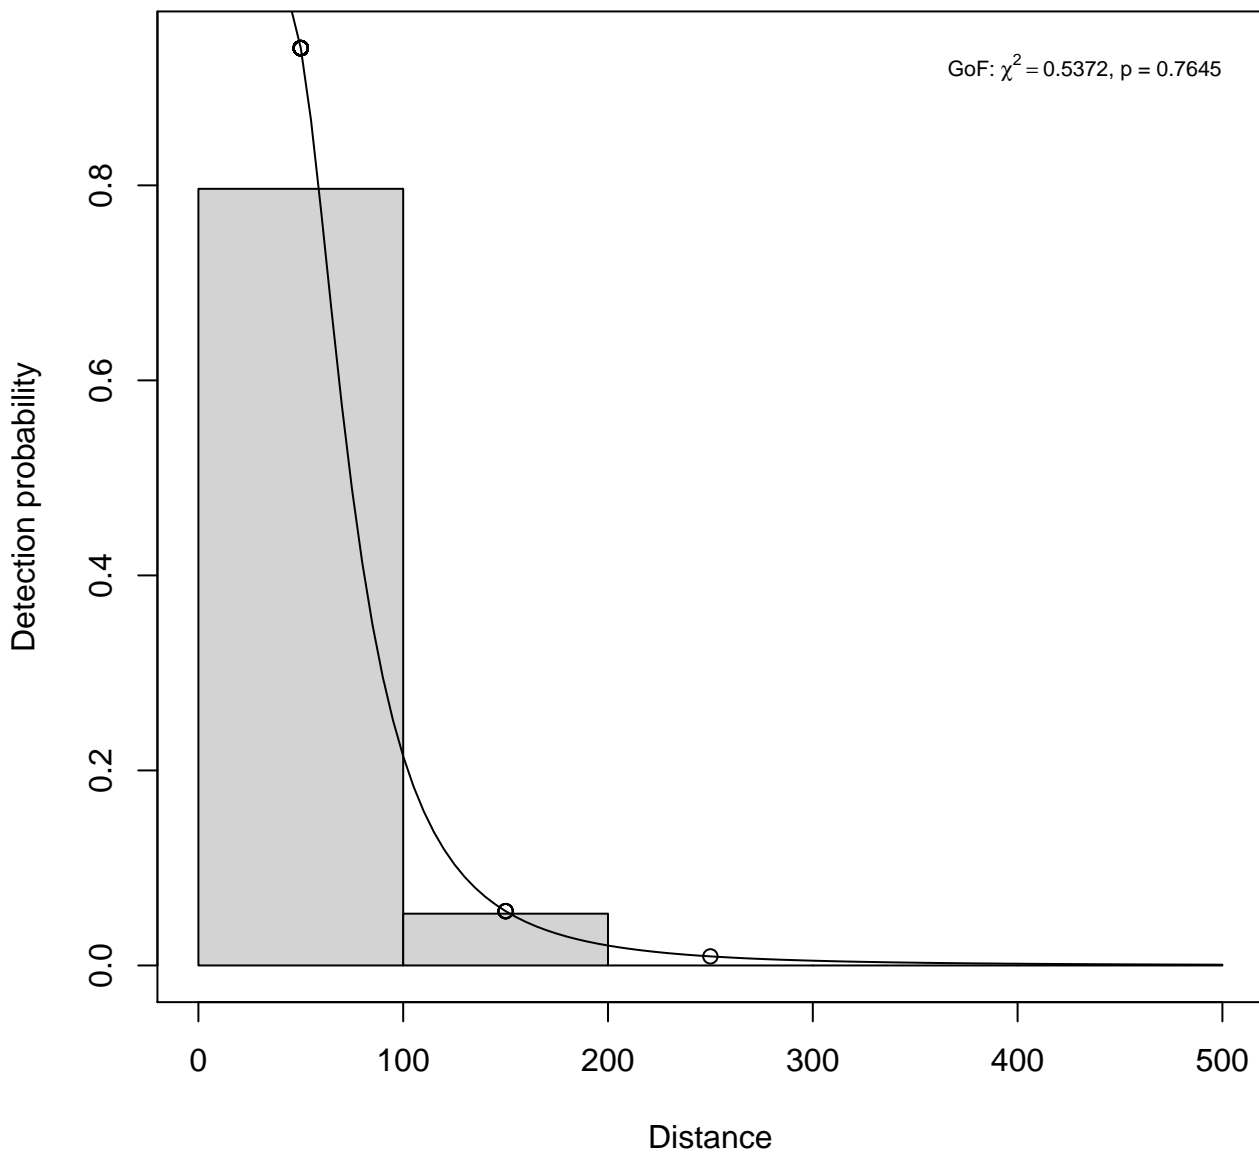

Myiopsitta luchi – Bolivian montane dry forests – Bolivia (N = 48, key function = hr)

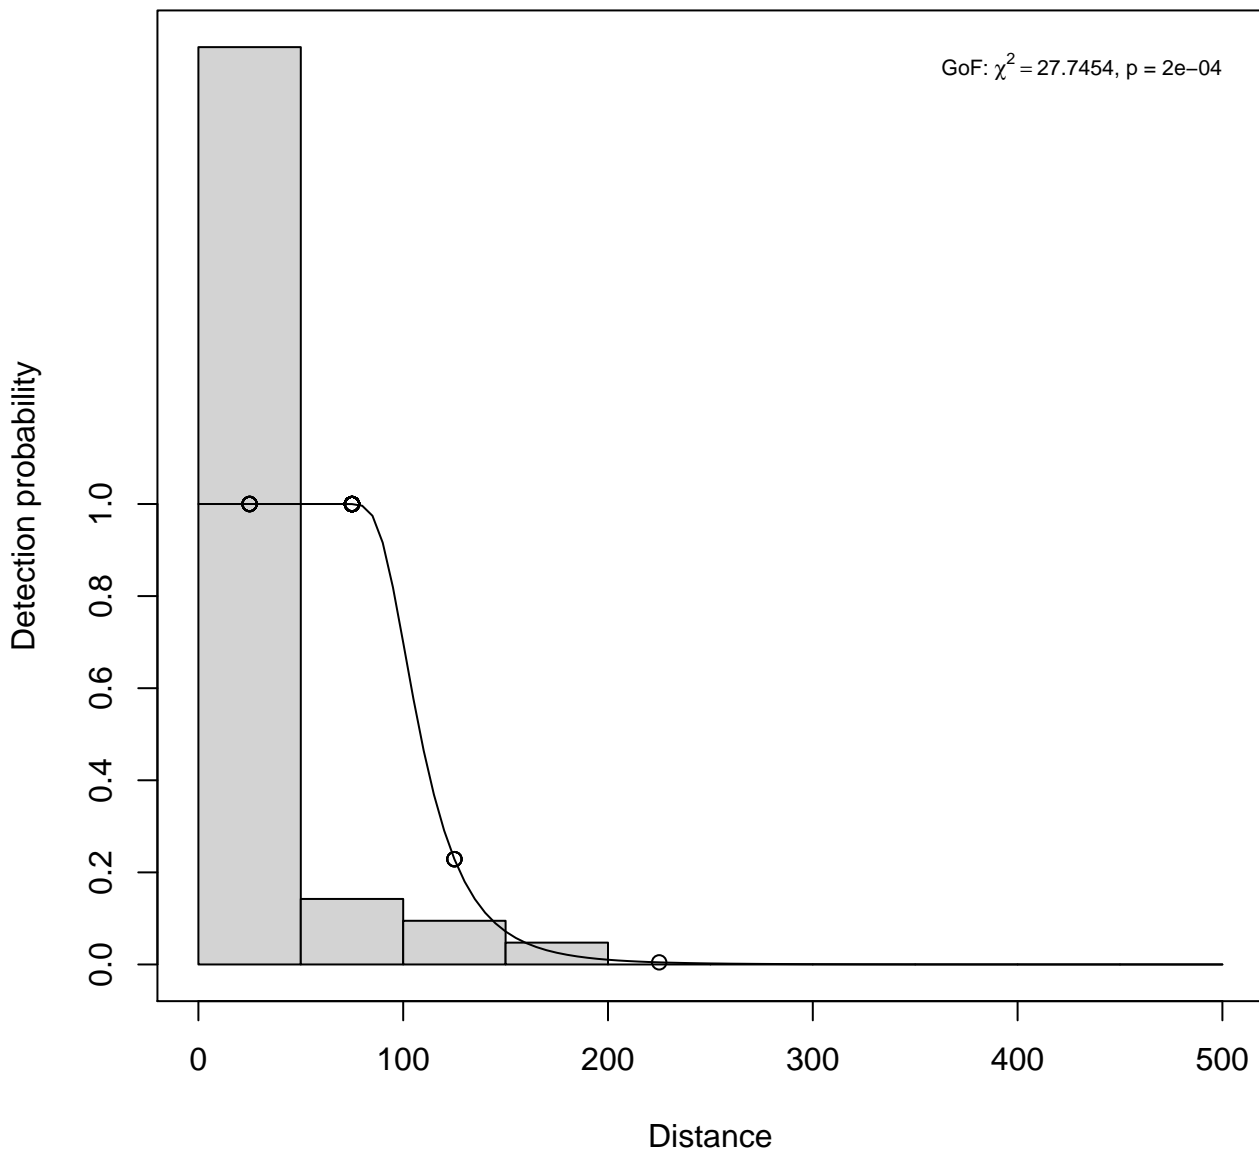

Myiopsitta luchi – Bolivian montane dry forests – Bolivia (N = 48, key function = hr)

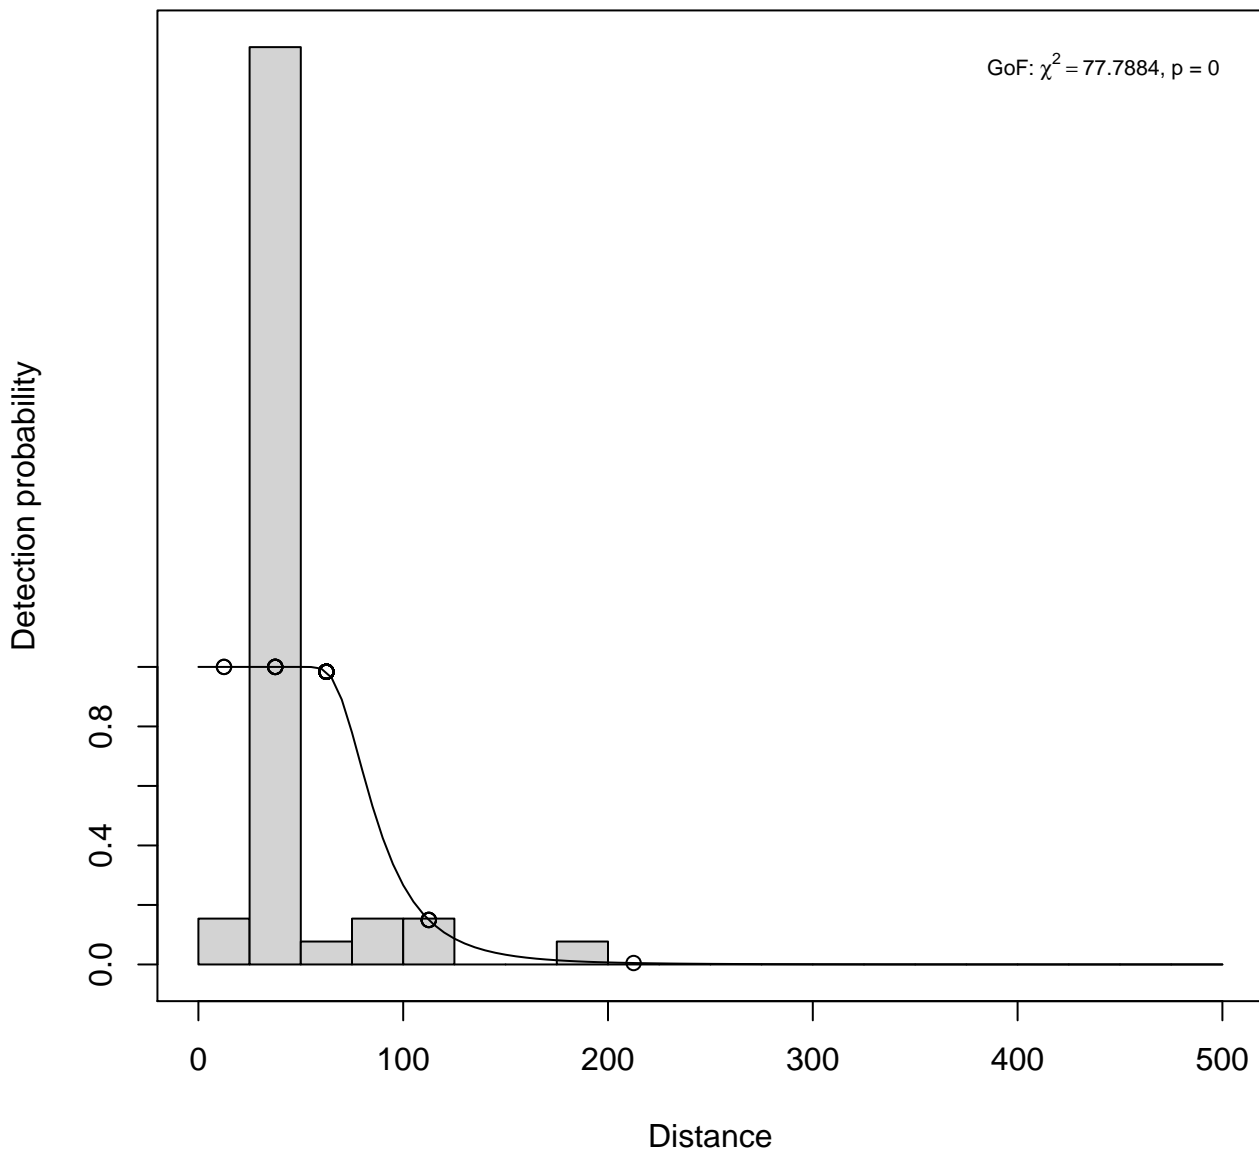

Supplement: s1 [file s1]
