# Supplementary material
Source: MDPI journal article supplement (https://www.mdpi.com/1424-2818/13/7/300)

# **Brotogetis jugularis – Central American dry forests – Costa Rica**

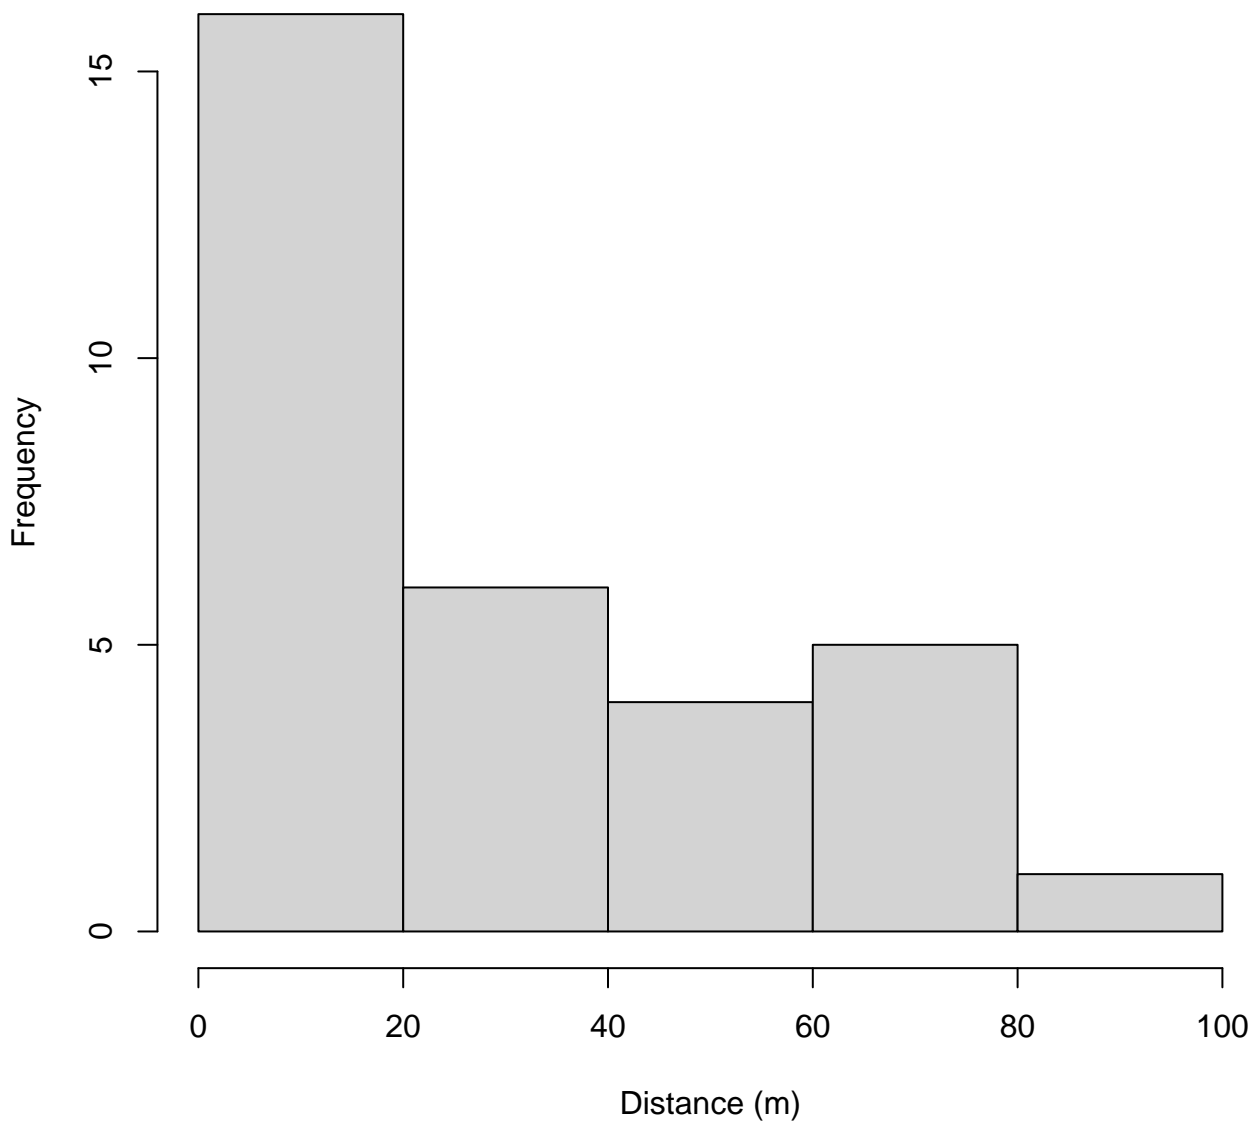

# Brotogetis jugularis – Central American dry forests – Costa Rica

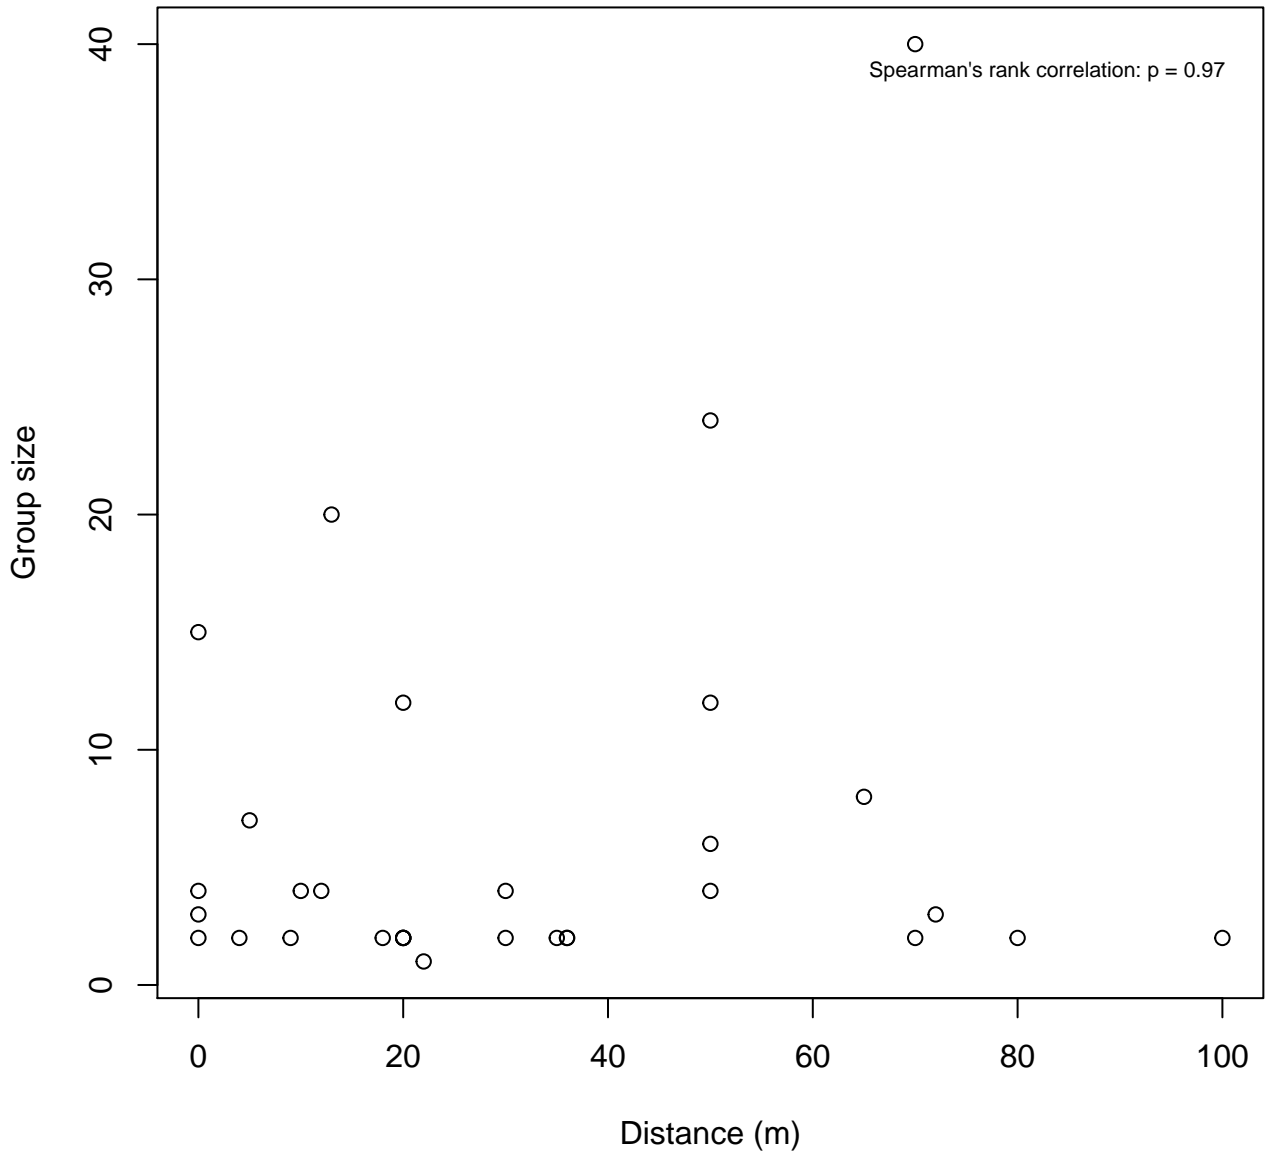

*Brotogetis jugularis* – Central American dry forests – Costa Rica (N = 32, key function = hn)

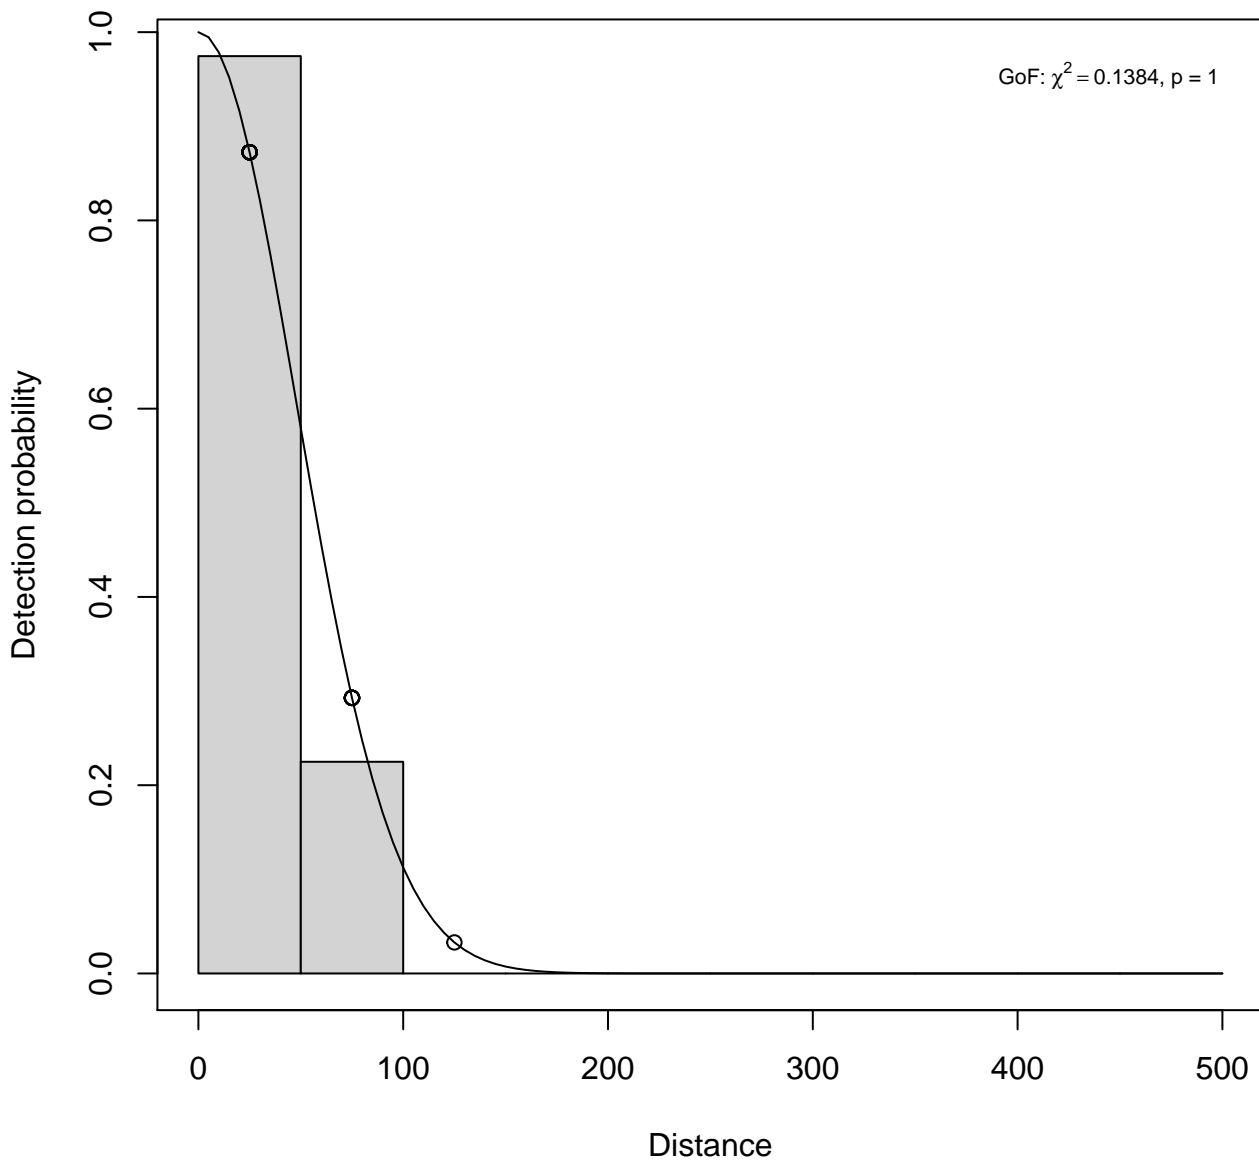

*Brotogetis jugularis* – Central American dry forests – Costa Rica (N = 32, key function = hn)

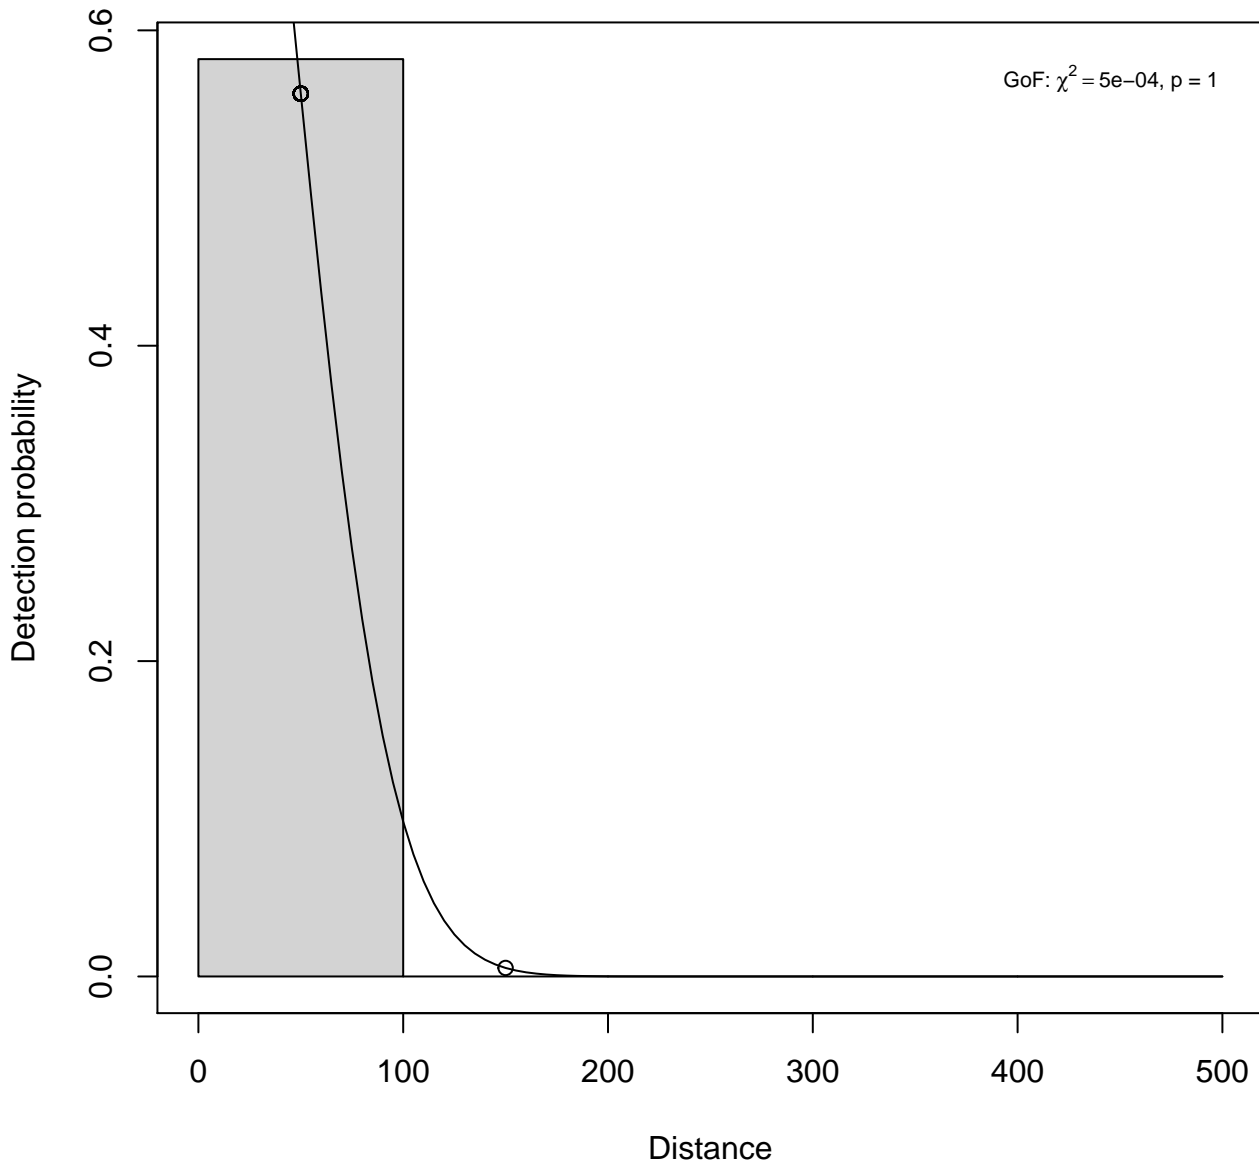

Brotogetis jugularis – Central American dry forests – Costa Rica (N = 32, key function = hn)

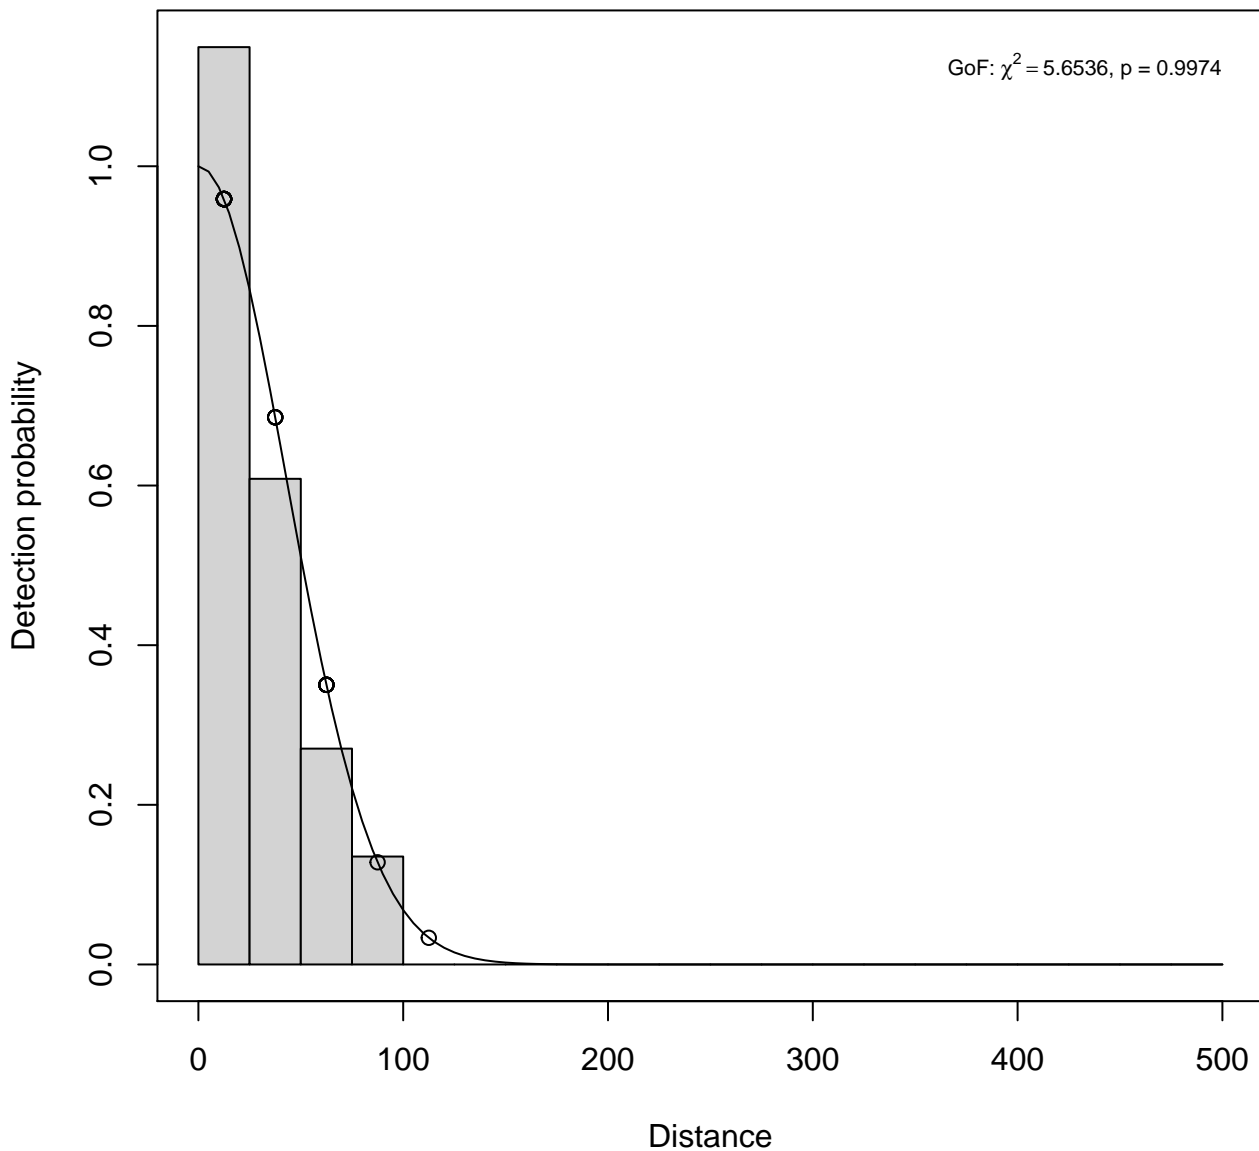

Supplement: s1 [file s1]
