# Supplementary material
Source: MDPI journal article supplement (https://www.mdpi.com/1424-2818/13/7/300)

# **Eupsittula canicularis – Central American dry forests – Costa Rica**

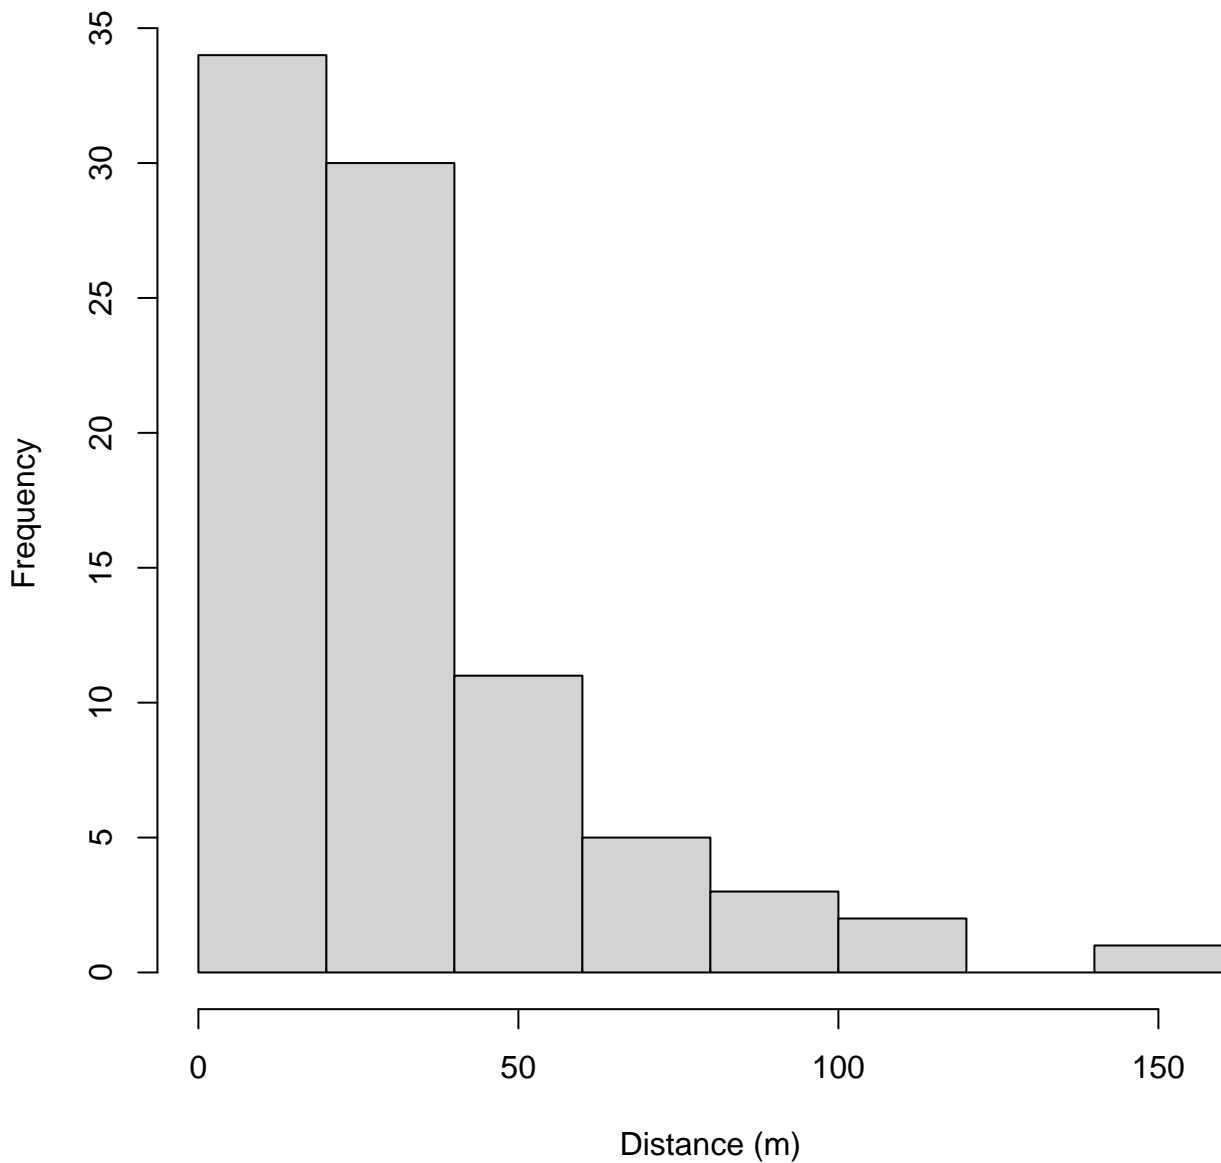

# Eupsittula canicularis – Central American dry forests – Costa Rica

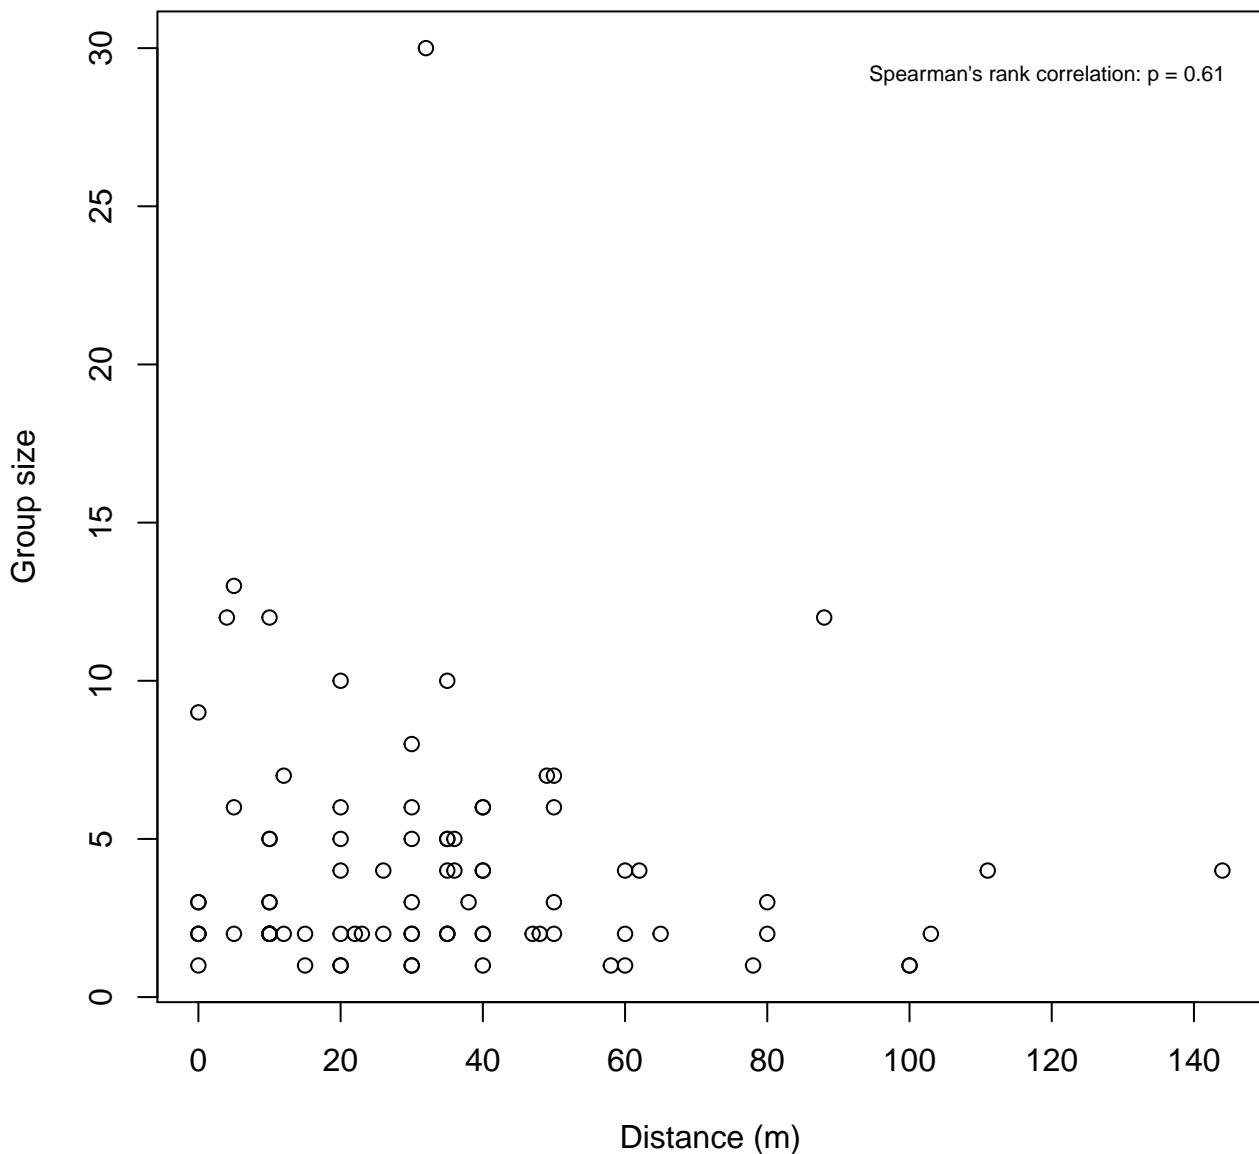

*Eupsittula canicularis* – Central American dry forests – Costa Rica (N = 86, key function = hn)

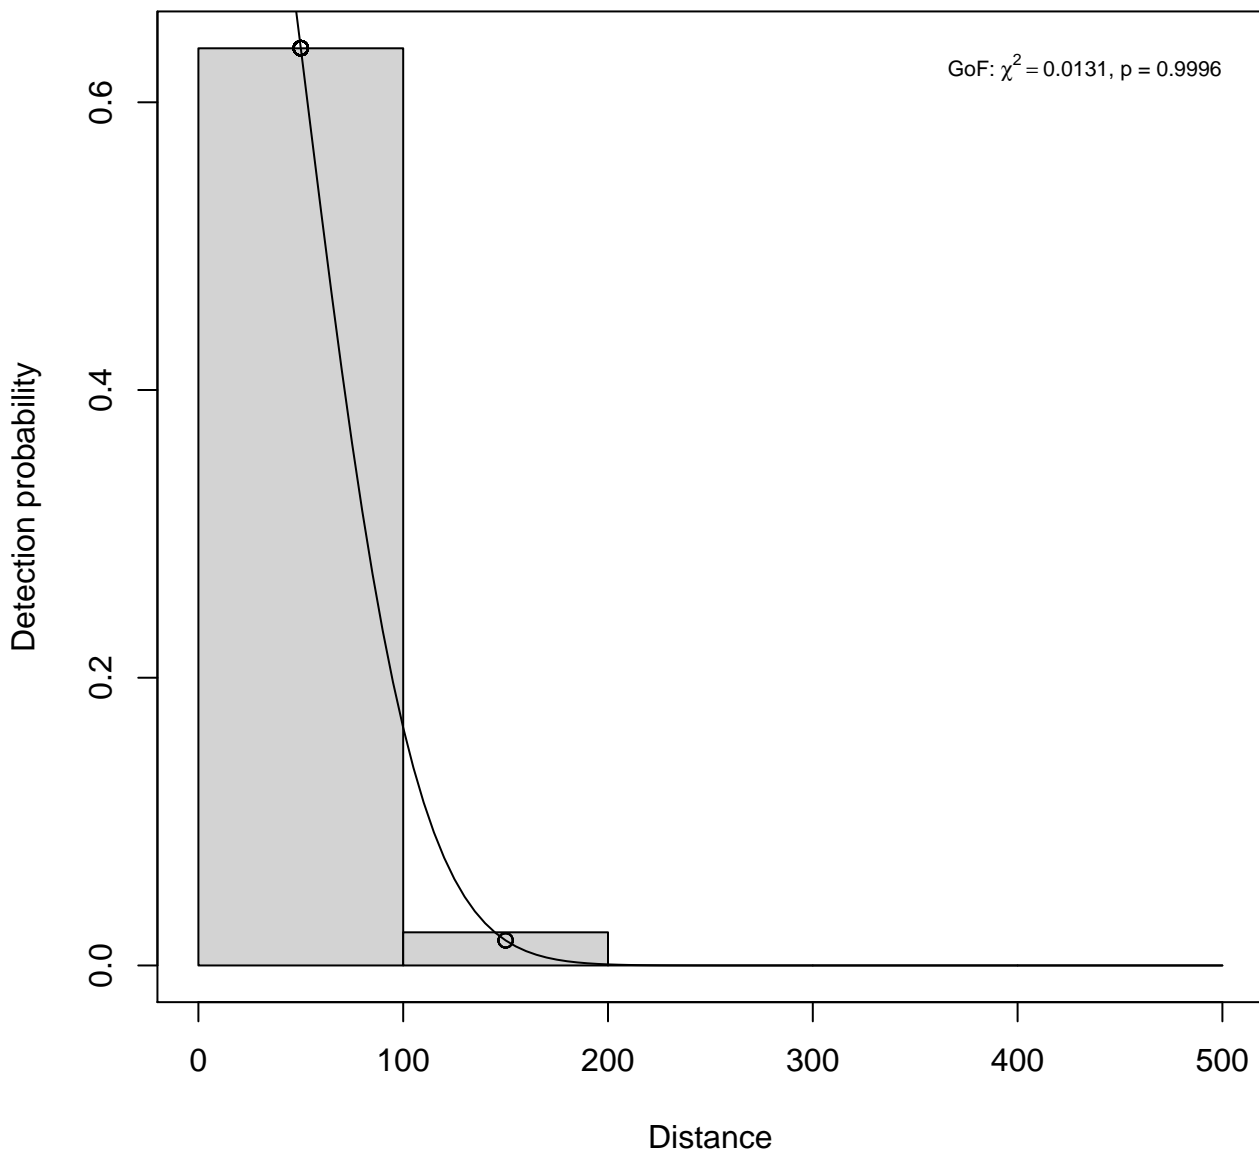

*Eupsittula canicularis* – Central American dry forests – Costa Rica (N = 86, key function = hn)

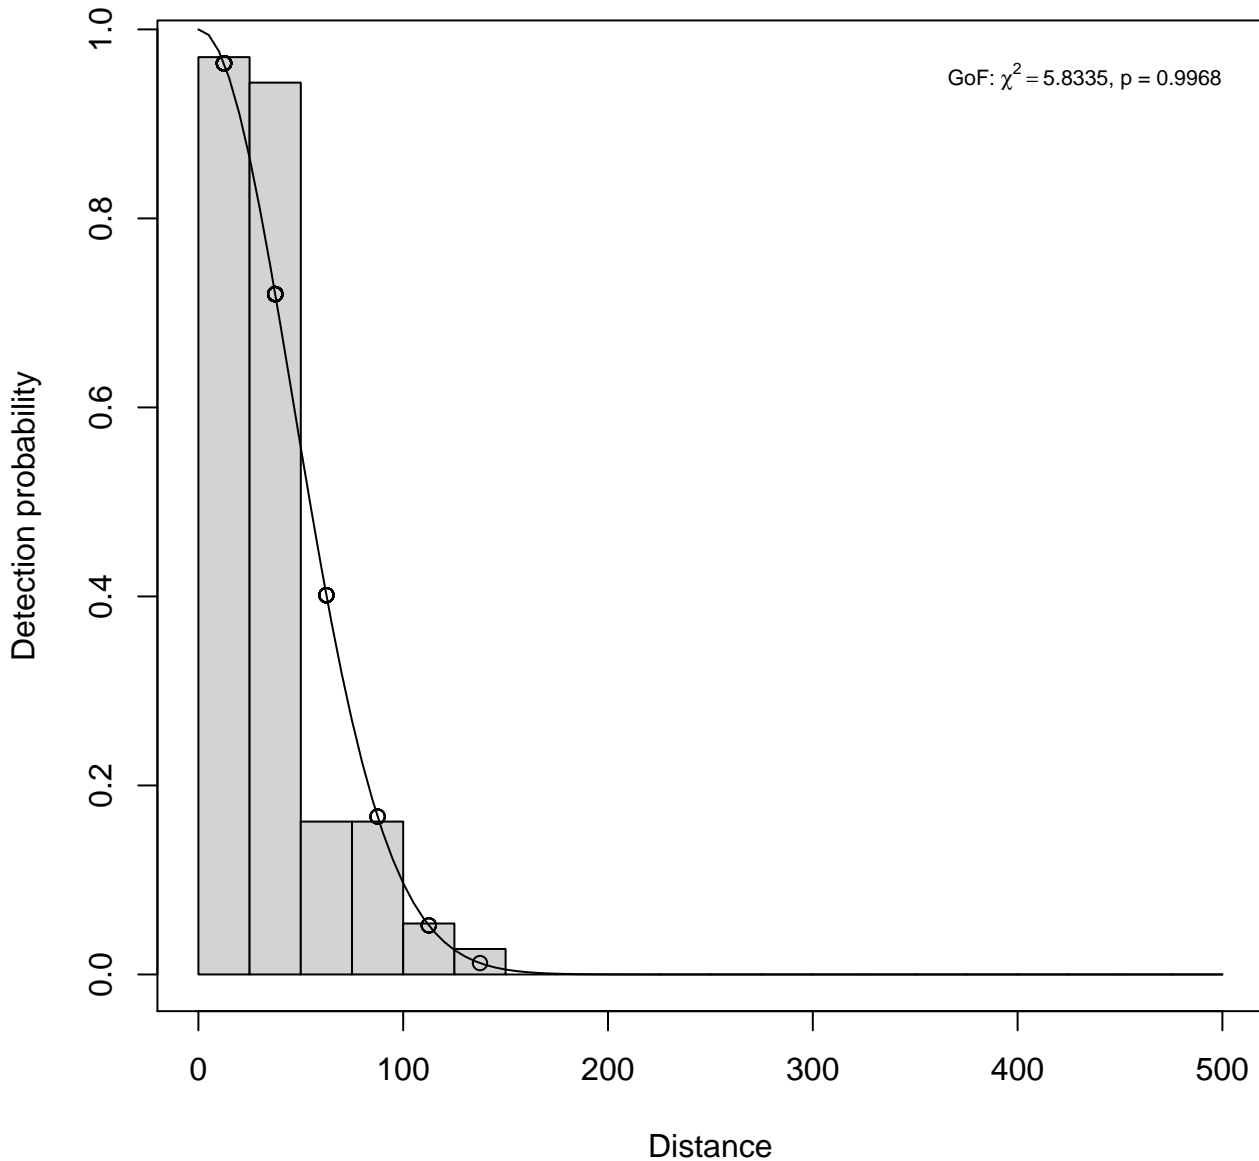

Eupsittula canicularis – Central American dry forests – Costa Rica (N = 86, key function = hn)

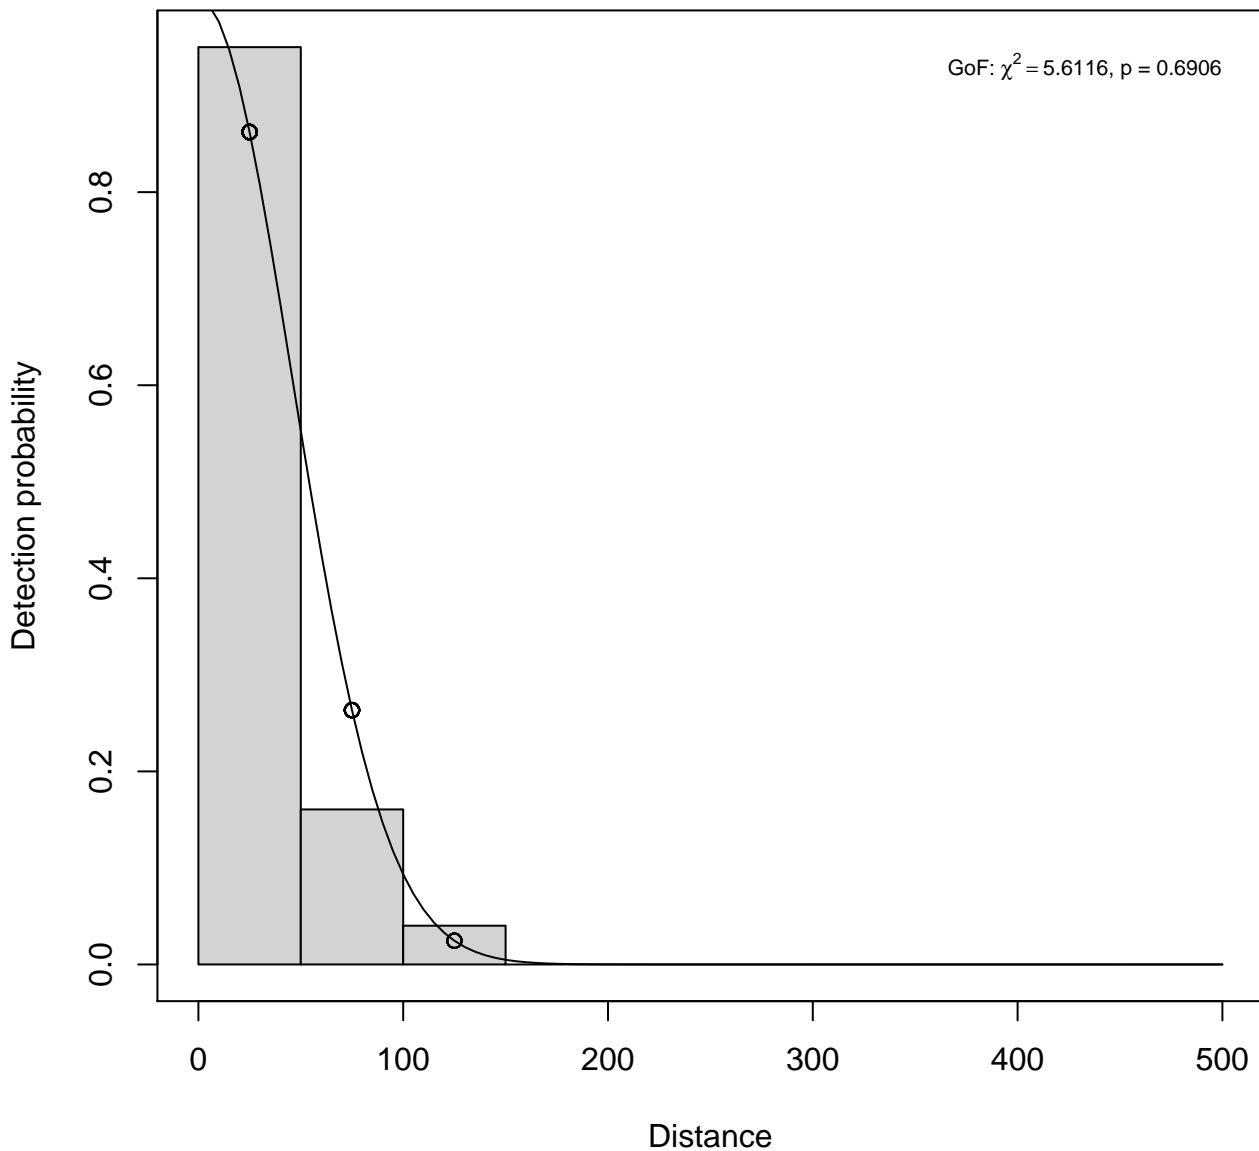

Supplement: s1 [file s1]
