# Supplementary material
Source: MDPI journal article supplement (https://www.mdpi.com/1424-2818/13/7/300)

# **Psittacara leucophthalmus – Mato Grosso tropical dry forests – Brazil**

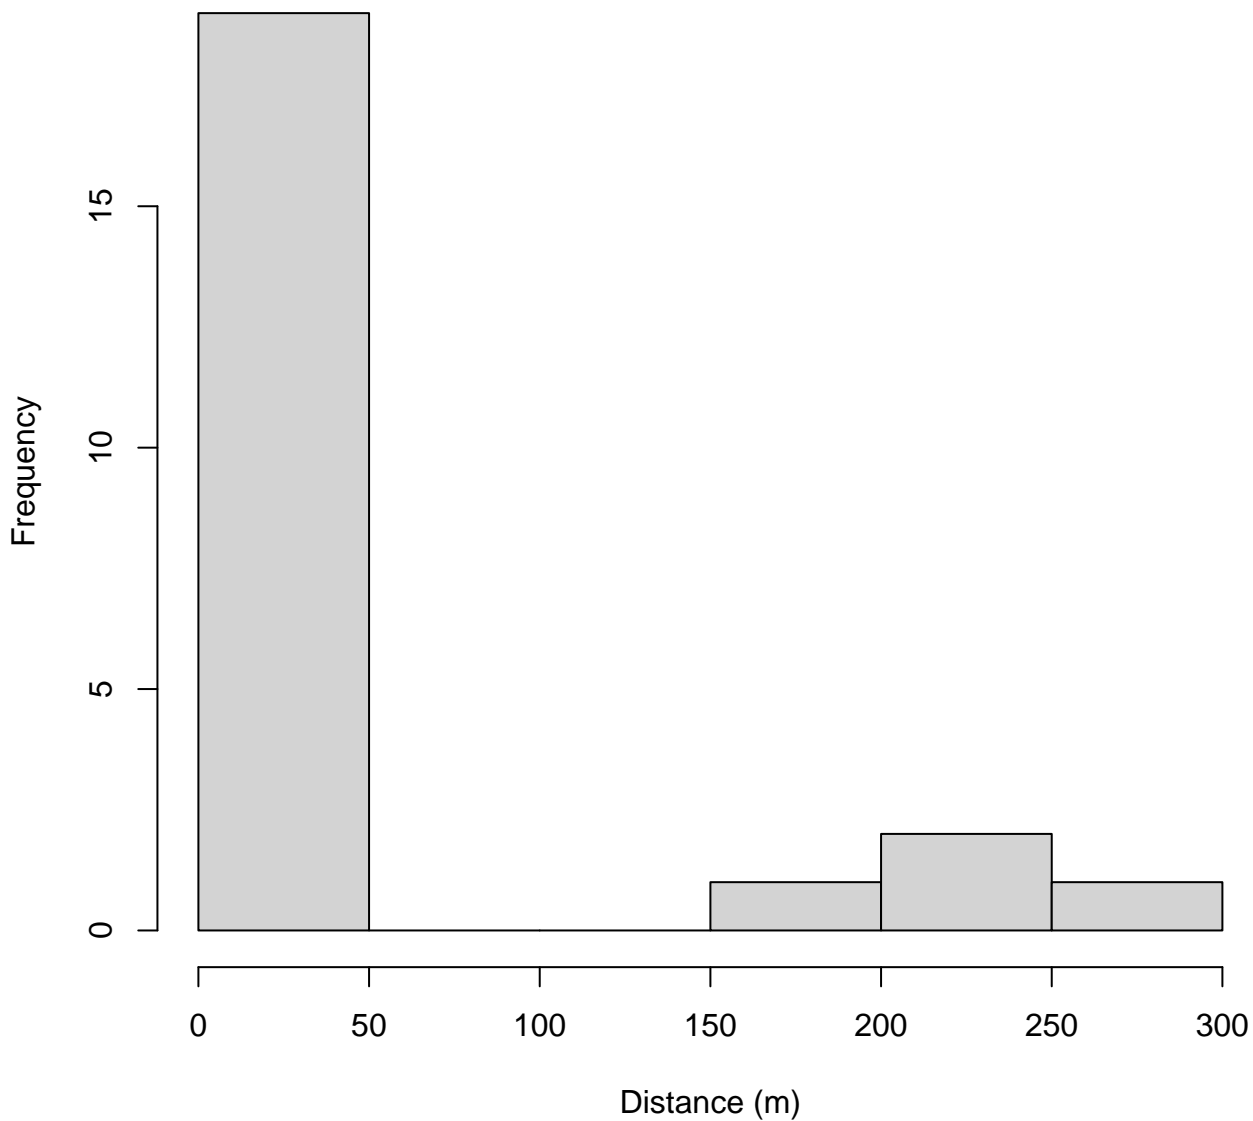

# **Psittacara leucophthalmus – Mato Grosso tropical dry forests – Brazil**

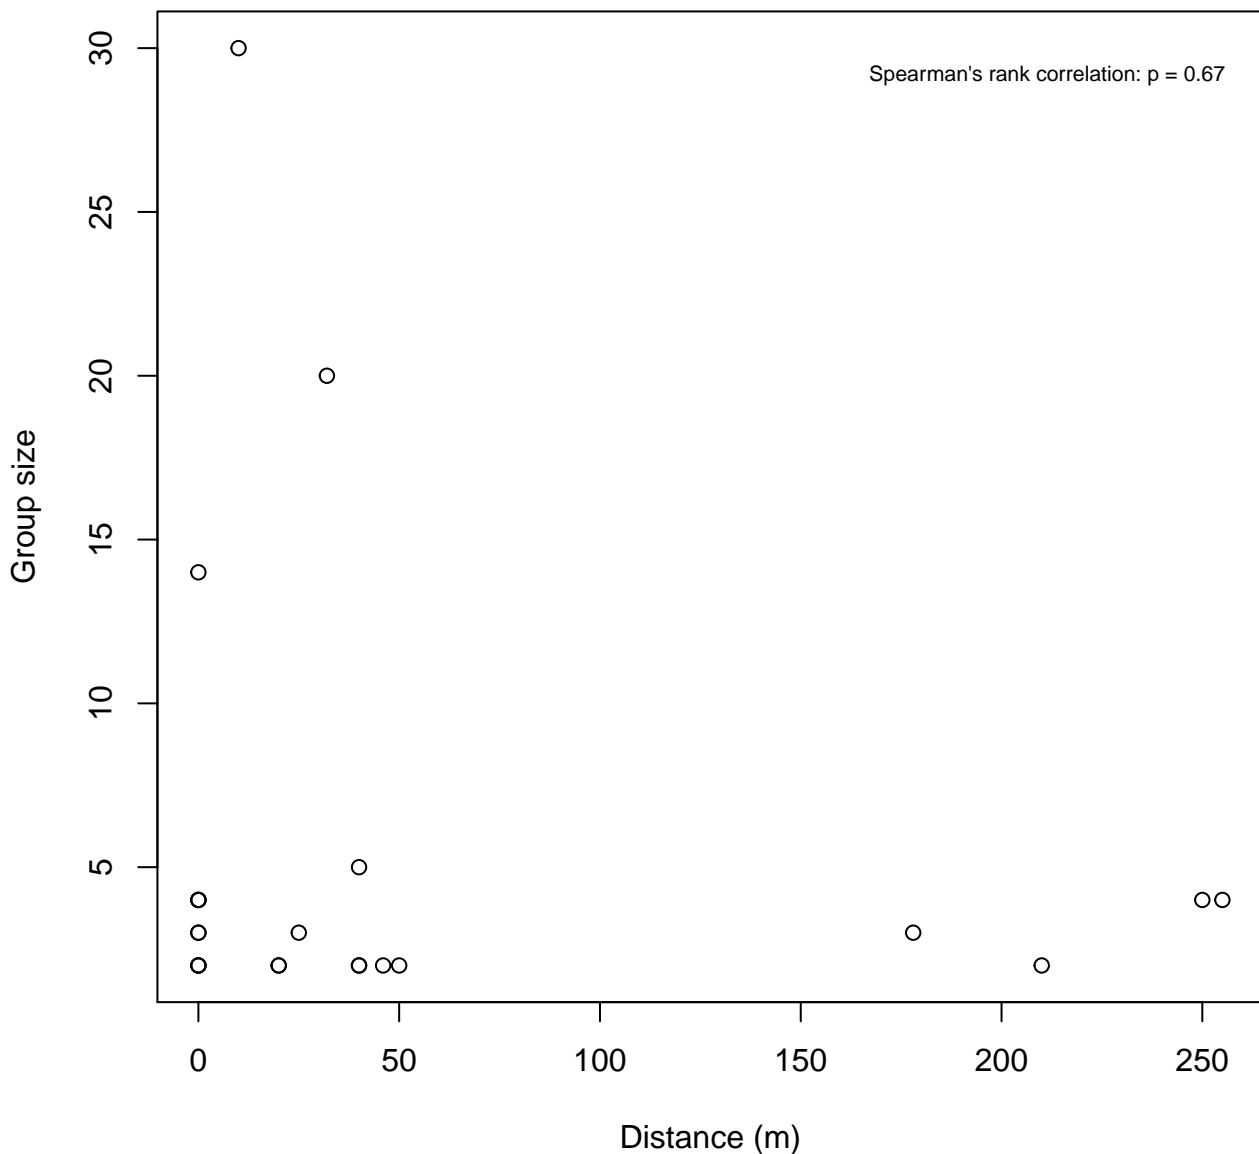

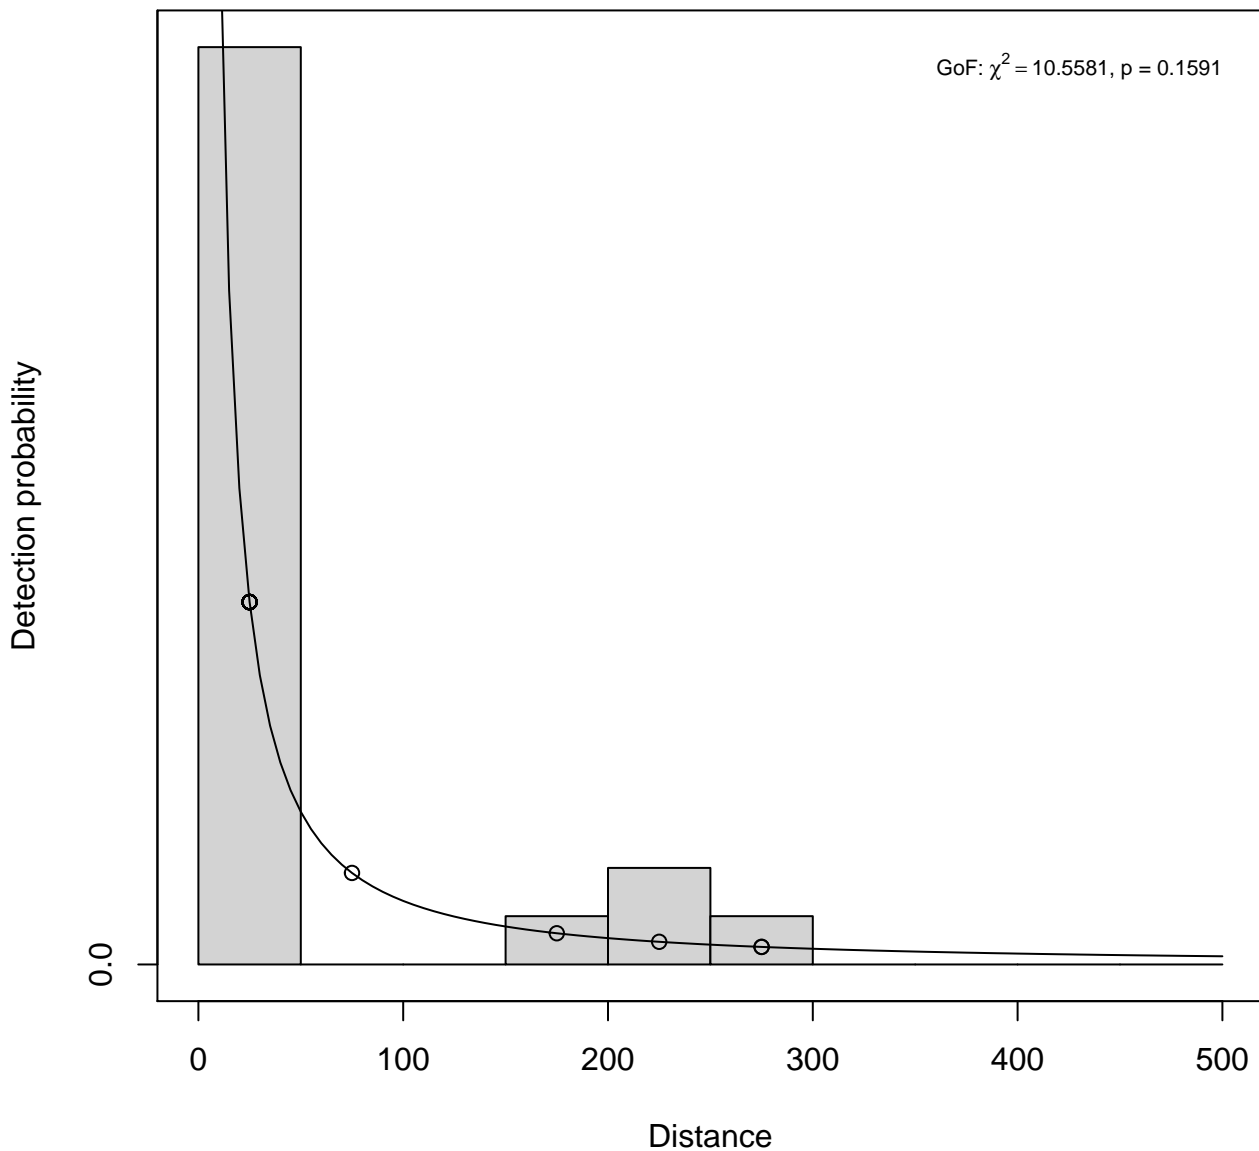

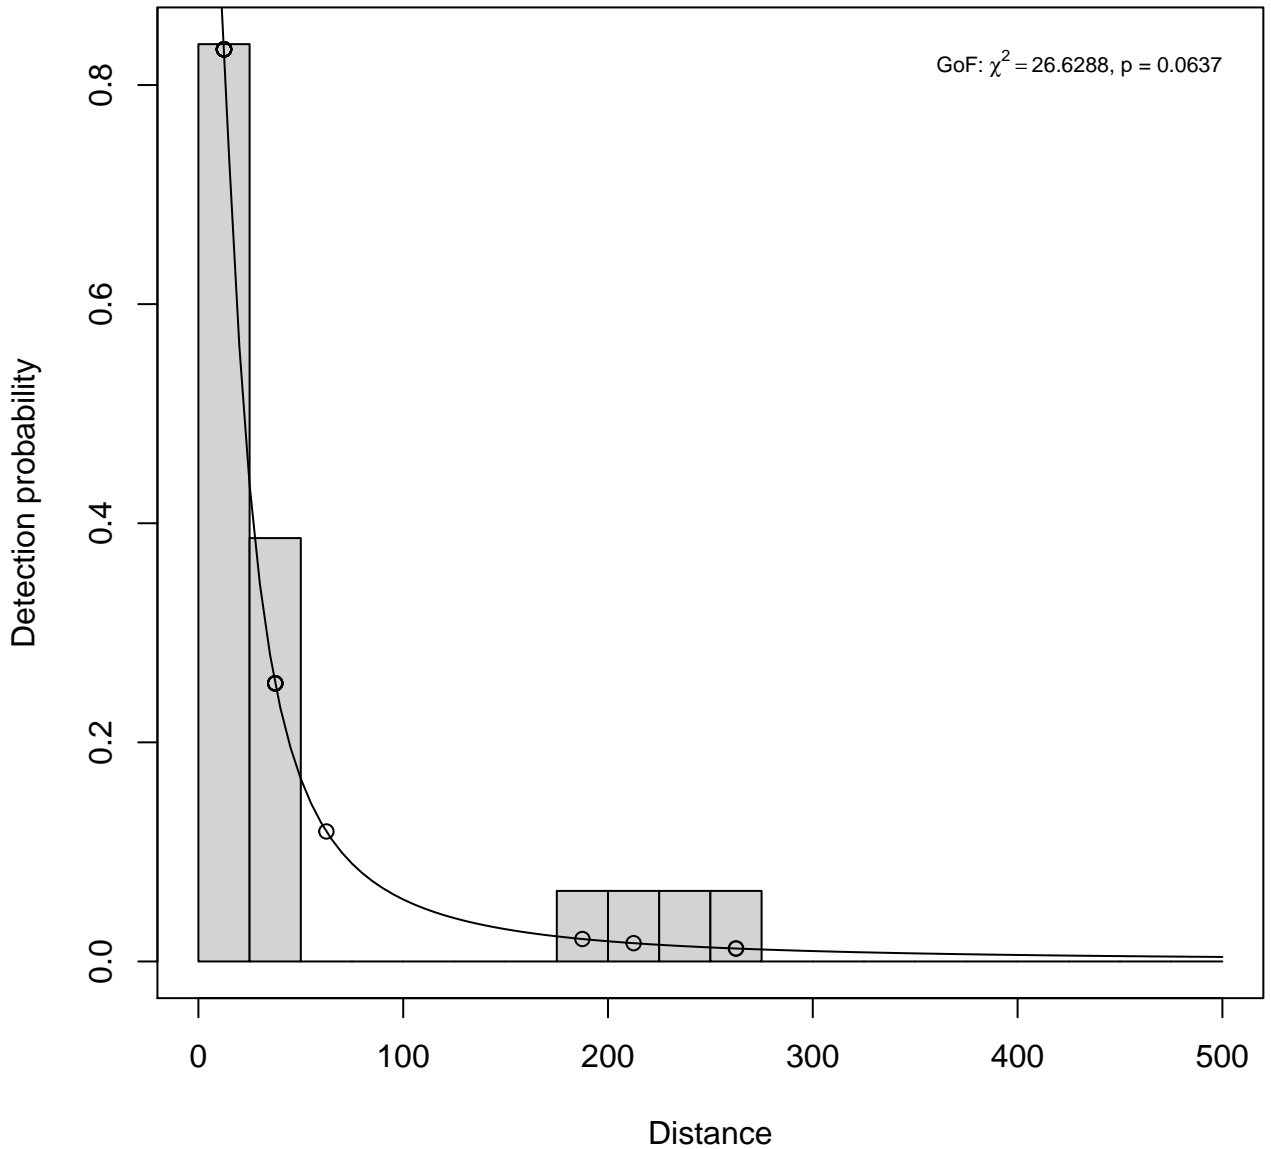

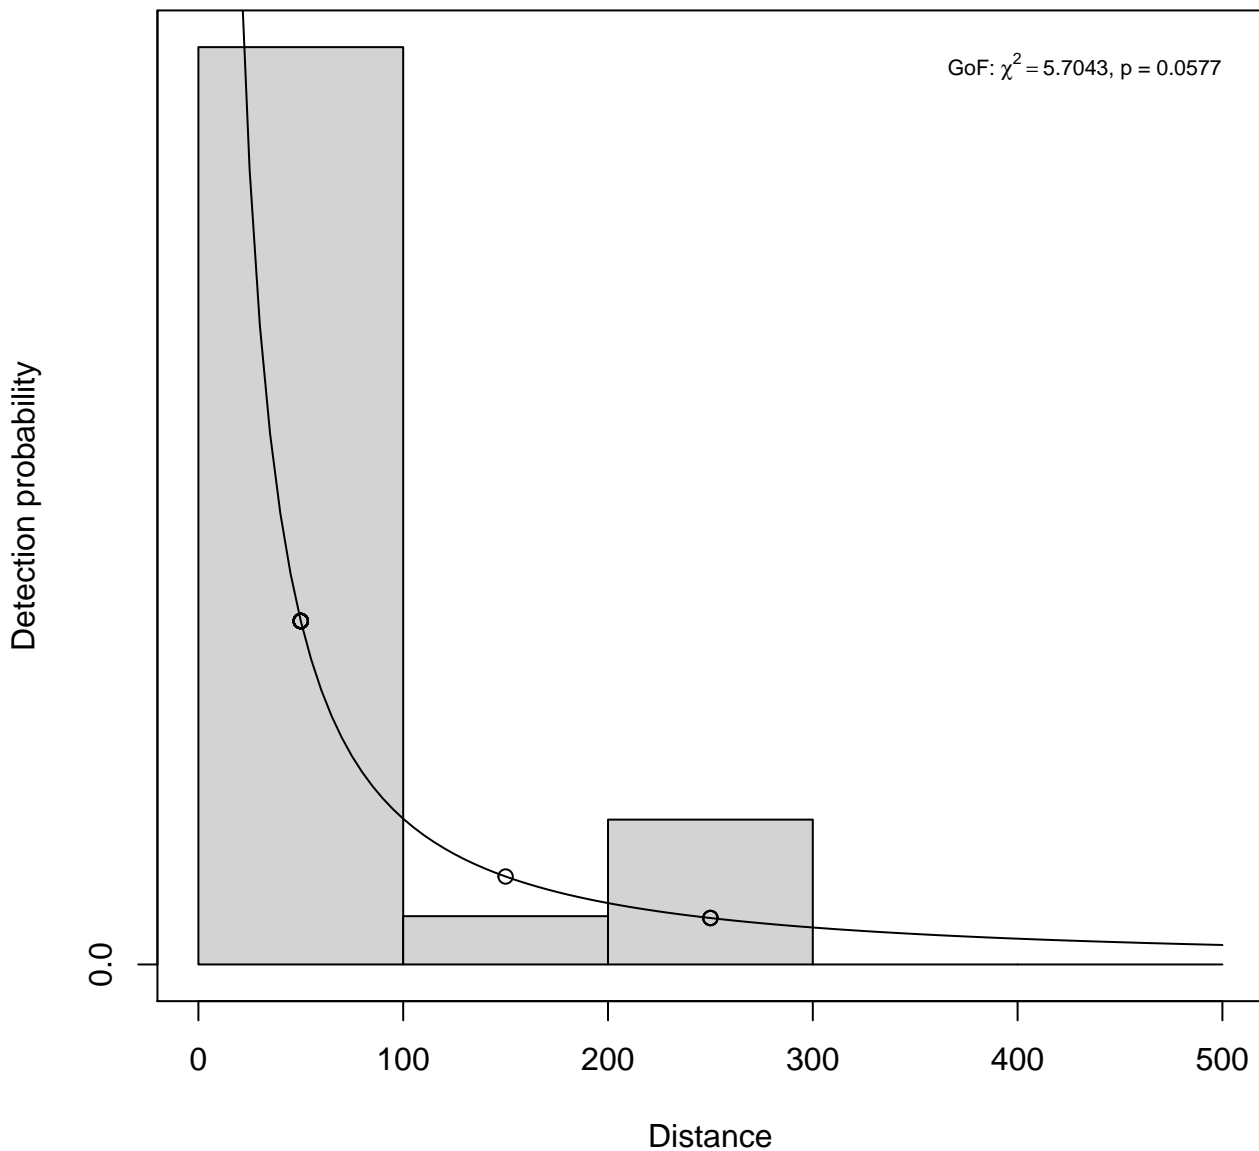

Supplement: s1 [file s1]
