# Supplementary material
Source: MDPI journal article supplement (https://www.mdpi.com/1424-2818/13/7/300)

# **Pionus menstruus – Southwest Amazon moist forests – Peru**

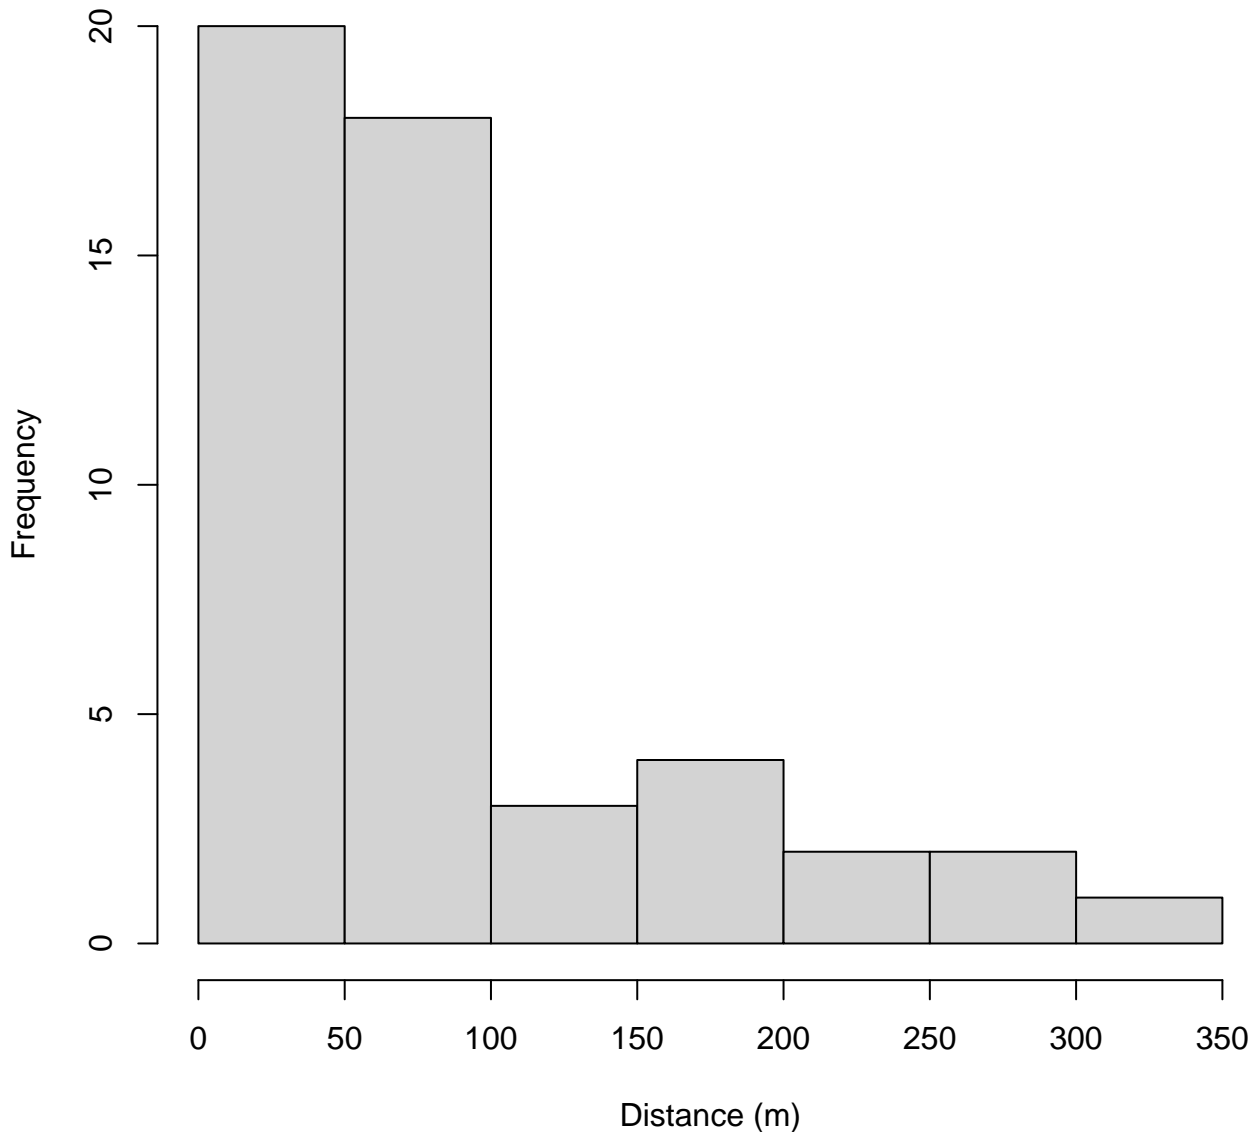

# Pionus menstruus – Southwest Amazon moist forests – Peru

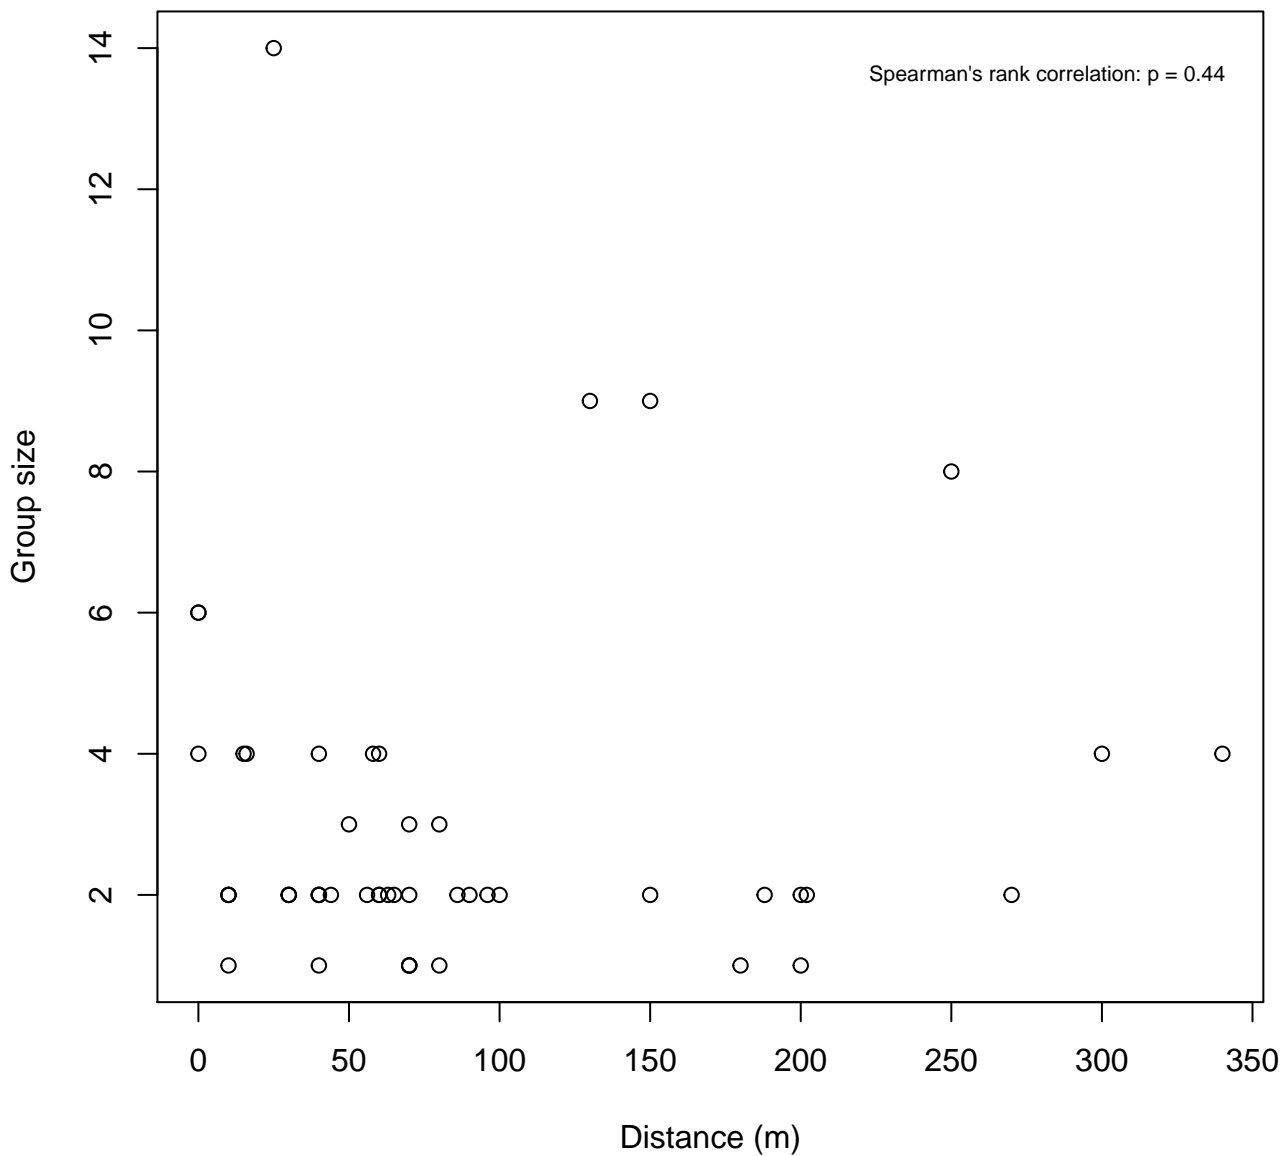

Pionus menstruus – Southwest Amazon moist forests – Peru (N = 50, key function = hn)

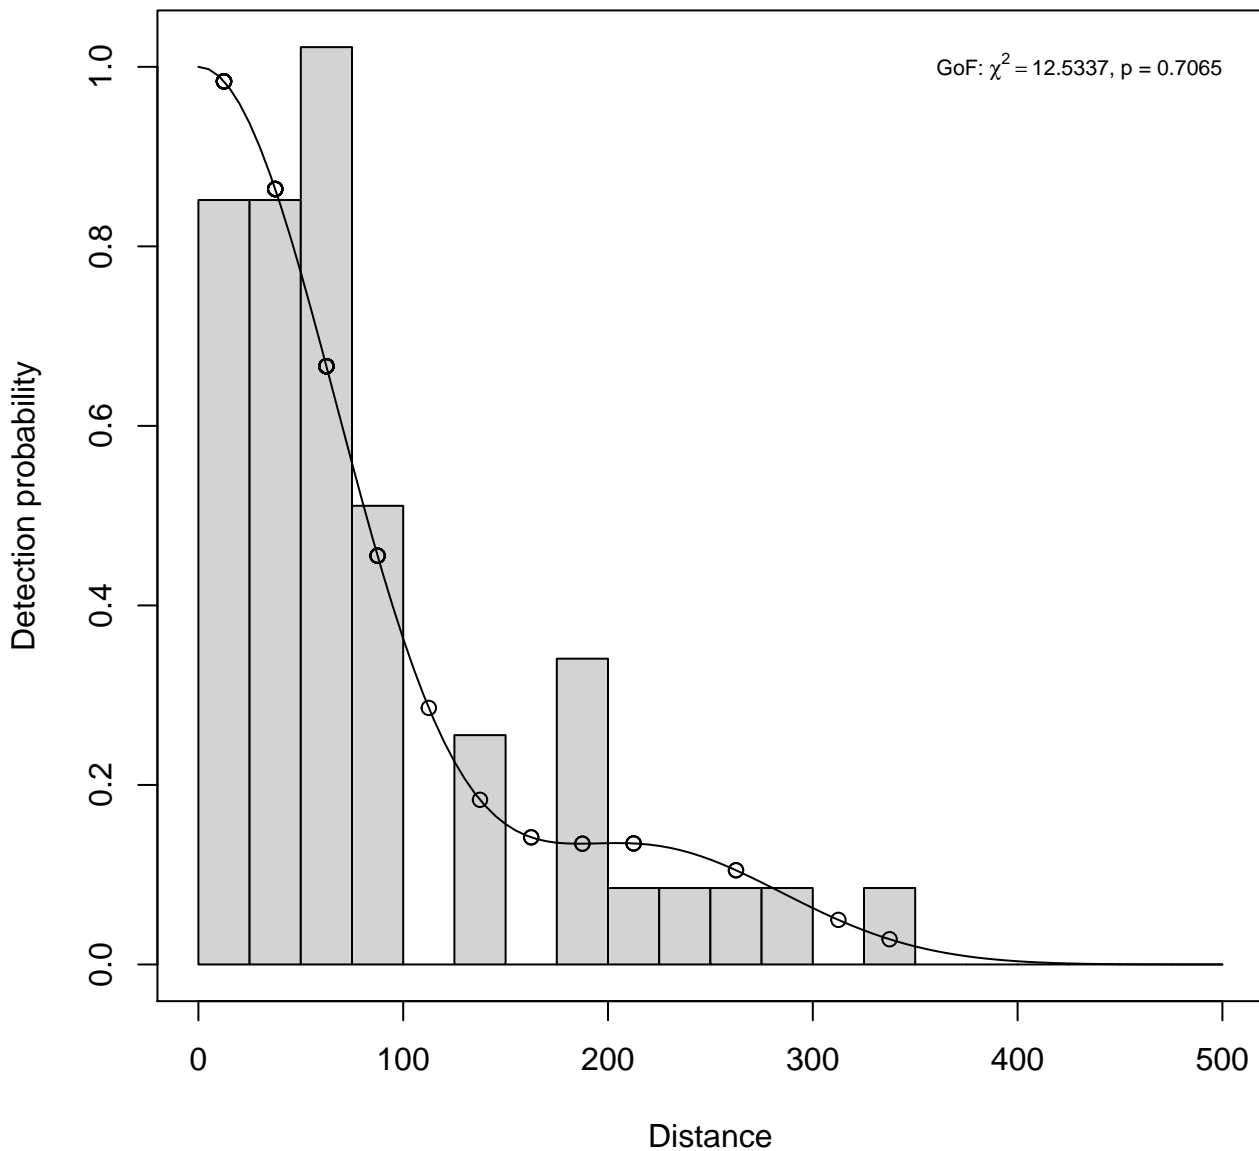

*Pionus menstruus* – Southwest Amazon moist forests – Peru (N = 50, key function = hn)

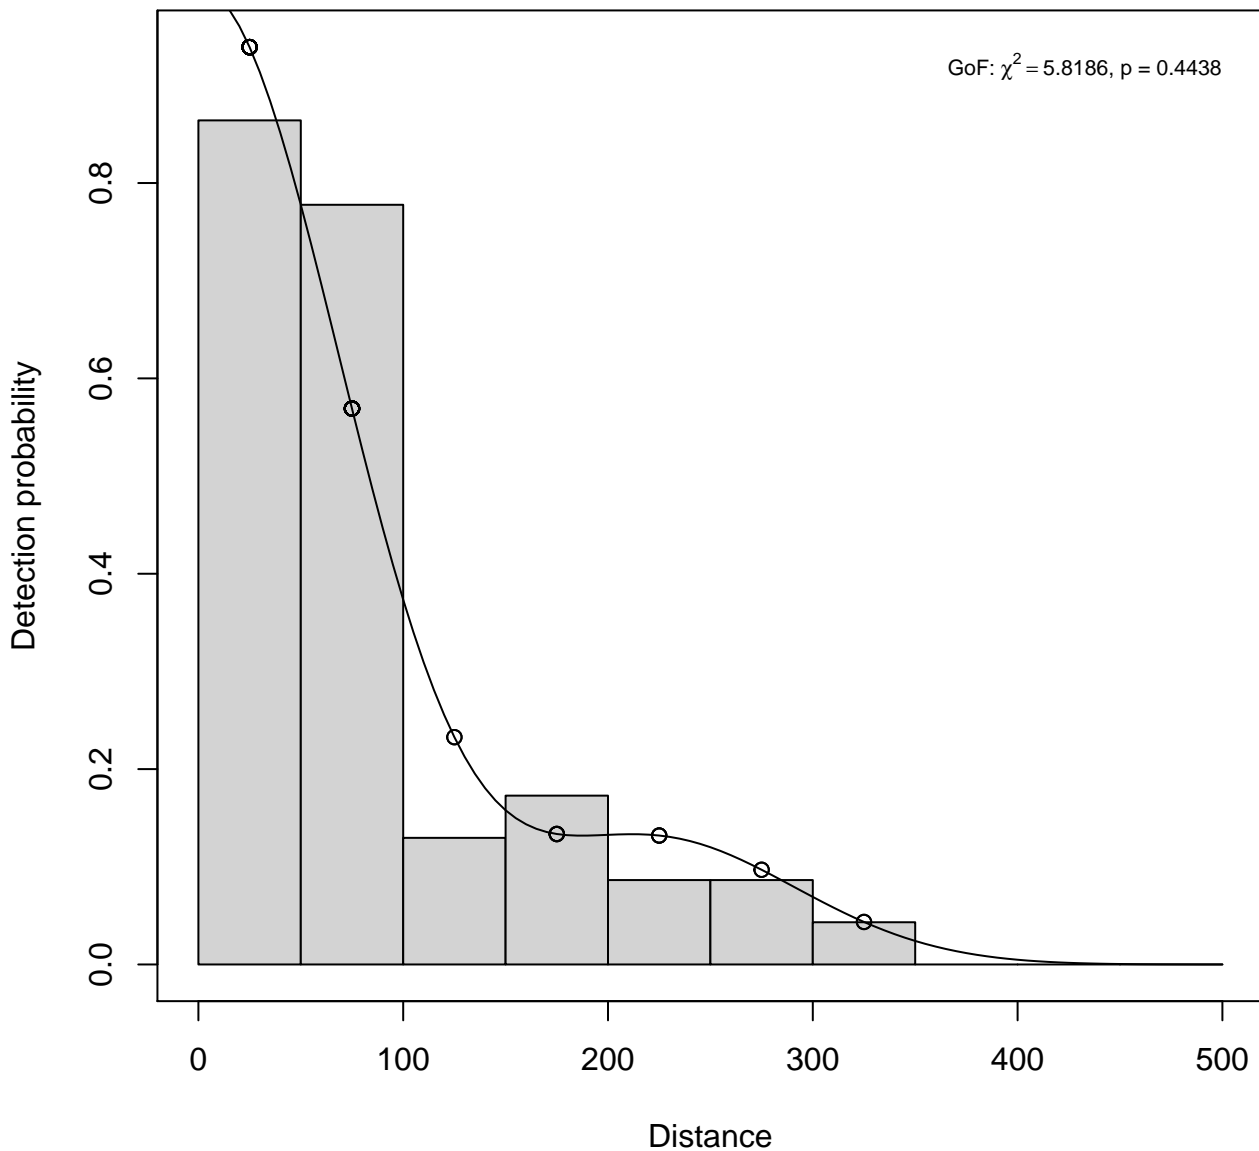

*Pionus menstruus* – Southwest Amazon moist forests – Peru (N = 50, key function = hn)

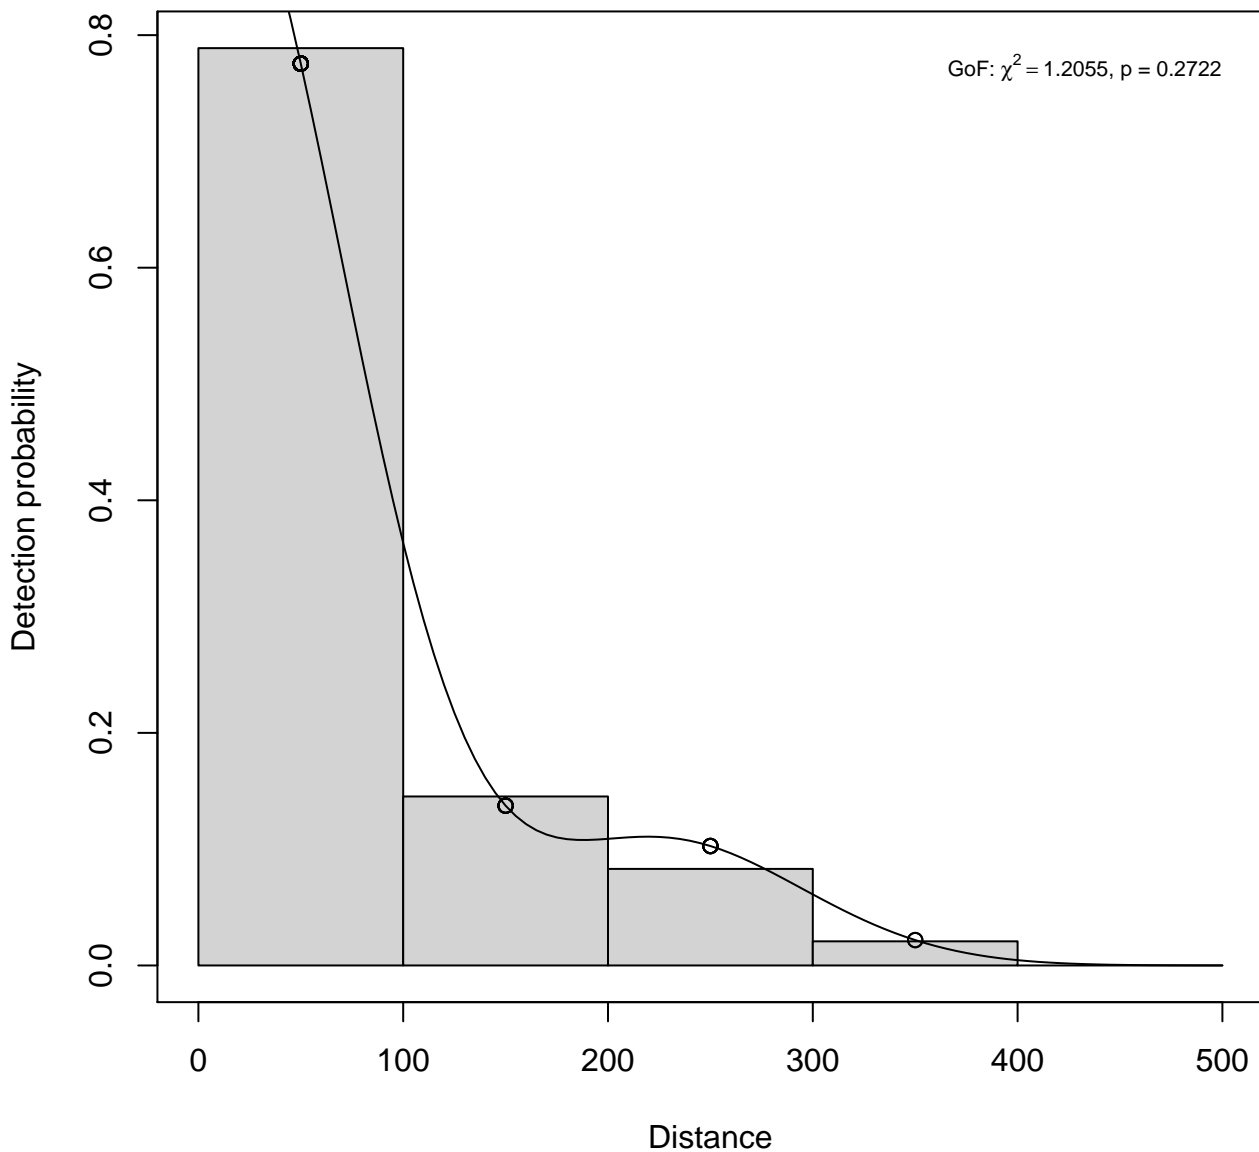

Supplement: s1 [file s1]
