# Supplementary material
Source: MDPI journal article supplement (https://www.mdpi.com/1424-2818/13/7/300)

# ***Psittacara mitratus* – Southern Andean Yungas – Bolivia**

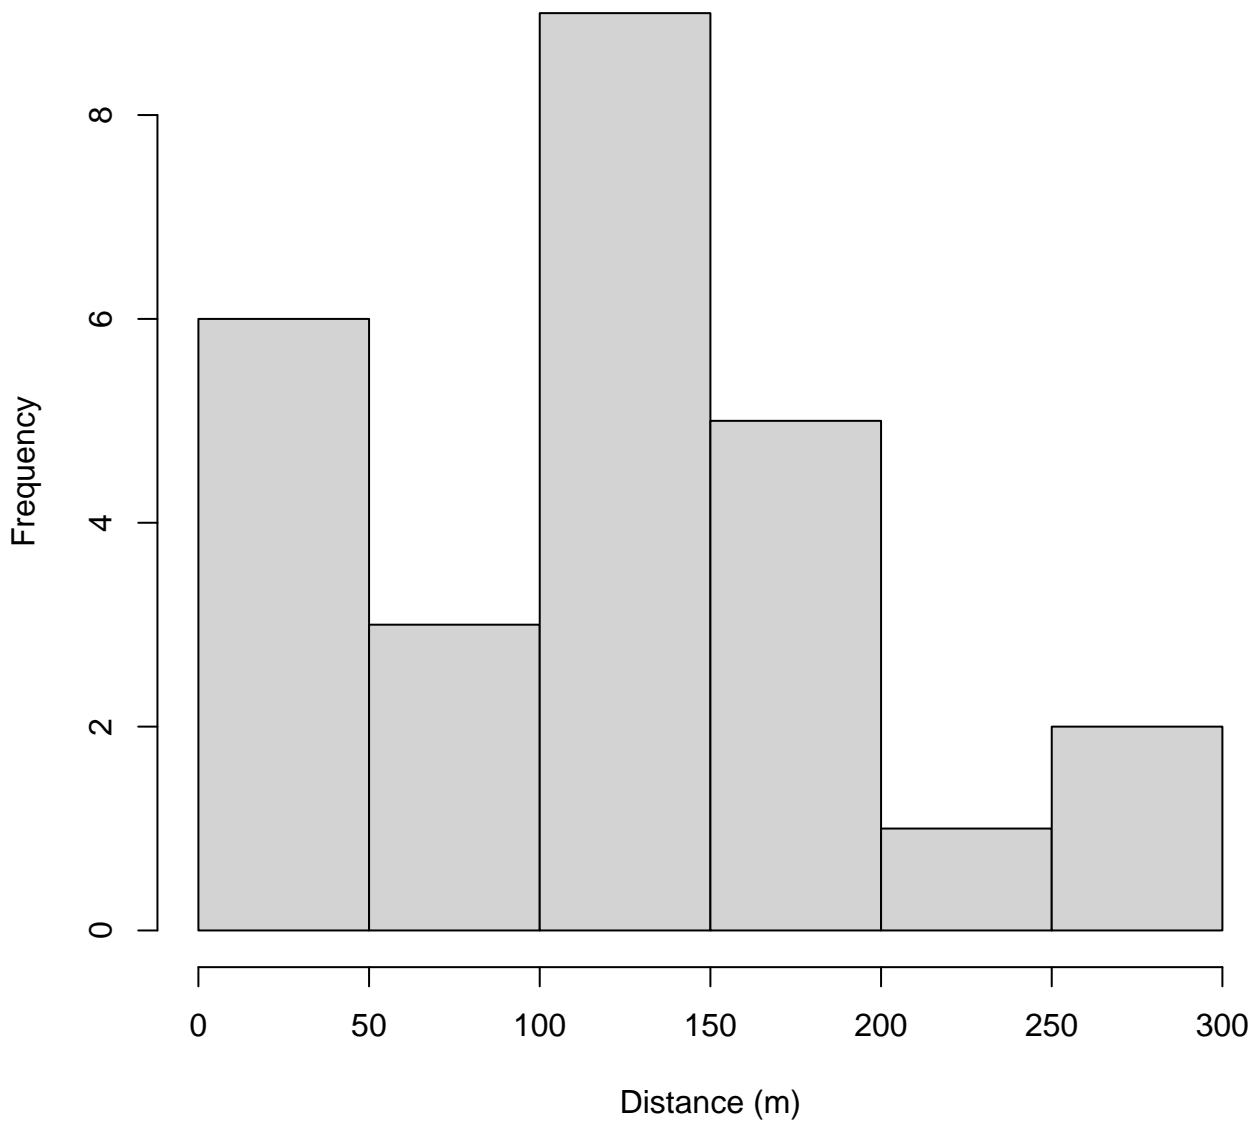

# ***Psittacara mitratus* – Southern Andean Yungas – Bolivia**

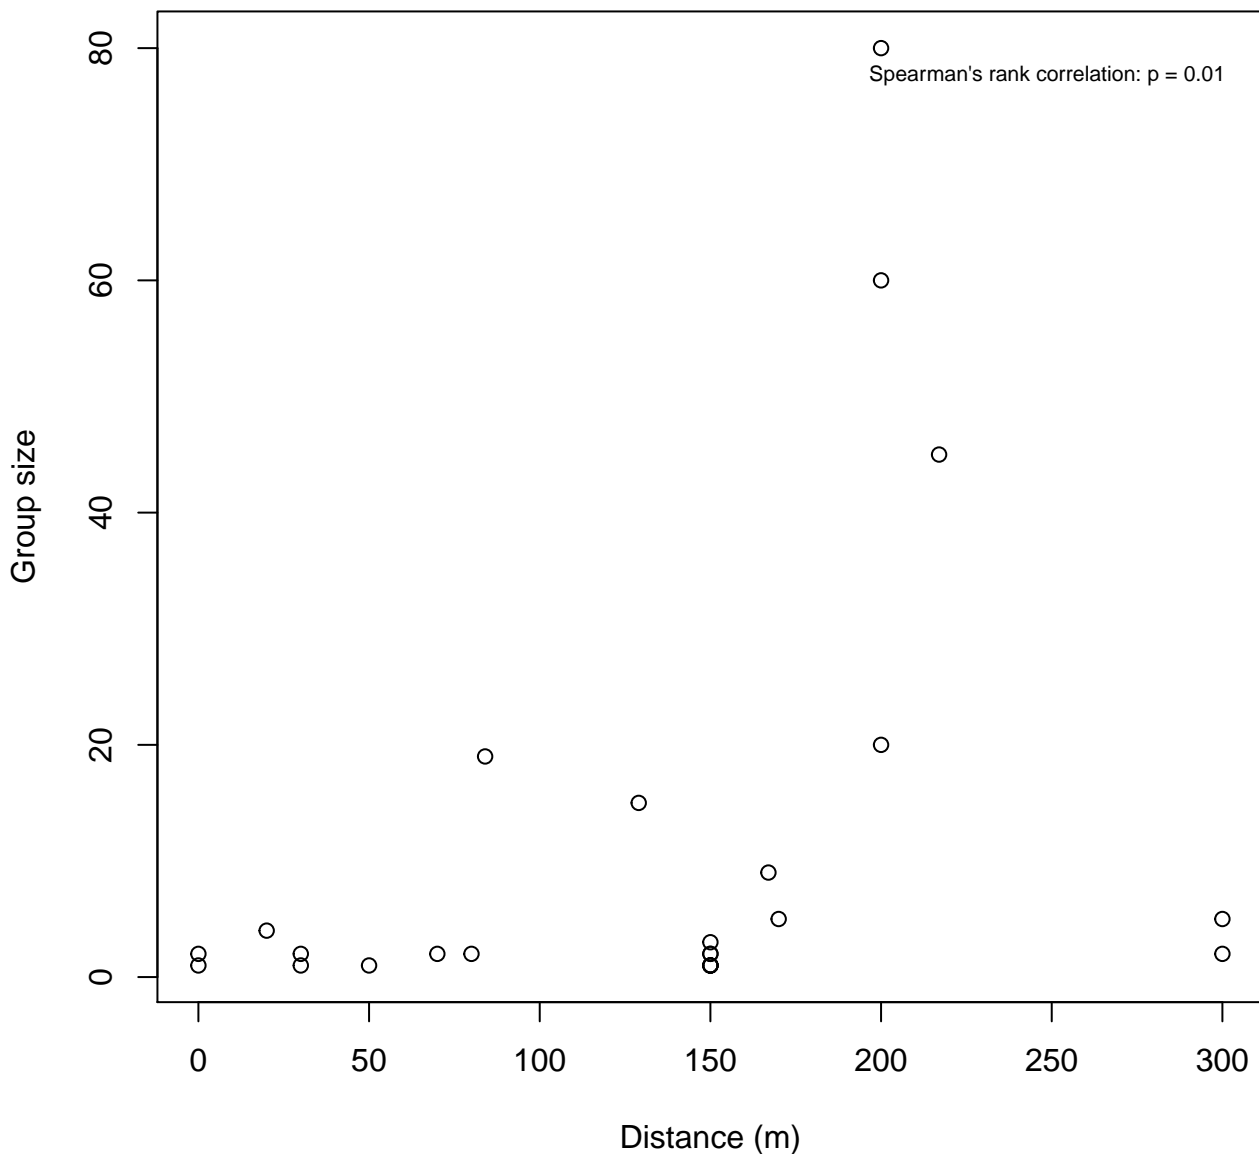

*Psittacara mitratus* – Southern Andean Yungas – Bolivia (N = 26, key function = unif)

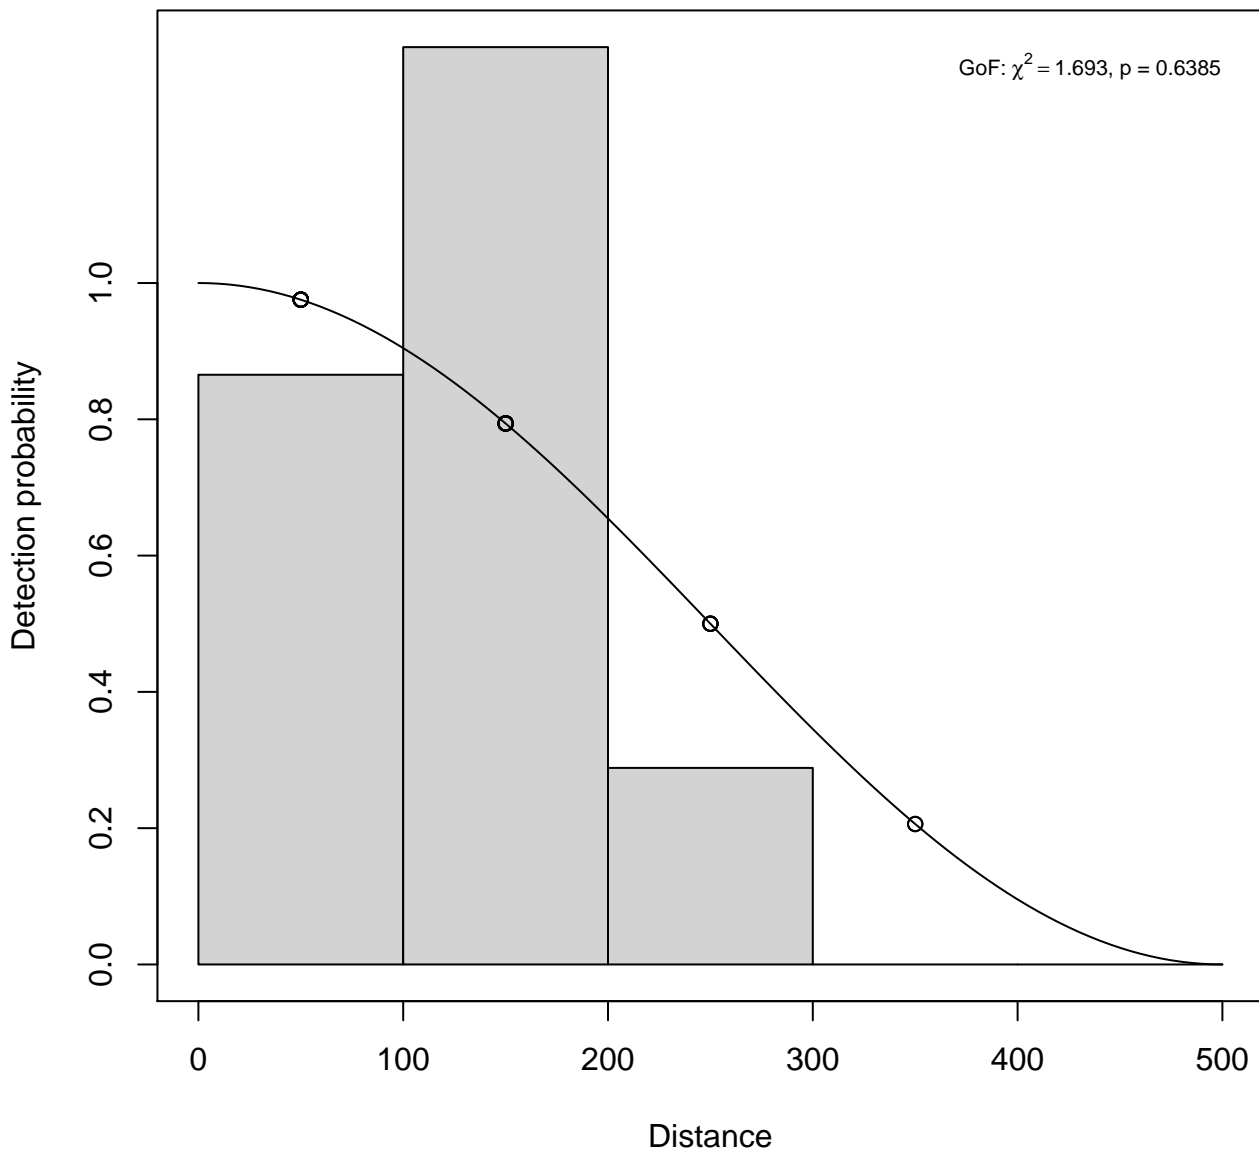

Psittacara mitratus – Southern Andean Yungas – Bolivia (N = 26, key function = hr)

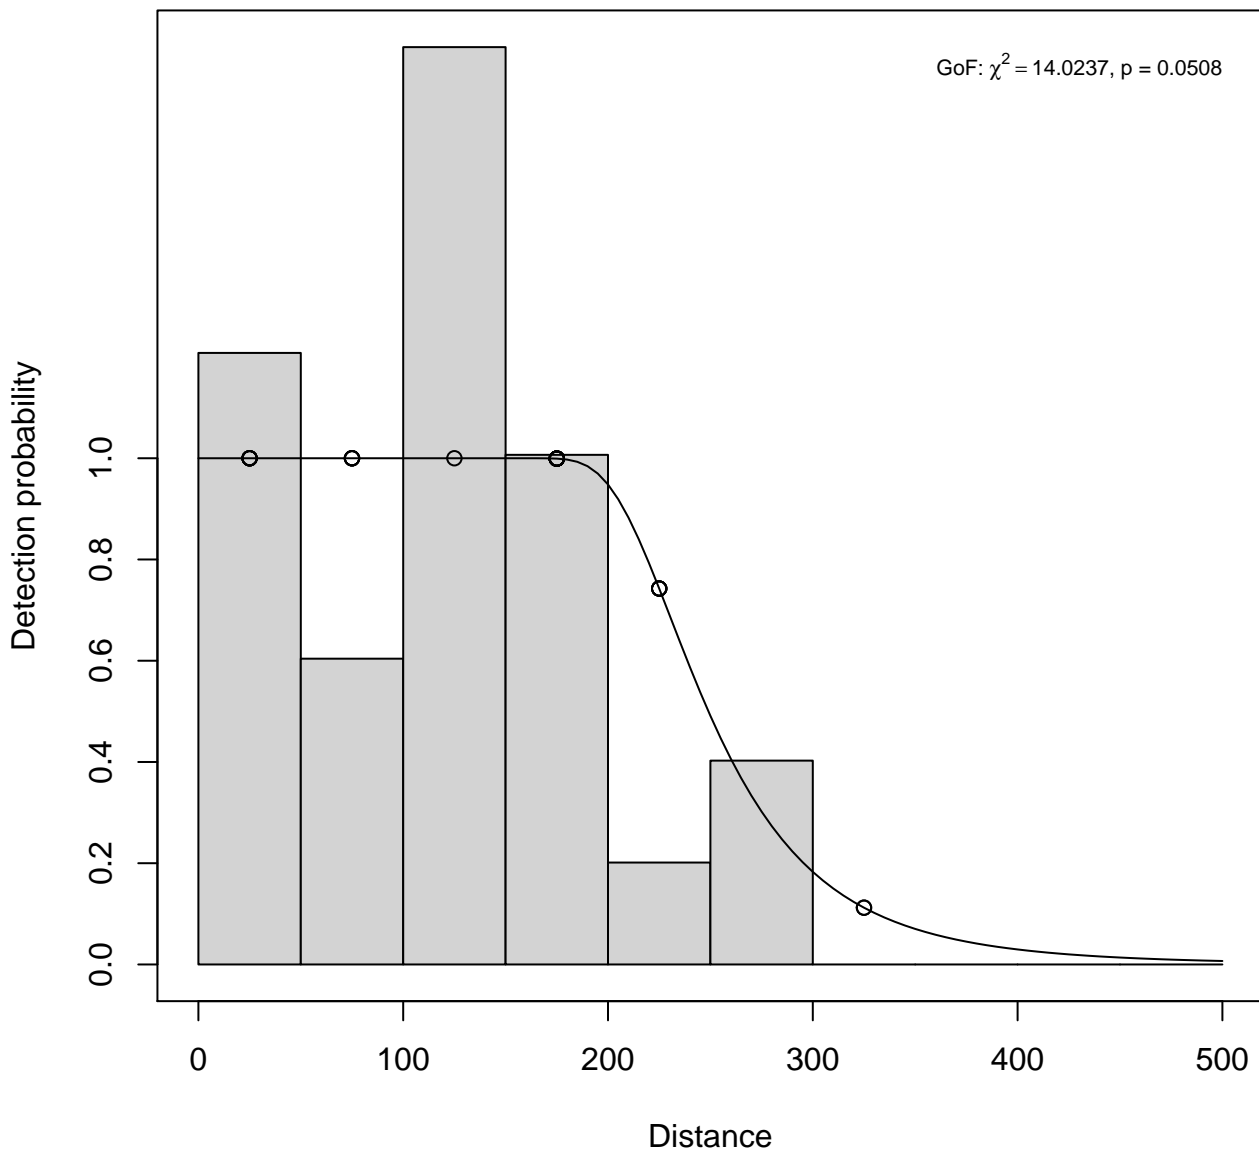

Psittacara mitratus – Southern Andean Yungas – Bolivia (N = 26, key function = hr)

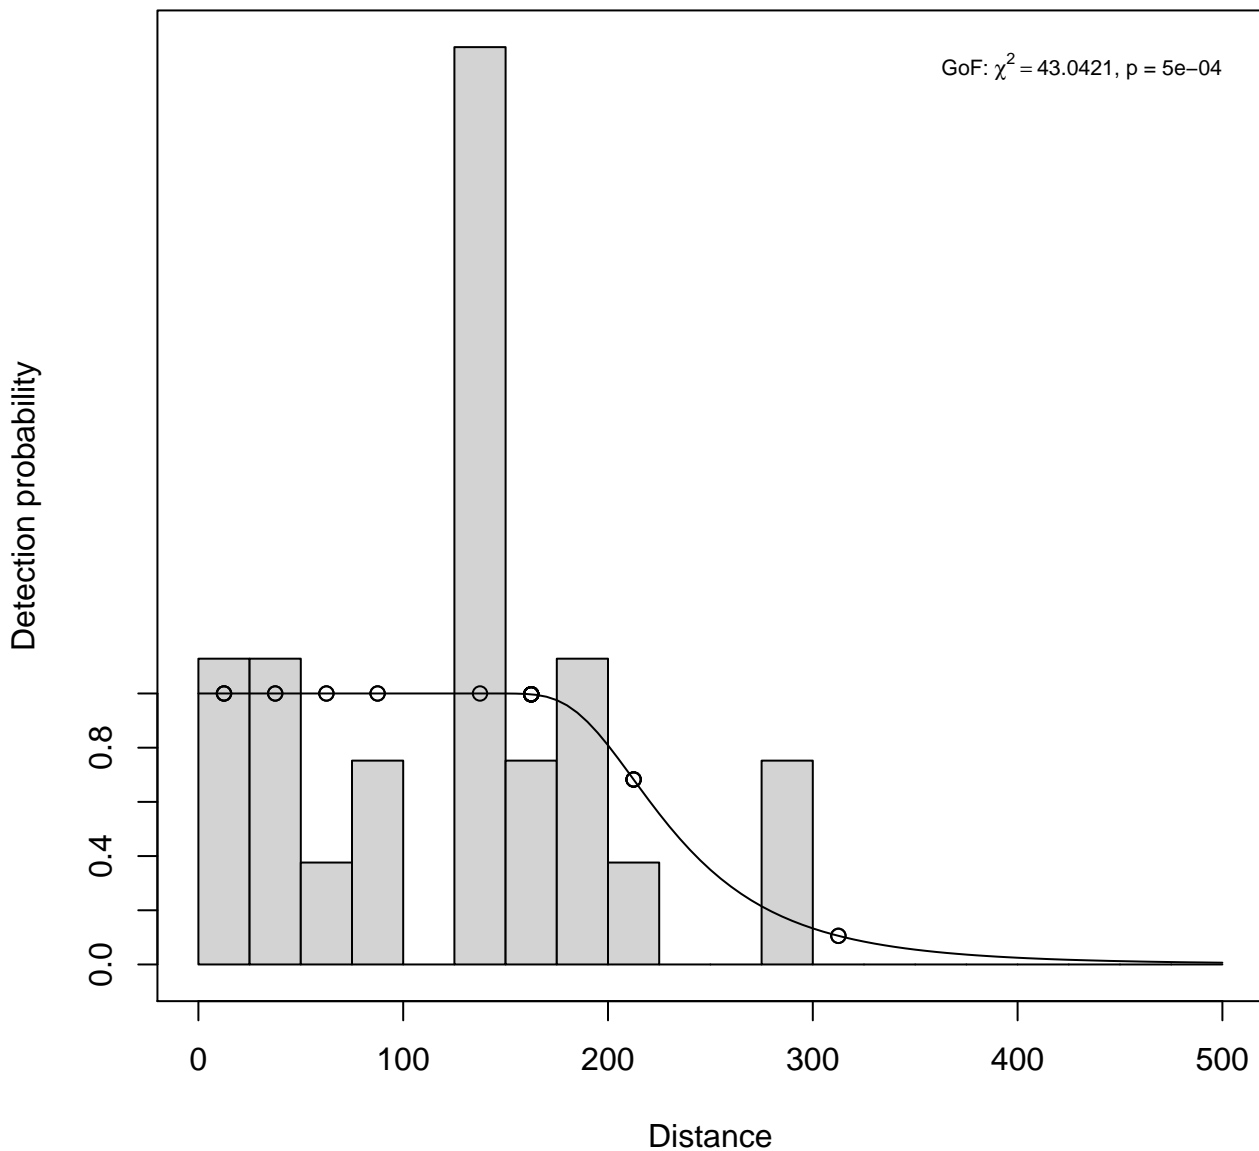

Supplement: s1 [file s1]
