# Supplementary material
Source: MDPI journal article supplement (https://www.mdpi.com/1424-2818/13/7/300)

# Cyanoliseus patagonus – Espinal – Argentina

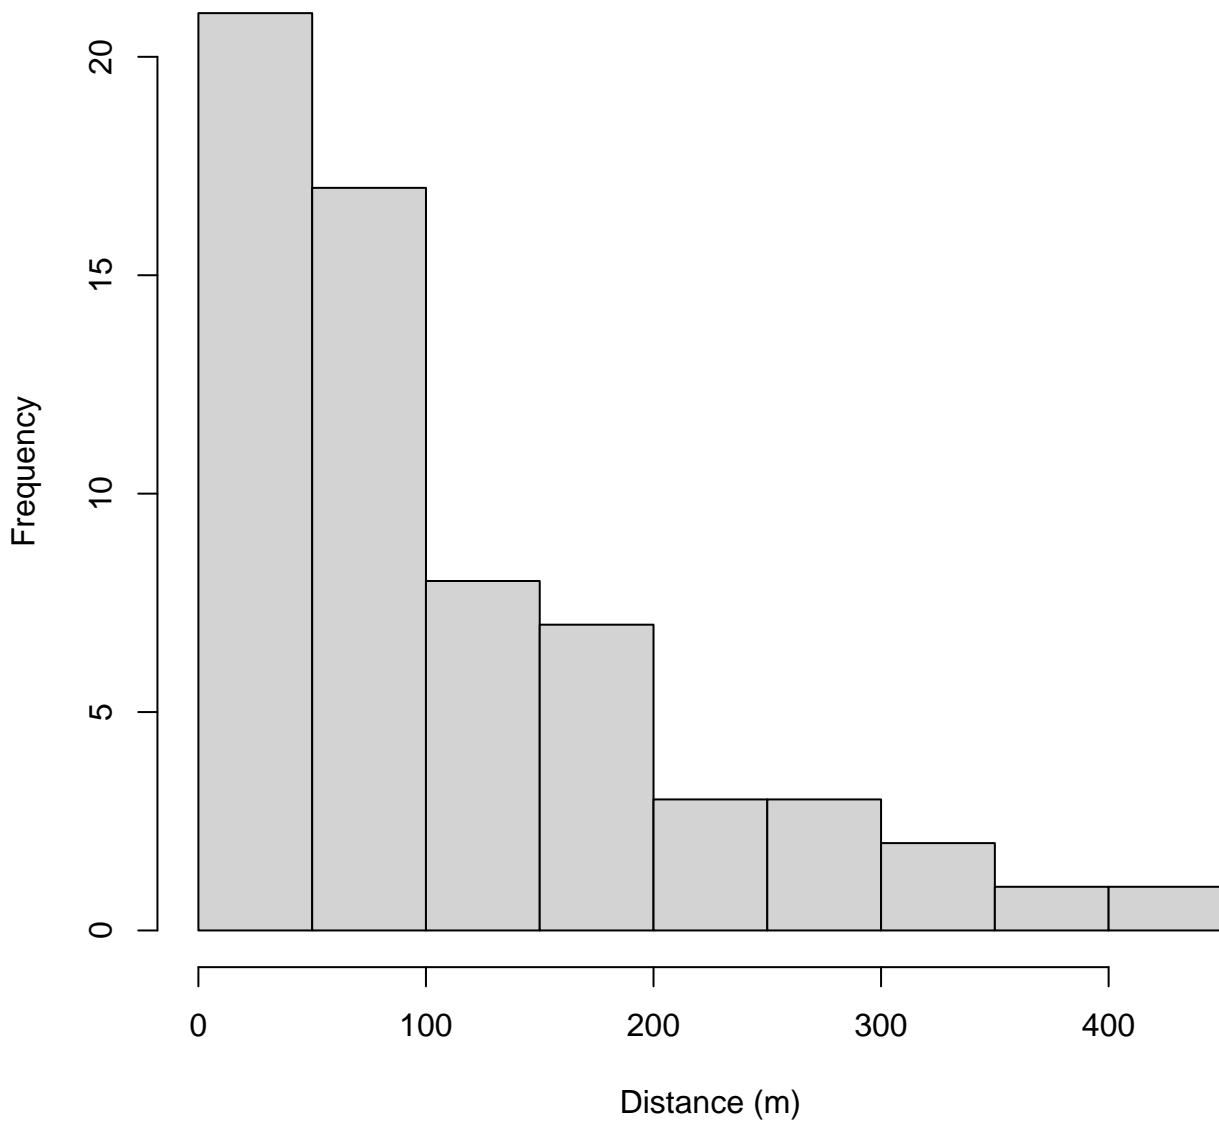

# Cyanoliseus patagonus – Espinal – Argentina

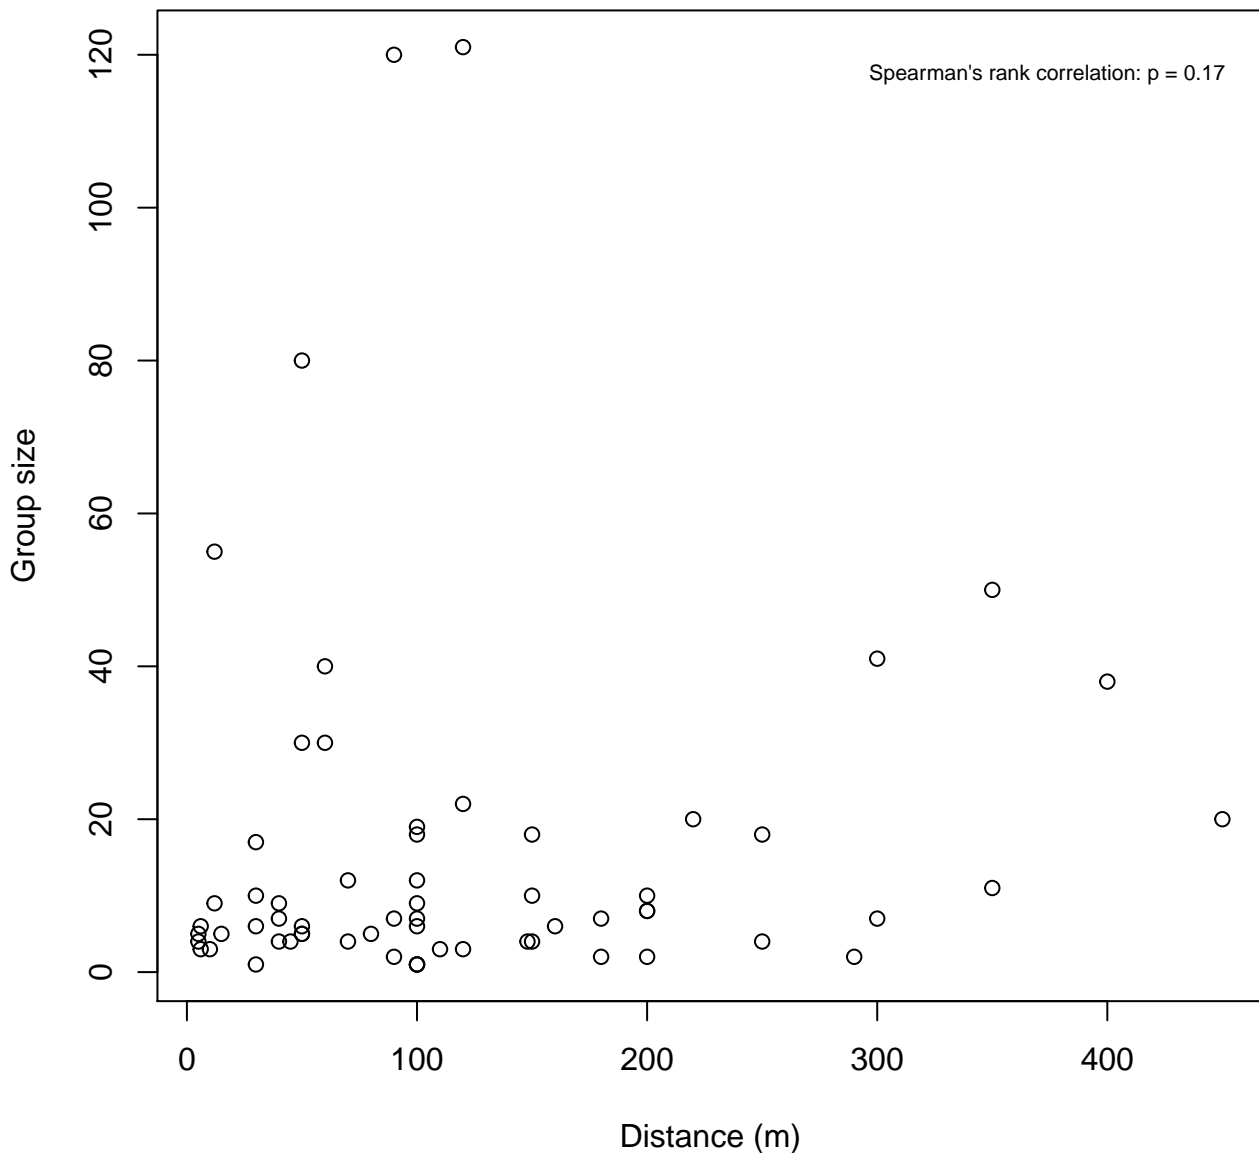

Cyanoliseus patagonus – Espinal – Argentina (N = 63, key function = hr)

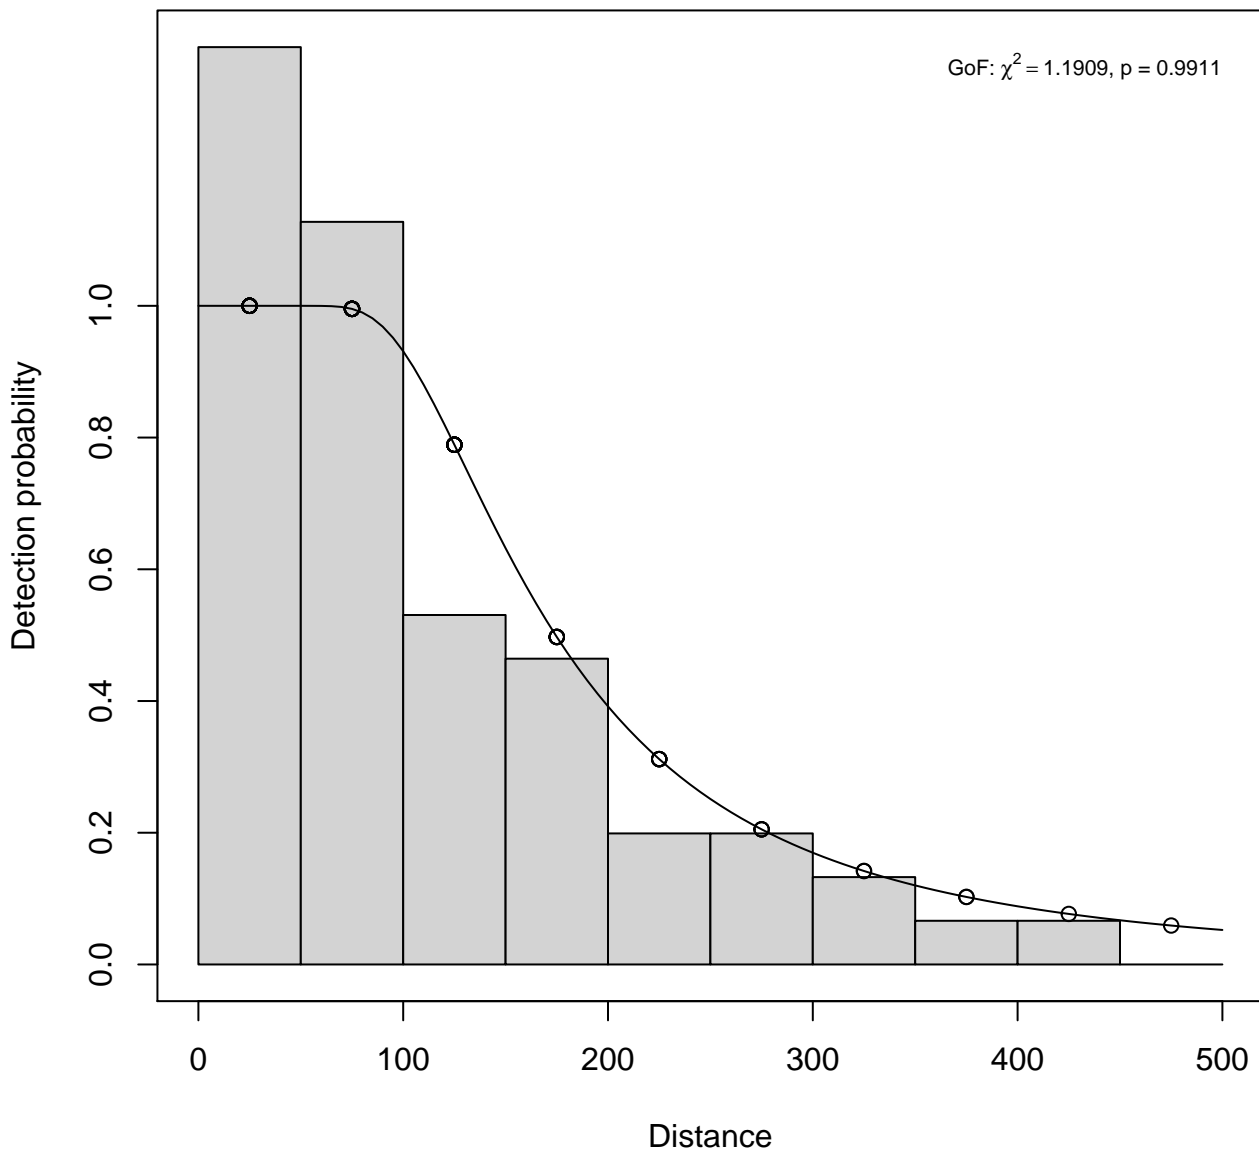

Cyanoliseus patagonus – Espinal – Argentina (N = 63, key function = hn)

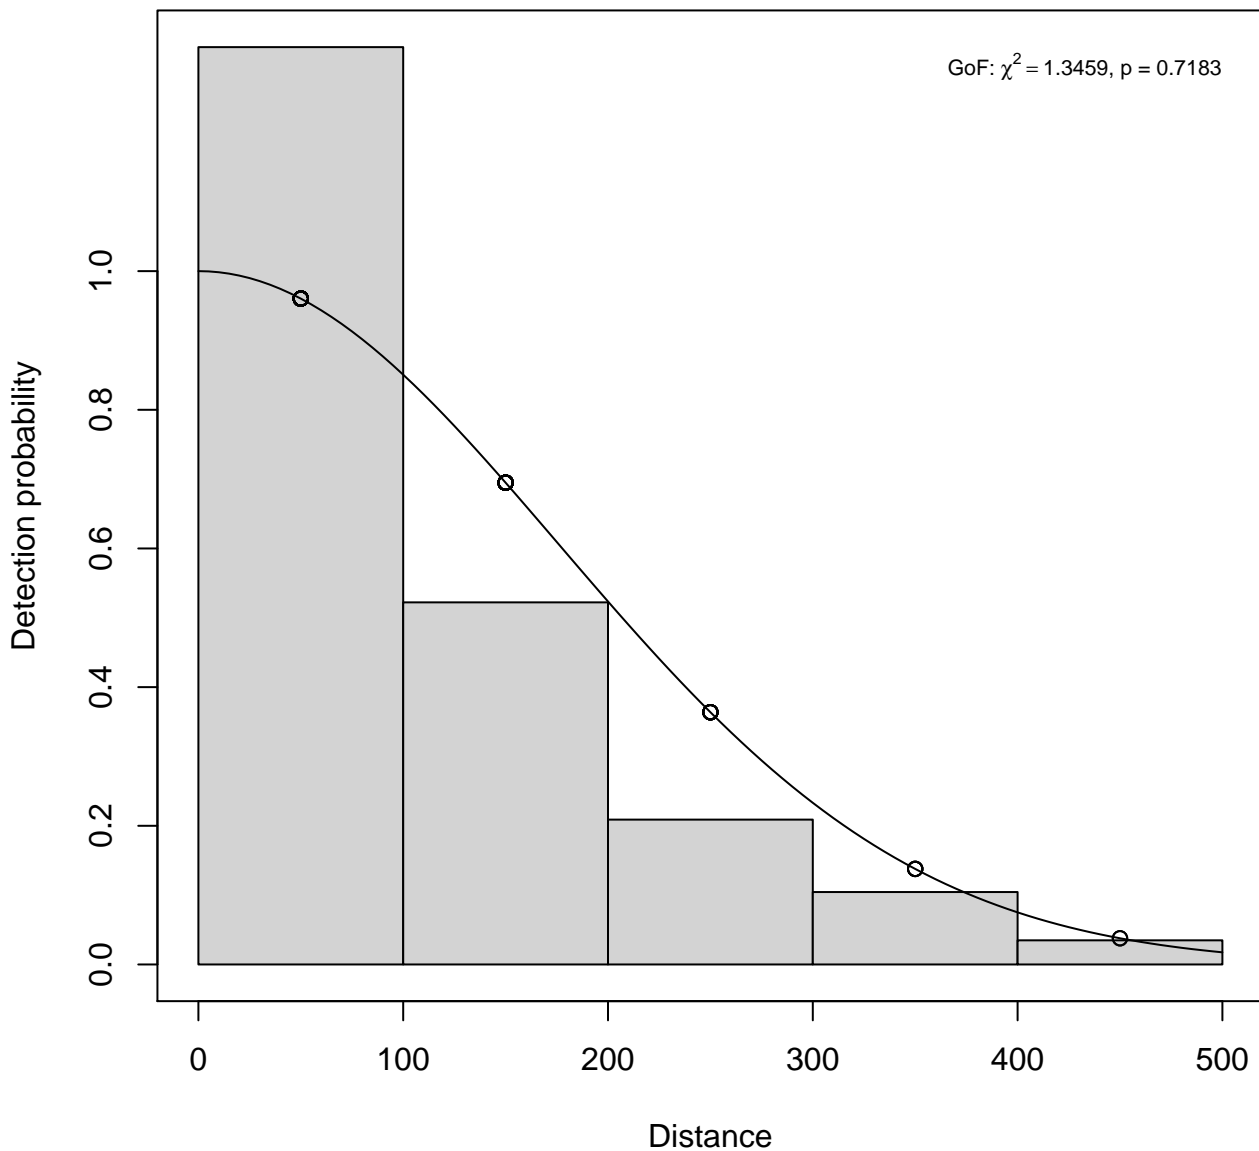

Cyanoliseus patagonus – Espinal – Argentina (N = 63, key function = hr)

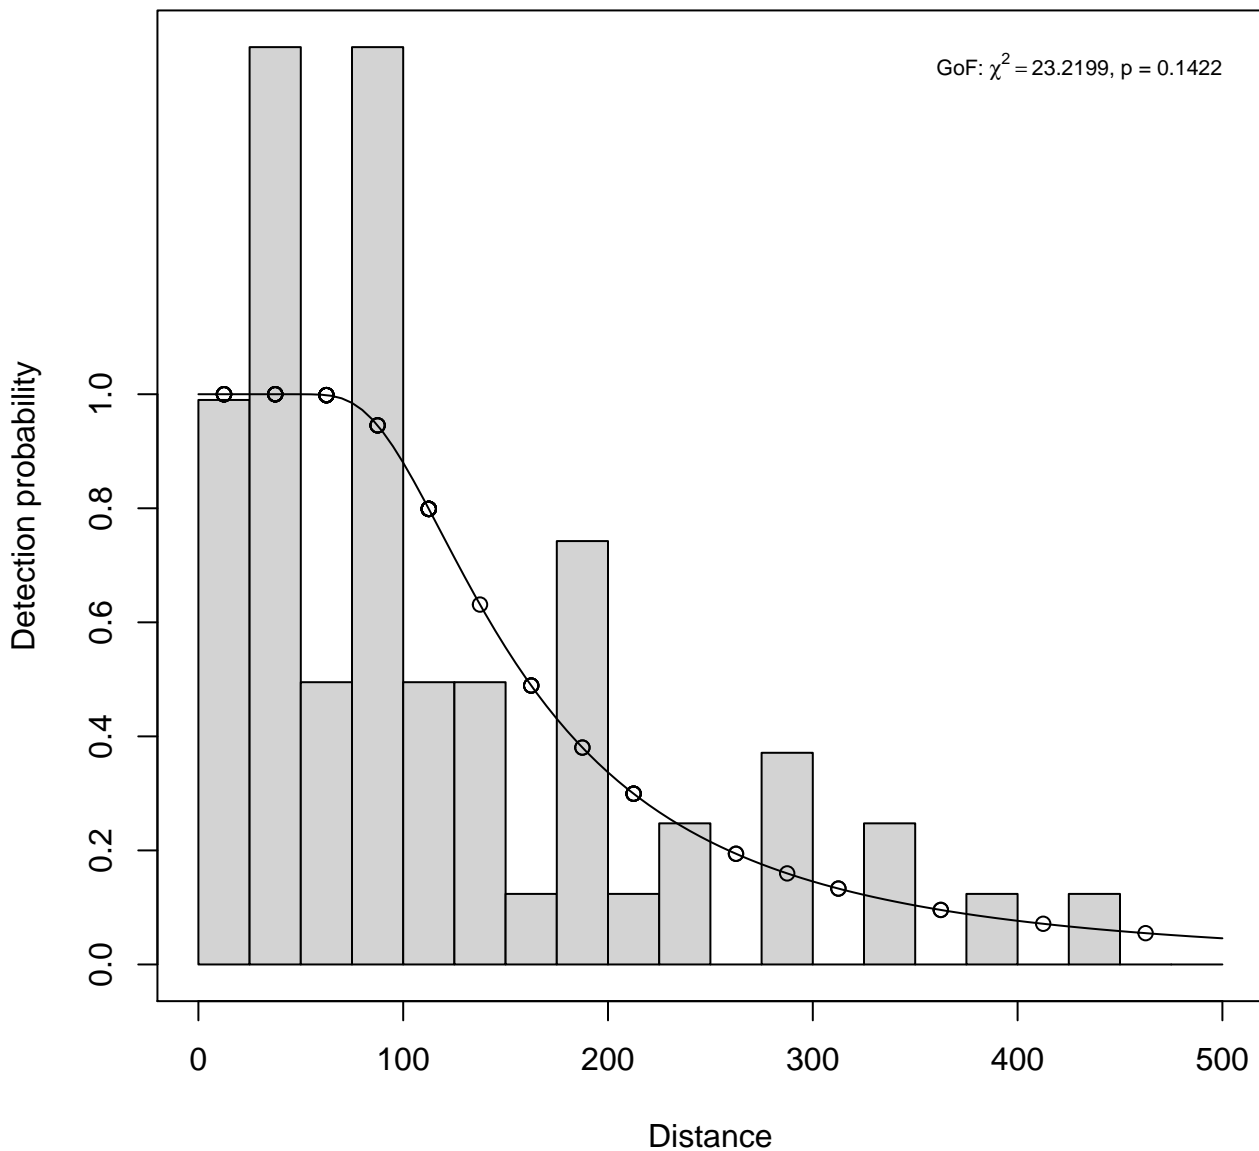

Supplement: s1 [file s1]
