# Supplementary material
Source: MDPI journal article supplement (https://www.mdpi.com/1424-2818/13/7/300)

# Amazona autumnalis – Isthmian–Pacific moist forests – Panama

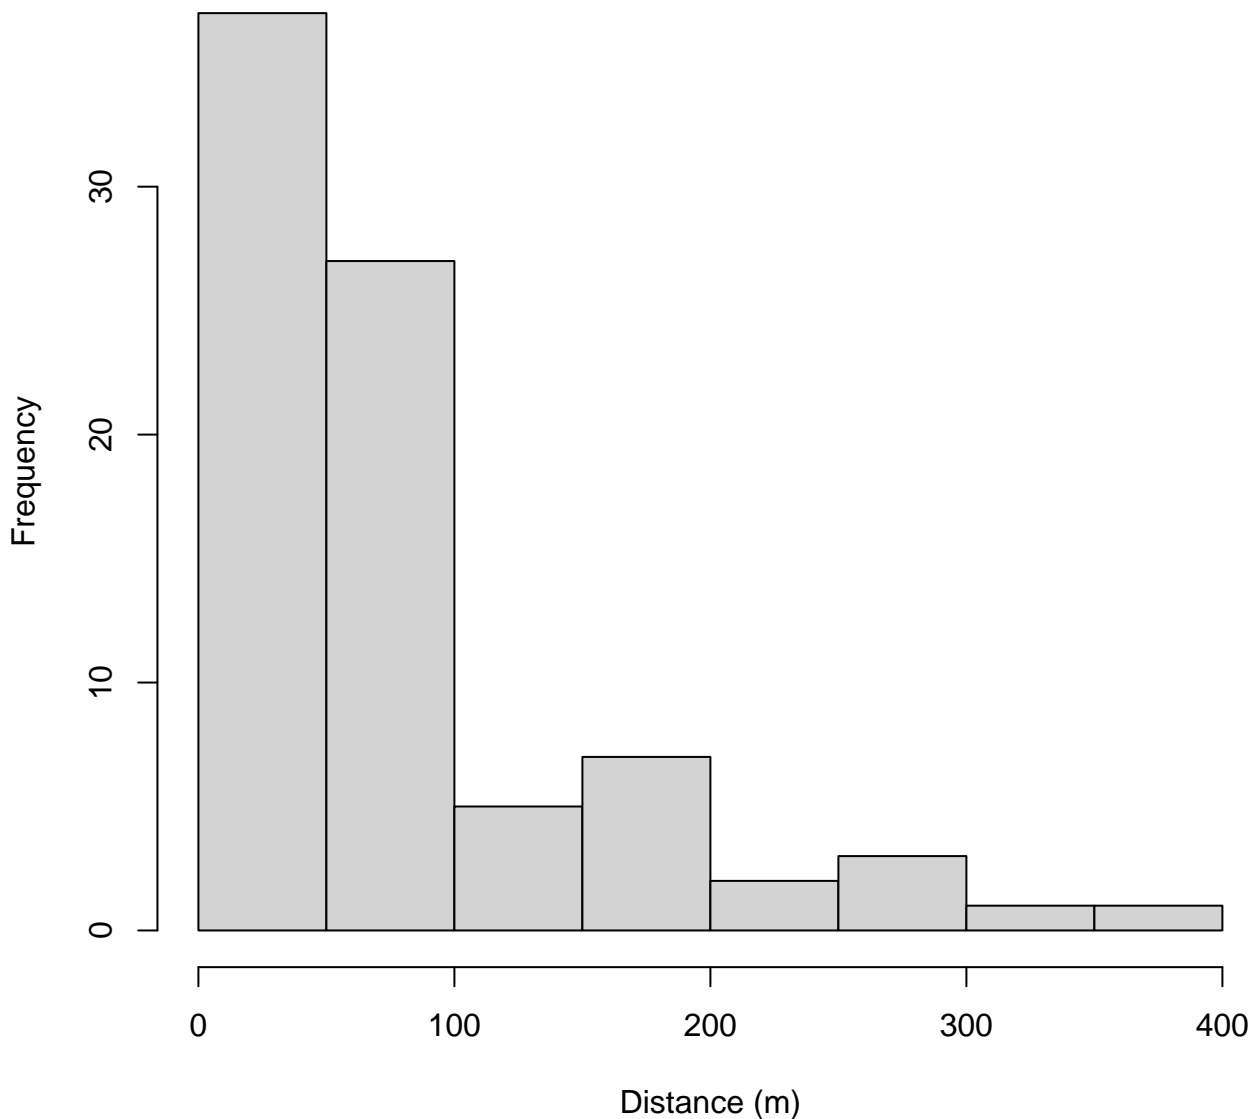

# Amazona autumnalis – Isthmian–Pacific moist forests – Panama

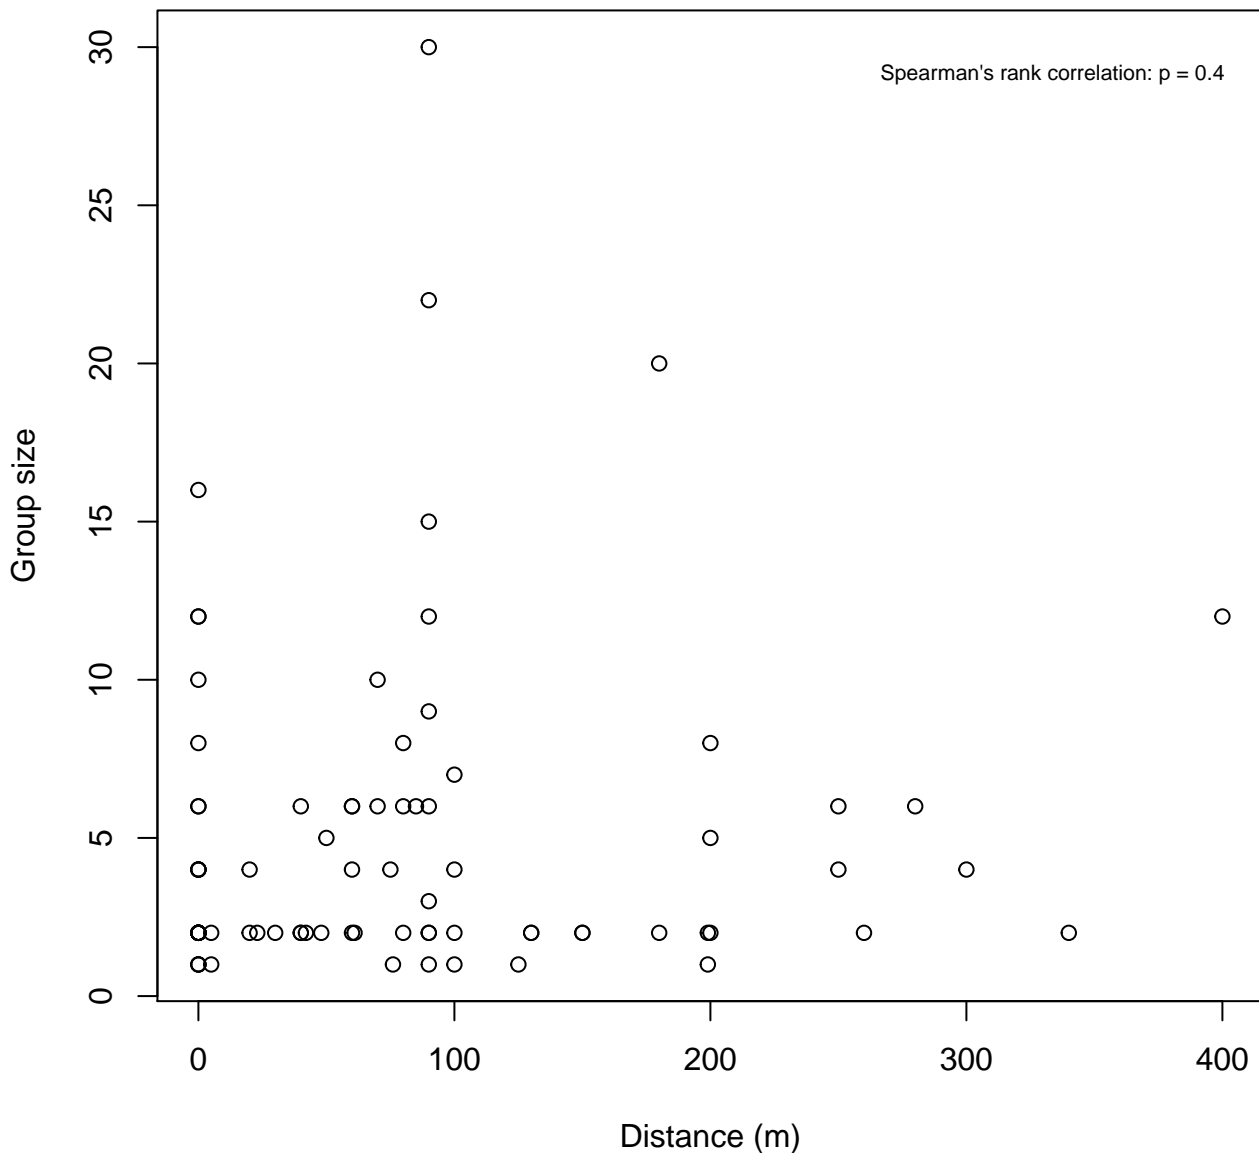

*Amazona autumnalis* – Isthmian–Pacific moist forests – Panama (N = 83, key function = hr)

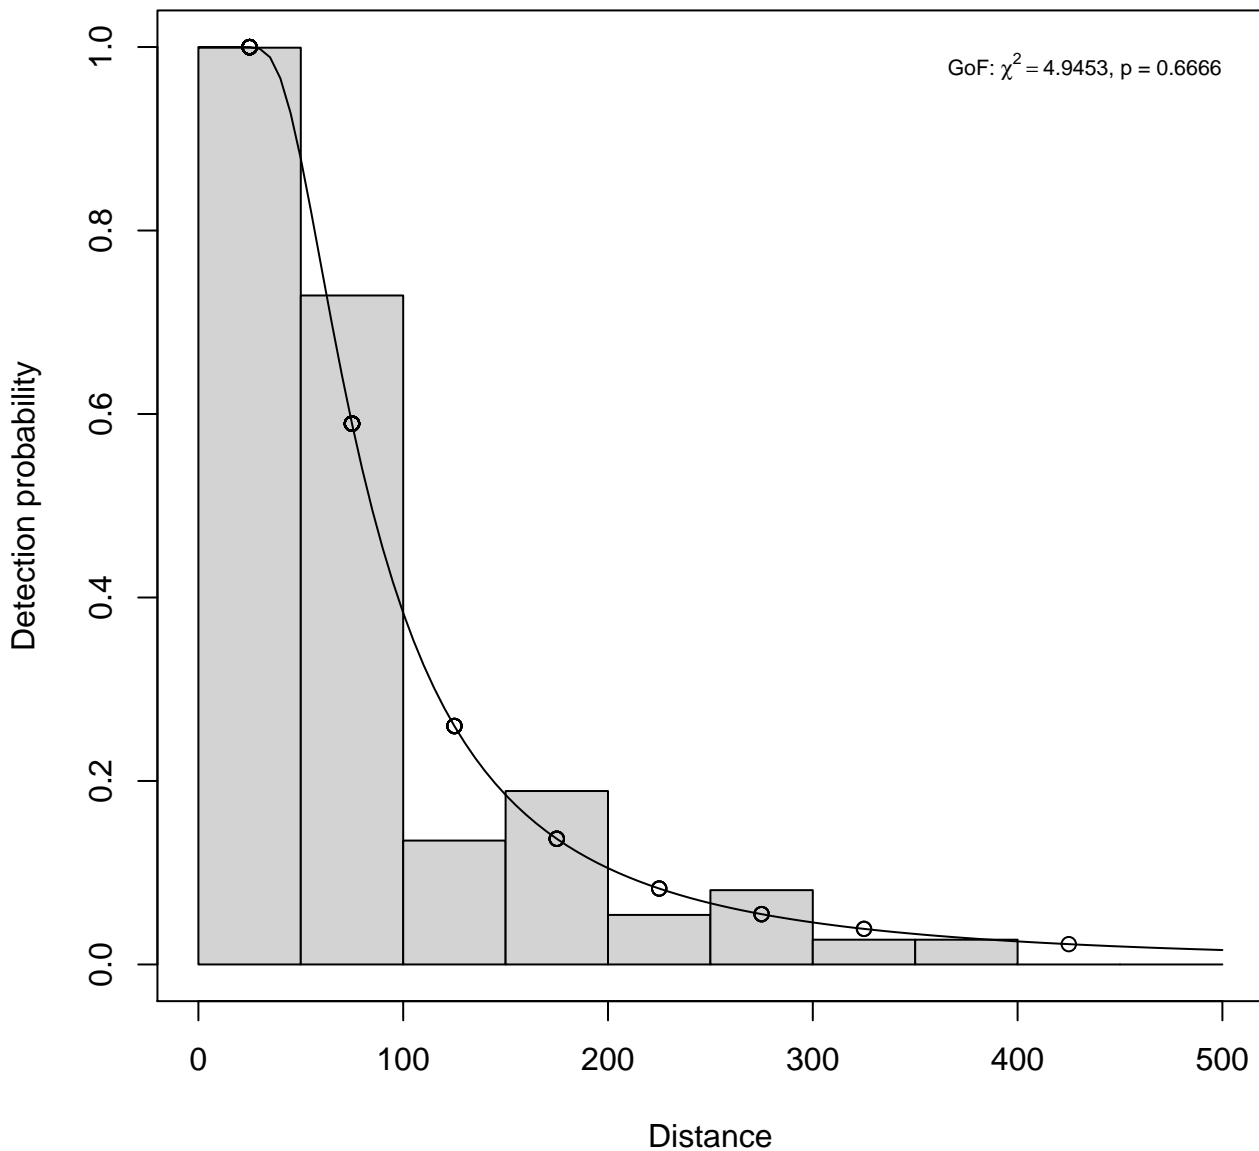

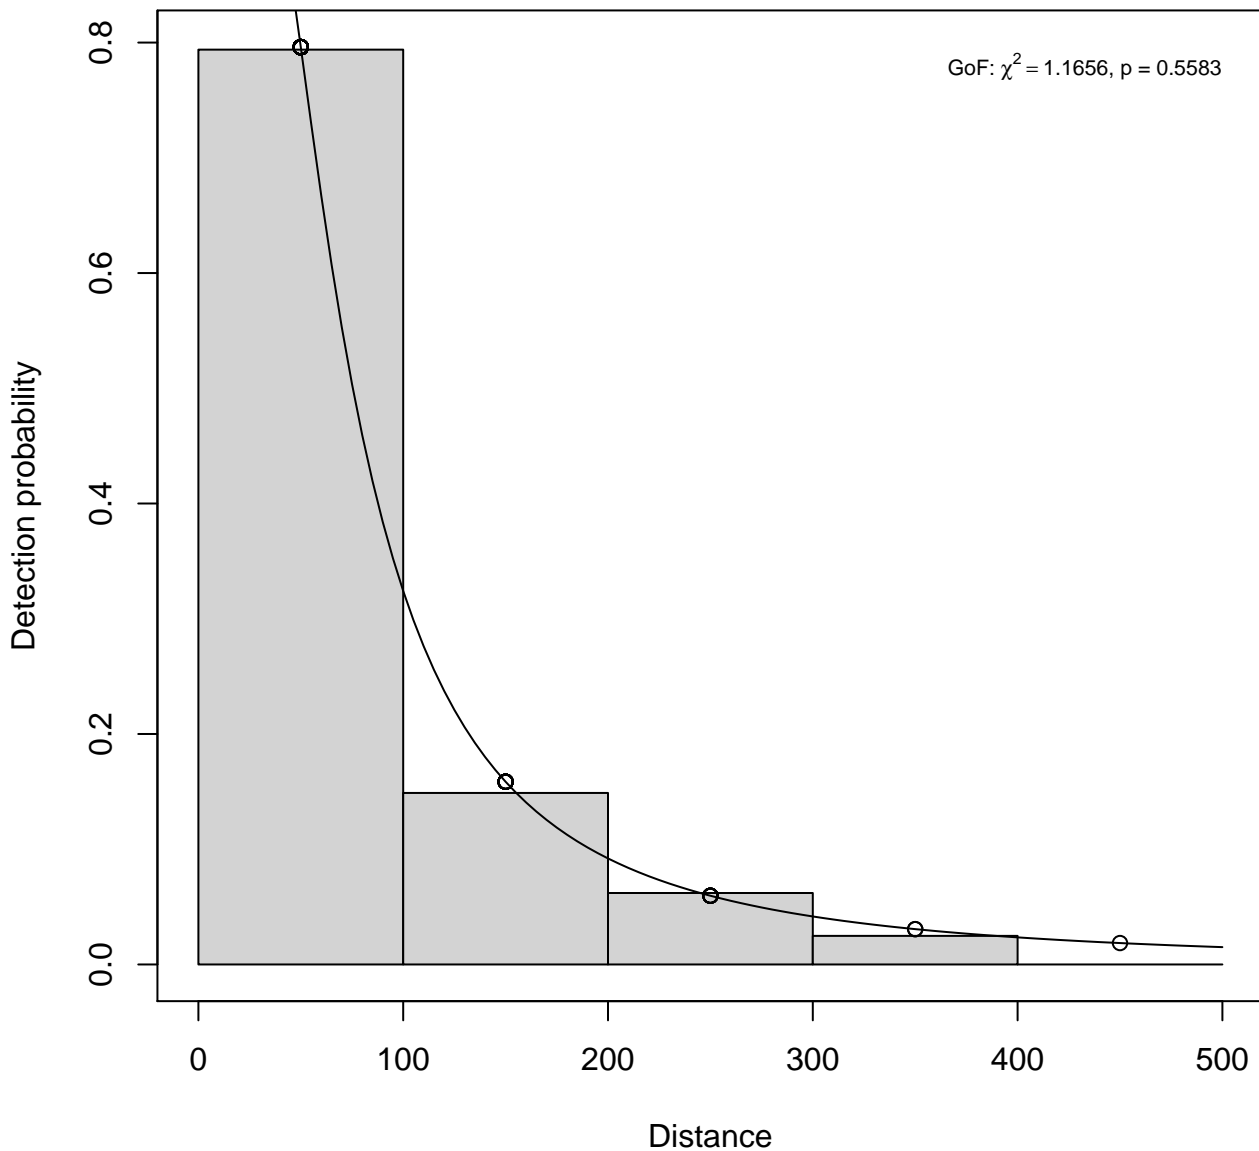

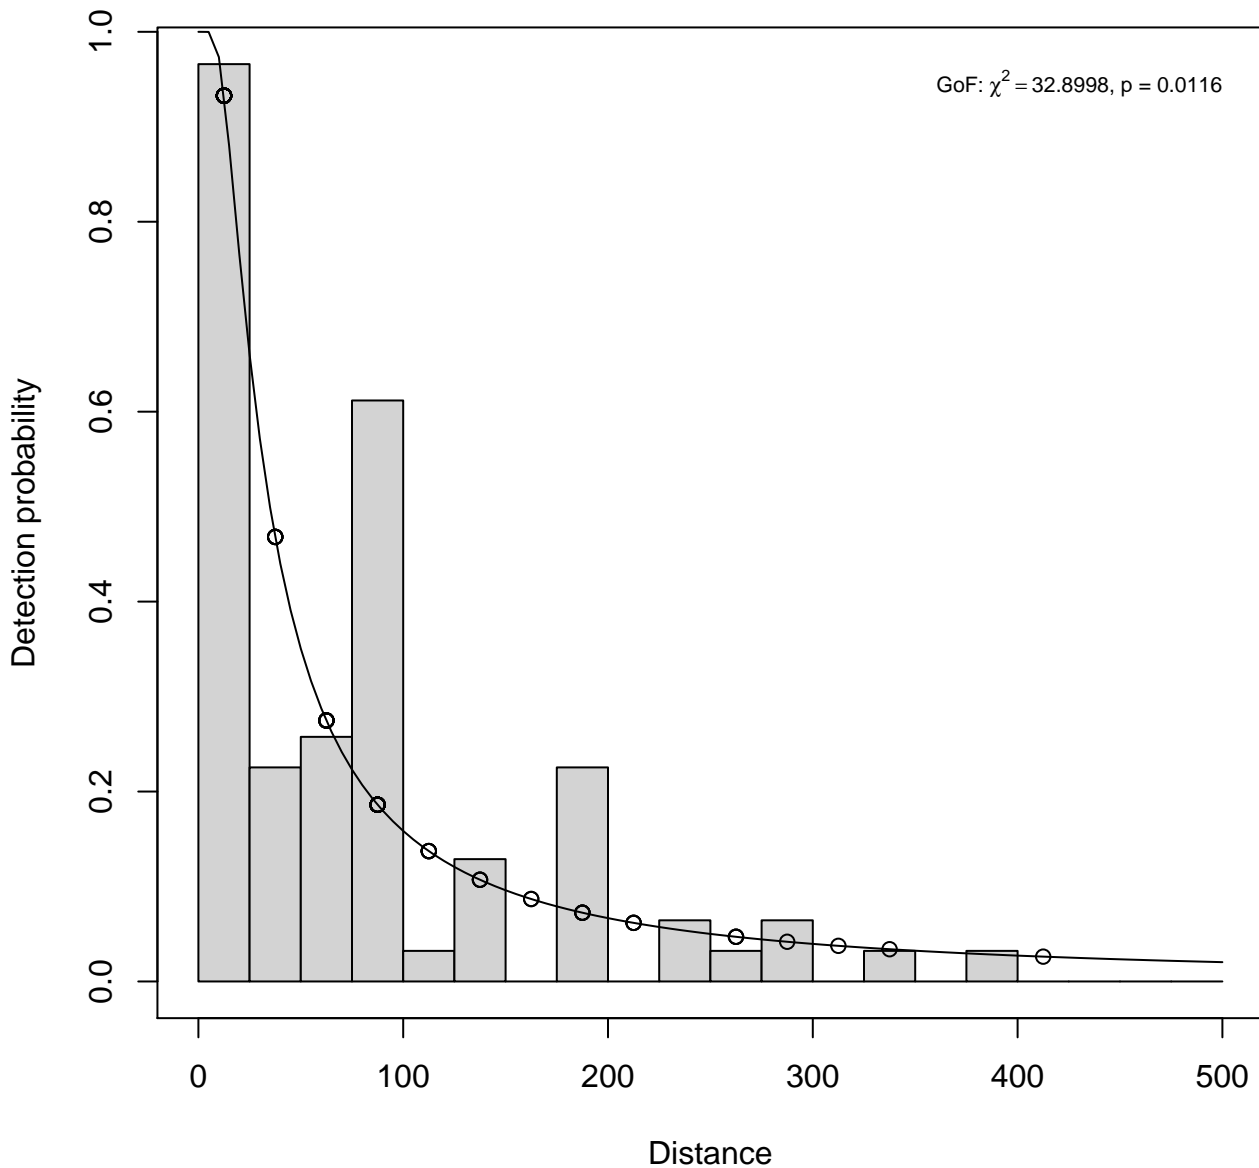

Supplement: s1 [file s1]
