# Supplementary material
Source: MDPI journal article supplement (https://www.mdpi.com/1424-2818/13/7/300)

# Loriculus beryllinus – Sri Lanka lowland rain forests – Sri Lanka

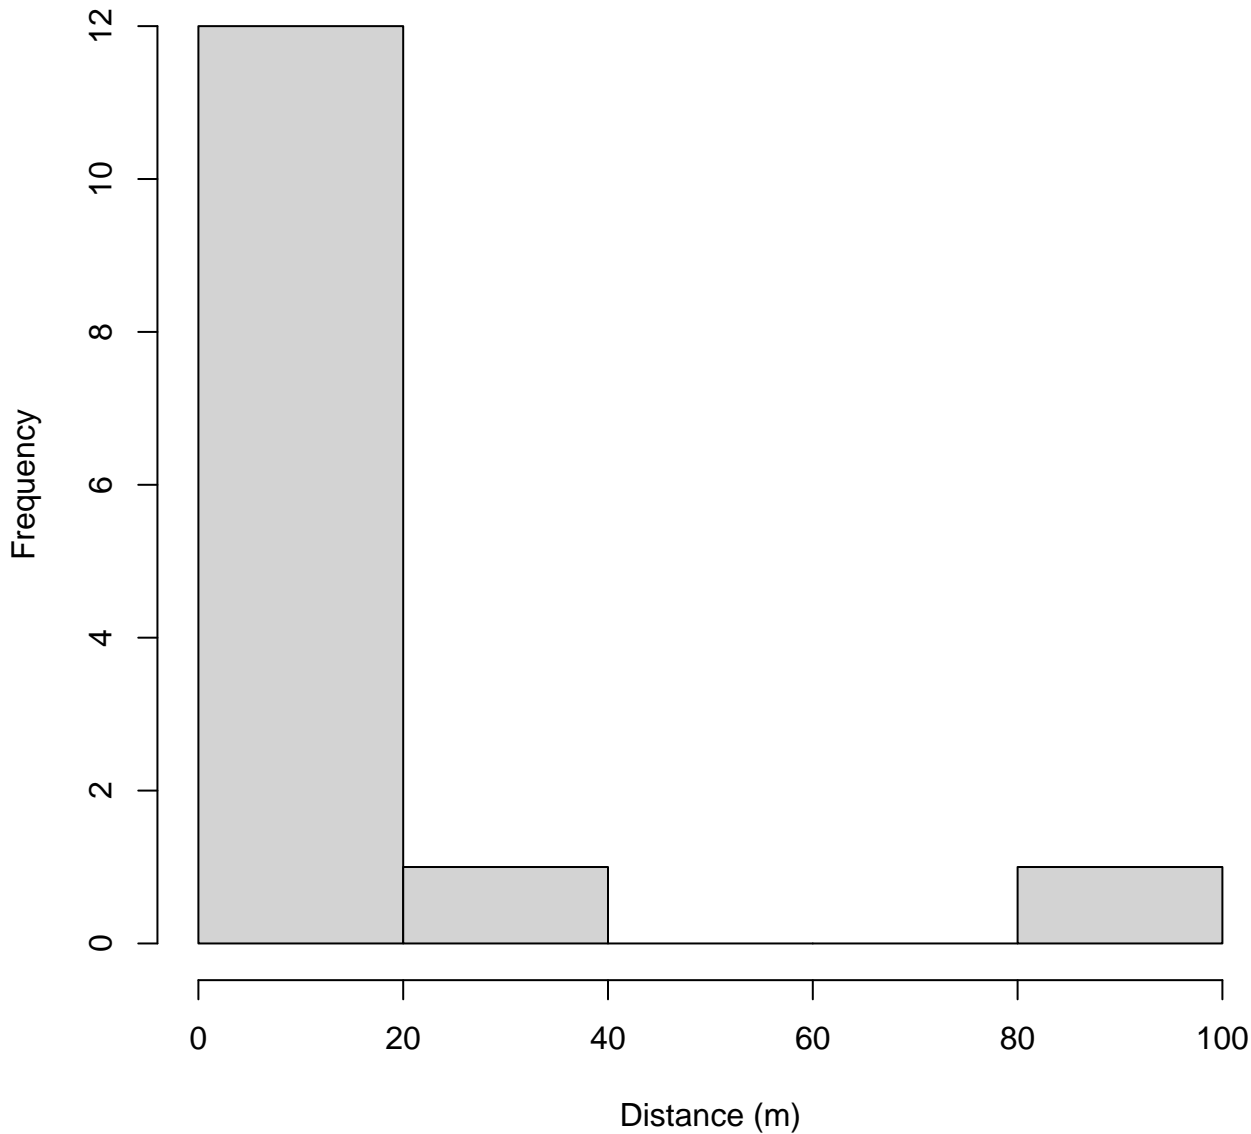

# Loriculus beryllinus – Sri Lanka lowland rain forests – Sri Lanka

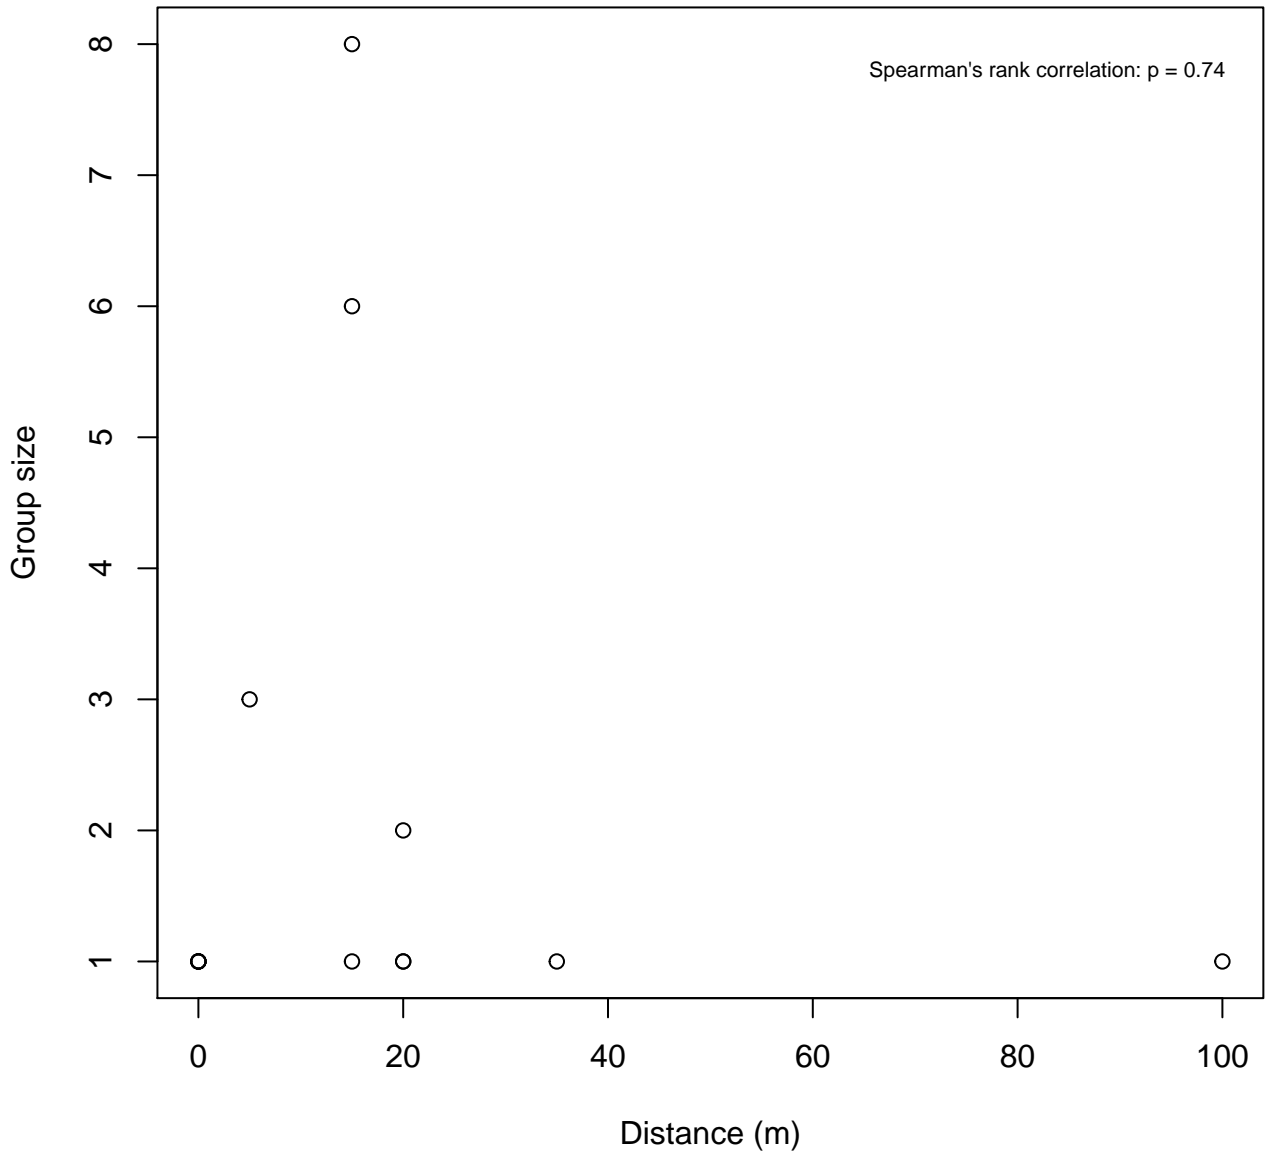

Loriculus beryllinus – Sri Lanka lowland rain forests – Sri Lanka (N = 14, key function = hn)

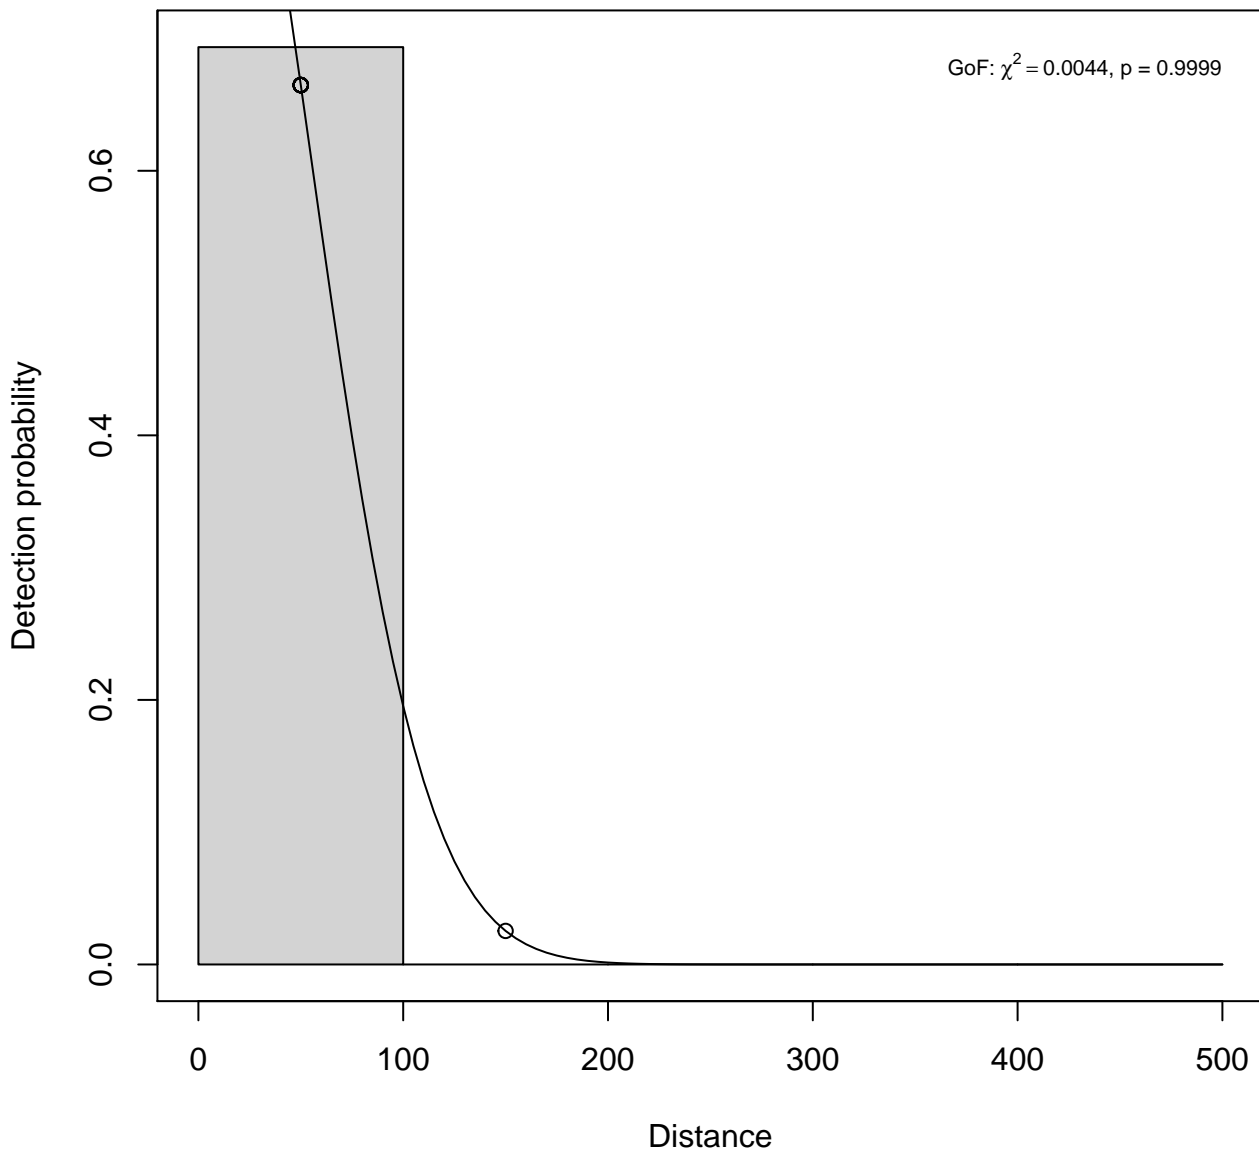

Loriculus beryllinus – Sri Lanka lowland rain forests – Sri Lanka (N = 14, key function = hr)

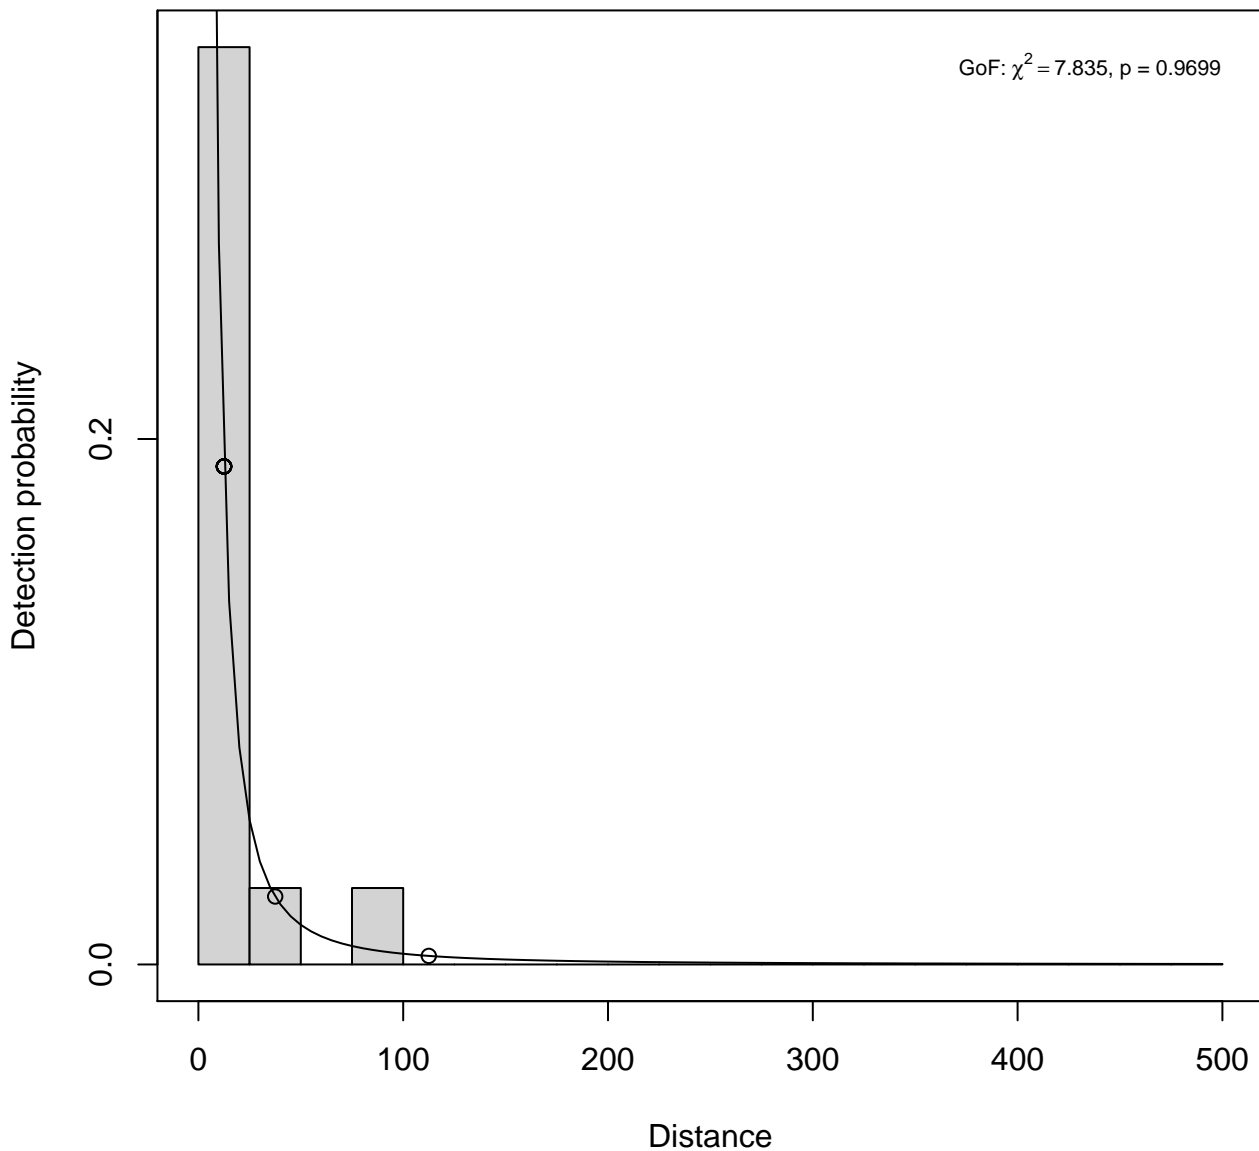

Loriculus beryllinus – Sri Lanka lowland rain forests – Sri Lanka (N = 14, key function = hr)

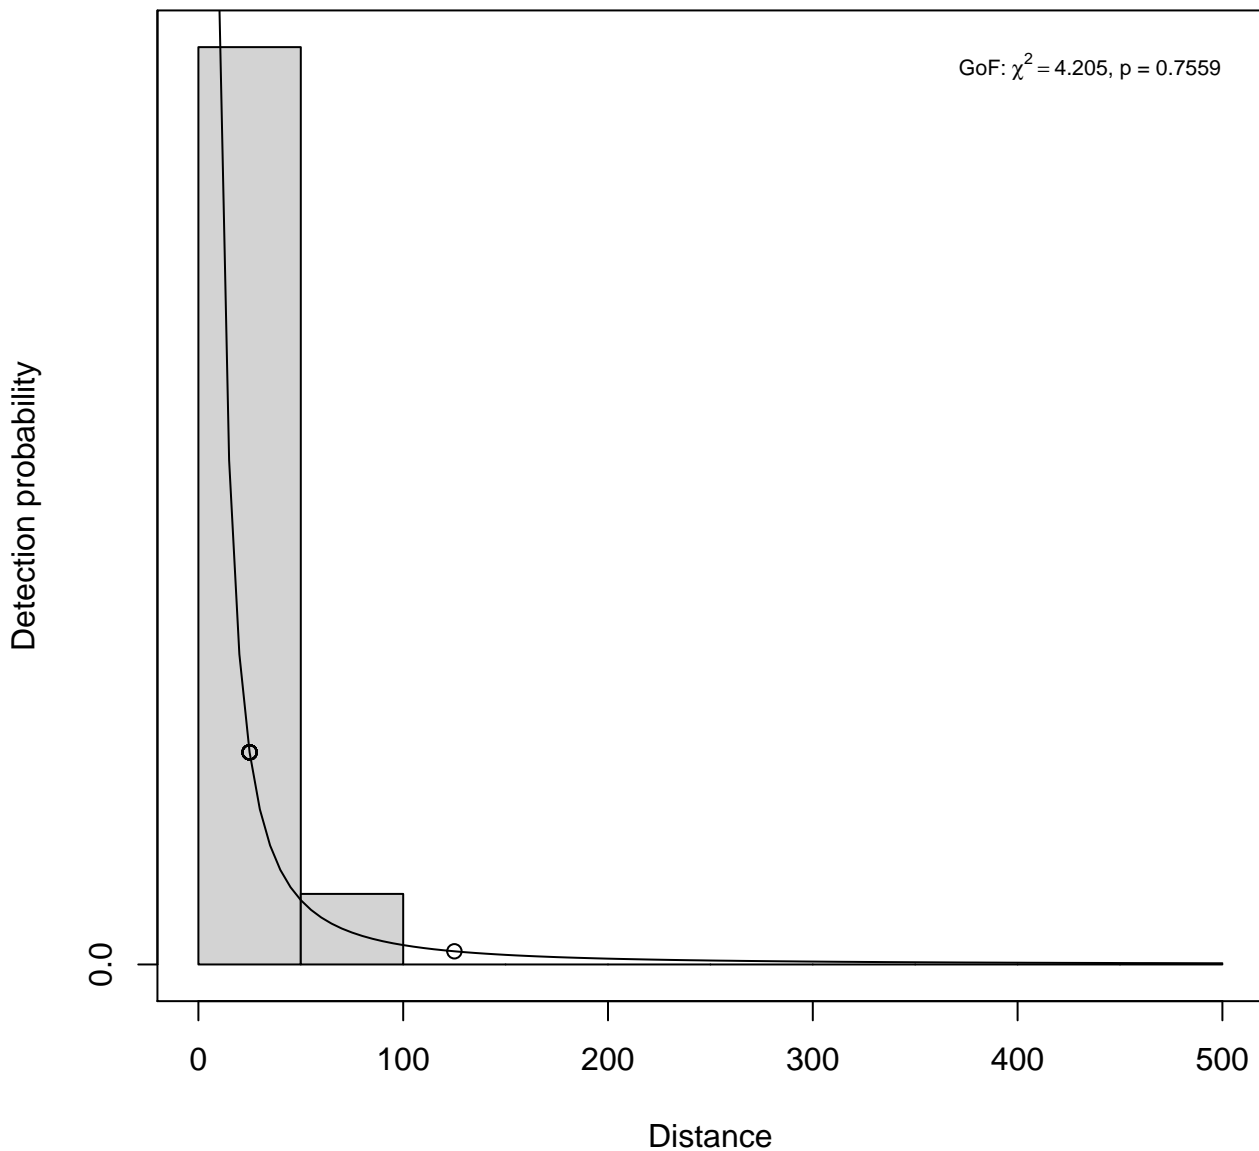

Supplement: s1 [file s1]
