# Supplementary material
Source: MDPI journal article supplement (https://www.mdpi.com/1424-2818/13/7/300)

# ***Thectocercus acuticaudatus* – Humid Chaco – Argentina**

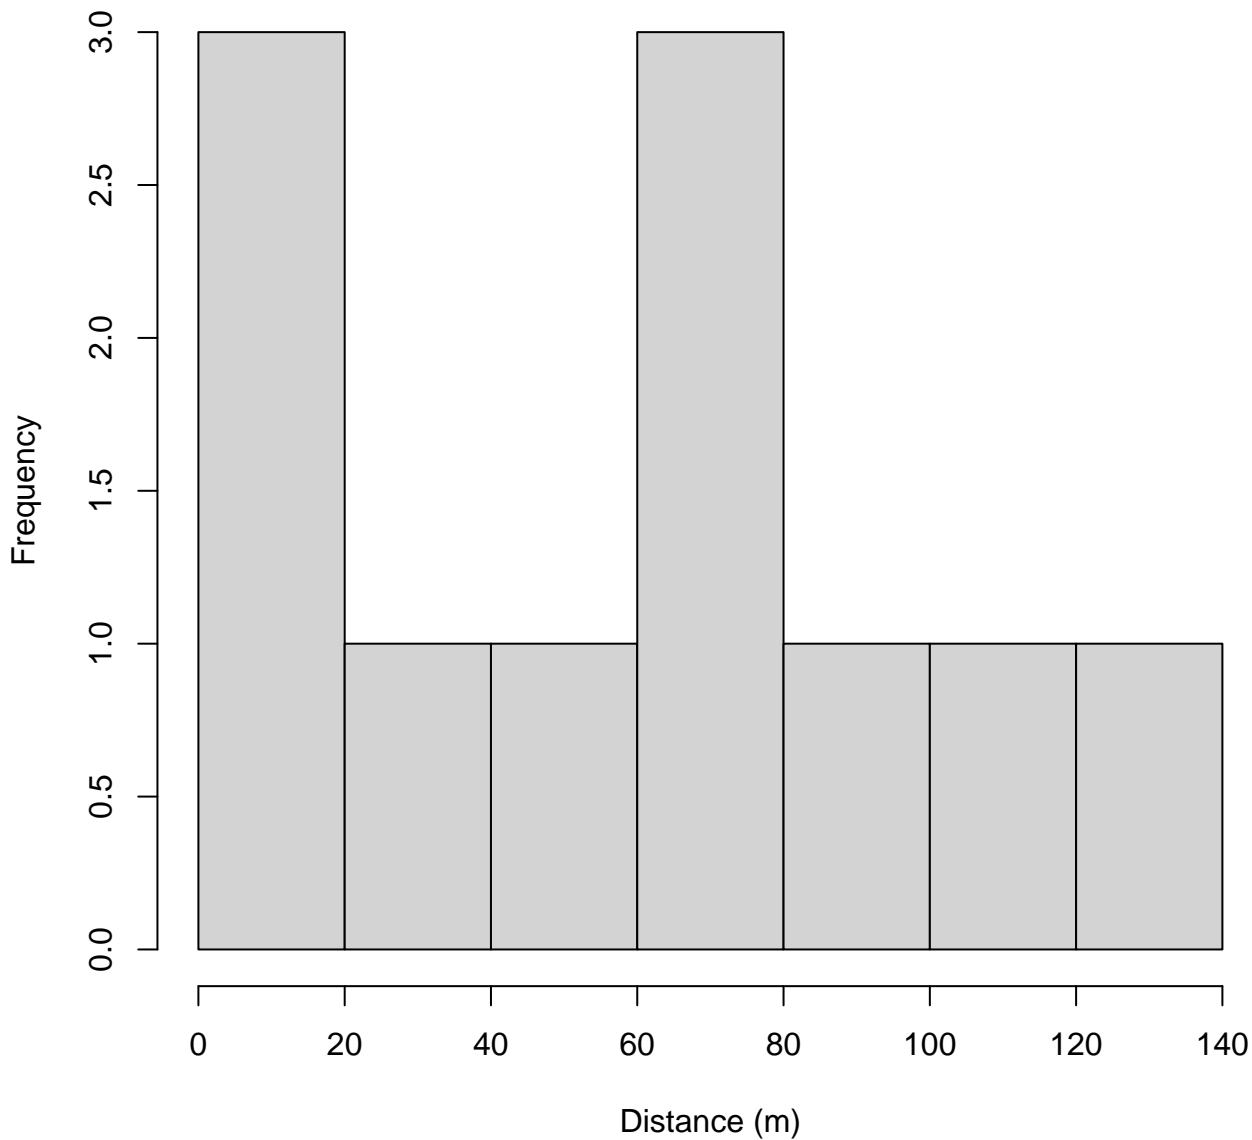

# ***Thectocercus acuticaudatus* – Humid Chaco – Argentina**

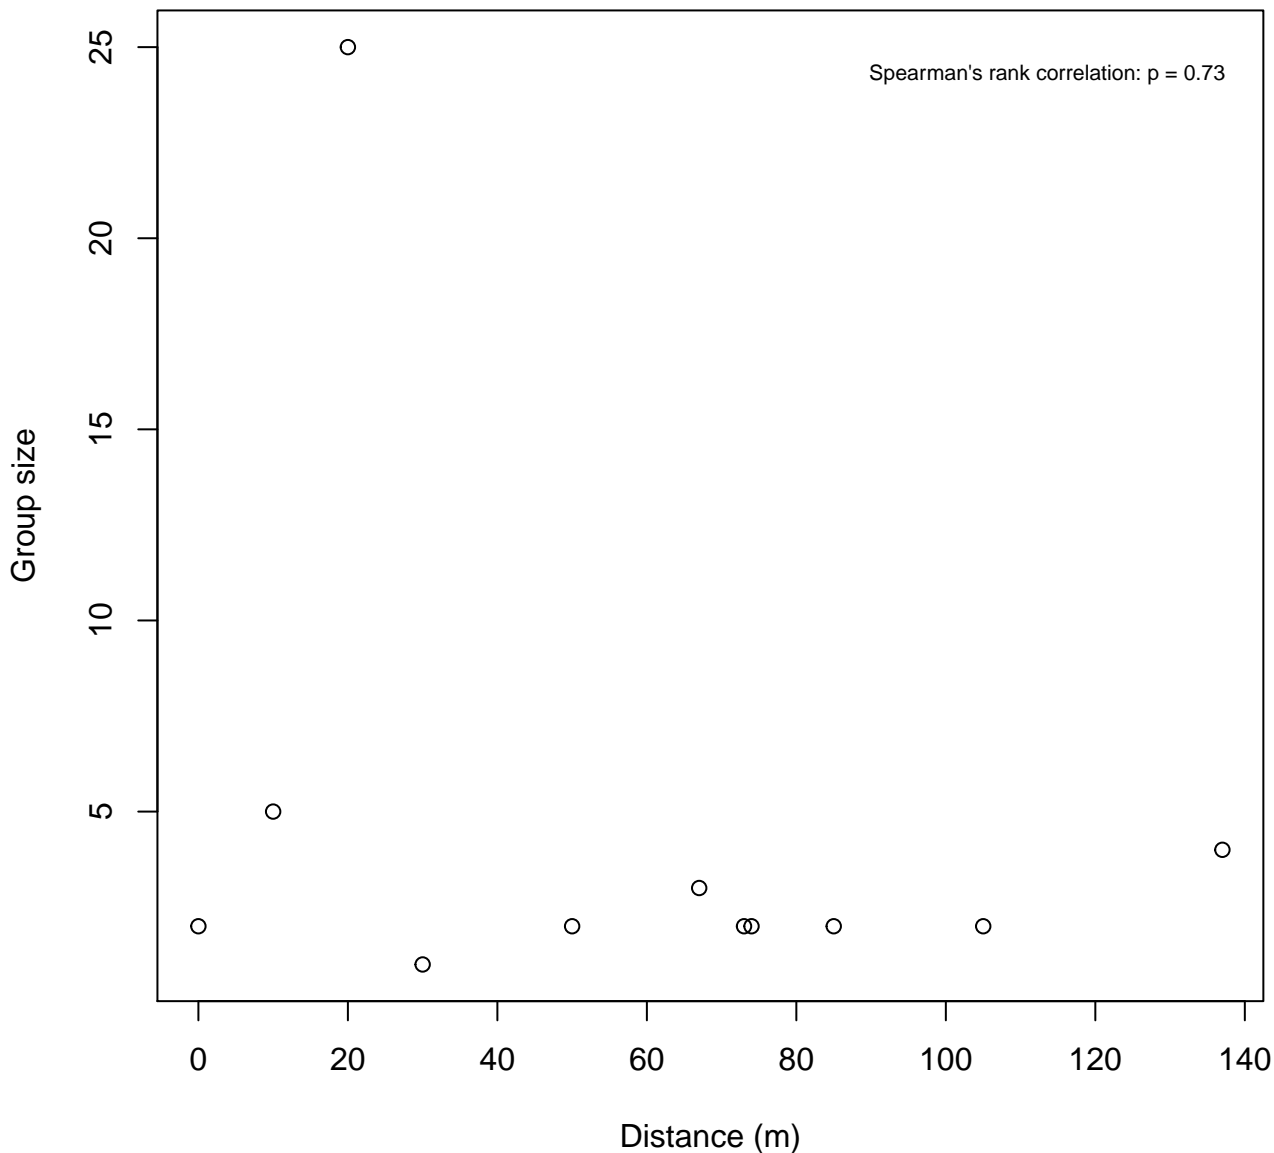

*Thectocercus acuticaudatus* – Humid Chaco – Argentina (N = 11, key function = hn)

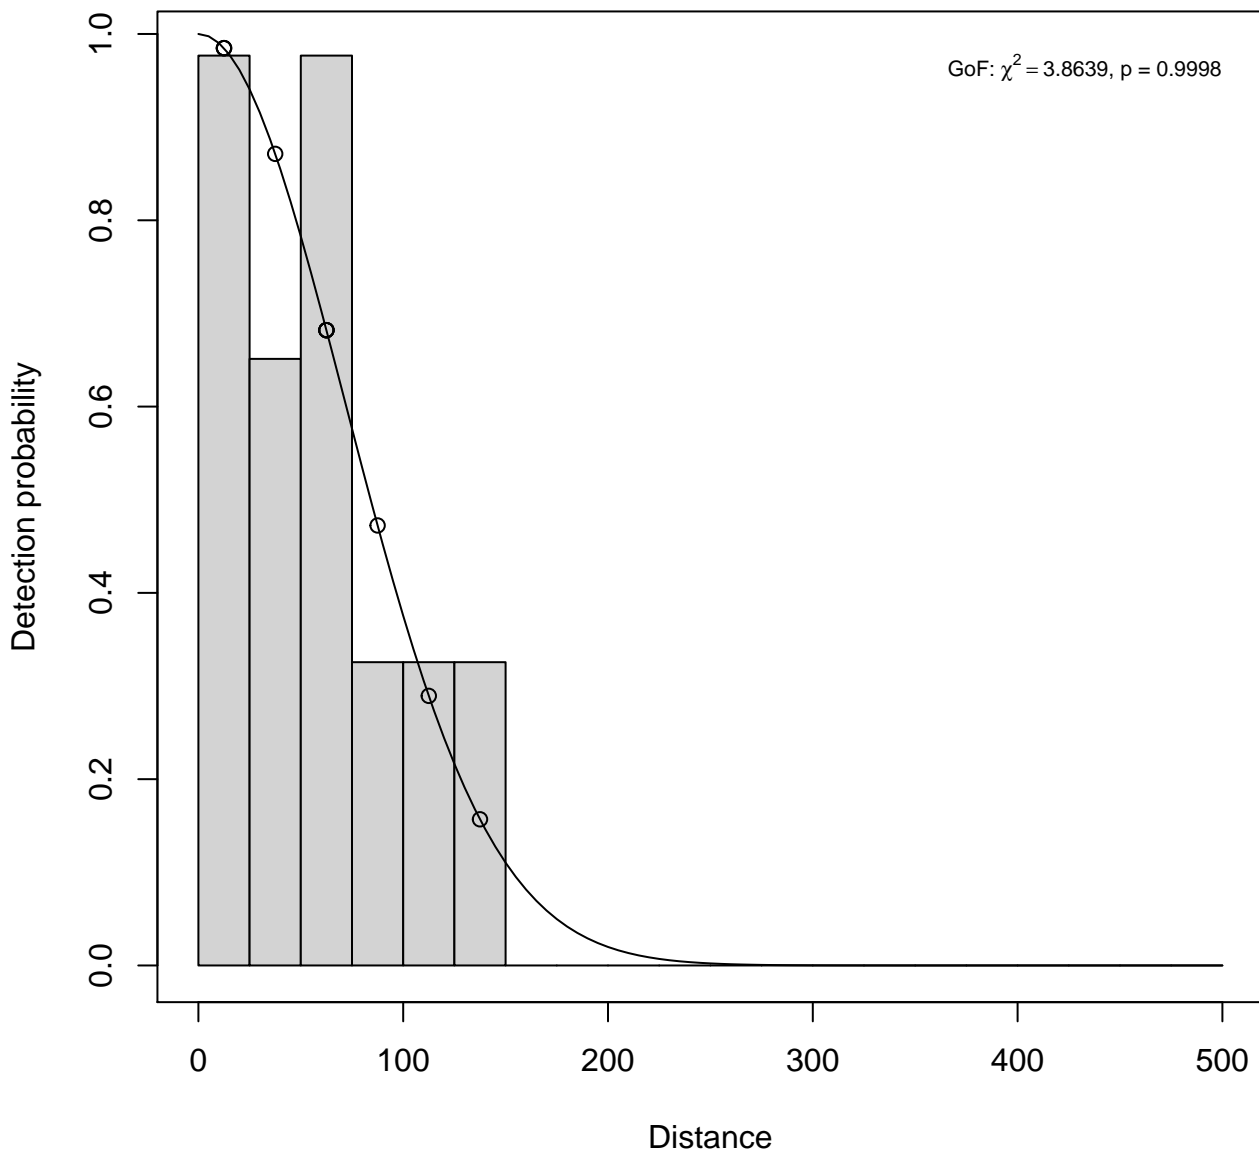

*Thectocercus acuticaudatus* – Humid Chaco – Argentina (N = 11, key function = hn)

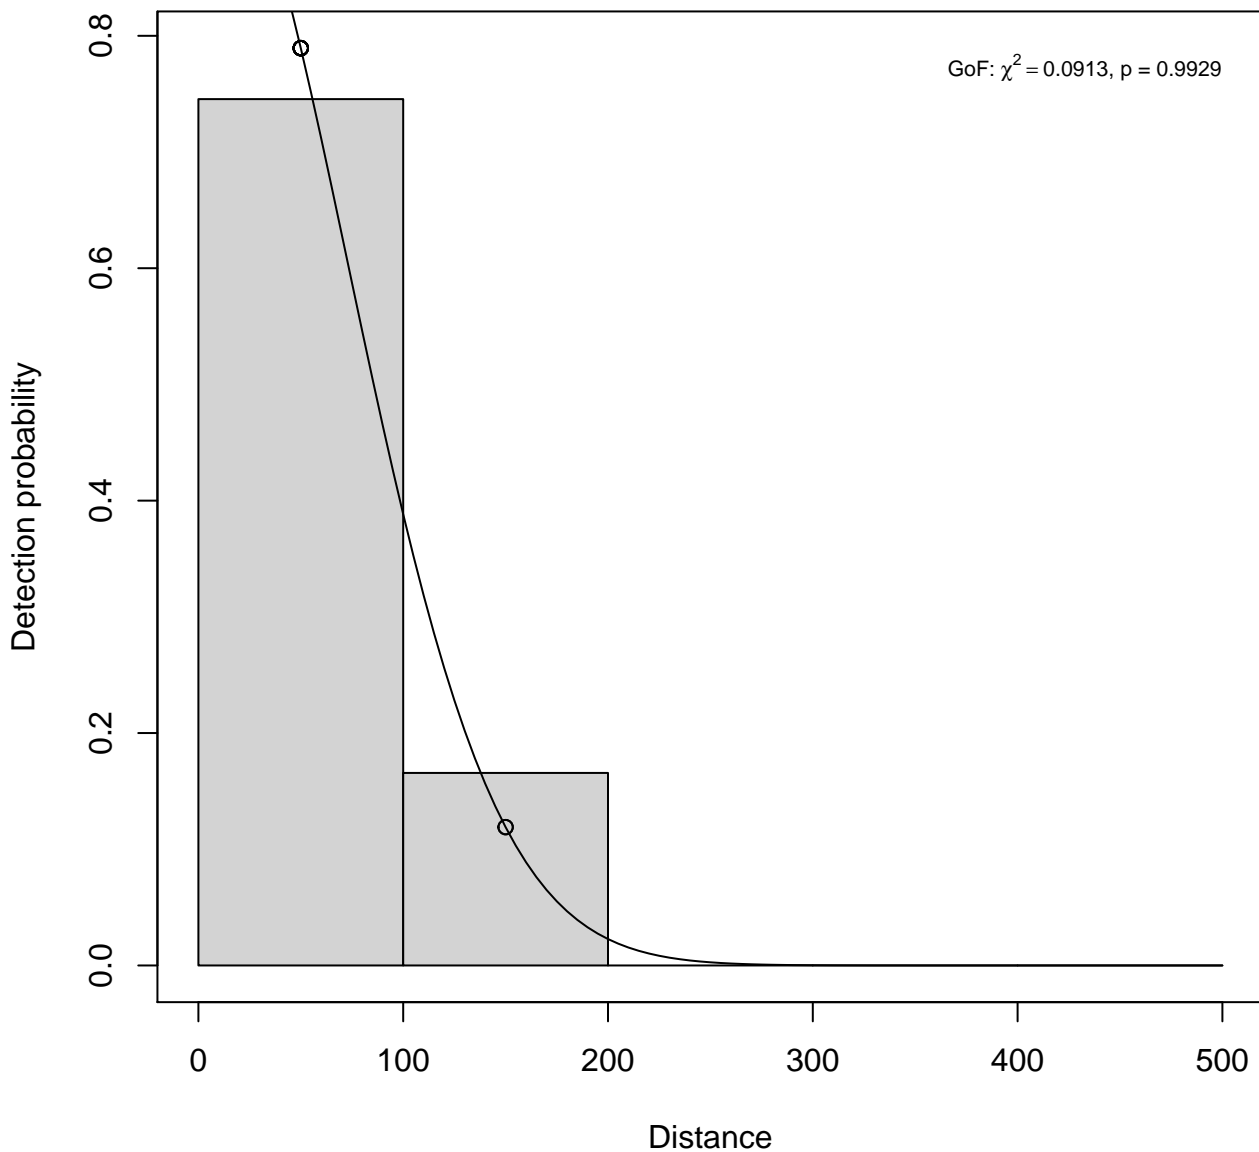

*Thectocercus acuticaudatus* – Humid Chaco – Argentina (N = 11, key function = hn)

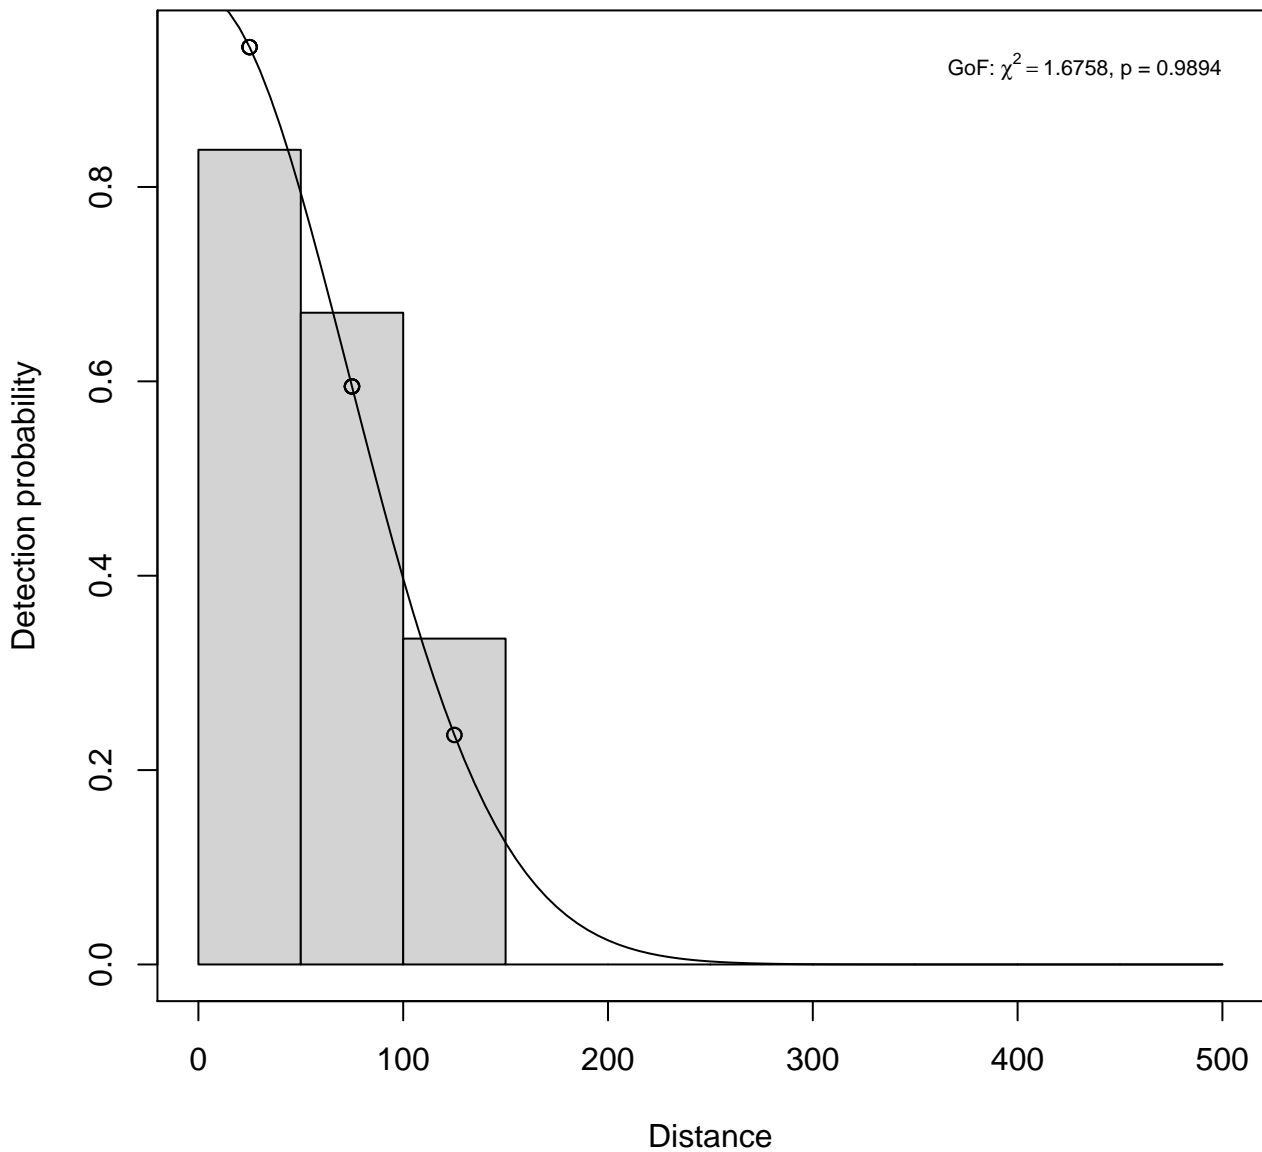

Supplement: s1 [file s1]
