# Supplementary material
Source: MDPI journal article supplement (https://www.mdpi.com/1424-2818/13/7/300)

# **Anodorhynchus hyacinthinus – Cerrado – Brazil**

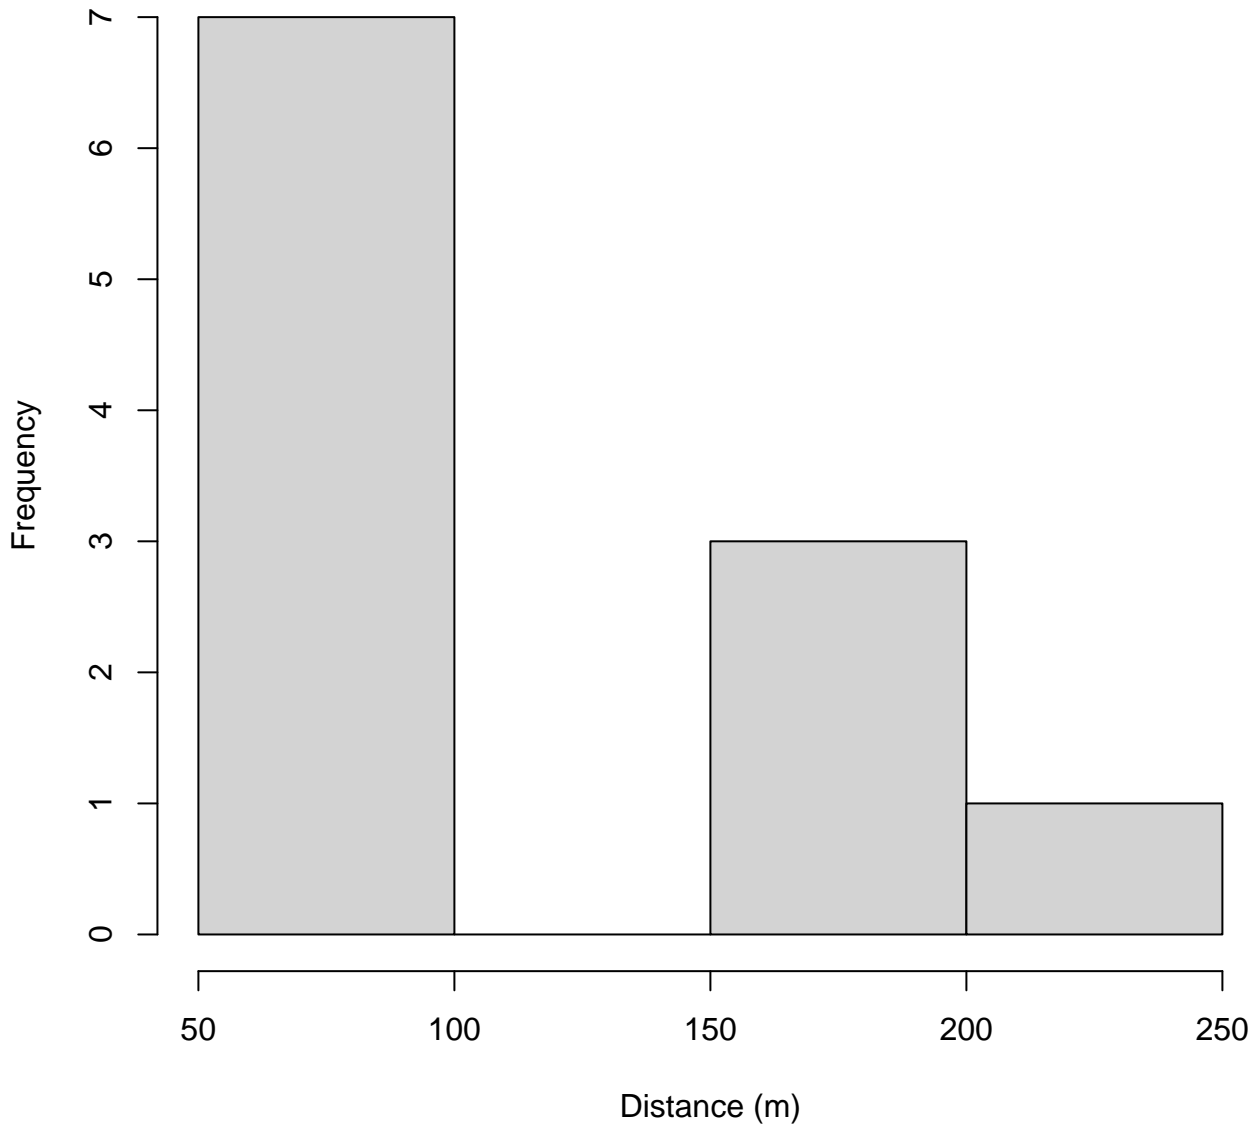

# Anodorhynchus hyacinthinus – Cerrado – Brazil

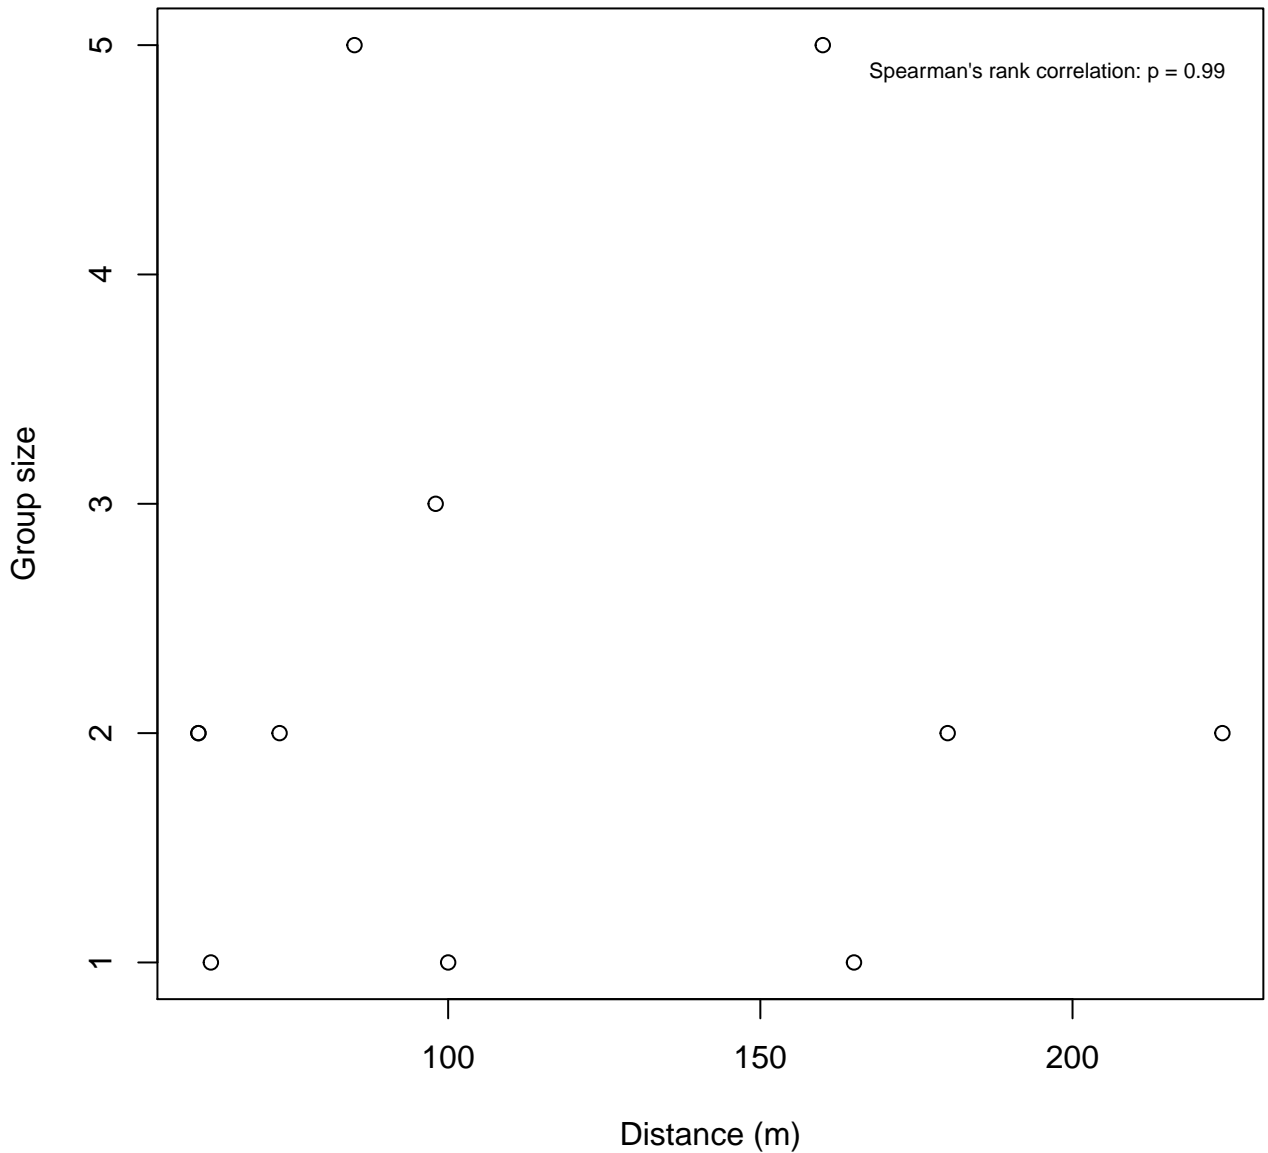

Anodorhynchus hyacinthinus – Cerrado – Brazil (N = 11, key function = hn)

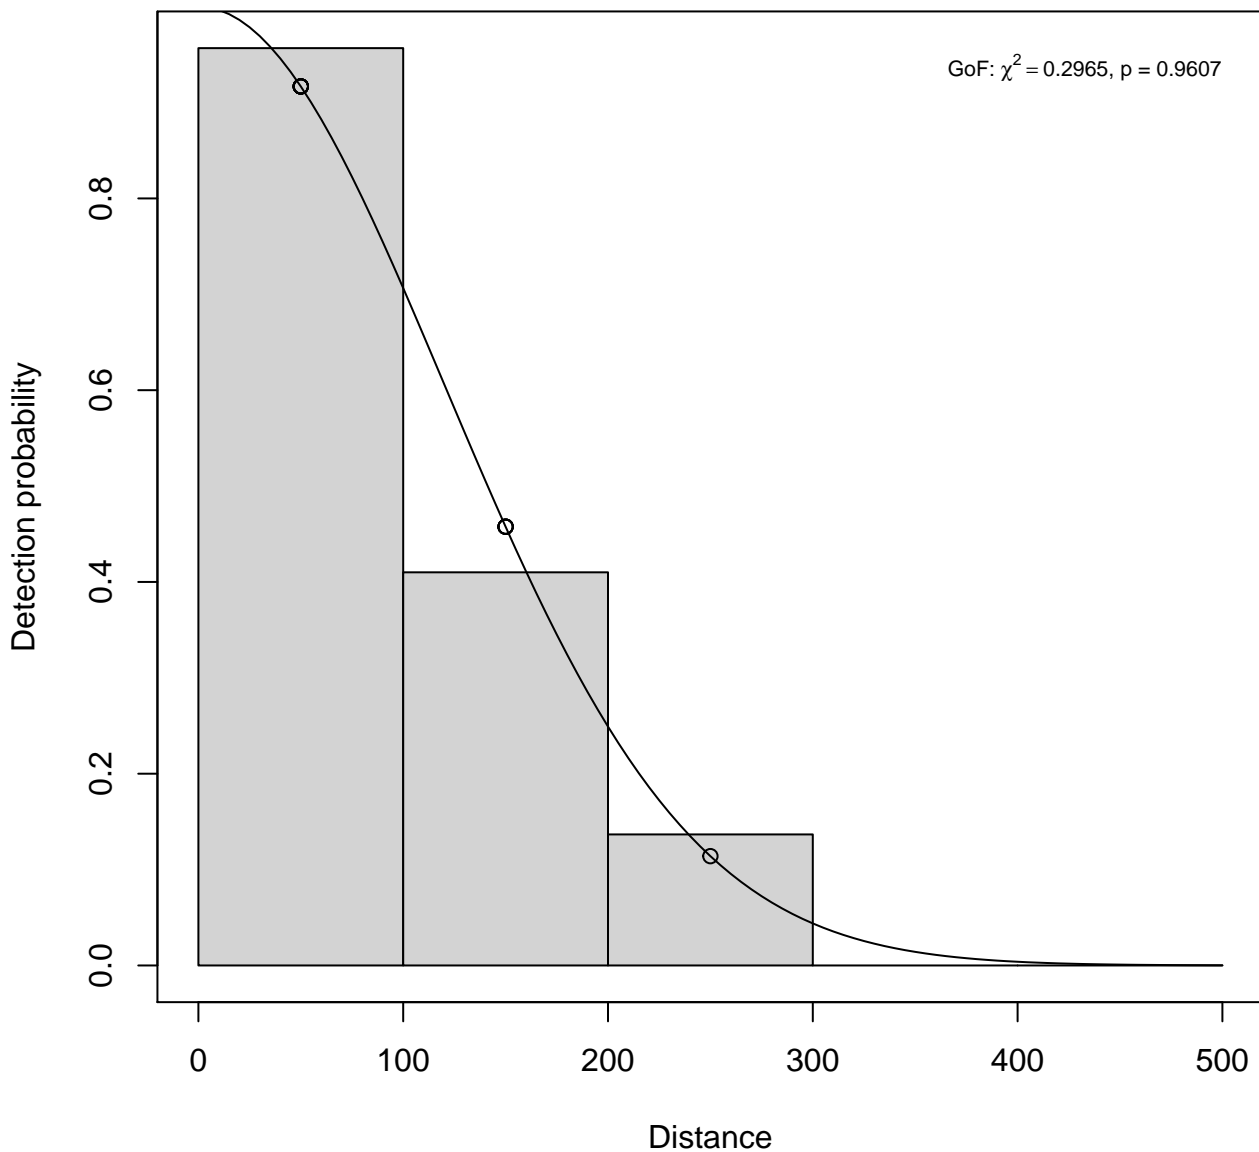

Anodorhynchus hyacinthinus – Cerrado – Brazil (N = 11, key function = hr)

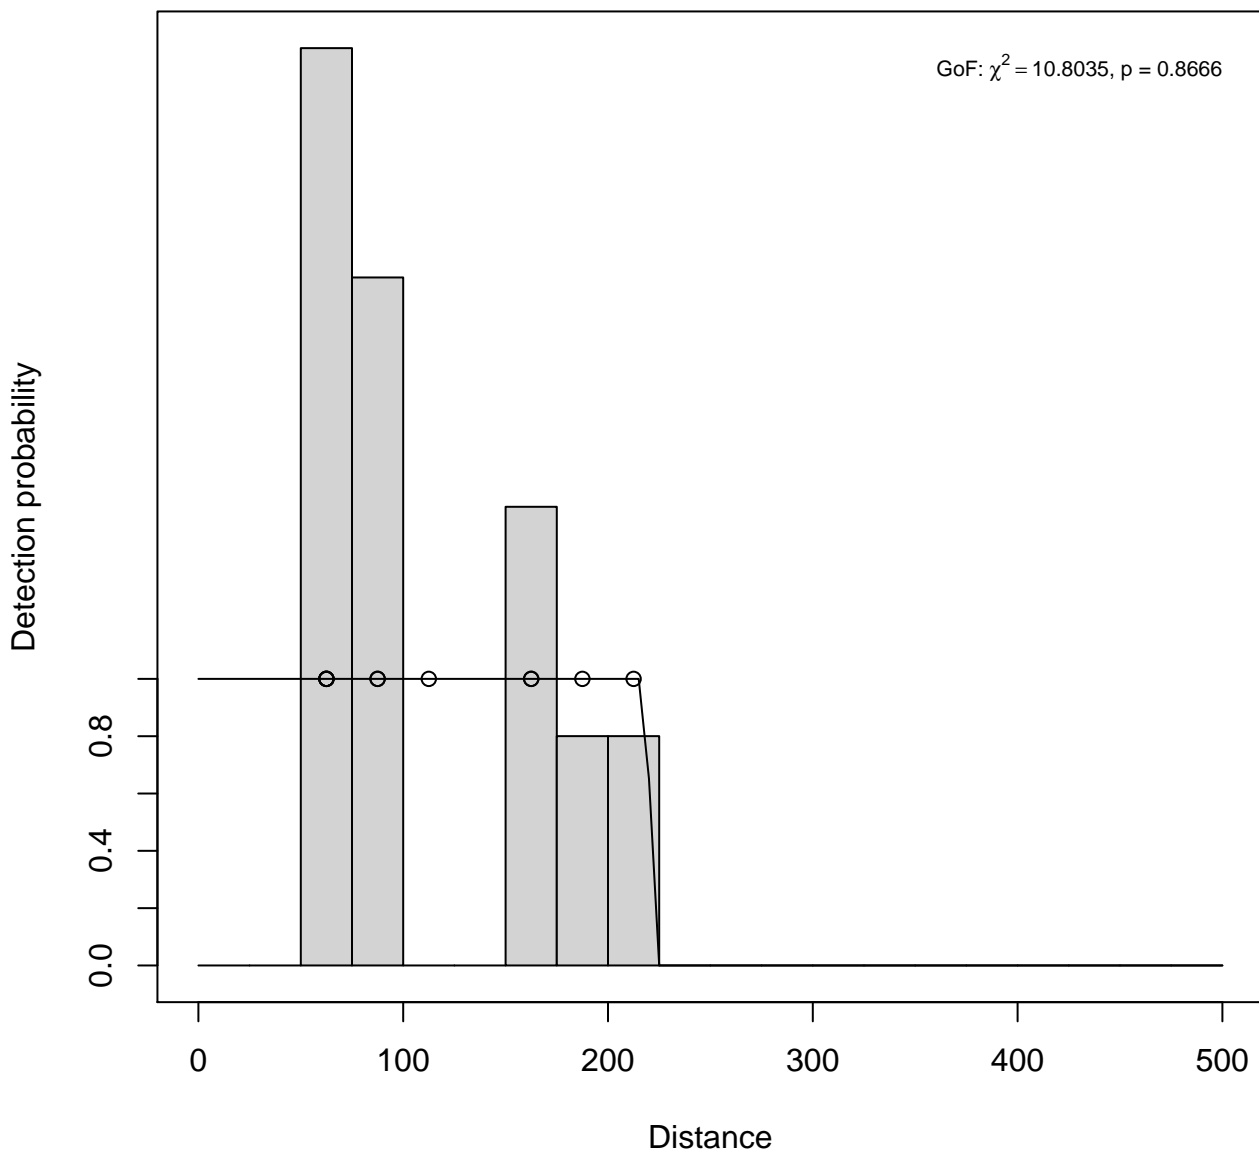

Anodorhynchus hyacinthinus – Cerrado – Brazil (N = 11, key function = hn)

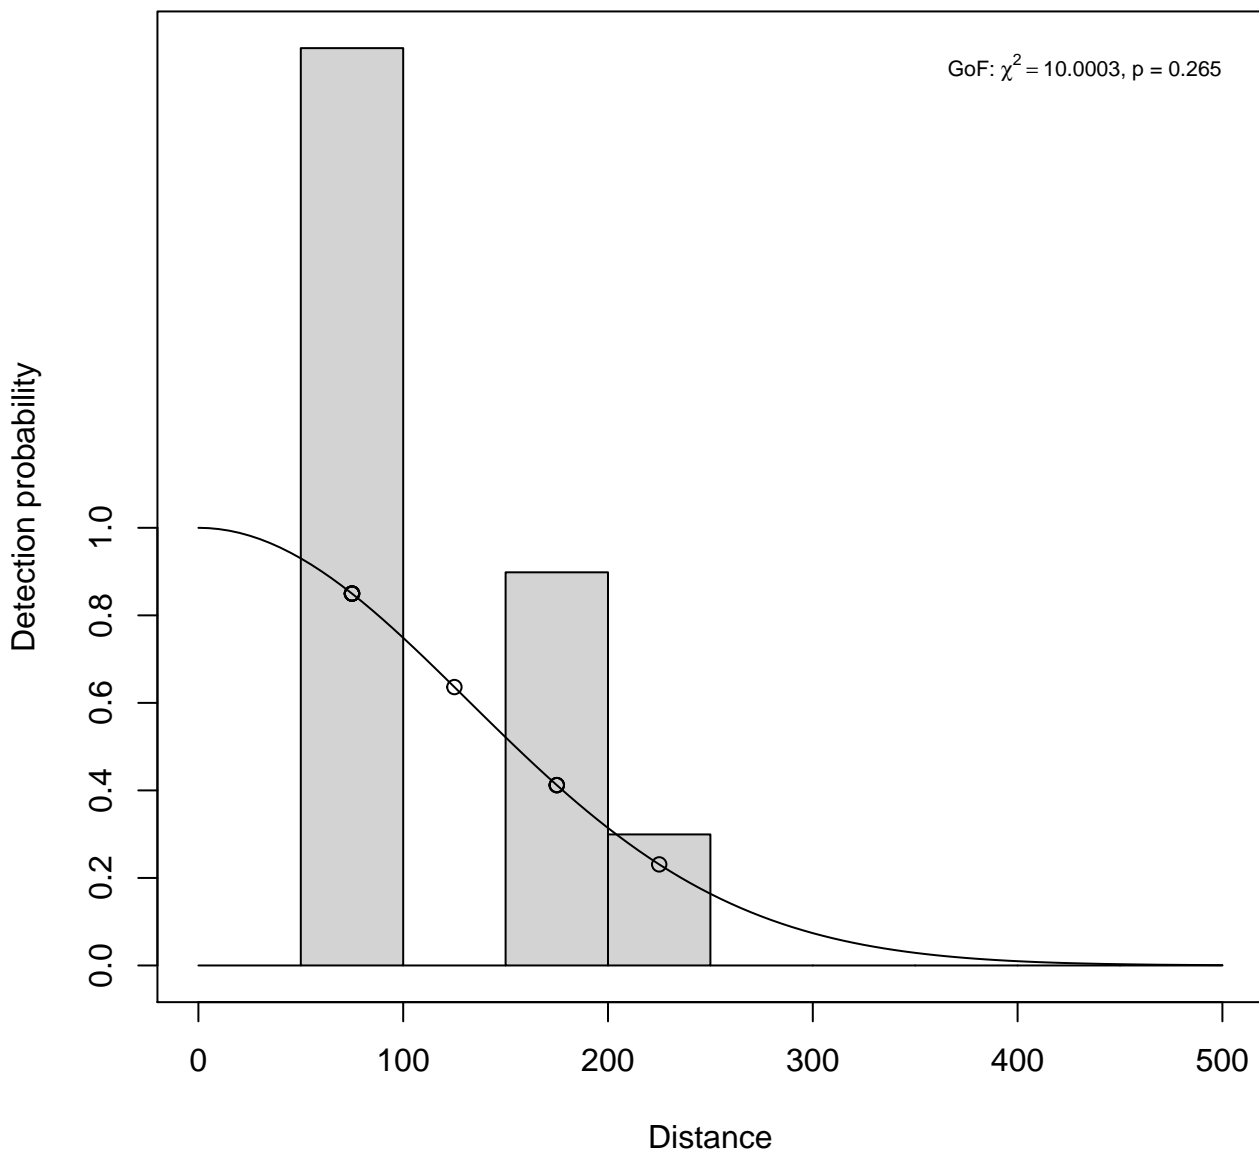

Supplement: s1 [file s1]
