# Supplementary material
Source: MDPI journal article supplement (https://www.mdpi.com/1424-2818/13/7/300)

# Pionus chalcopterus – Cauca Valley montane forests – Colombia

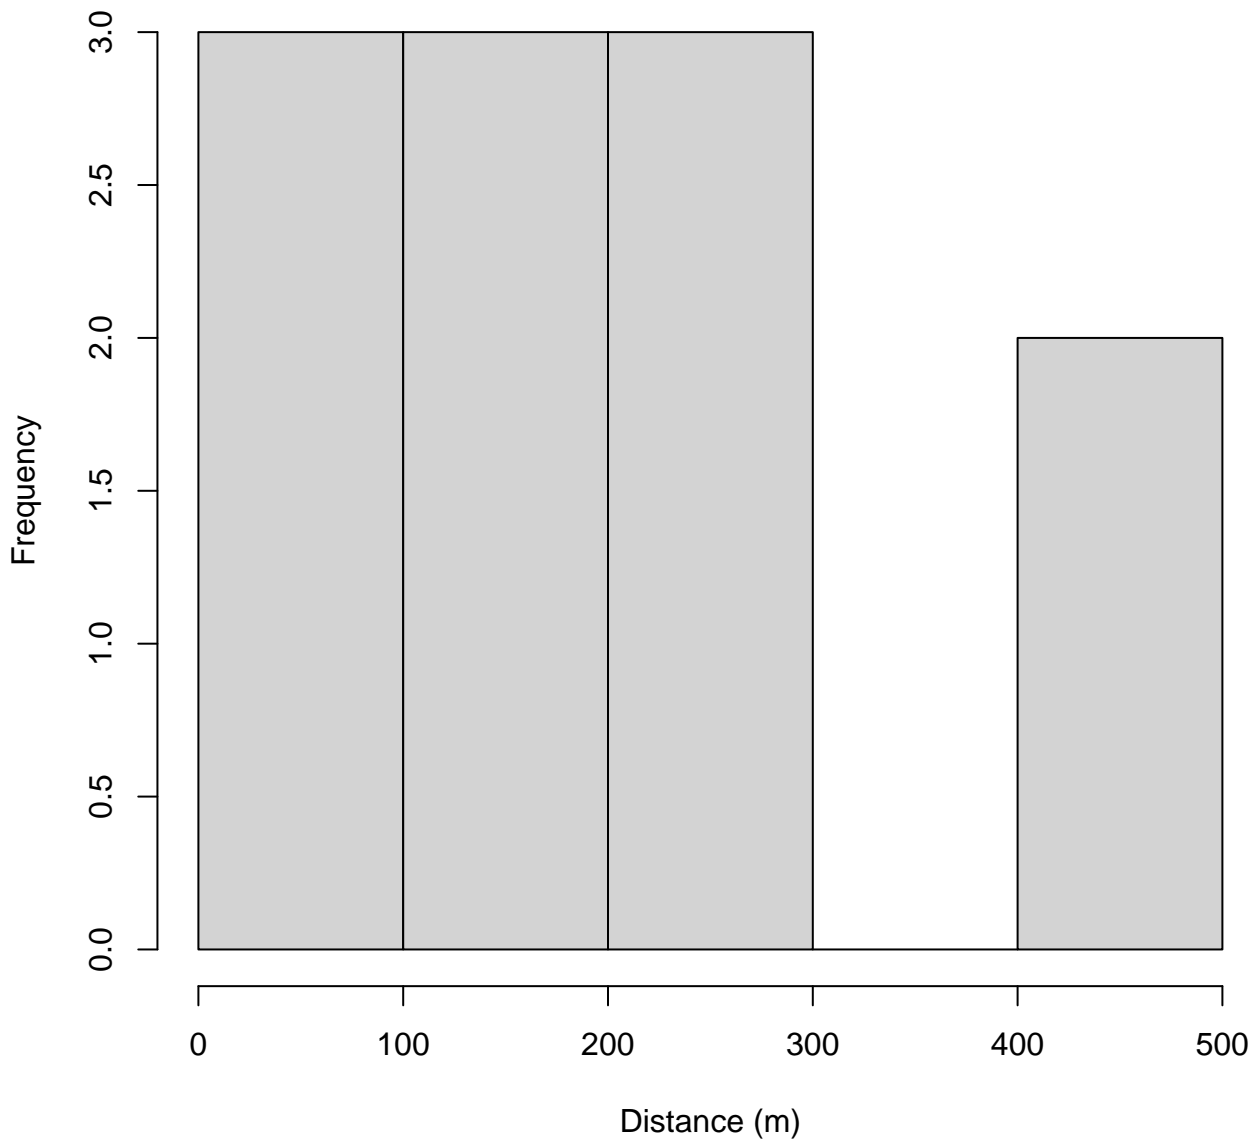

# Pionus chalcopterus – Cauca Valley montane forests – Colombia

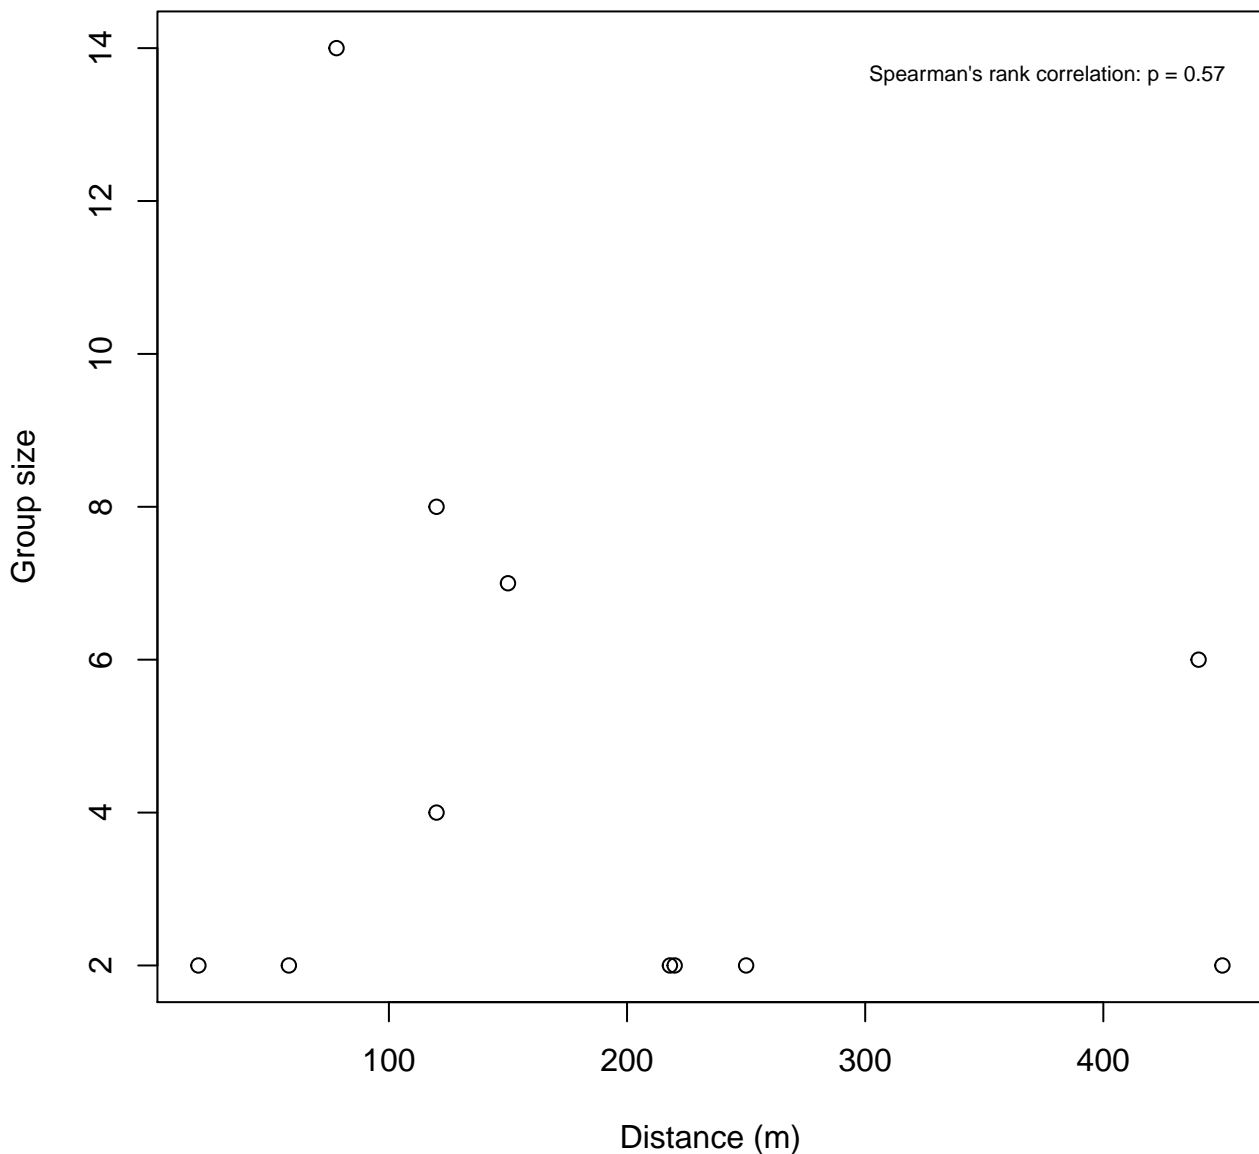

*Pionus chalcopterus* – Cauca Valley montane forests – Colombia (N = 11, key function = unif)

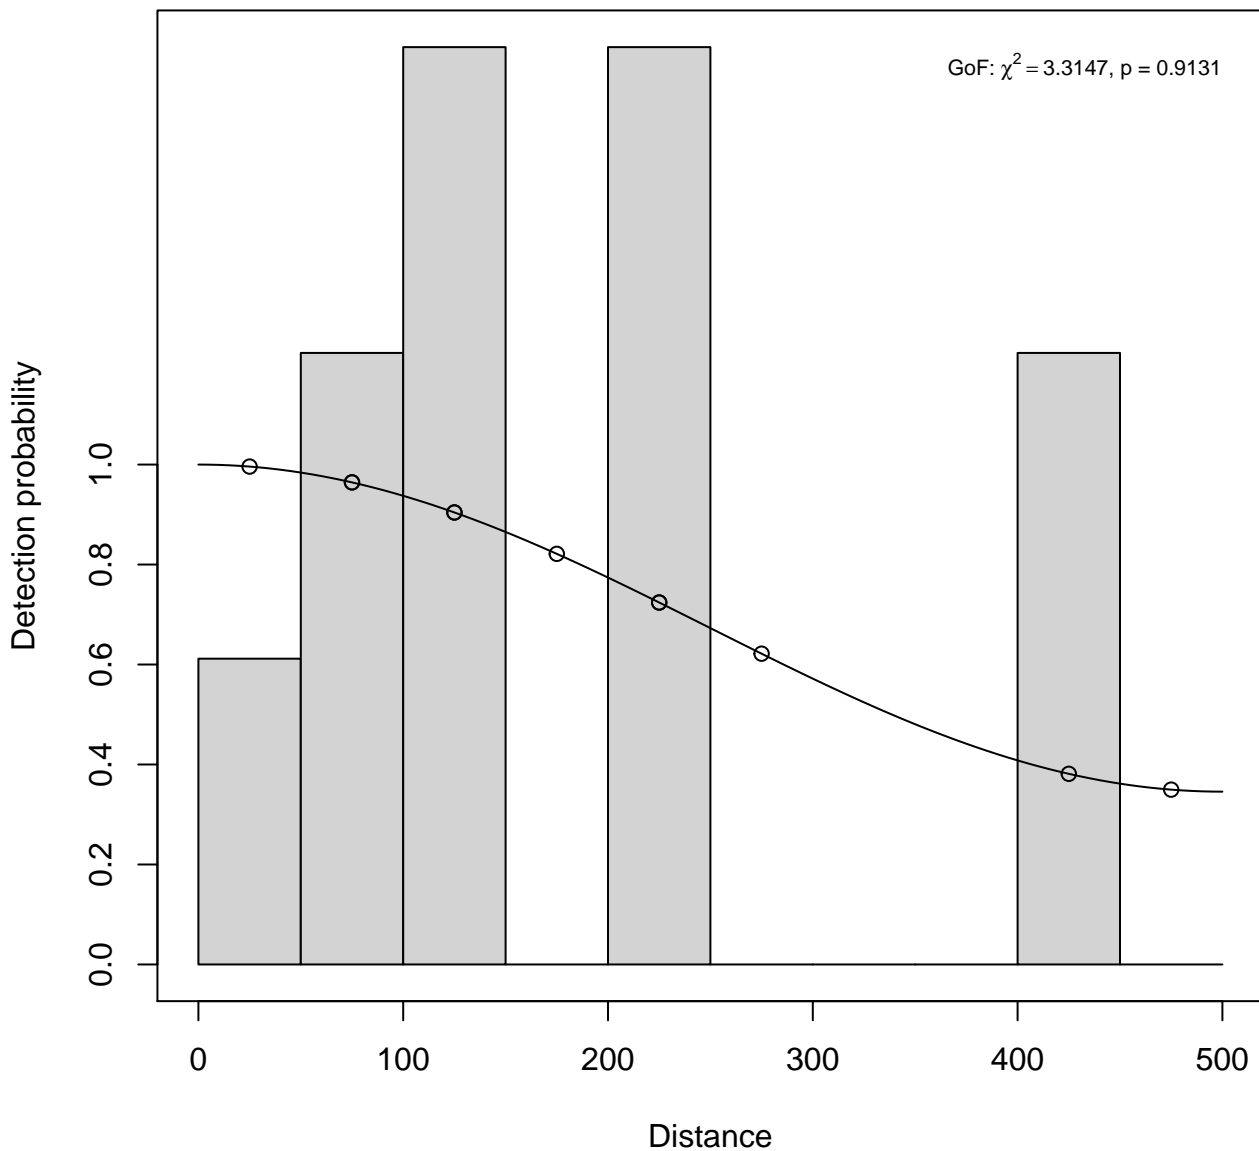

Pionus chalcopterus – Cauca Valley montane forests – Colombia (N = 11, key function = unif)

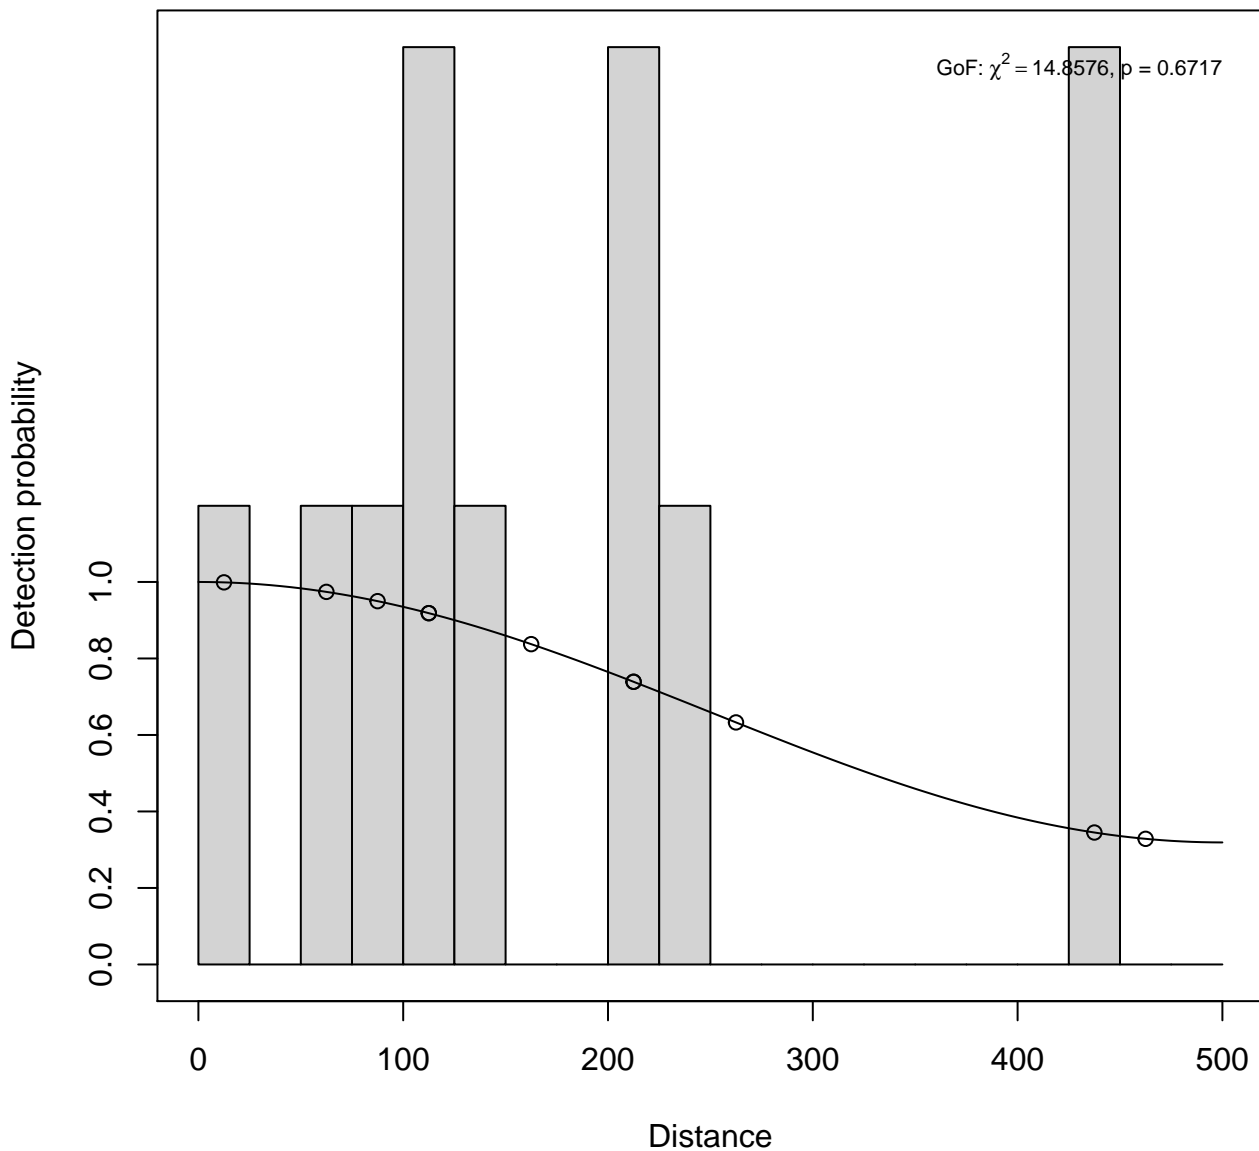

*Pionus chalcopterus* – Cauca Valley montane forests – Colombia (N = 11, key function = unif)

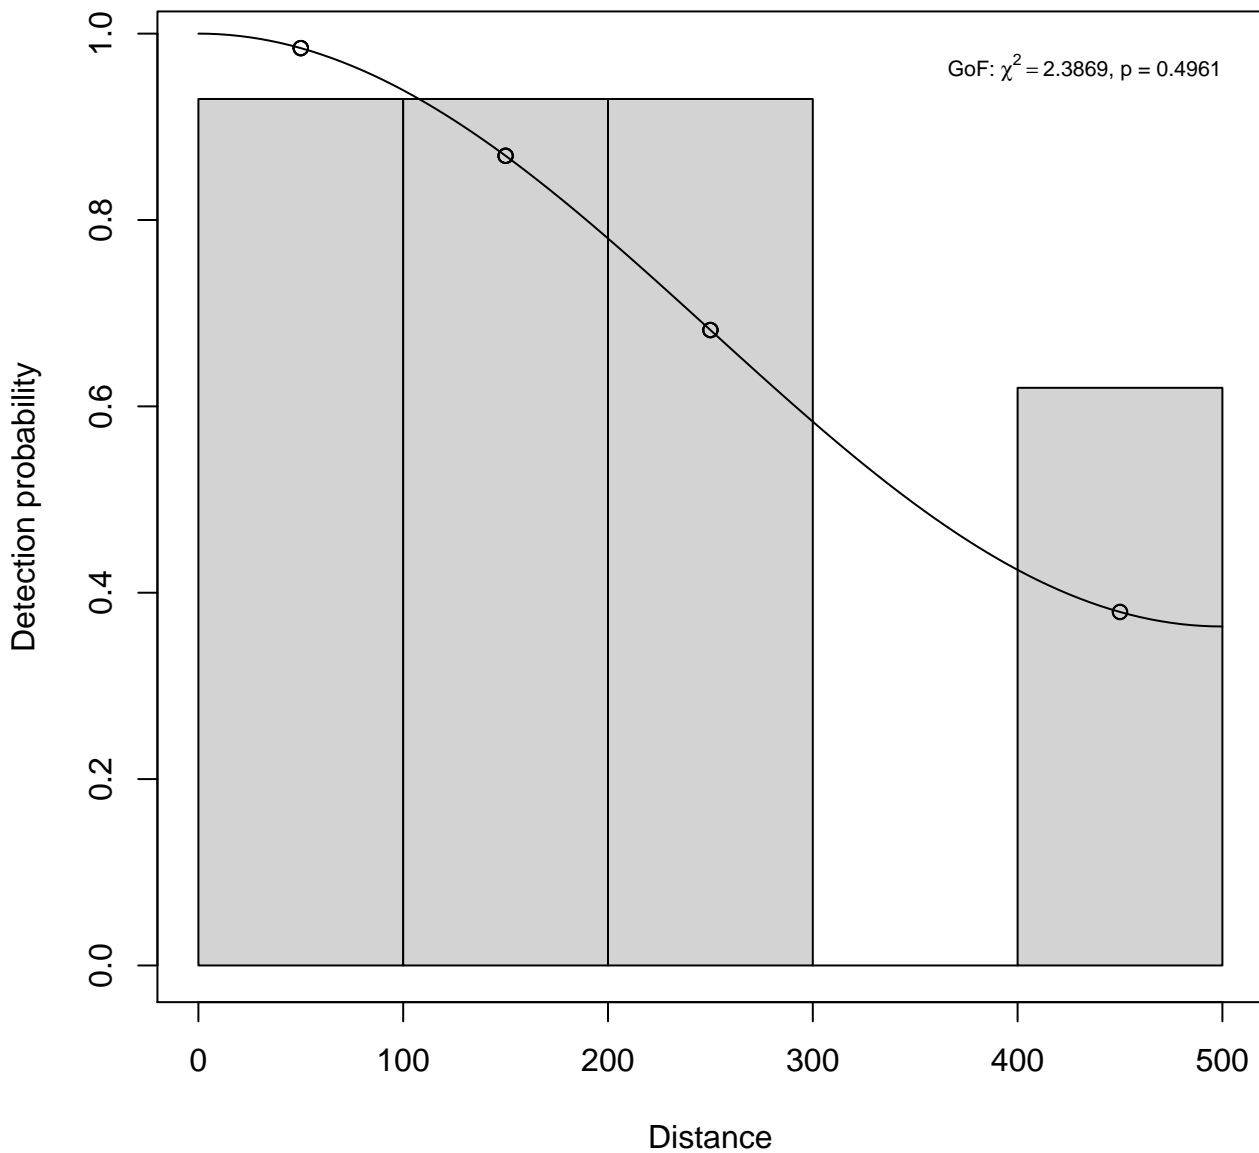

Supplement: s1 [file s1]
