# Supplementary material
Source: MDPI journal article supplement (https://www.mdpi.com/1424-2818/13/7/300)

# **Anodorhynchus leari – Caatinga – Brazil**

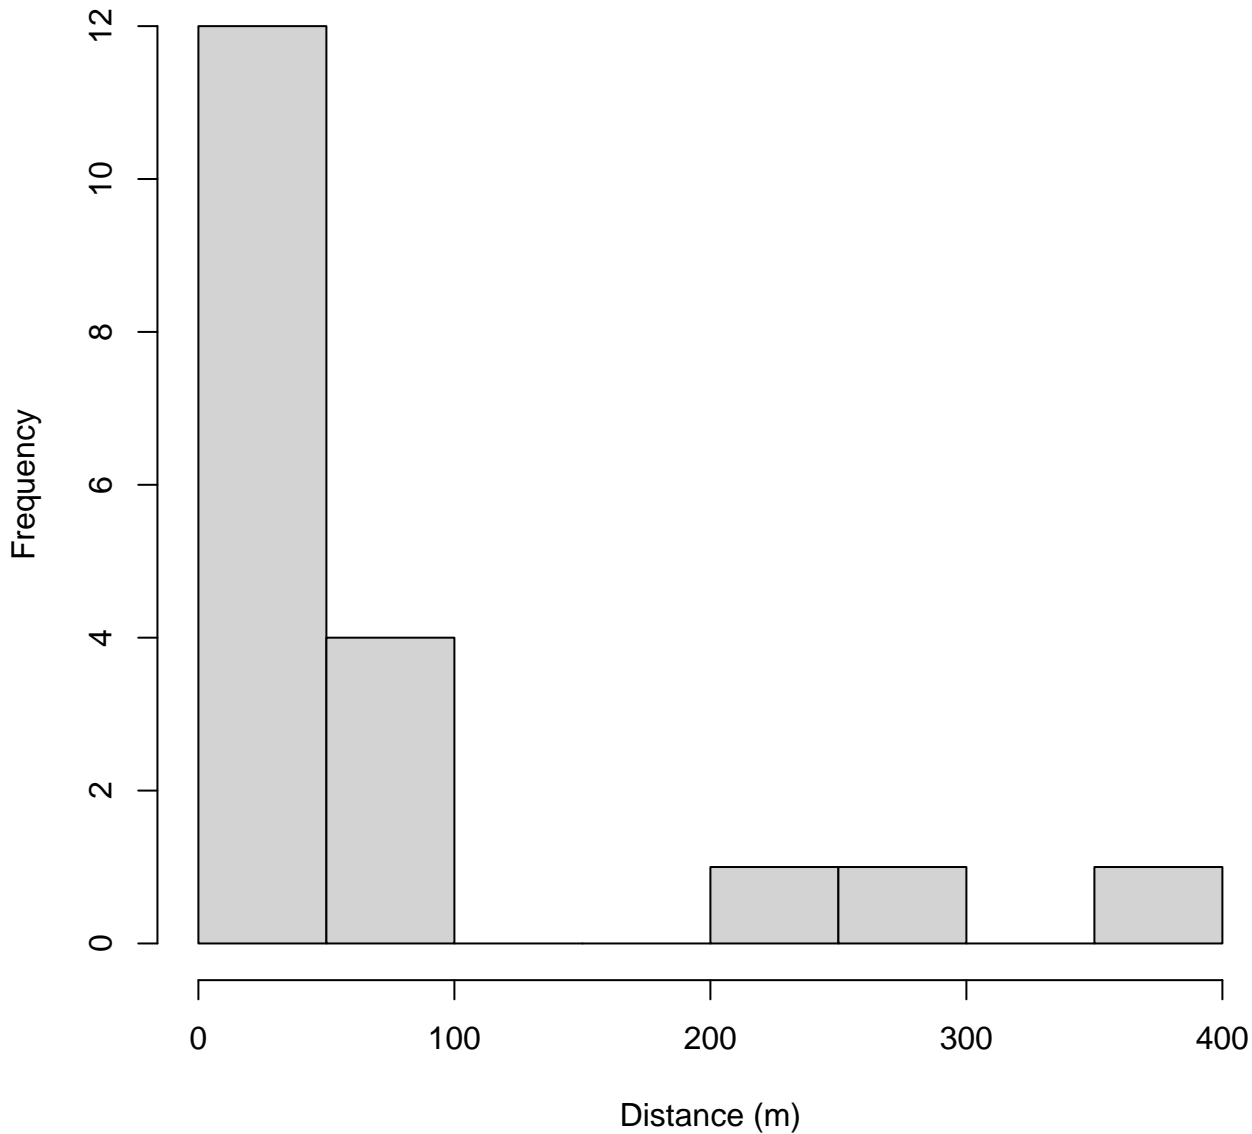

# Anodorhynchus leari – Caatinga – Brazil

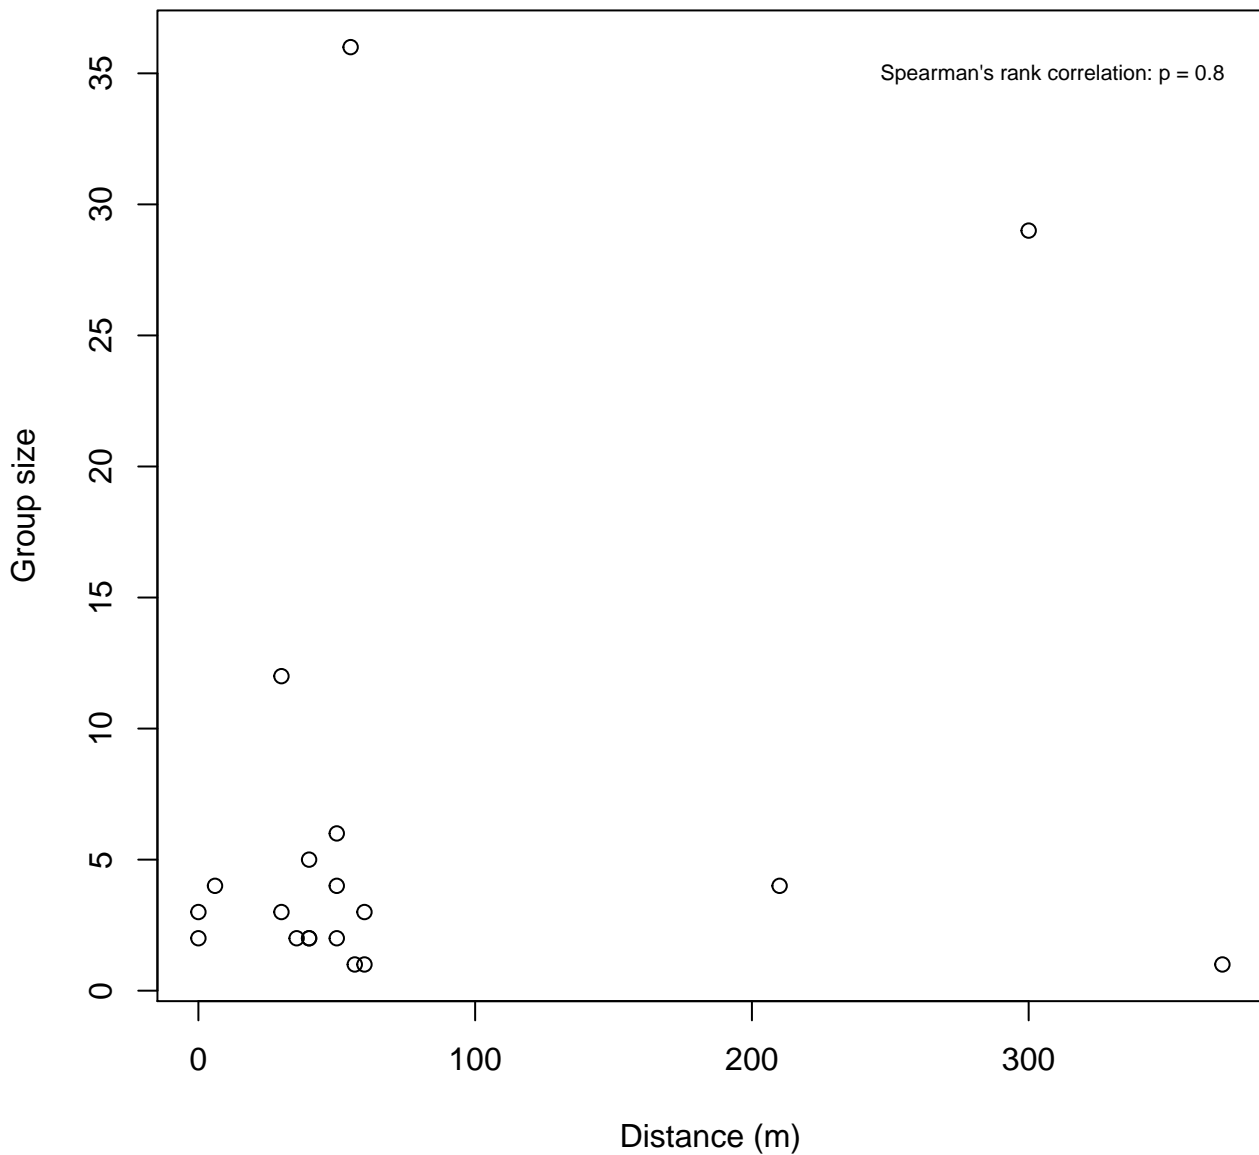

Anodorhynchus leari – Caatinga – Brazil (N = 19, key function = hr)

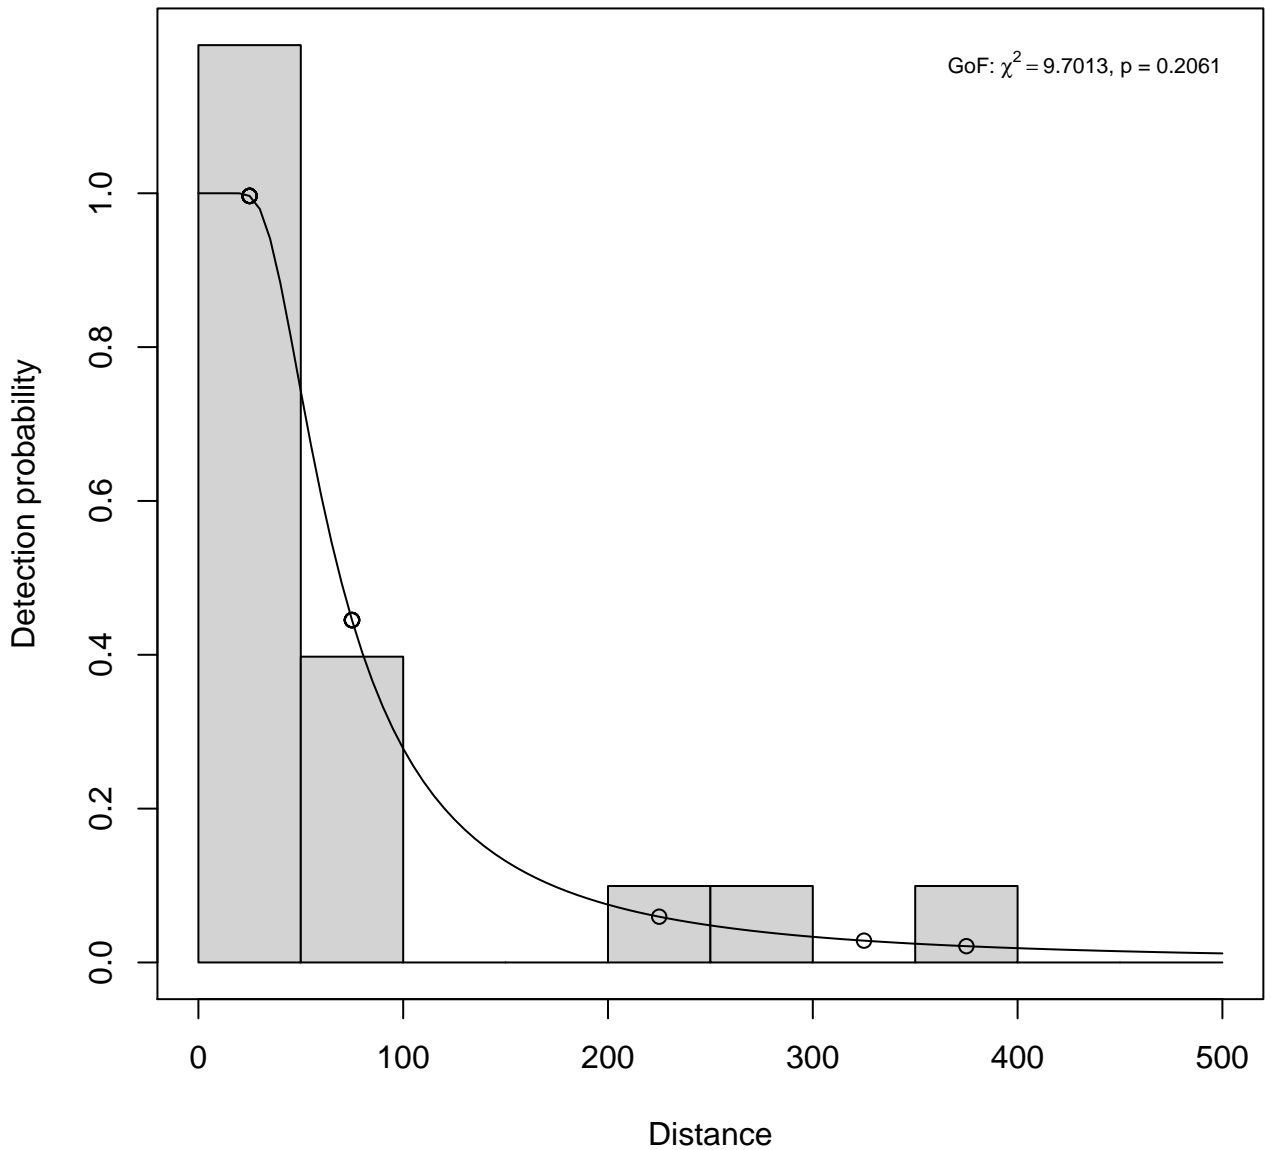

Anodorhynchus leari – Caatinga – Brazil (N = 19, key function = hr)

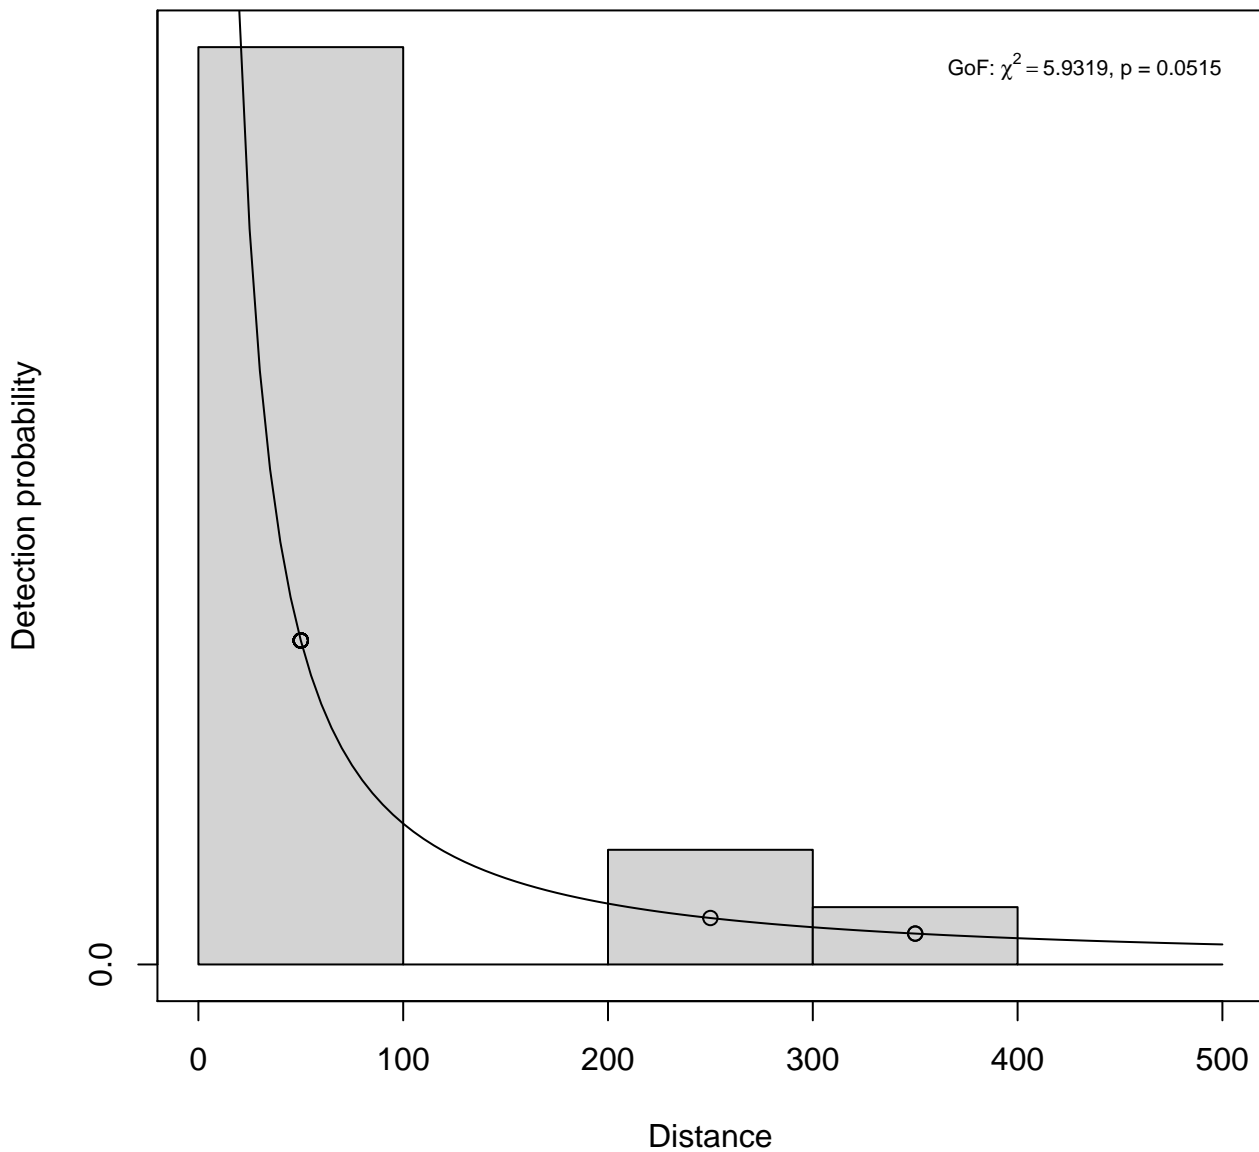

Anodorhynchus leari – Caatinga – Brazil (N = 19, key function = hr)

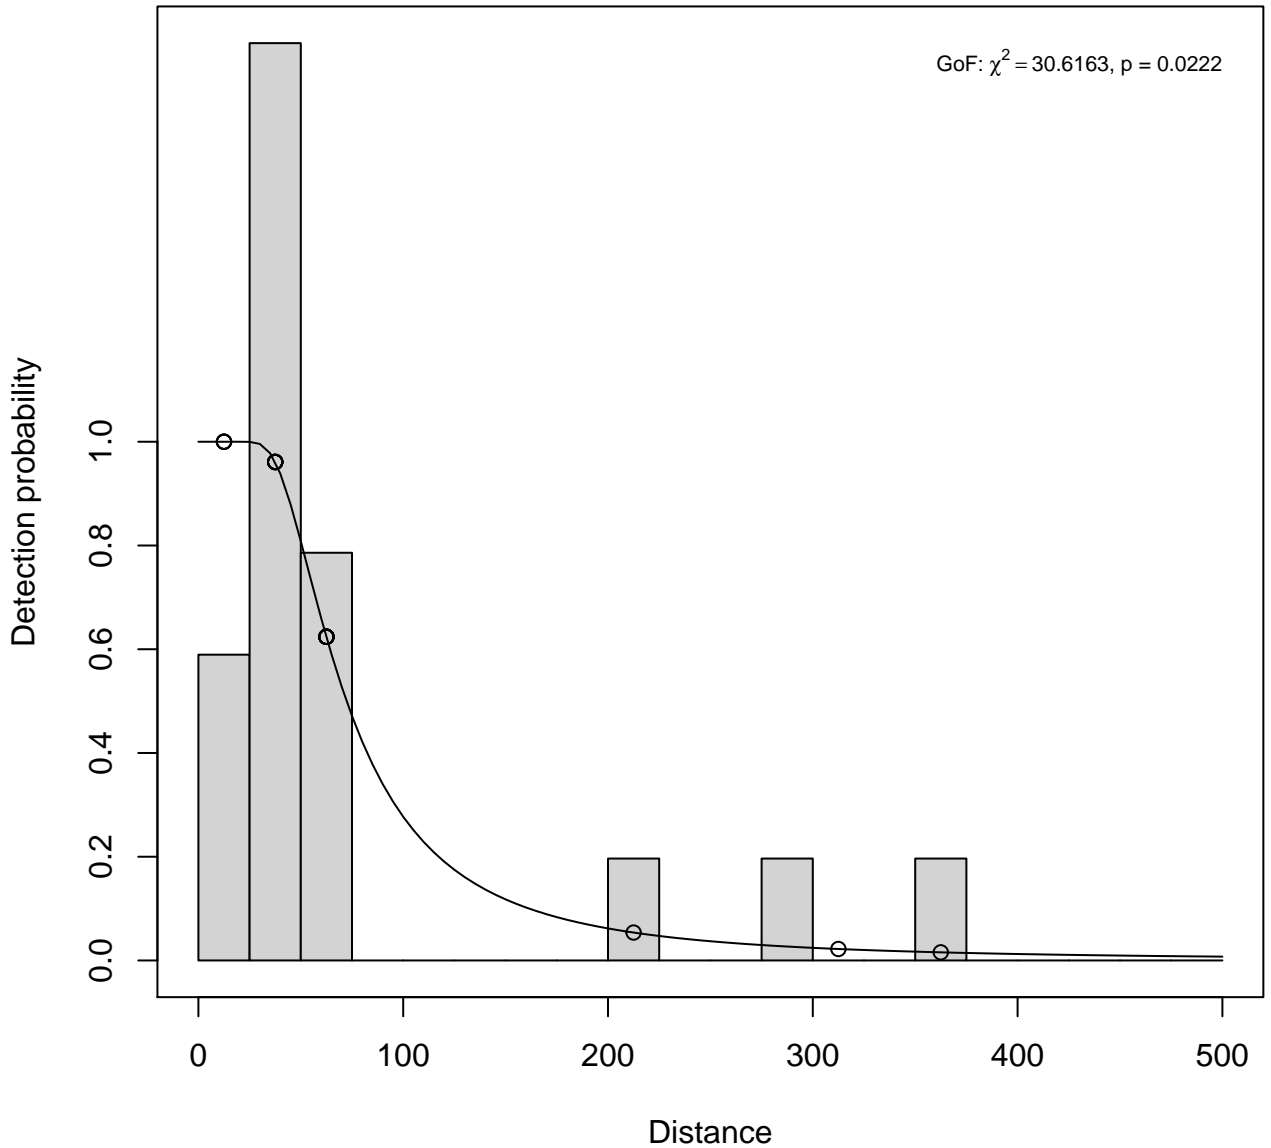

Supplement: s1 [file s1]
