# Supplementary material
Source: MDPI journal article supplement (https://www.mdpi.com/1424-2818/13/7/300)

# ***Psittacara mitratus* – Peruvian Yungas – Peru**

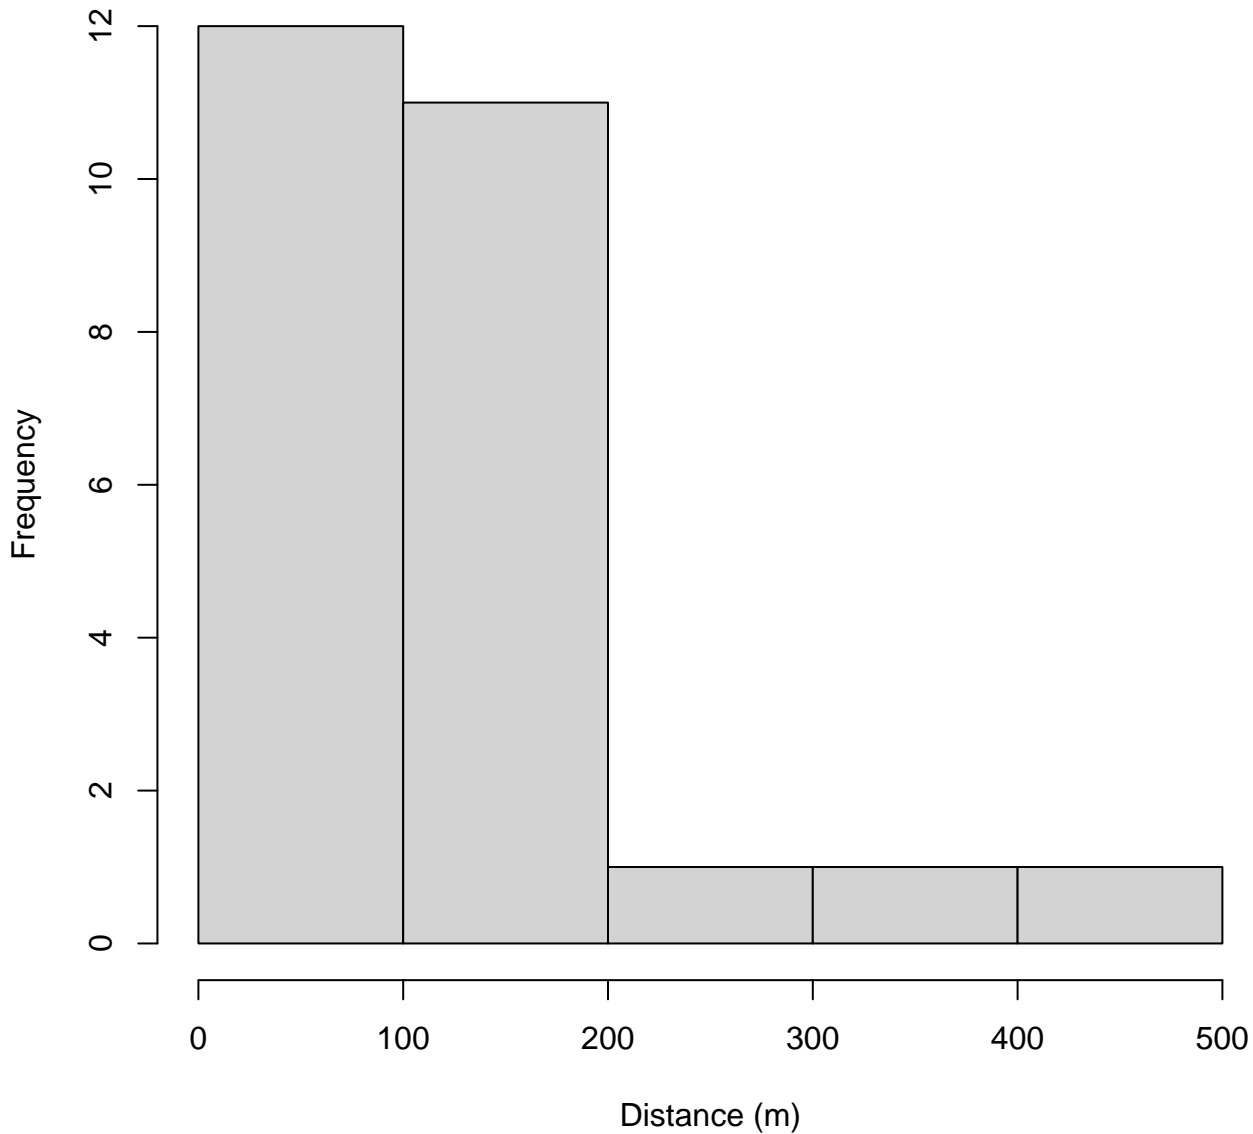

# **Psittacara mitratus – Peruvian Yungas – Peru**

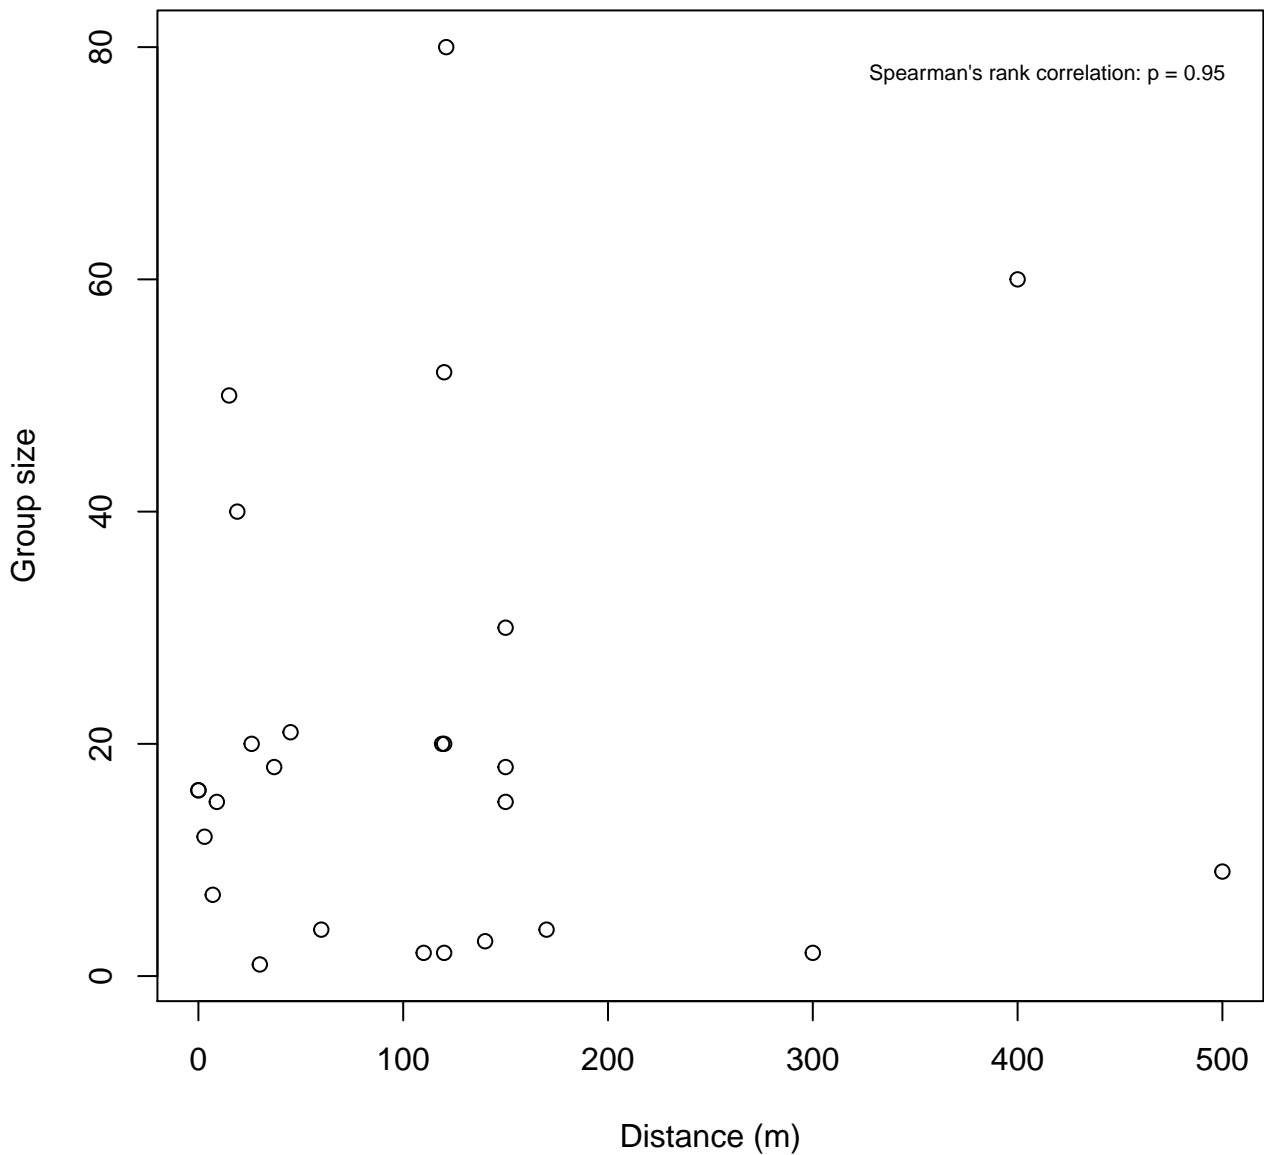

Psittacara mitratus – Peruvian Yungas – Peru (N = 26, key function = hn)

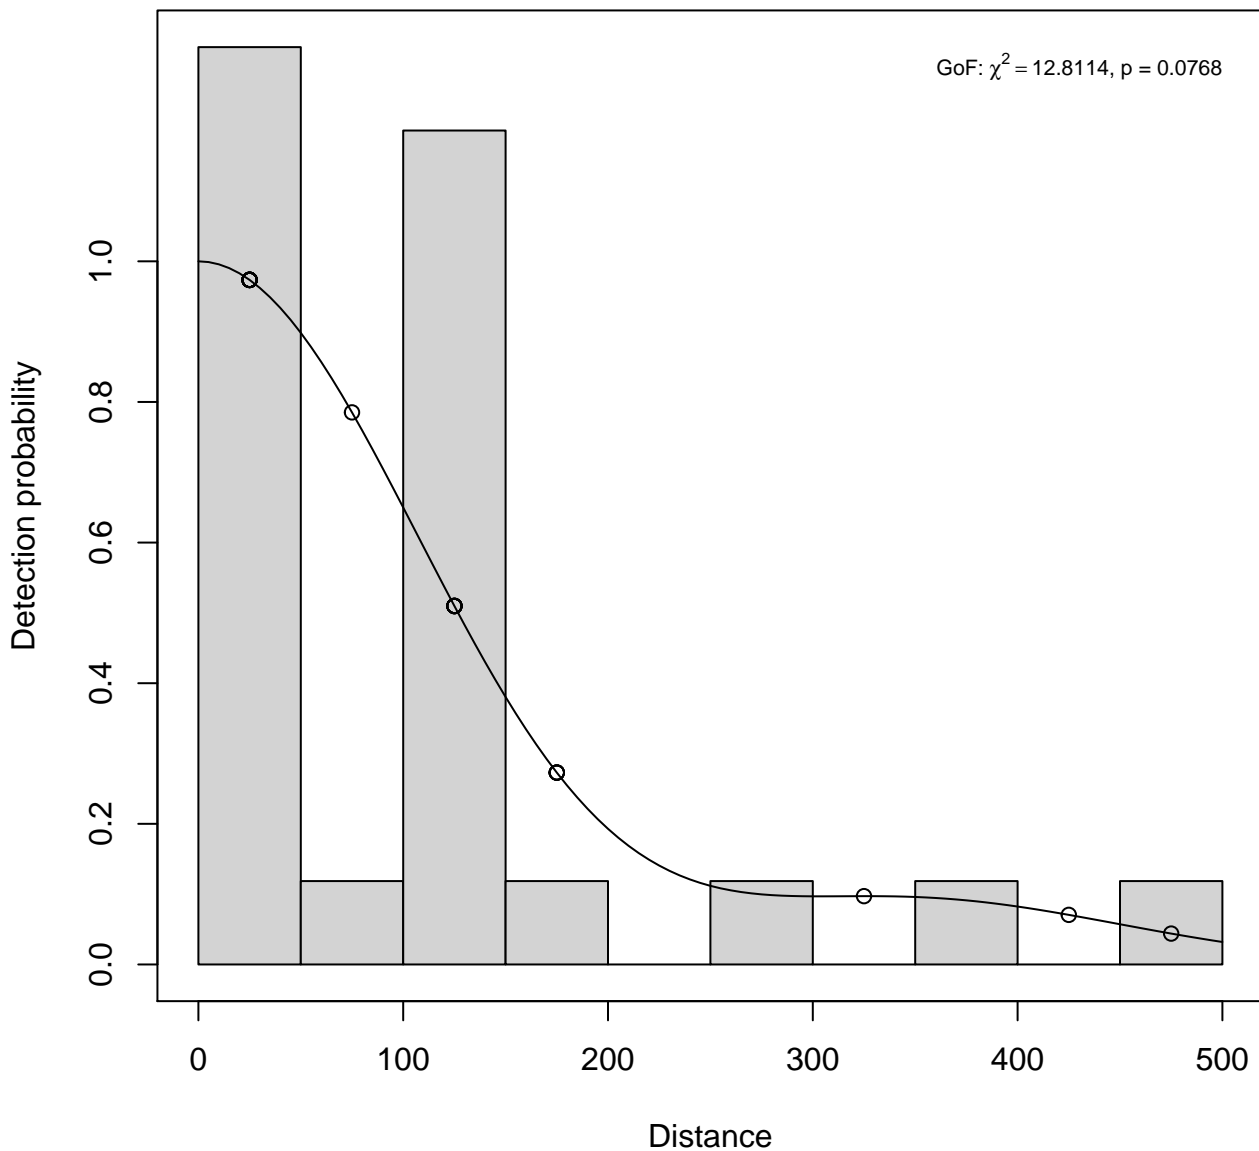

Psittacara mitratus – Peruvian Yungas – Peru (N = 26, key function = hn)

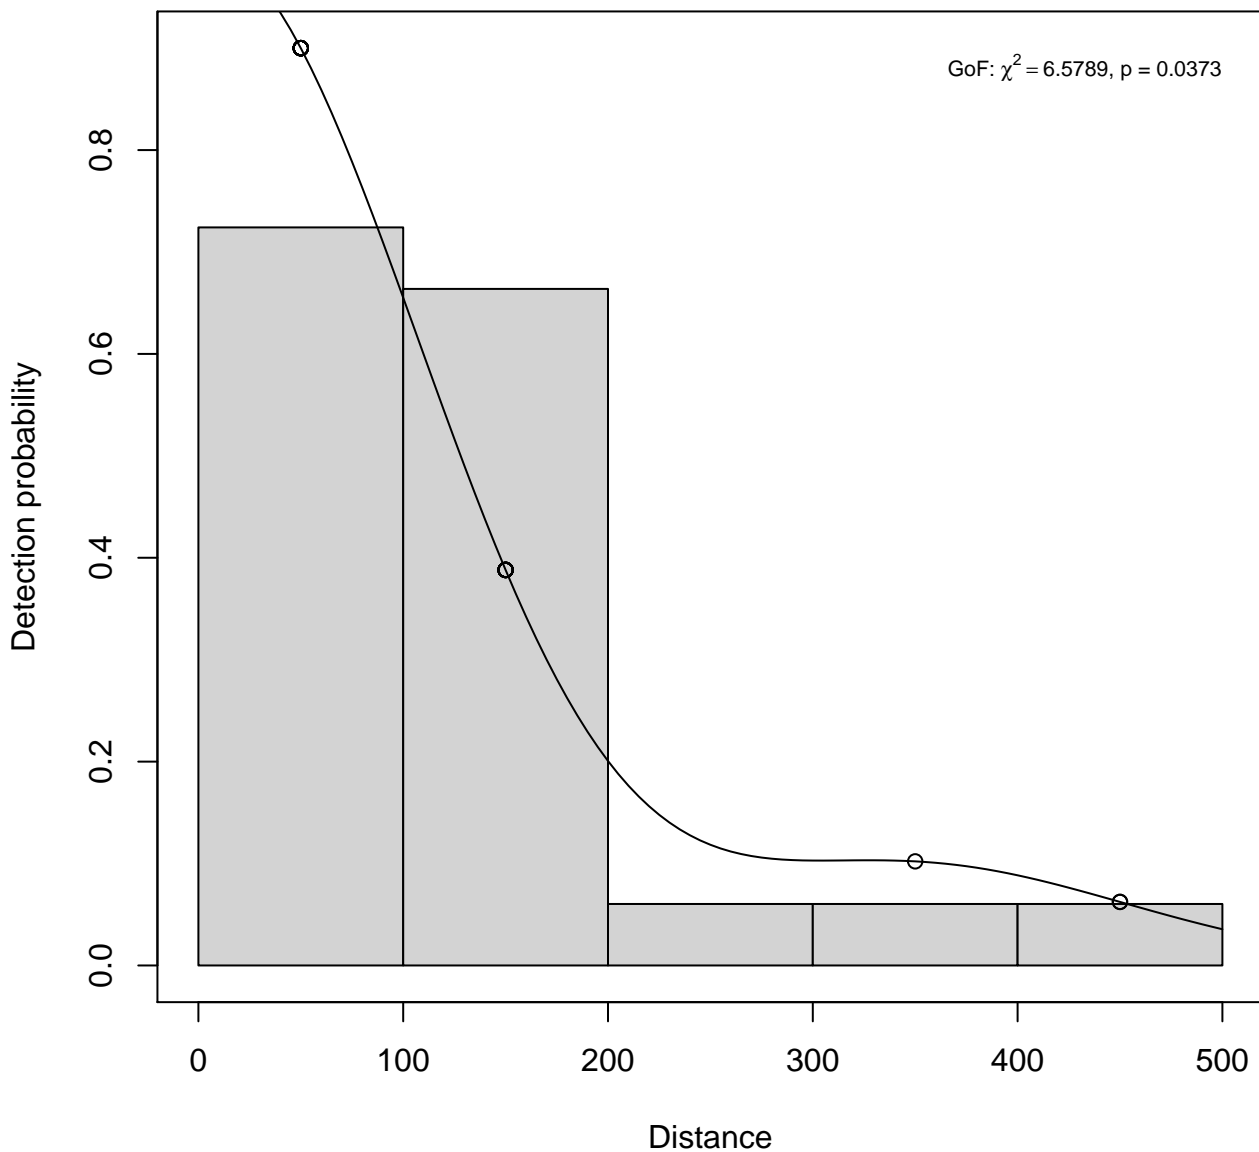

Psittacara mitratus – Peruvian Yungas – Peru (N = 26, key function = hn)

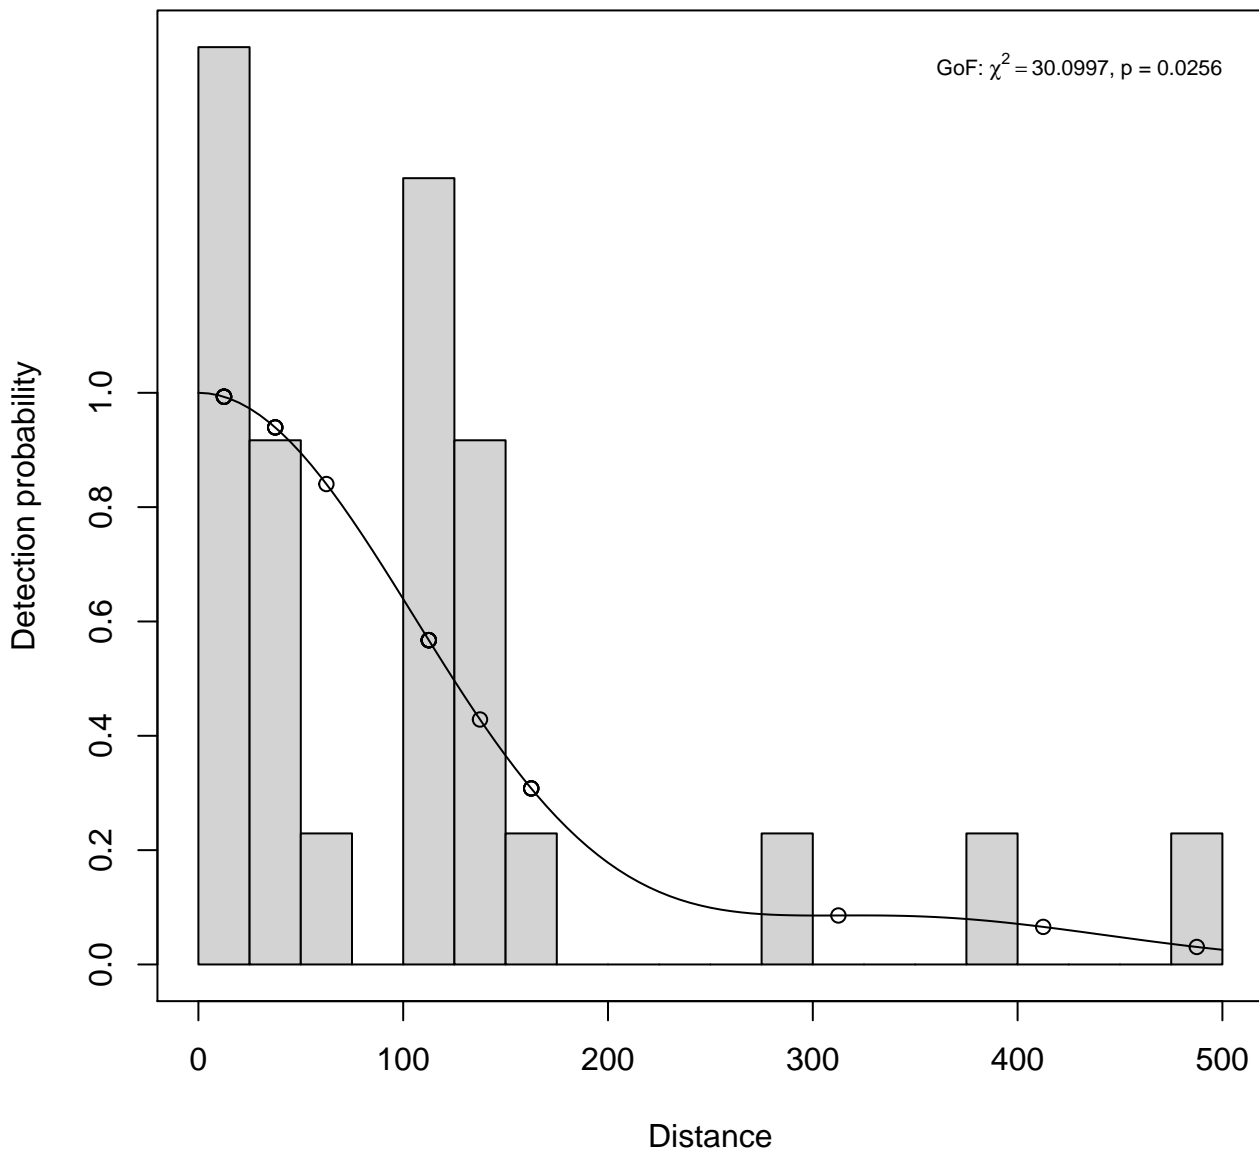

Supplement: s1 [file s1]
