# Supplementary material
Source: MDPI journal article supplement (https://www.mdpi.com/1424-2818/13/7/300)

# **Psilopsiagon aymara – Bolivian montane dry forests – Bolivia**

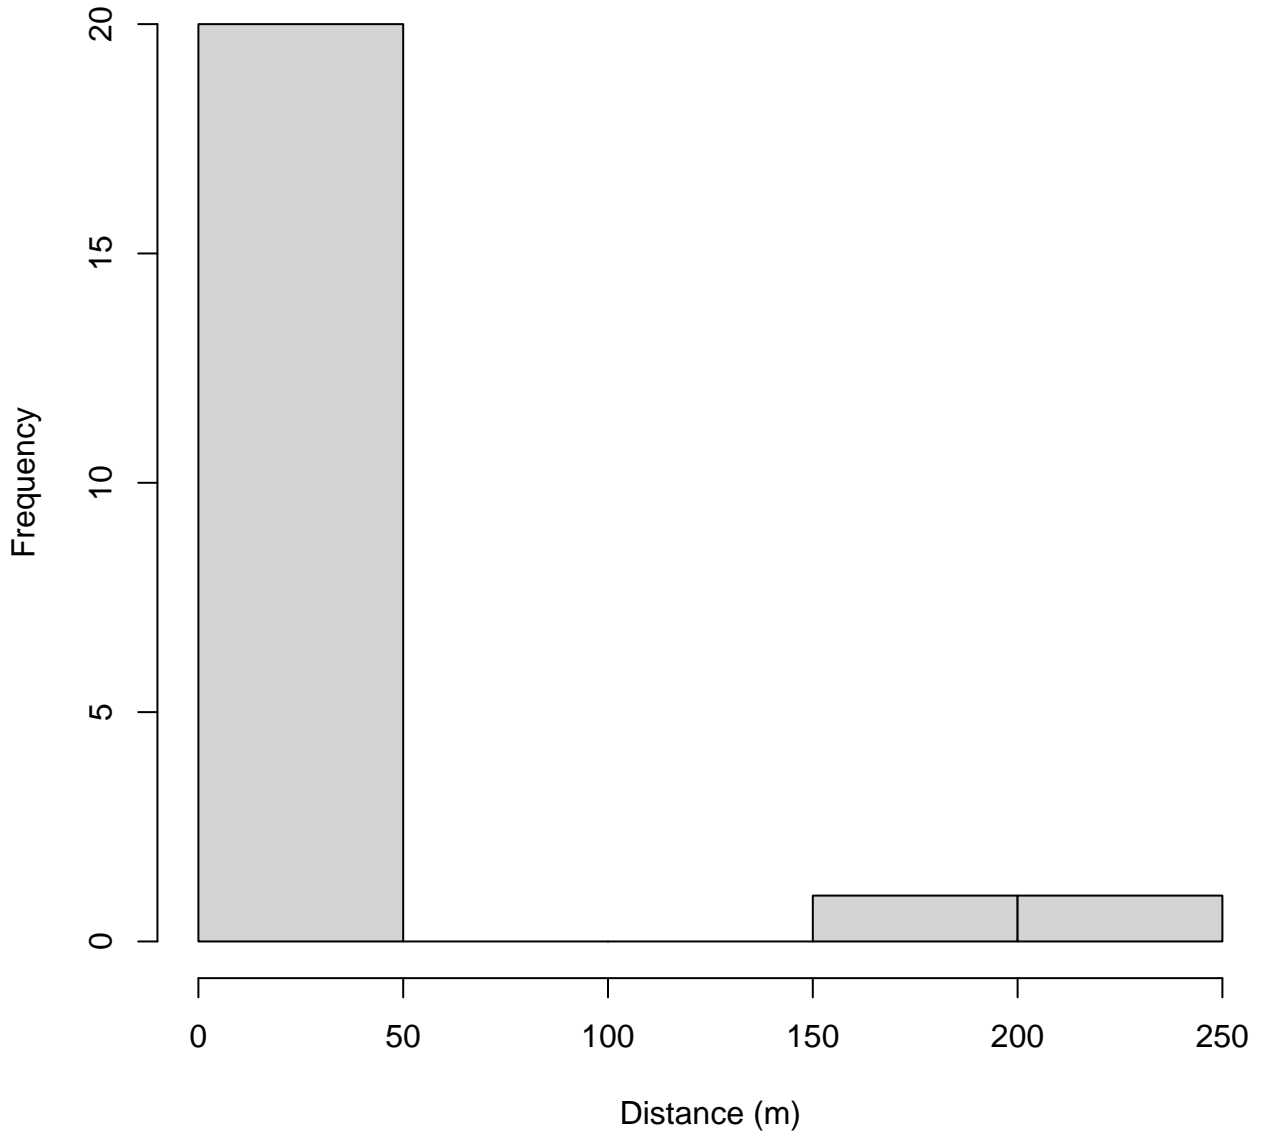

# Psilopsiagon aymara – Bolivian montane dry forests – Bolivia

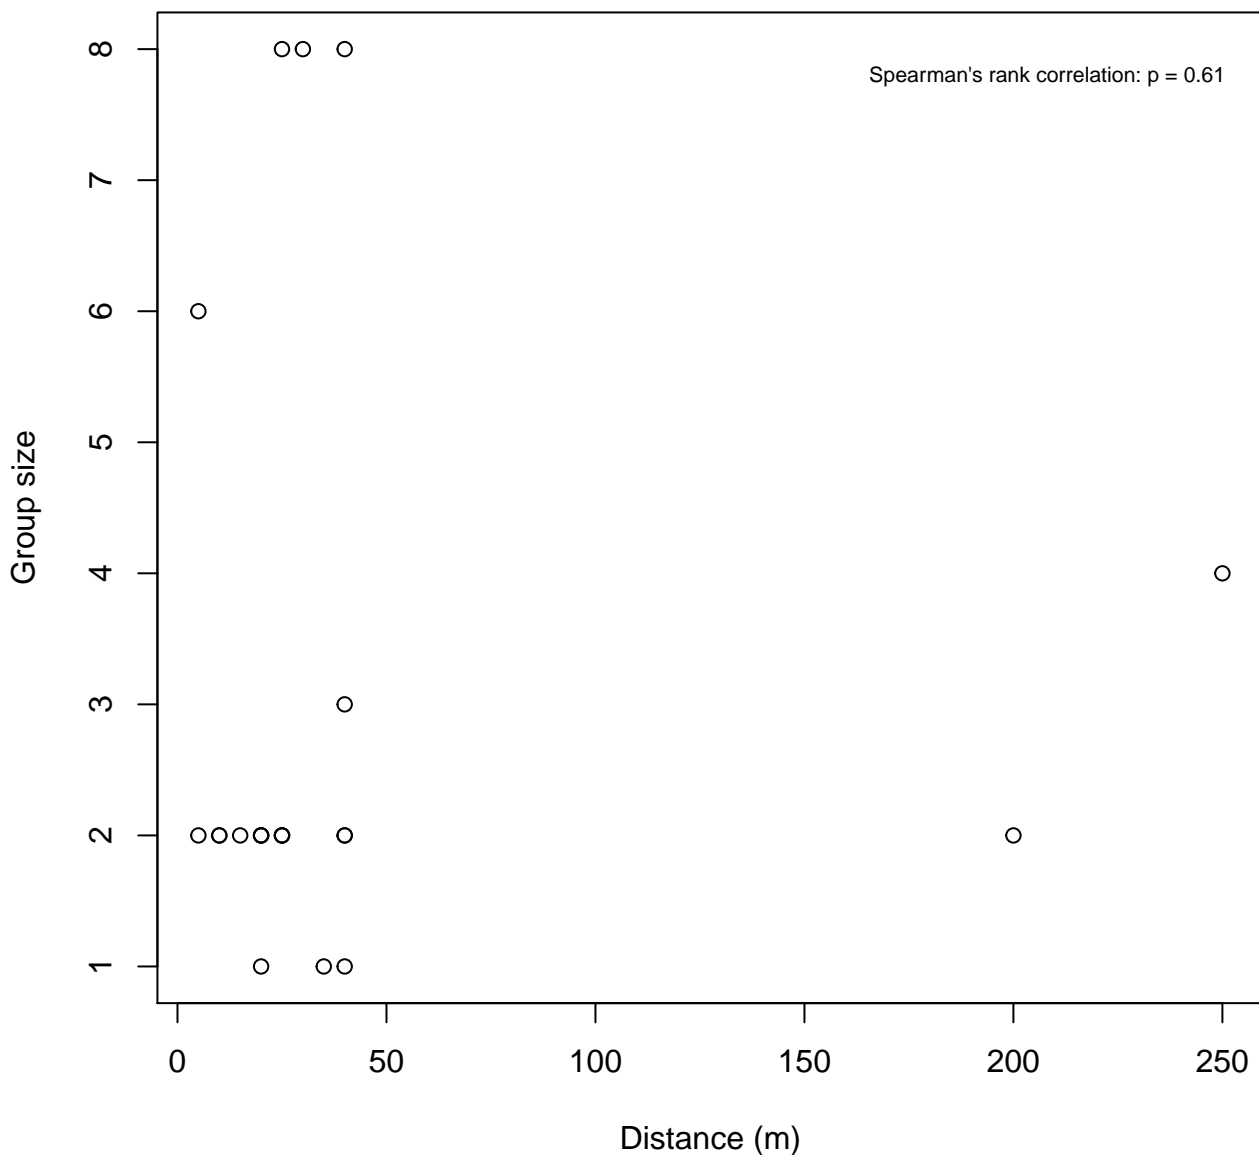

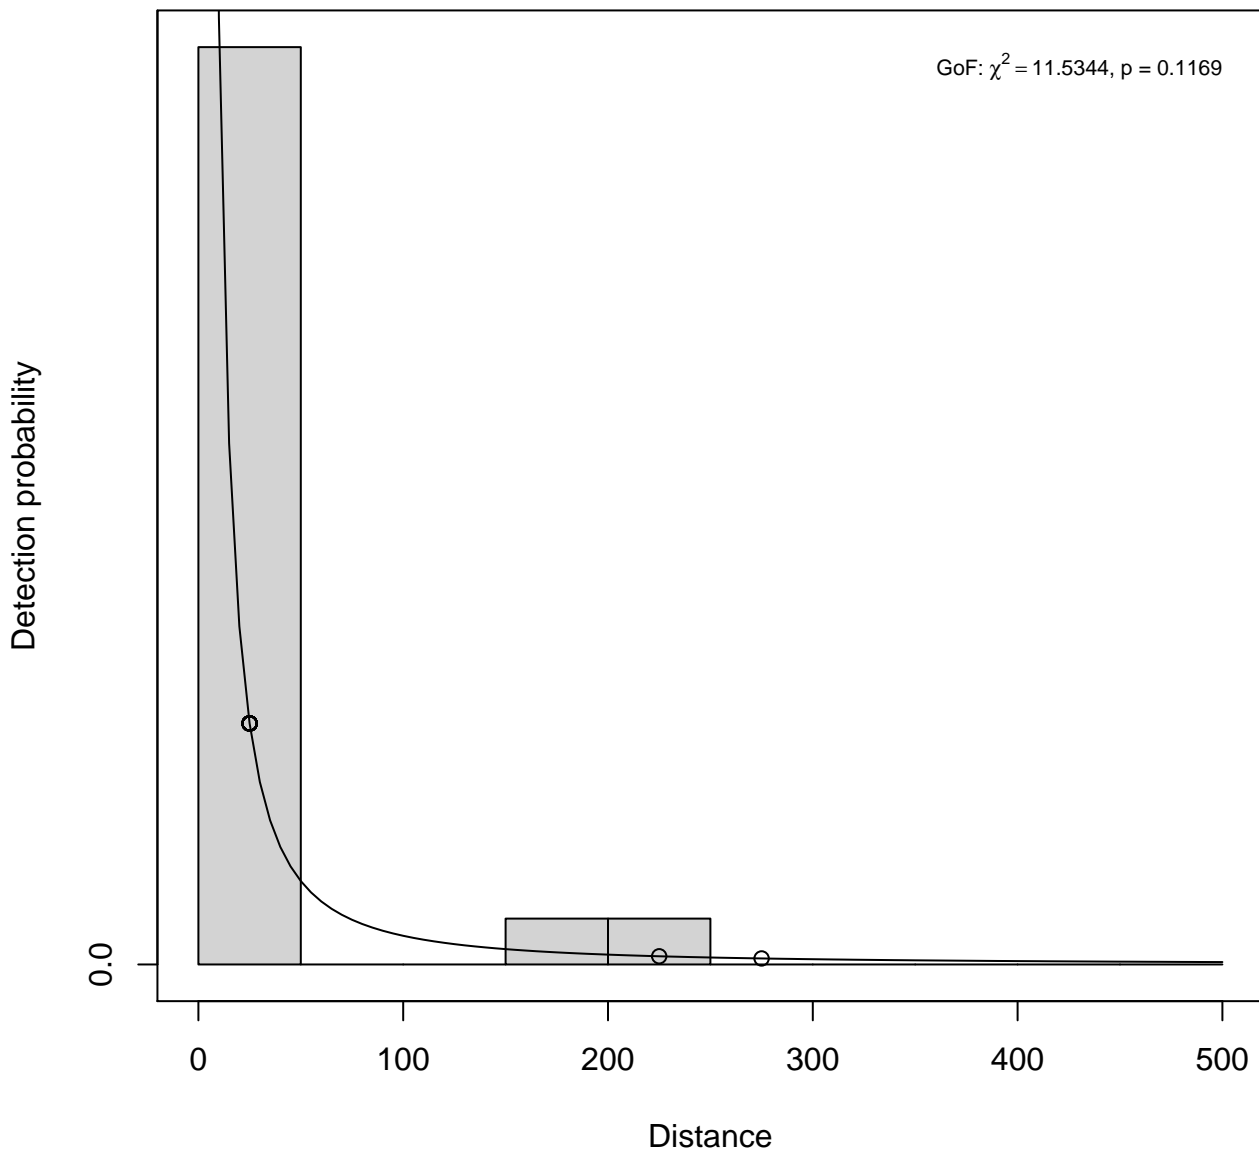

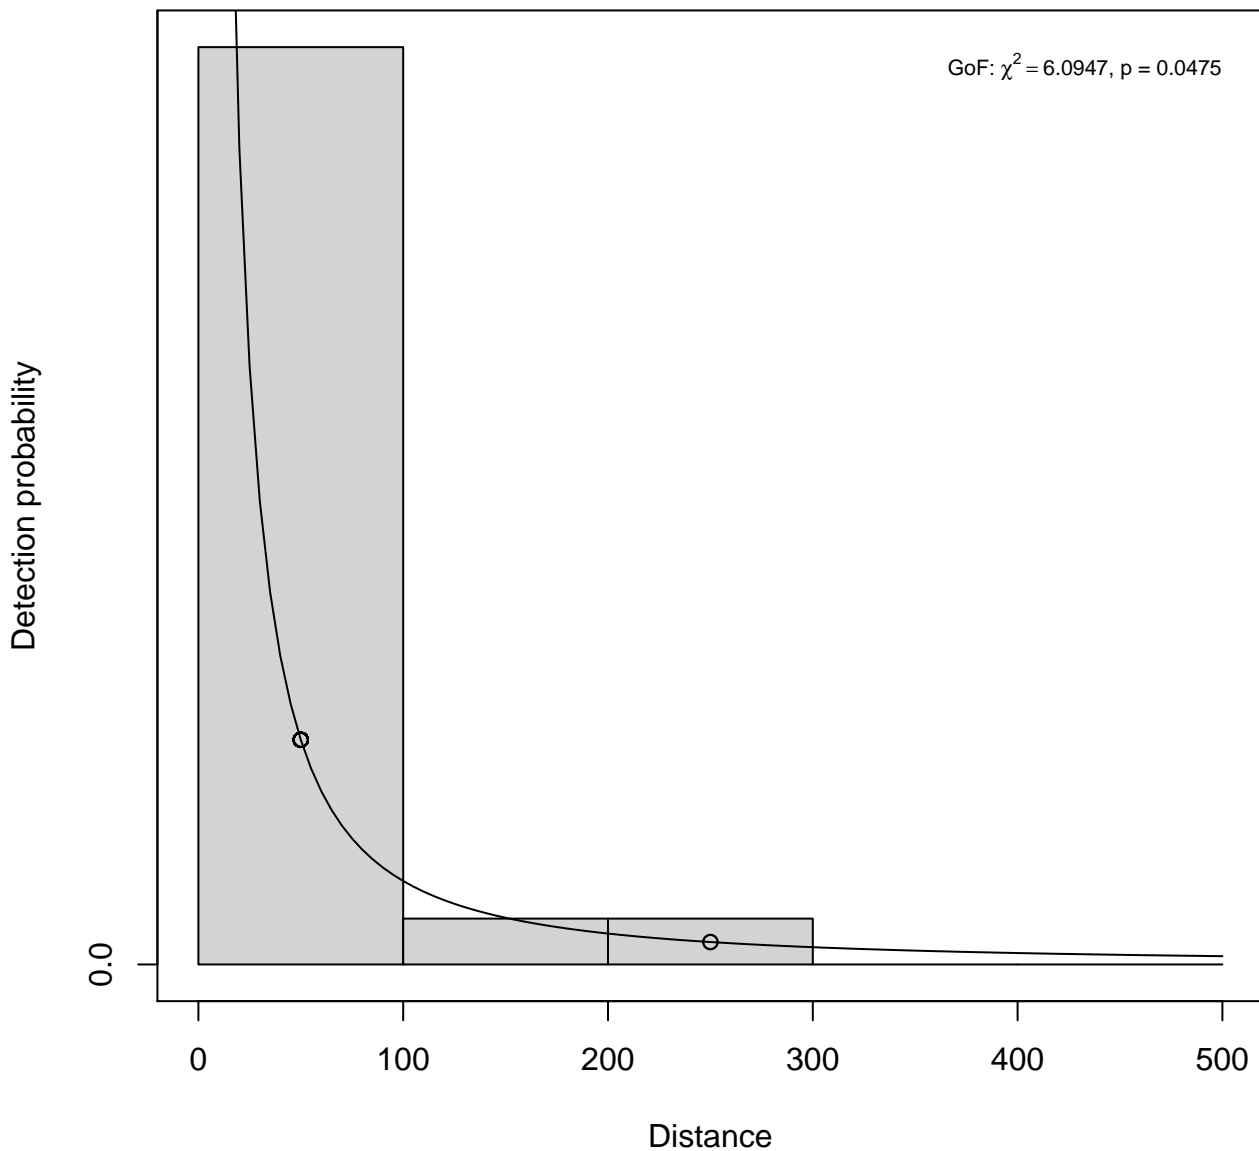

Psilopsiagon aymara – Bolivian montane dry forests – Bolivia (N = 22, key function = hr)

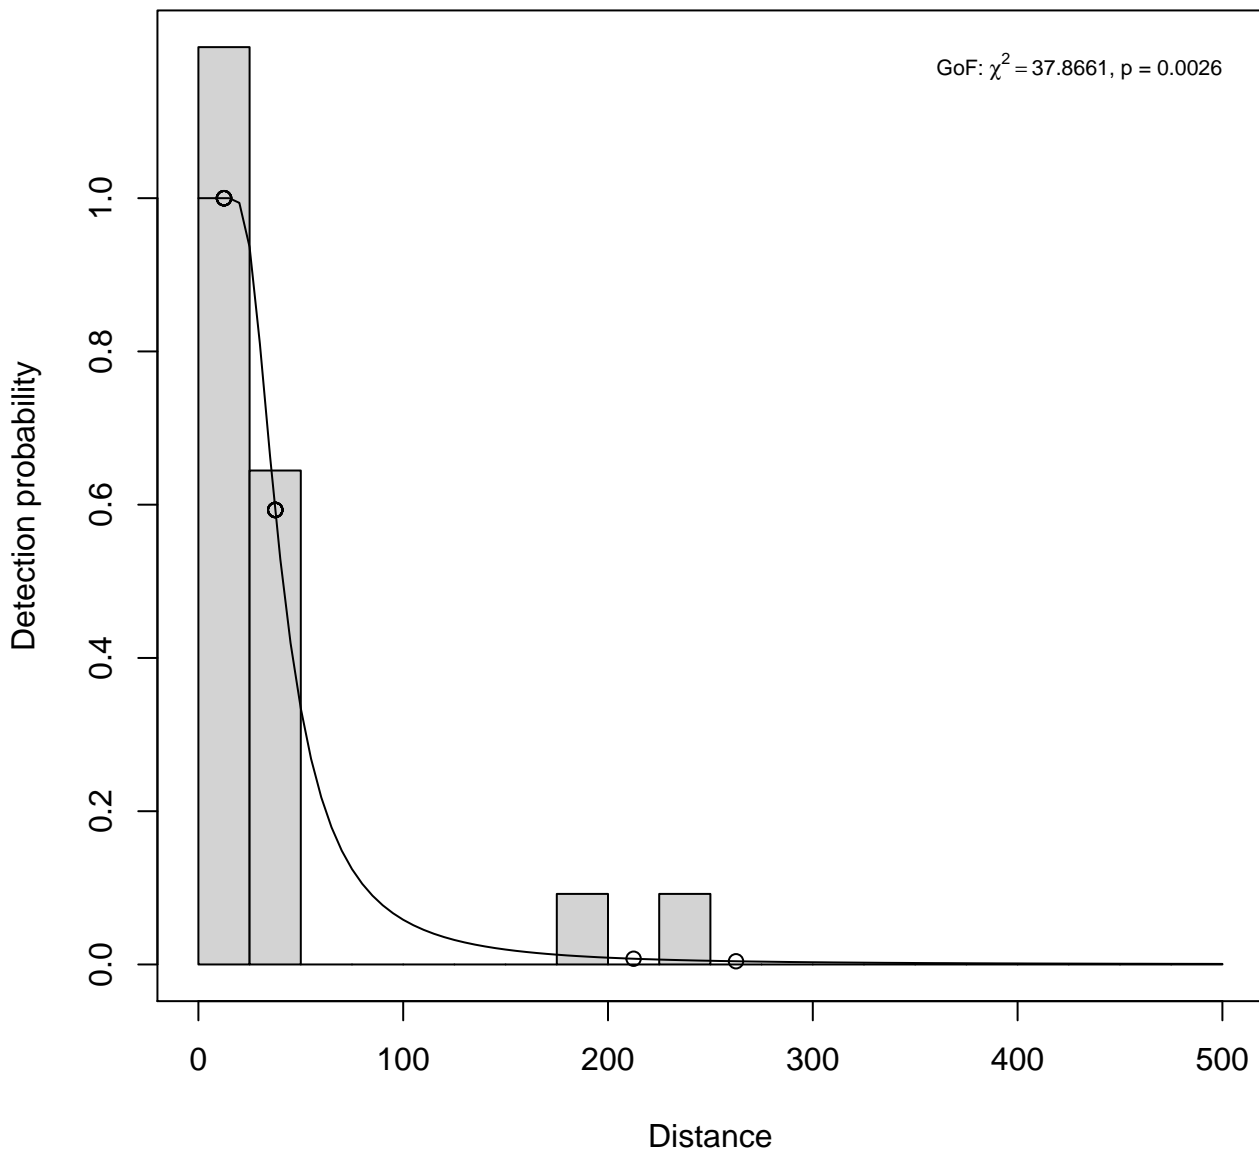

Supplement: s1 [file s1]
