# Supplementary material
Source: MDPI journal article supplement (https://www.mdpi.com/1424-2818/13/7/300)

# **Pionus menstruus – Isthmian–Atlantic moist forests – Costa Rica**

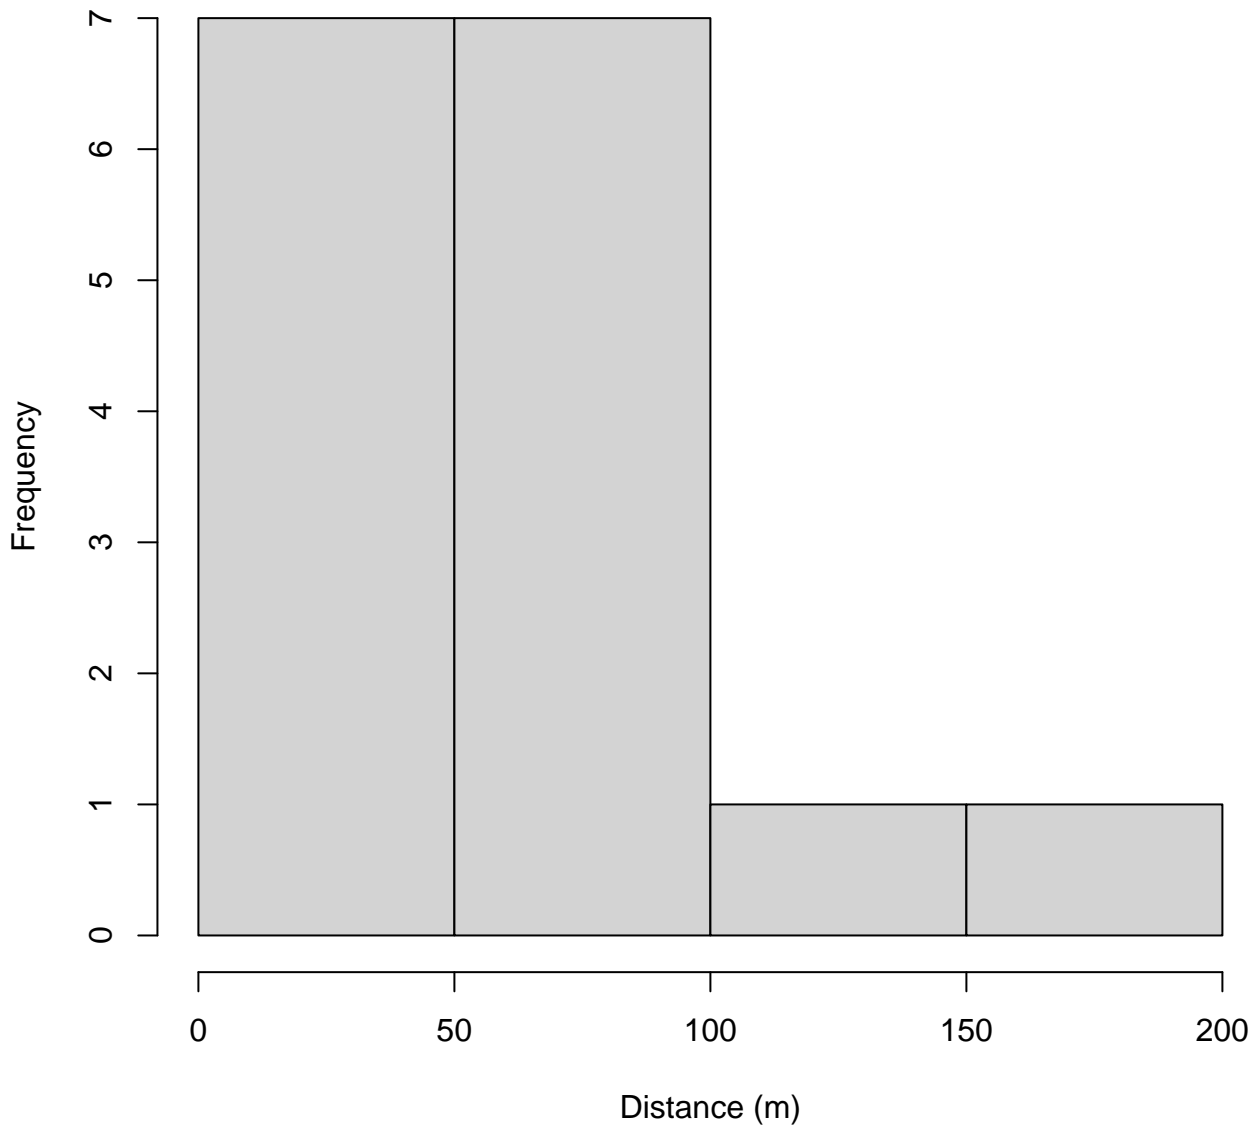

# Pionus menstruus – Isthmian–Atlantic moist forests – Costa Rica

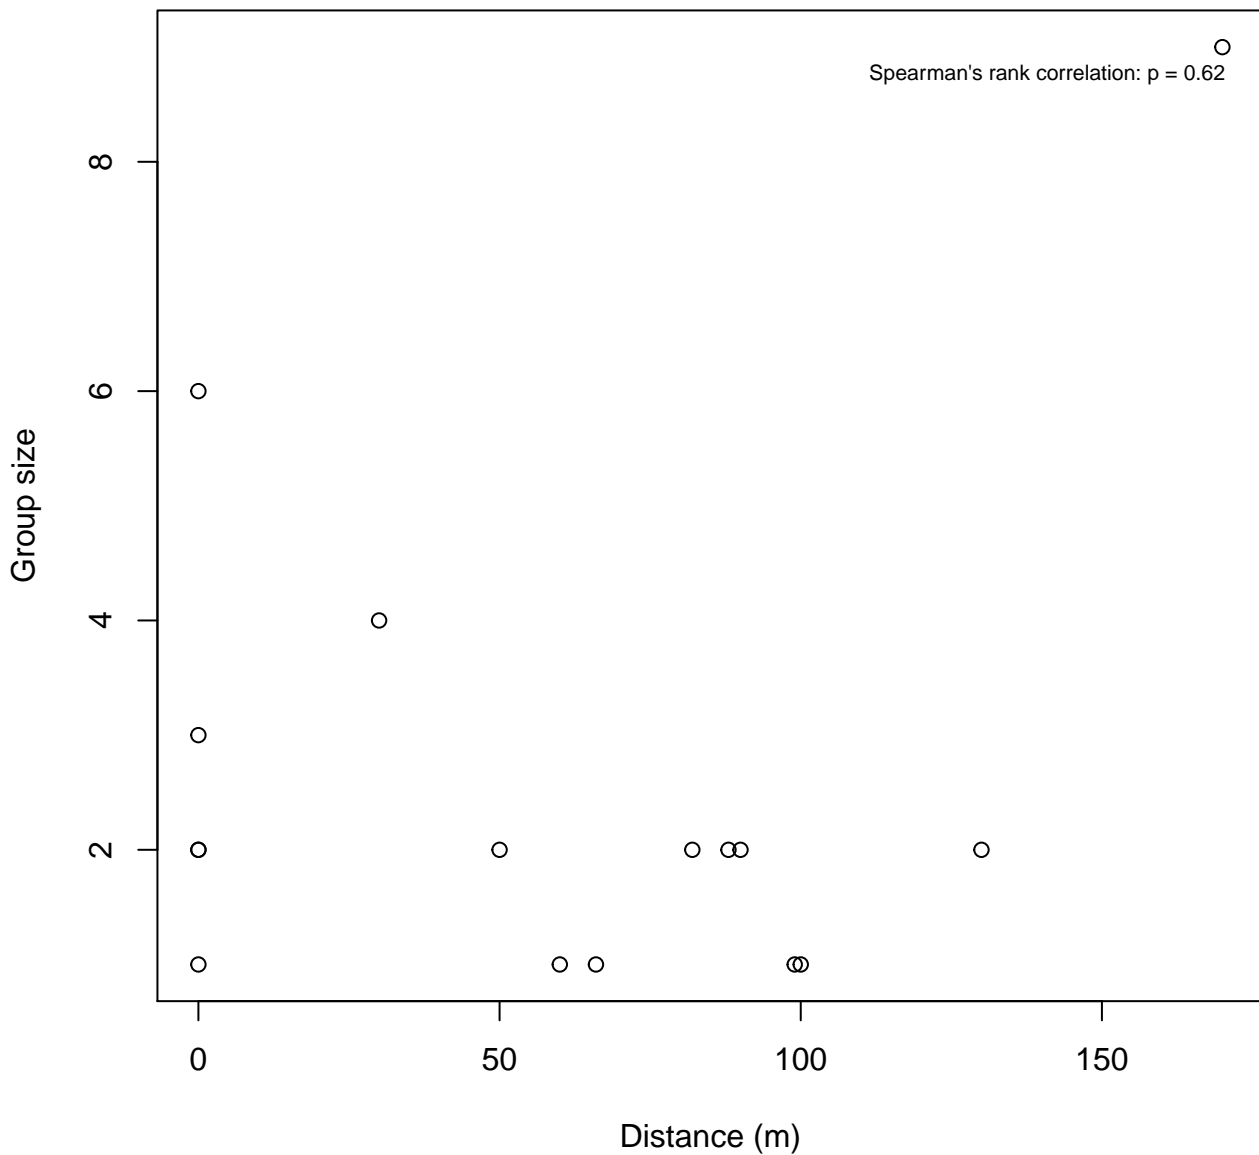

*Pionus menstruus* – Isthmian–Atlantic moist forests – Costa Rica (N = 16, key function = hn)

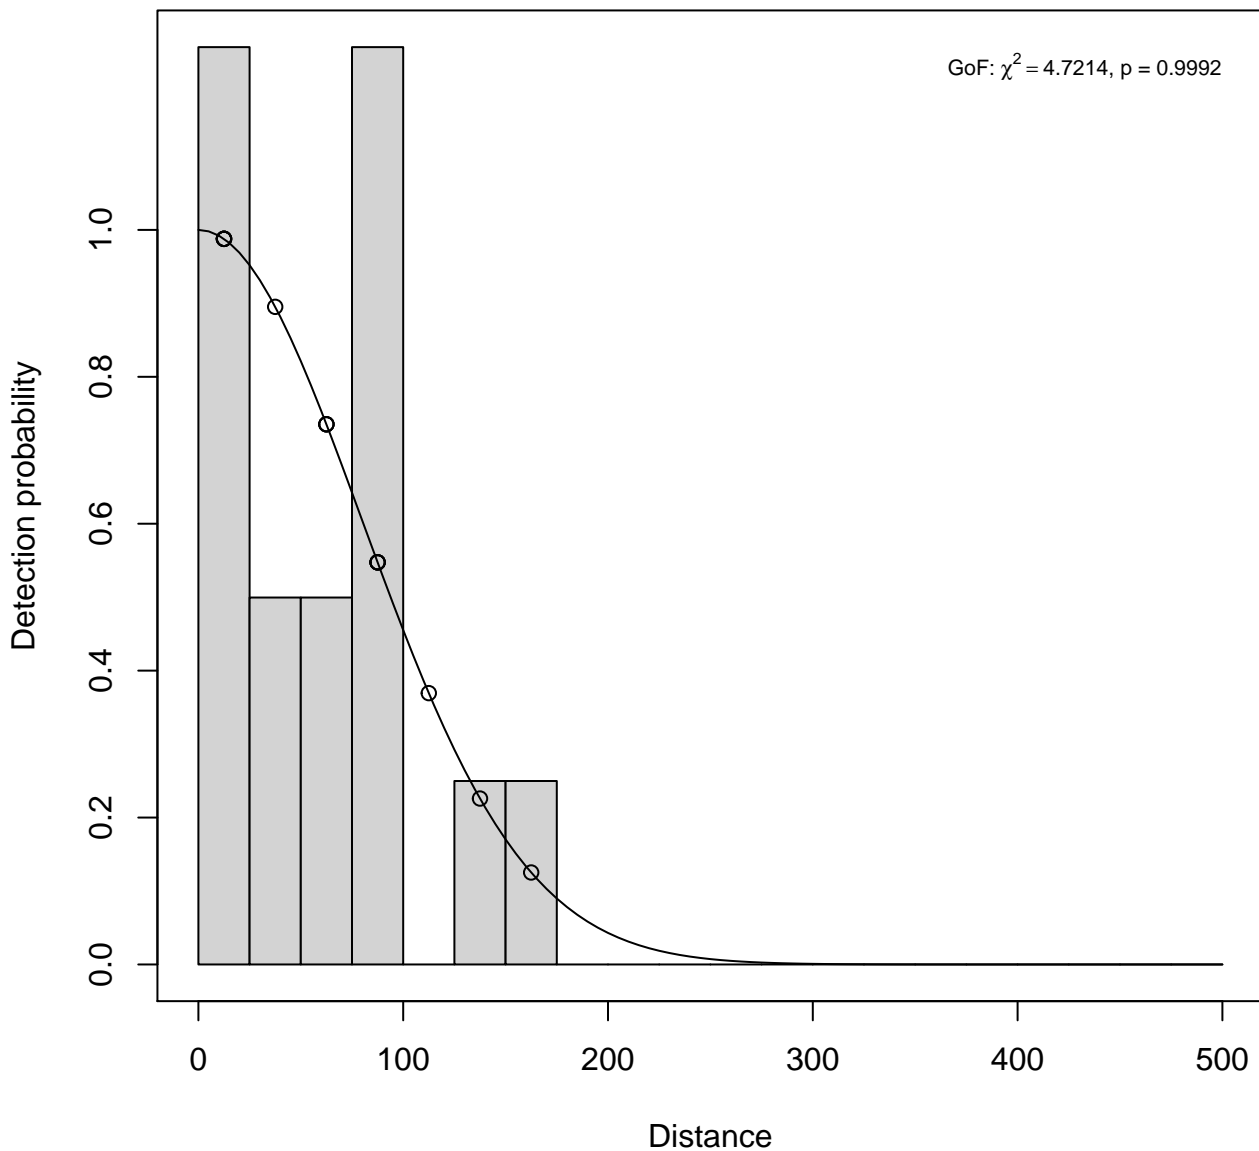

*Pionus menstruus* – Isthmian–Atlantic moist forests – Costa Rica (N = 16, key function = hn)

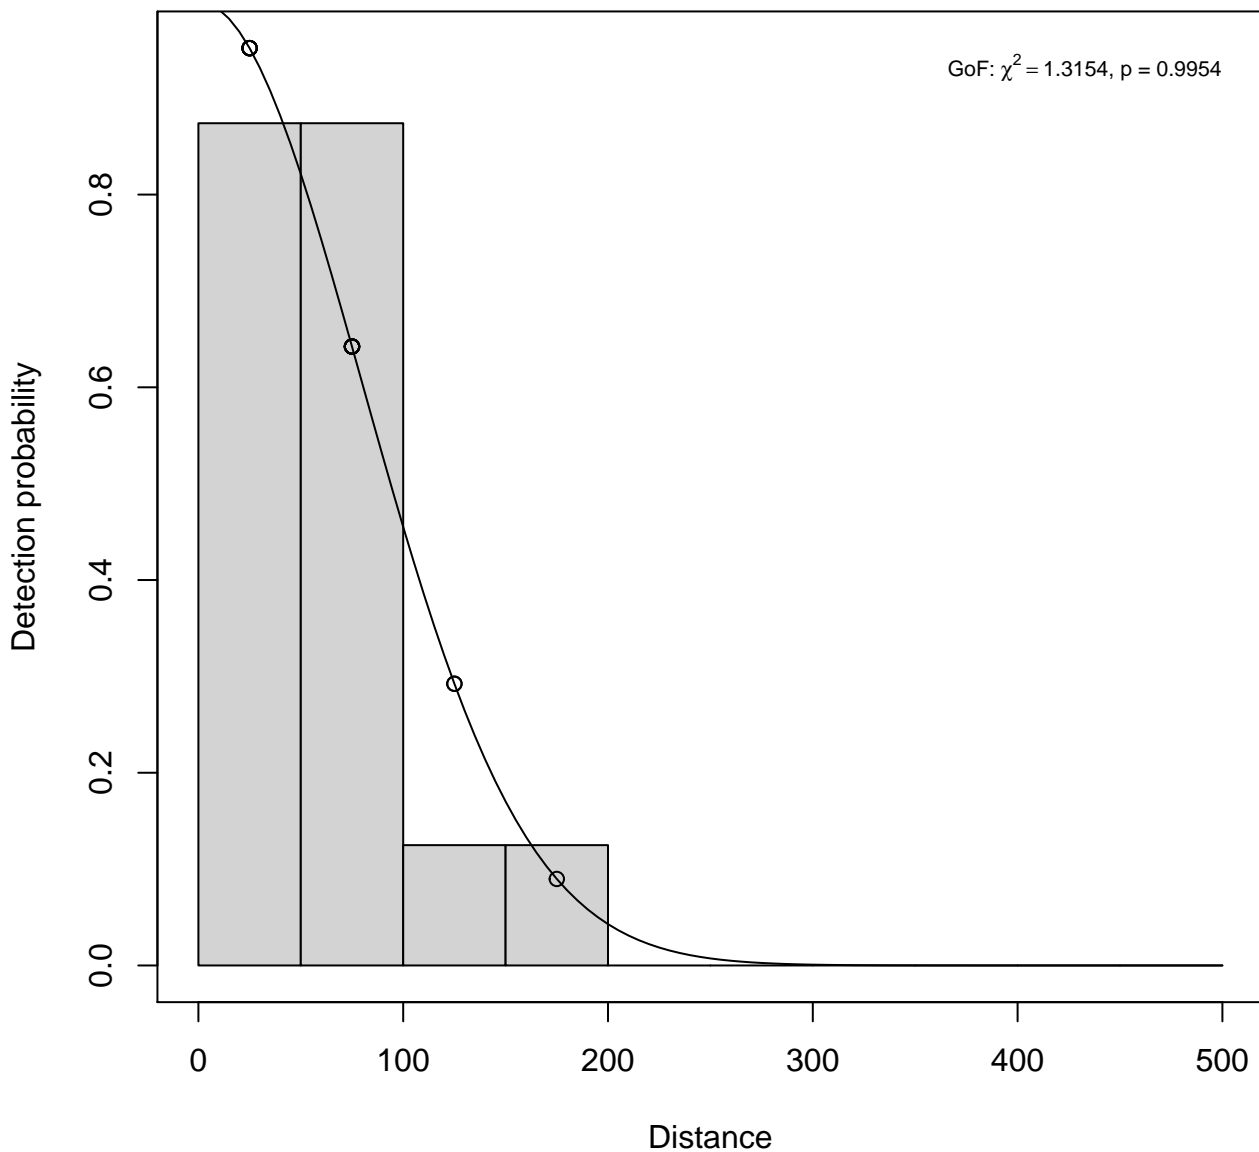

Pionus menstruus – Isthmian–Atlantic moist forests – Costa Rica (N = 16, key function = hn)

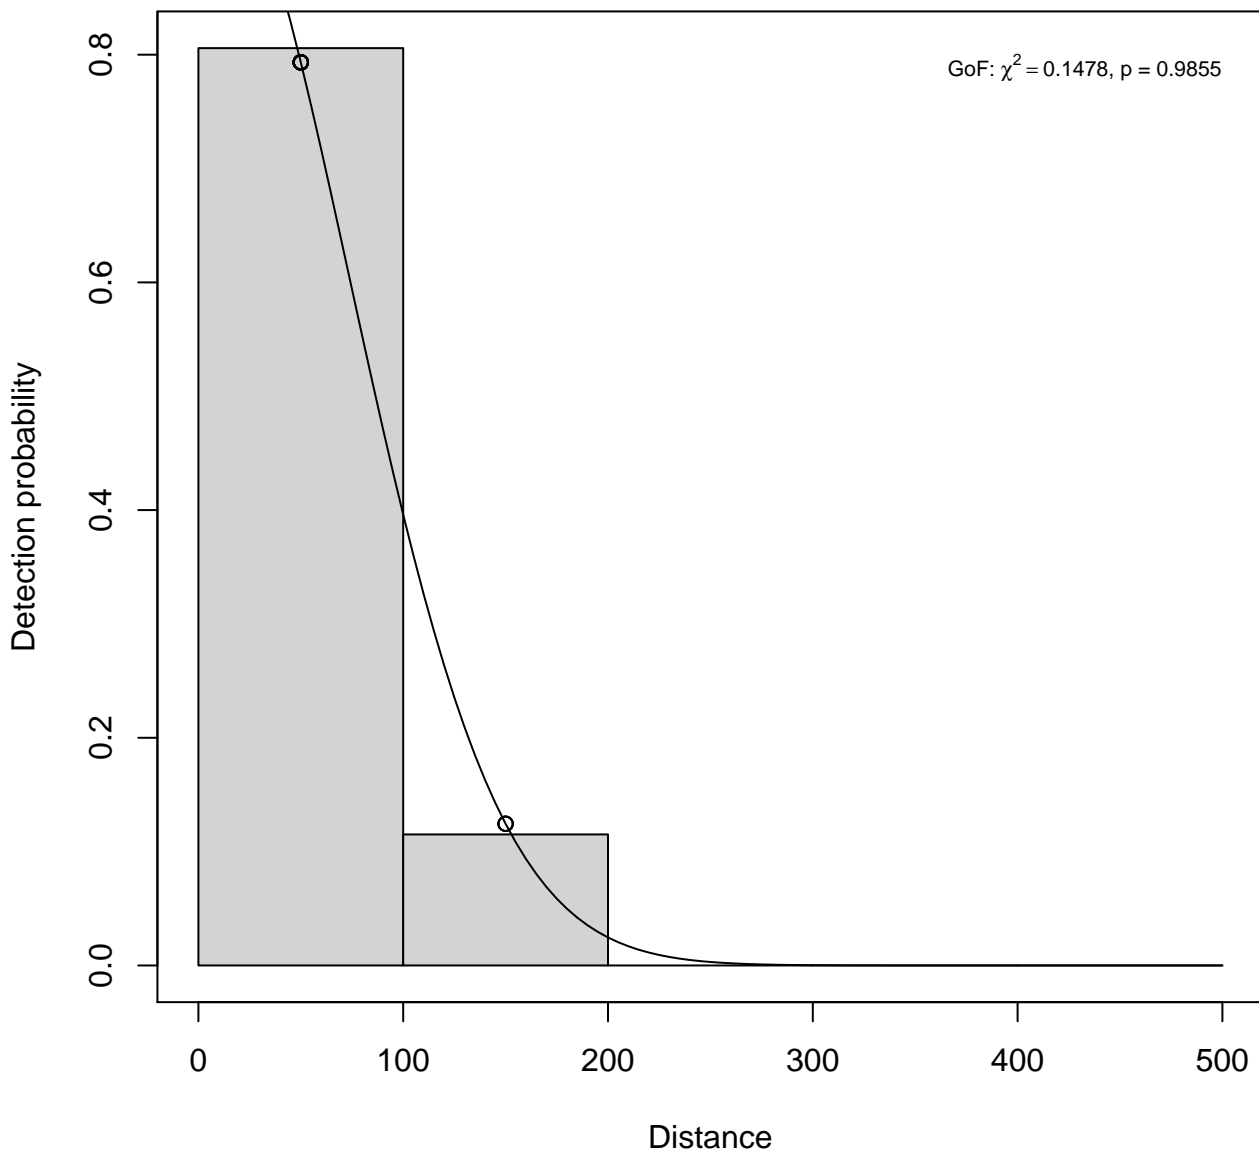

Supplement: s1 [file s1]
