# Supplementary material
Source: MDPI journal article supplement (https://www.mdpi.com/1424-2818/13/7/300)

# Brotoyeris jugularis – Cordillera Oriental montane forests – Colombia

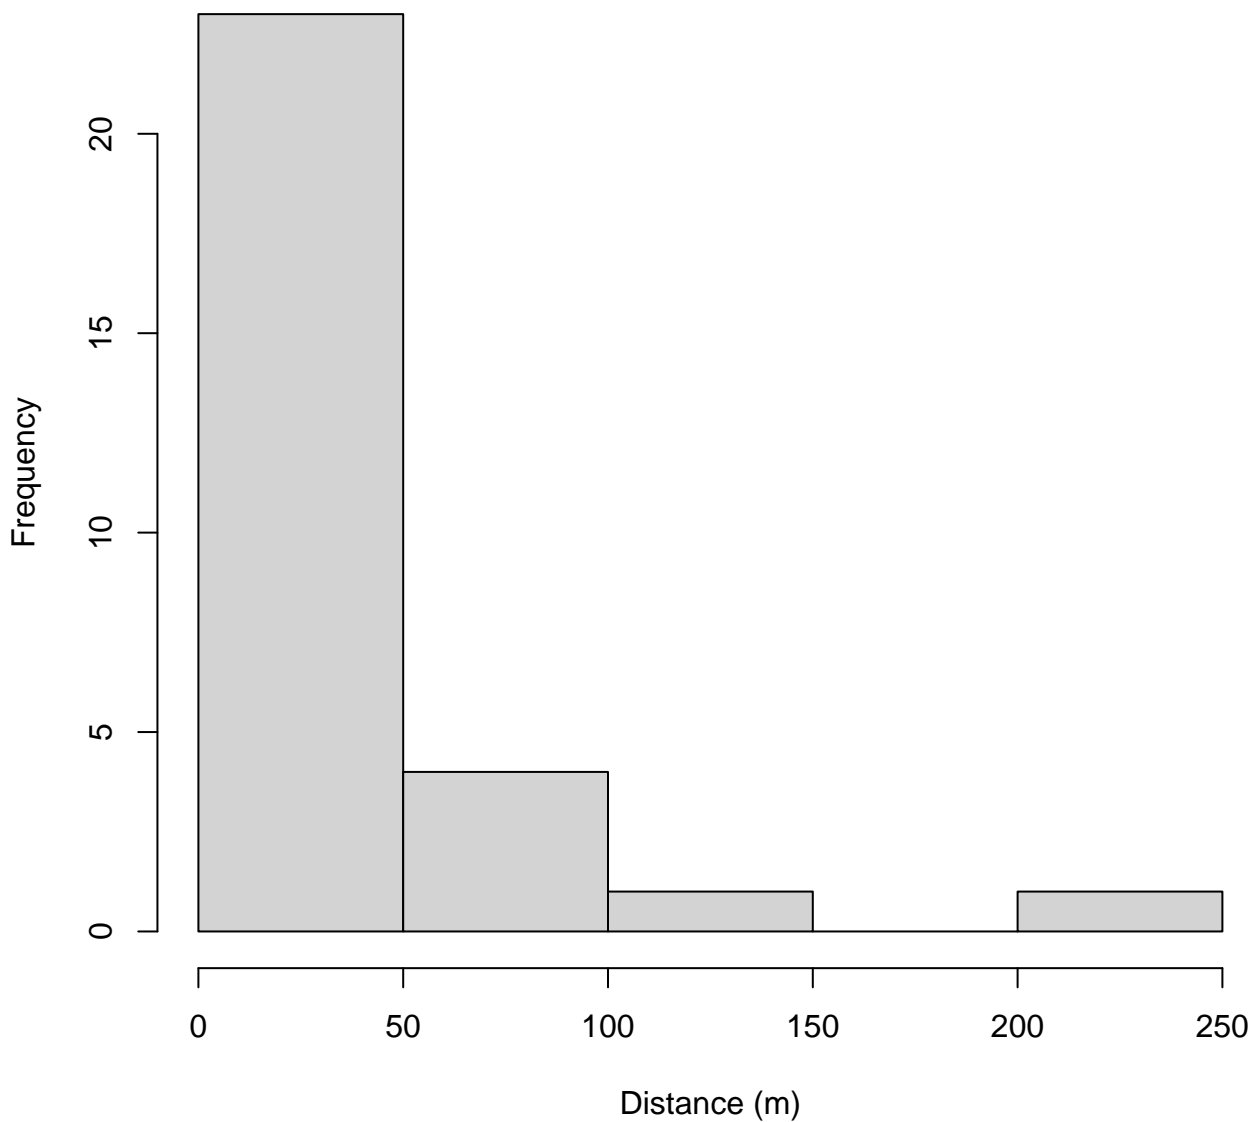

# Brotoyeris jugularis – Cordillera Oriental montane forests – Colombia

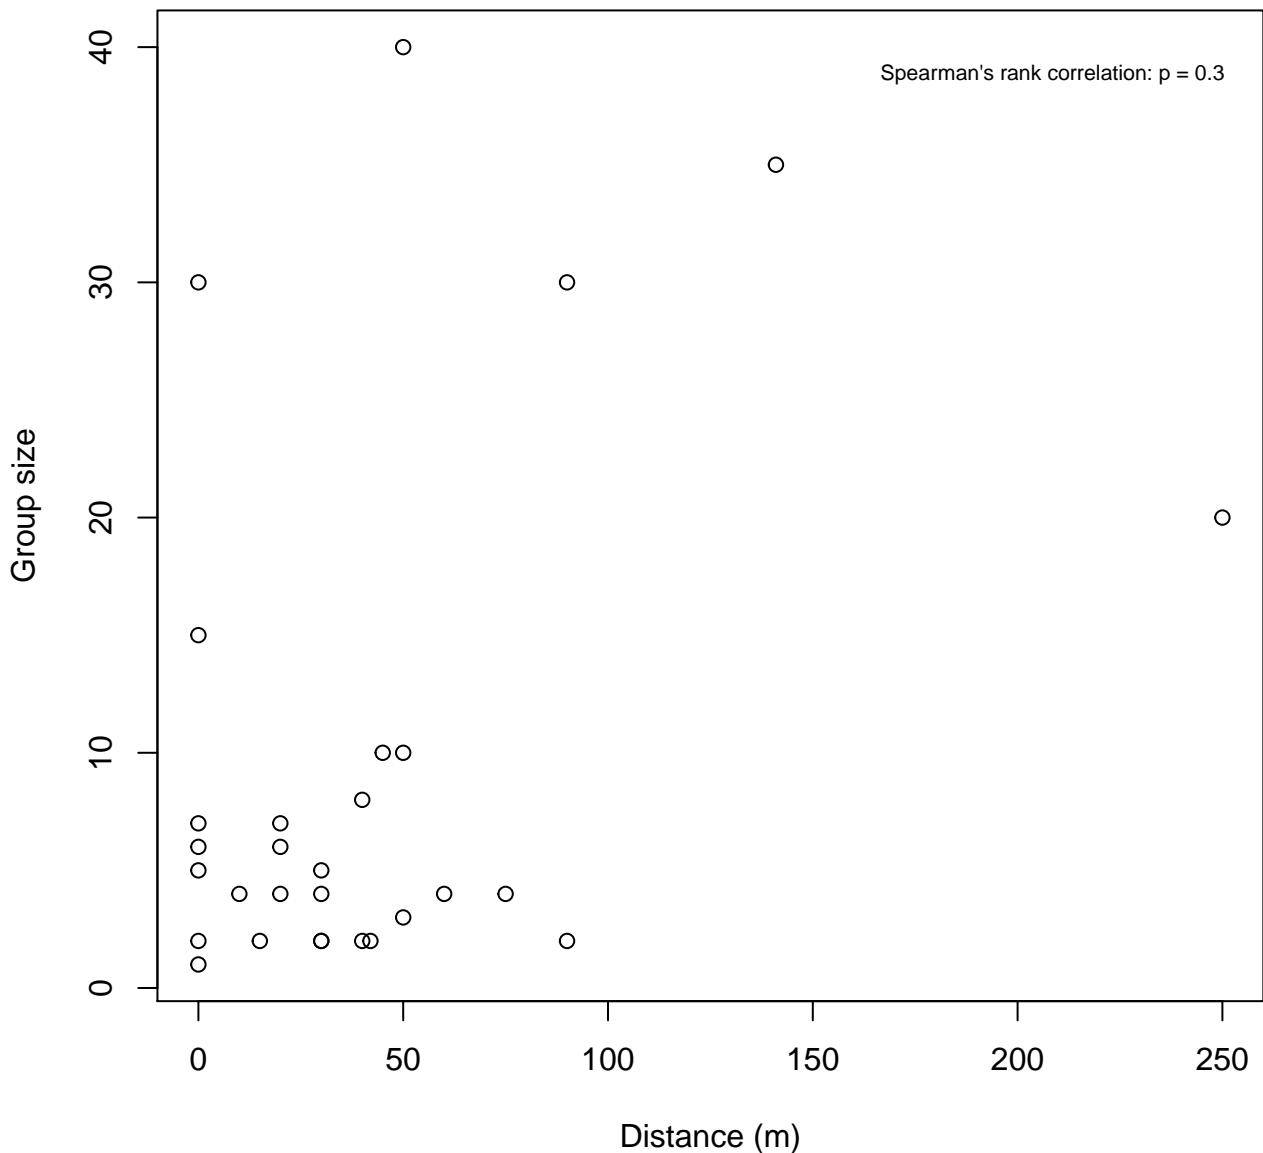

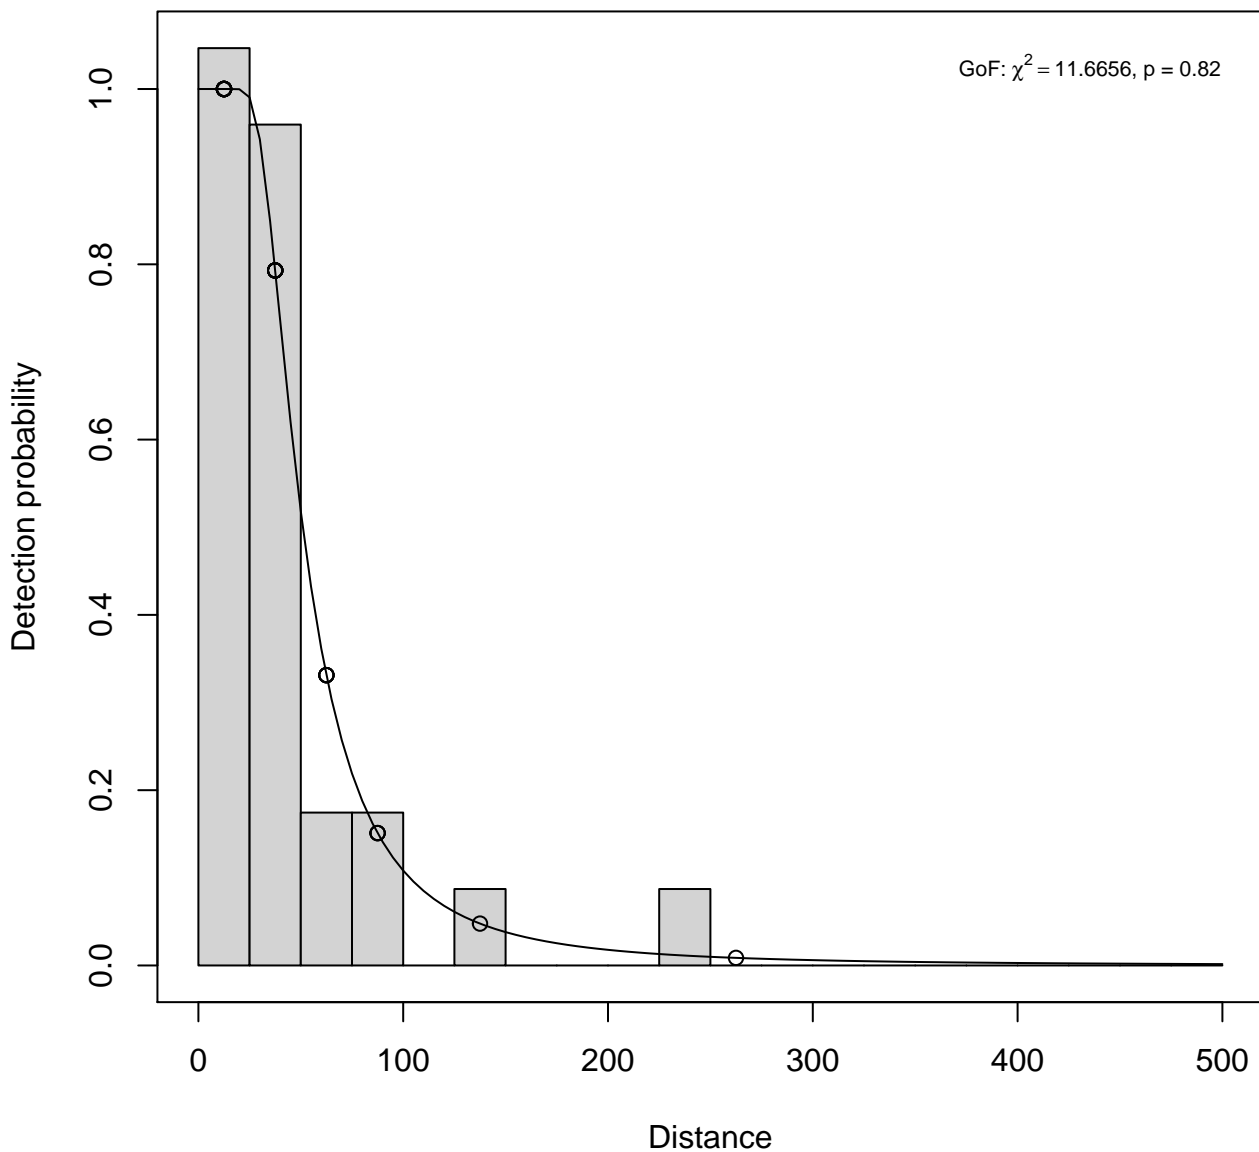

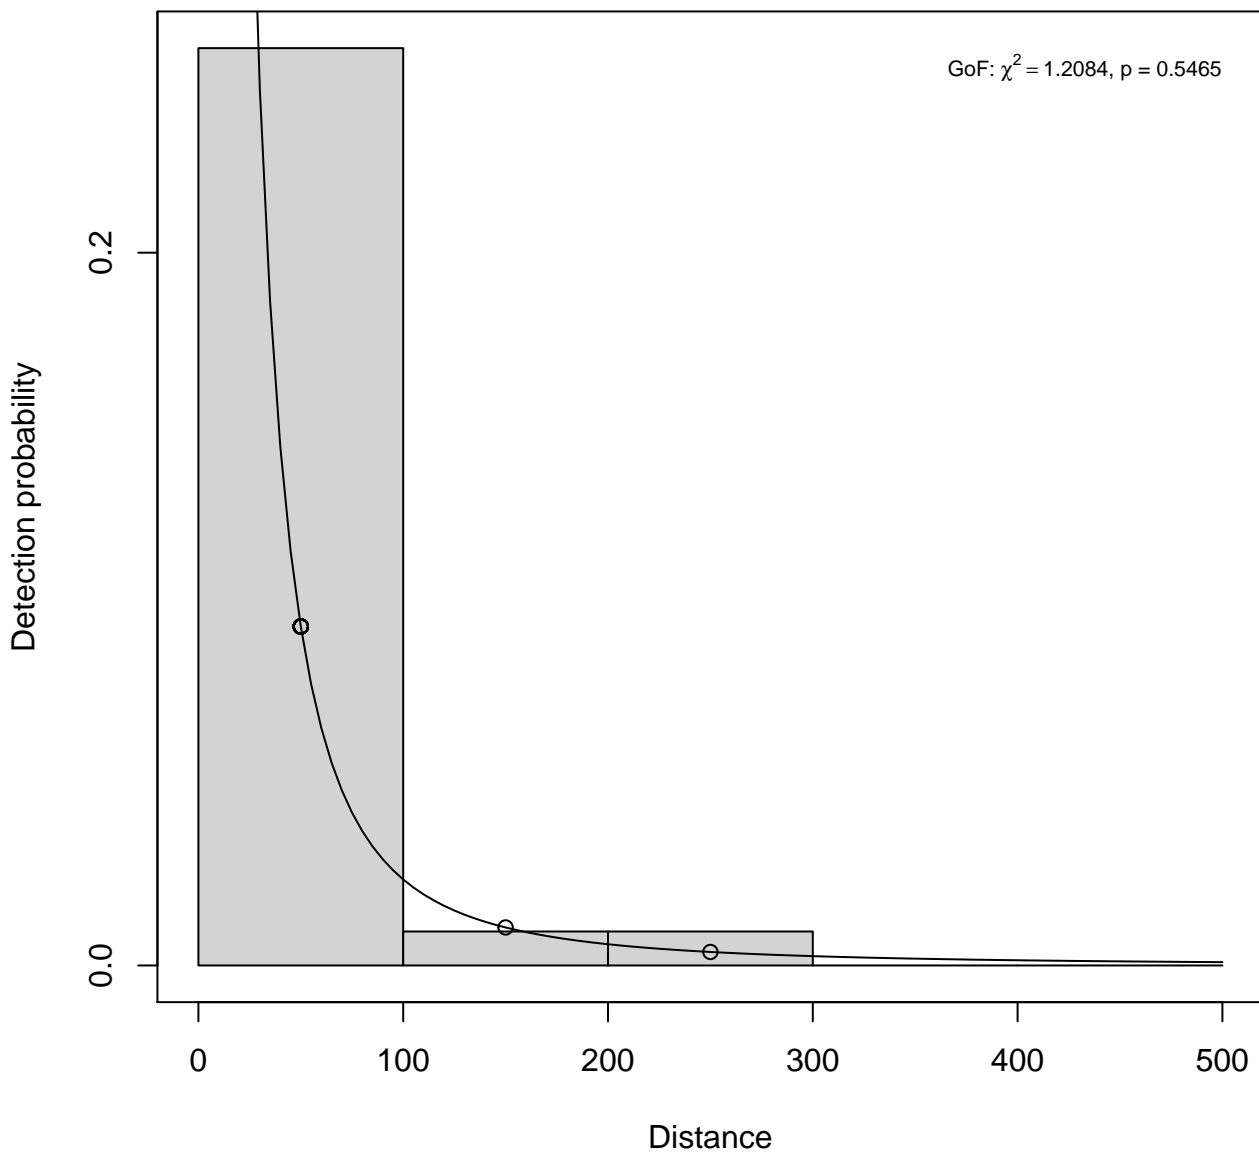

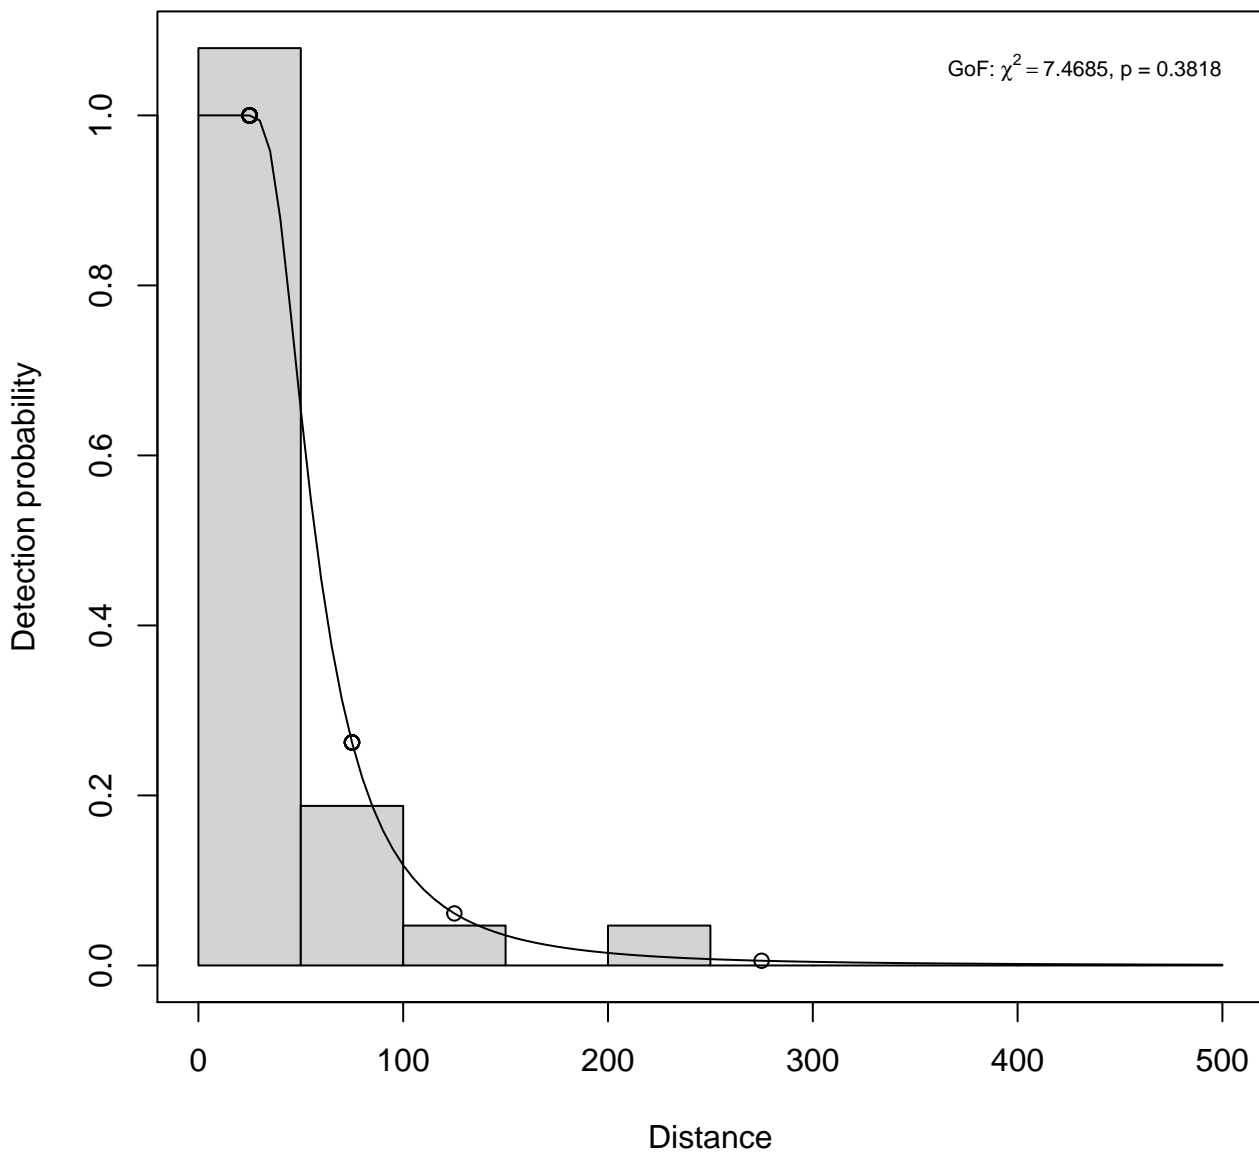

Supplement: s1 [file s1]
