# Supplementary material
Source: MDPI journal article supplement (https://www.mdpi.com/1424-2818/13/7/300)

**Trichoglossus haematodus – Eastern Australian temperate forests – Australia**

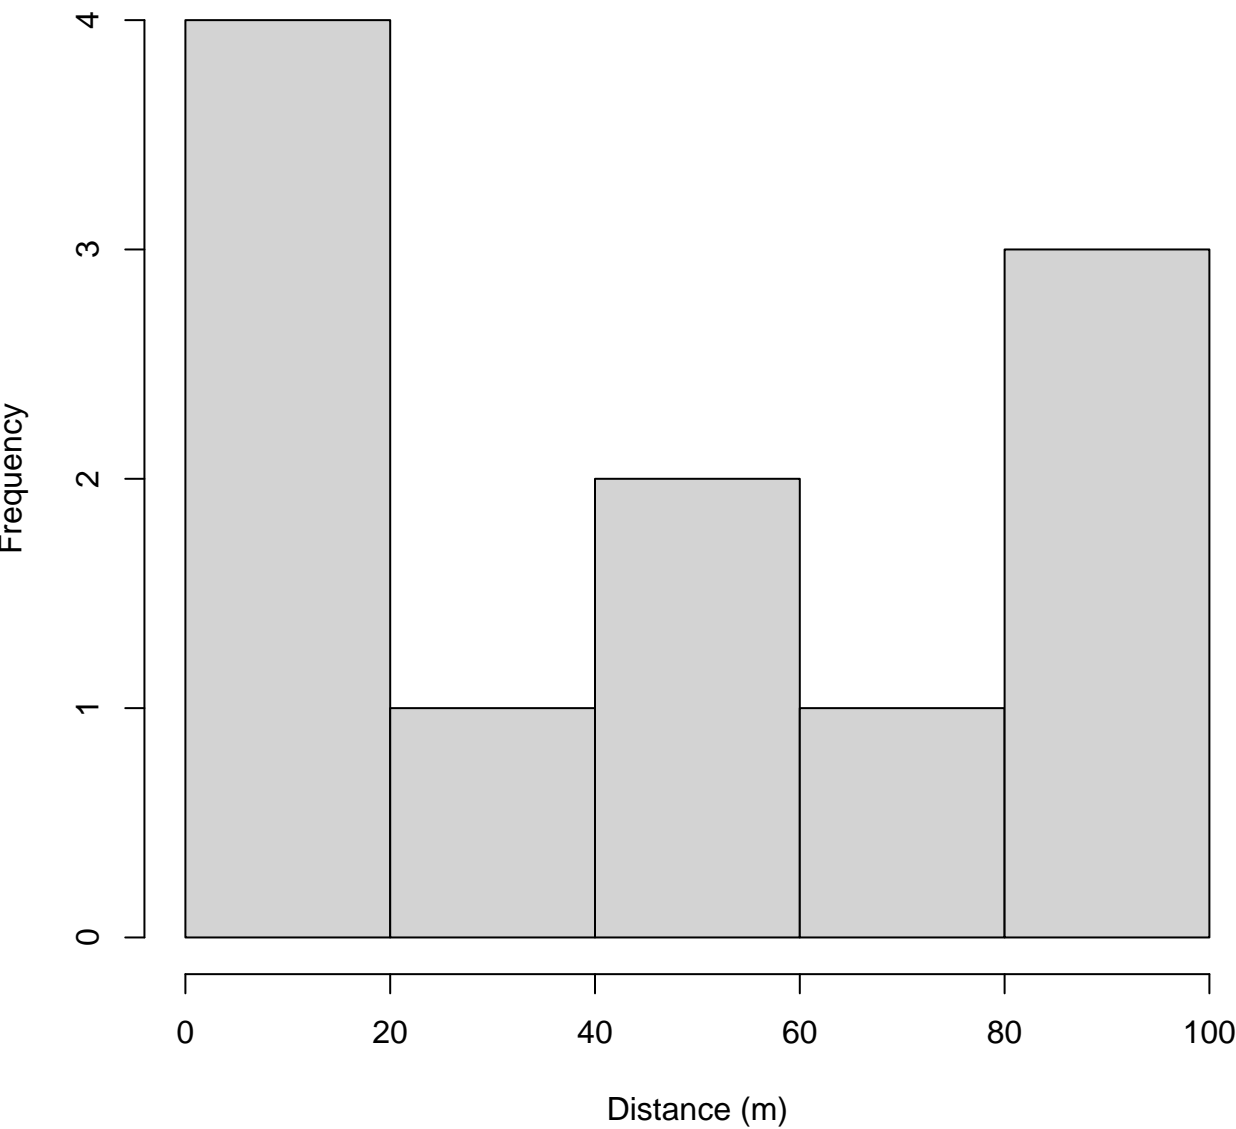

**Trichoglossus haematodus – Eastern Australian temperate forests – Australia**

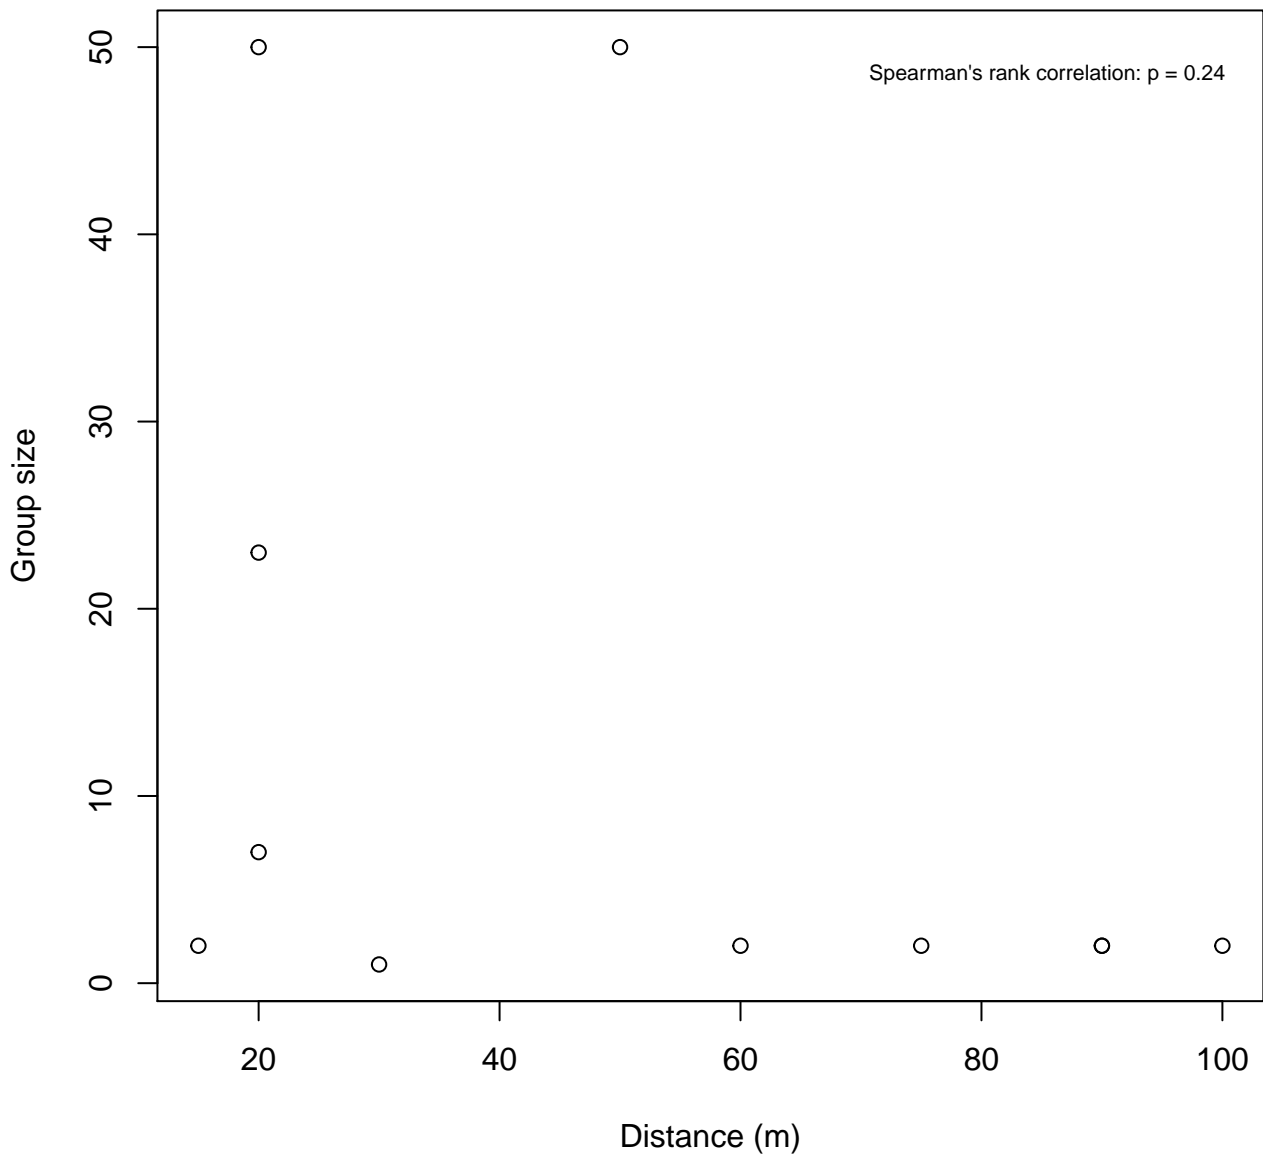

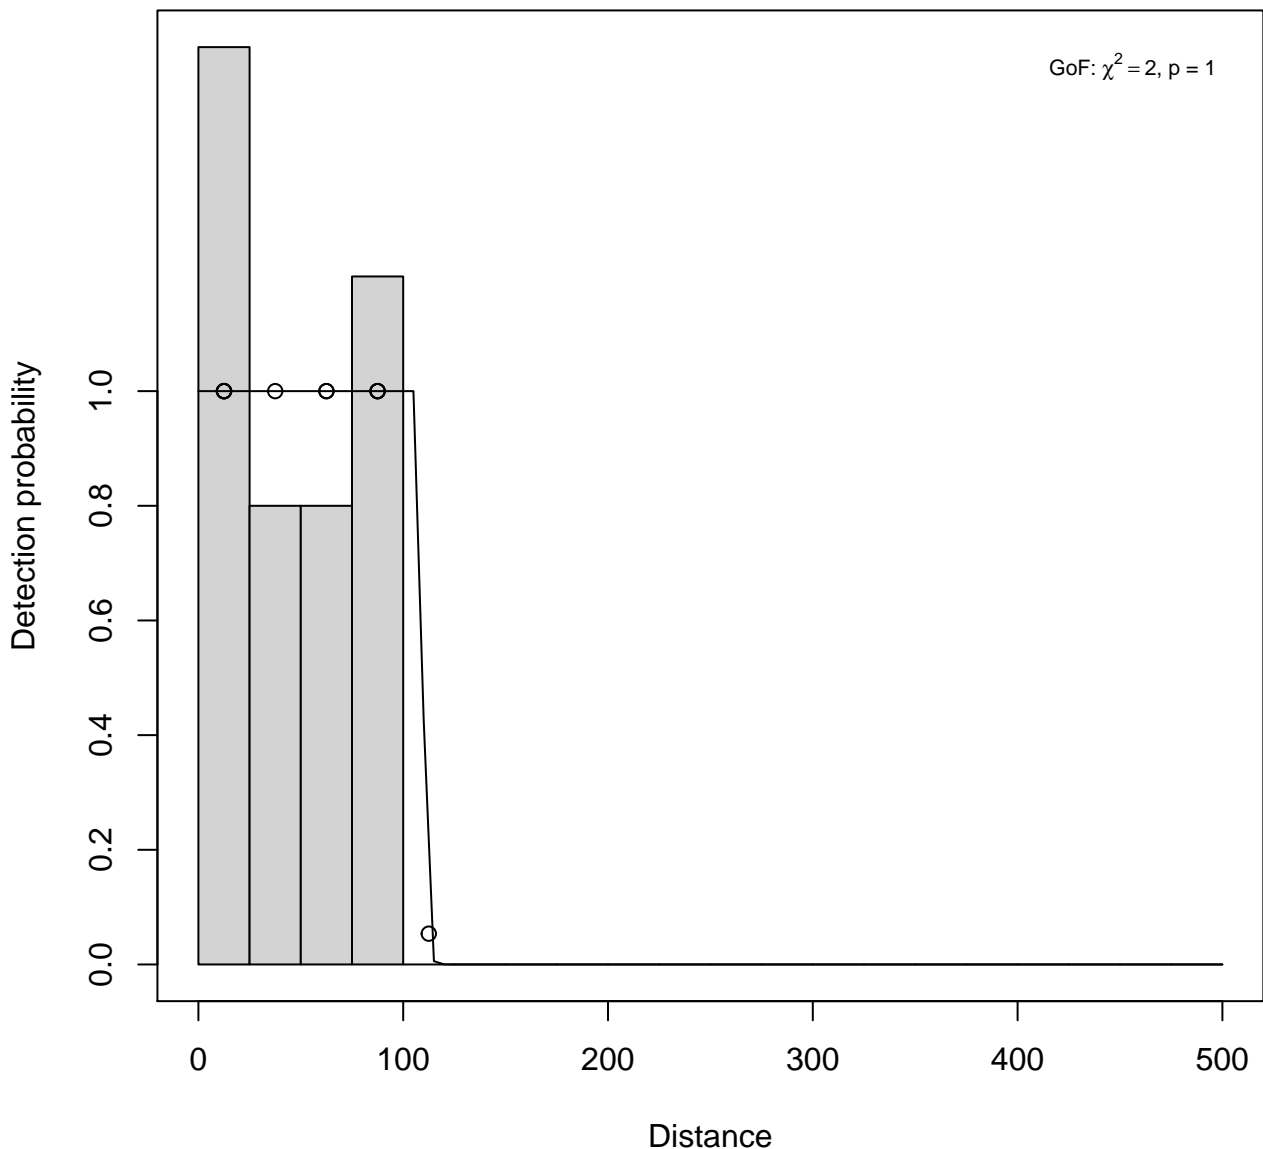

Trichoglossus haematodus – Eastern Australian temperate forests – Australia (N = 11, key function = hn)

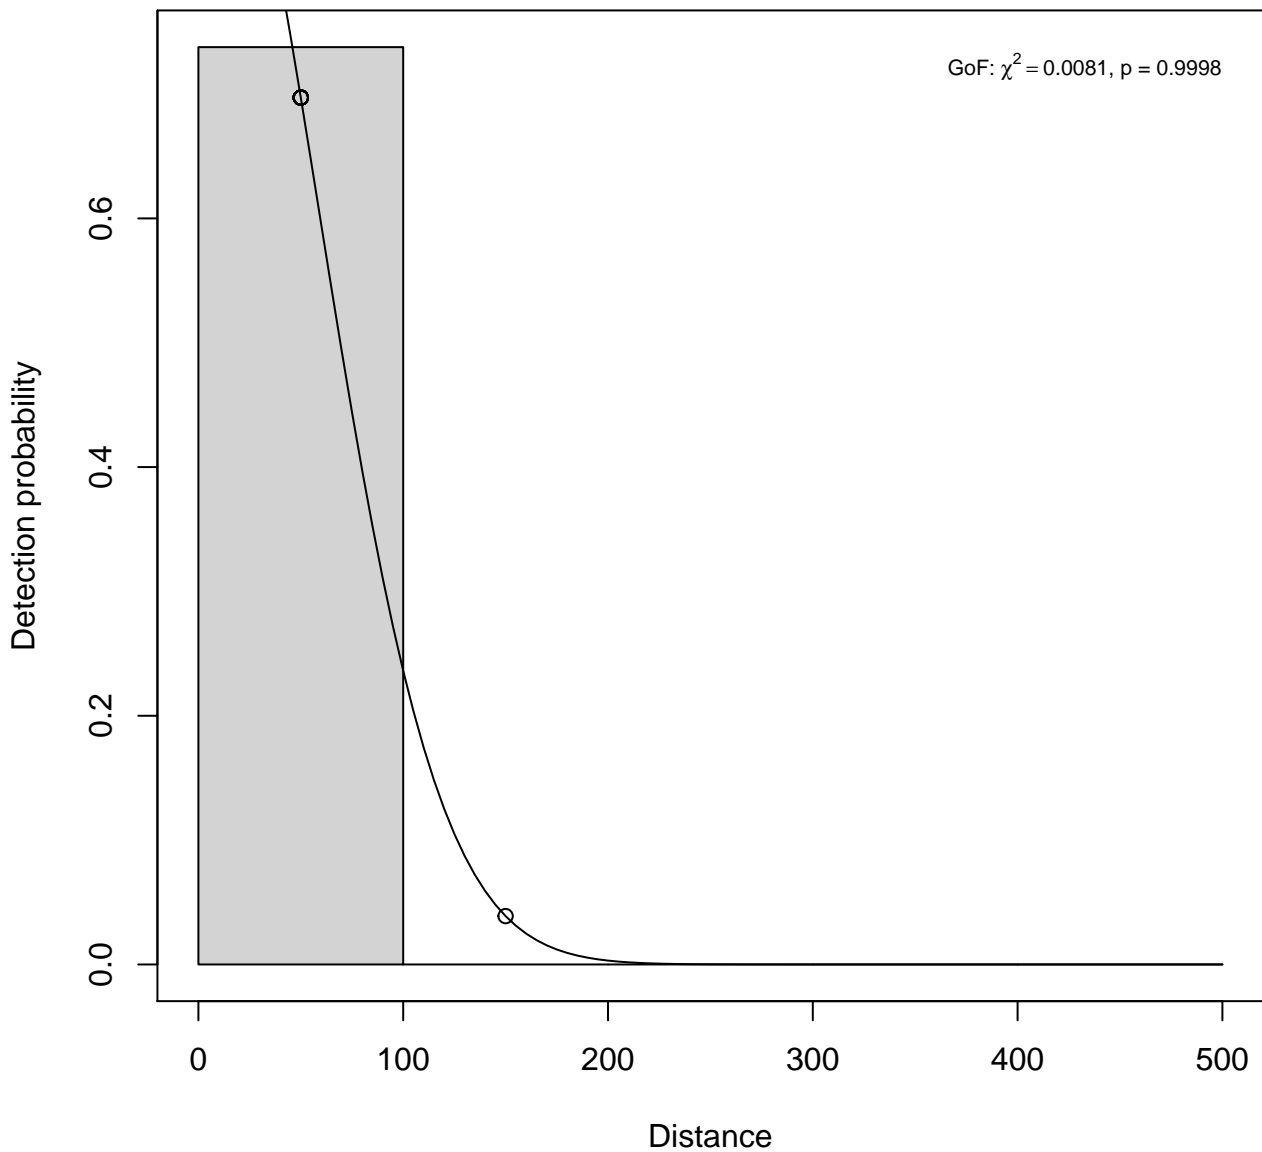

Trichoglossus haematodus – Eastern Australian temperate forests – Australia (N = 11, key function = hn)

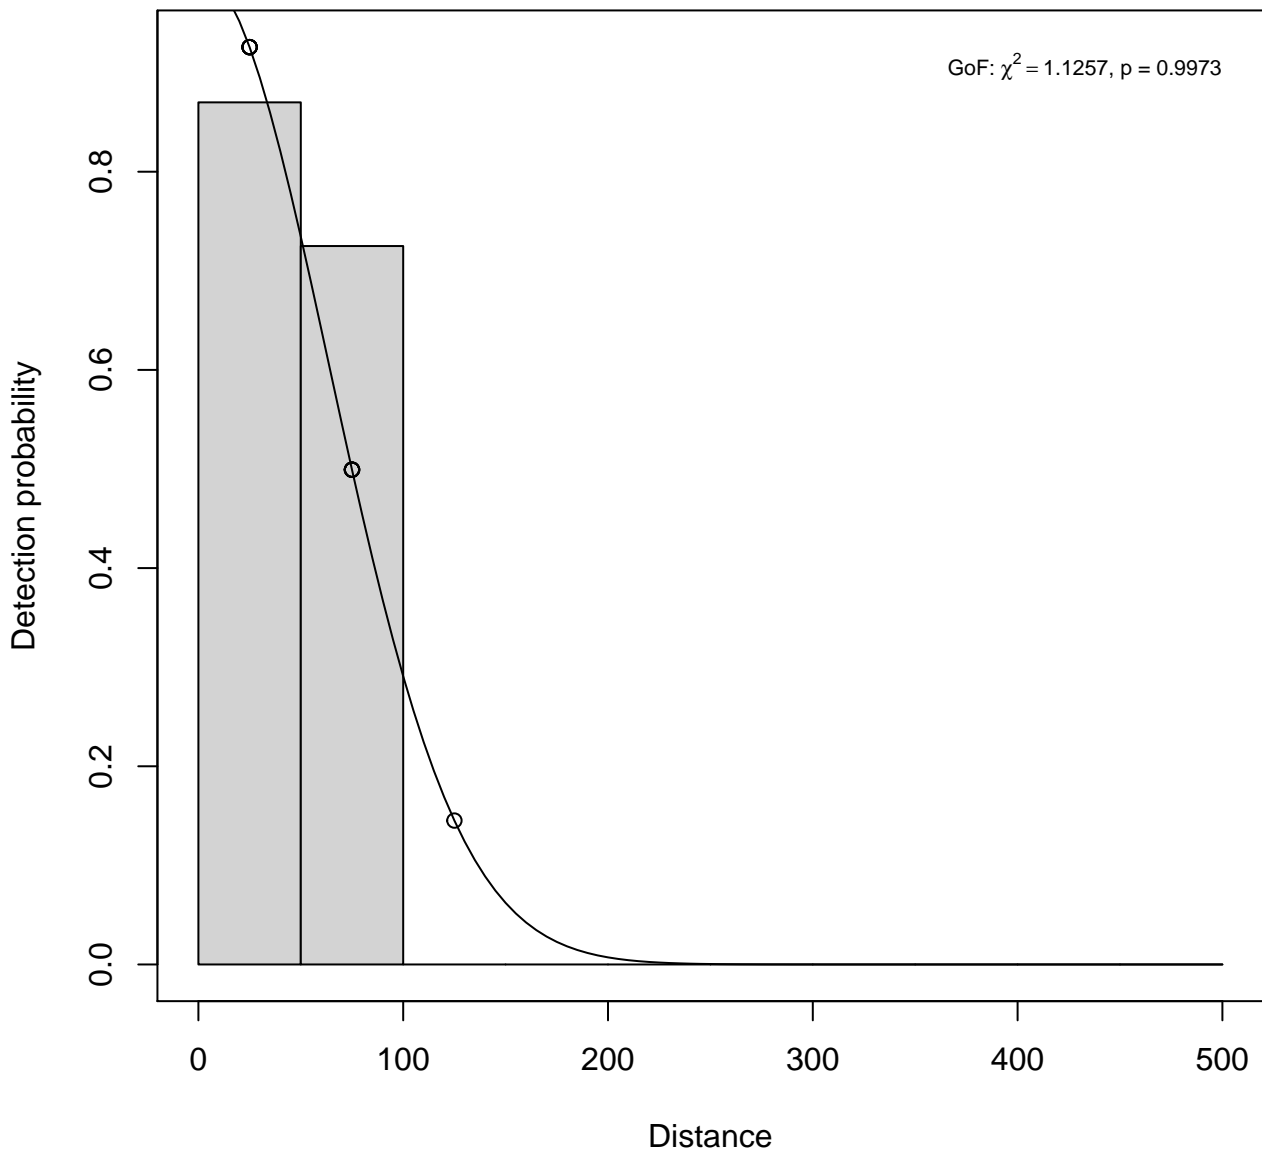

Supplement: s1 [file s1]
