# Supplementary material
Source: MDPI journal article supplement (https://www.mdpi.com/1424-2818/13/7/300)

# **Psittacara finschi – Isthmian–Atlantic moist forests – Costa Rica**

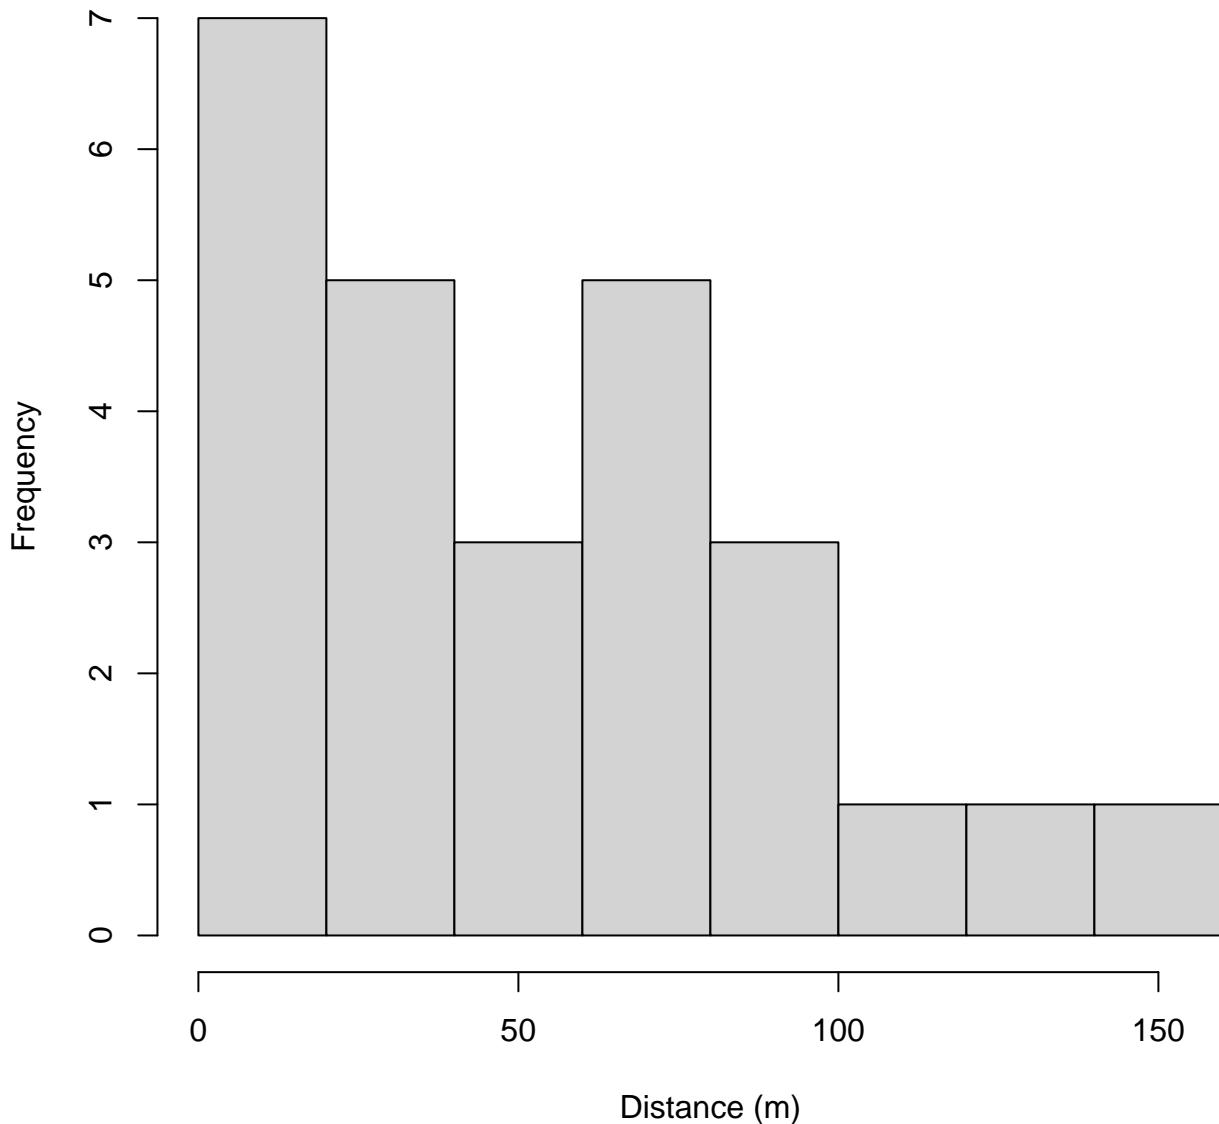

# Psittacara finschi – Isthmian–Atlantic moist forests – Costa Rica

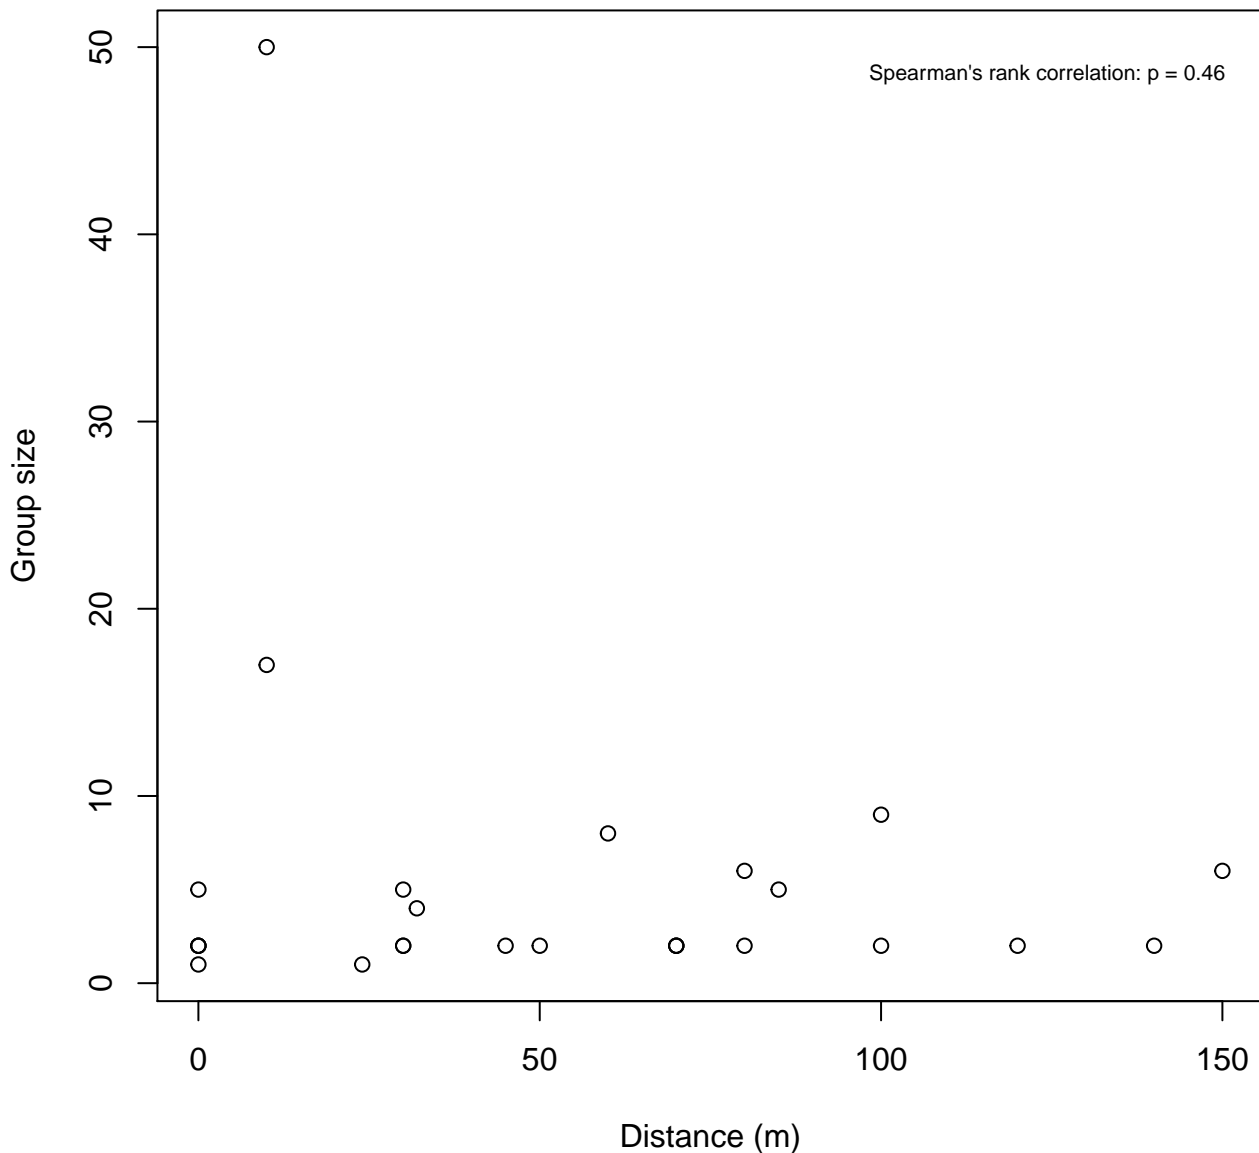

*Psittacara finschi* – Isthmian–Atlantic moist forests – Costa Rica (N = 26, key function = hn)

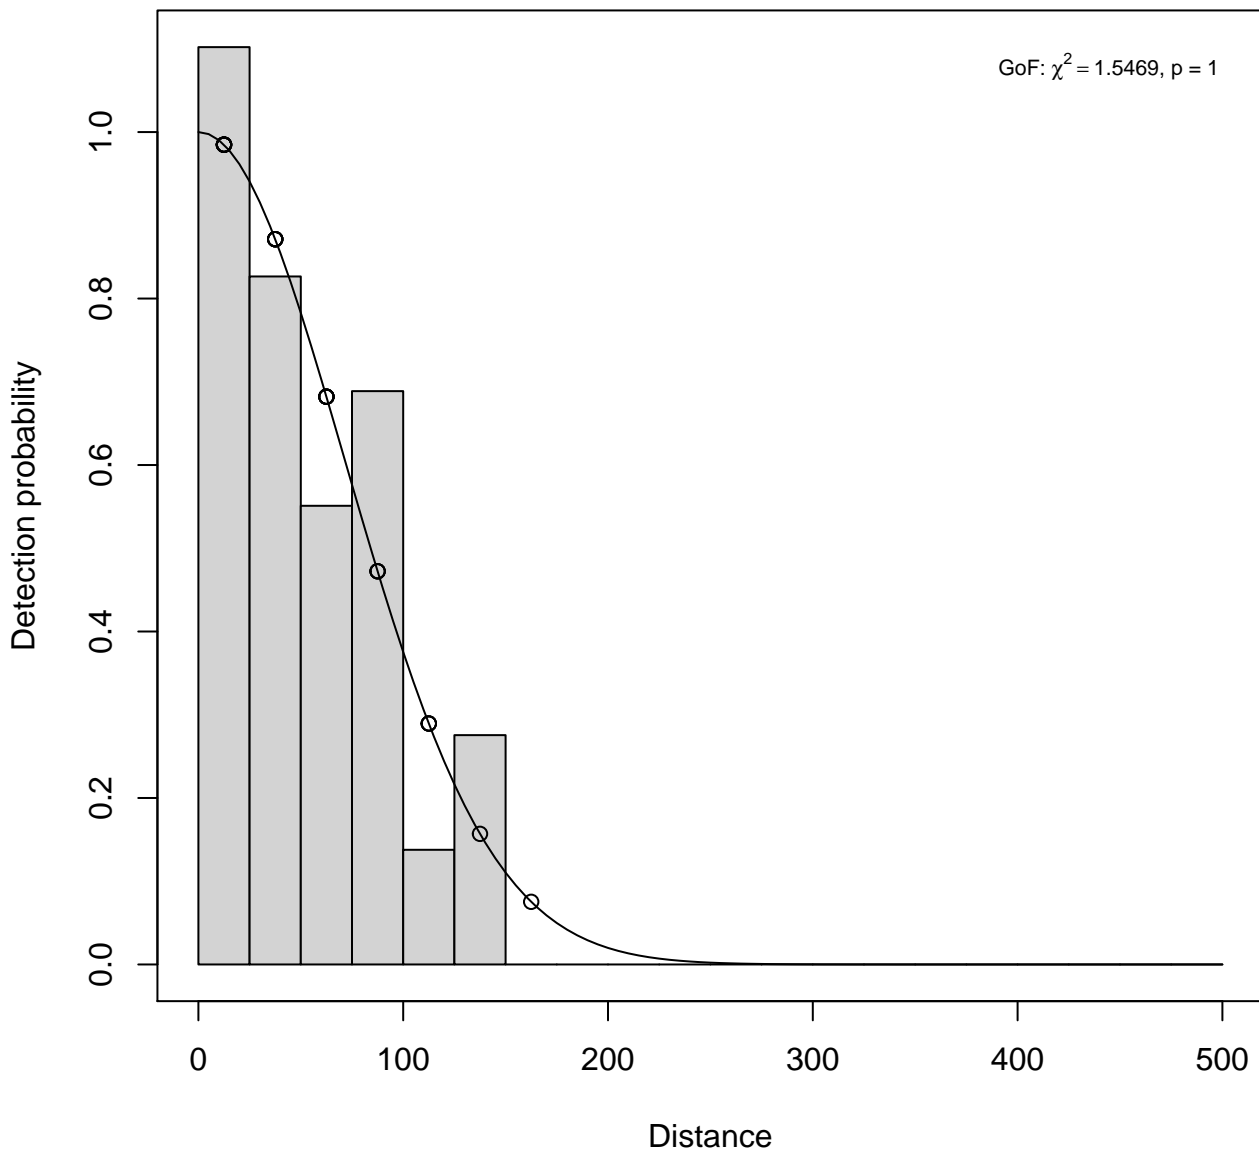

*Psittacara finschi* – Isthmian–Atlantic moist forests – Costa Rica (N = 26, key function = hn)

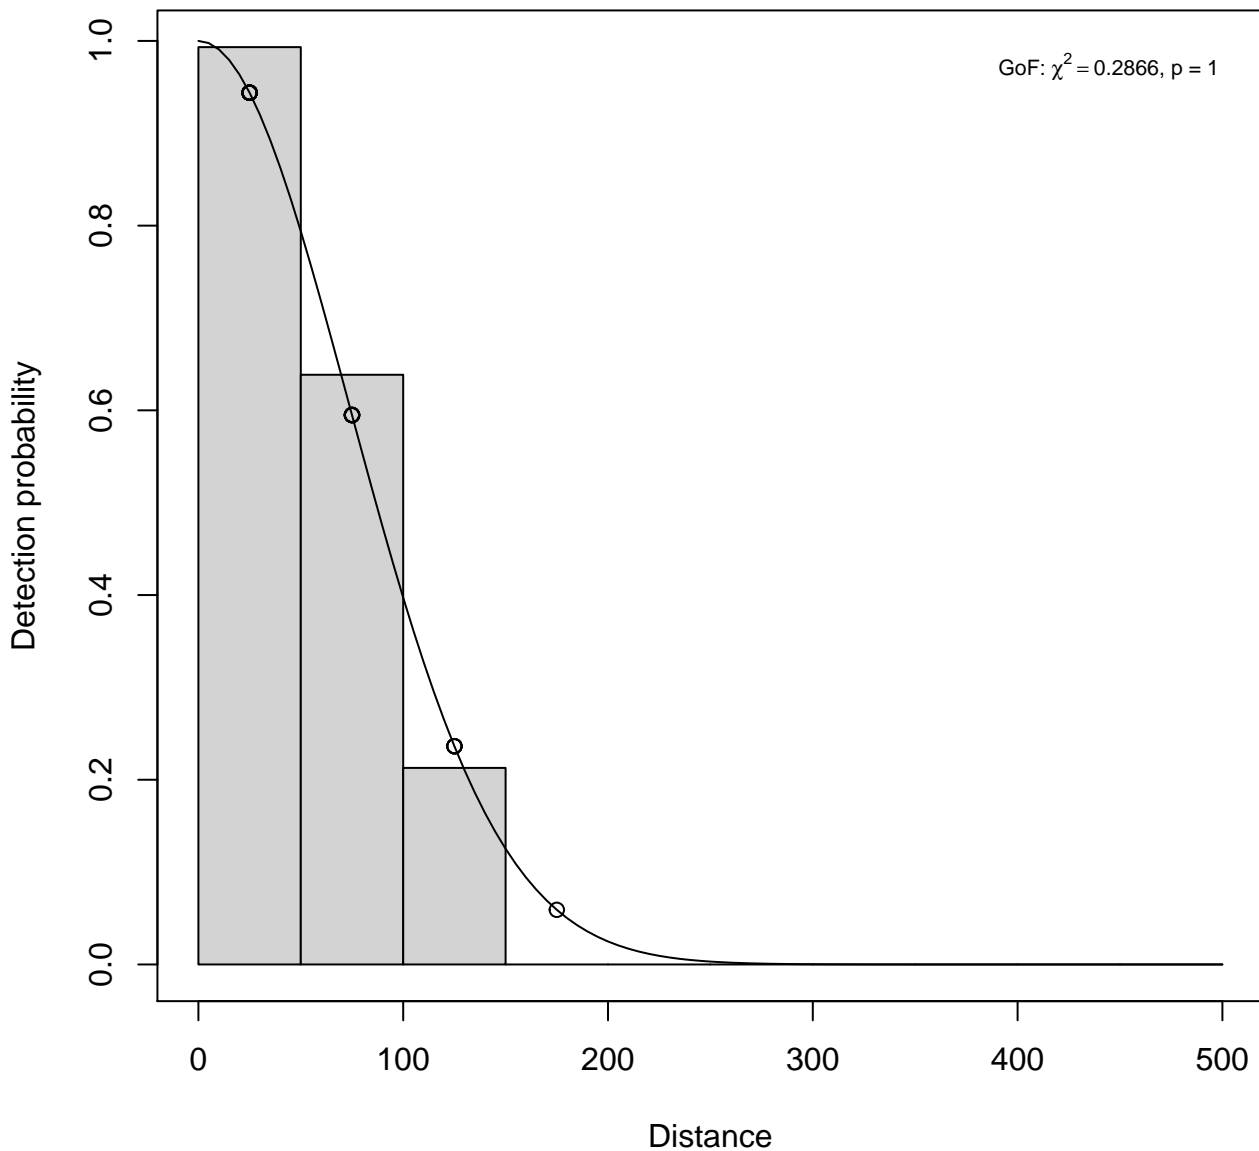

*Psittacara finschi* – Isthmian–Atlantic moist forests – Costa Rica (N = 26, key function = hn)

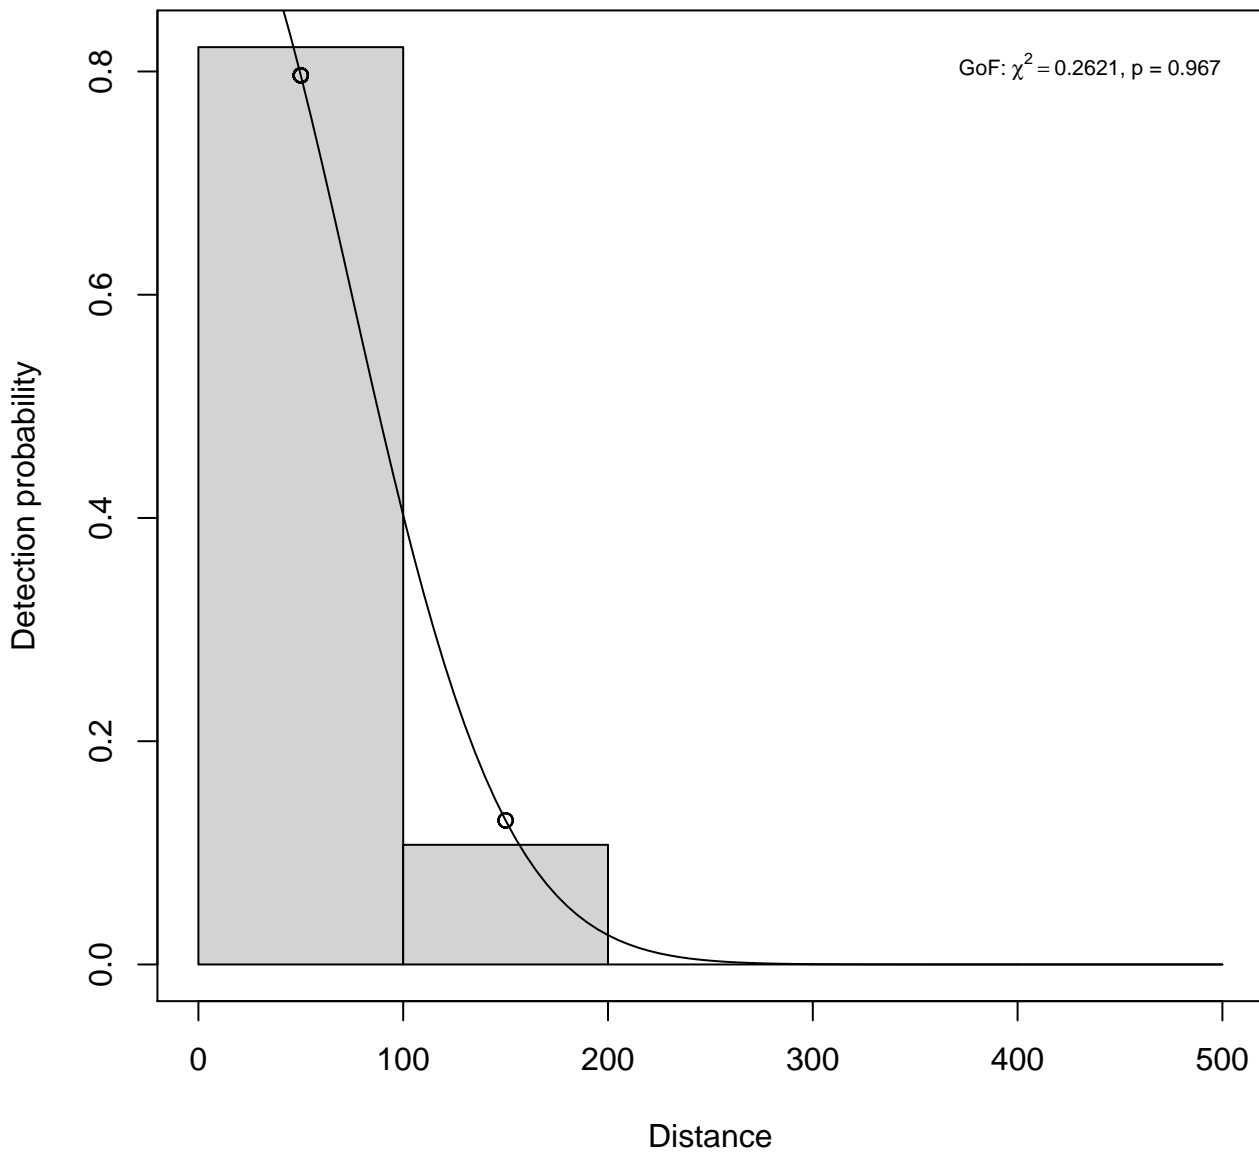

Supplement: s1 [file s1]
