# Supplementary material
Source: MDPI journal article supplement (https://www.mdpi.com/1424-2818/13/7/300)

# Enicognathus leptorhynchus – Valdivian temperate forests – Chile

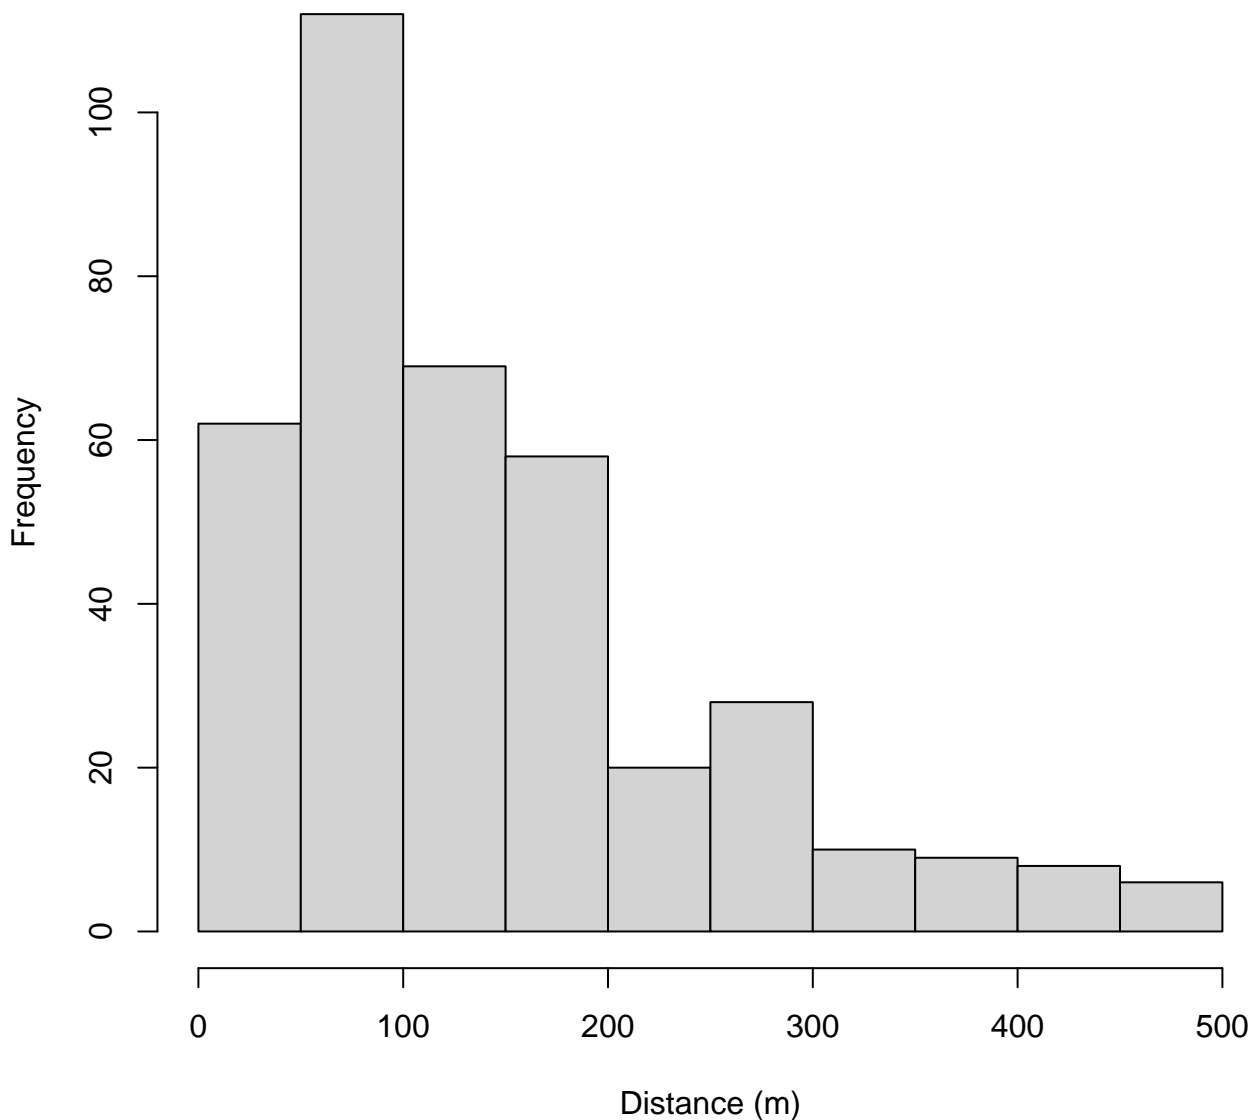

# Enicognathus leptorhynchus – Valdivian temperate forests – Chile

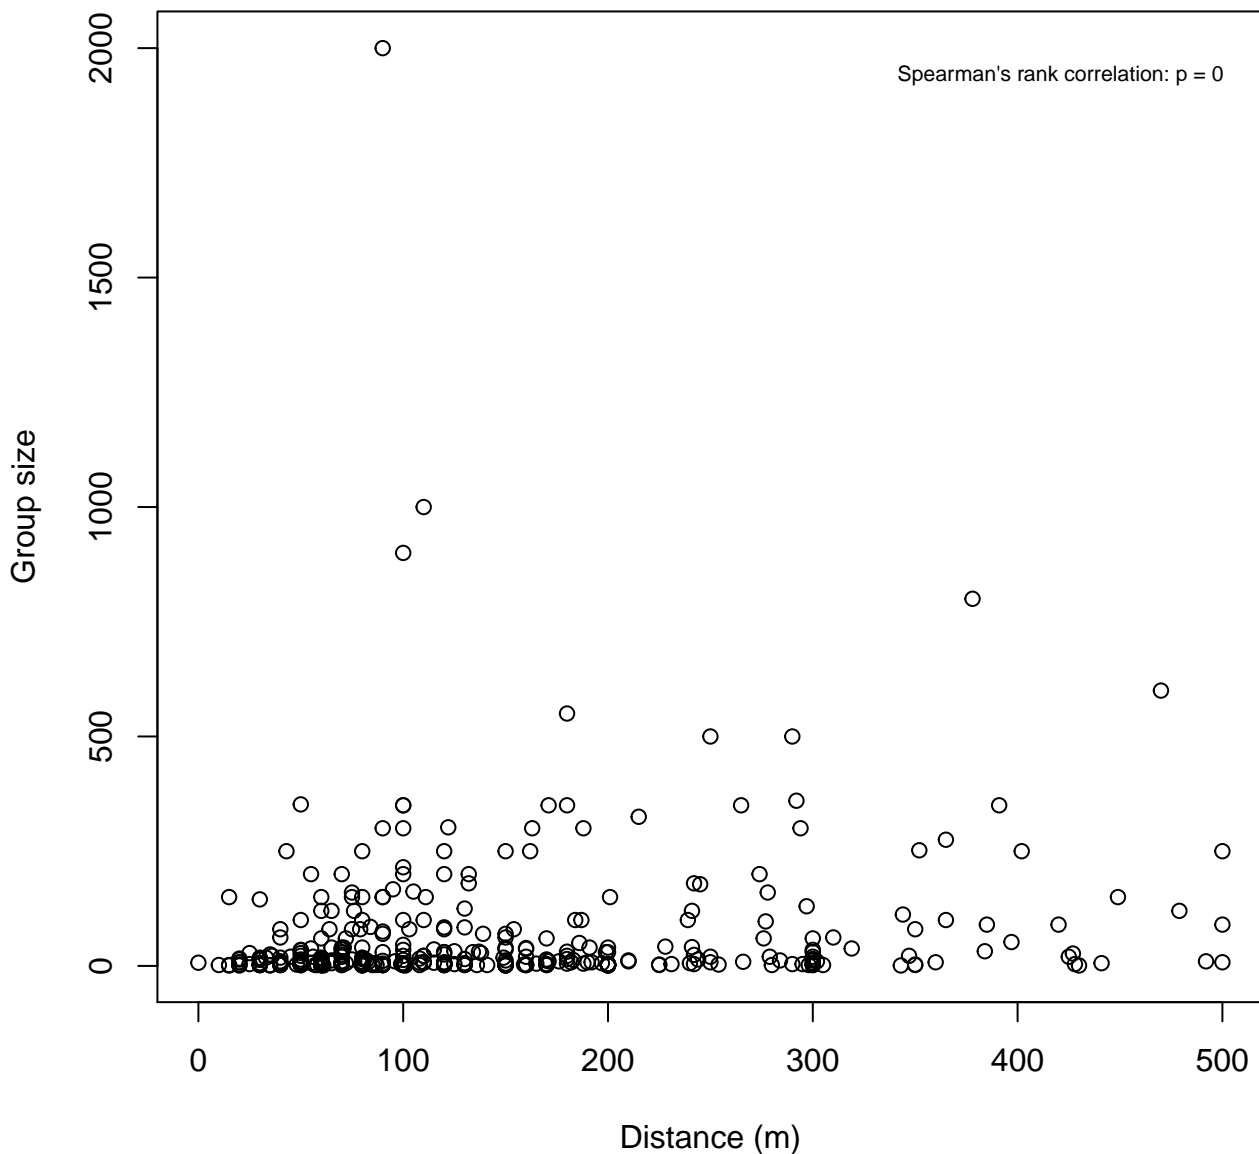

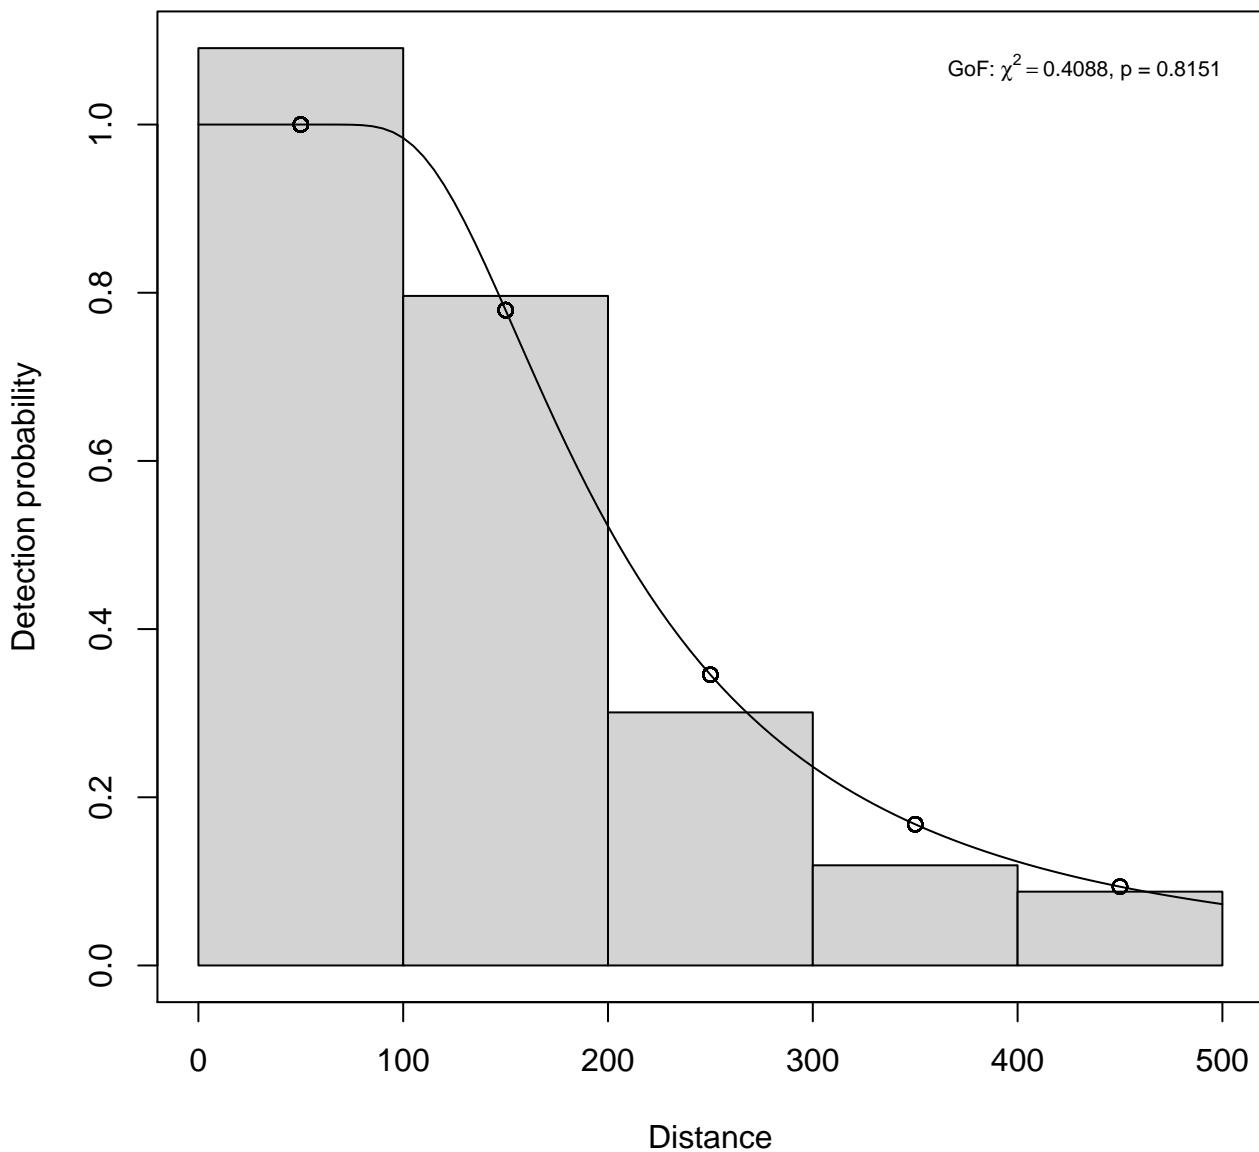

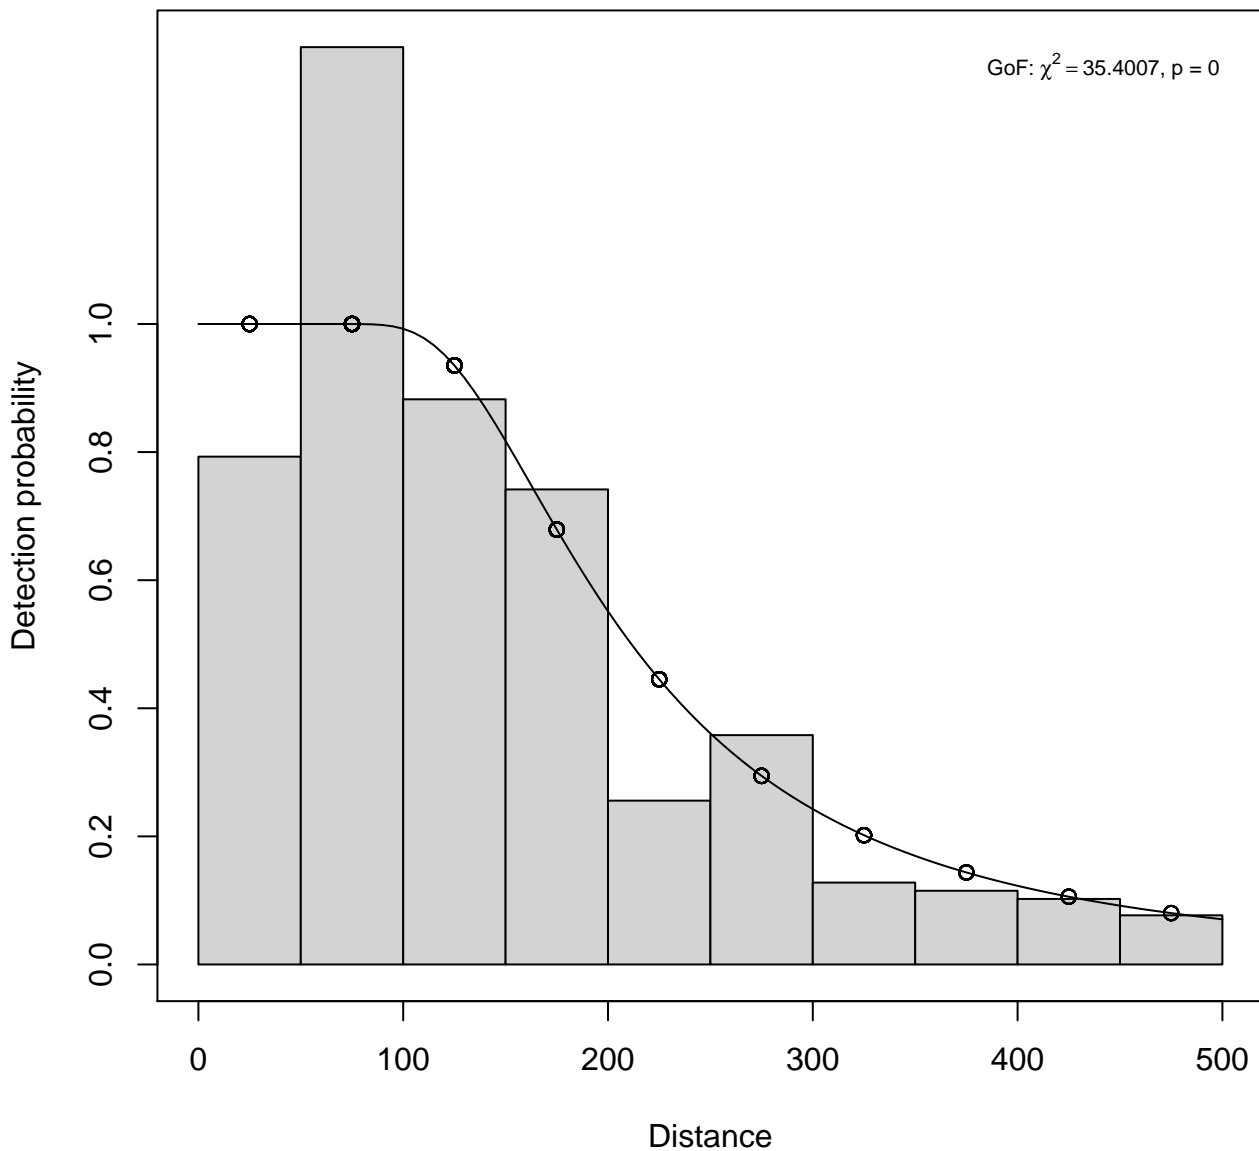

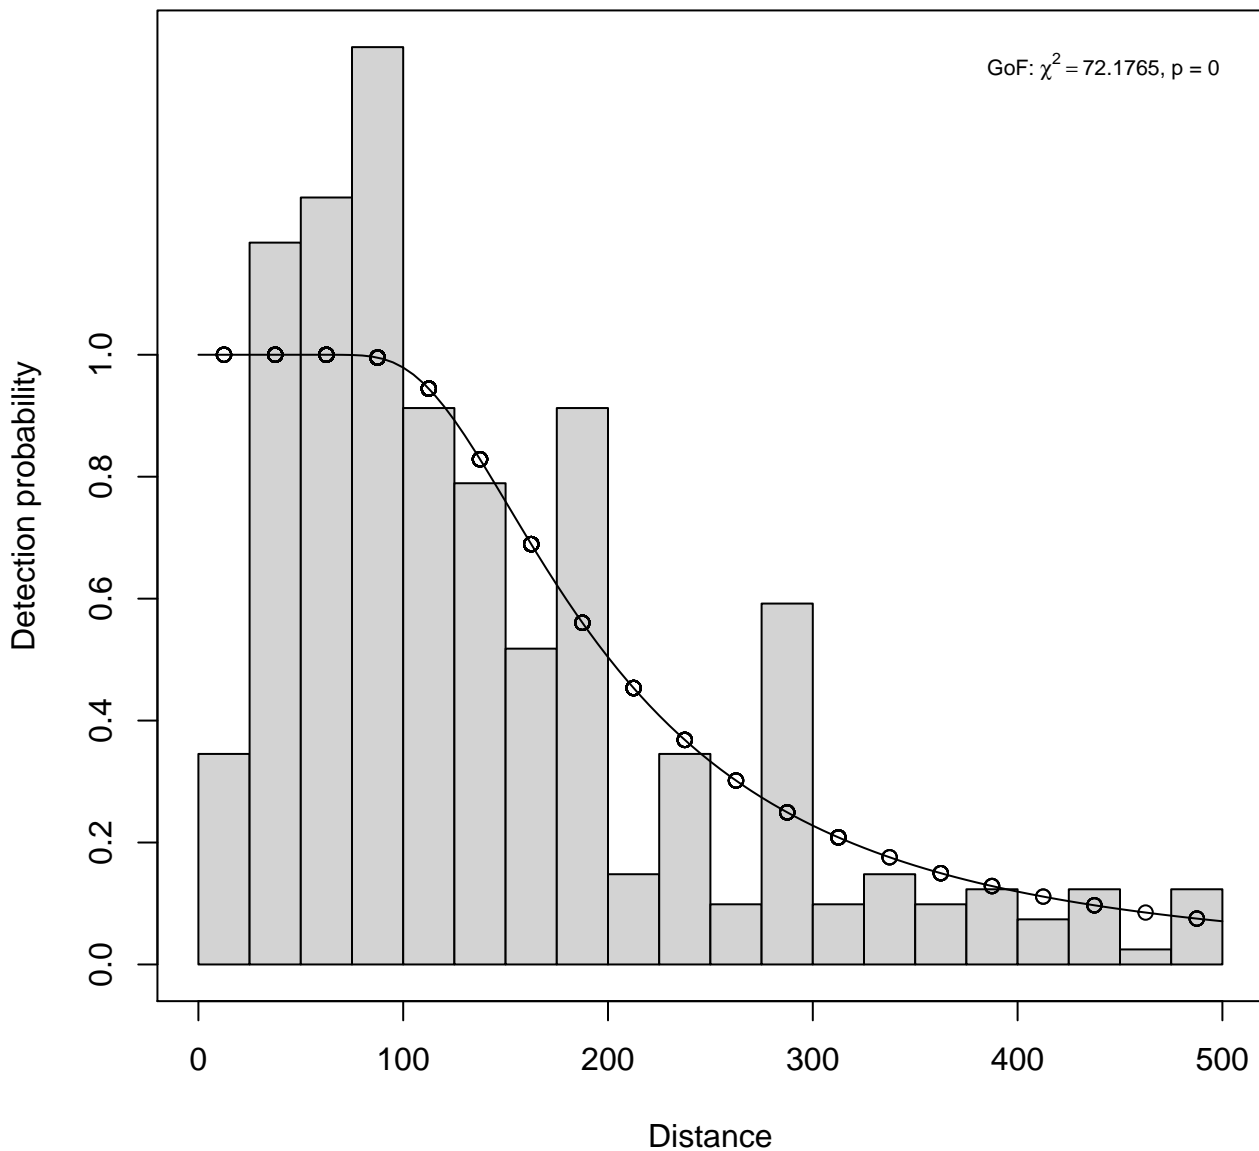

Supplement: s1 [file s1]
