# Supplementary material
Source: MDPI journal article supplement (https://www.mdpi.com/1424-2818/13/7/300)

# **Brotogeris chiriri – Mato Grosso tropical dry forests – Brazil**

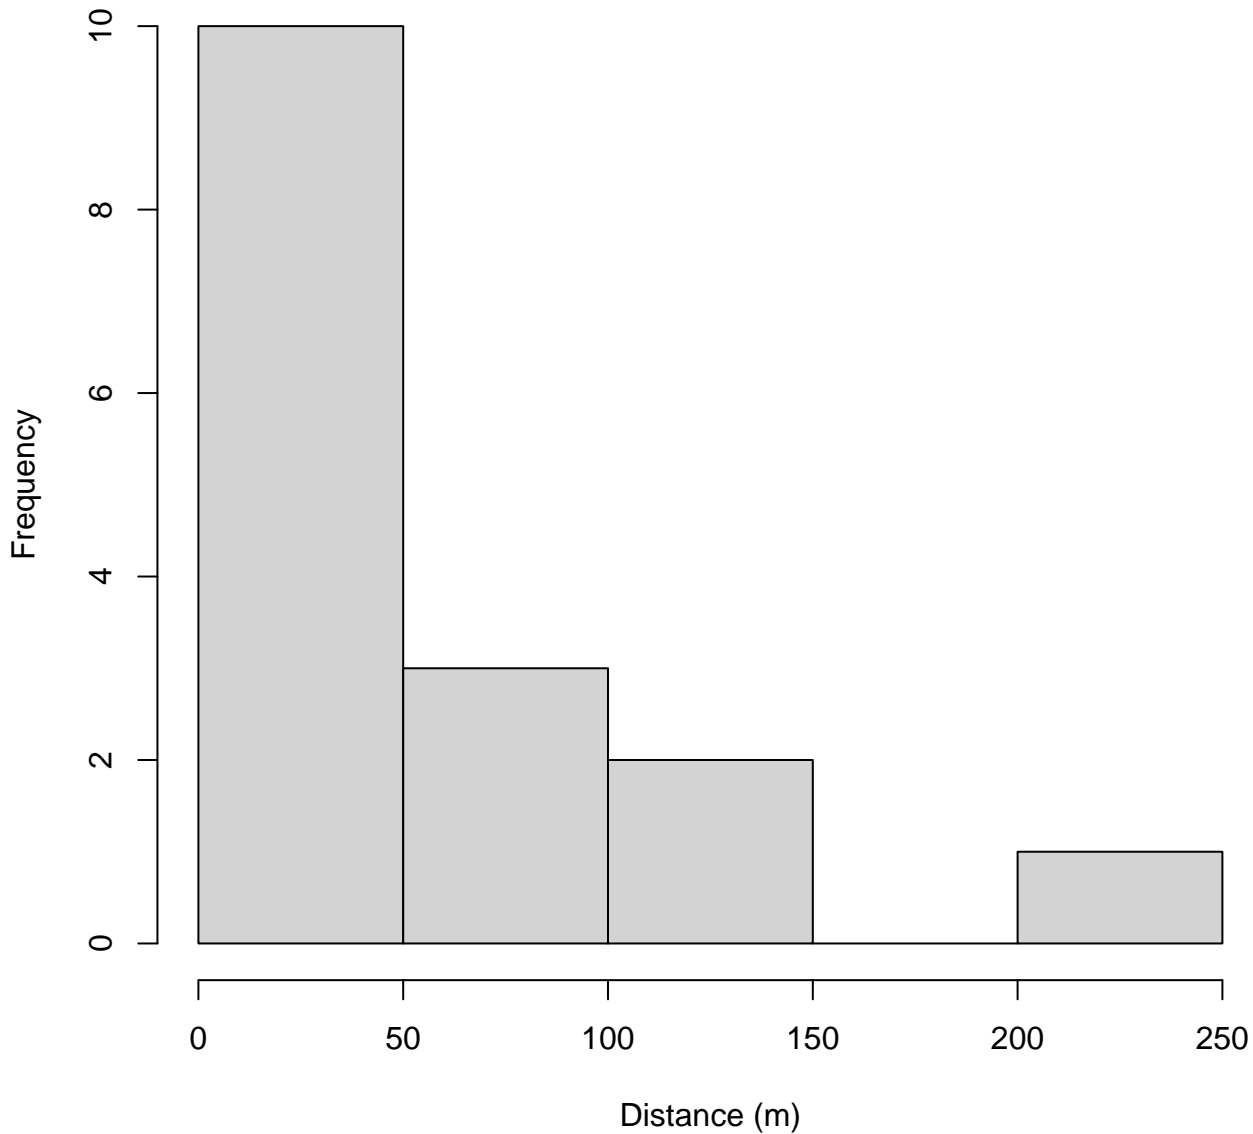

# **Brotogeris chiriri – Mato Grosso tropical dry forests – Brazil**

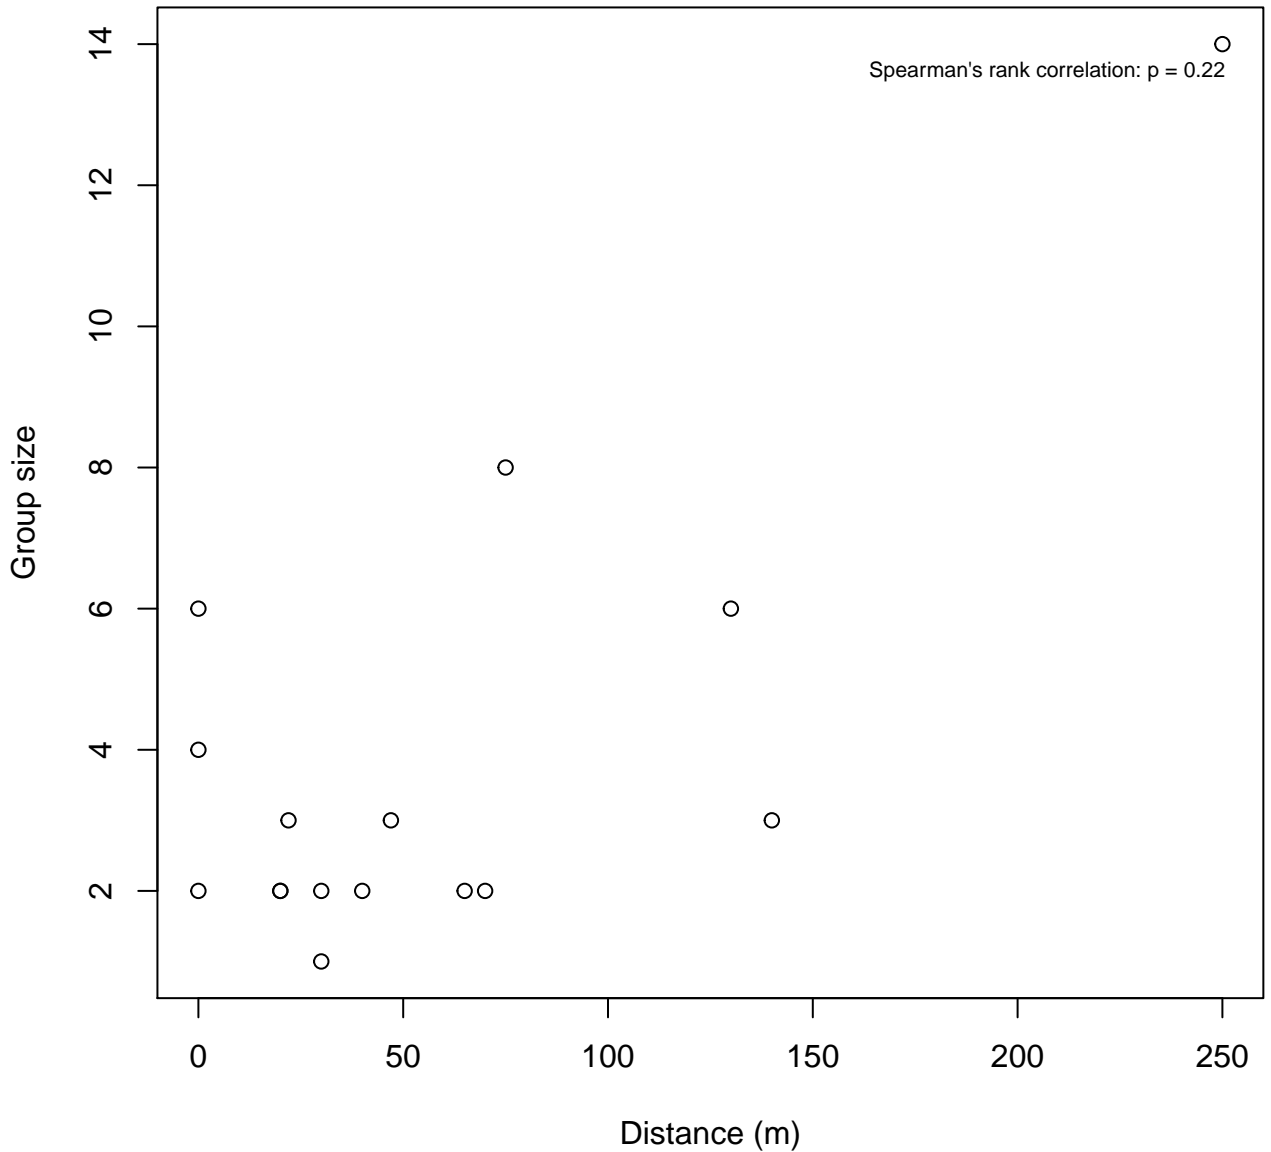

Brotojeris chiriri – Mato Grosso tropical dry forests – Brazil (N = 16, key function = hr)

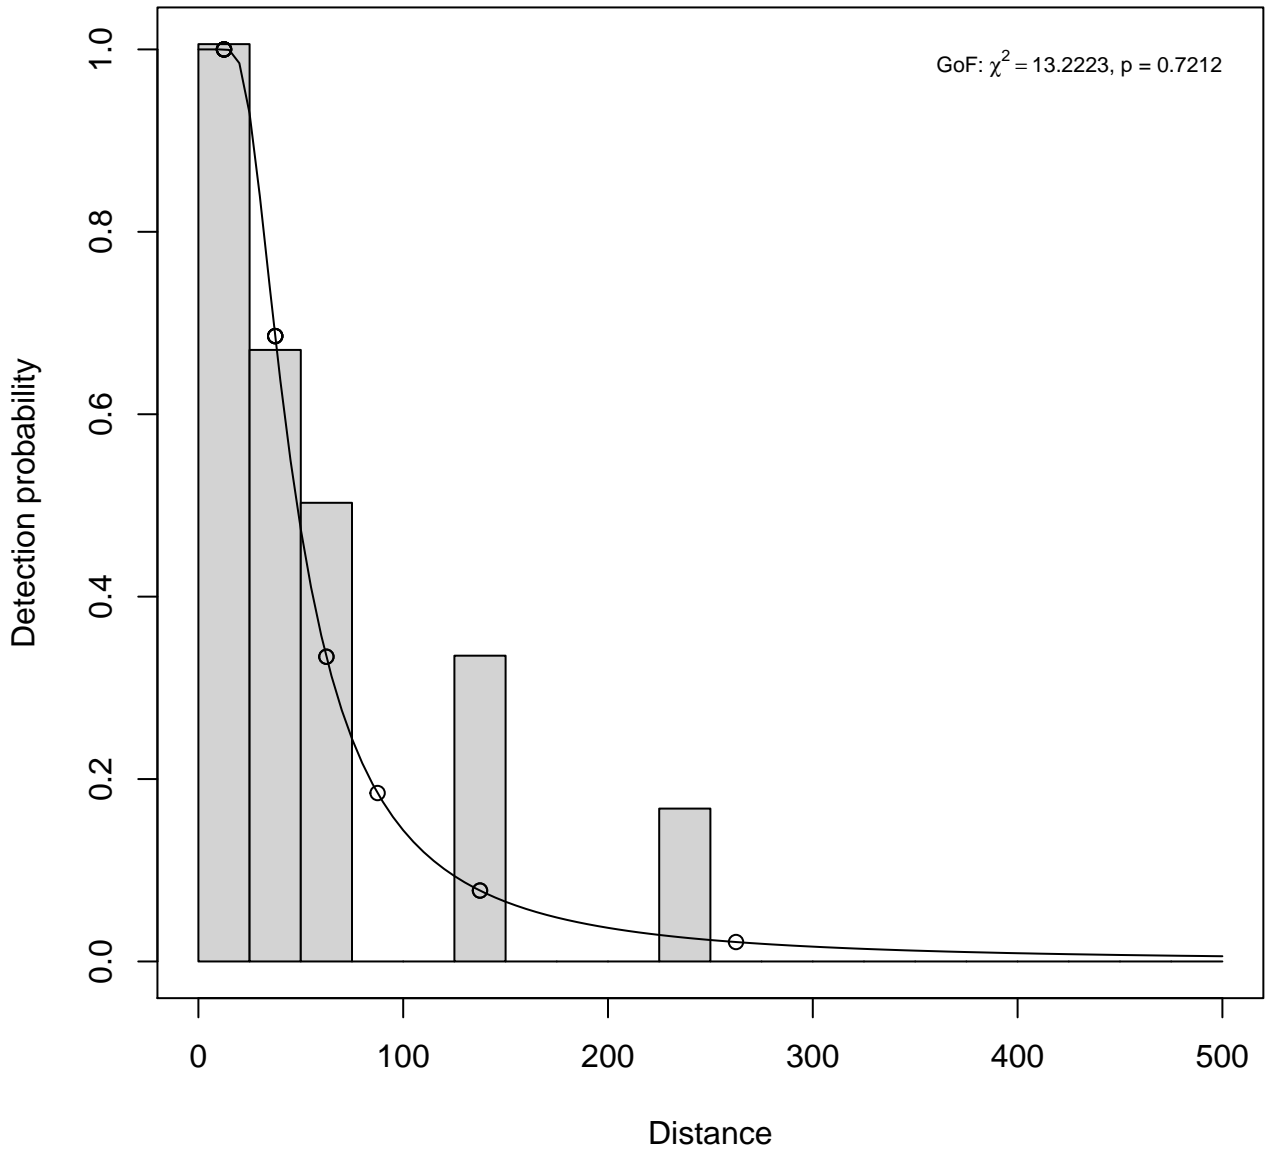

Brotogeris chiriri – Mato Grosso tropical dry forests – Brazil (N = 16, key function = hr)

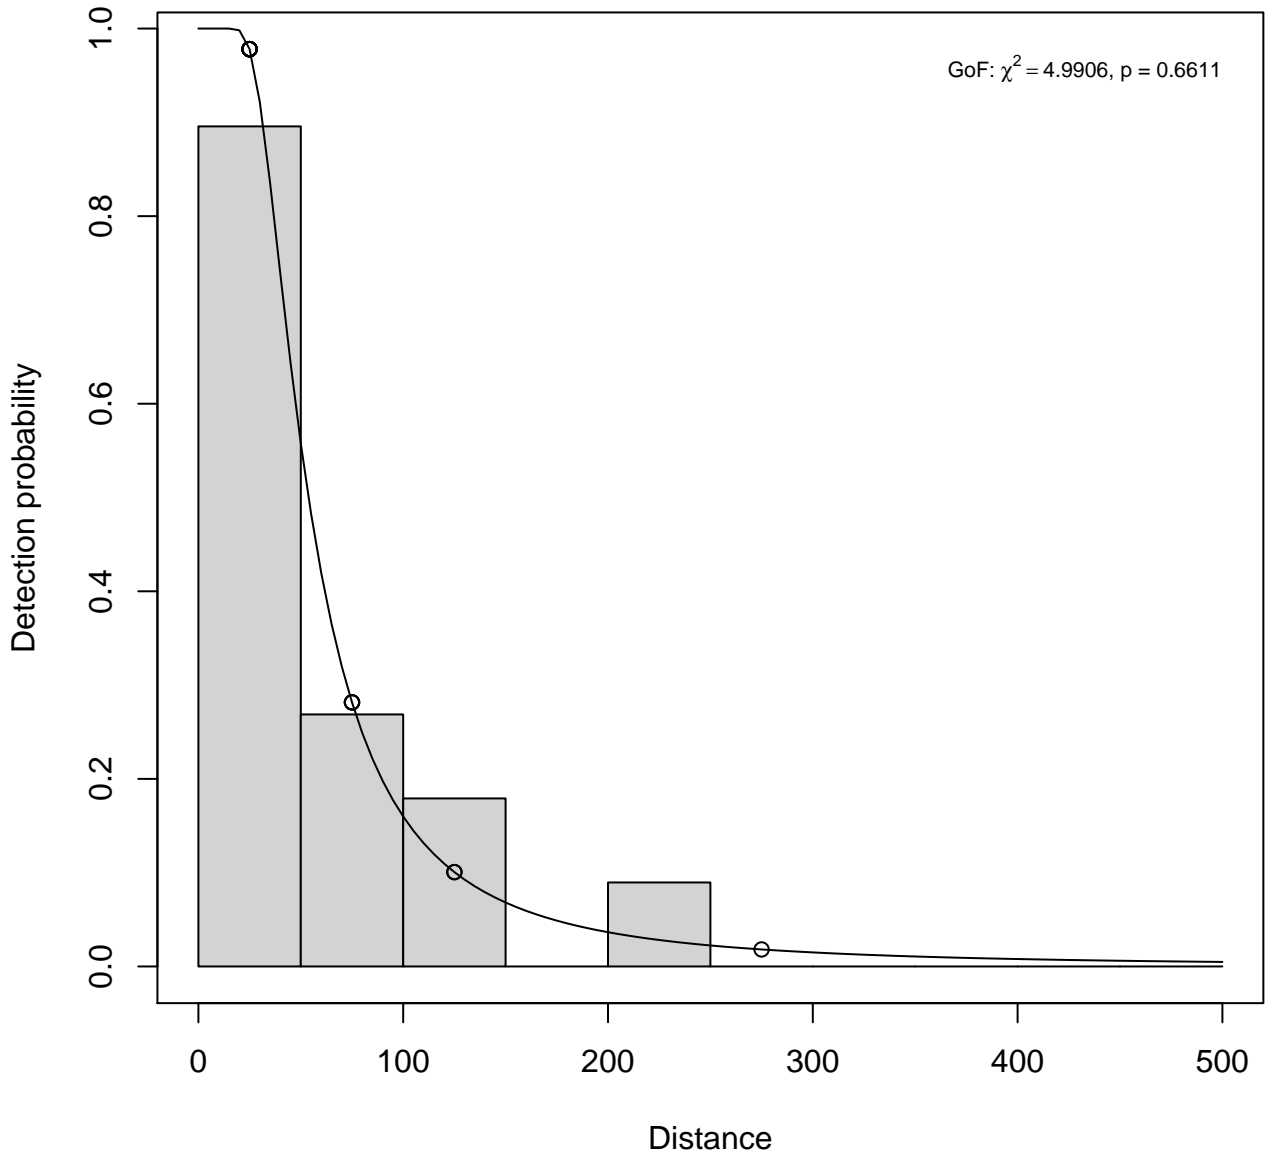

Brotogeris chiriri – Mato Grosso tropical dry forests – Brazil (N = 16, key function = hn)

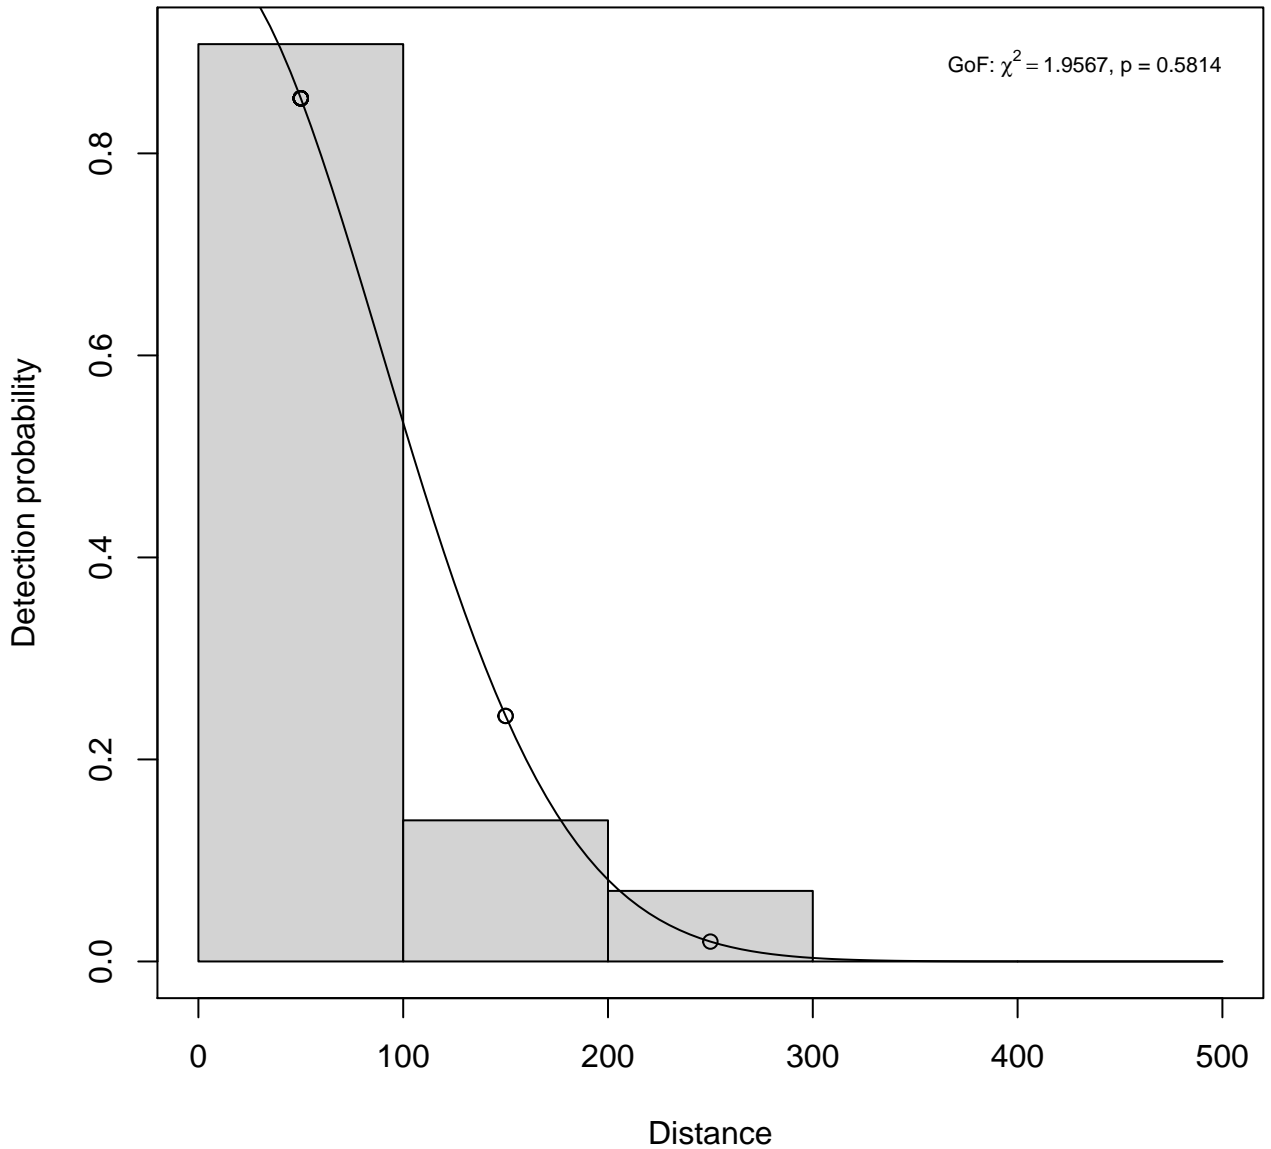

Supplement: s1 [file s1]
