# Supplementary material
Source: MDPI journal article supplement (https://www.mdpi.com/1424-2818/13/7/300)

# ***Psittacula krameri* – Upper Gangetic Plains moist deciduous forests – Ind**

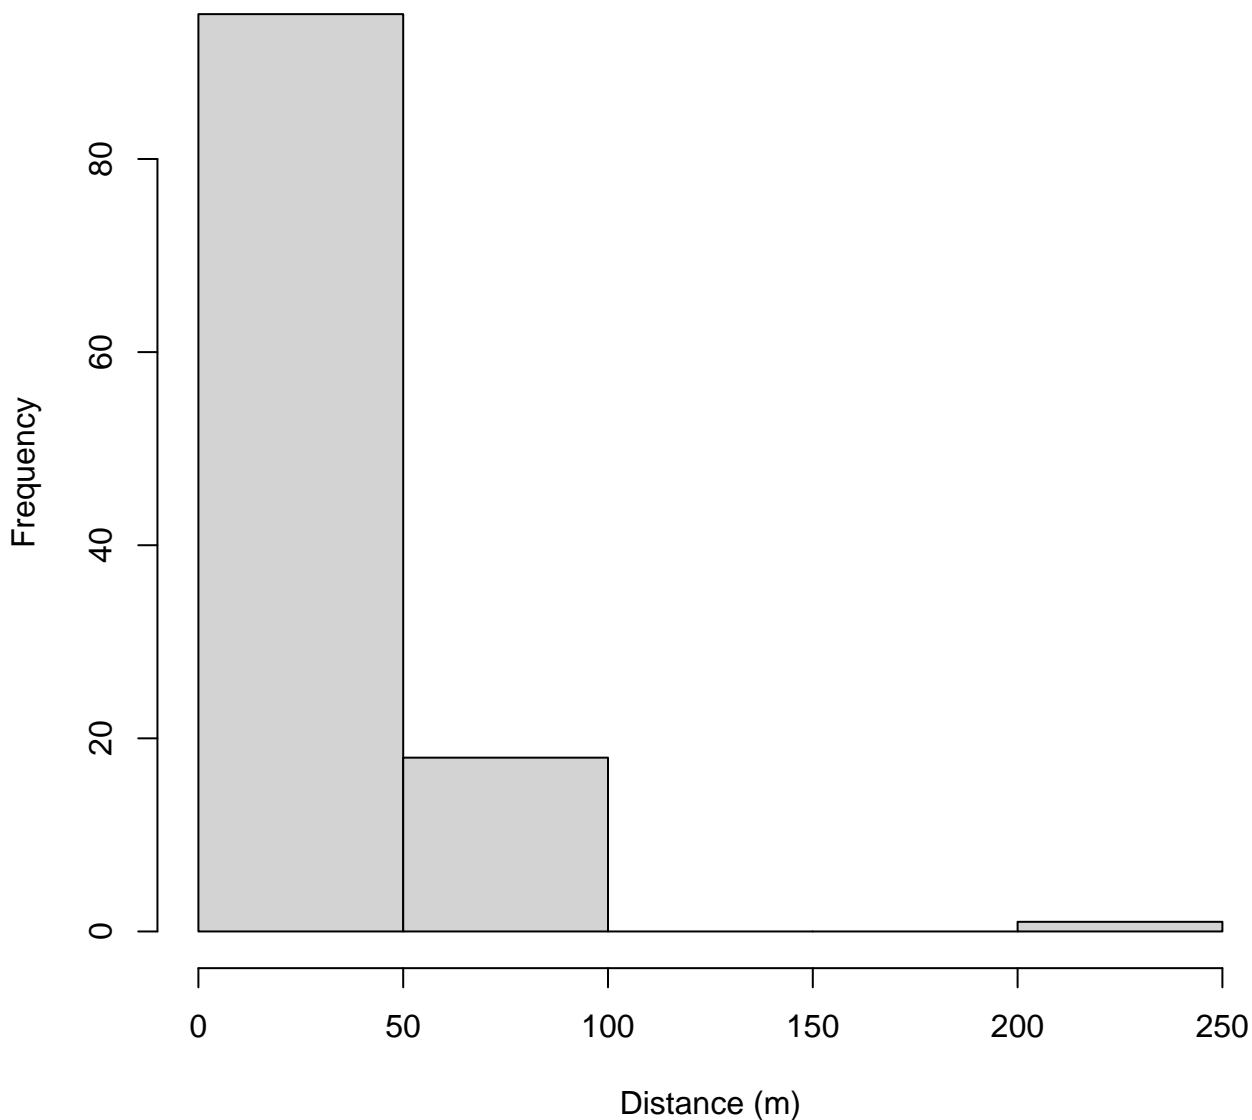

**Psittacula krameri – Upper Gangetic Plains moist deciduous forests – Ind**

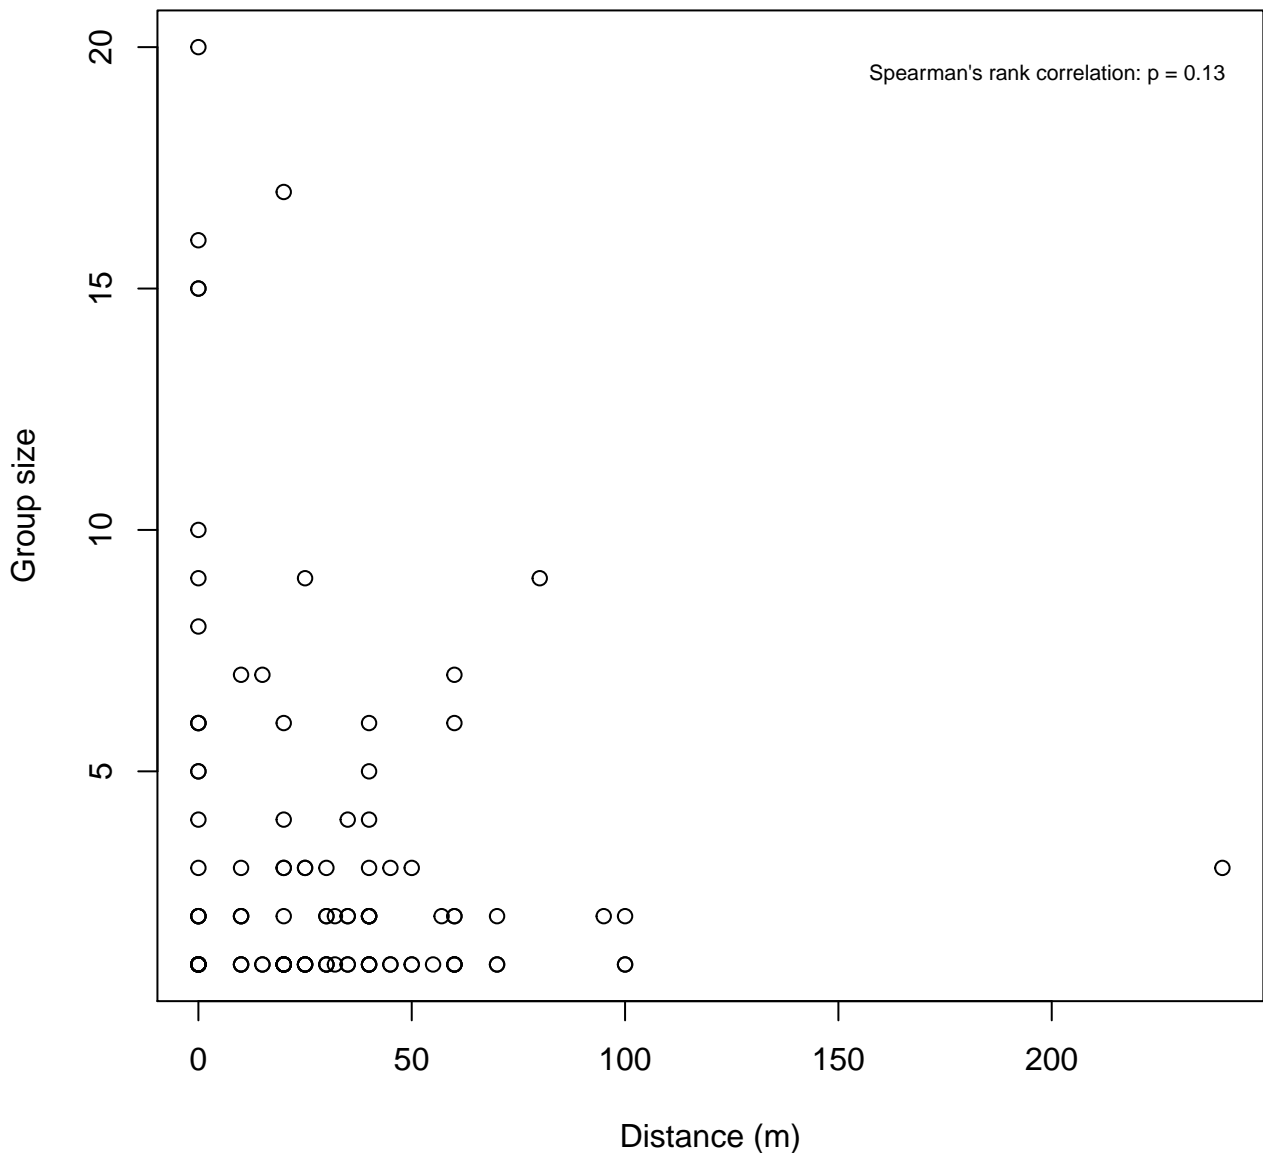

*Psittacula krameri* – Upper Gangetic Plains moist deciduous forests – India (N = 114, key function = hr)

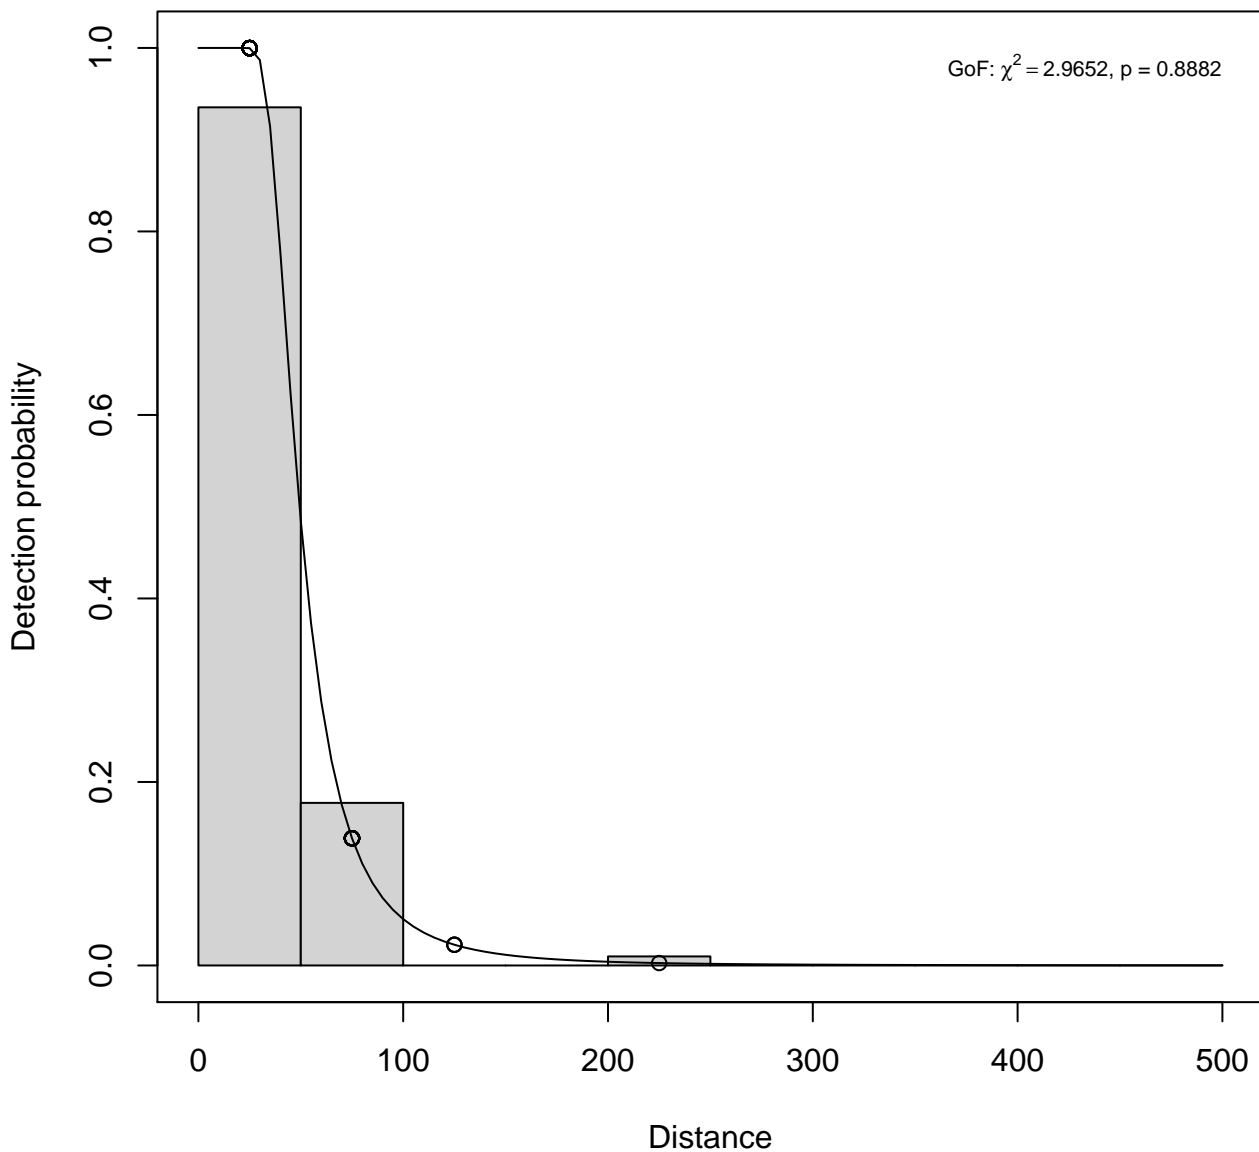

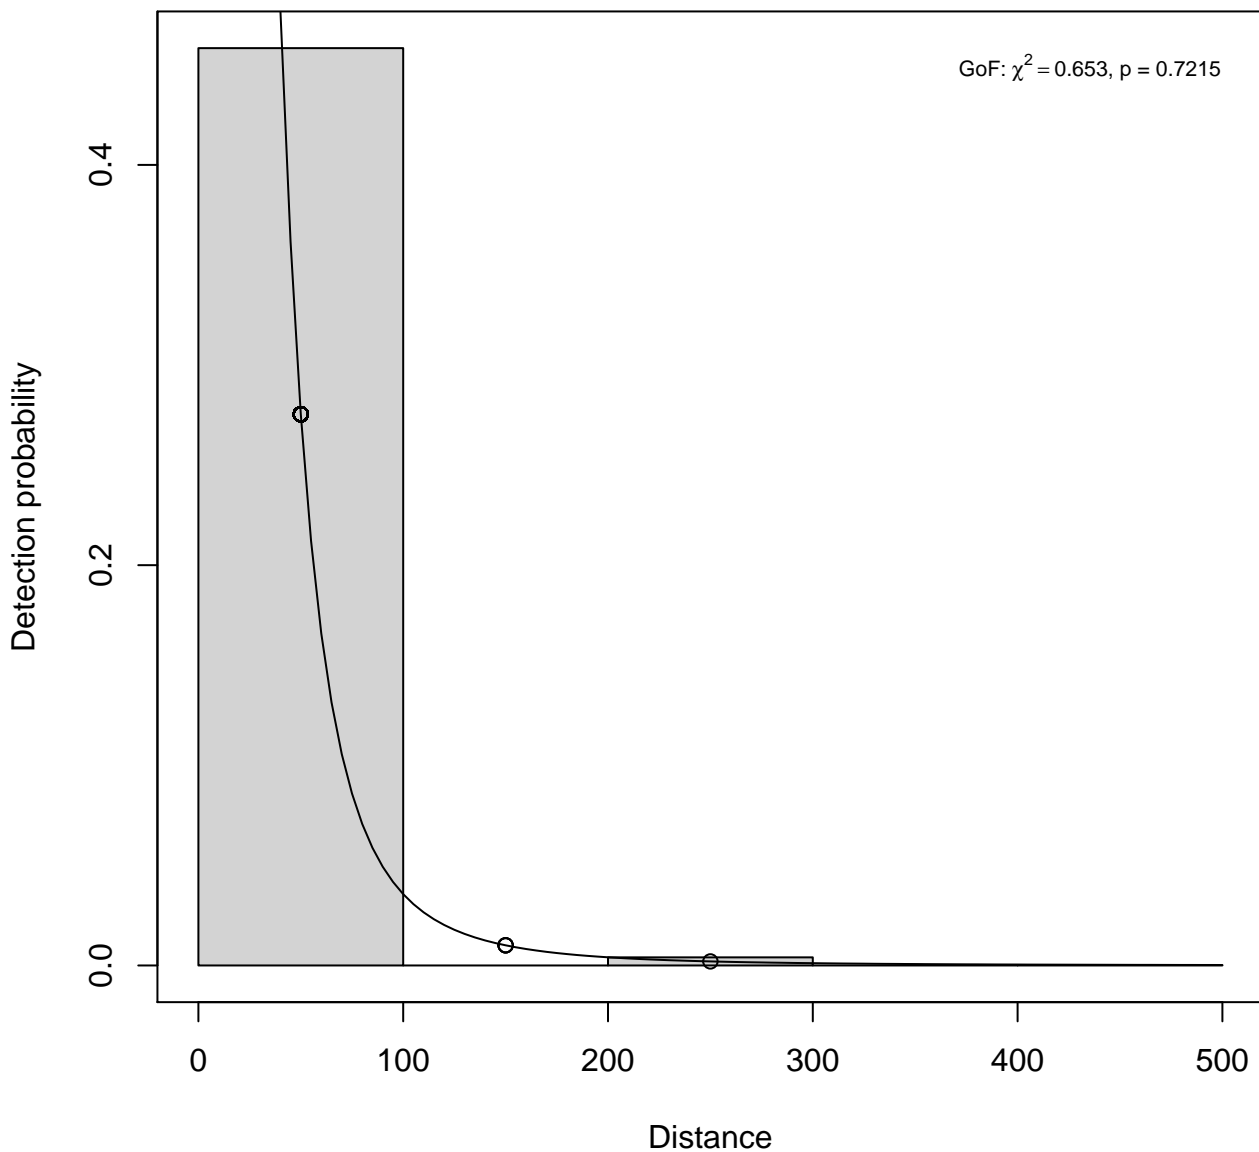

*Psittacula krameri* – Upper Gangetic Plains moist deciduous forests – India (N = 114, key function = hr)

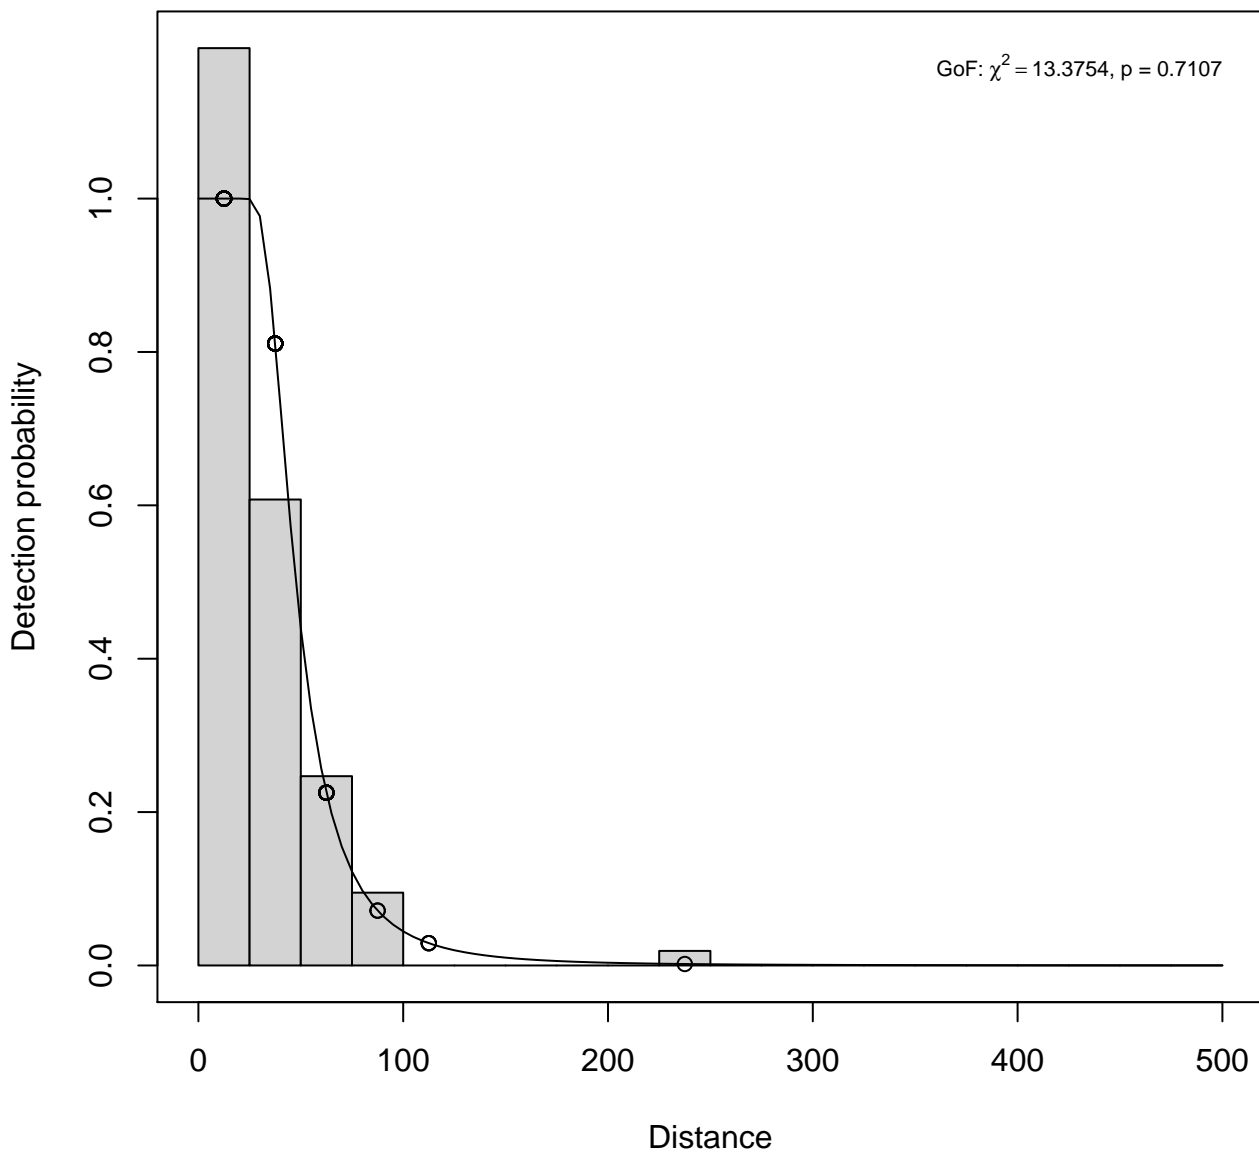

Supplement: s1 [file s1]
