# Supplementary material
Source: MDPI journal article supplement (https://www.mdpi.com/1424-2818/13/7/300)

# Aratinga weddellii – Beni savanna – Bolivia

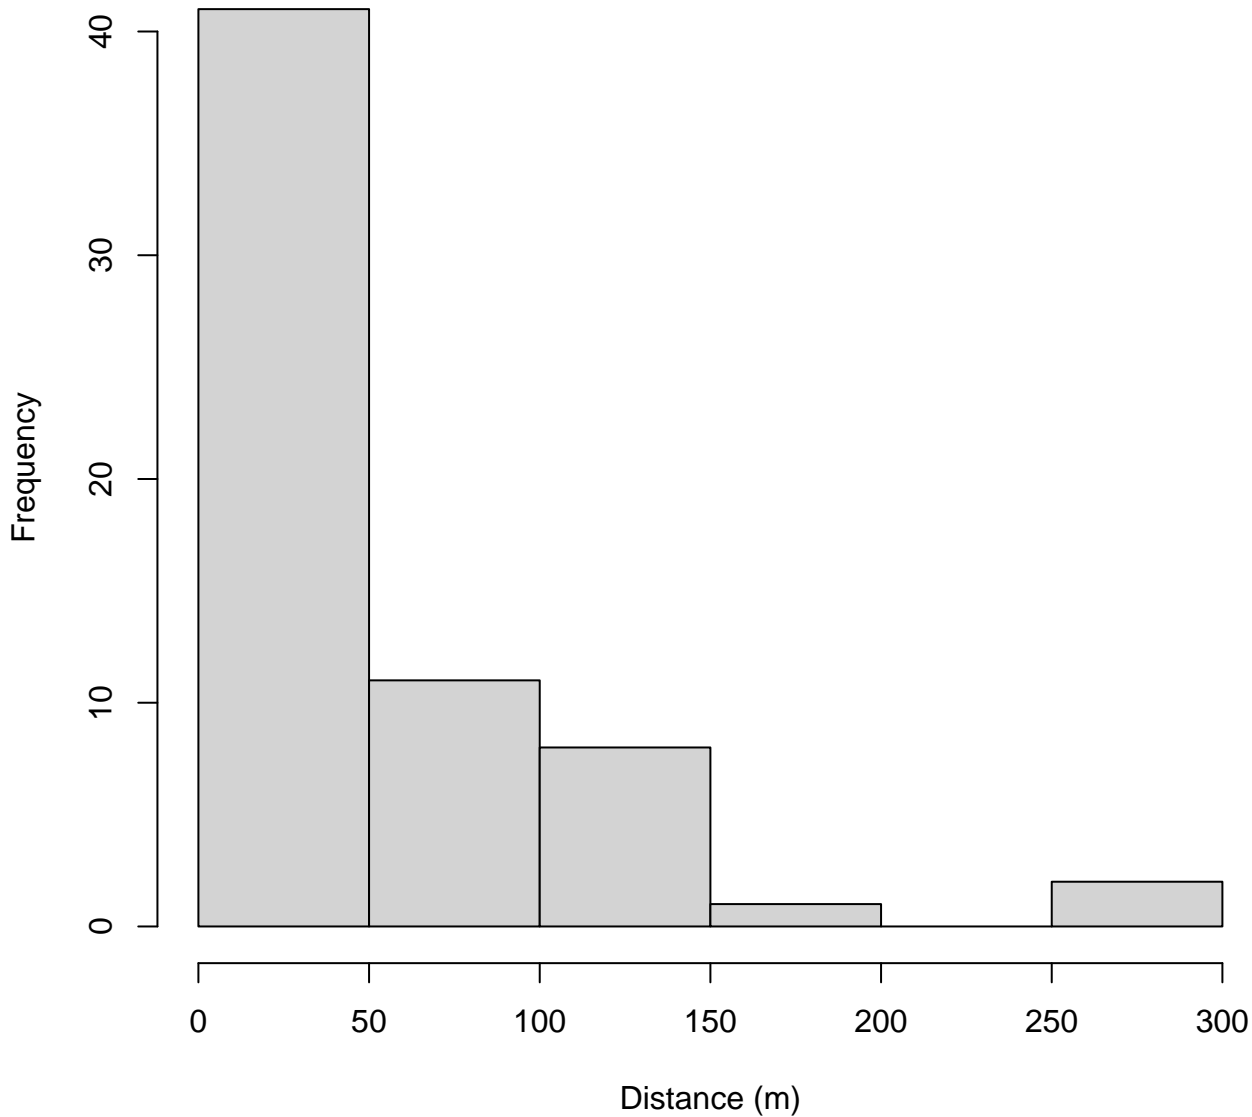

# Aratinga weddellii – Beni savanna – Bolivia

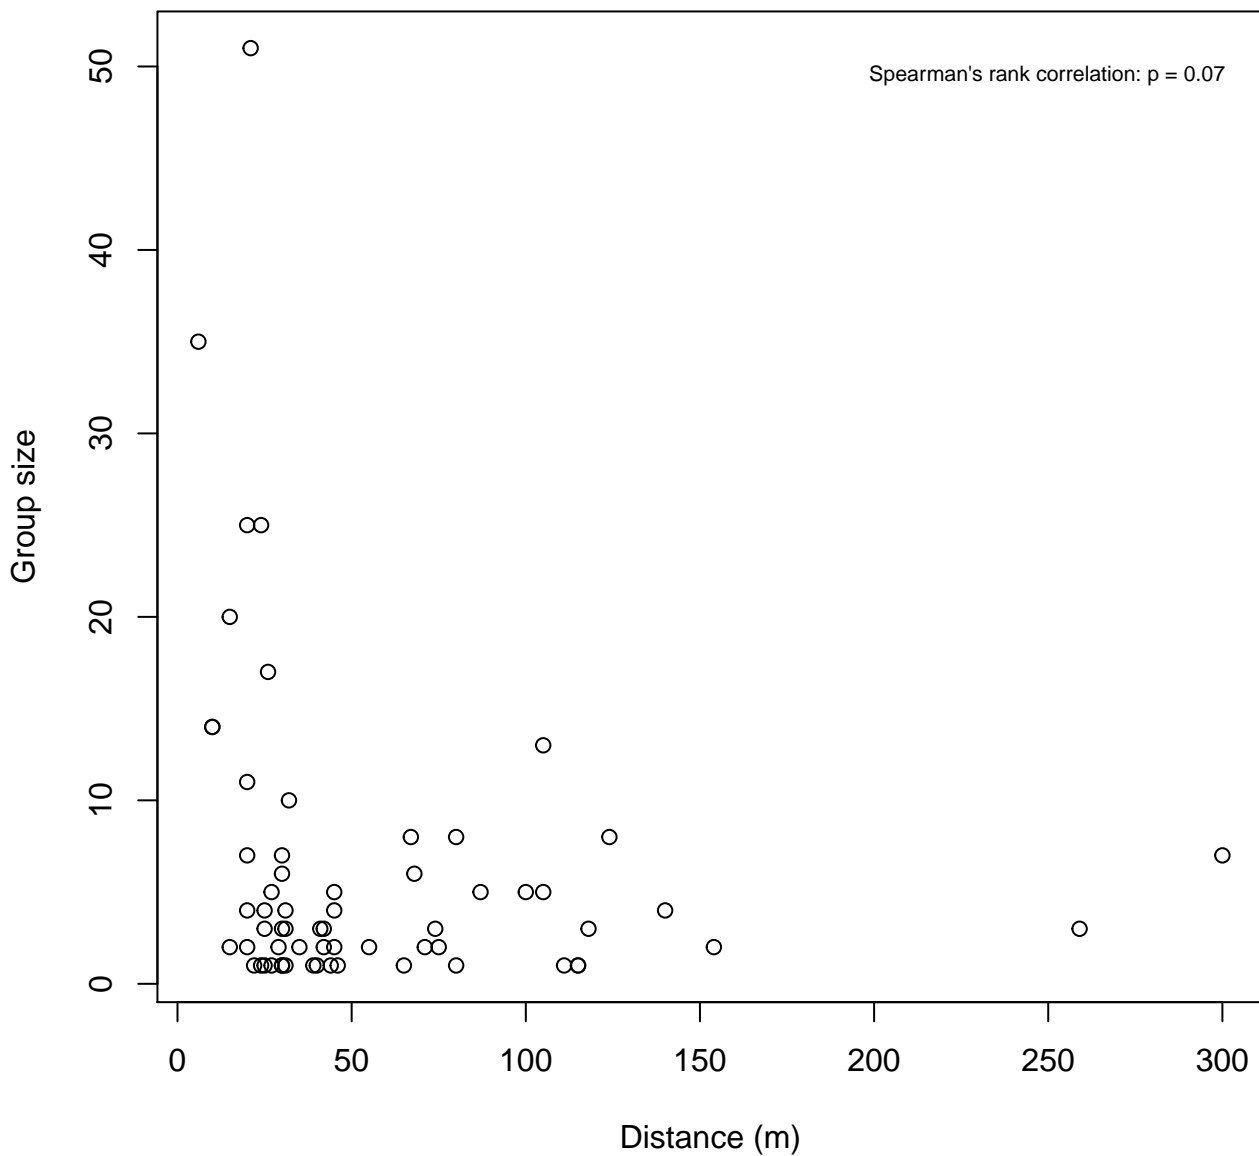

Aratinga weddellii – Beni savanna – Bolivia (N = 63, key function = hr)

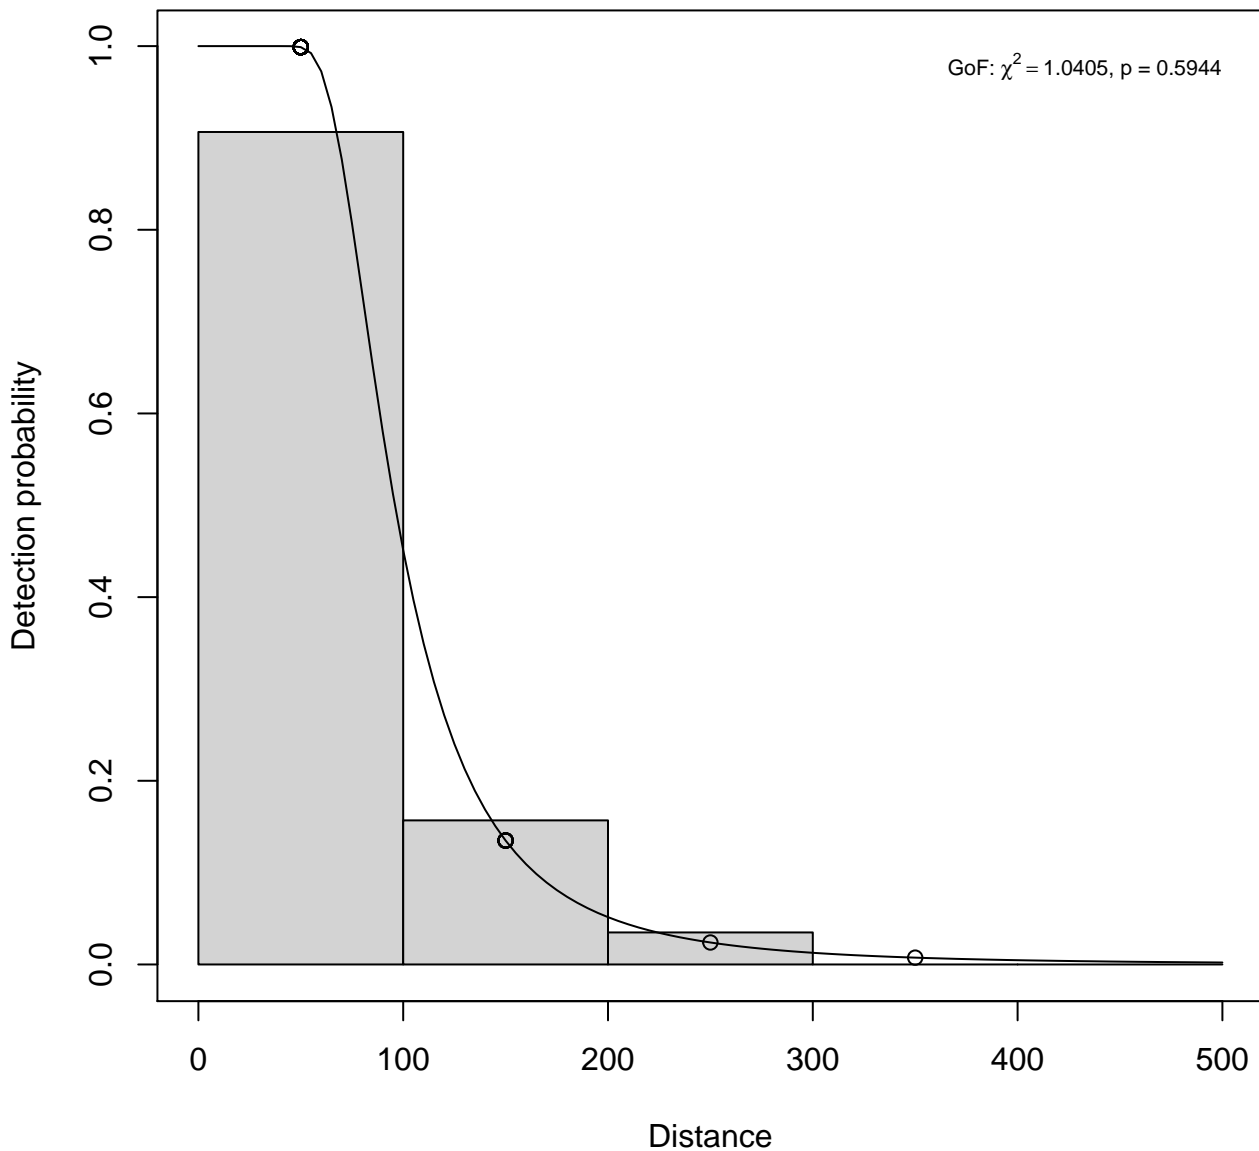

Aratinga weddellii – Beni savanna – Bolivia (N = 63, key function = hr)

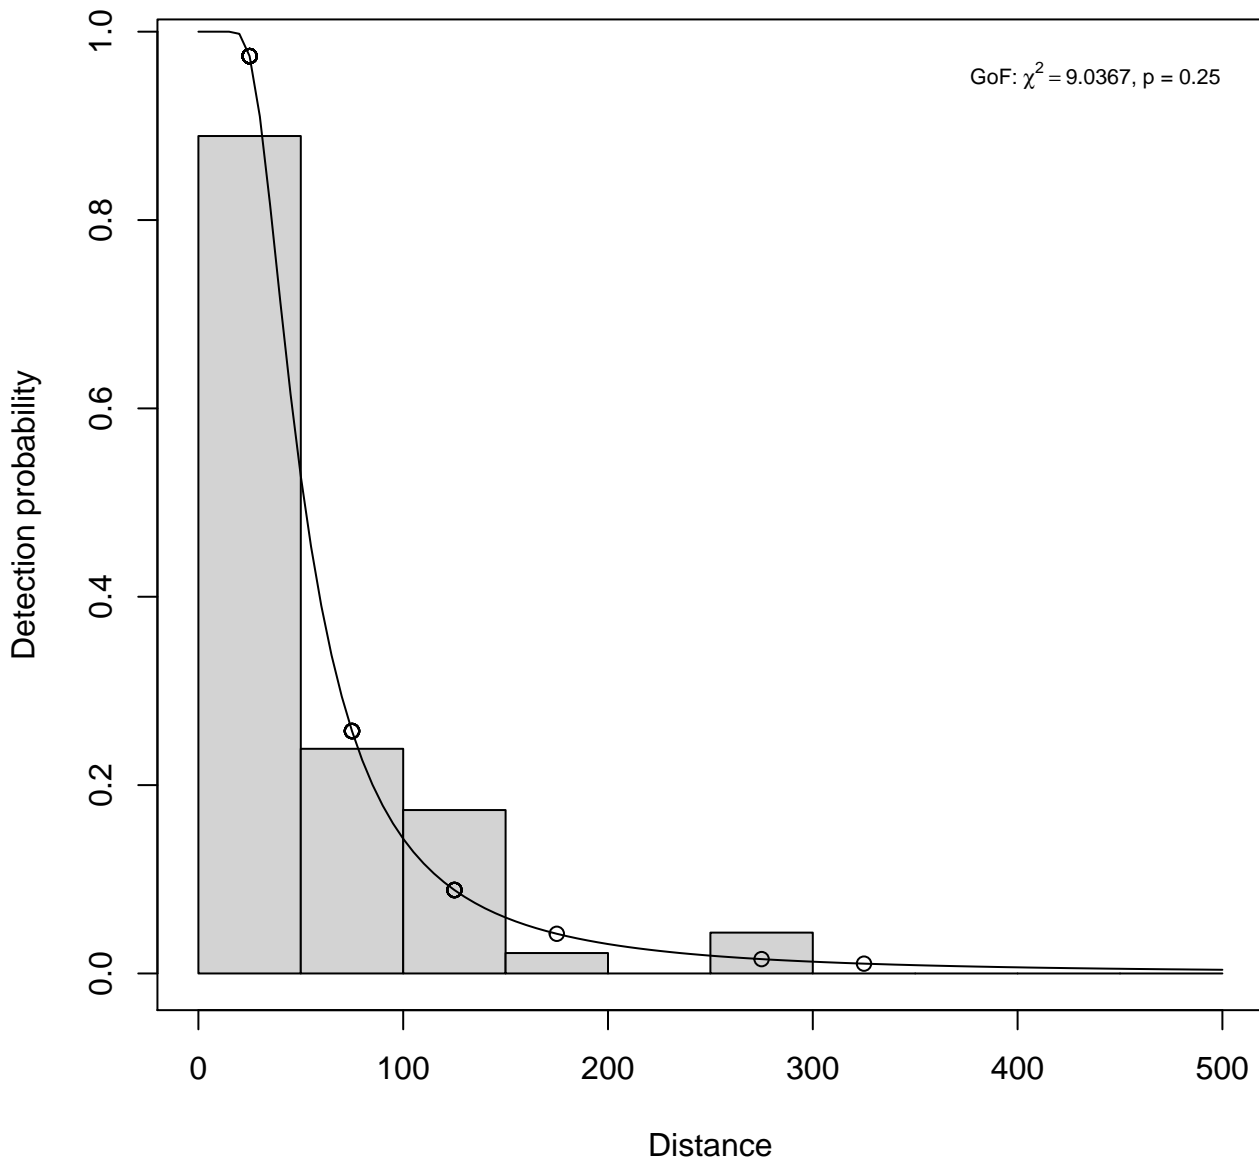

Aratinga weddellii – Beni savanna – Bolivia (N = 63, key function = hr)

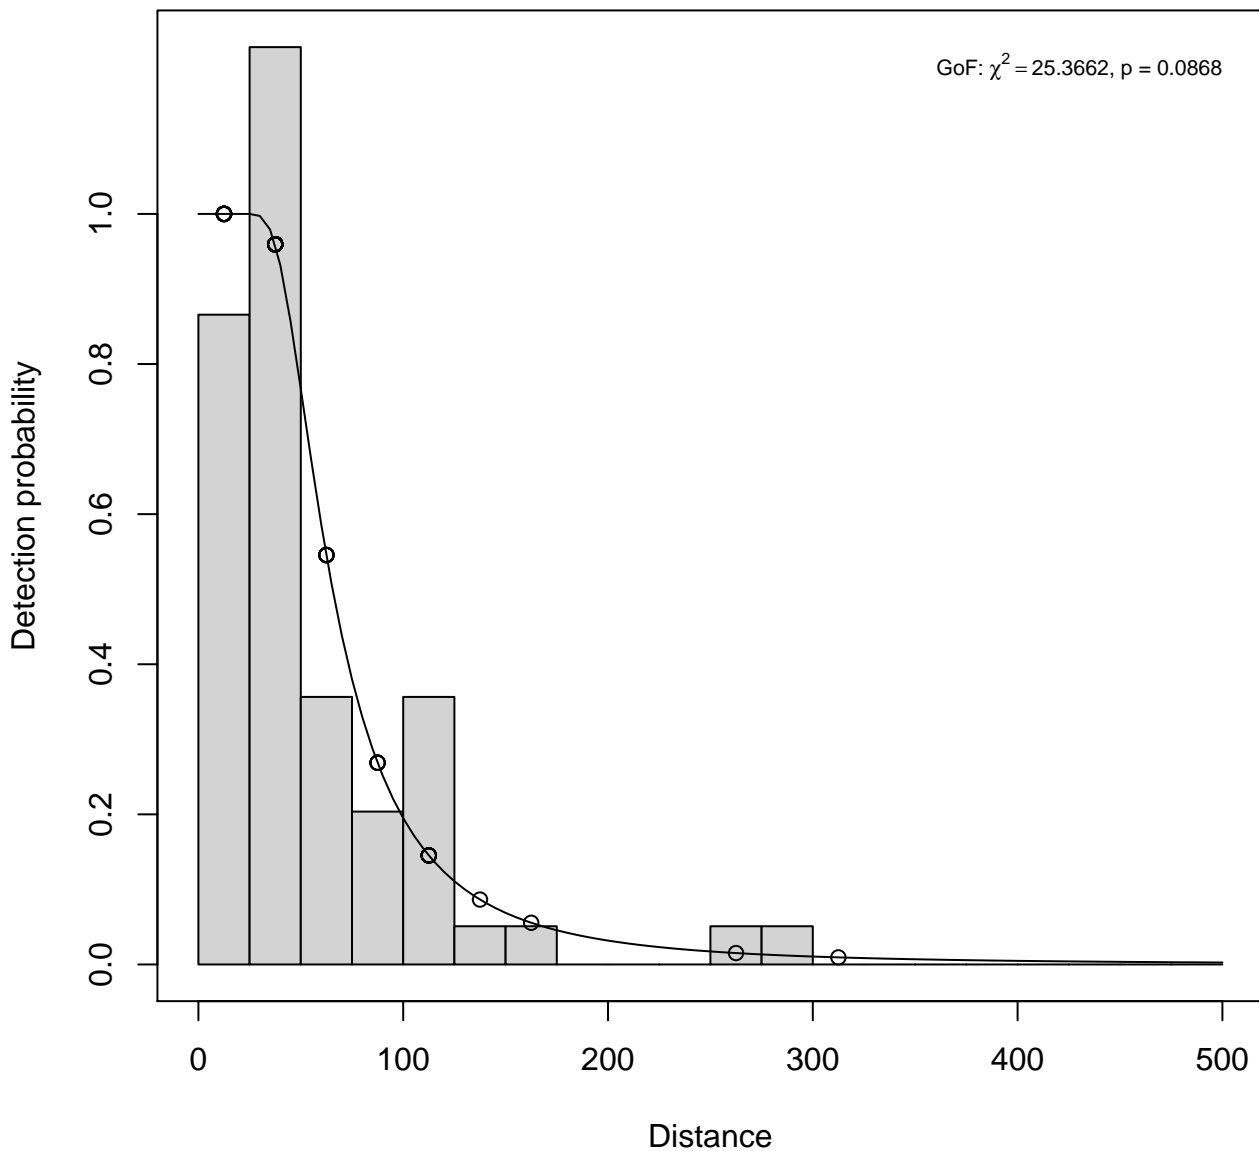

Supplement: s1 [file s1]
