# Supplementary material
Source: MDPI journal article supplement (https://www.mdpi.com/1424-2818/13/7/300)

# Amazona aestiva – Cerrado – Brazil

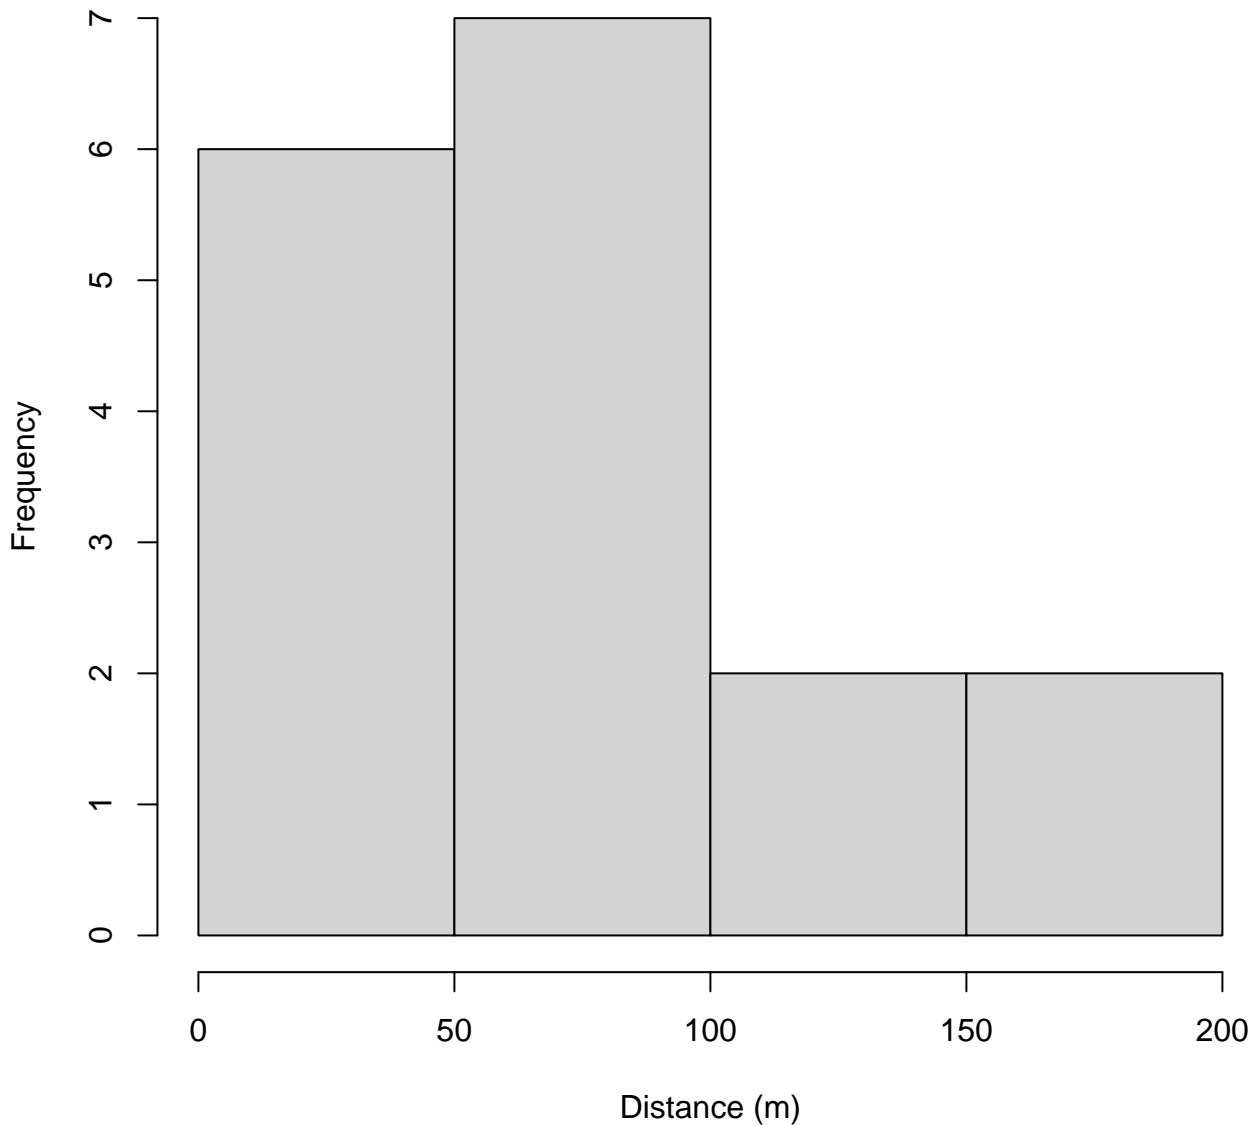

# Amazona aestiva – Cerrado – Brazil

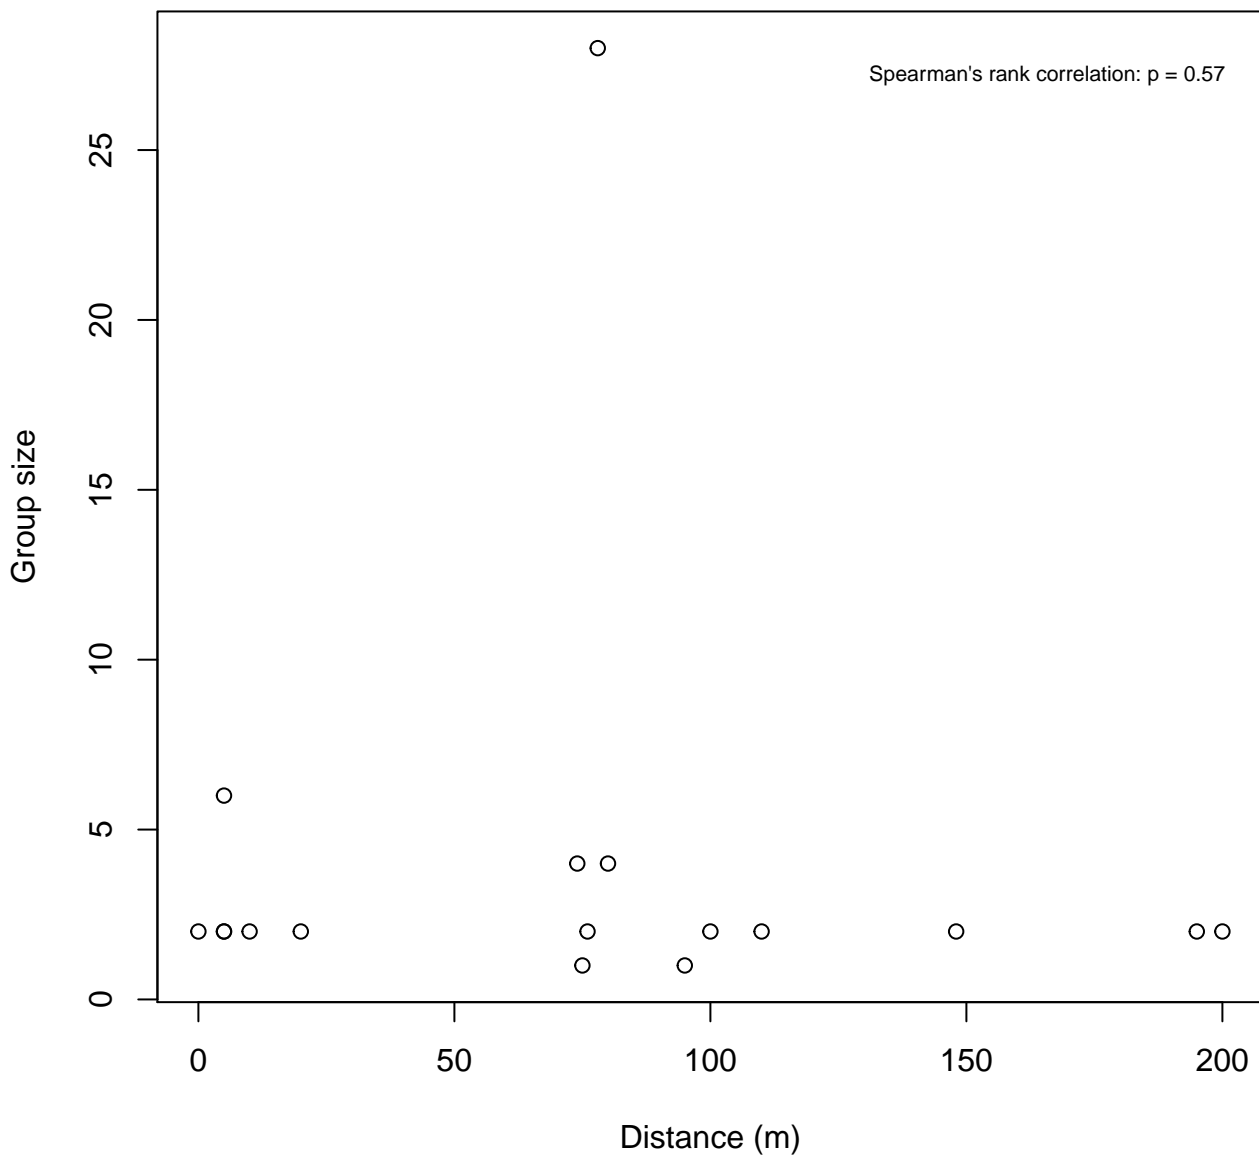

Amazona aestiva – Cerrado – Brazil (N = 17, key function = hn)

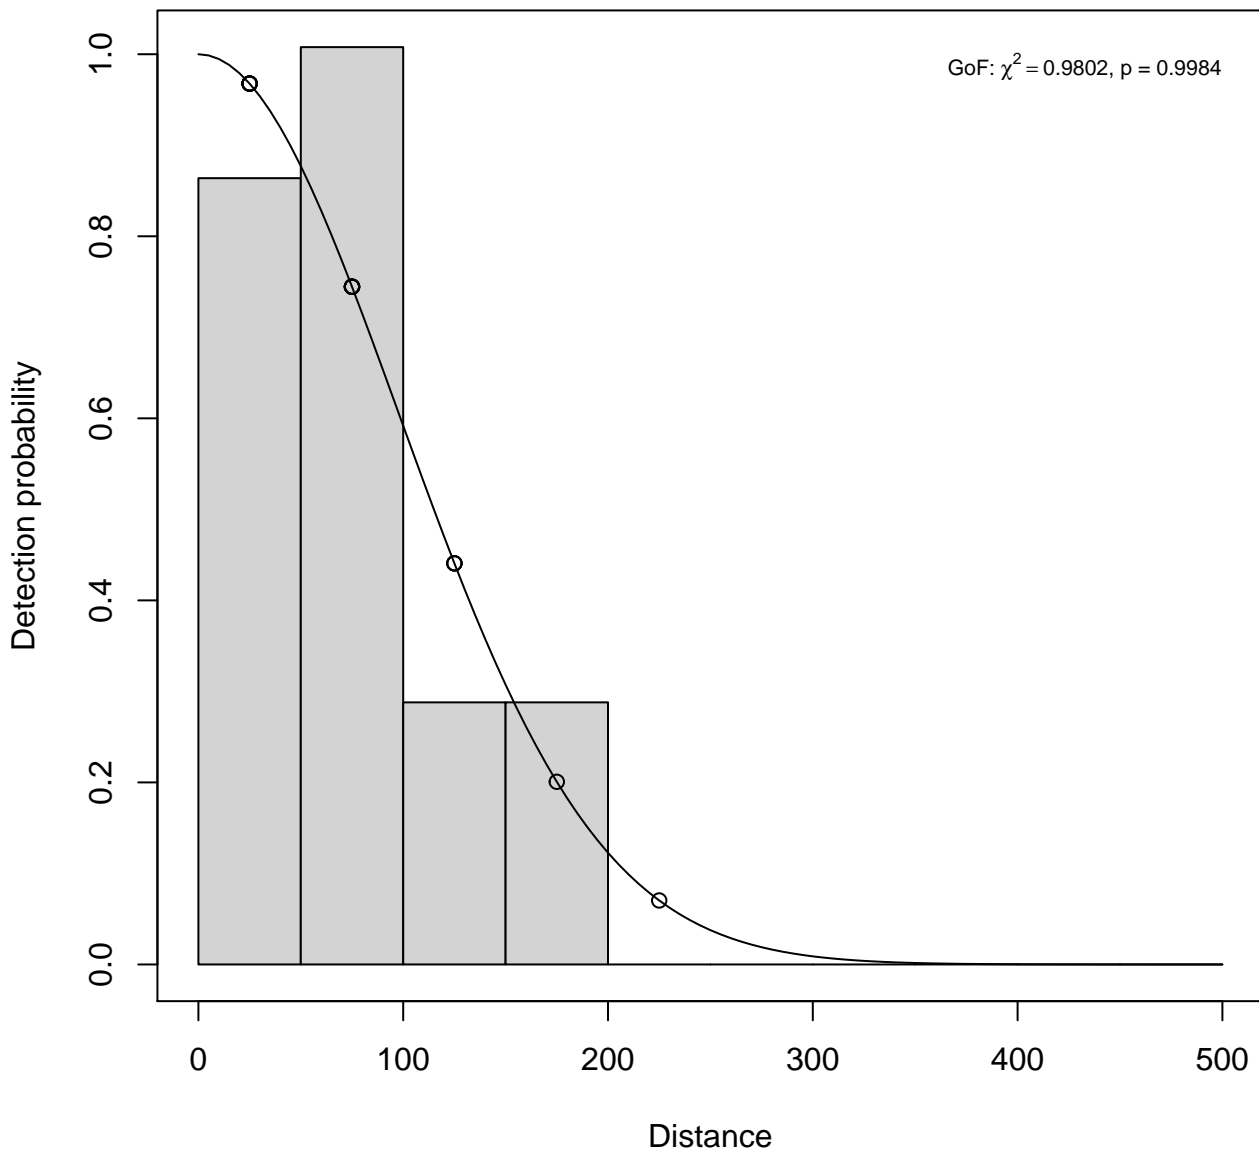

*Amazona aestiva* – Cerrado – Brazil (N = 17, key function = hn)

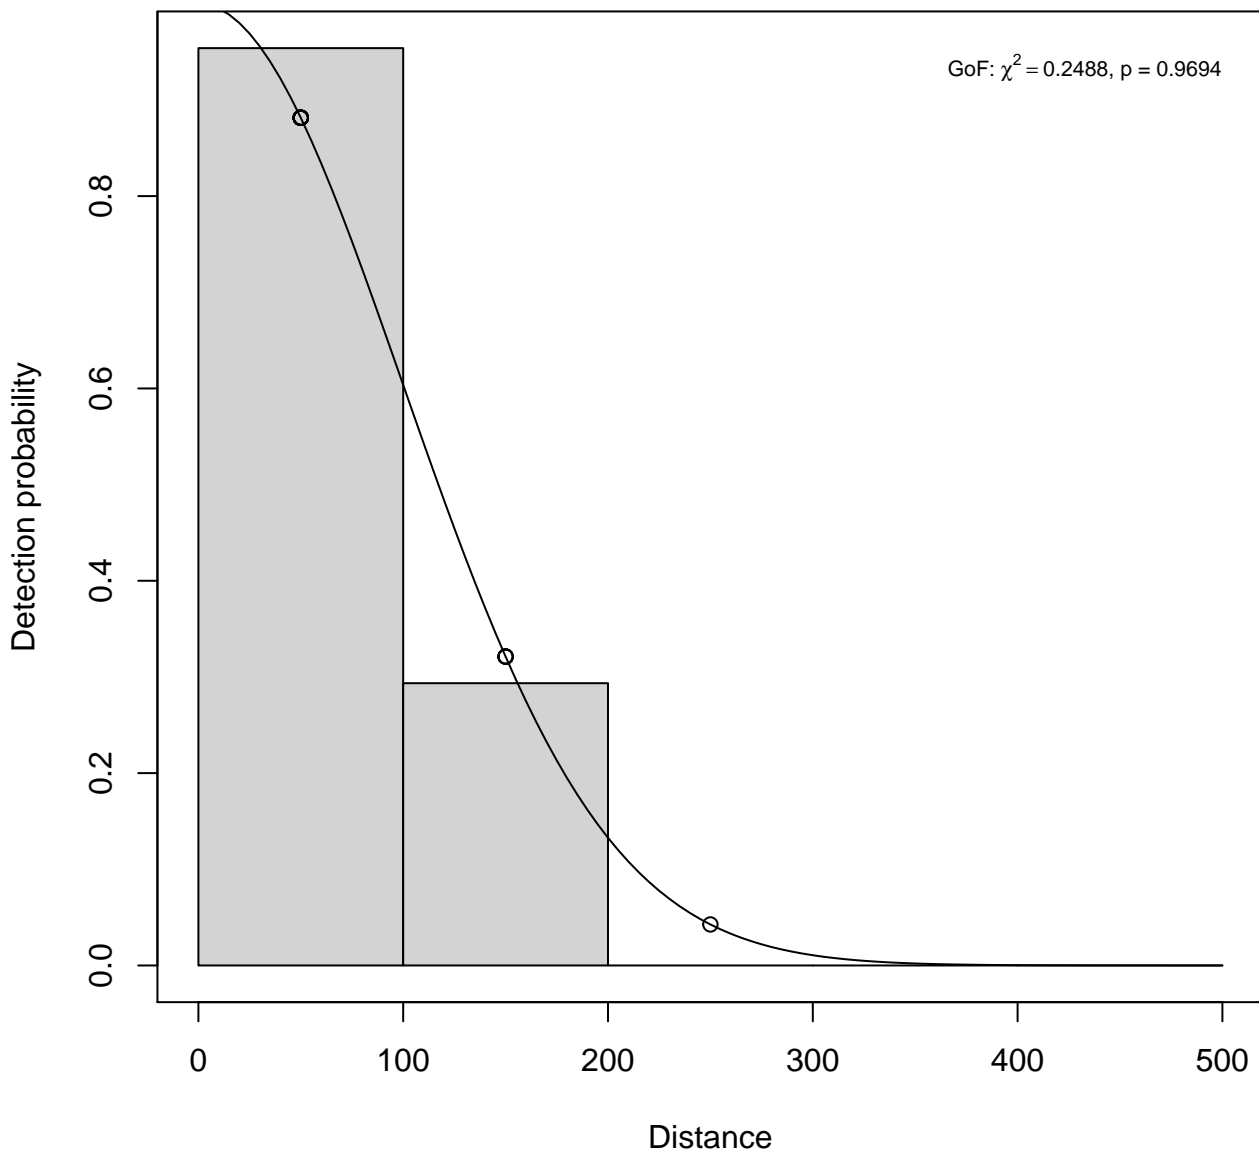

Amazona aestiva – Cerrado – Brazil (N = 17, key function = hn)

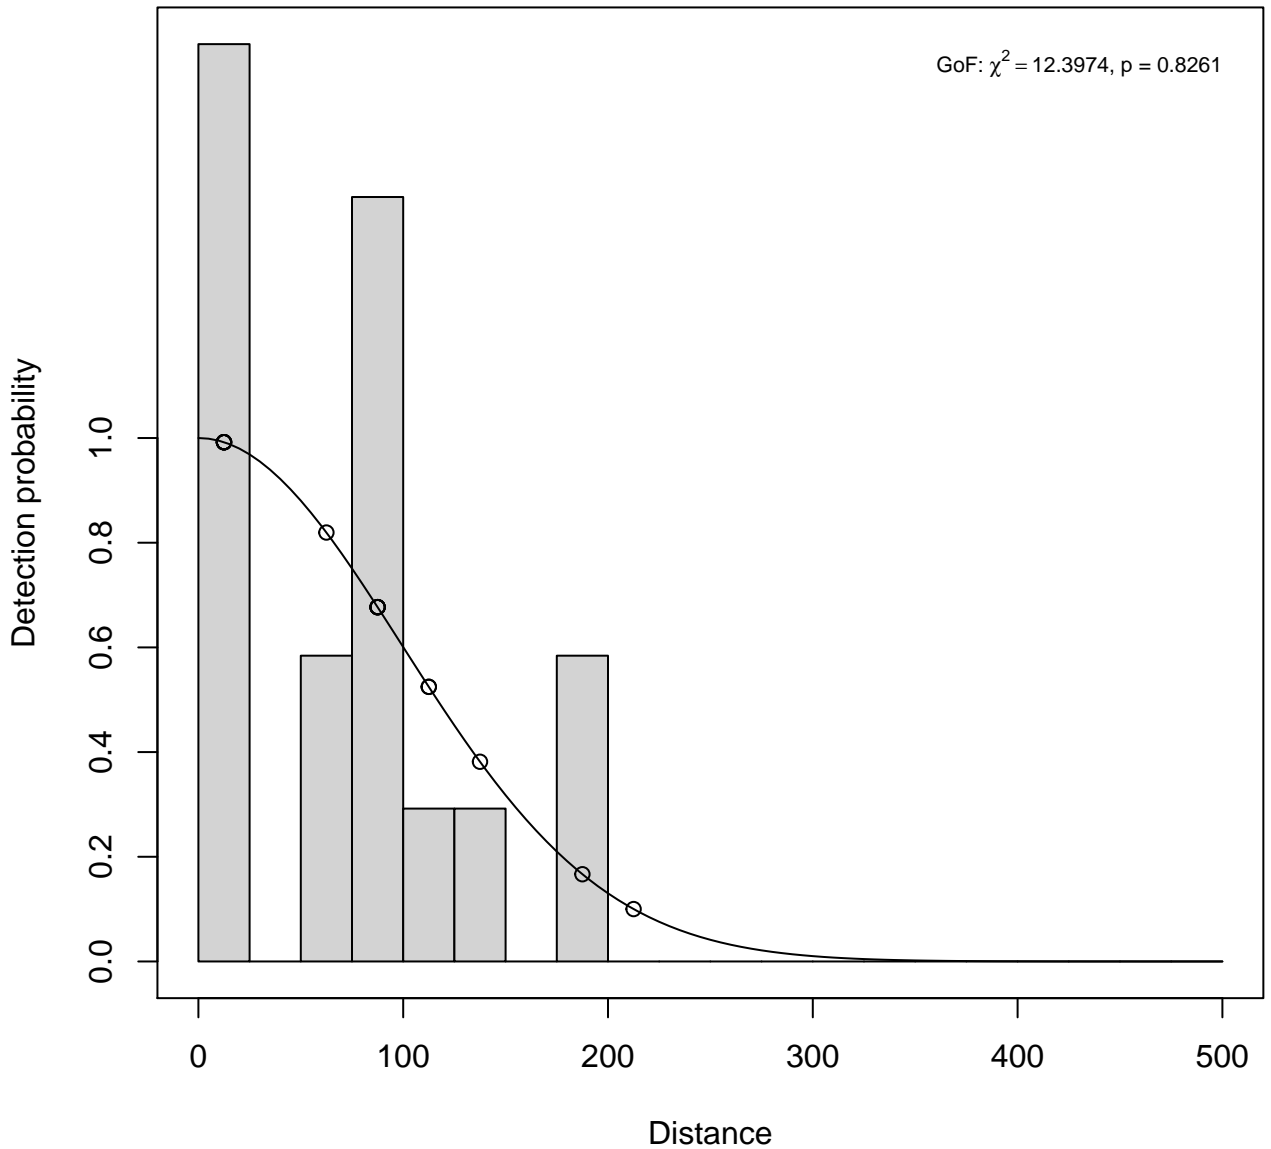

Supplement: s1 [file s1]
