# Supplementary material
Source: MDPI journal article supplement (https://www.mdpi.com/1424-2818/13/7/300)

# **Eolophus roseicapilla – Einasleigh upland savanna – Australia**

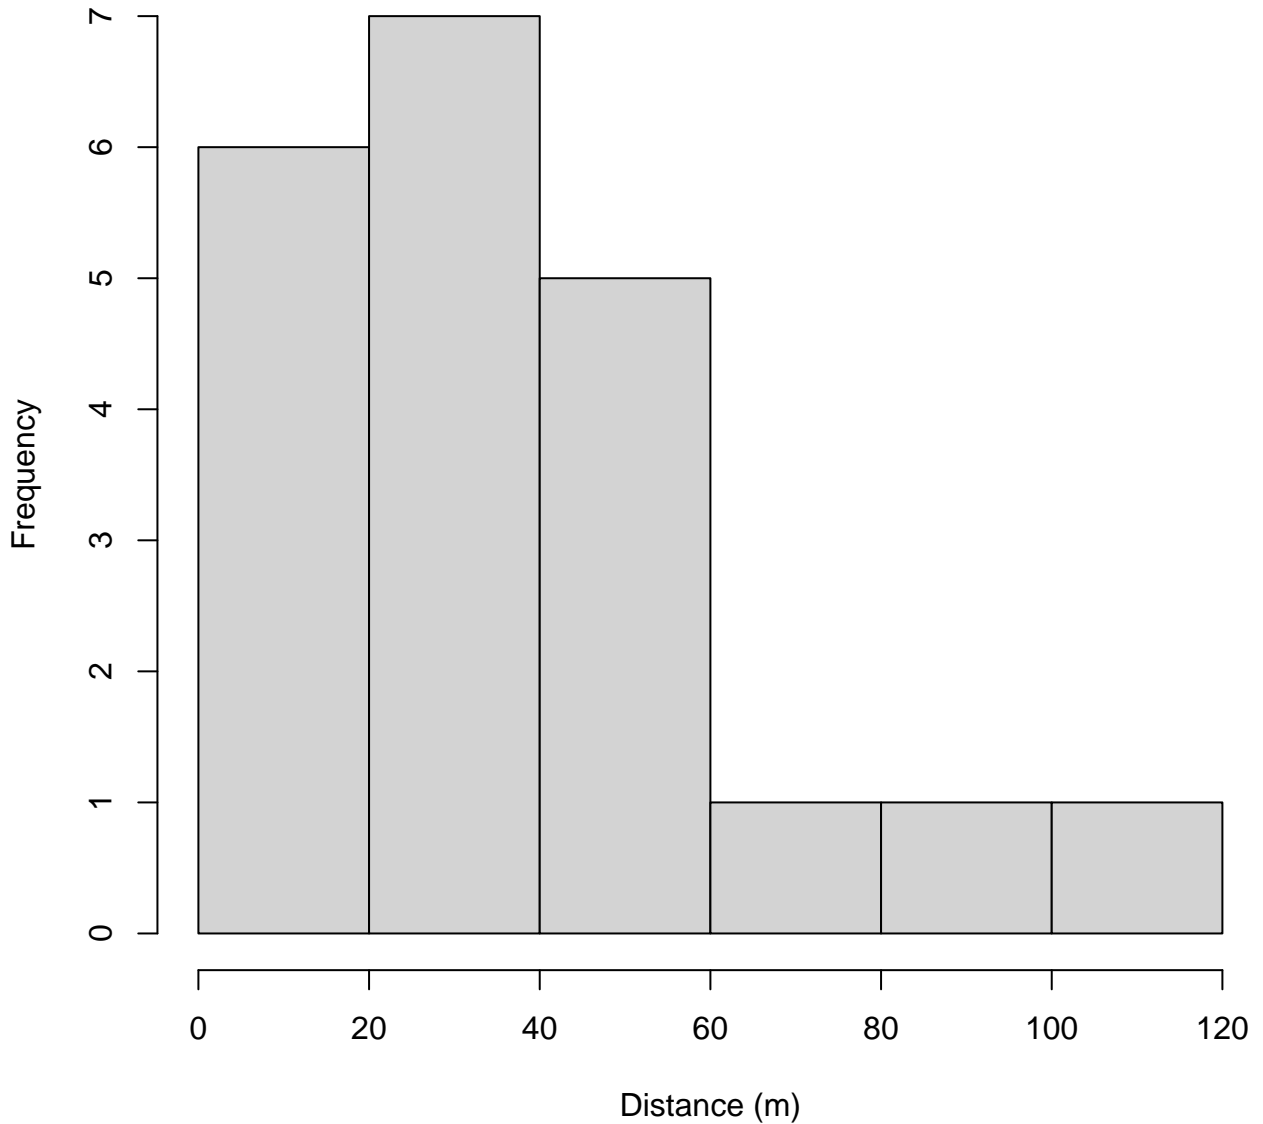

# ***Eolophus roseicapilla* – Einasleigh upland savanna – Australia**

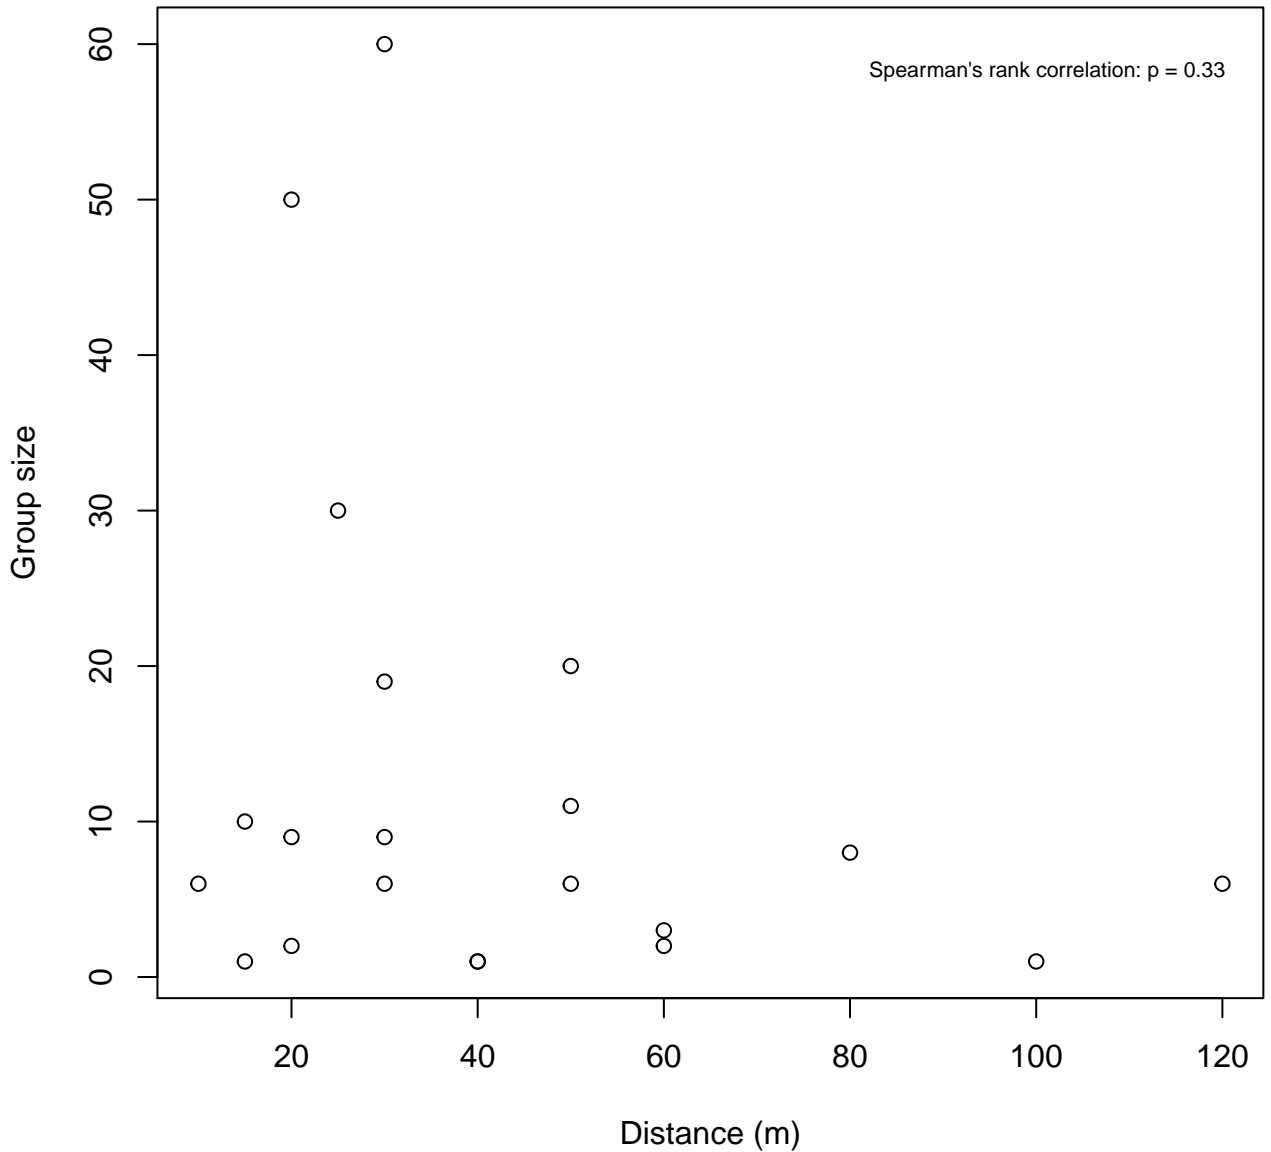

*Eolophus roseicapilla* – Einasleigh upland savanna – Australia (N = 21, key function = hn)

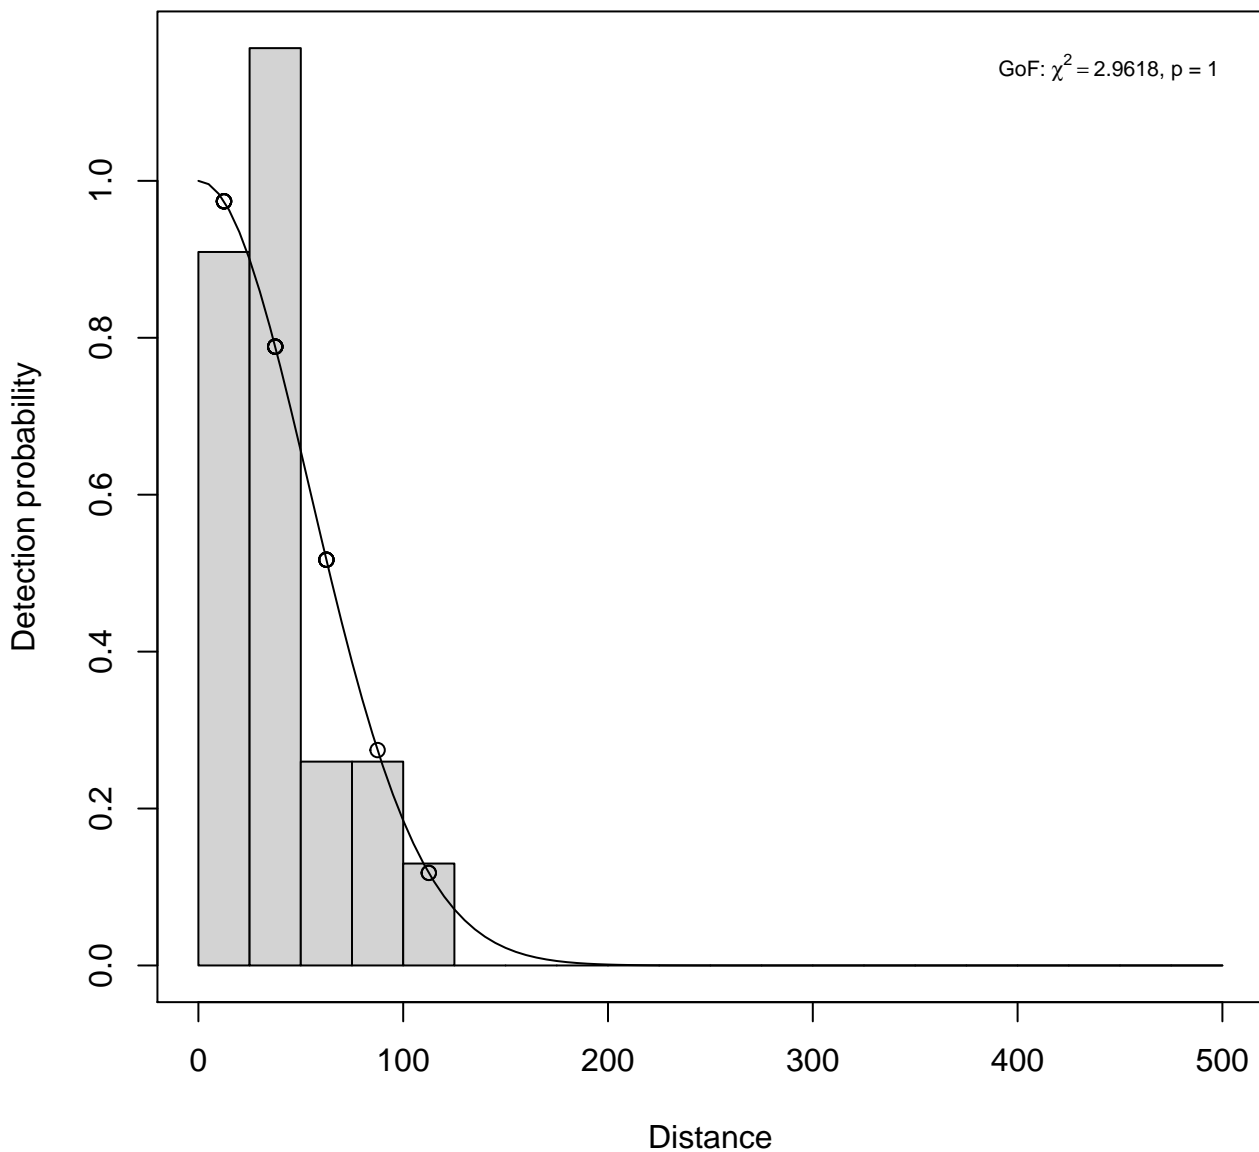

Eolophus roseicapilla – Einasleigh upland savanna – Australia (N = 21, key function = hn)

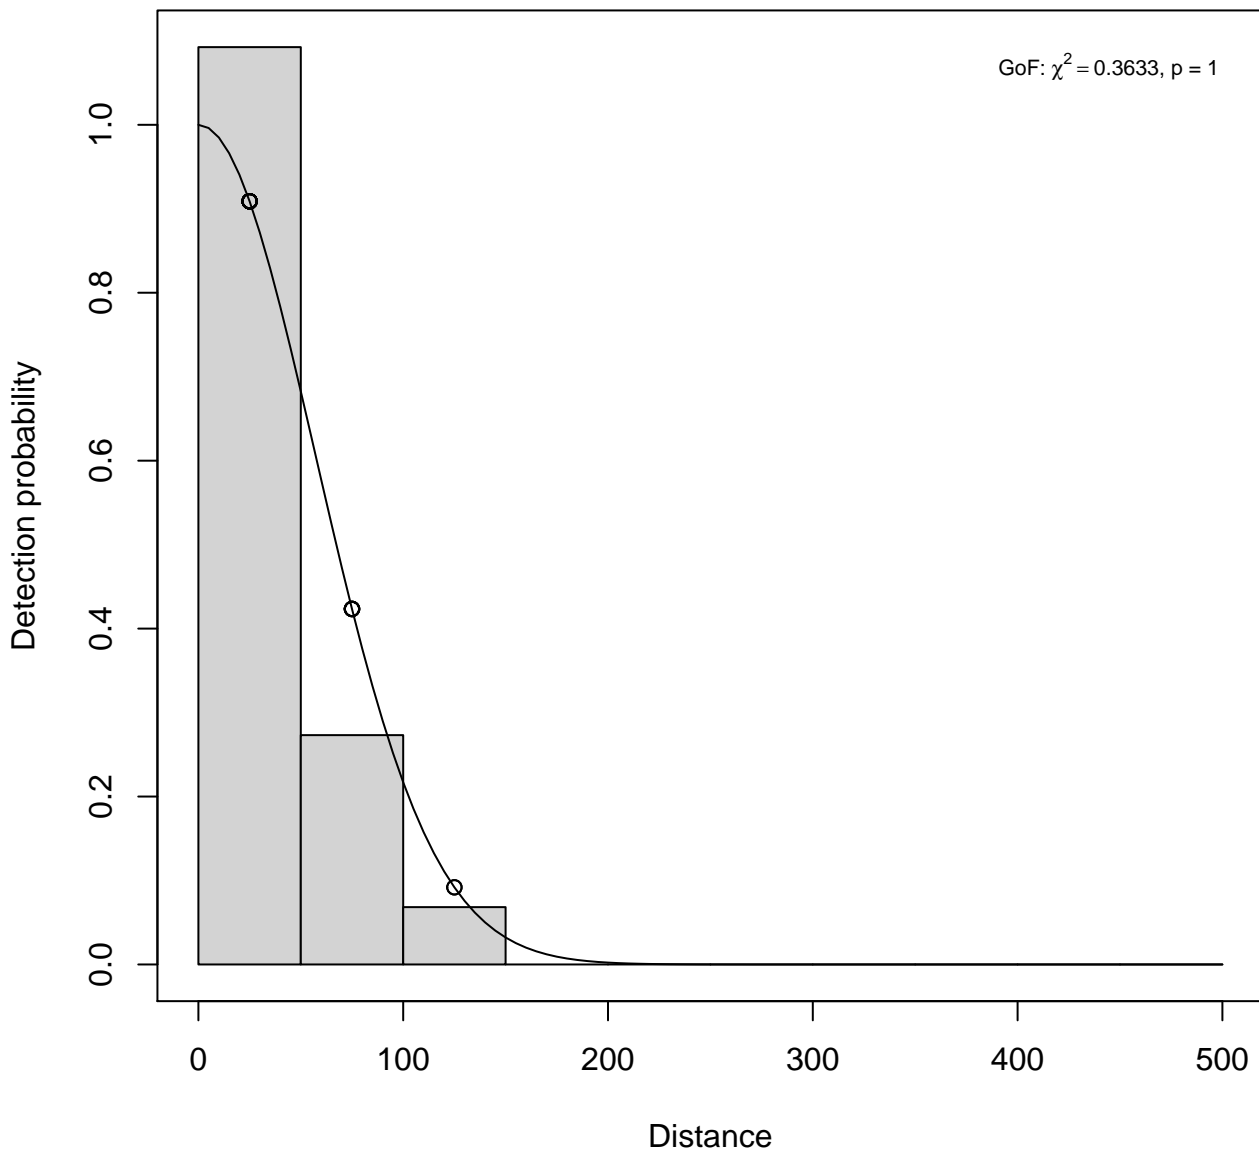

Eolophus roseicapilla – Einasleigh upland savanna – Australia (N = 21, key function = hn)

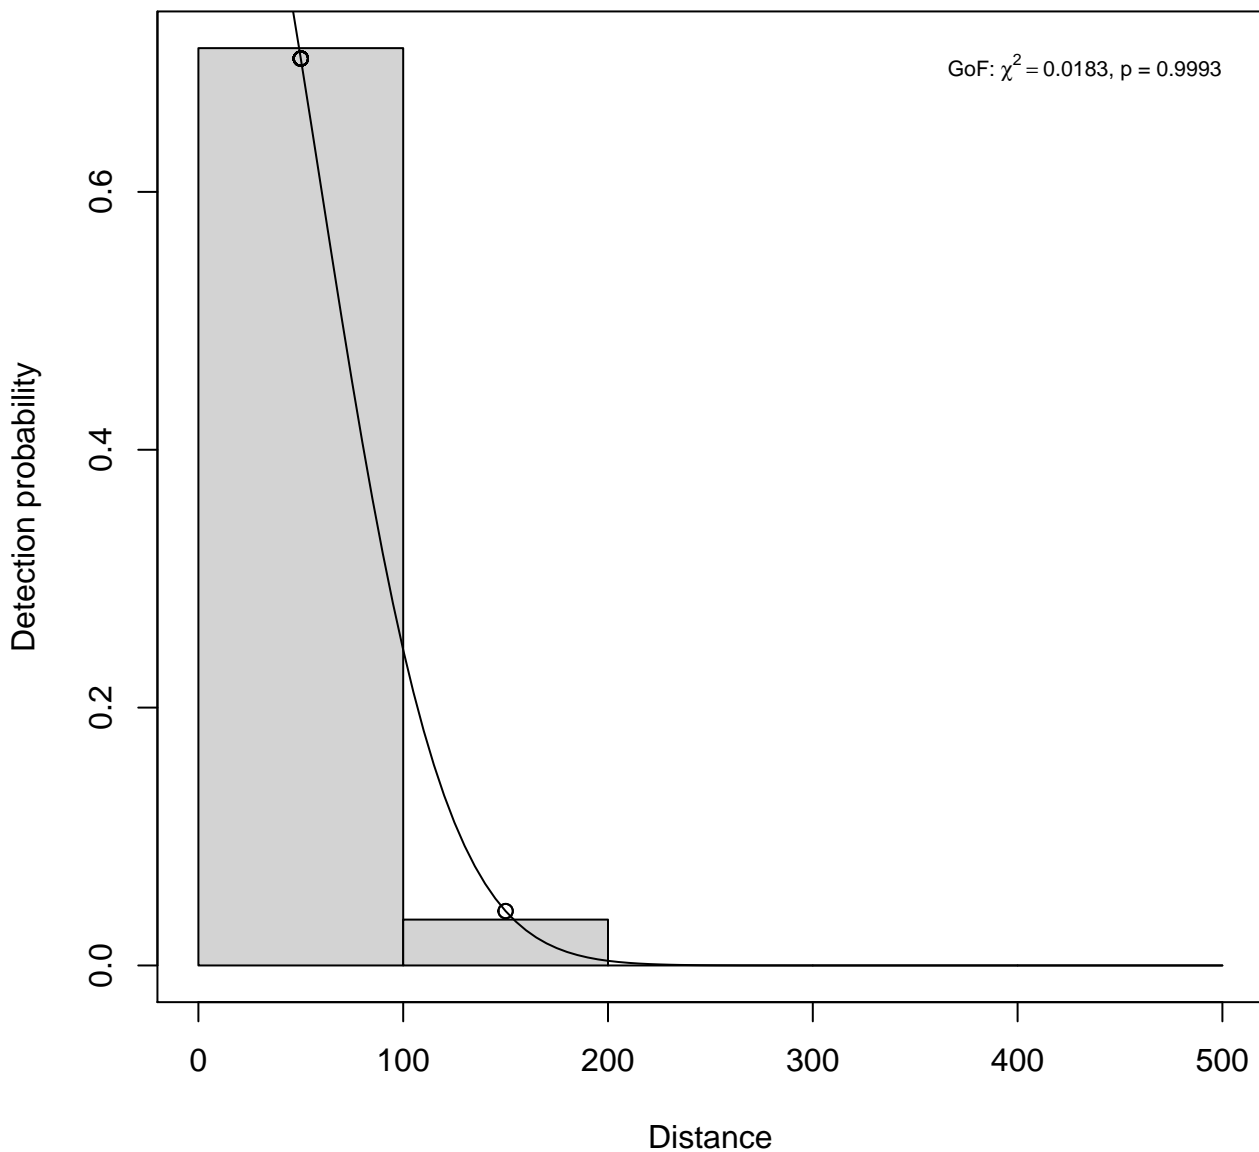

Supplement: s1 [file s1]
