# Supplementary material
Source: MDPI journal article supplement (https://www.mdpi.com/1424-2818/13/7/300)

# **Psittacula krameri – Terai-Duar savanna and grasslands – India**

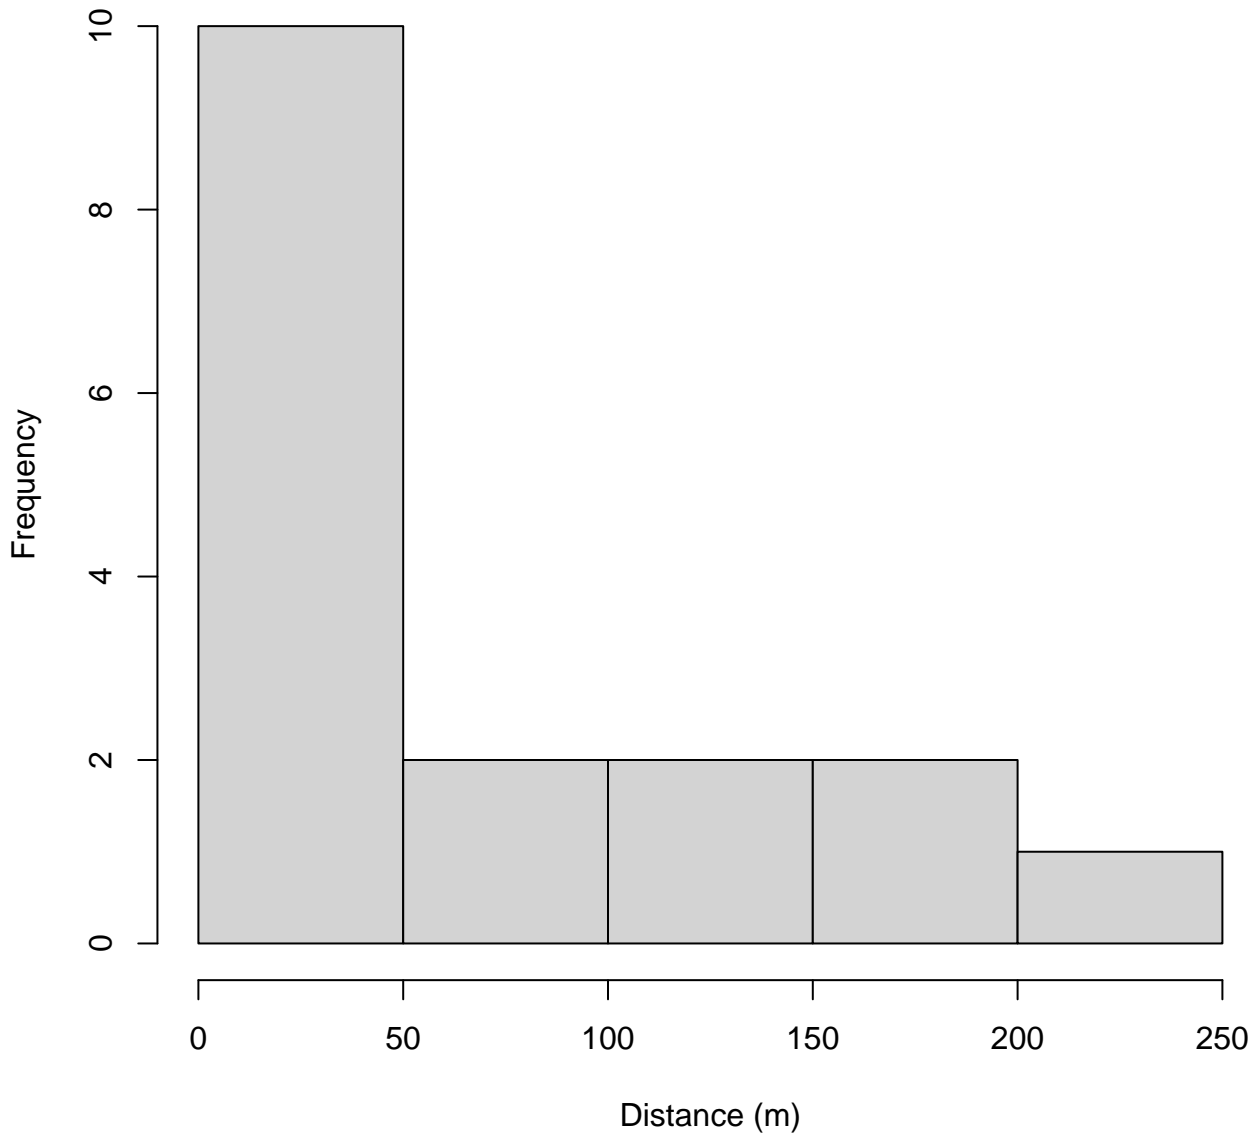

# Psittacula krameri – Terai–Duar savanna and grasslands – India

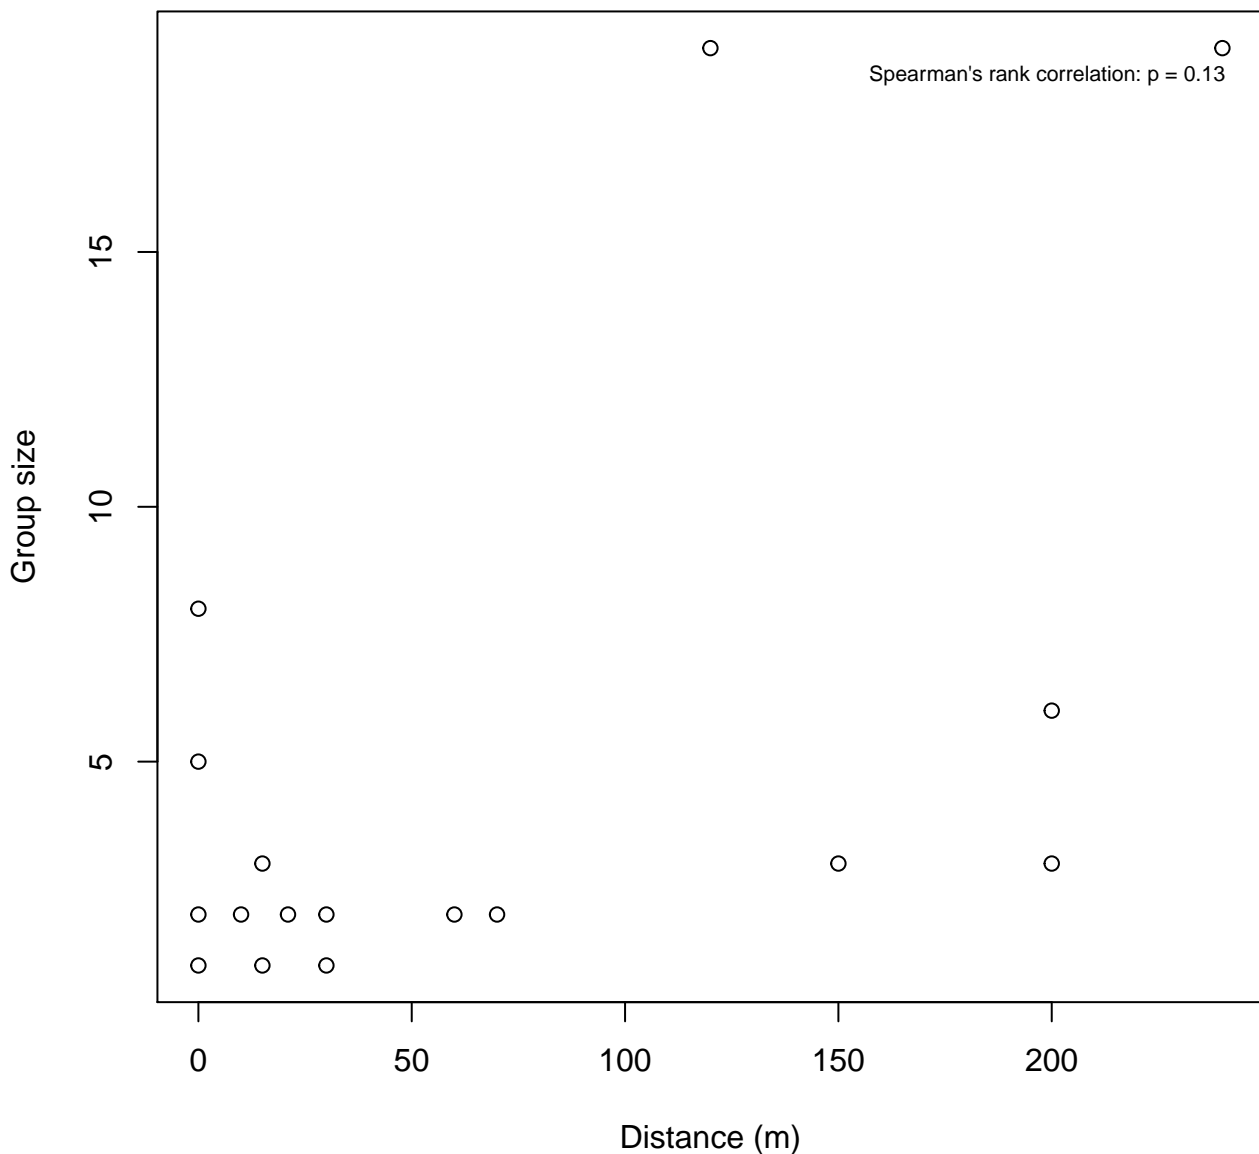

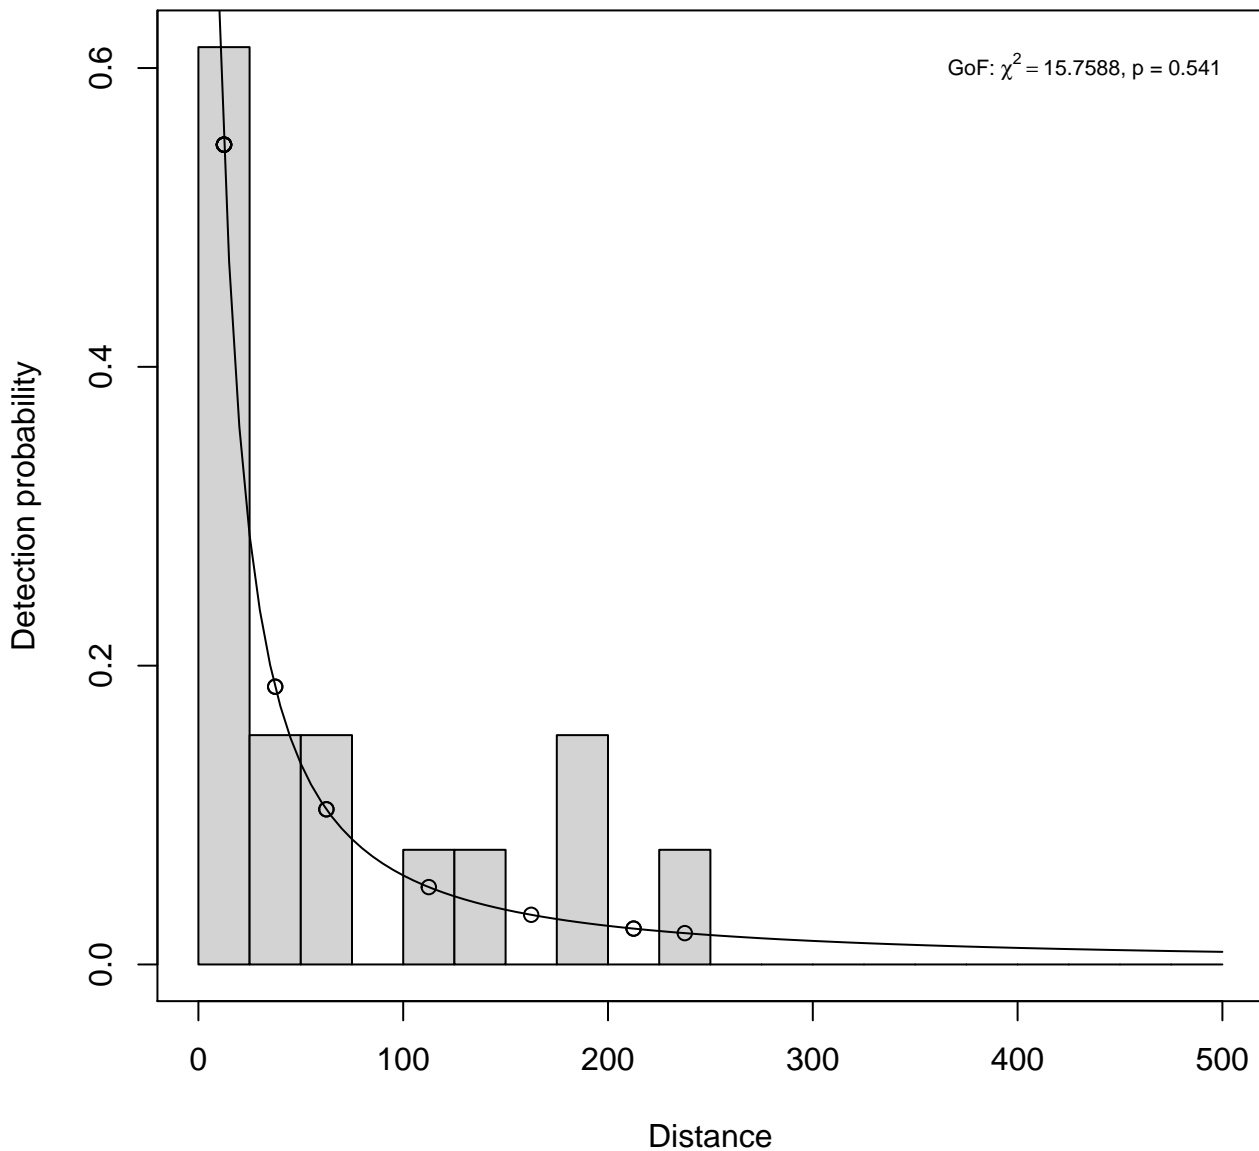

*Psittacula krameri* – Terai–Duar savanna and grasslands – India (N = 17, key function = hn)

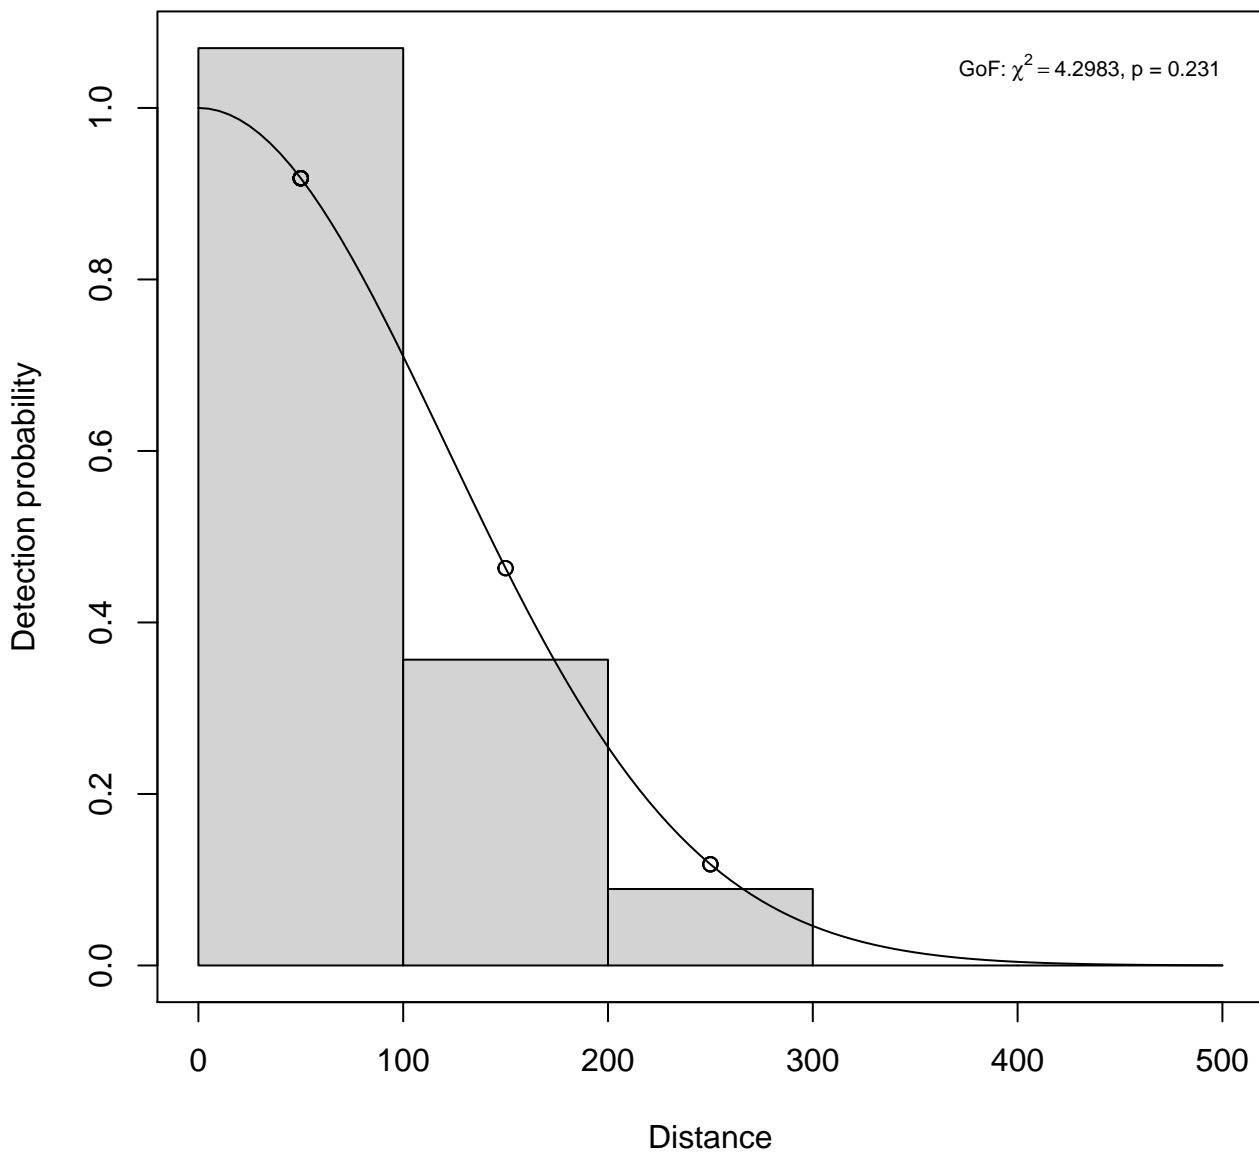

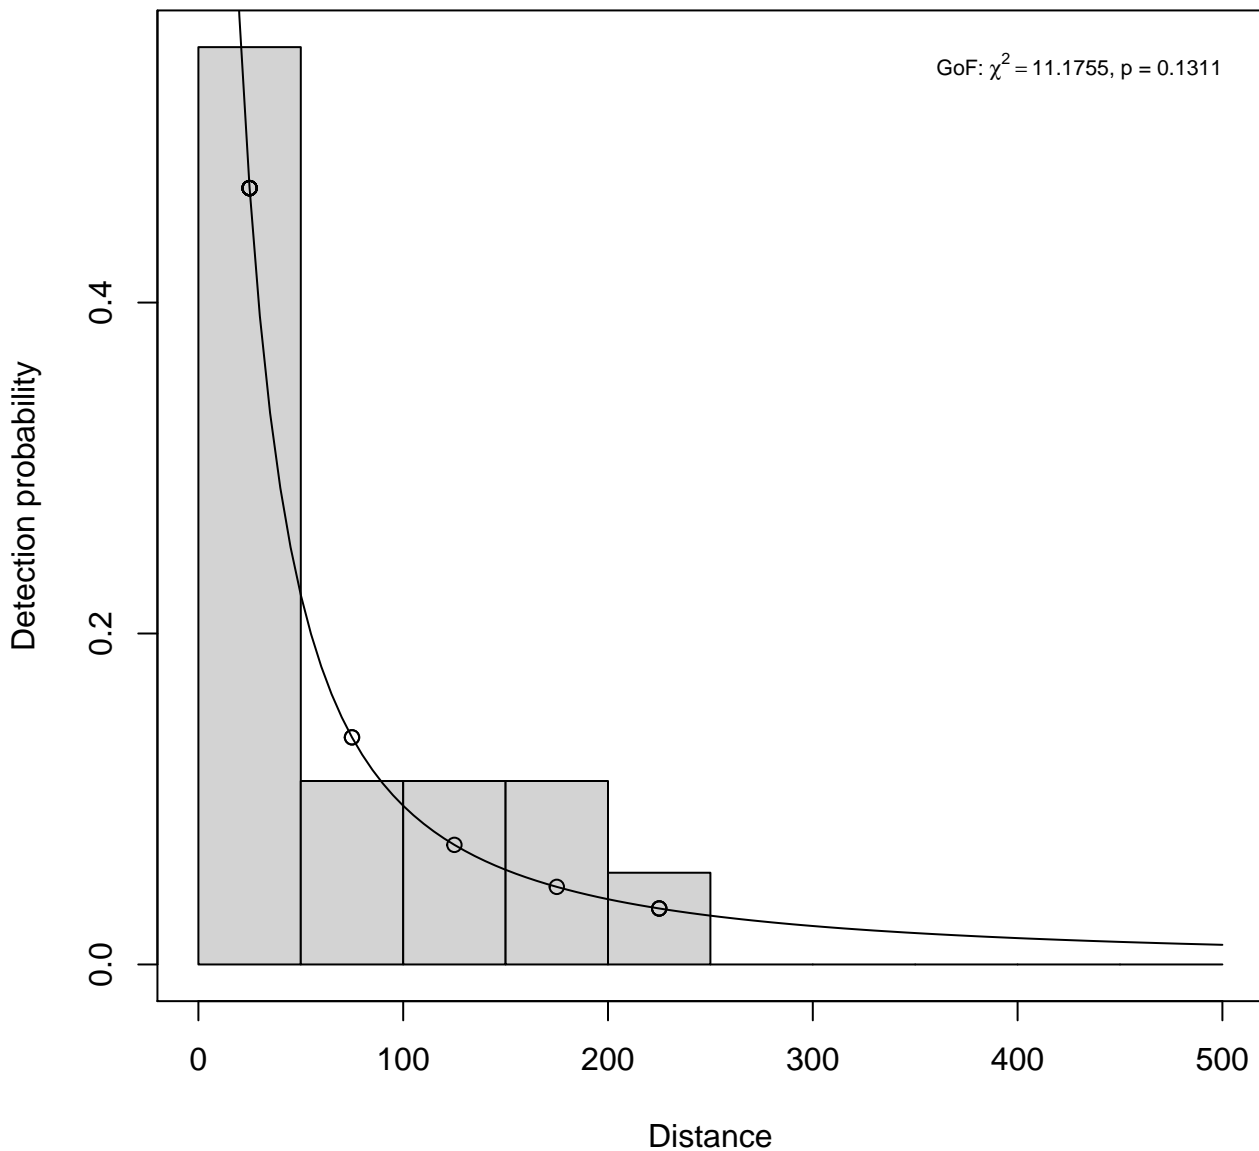

Supplement: s1 [file s1]
