# Supplementary material
Source: MDPI journal article supplement (https://www.mdpi.com/1424-2818/13/7/300)

# Psittacara leucophthalmus – Beni savanna – Bolivia

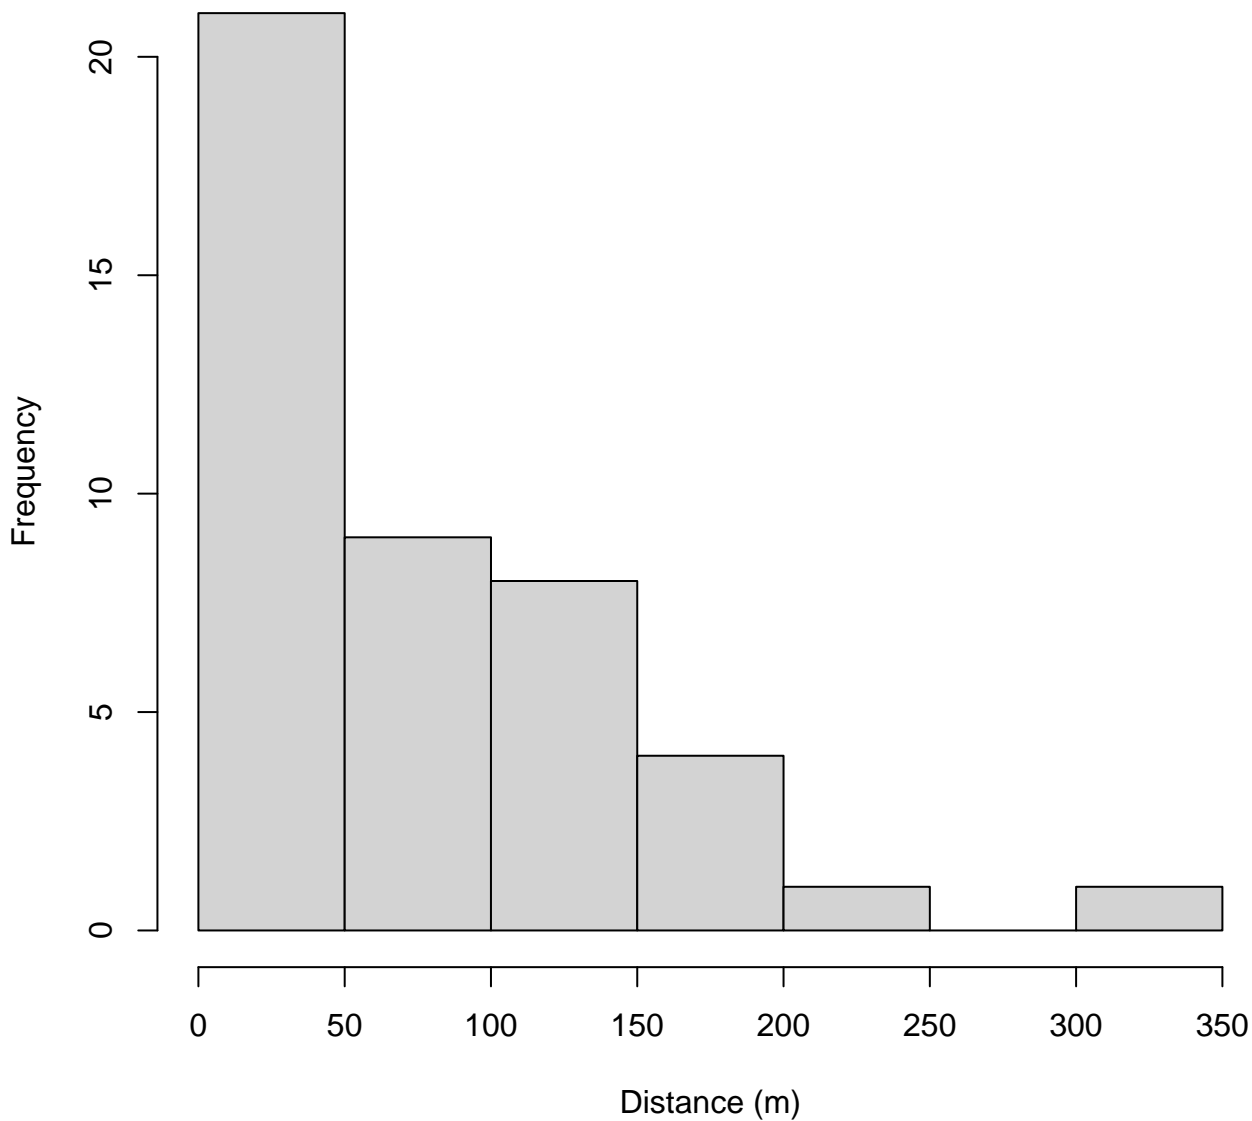

# Psittacara leucophthalmus – Beni savanna – Bolivia

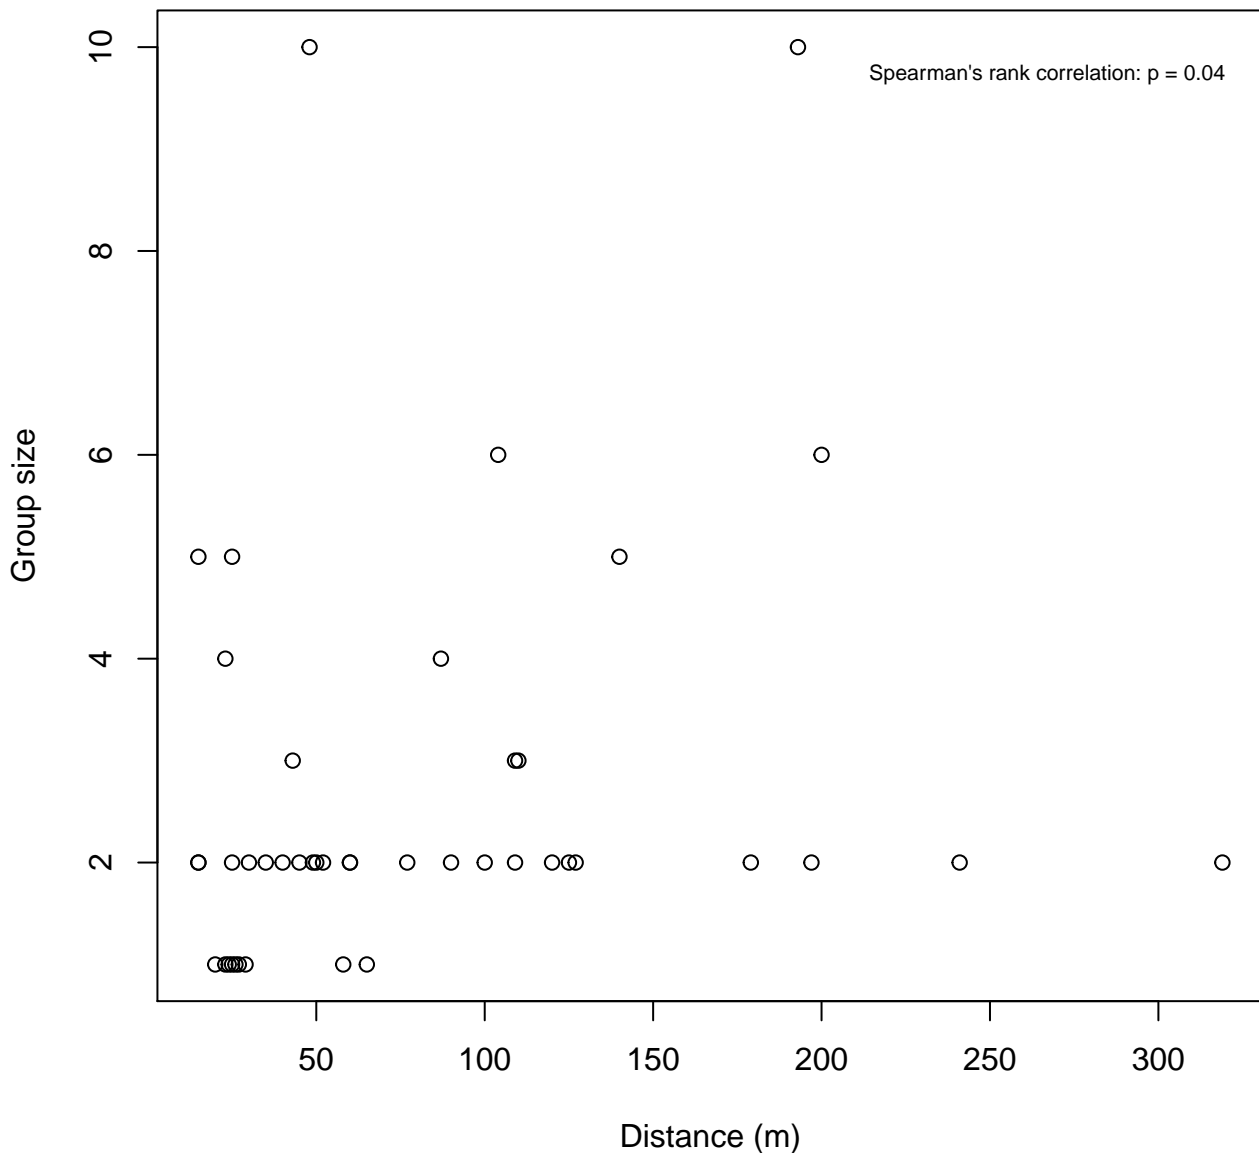

Psittacara leucophthalmus – Beni savanna – Bolivia (N = 44, key function = hn)

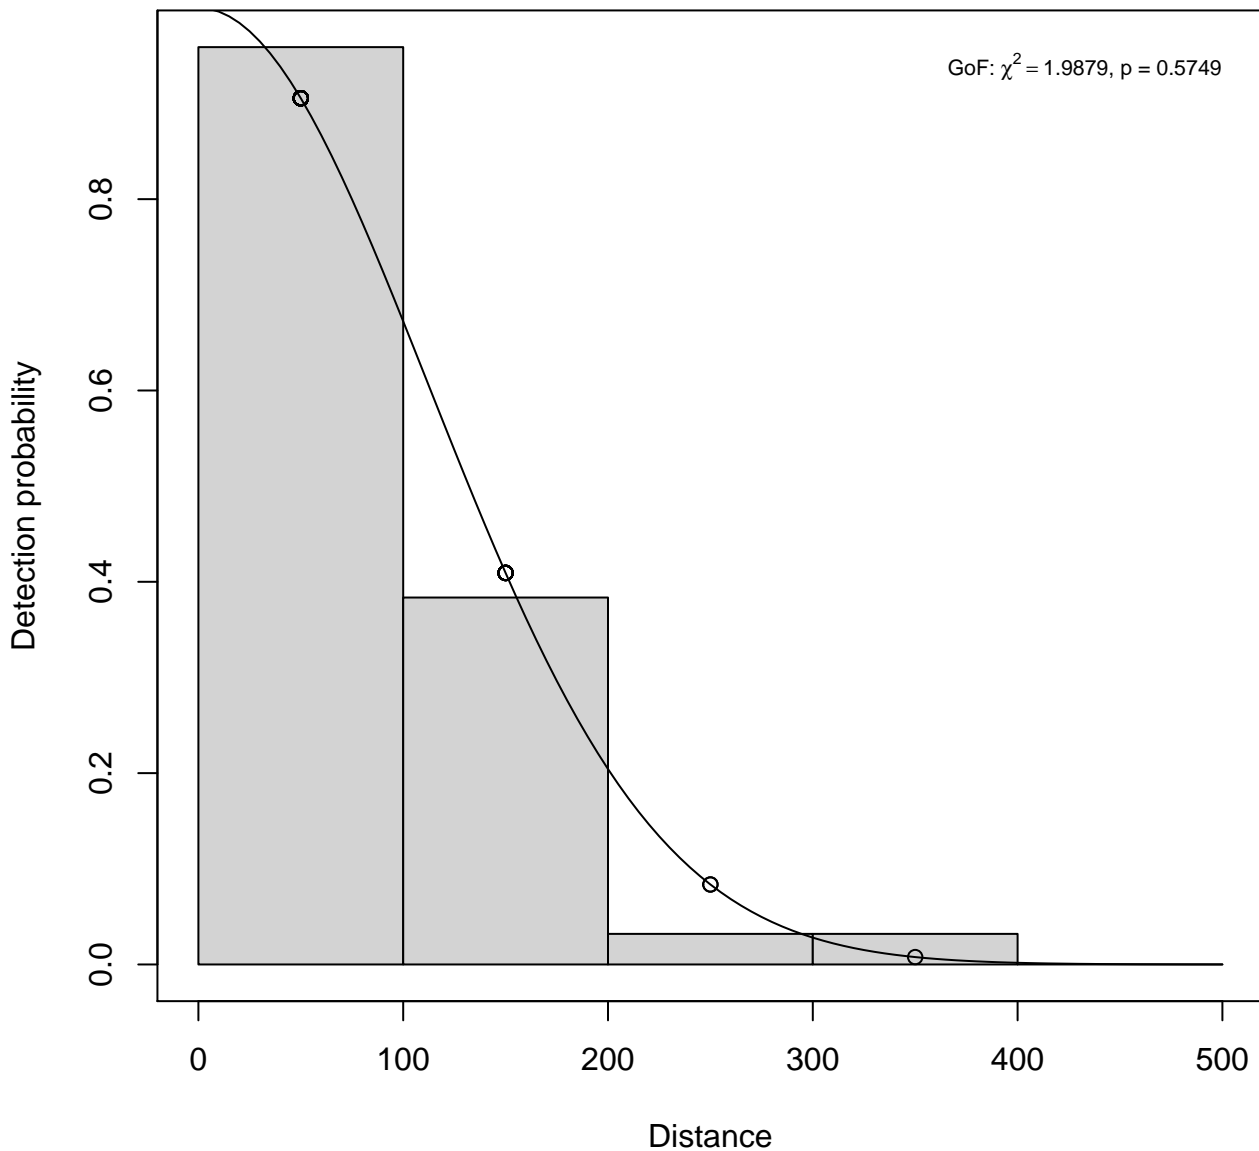

Psittacara leucophthalmus – Beni savanna – Bolivia (N = 44, key function = hn)

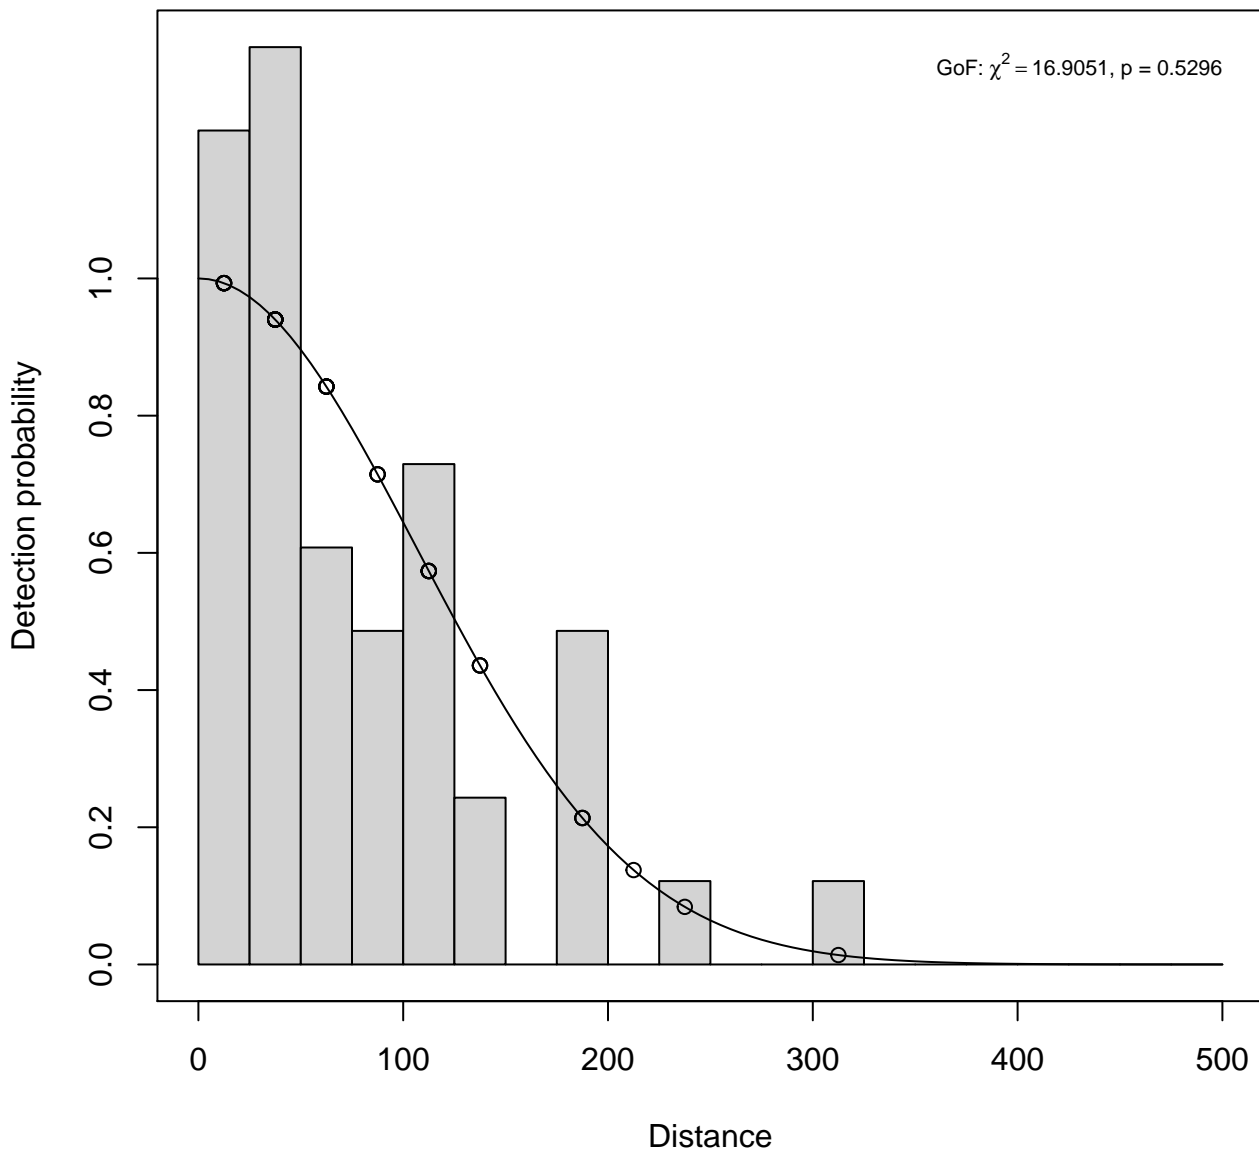

*Psittacara leucophthalmus* – Beni savanna – Bolivia (N = 44, key function = hn)

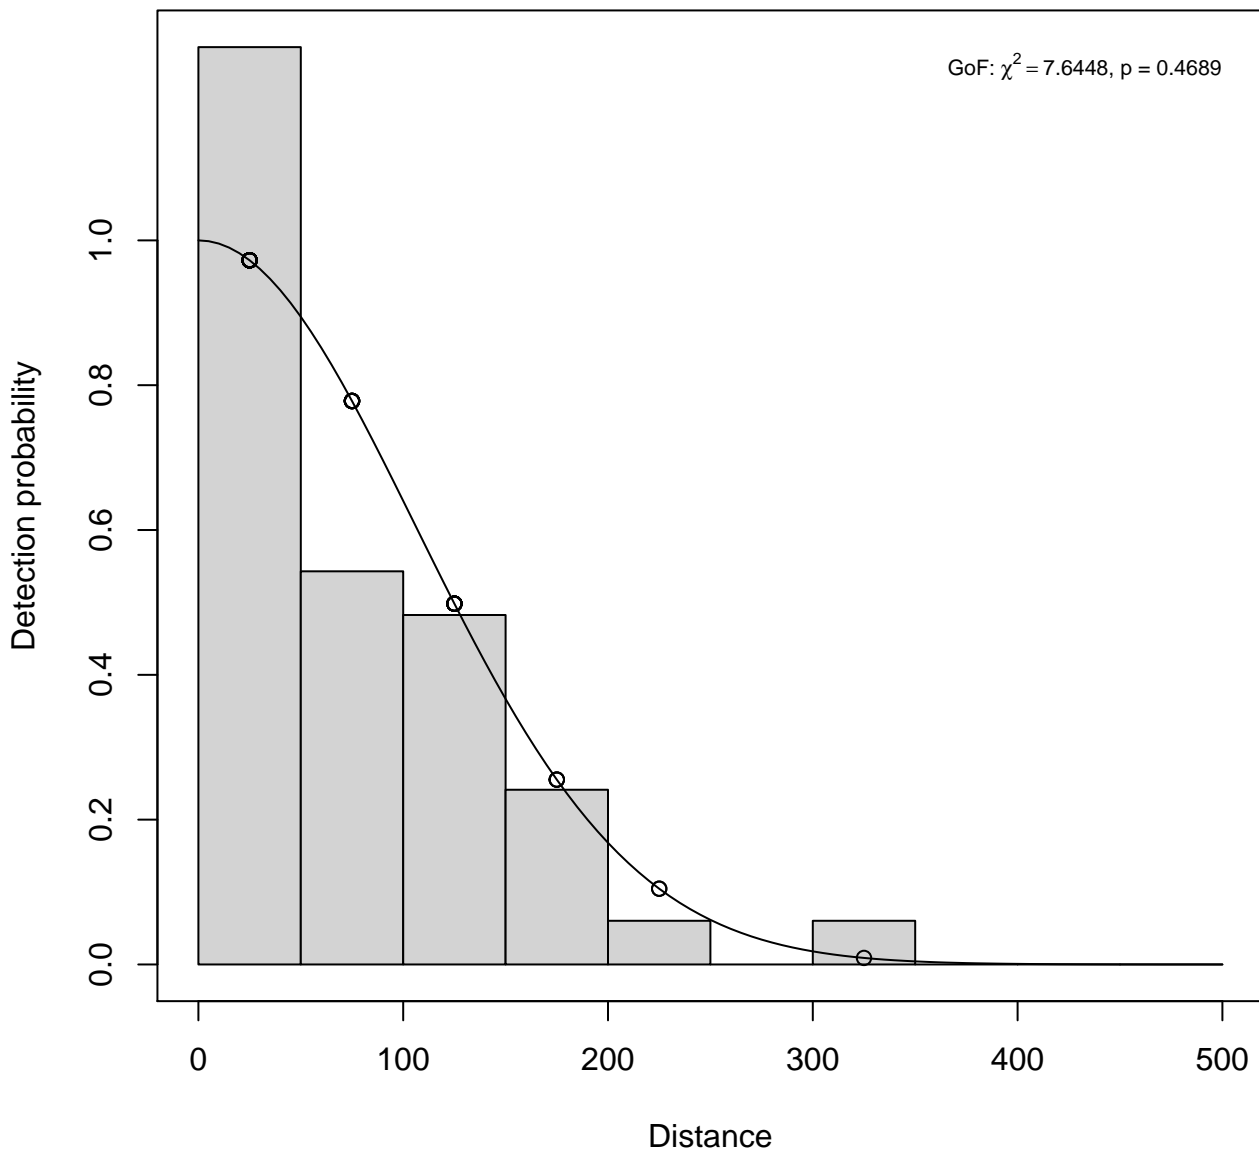

Supplement: s1 [file s1]
