# Supplementary material
Source: MDPI journal article supplement (https://www.mdpi.com/1424-2818/13/7/300)

# Pionus maximiliani – Southern Andean Yungas – Argentina

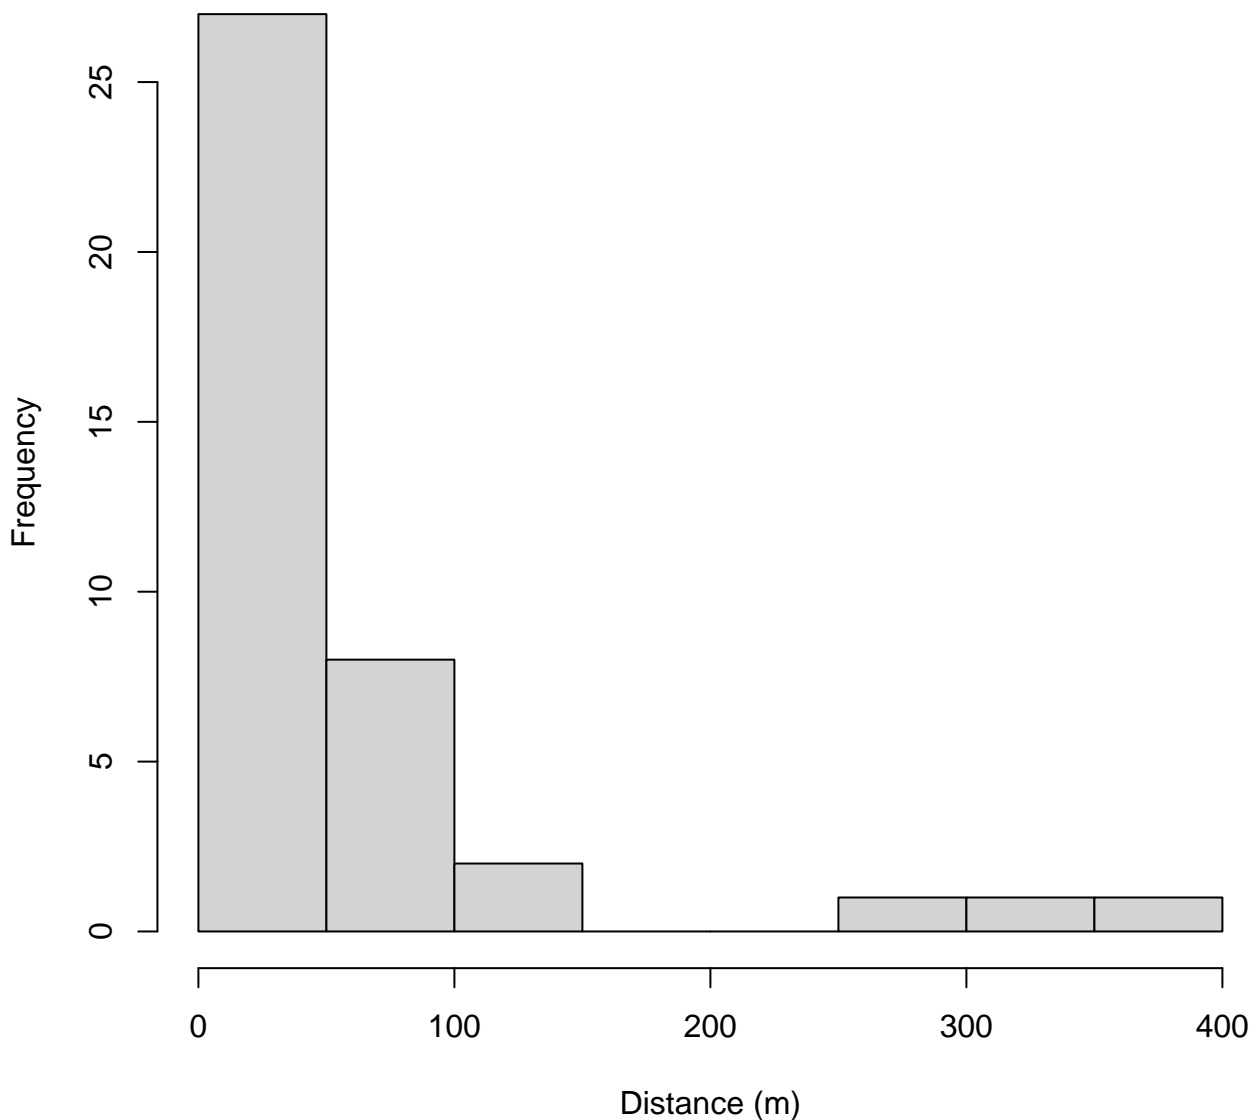

# Pionus maximiliani – Southern Andean Yungas – Argentina

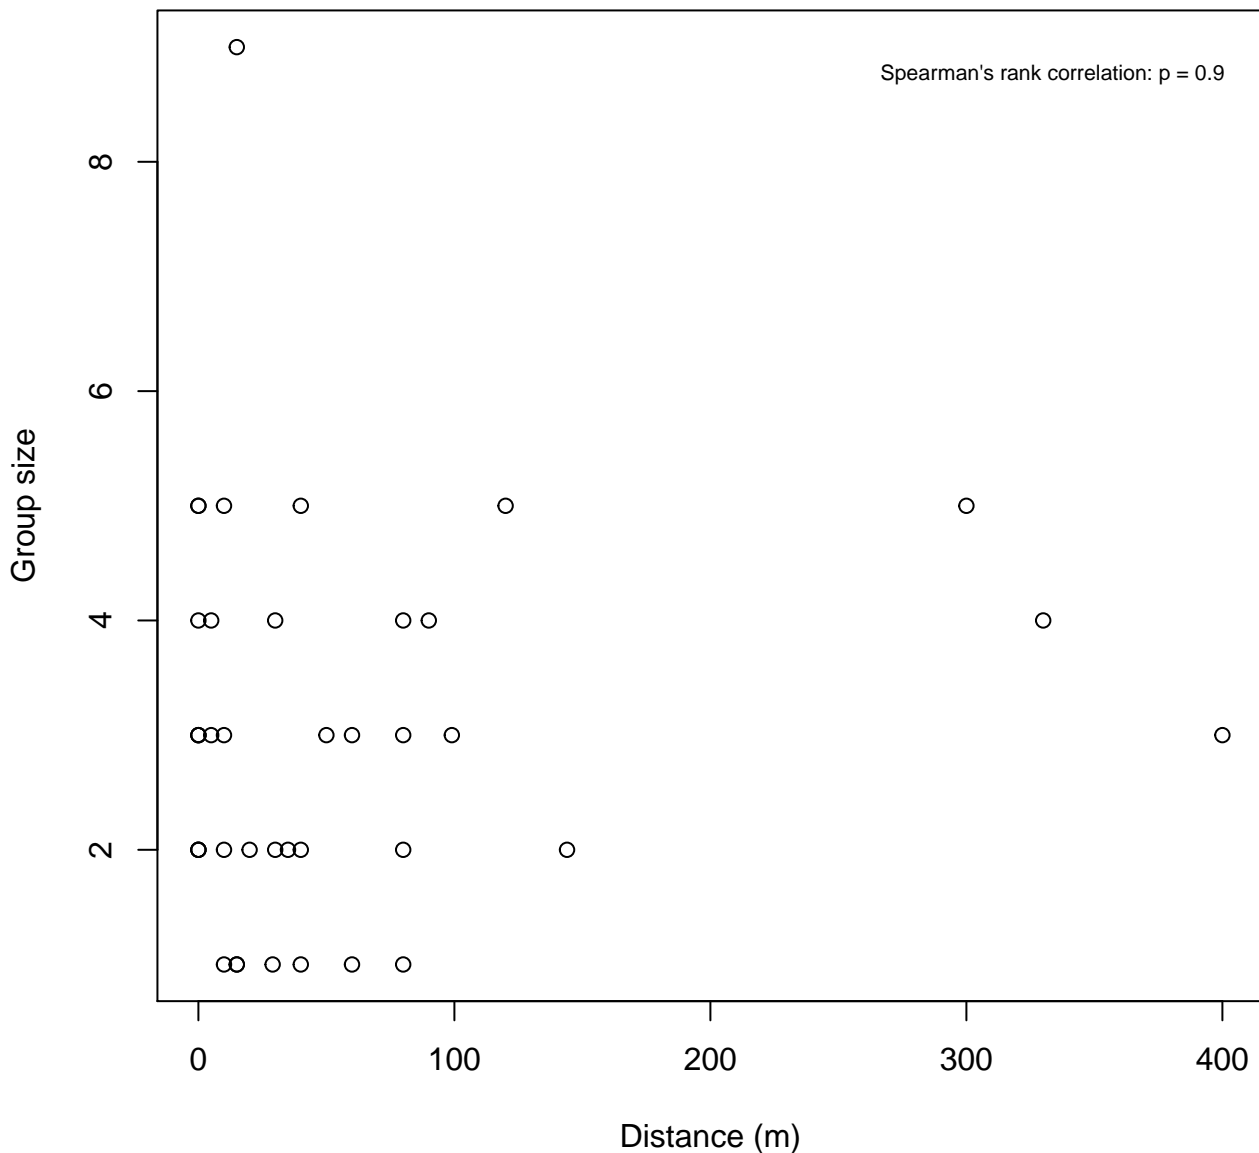

Pionus maximiliani – Southern Andean Yungas – Argentina (N = 40, key function = hr)

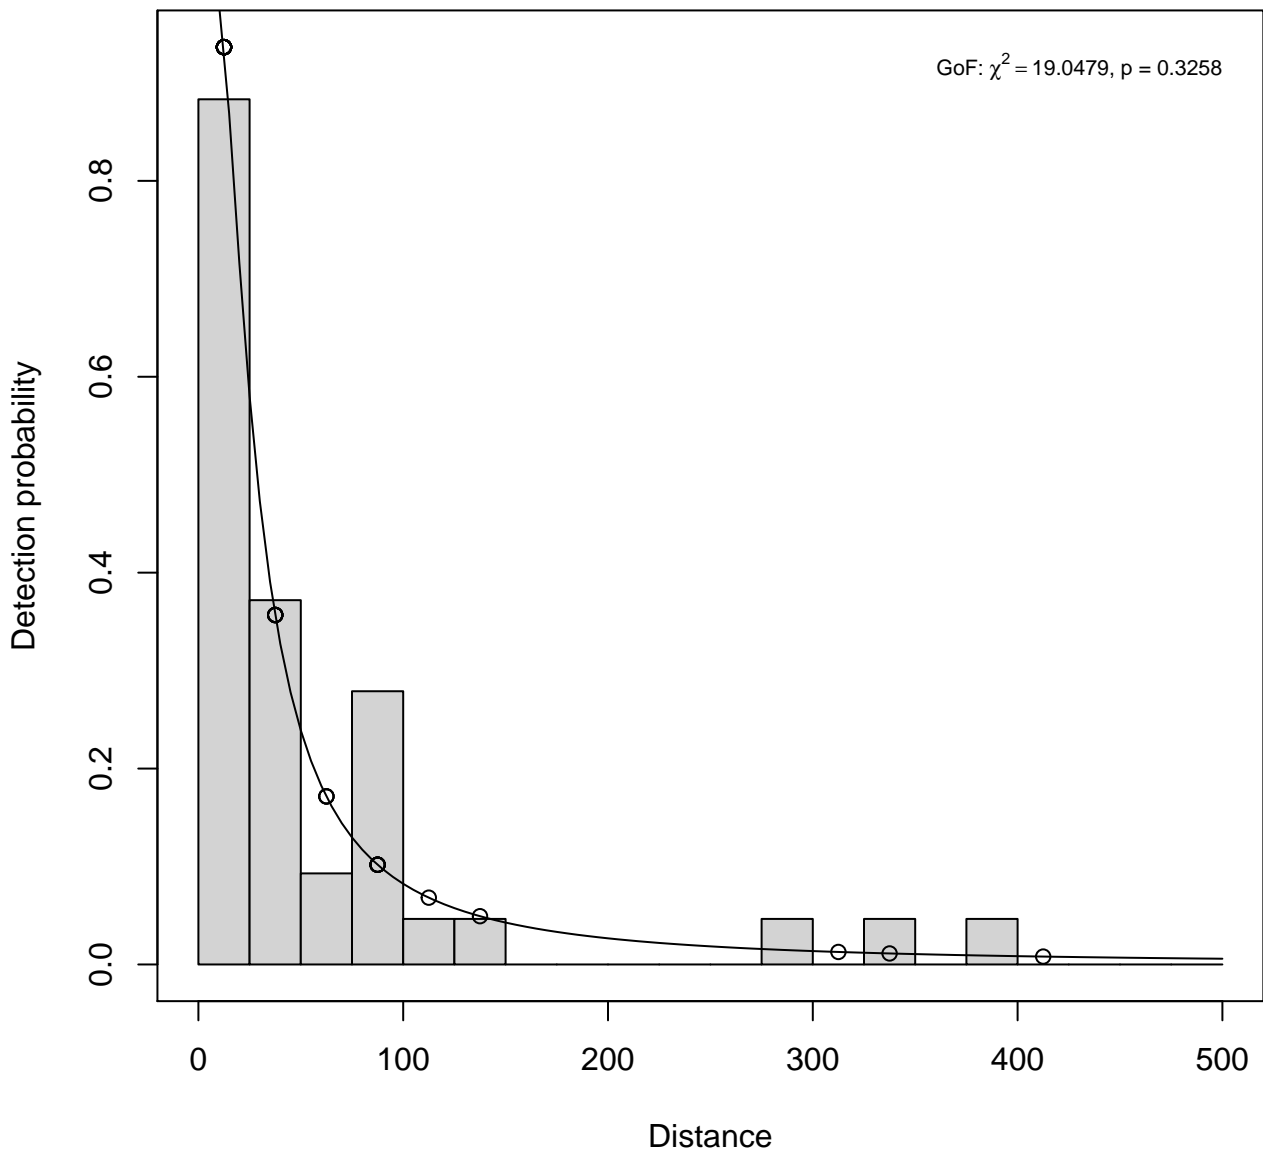

*Pionus maximiliani* – Southern Andean Yungas – Argentina (N = 40, key function = hr)

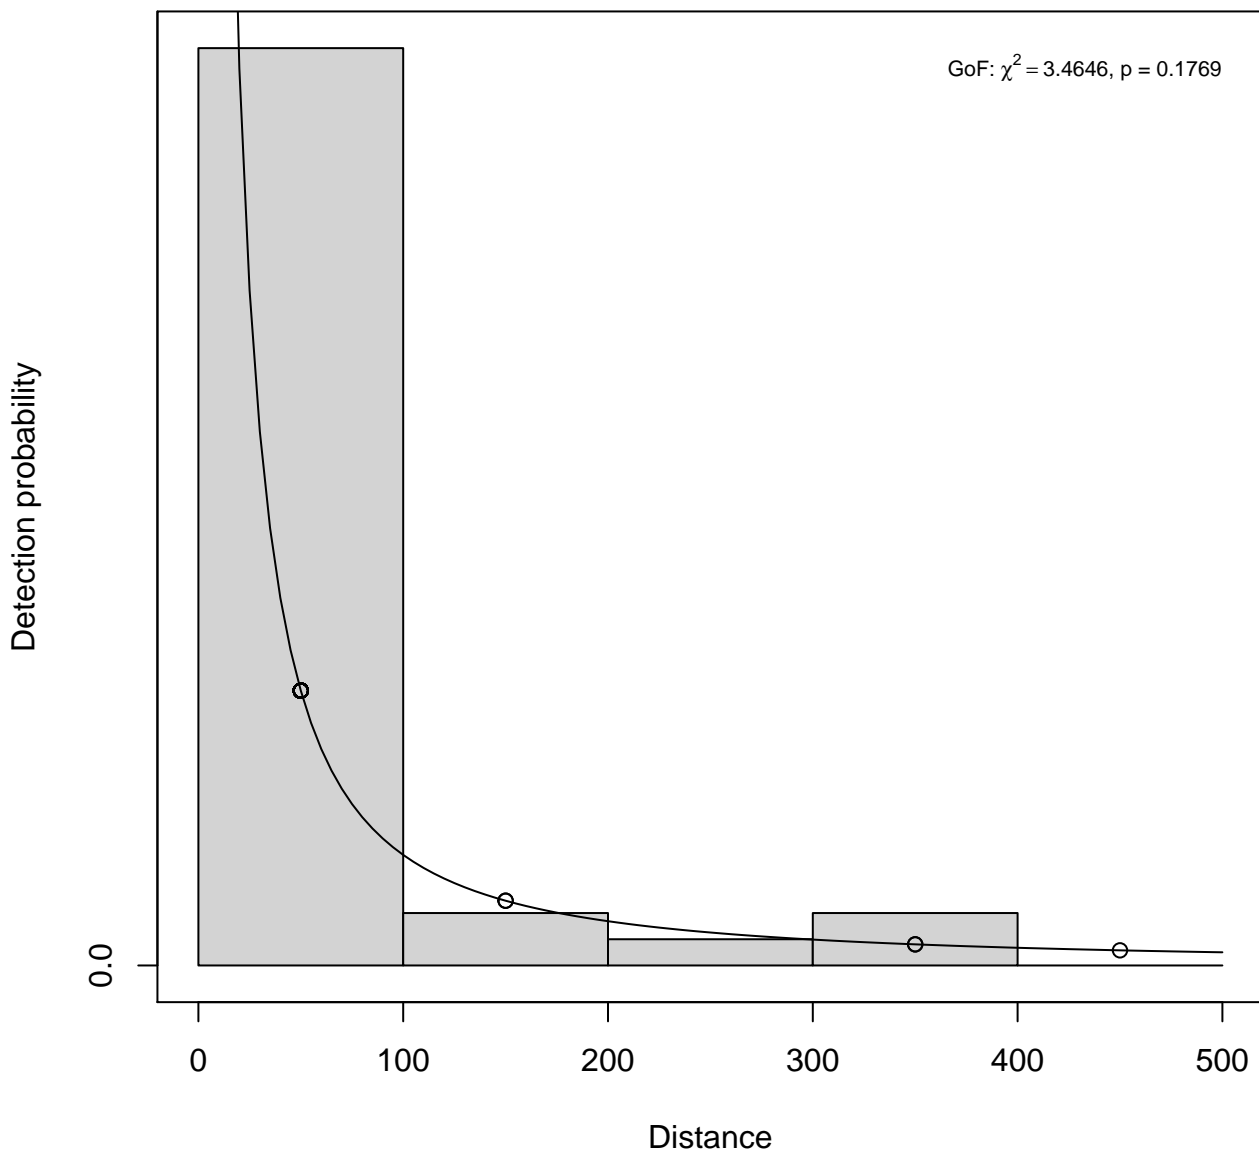

Pionus maximiliani – Southern Andean Yungas – Argentina (N = 40, key function = hr)

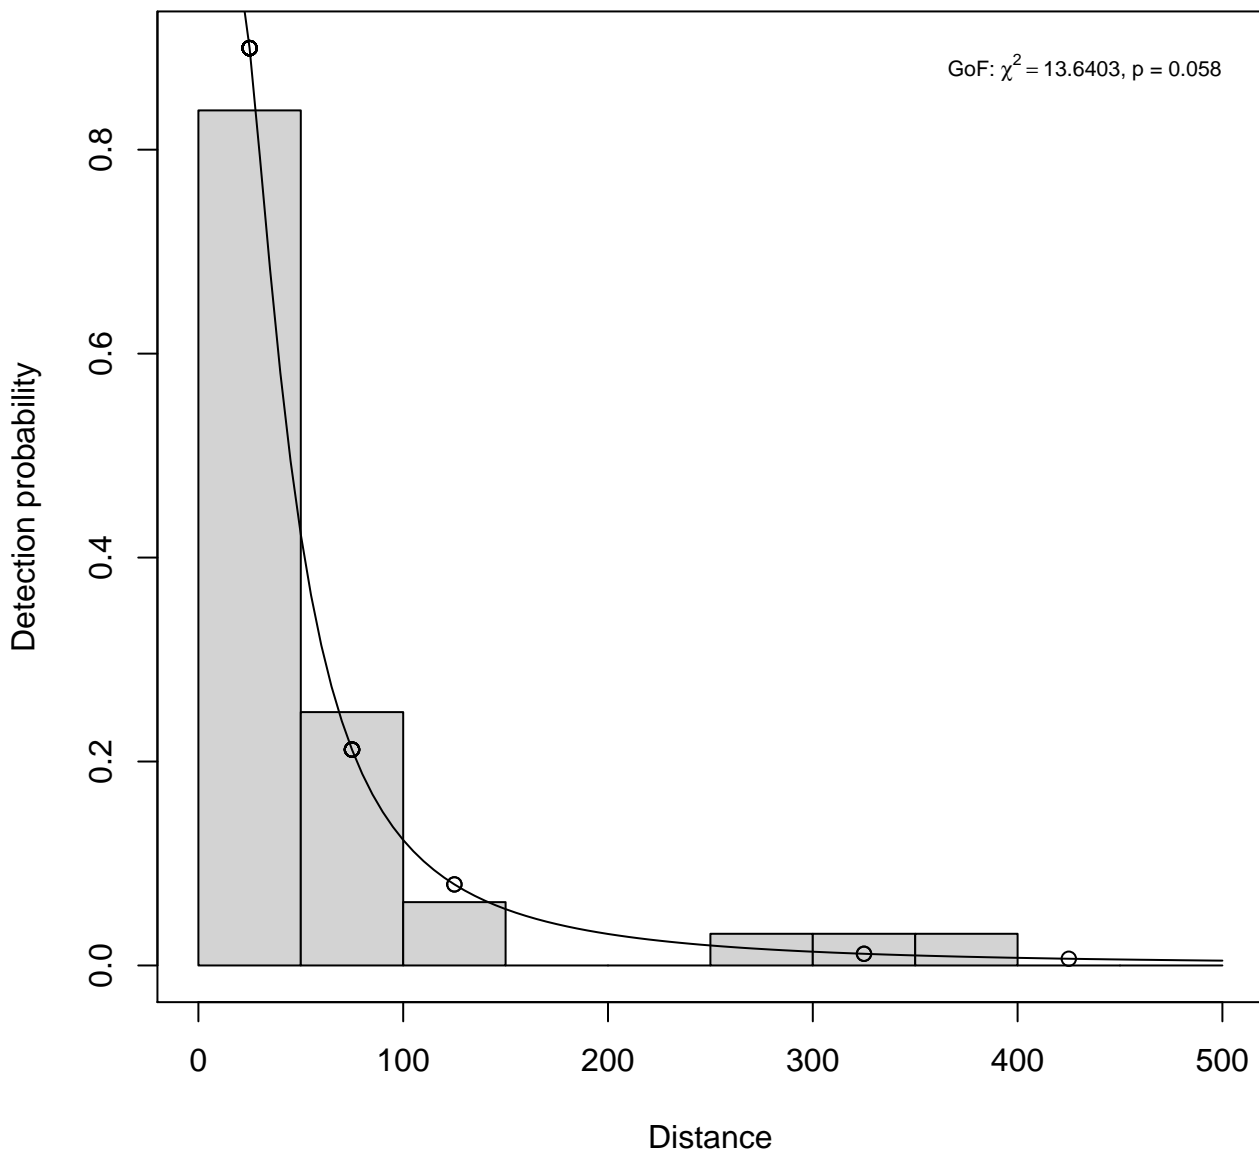

Supplement: s1 [file s1]
