# Supplementary material
Source: MDPI journal article supplement (https://www.mdpi.com/1424-2818/13/7/300)

# Amazona aestiva – Bolivian montane dry forests – Bolivia

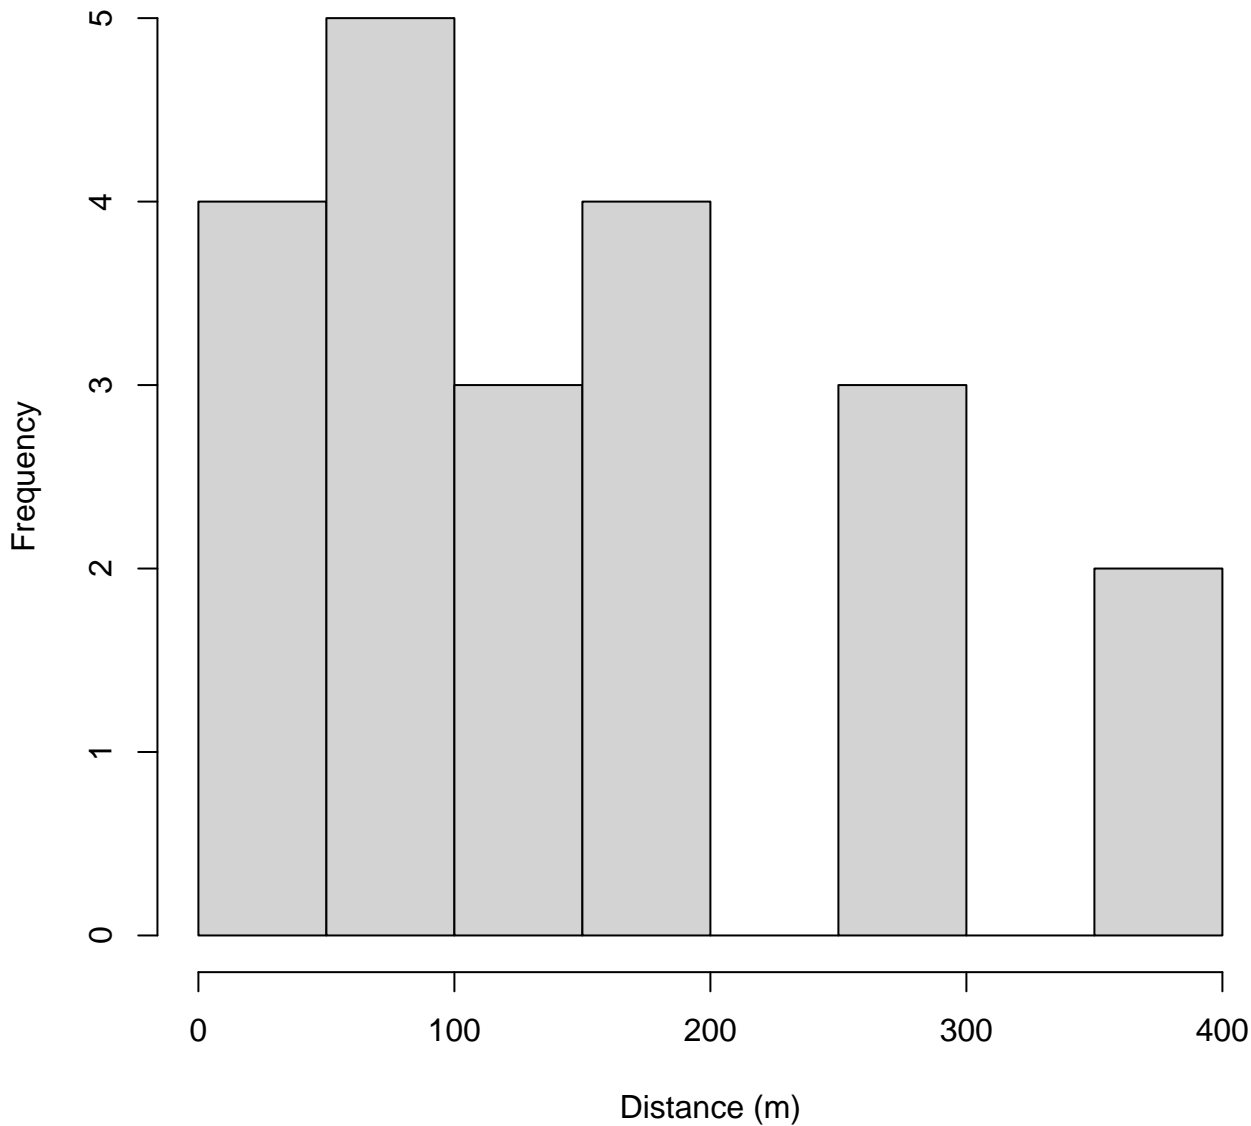

# Amazona aestiva – Bolivian montane dry forests – Bolivia

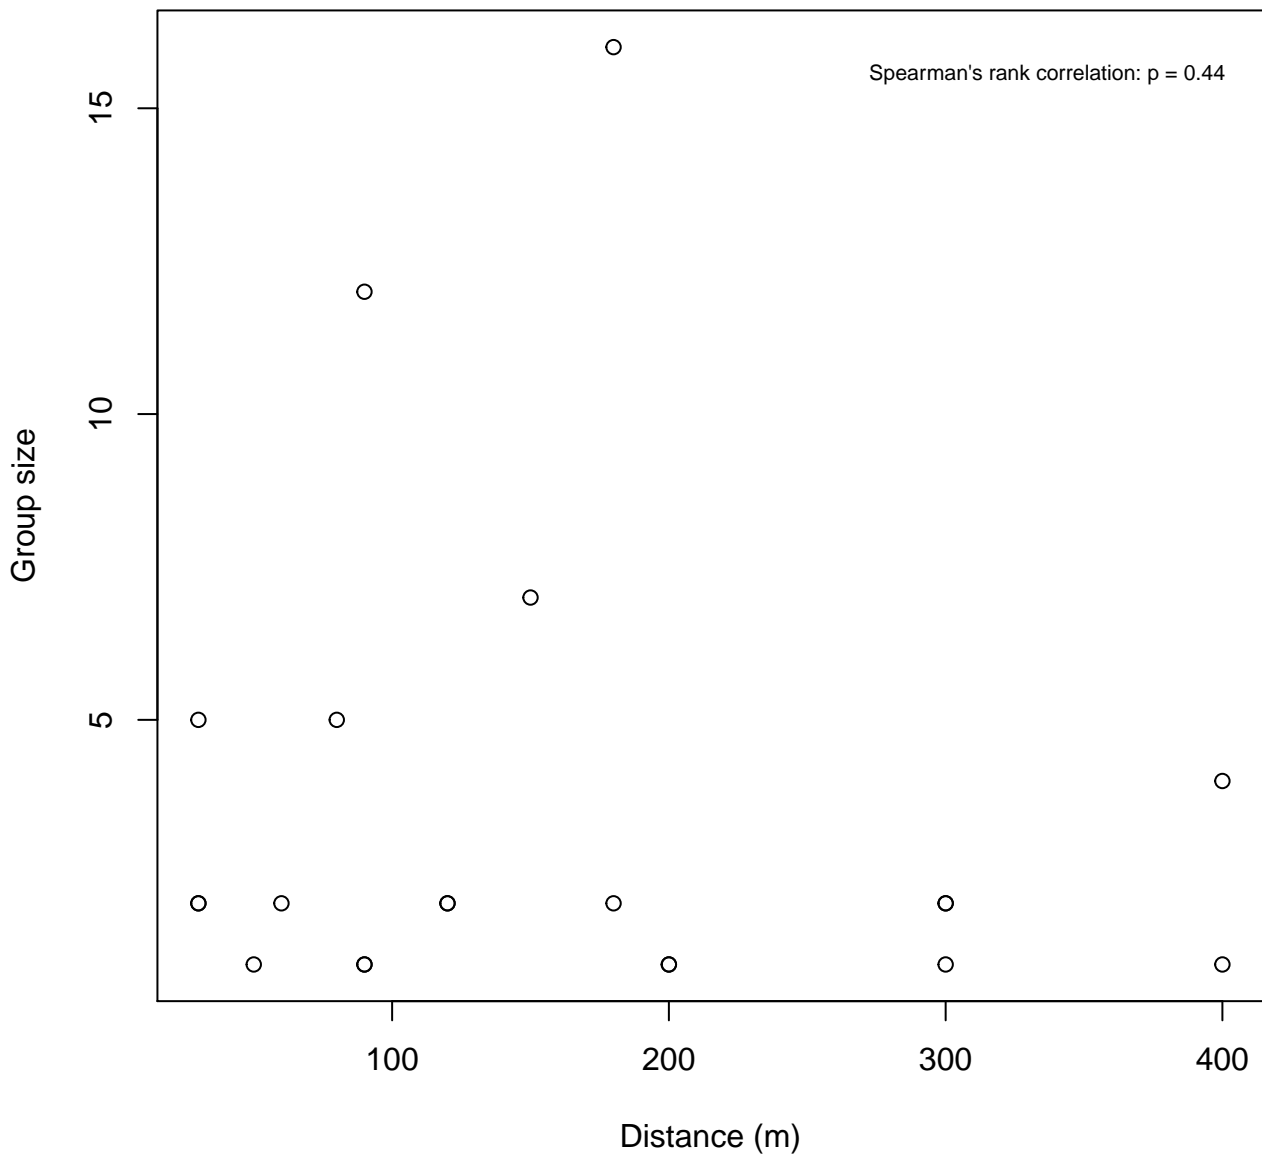

*Amazona aestiva* – Bolivian montane dry forests – Bolivia (N = 21, key function = unif)

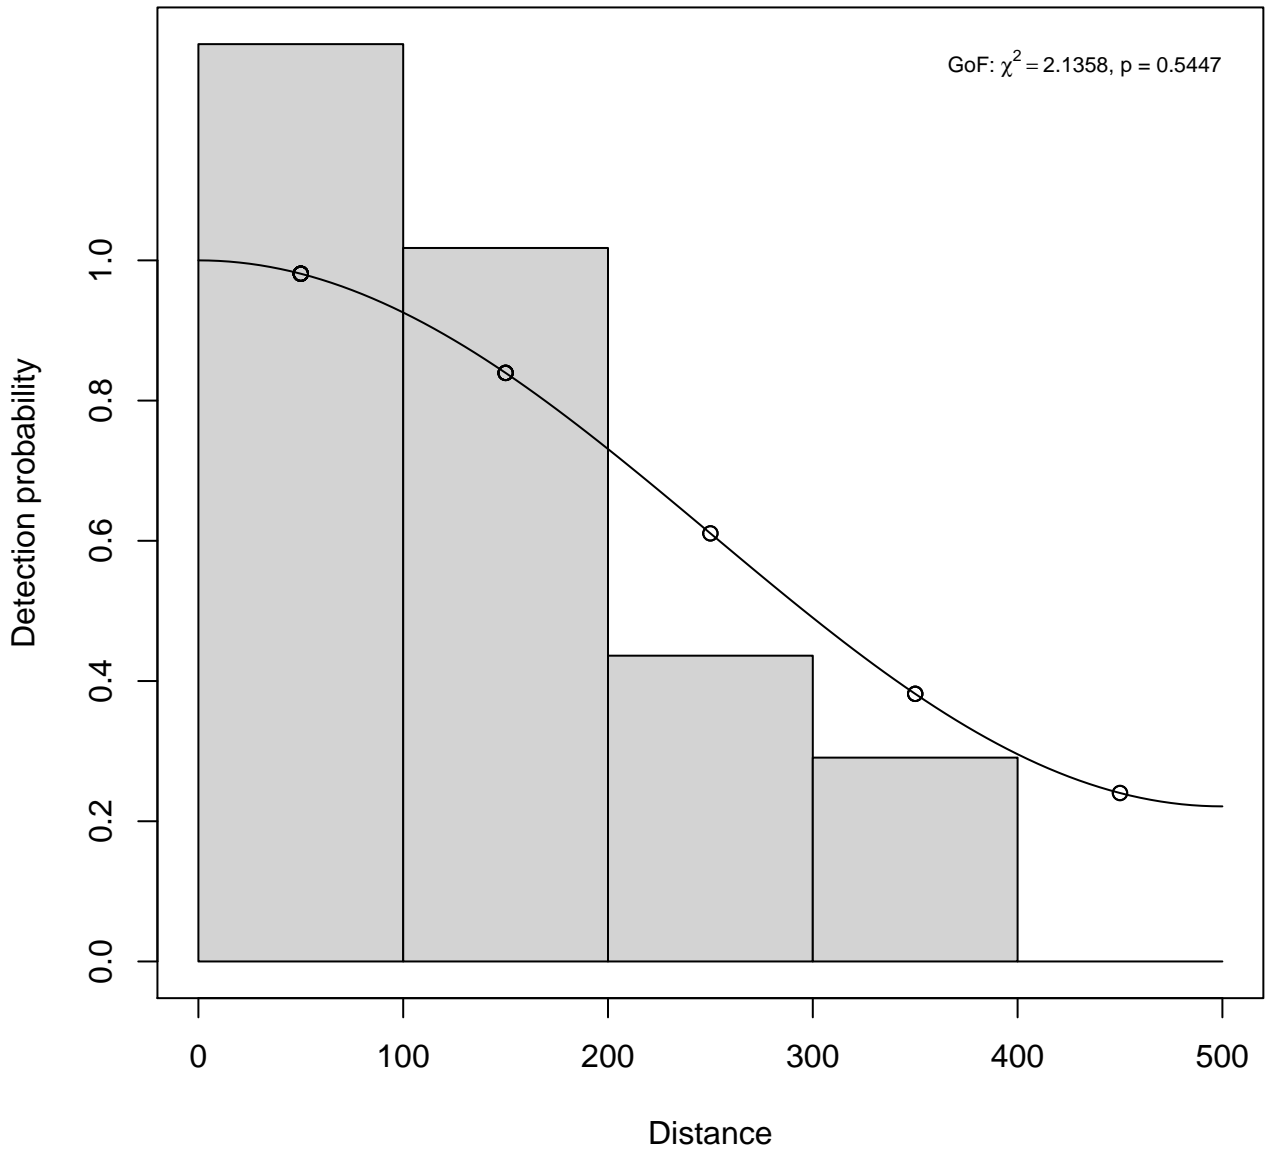

Amazona aestiva – Bolivian montane dry forests – Bolivia (N = 21, key function = hn)

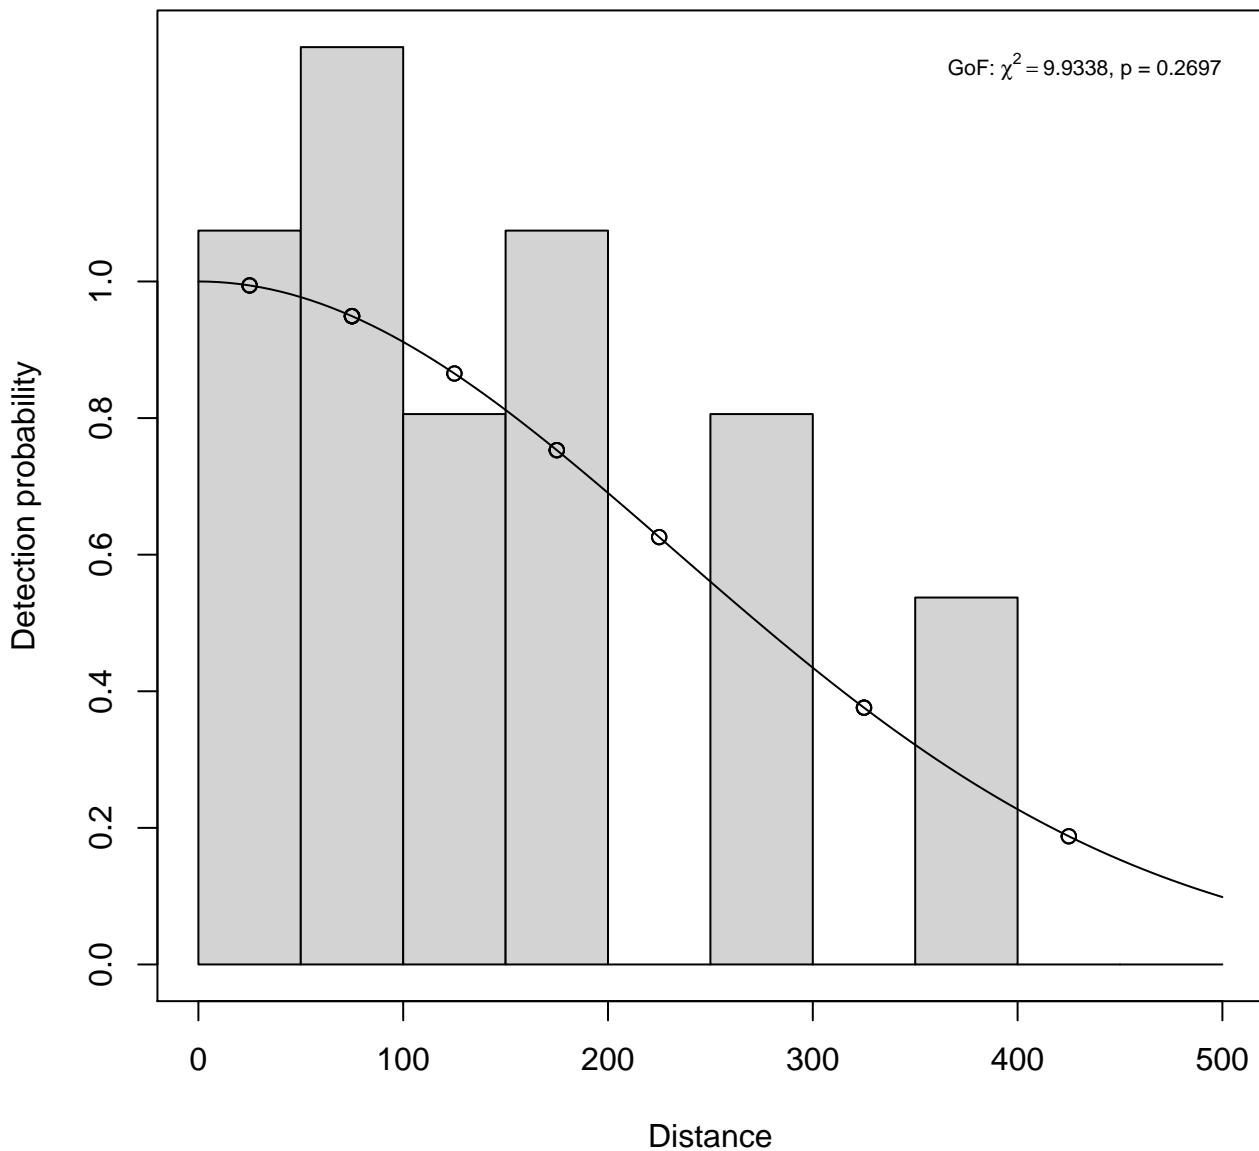

Amazona aestiva – Bolivian montane dry forests – Bolivia (N = 21, key function = hn)

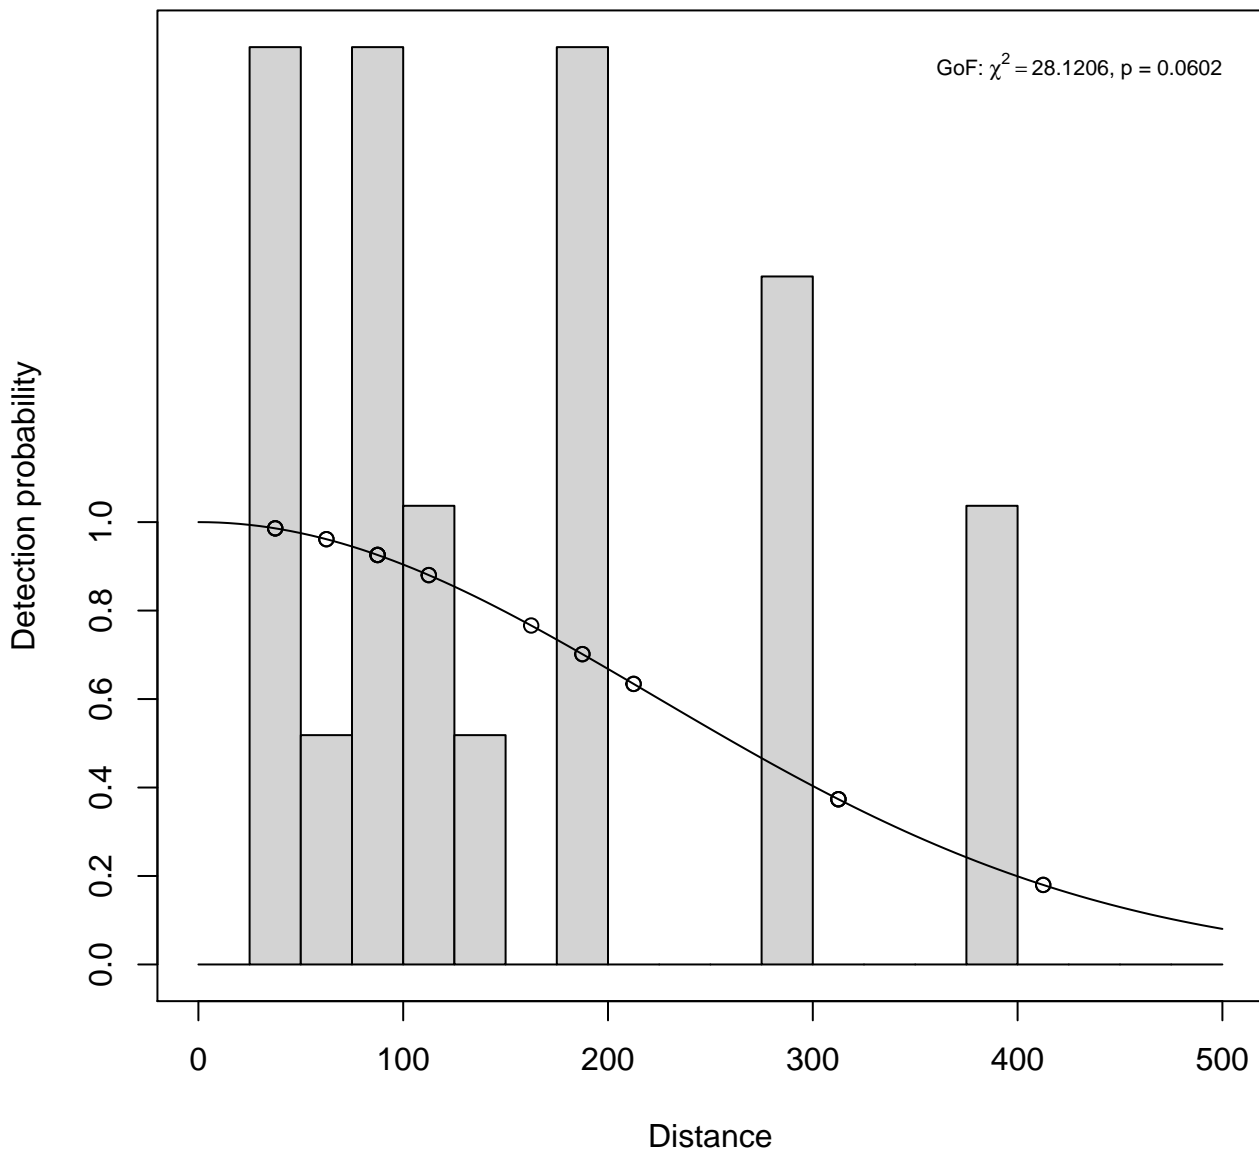

Supplement: s1 [file s1]
