# Supplementary material
Source: MDPI journal article supplement (https://www.mdpi.com/1424-2818/13/7/300)

# Diopsittaca cumanensis – Beni savanna – Bolivia

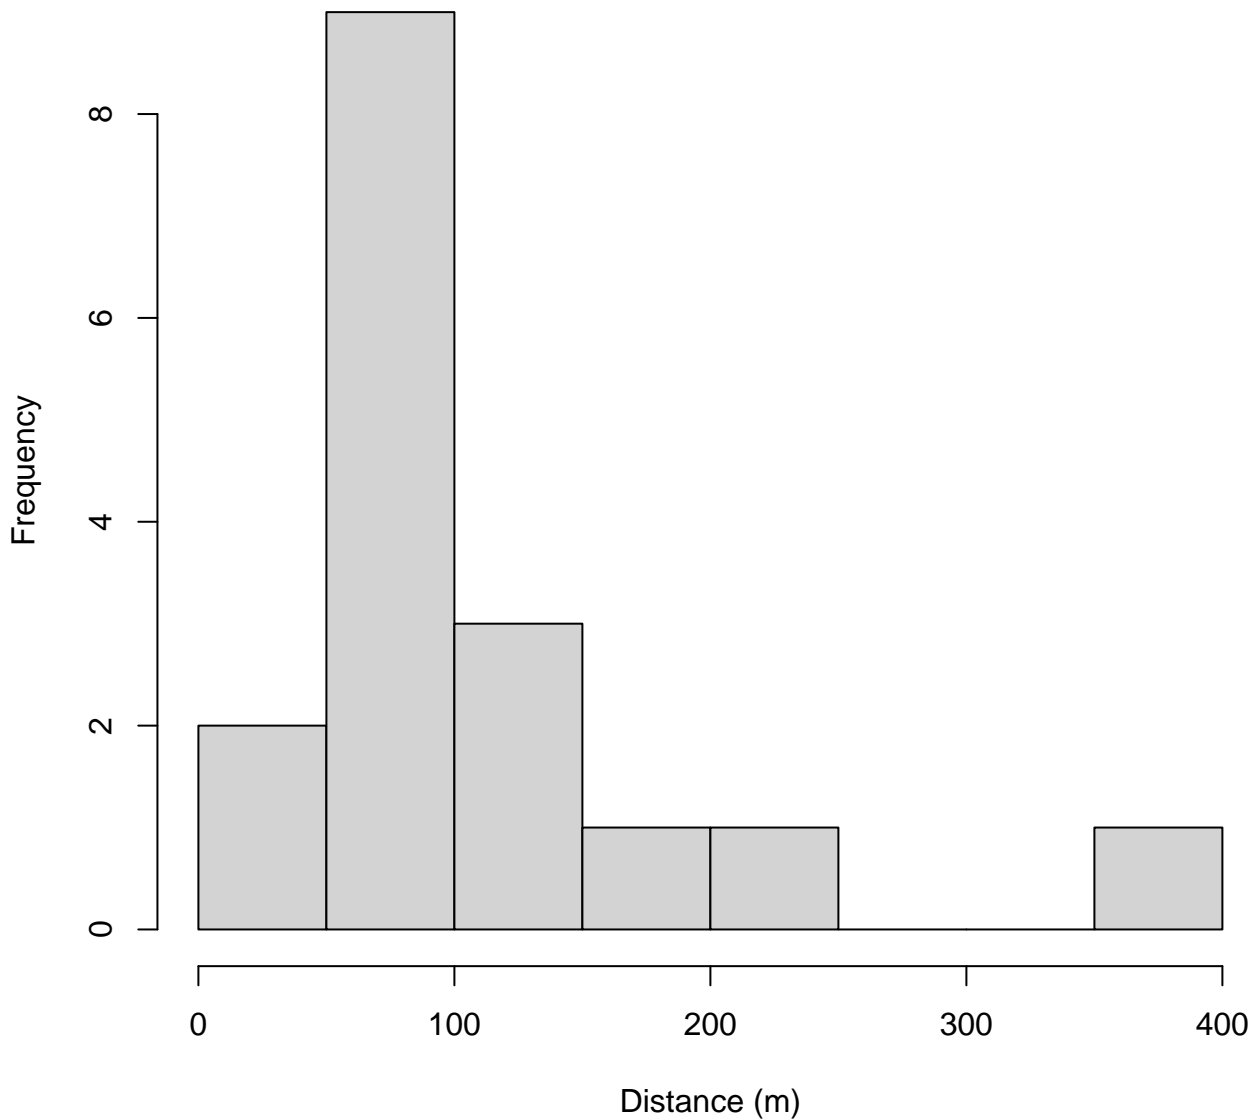

# Diopsittaca cumanensis – Beni savanna – Bolivia

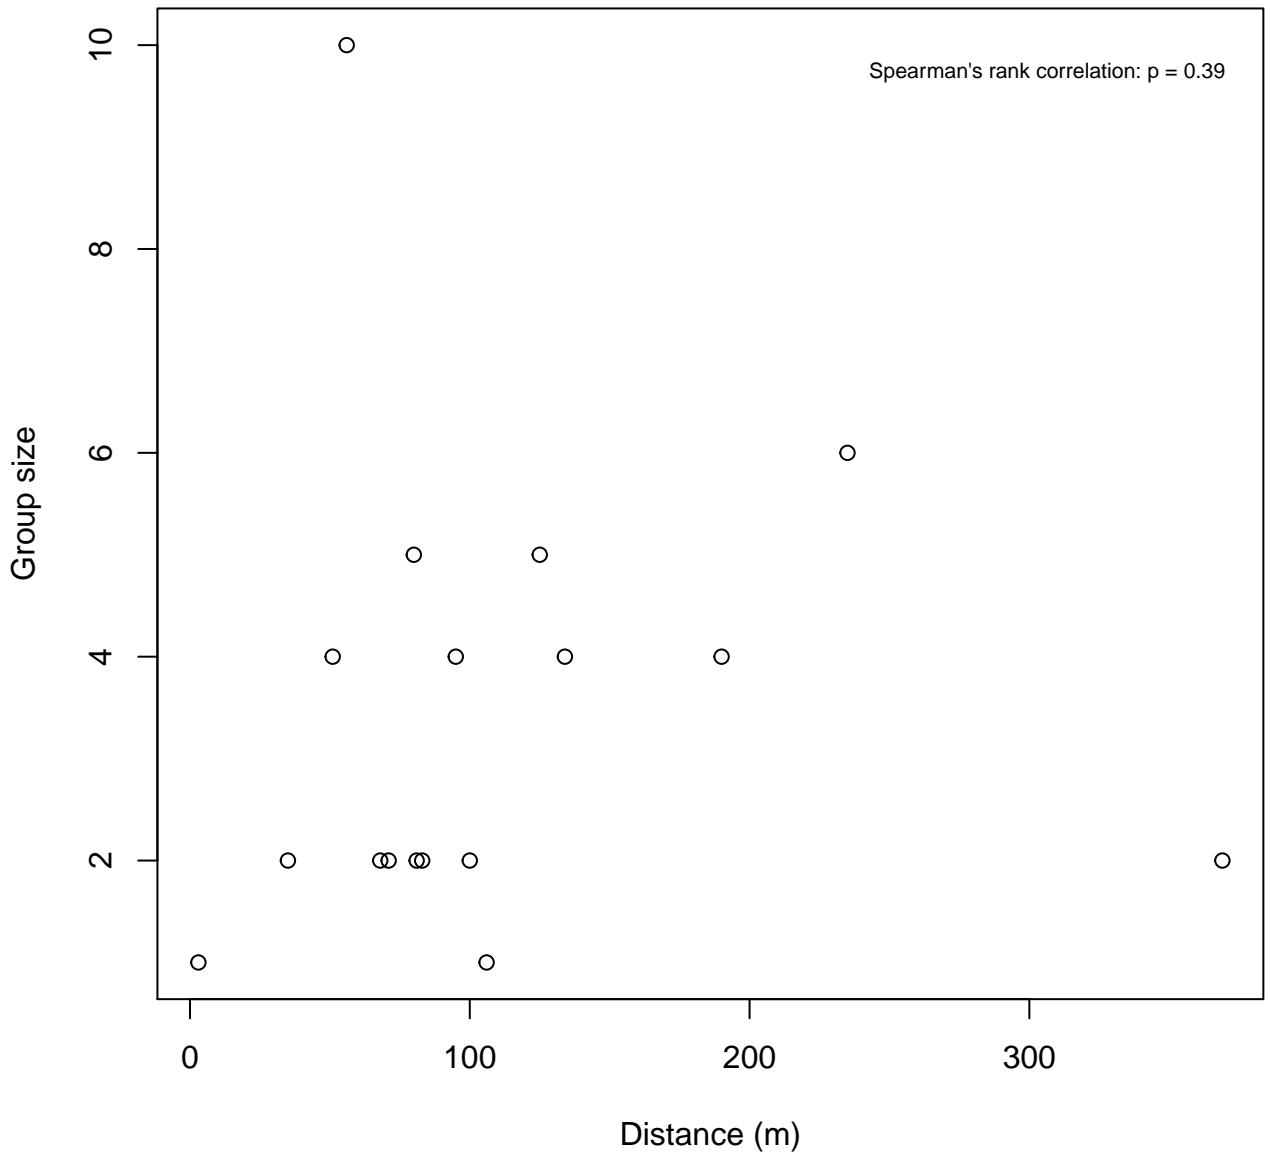

*Diopsittaca cumanensis* – Beni savanna – Bolivia (N = 17, key function = hn)

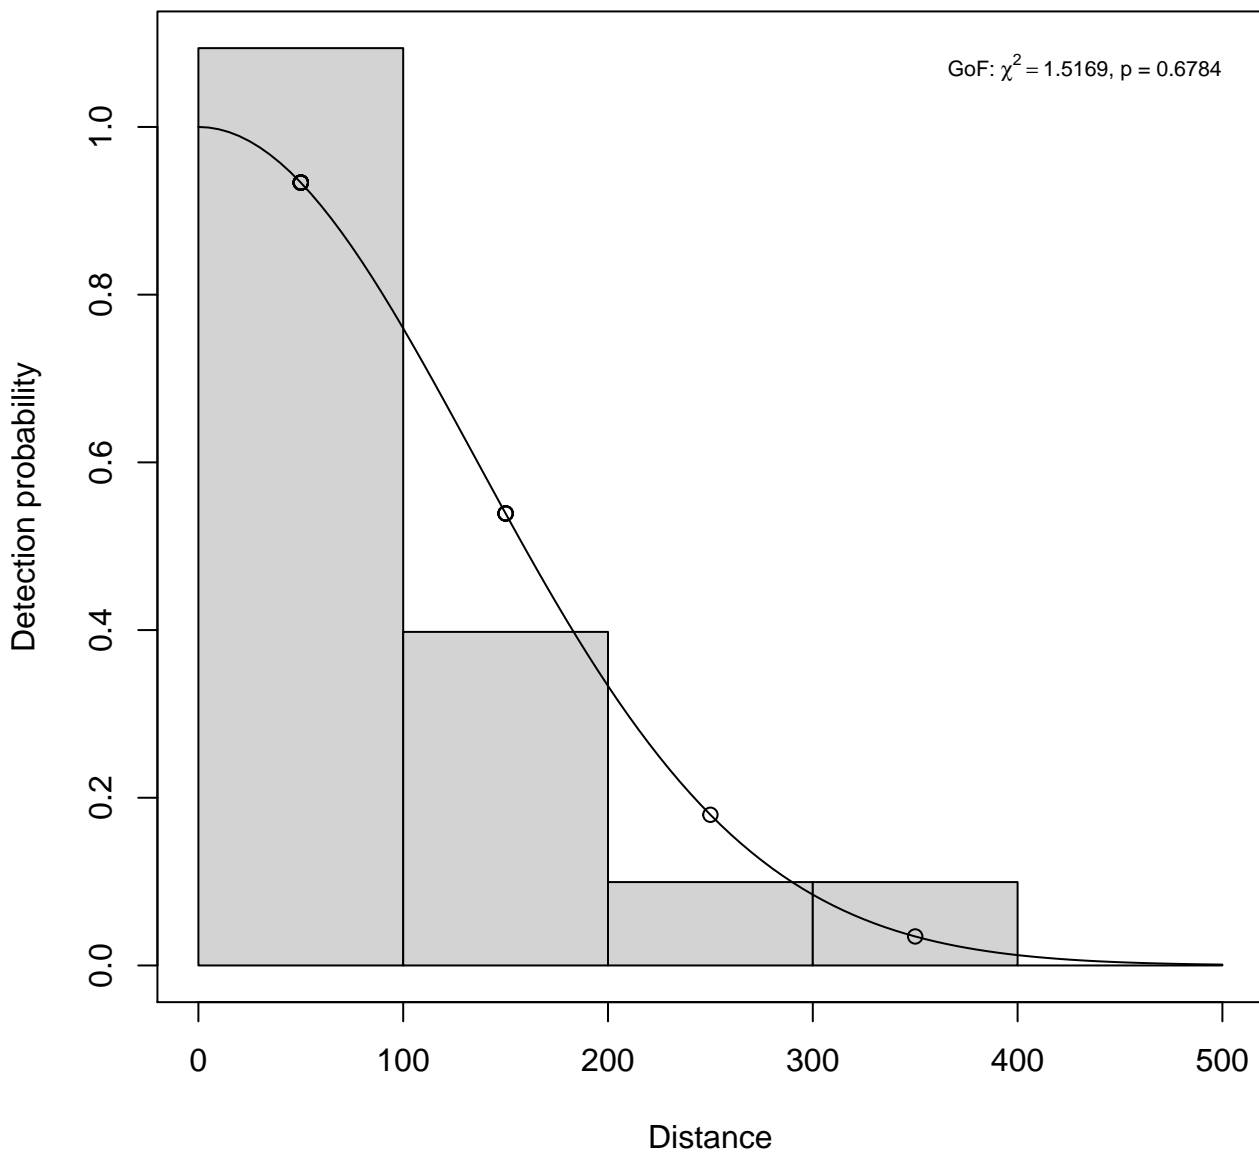

*Diopsittaca cumanensis* – Beni savanna – Bolivia (N = 17, key function = hn)

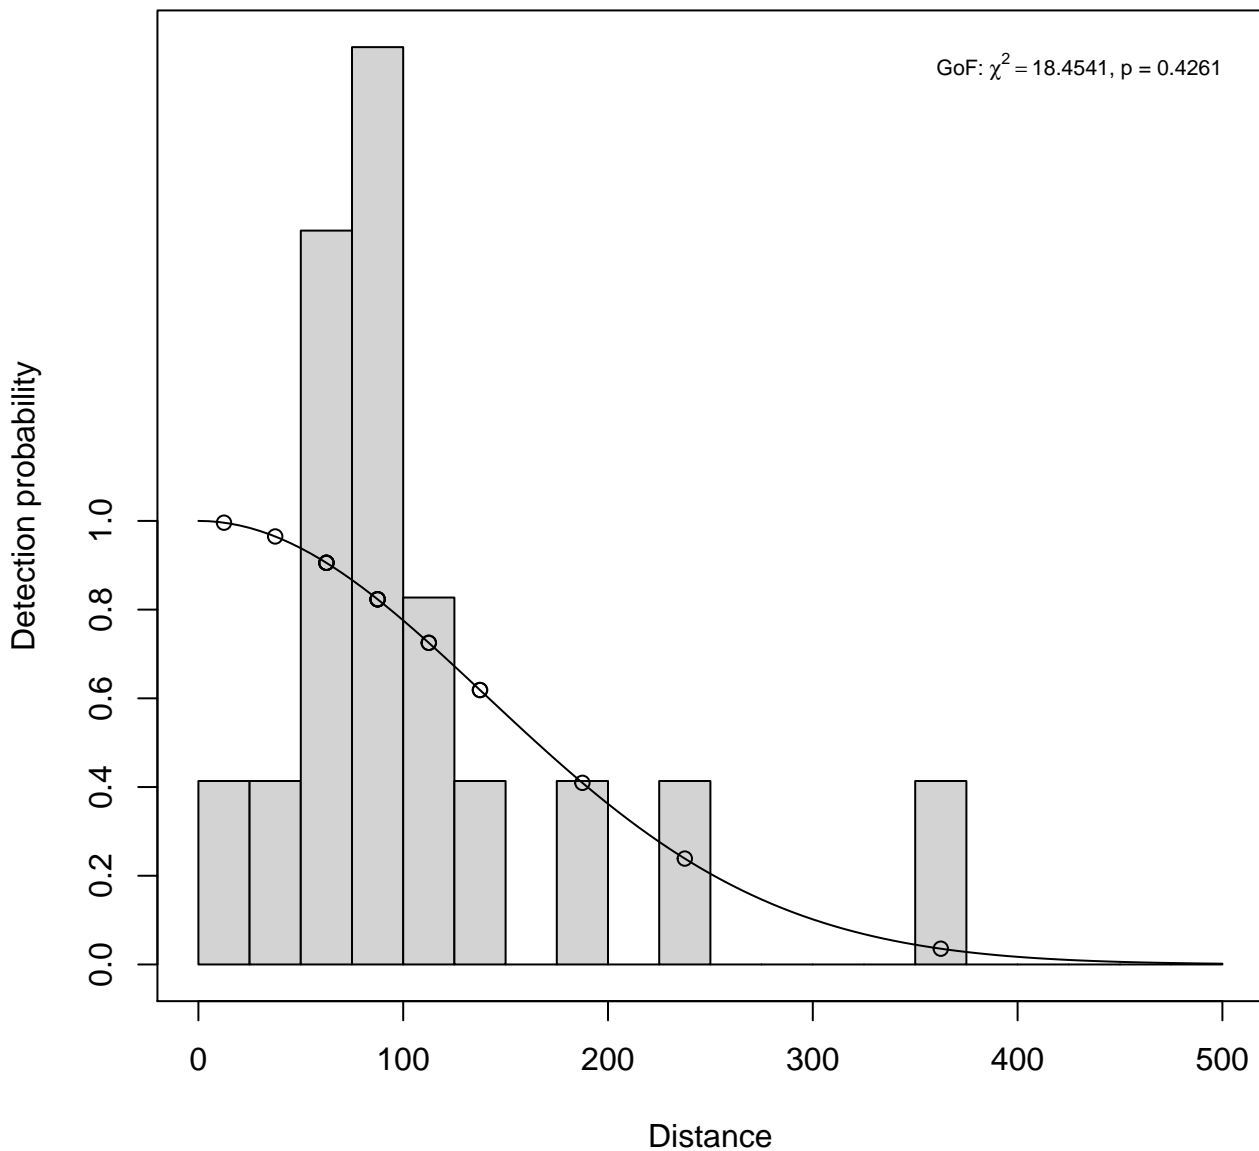

*Diopsittaca cumanensis* – Beni savanna – Bolivia (N = 17, key function = hr)

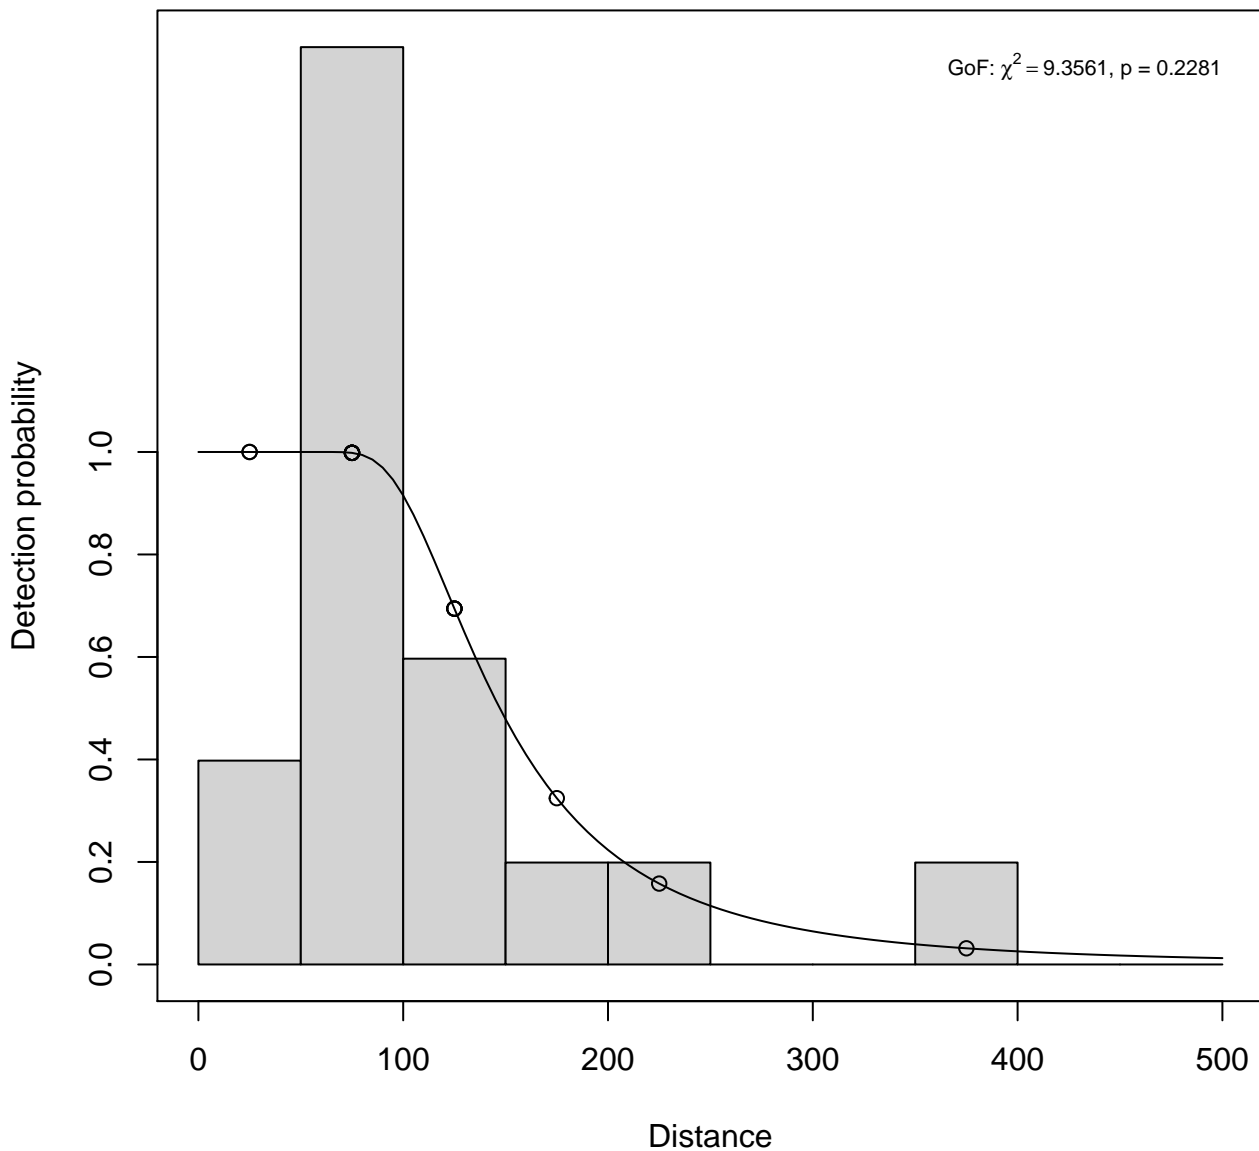

Supplement: s1 [file s1]
