# Supplementary material
Source: MDPI journal article supplement (https://www.mdpi.com/1424-2818/13/7/300)

# **Ara ararauna – Sinu Valley dry forests – Colombia**

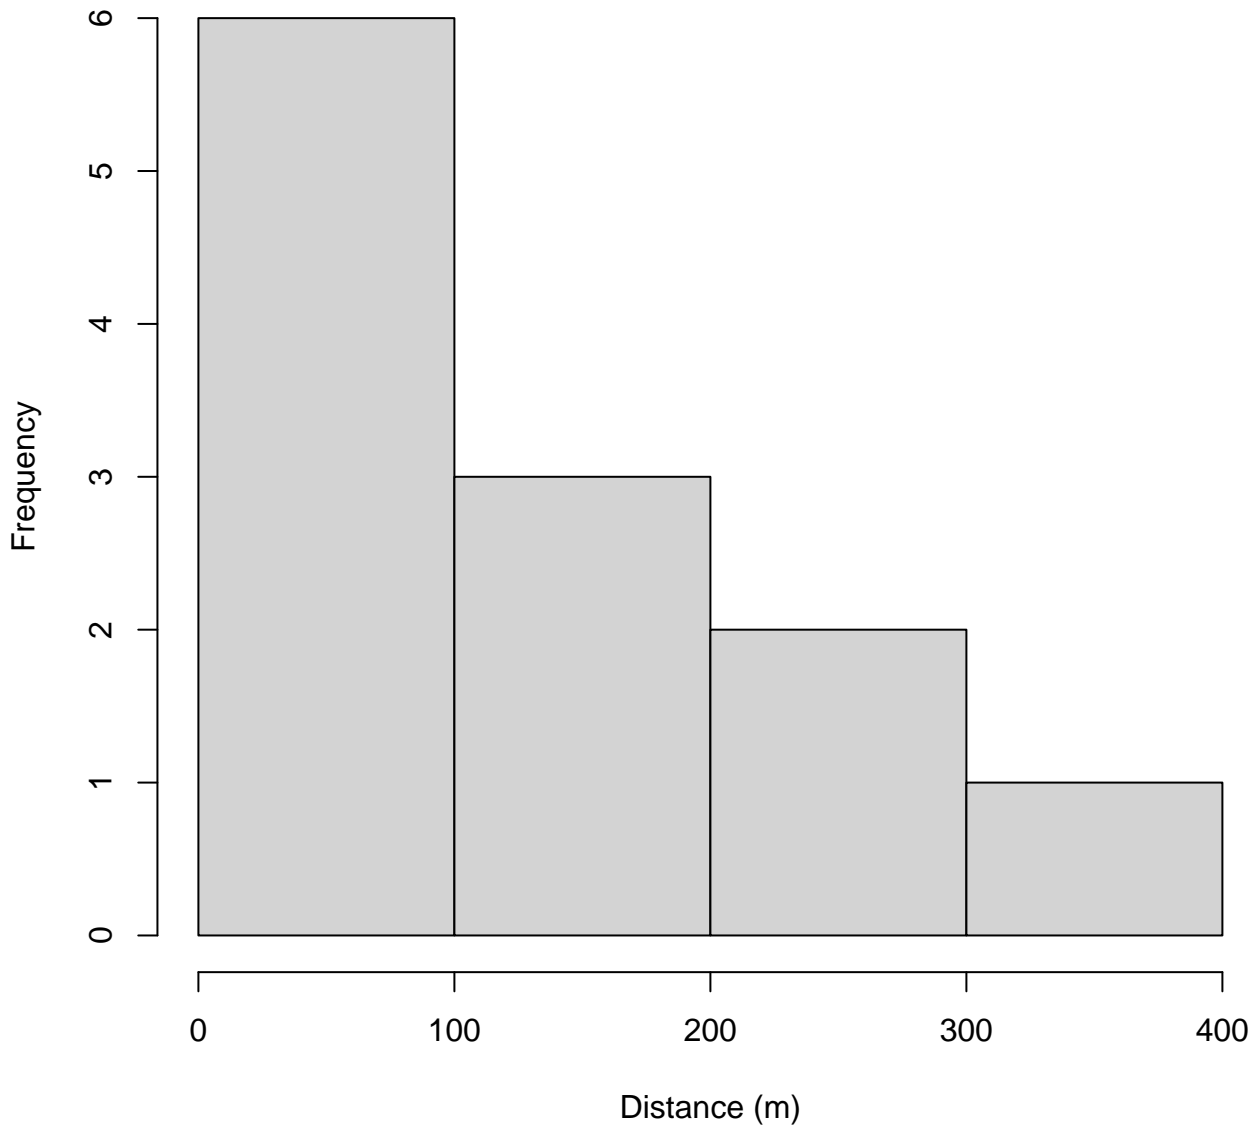

# Ara ararauna – Sinu Valley dry forests – Colombia

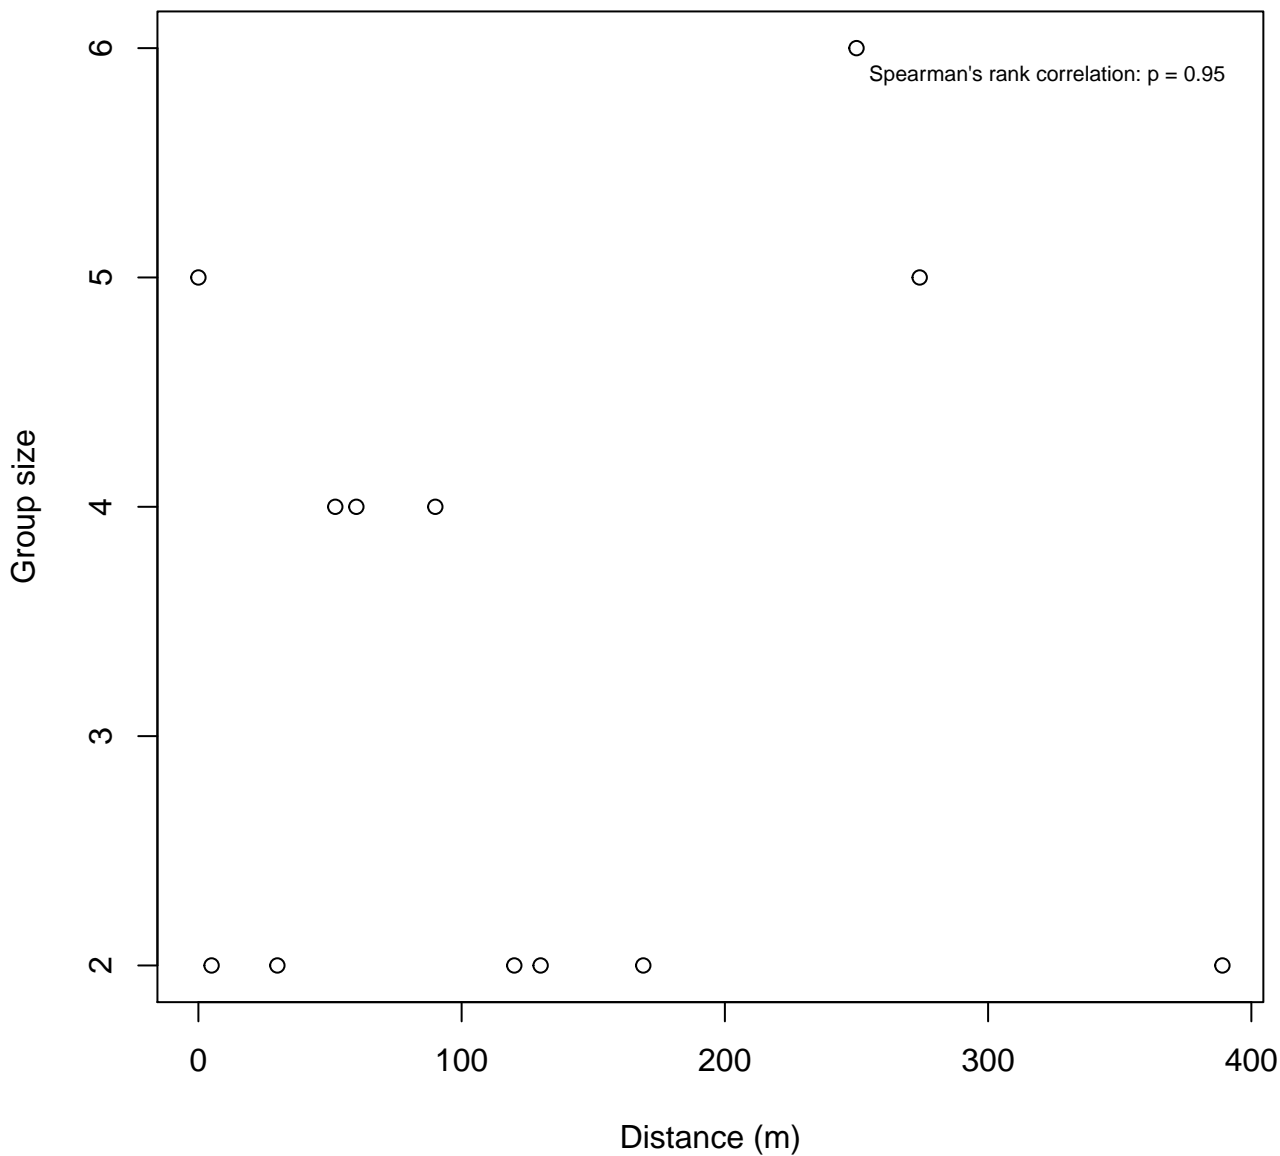

Ara ararauna – Sinu Valley dry forests – Colombia (N = 12, key function = hn)

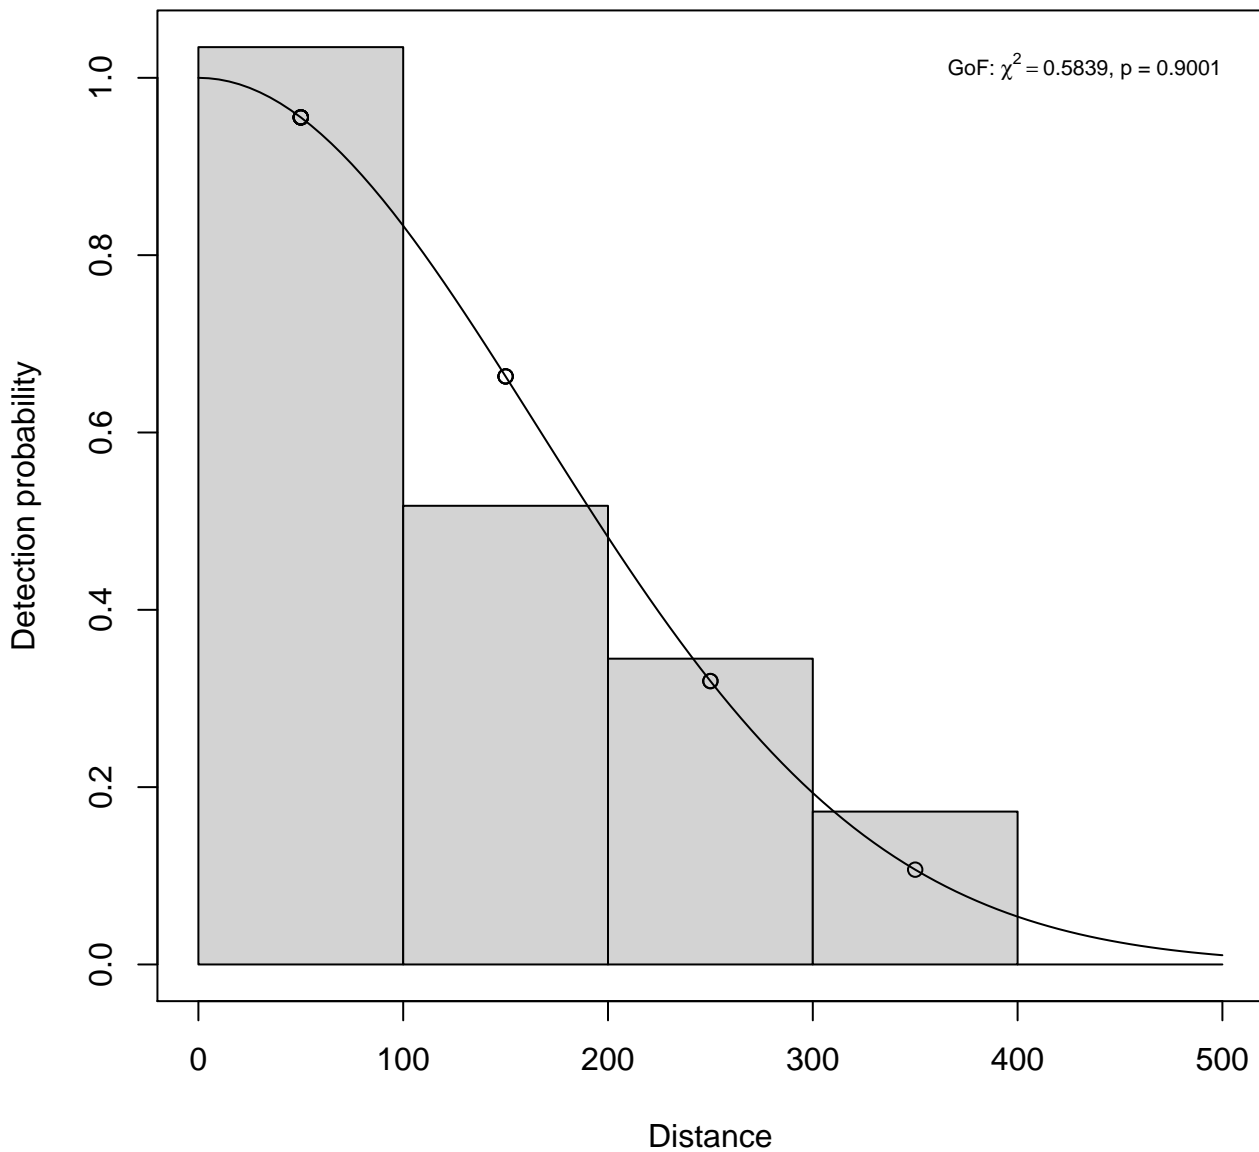

Ara ararauna – Sinu Valley dry forests – Colombia (N = 12, key function = hn)

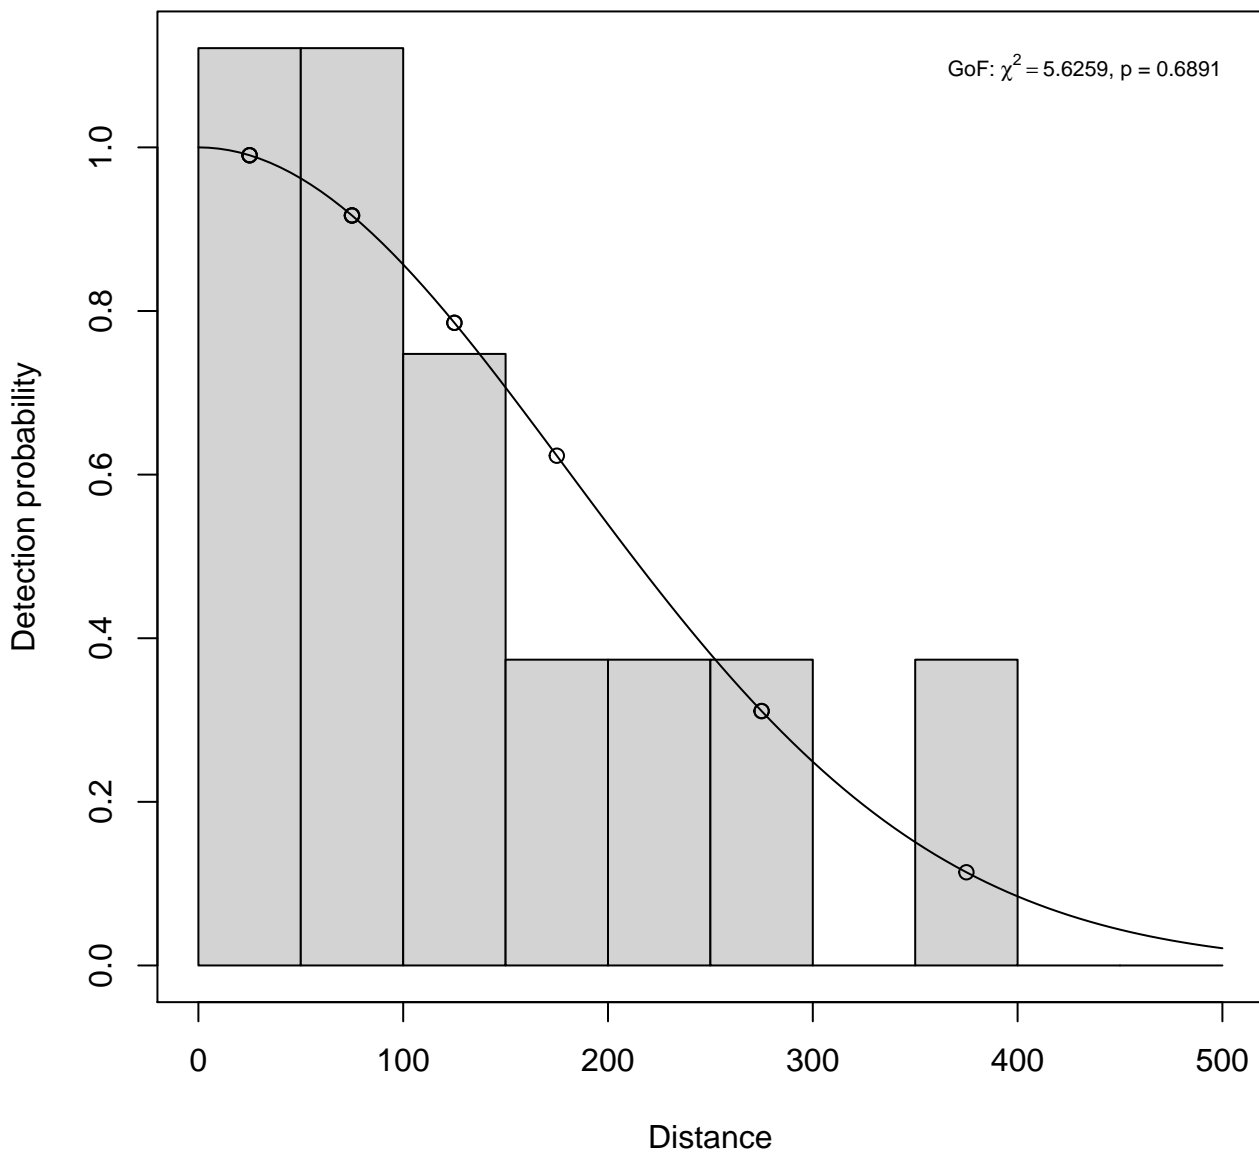

Ara ararauna – Sinu Valley dry forests – Colombia (N = 12, key function = hn)

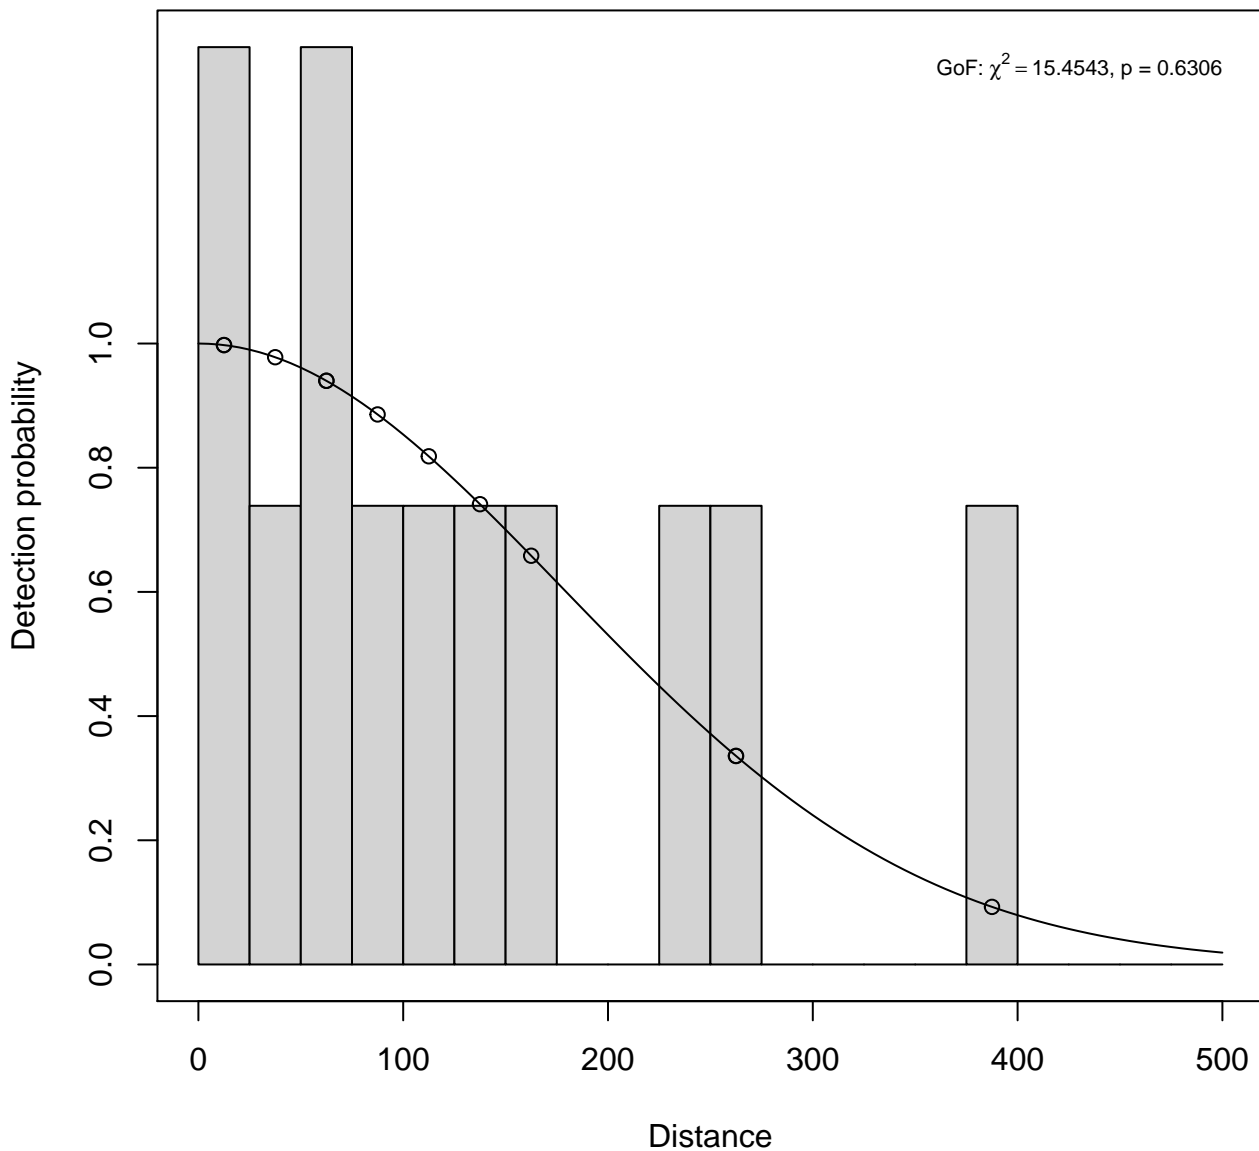

Supplement: s1 [file s1]
