# Supplementary material
Source: MDPI journal article supplement (https://www.mdpi.com/1424-2818/13/7/300)

# Primolius auricollis – Pantanal – Bolivia

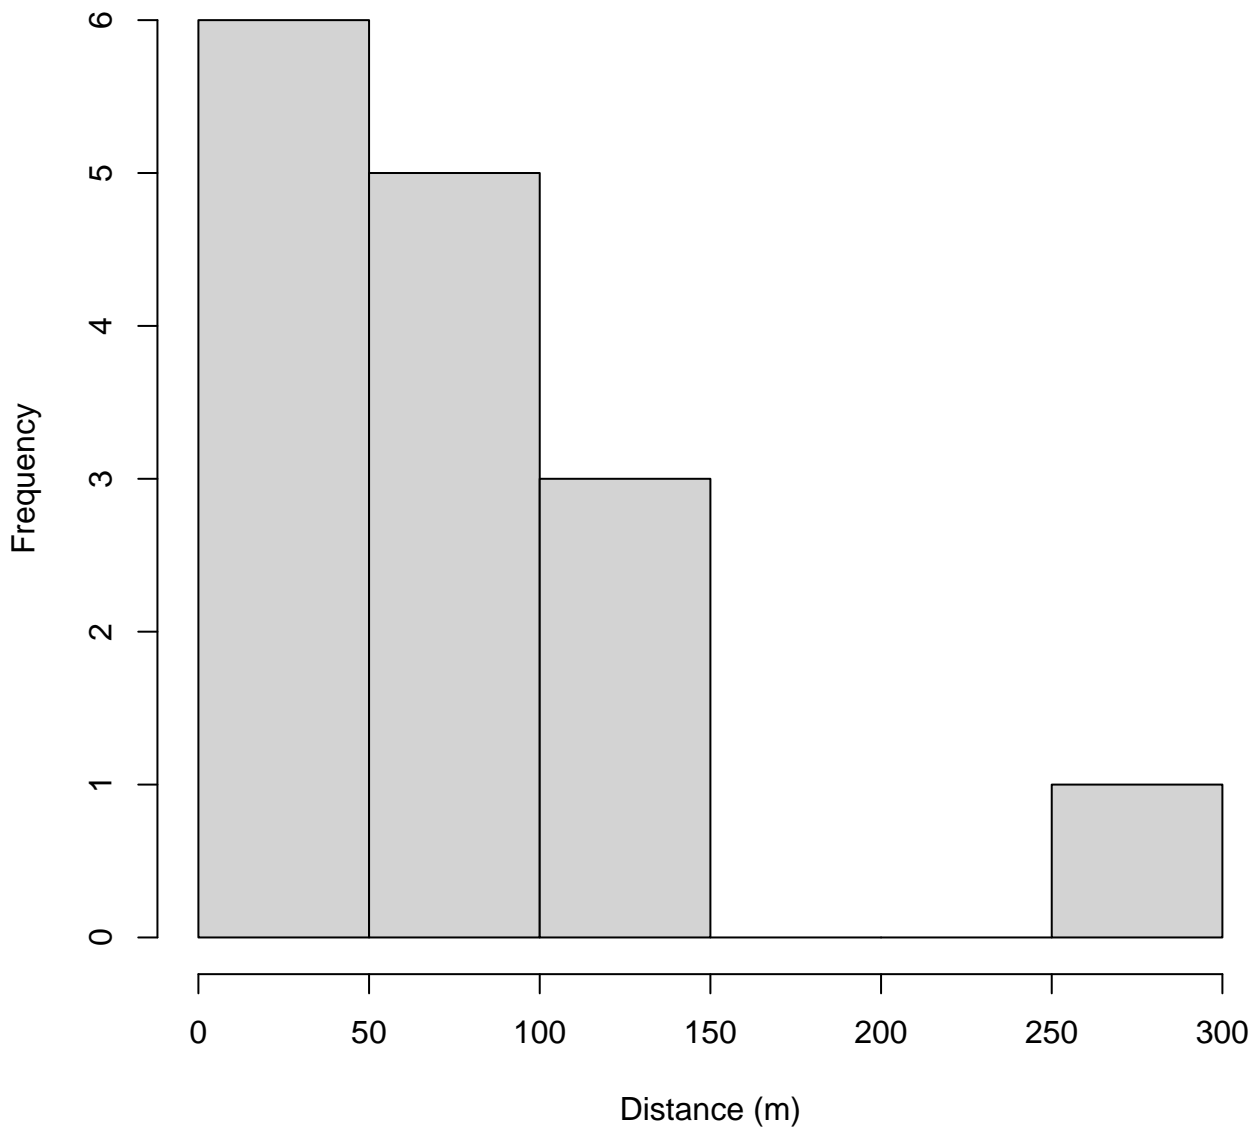

# Primolius auricollis – Pantanal – Bolivia

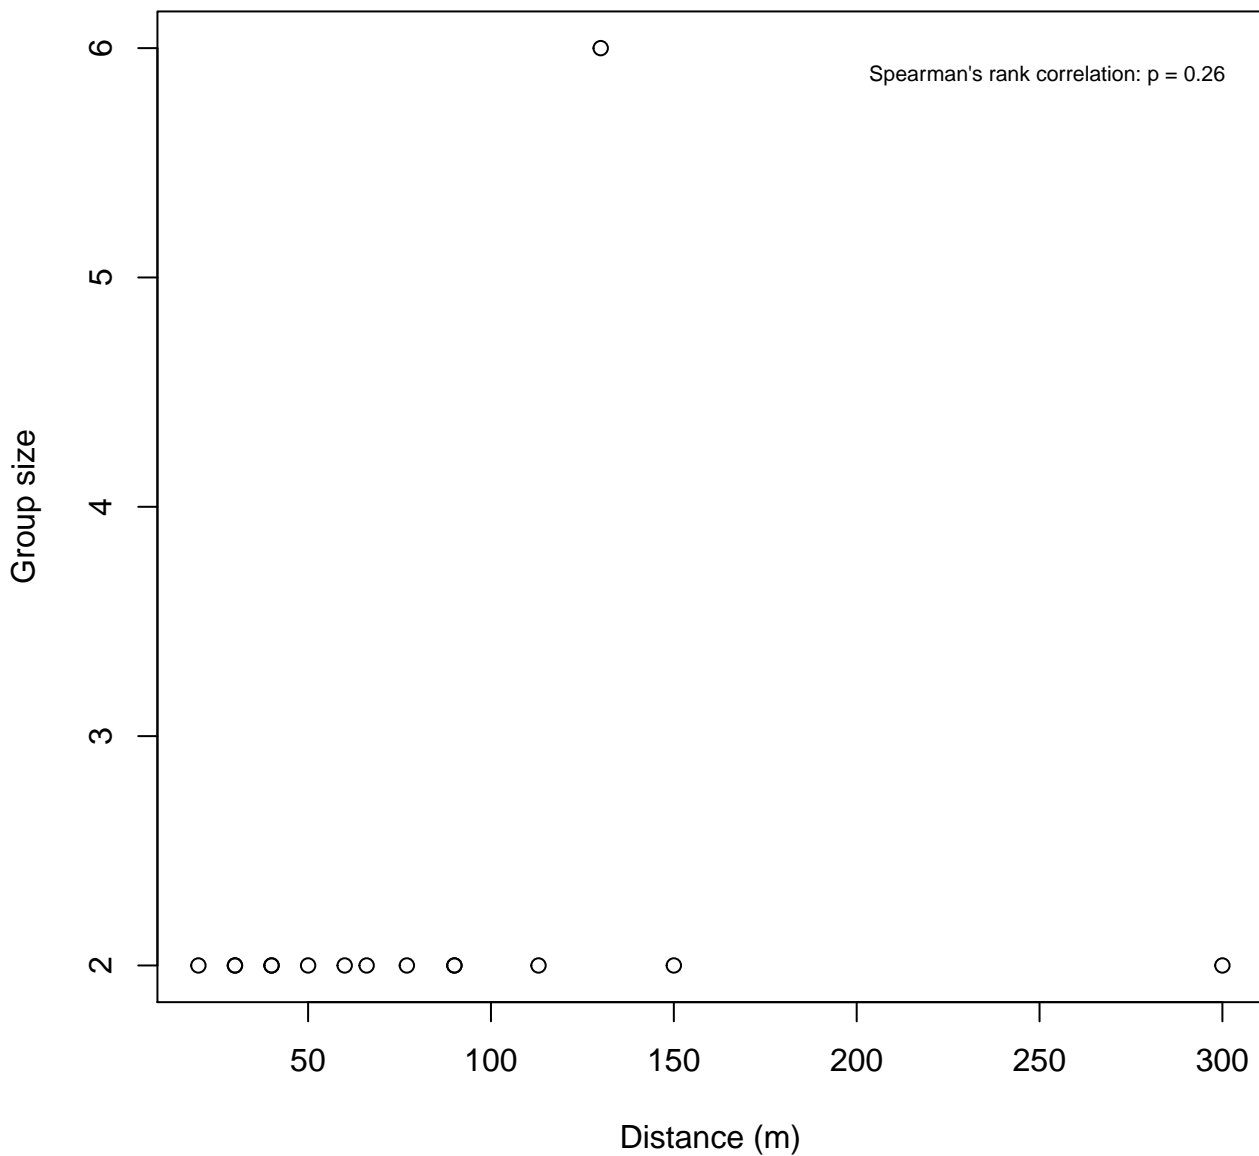

Primolius auricollis – Pantanal – Bolivia (N = 15, key function = hn)

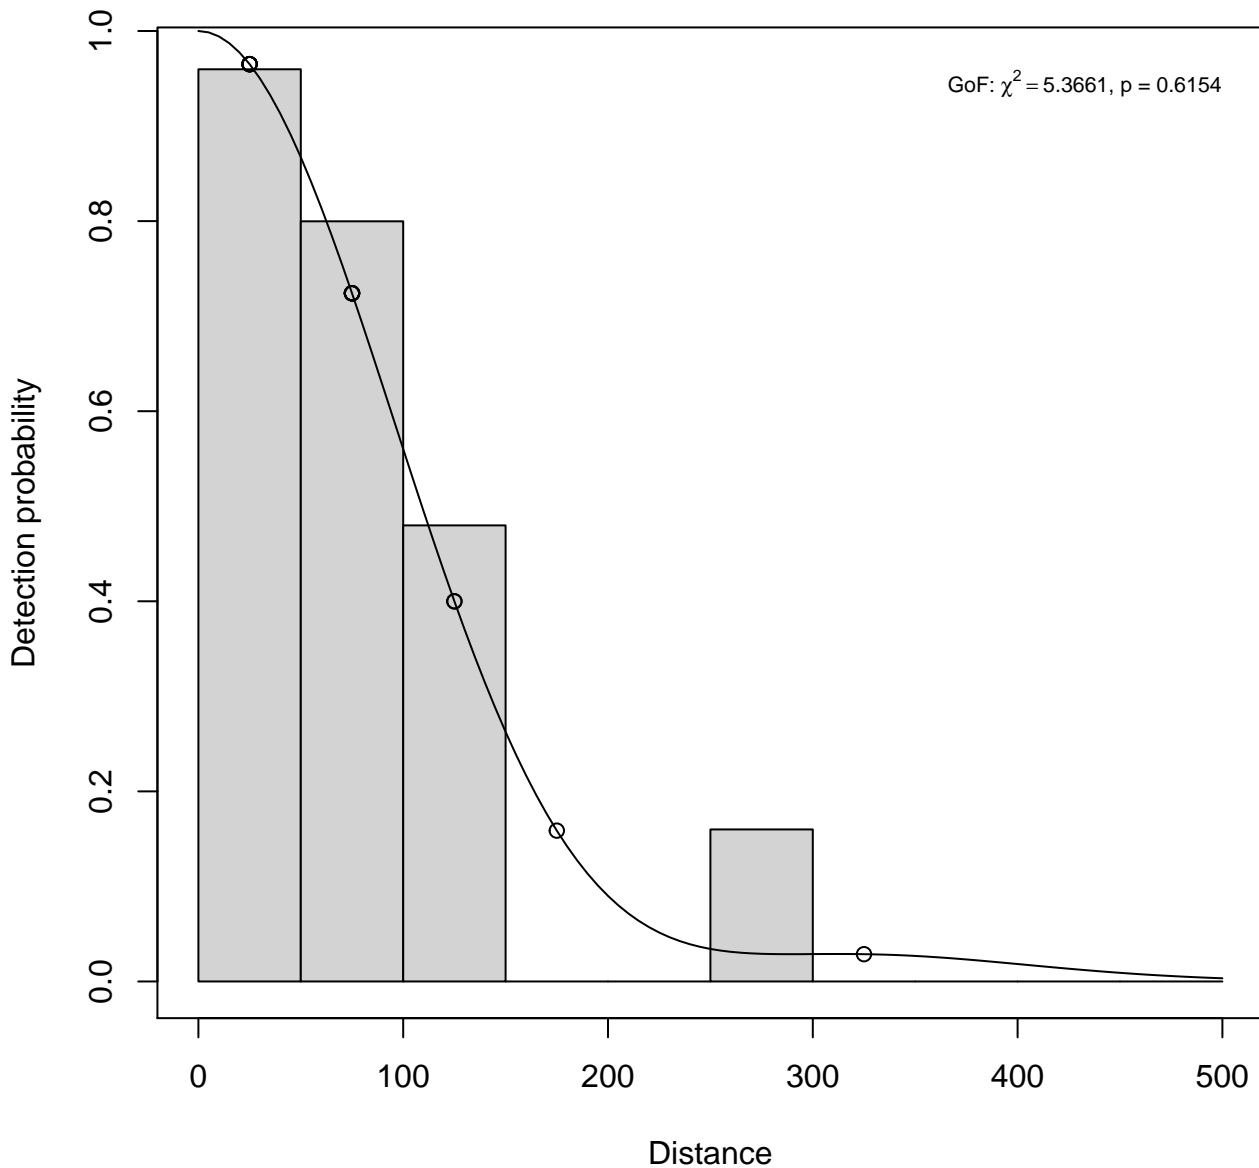

Primolius auricollis – Pantanal – Bolivia (N = 15, key function = hn)

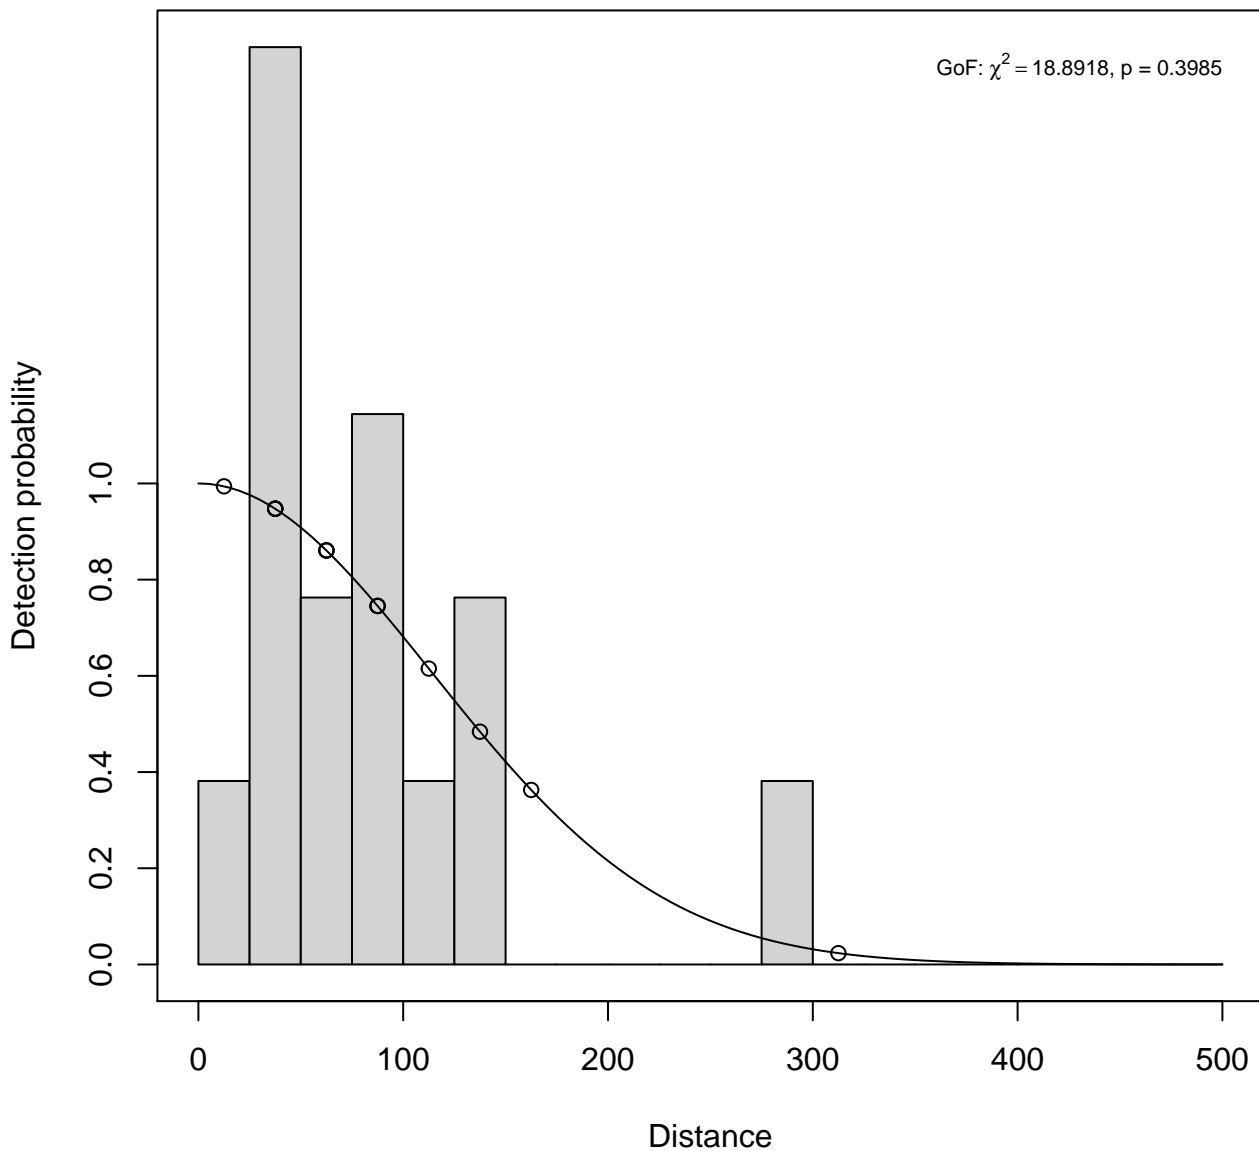

Primolius auricollis – Pantanal – Bolivia (N = 15, key function = hn)

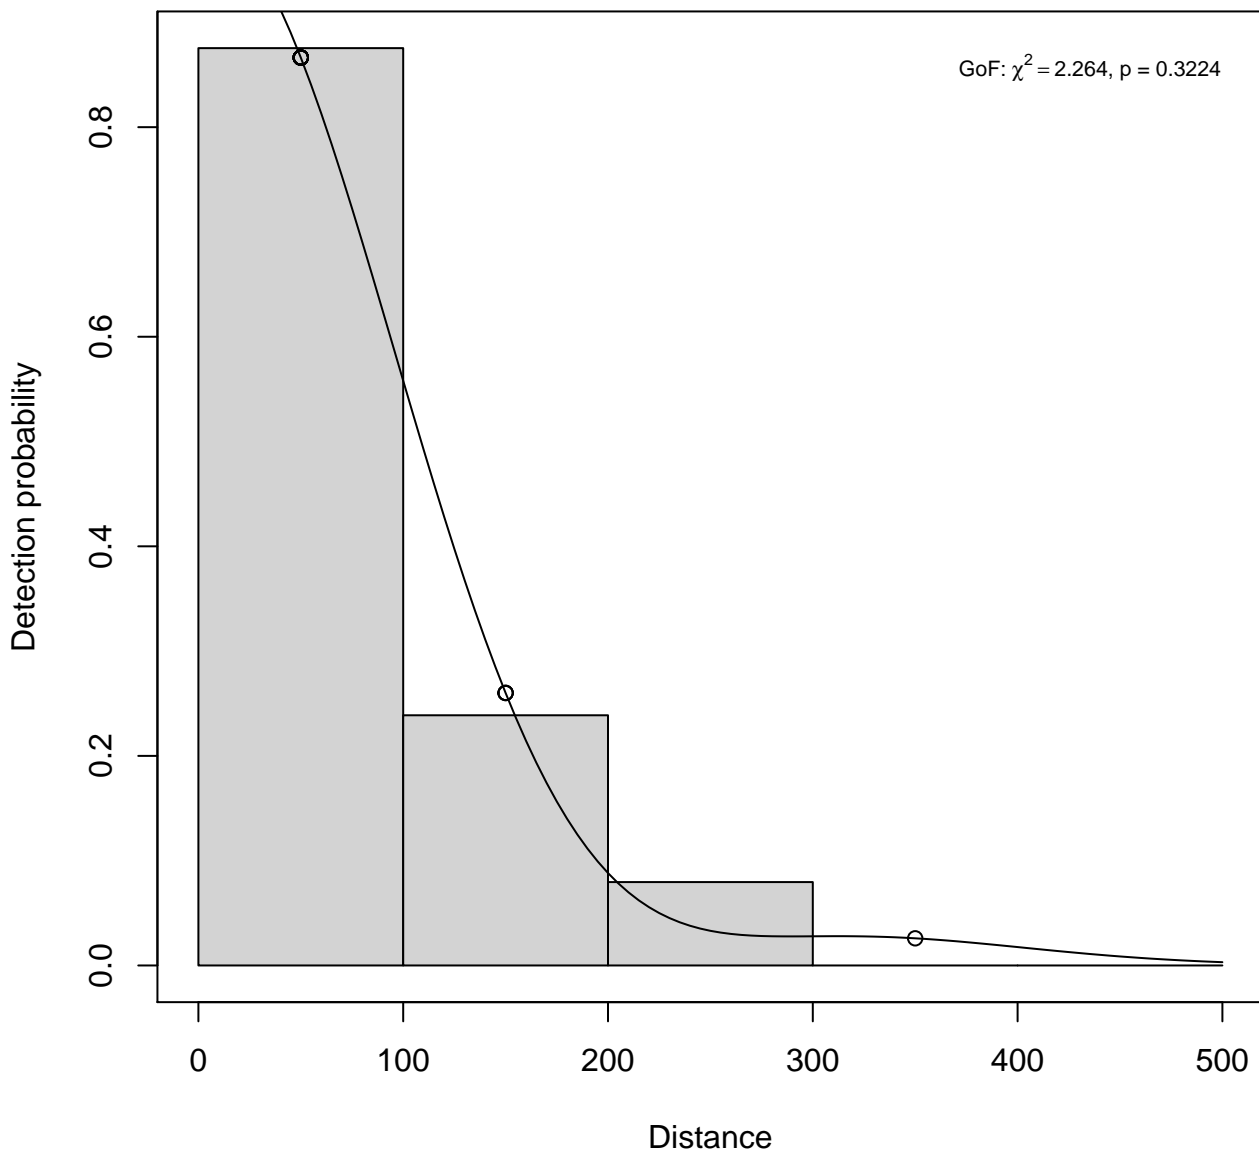

Supplement: s1 [file s1]
