# Supplementary material
Source: MDPI journal article supplement (https://www.mdpi.com/1424-2818/13/7/300)

# Brotogeris chiriri – Cerrado – Brazil

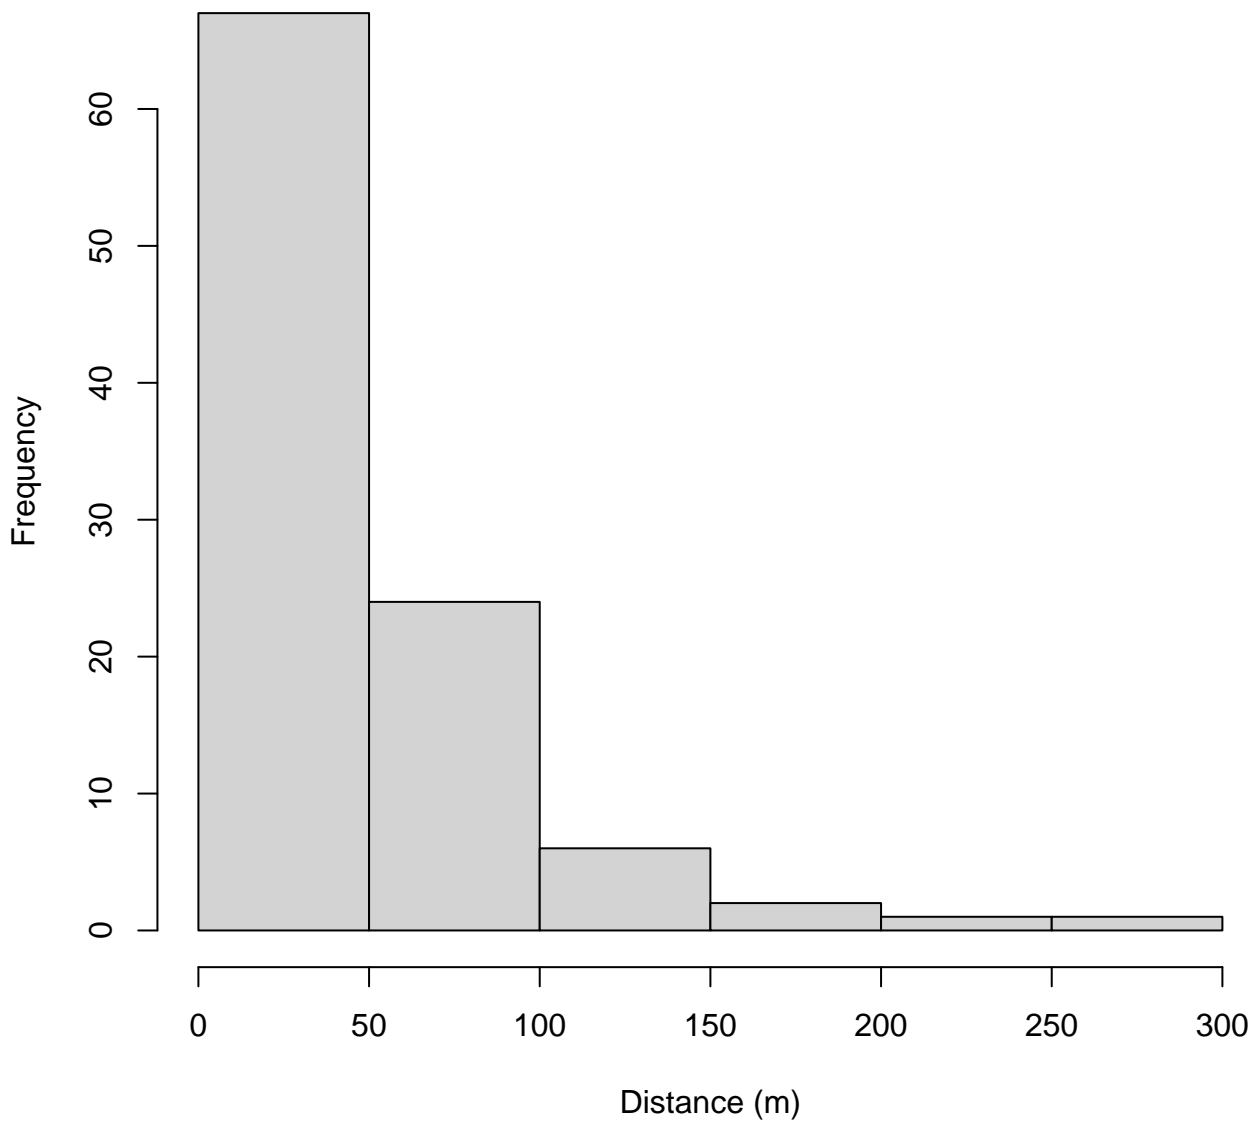

# Brotoyeris chiriri – Cerrado – Brazil

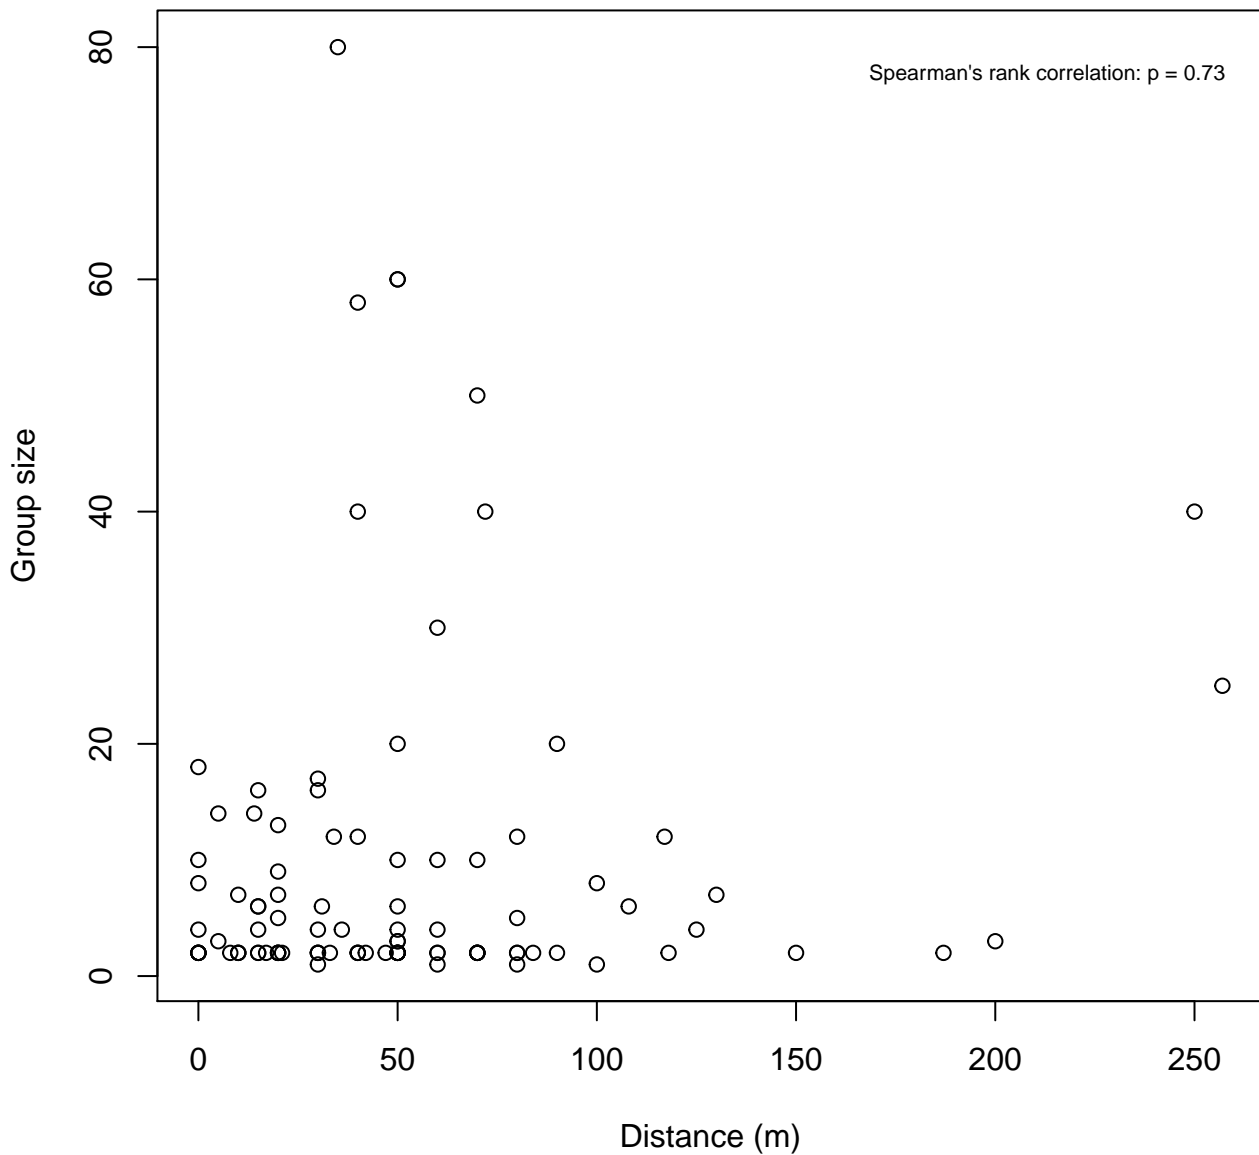

Brotogeris chiriri – Cerrado – Brazil (N = 101, key function = hr)

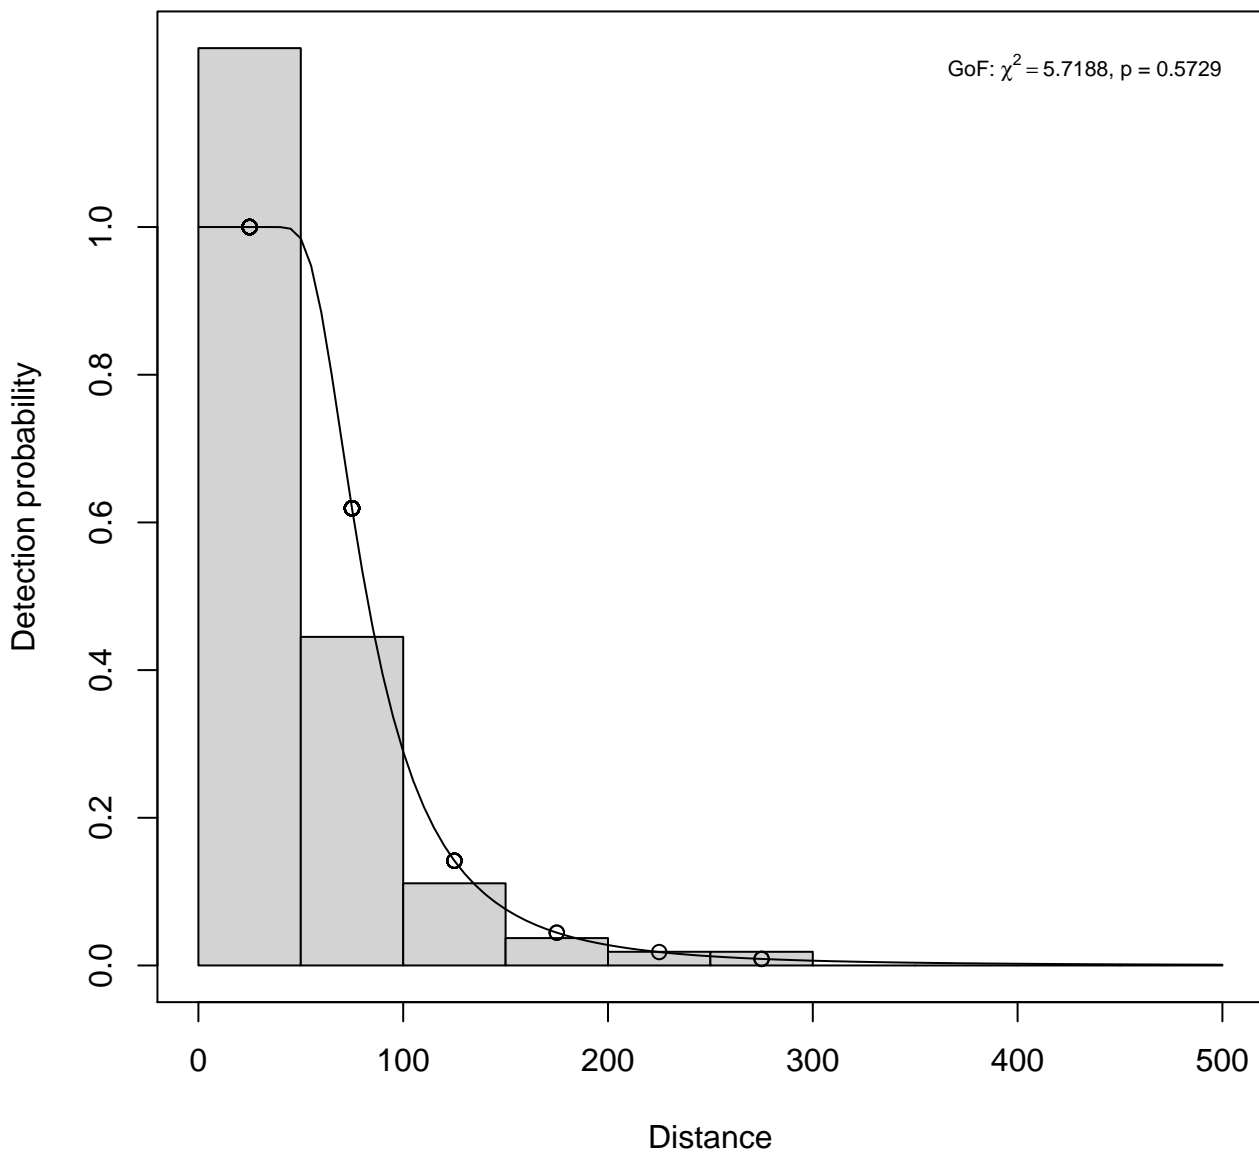

Brotogeris chiriri – Cerrado – Brazil (N = 101, key function = hr)

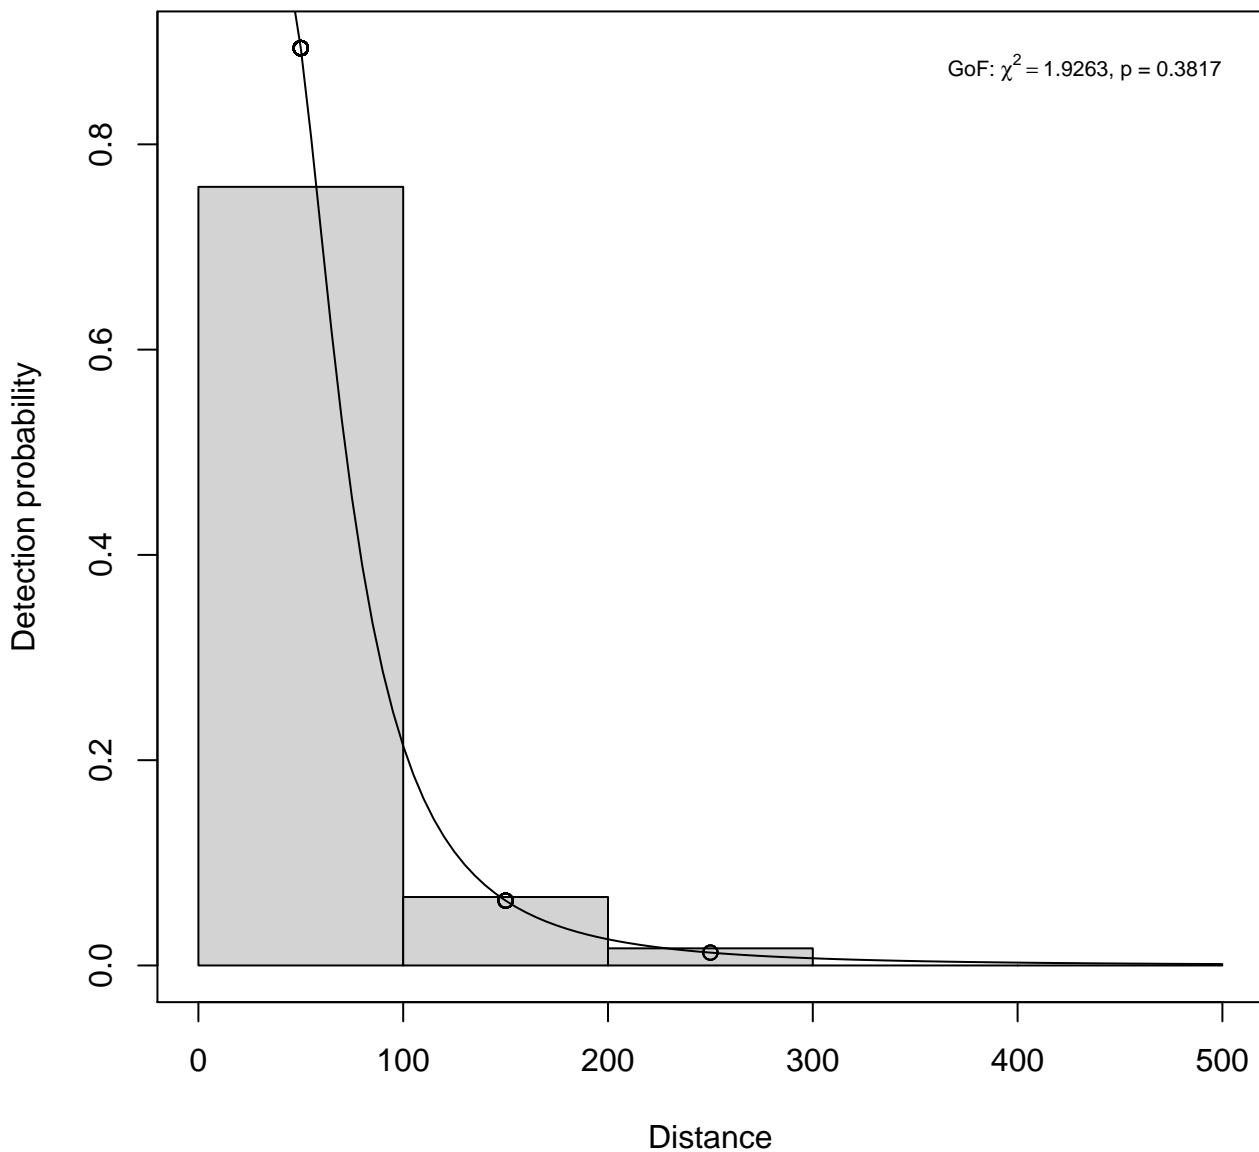

Brotogeris chiriri – Cerrado – Brazil (N = 101, key function = hr)

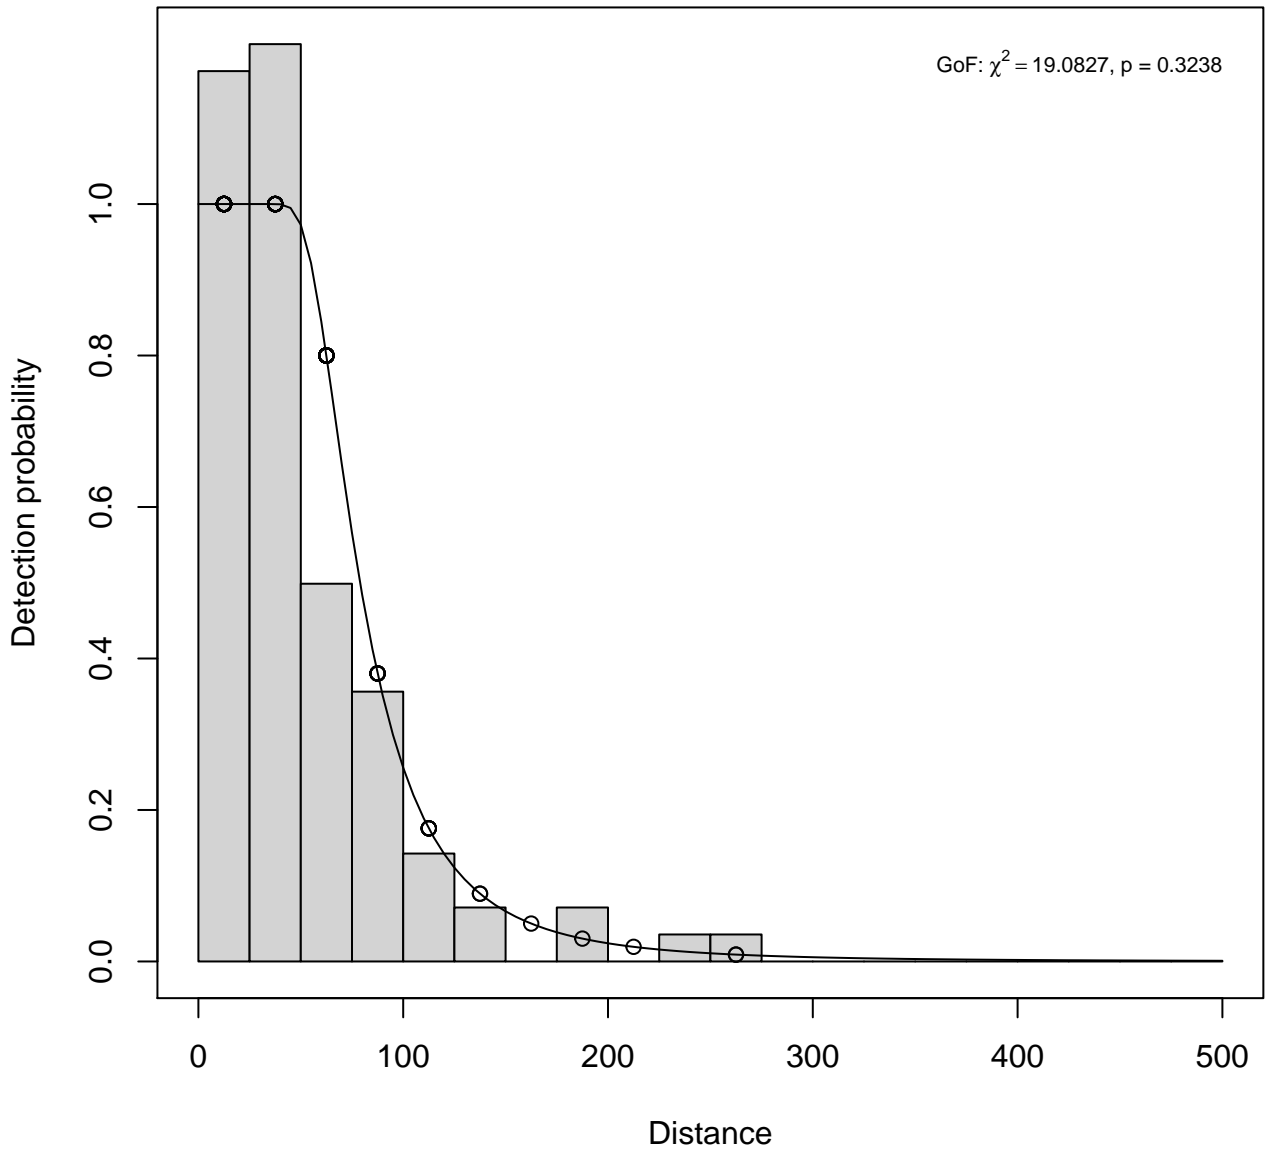

Supplement: s1 [file s1]
