# Supplementary material
Source: MDPI journal article supplement (https://www.mdpi.com/1424-2818/13/7/300)

# Amazona amazonica – Beni savanna – Bolivia

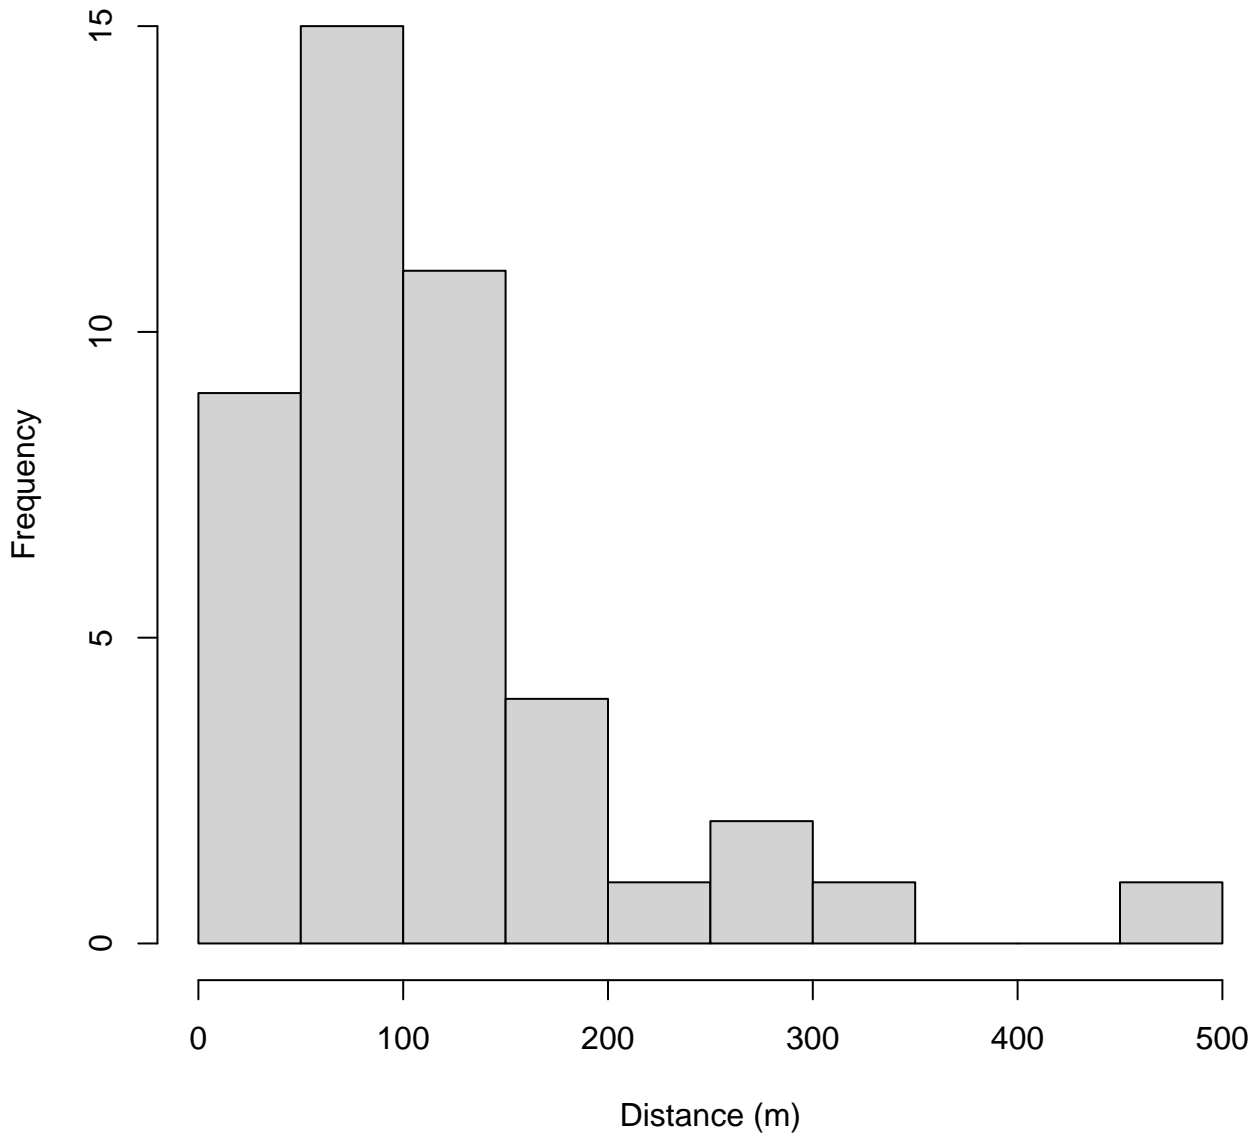

# Amazona amazonica – Beni savanna – Bolivia

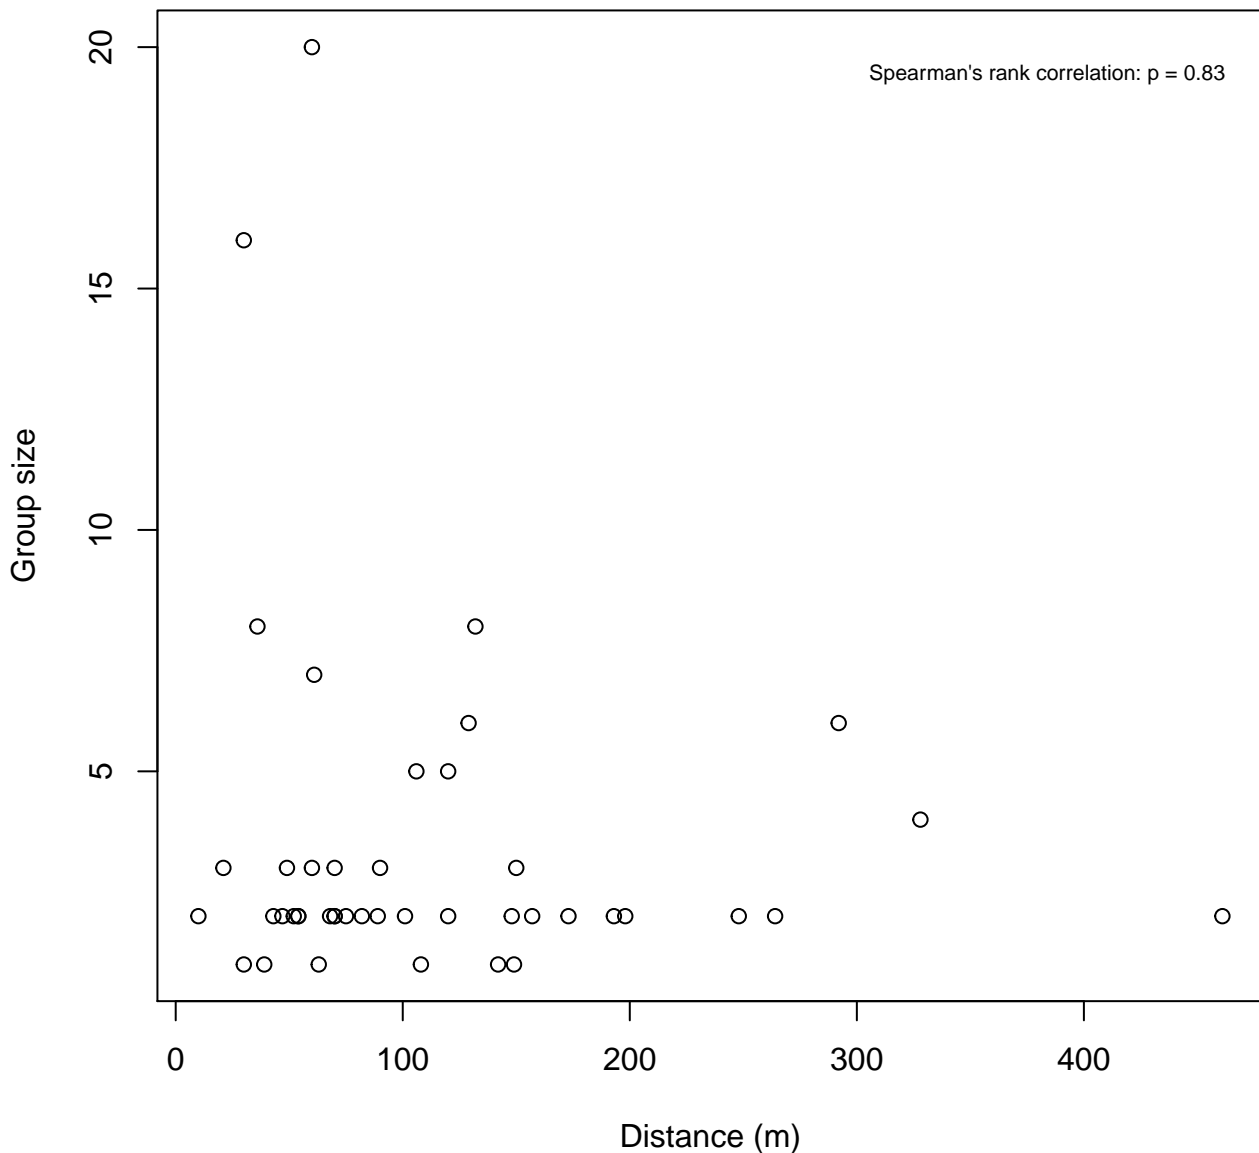

Amazona amazonica – Beni savanna – Bolivia (N = 44, key function = hr)

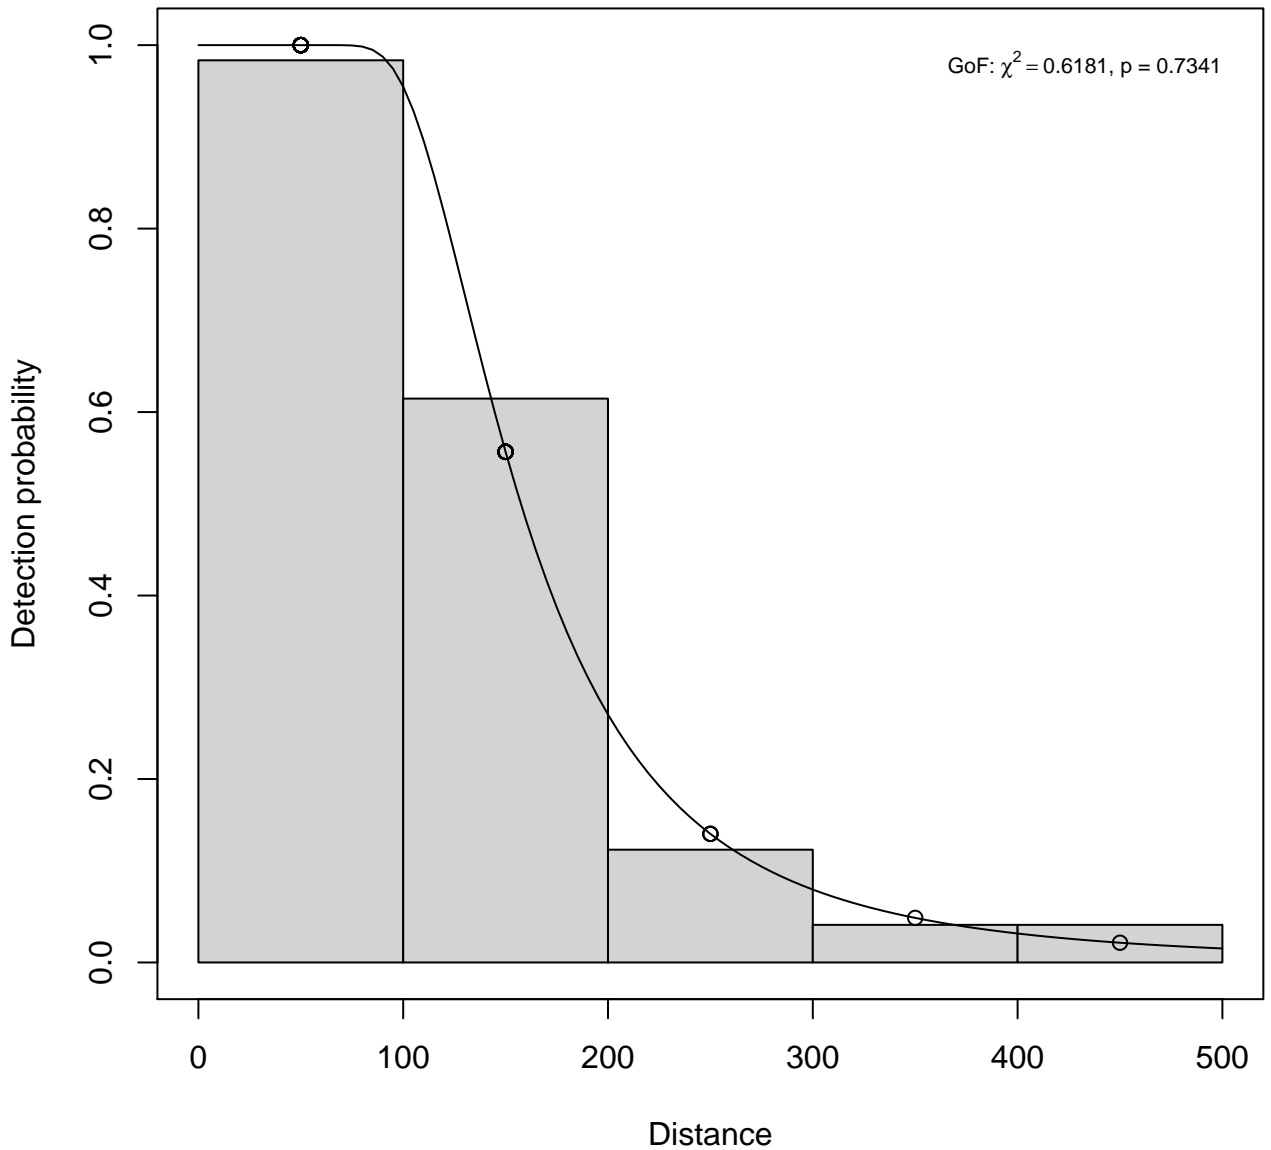

Amazona amazonica – Beni savanna – Bolivia (N = 44, key function = hr)

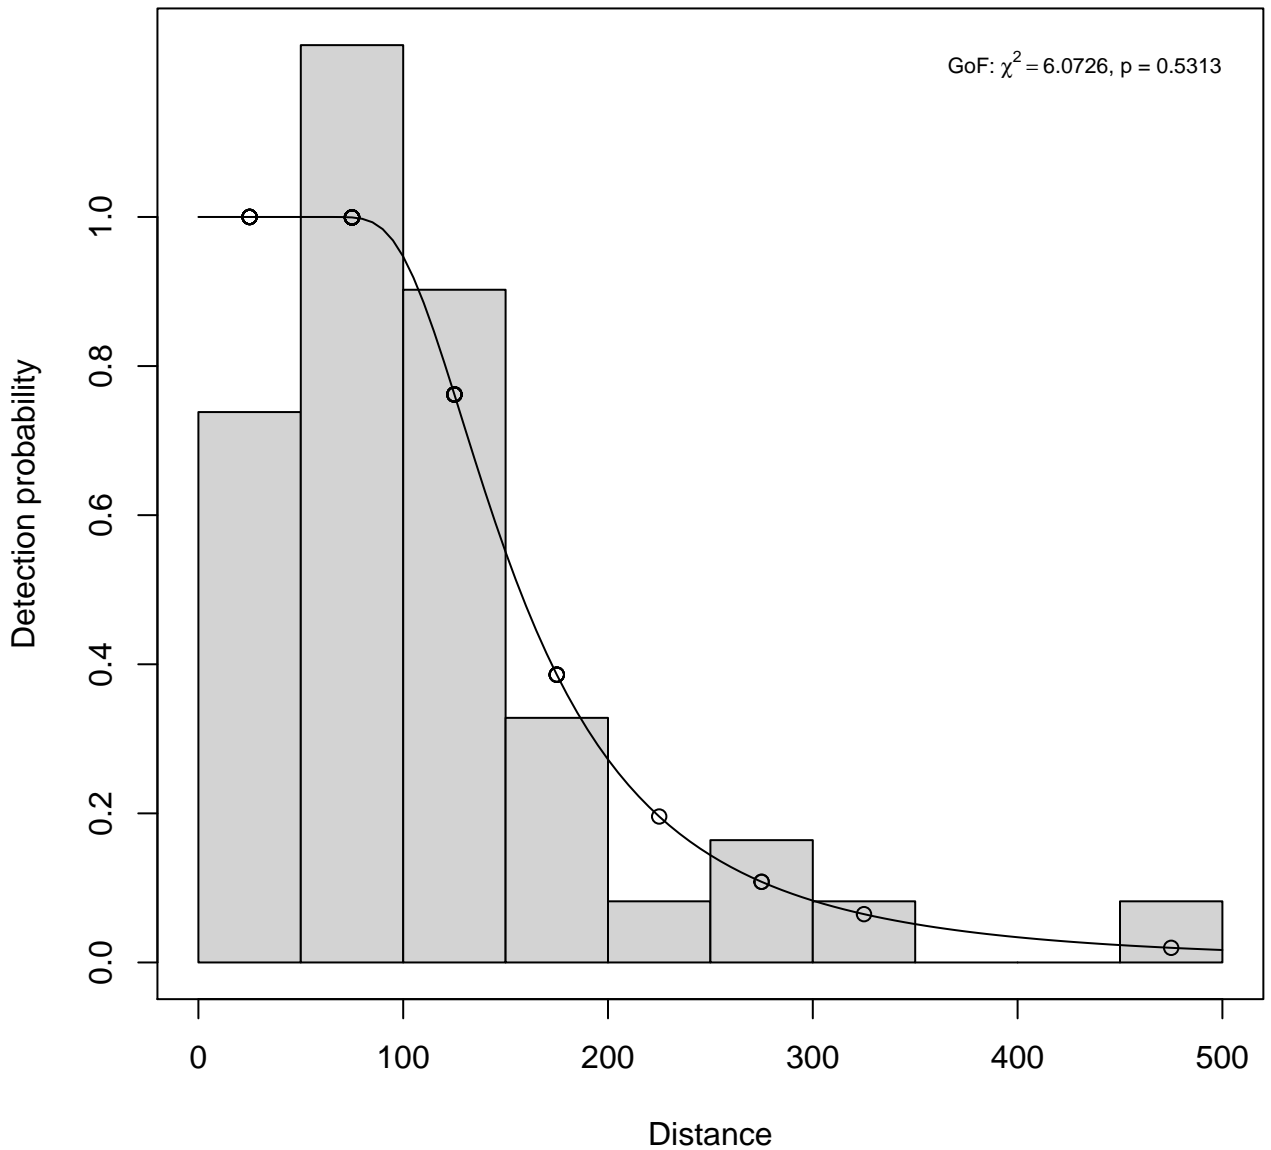

Amazona amazonica – Beni savanna – Bolivia (N = 44, key function = hr)

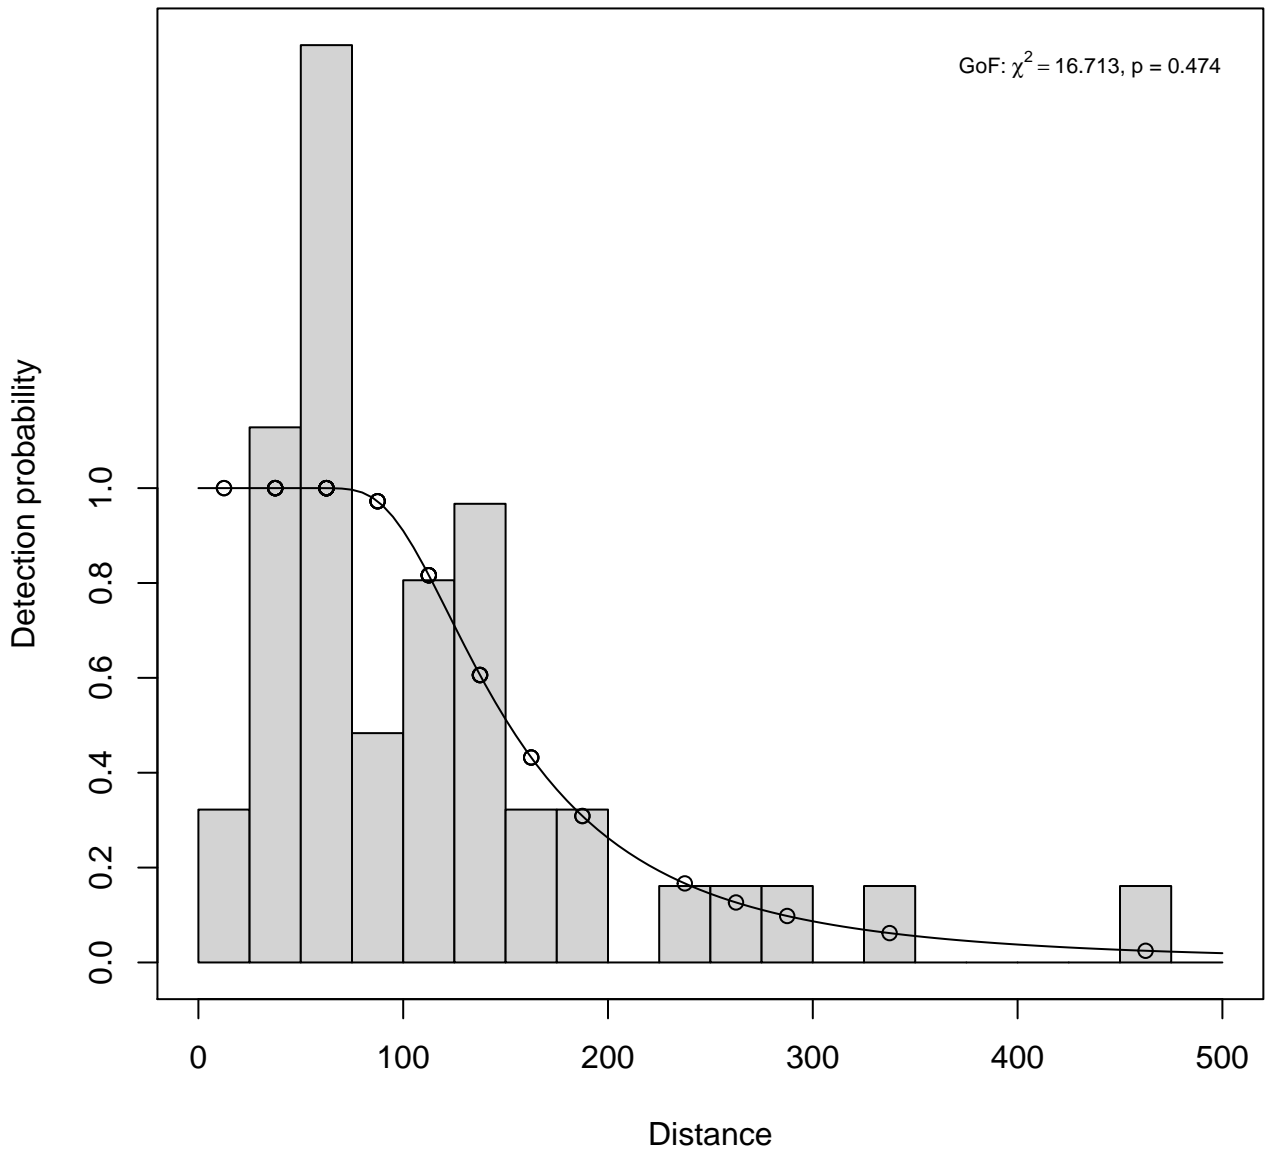

Supplement: s1 [file s1]
