# Supplementary material
Source: MDPI journal article supplement (https://www.mdpi.com/1424-2818/13/7/300)
Supplement: s1 [file s1]

## Appendix figures

The PDF files in this folder contain the distance sampling plot results for each species-ecoregion-country combination (i.e., case studies). Each PDF file has five plots (one per page):

Page 1. Histogram of detection distances;

Page 2. Plot of group size and detection distances; also showing the p-value for the Spearman rank correlation test.

Pages 3-5. Estimated detection functions from the best distance sampling model for each binning setup (i.e. 25m, 50m or 100m distance breaks), overlaid on the respective histogram of detection distances. The title of each plot informs the species-ecoregion-country combination (case study), the number of encounters and the key function of the DS model. Also included in the plot are the  $\chi^2$  goodness-of-fit (GoF) test results for each model. Finally, plots 3-5 are ordered according to their  $\chi^2$  GoF p-values, decreasingly, so that the DS model in plot 3 has the highest p-value and is the one selected for that species-ecoregion-country combination for subsequent analyses. A blank page indicates no model could be fitted for that binning setup.
