# Supplementary material
Source: MDPI journal article supplement (https://www.mdpi.com/1424-2818/13/7/300)

# Brotojeris chiriri – Chiquitano dry forests – Brazil

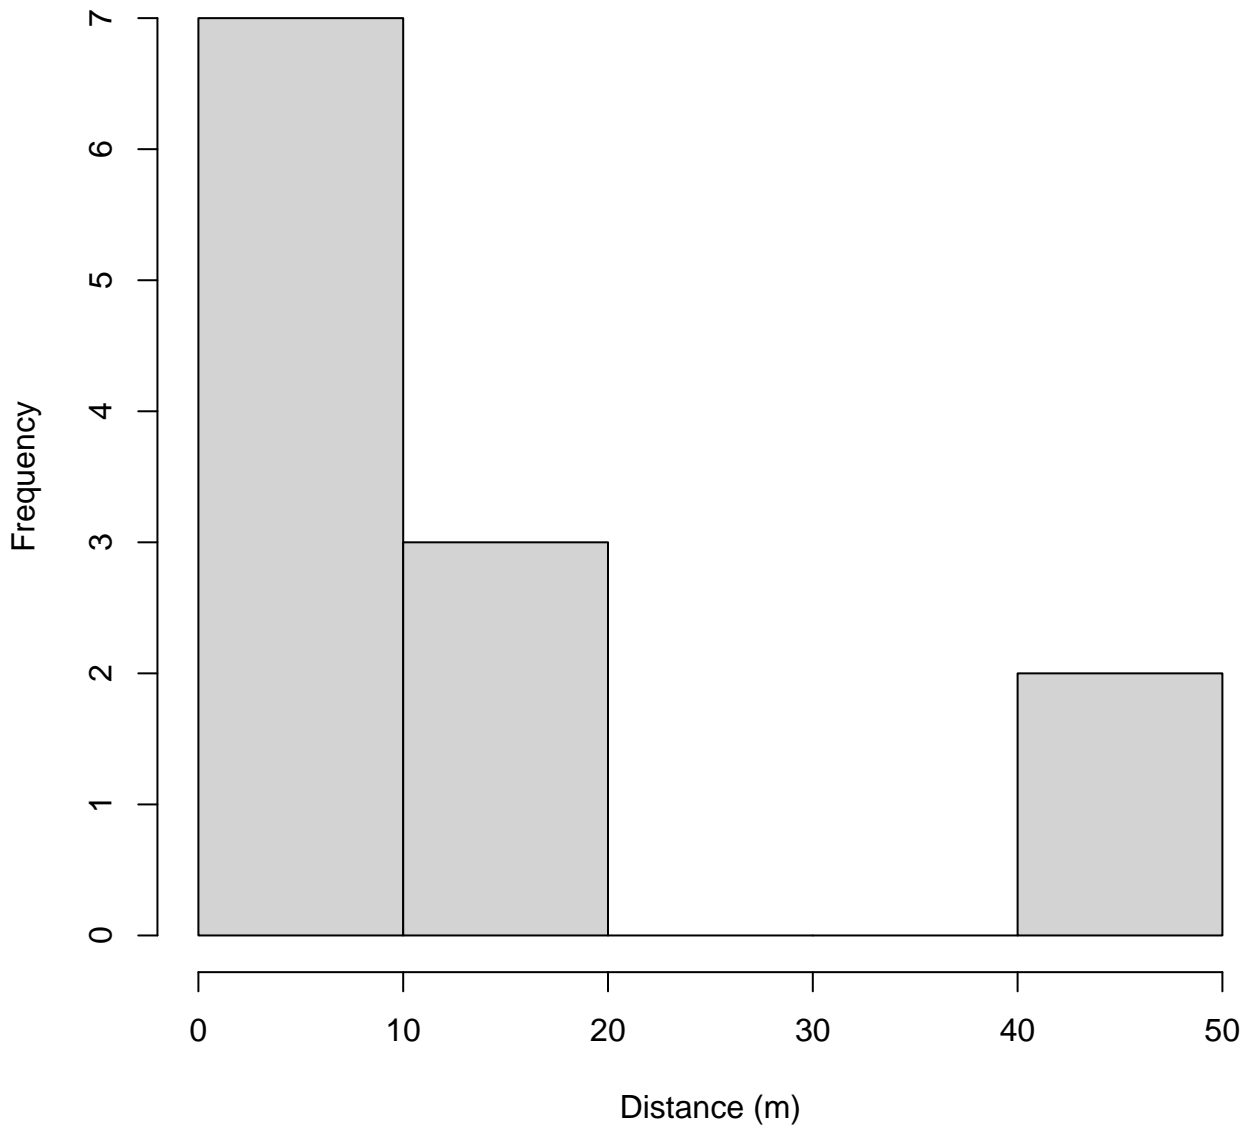

# Brotogetis chiriri – Chiquitano dry forests – Brazil

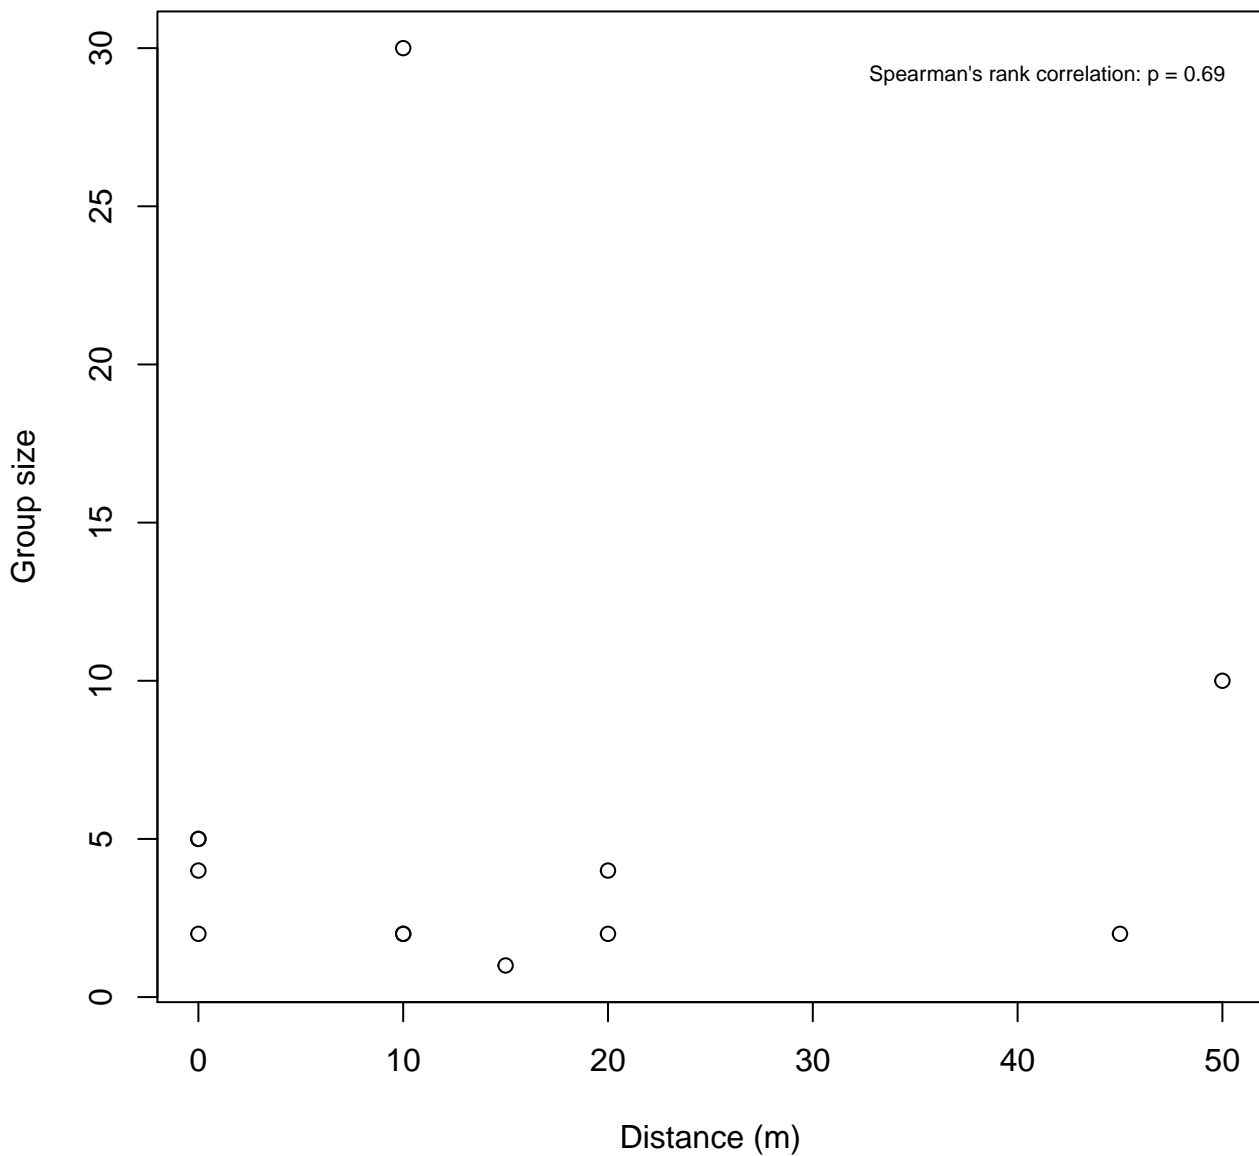

Brotogeris chiriri – Chiquitano dry forests – Brazil (N = 12, key function = hn)

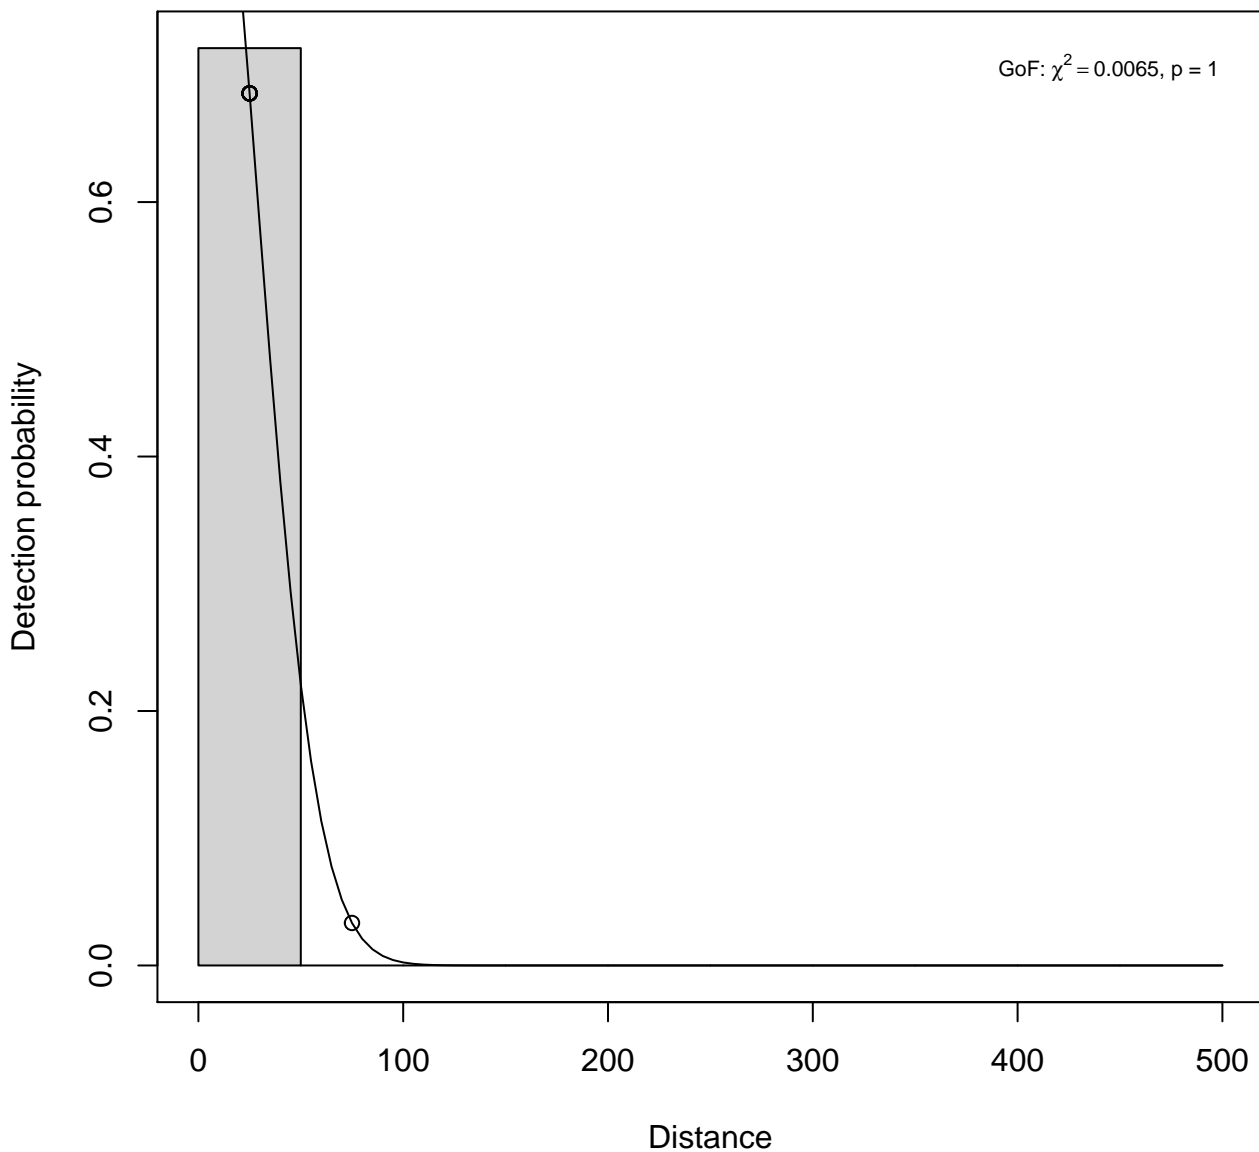

GoF:  $\chi^2 = \text{NA}$ , p = NA

Brotogetis chiriri – Chiquitano dry forests – Brazil (N = 12, key function = hn)

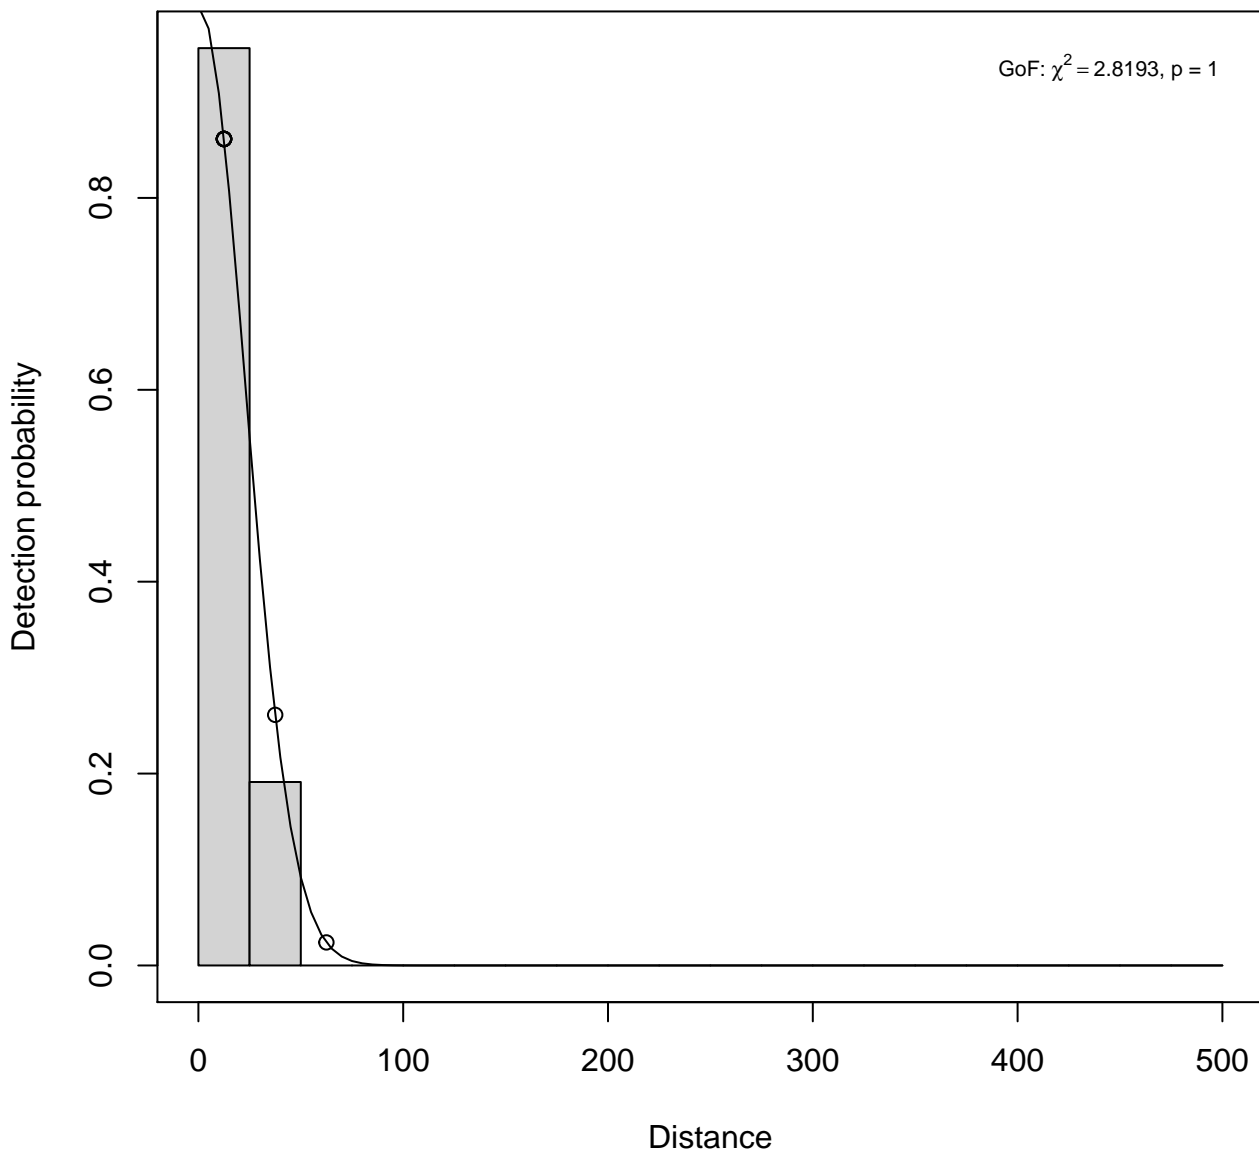

Supplement: s1 [file s1]
