# Supplementary material
Source: MDPI journal article supplement (https://www.mdpi.com/1424-2818/13/7/300)

# Orthopsittaca manilatus – Southwest Amazon moist forests – Peru

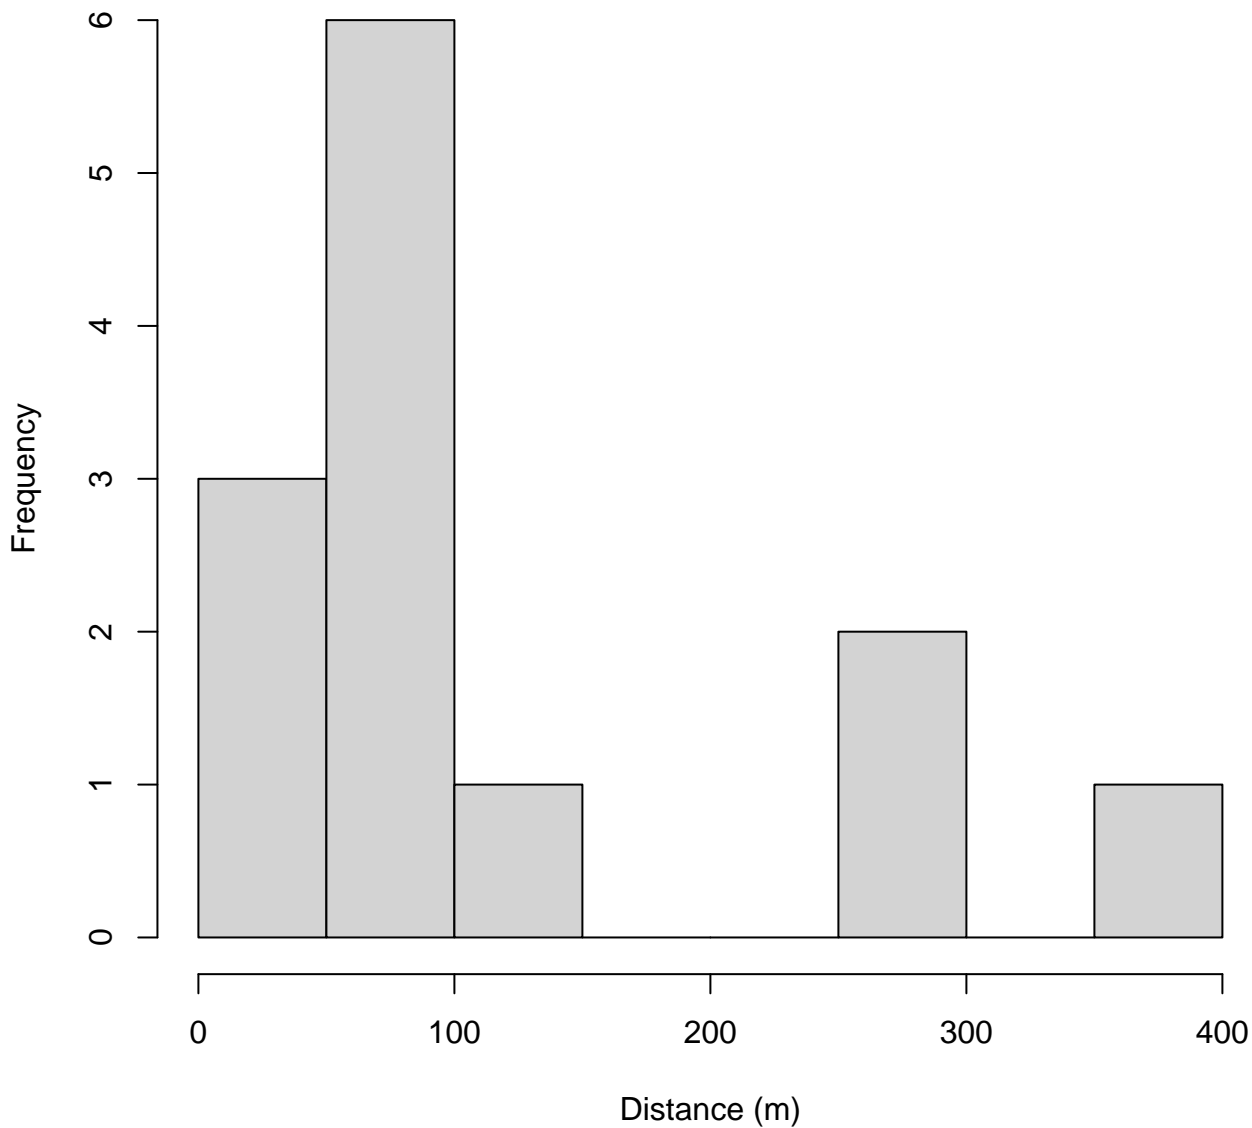

# Orthopsittaca manilatus – Southwest Amazon moist forests – Peru

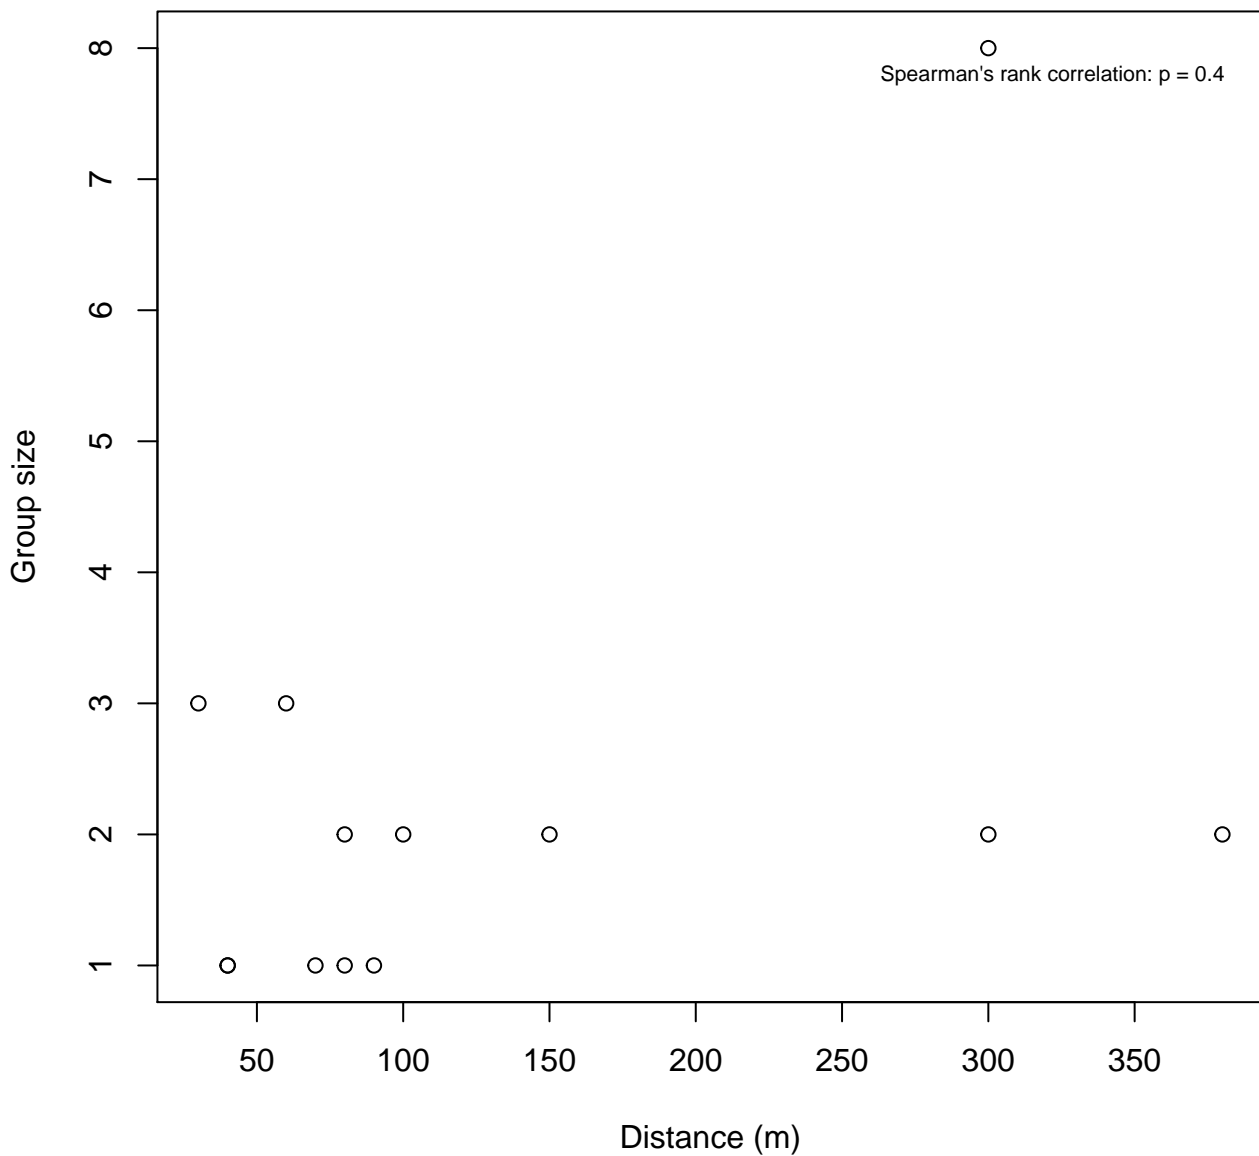

*Orthopsittaca manilatus* – Southwest Amazon moist forests – Peru (N = 13, key function = hn)

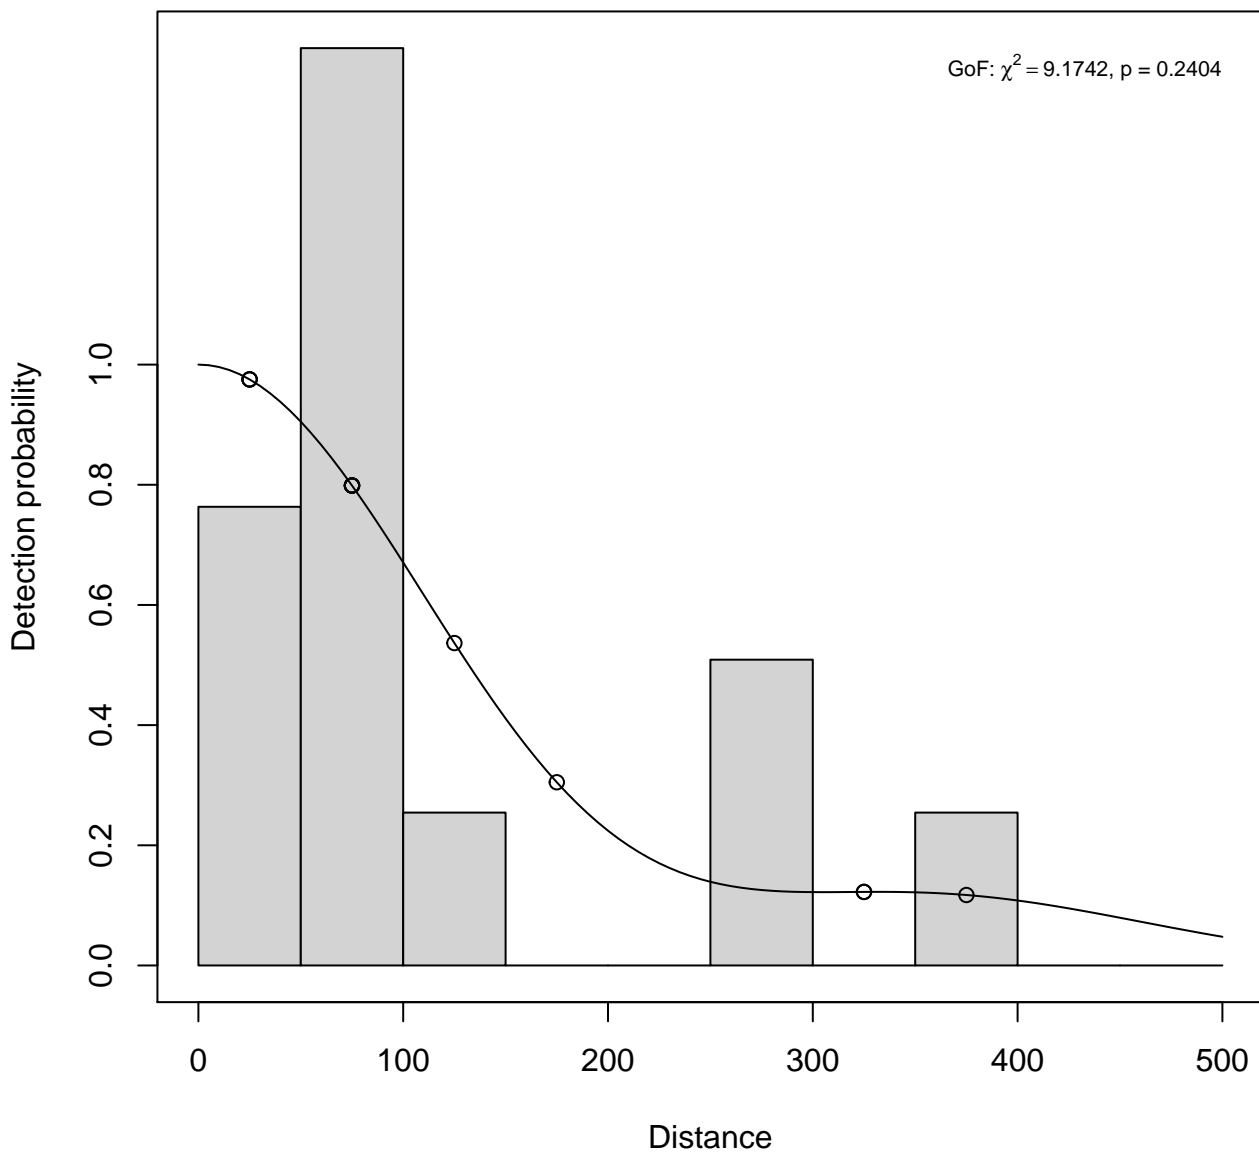

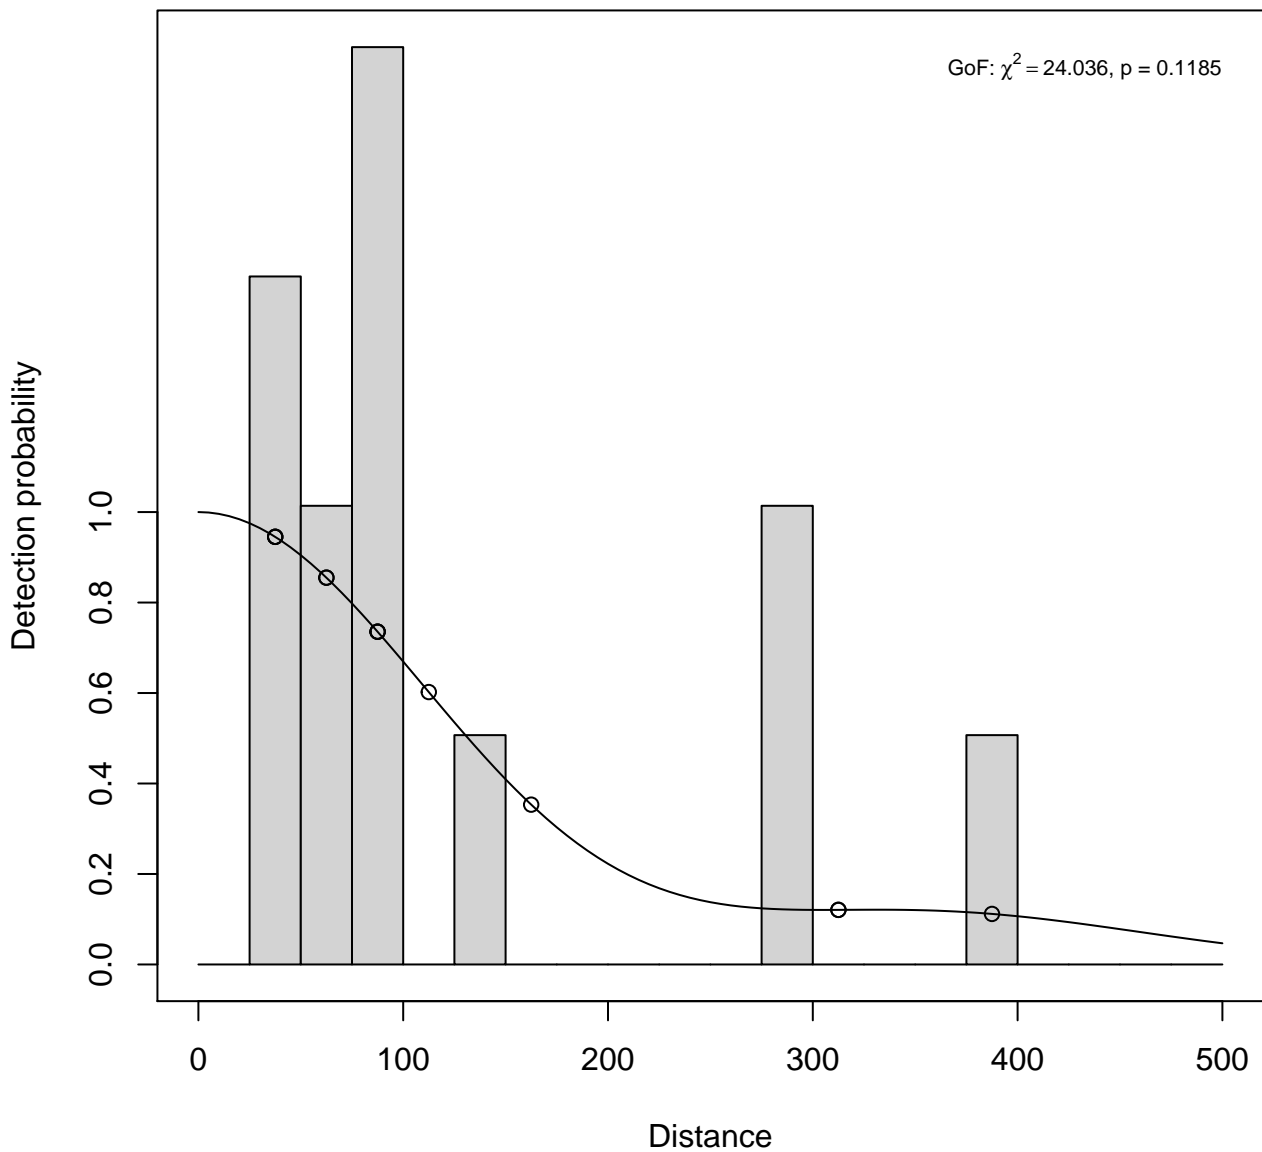

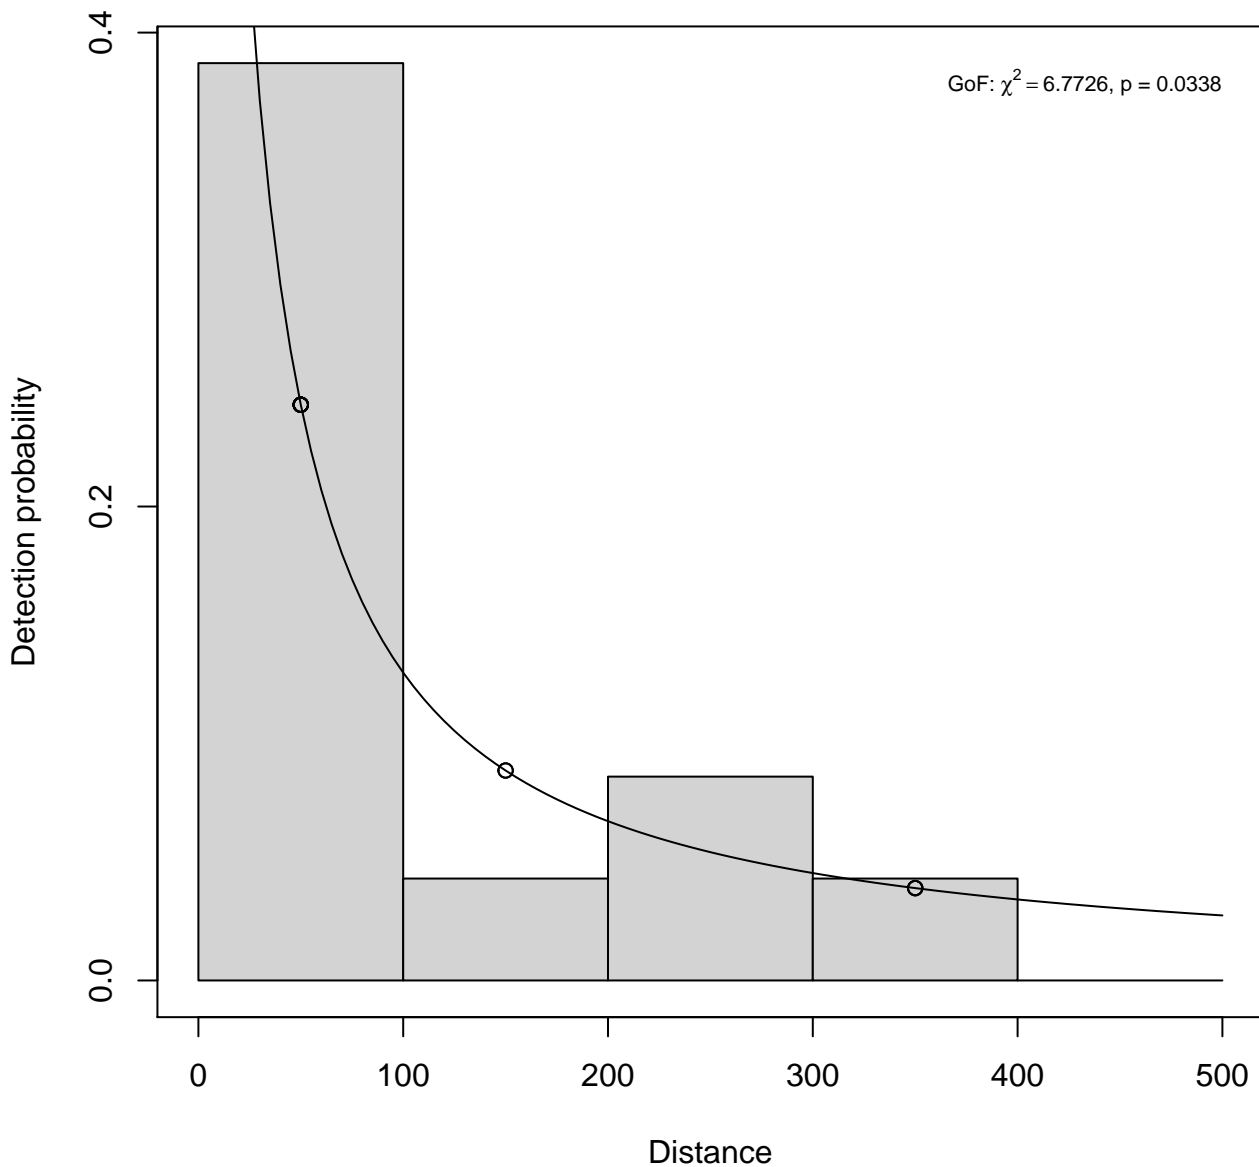

Supplement: s1 [file s1]
