# Supplementary material
Source: MDPI journal article supplement (https://www.mdpi.com/1424-2818/13/7/300)

# ***Ara rubrogenys* – Bolivian montane dry forests – Bolivia**

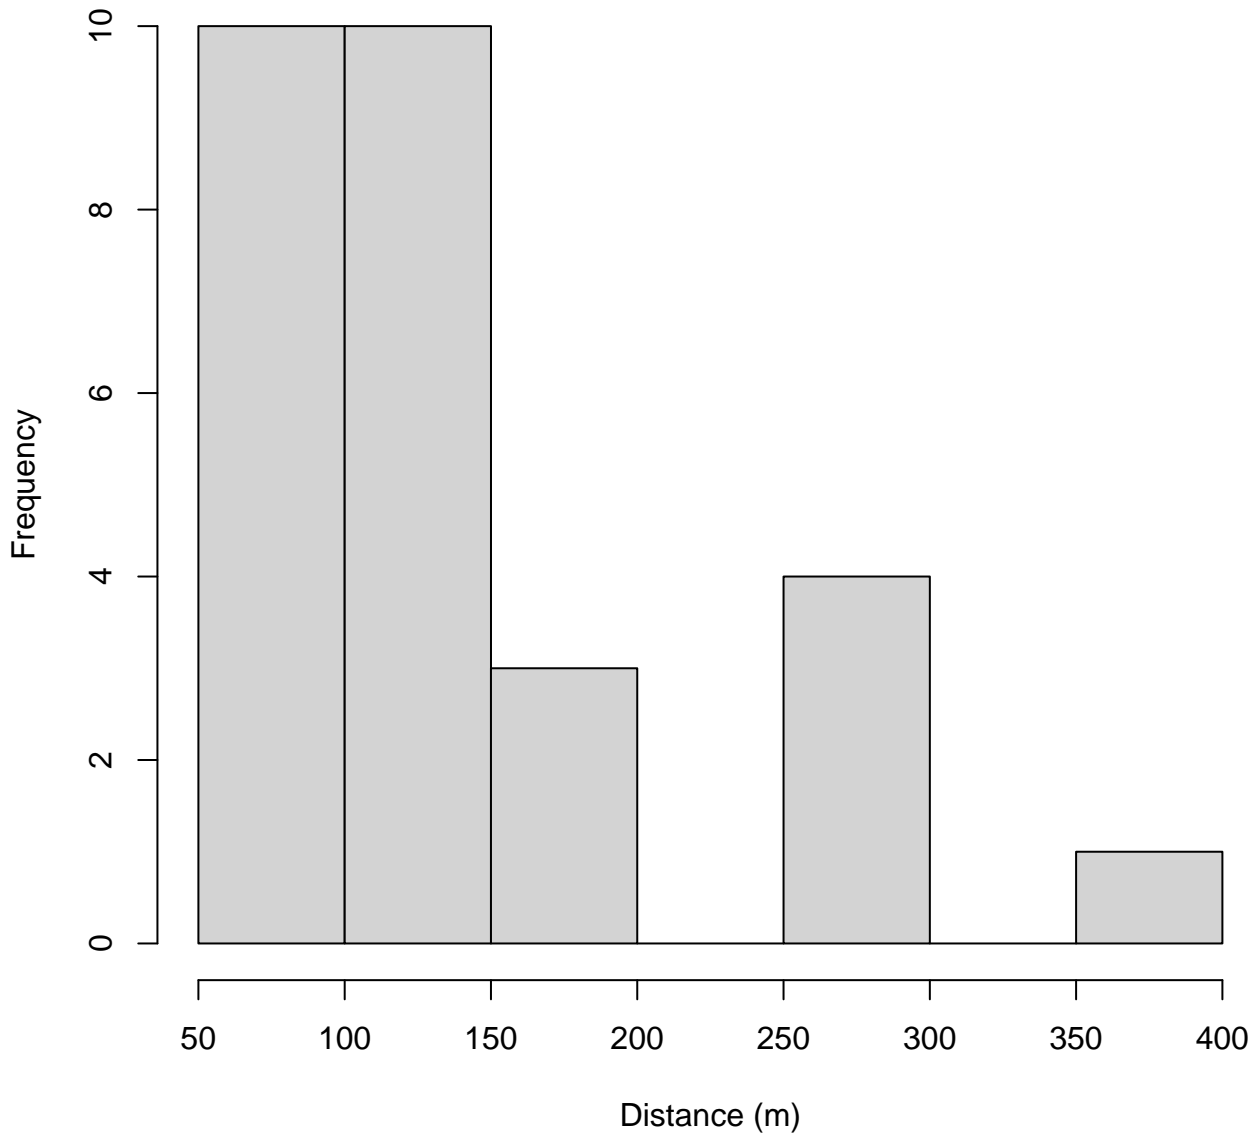

# **Ara rubrogenys – Bolivian montane dry forests – Bolivia**

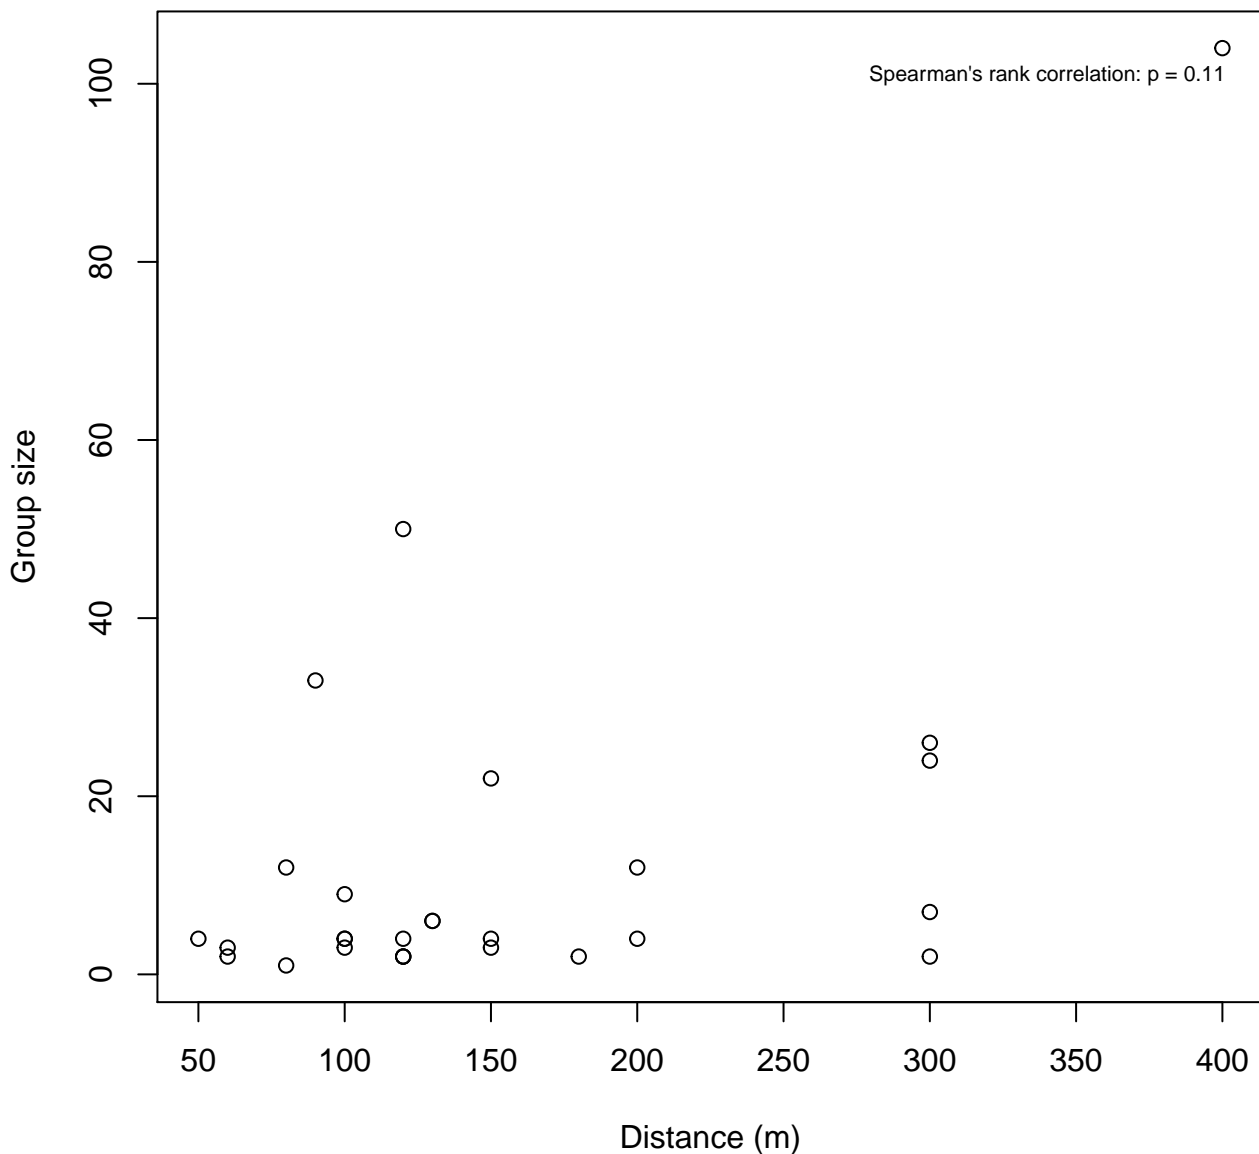

*Ara rubrogenys* – Bolivian montane dry forests – Bolivia (N = 28, key function = unif)

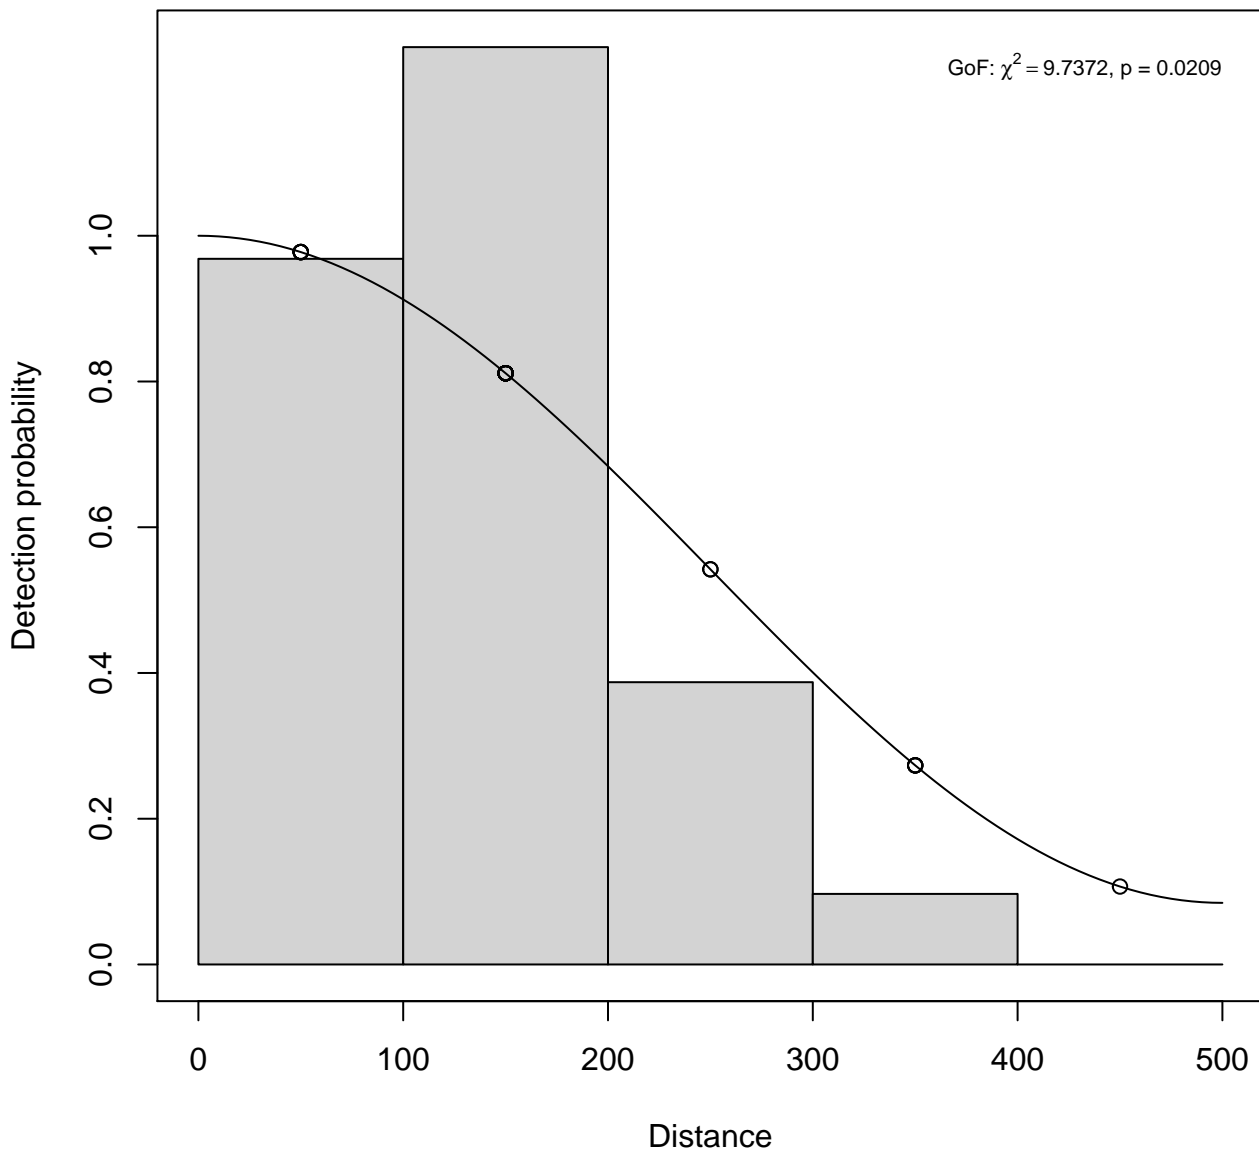

*Ara rubrogenys* – Bolivian montane dry forests – Bolivia (N = 28, key function = unif)

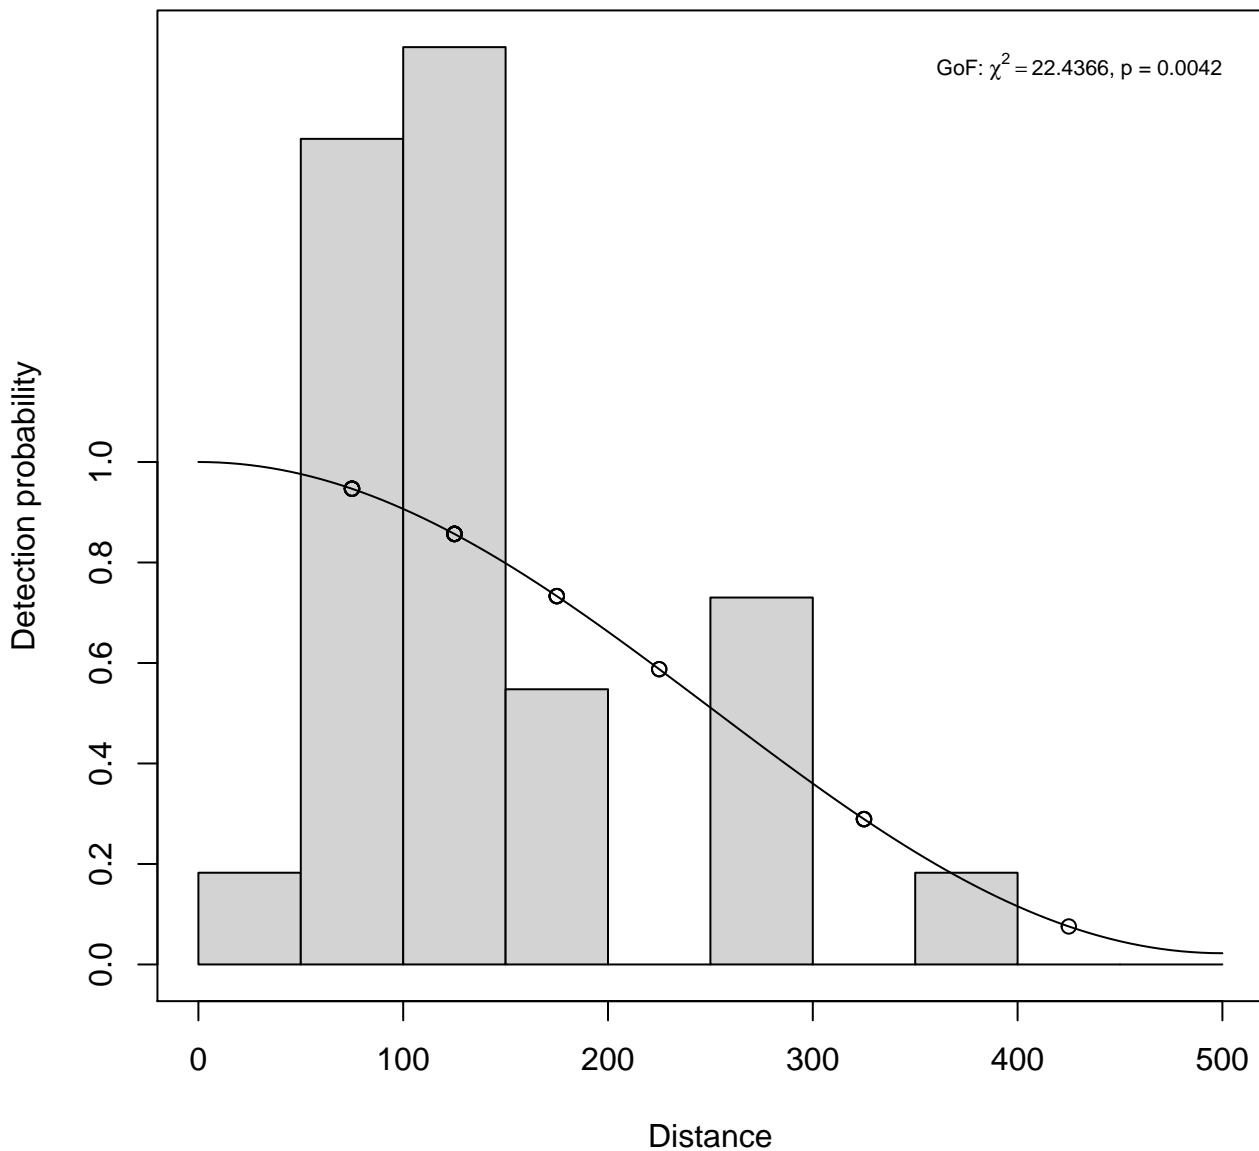

*Ara rubrogenys* – Bolivian montane dry forests – Bolivia (N = 28, key function = unif)

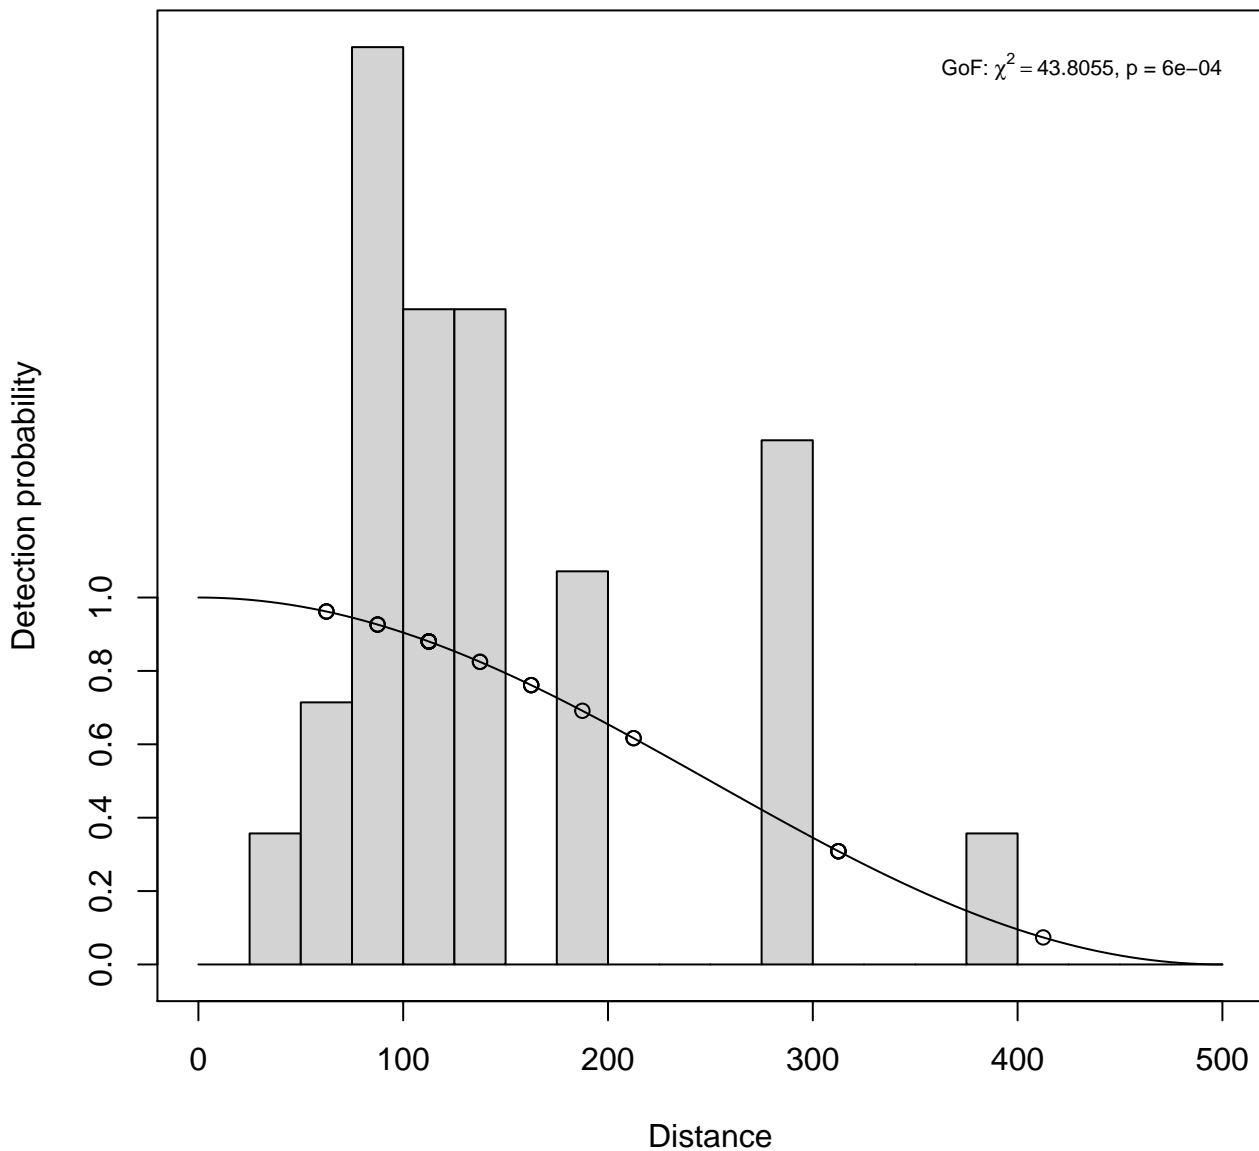

Supplement: s1 [file s1]
