# Supplementary material
Source: MDPI journal article supplement (https://www.mdpi.com/1424-2818/13/7/300)

# Aratinga nenday – Pantanal – Bolivia

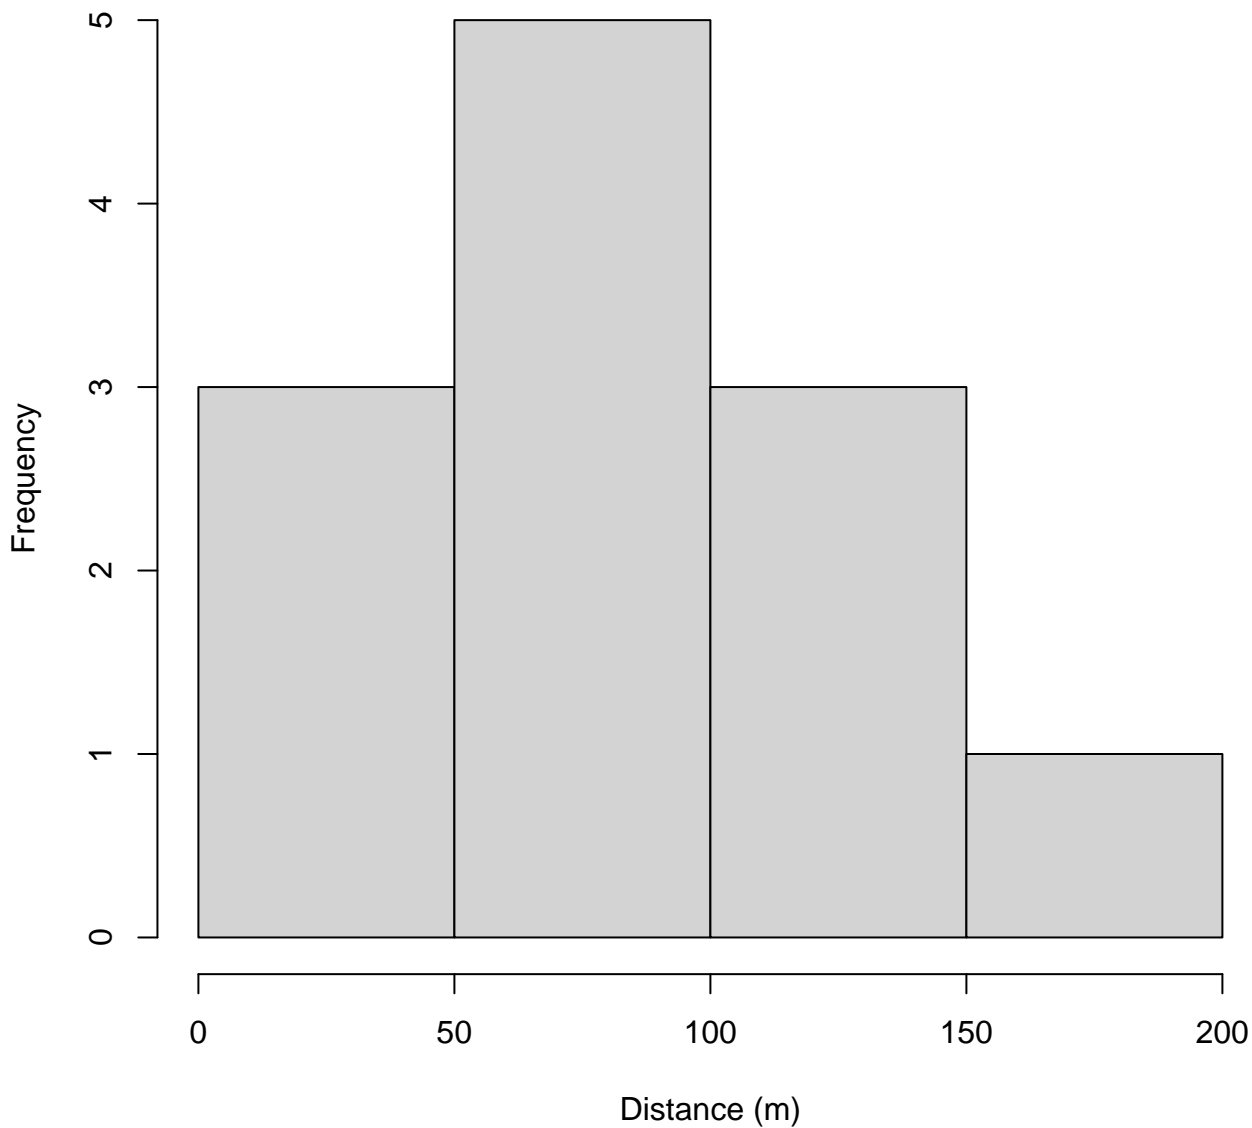

# Aratinga nenday – Pantanal – Bolivia

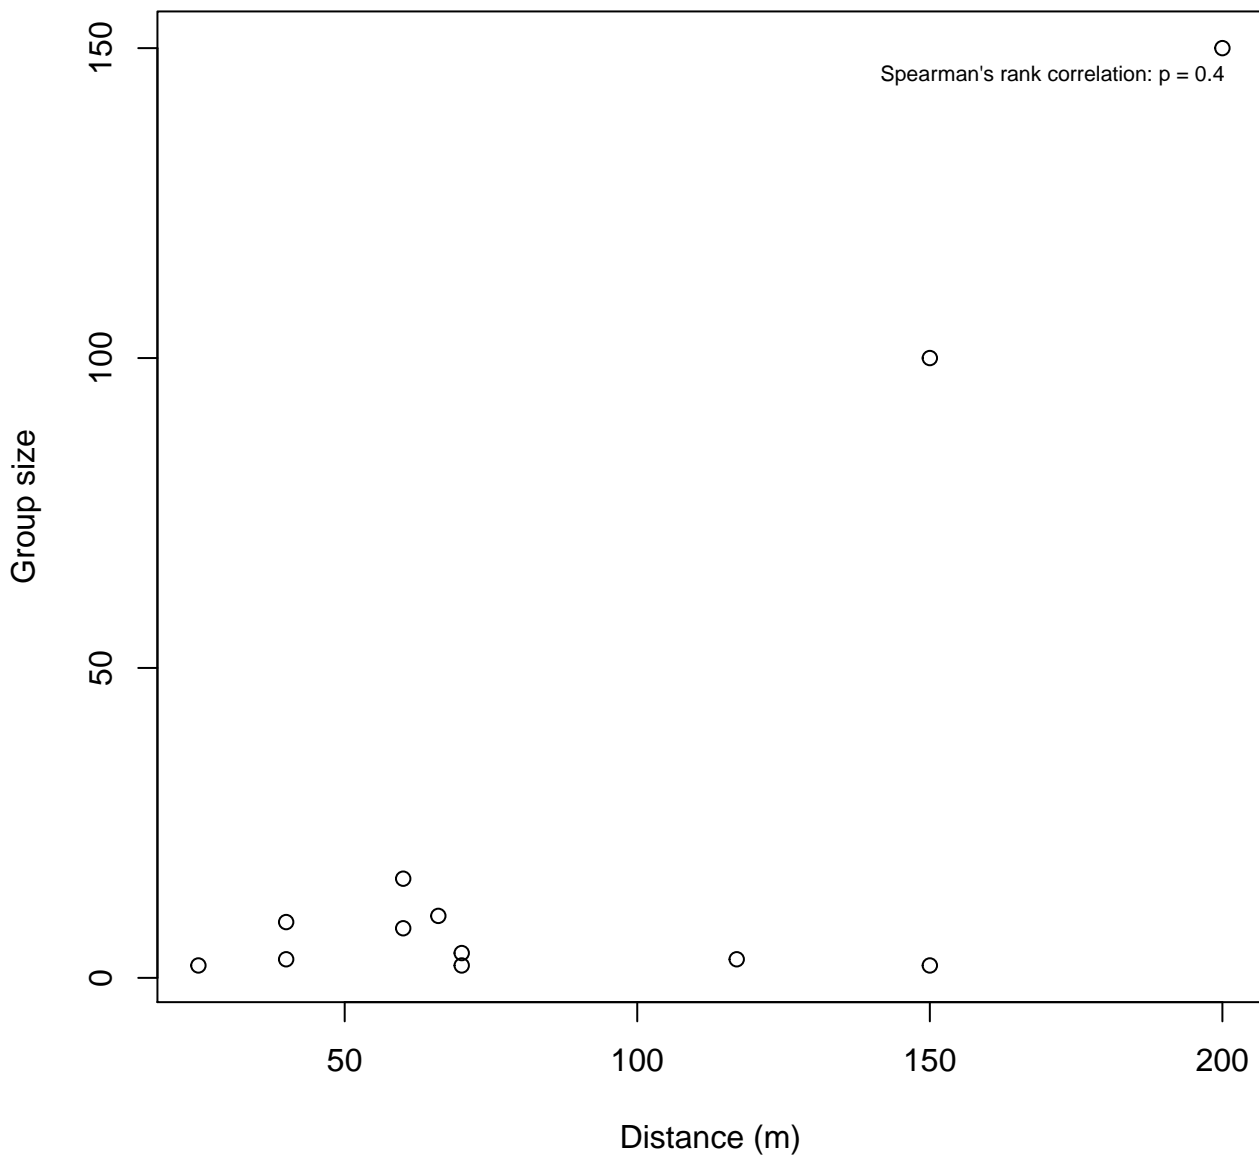

Aratinga nenday – Pantanal – Bolivia (N = 12, key function = hn)

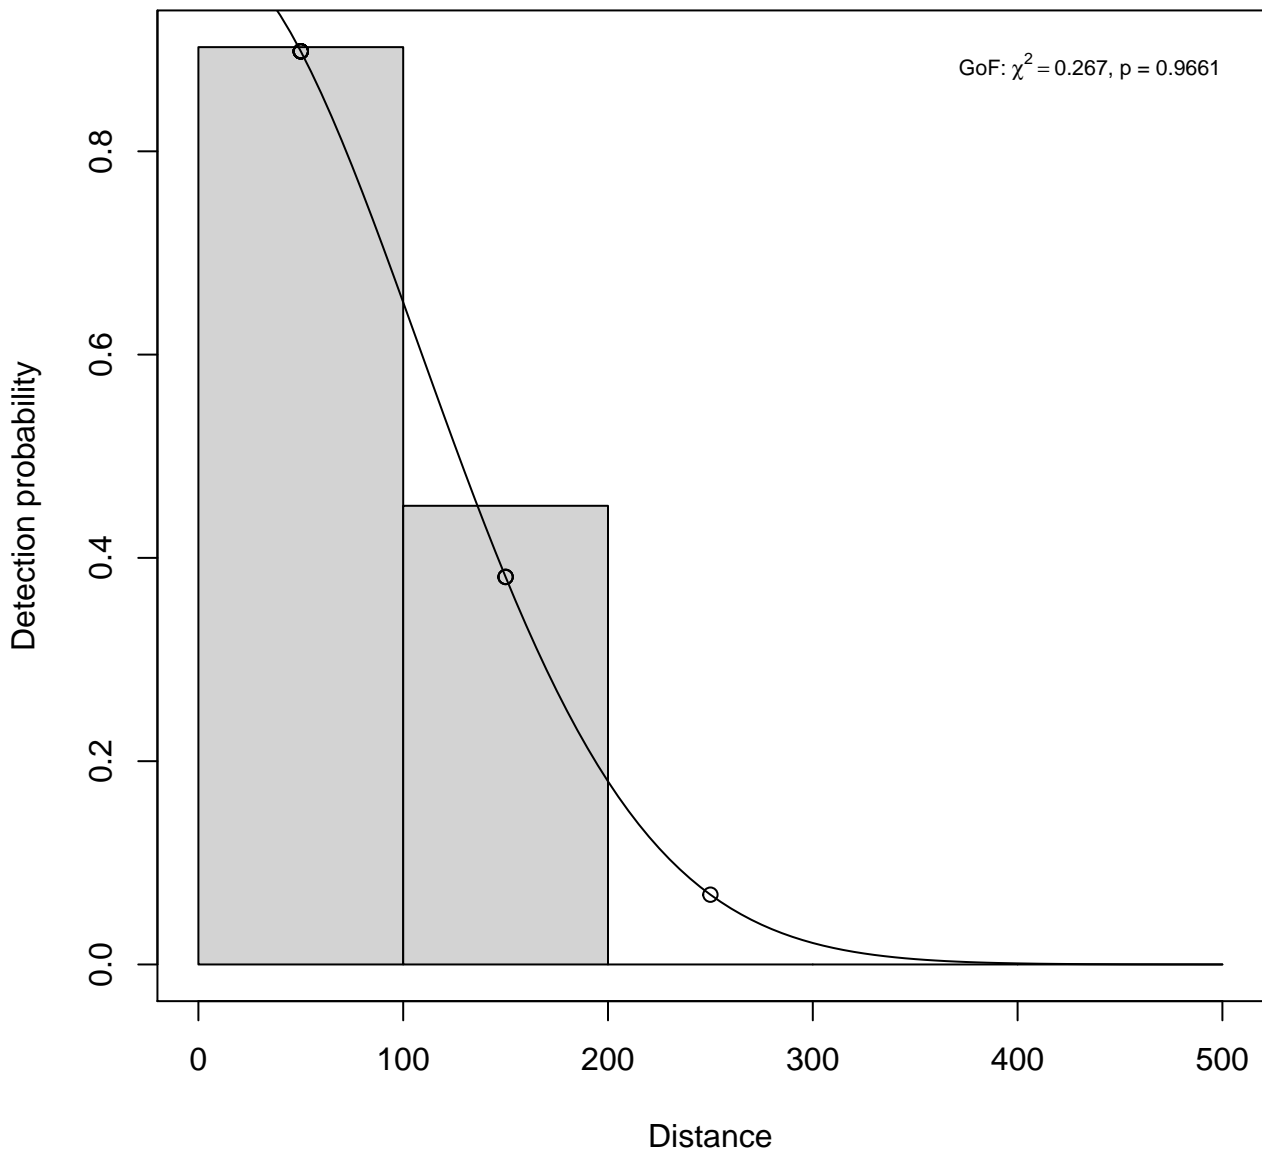

Aratinga nenday – Pantanal – Bolivia (N = 12, key function = hn)

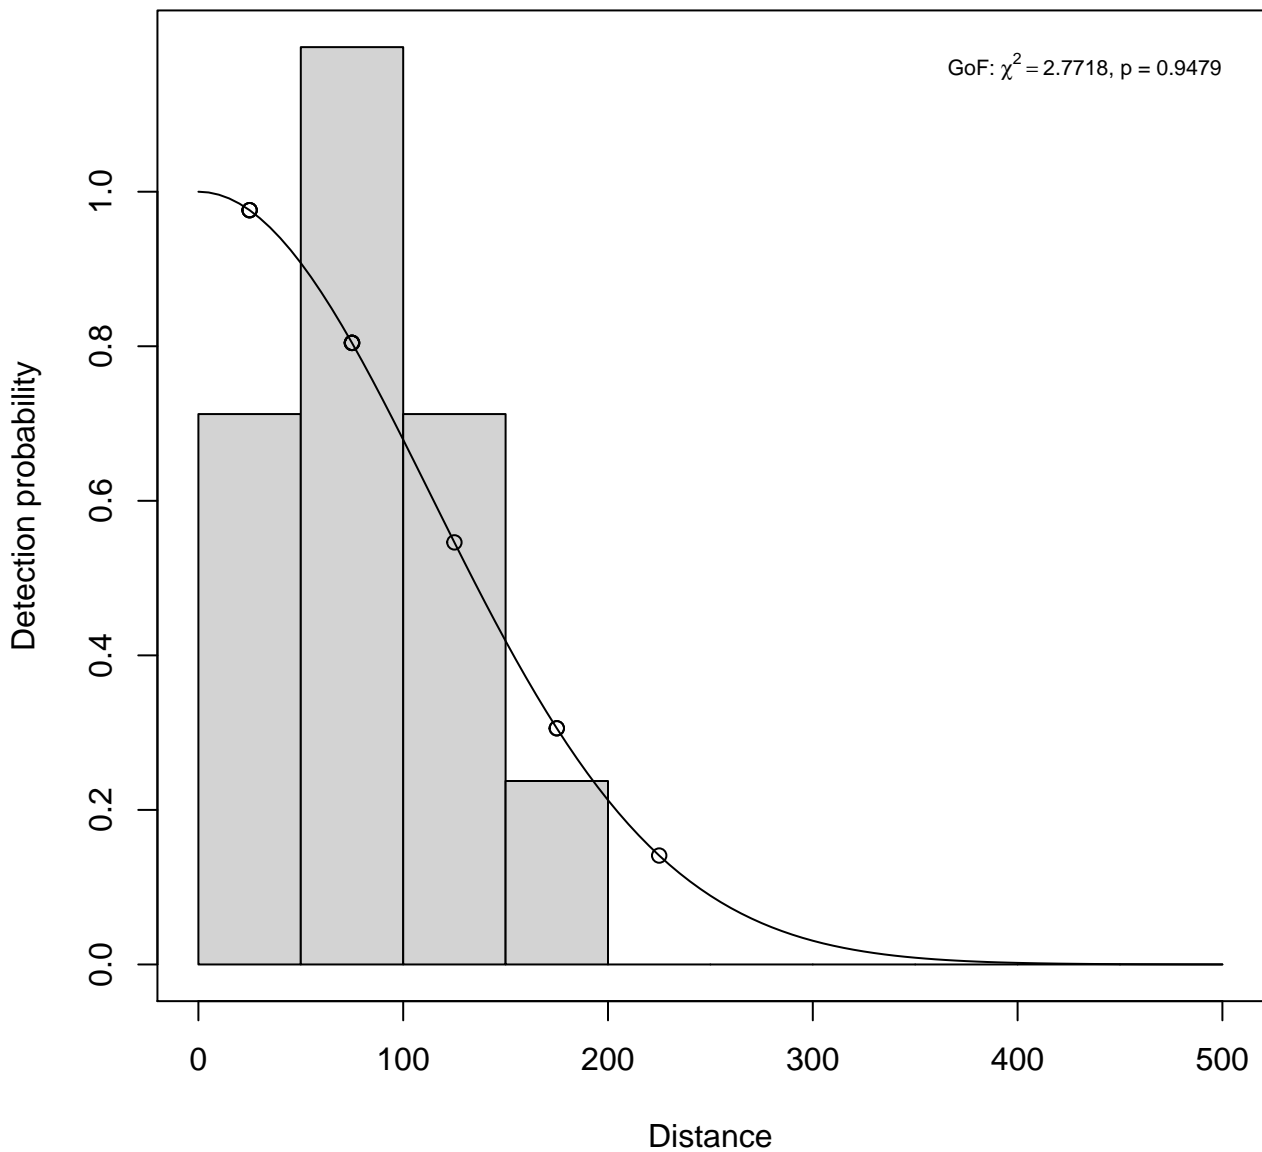

Aratinga nenday – Pantanal – Bolivia (N = 12, key function = hn)

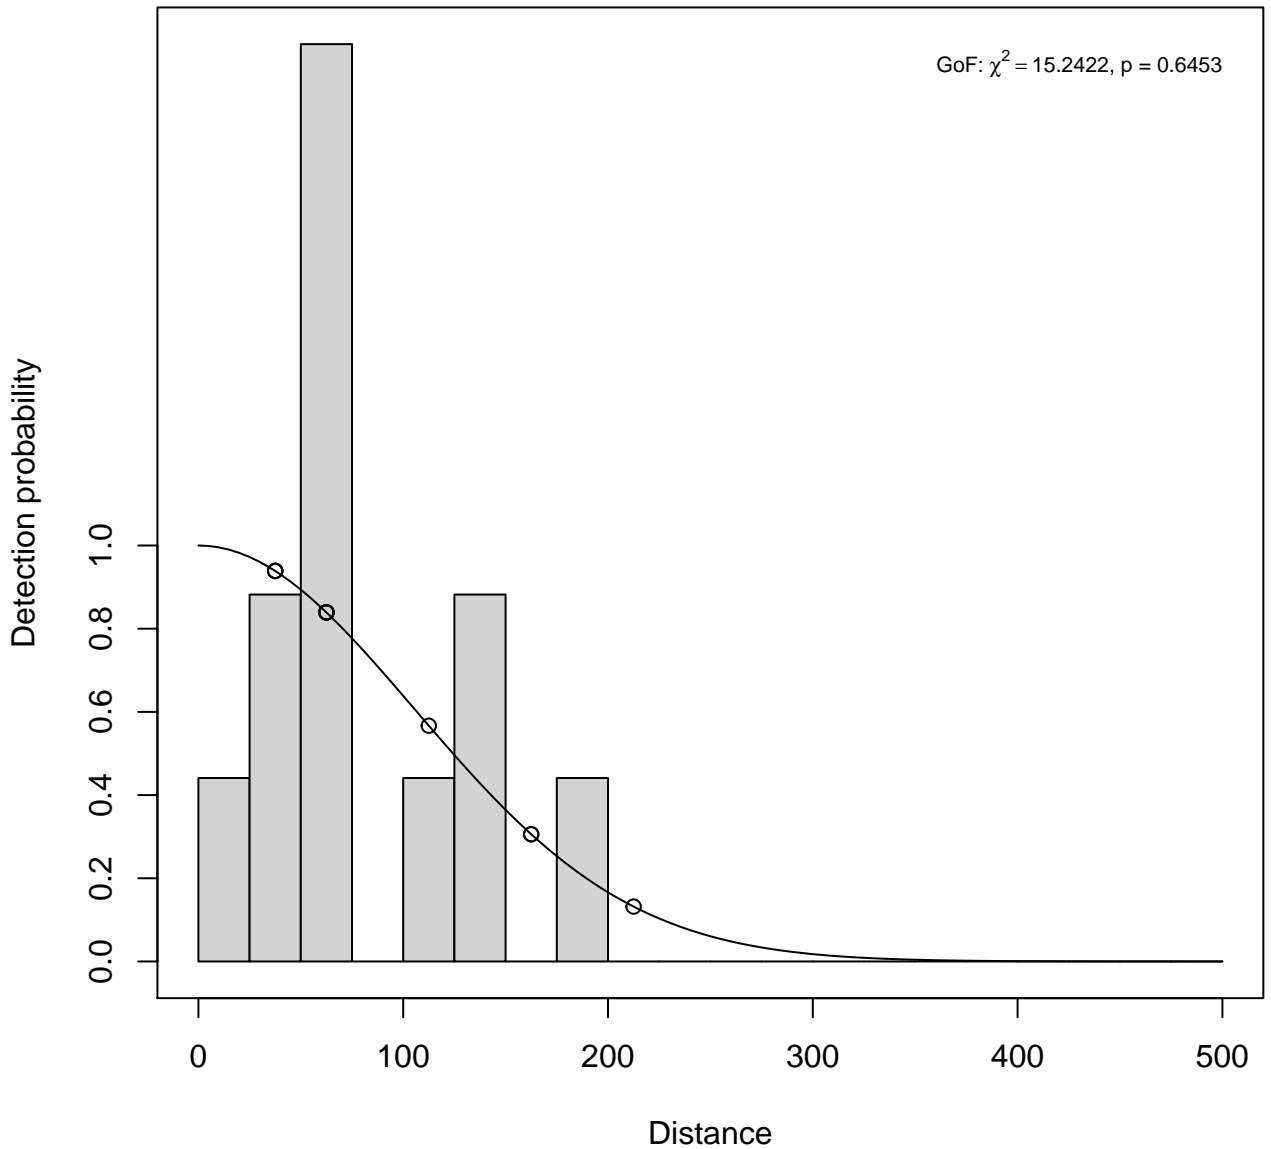

Supplement: s1 [file s1]
