# Supplementary material
Source: MDPI journal article supplement (https://www.mdpi.com/1424-2818/13/7/300)

**Psittacara leucophthalmus – Eastern Cordillera Real montane forests – Ecuador**

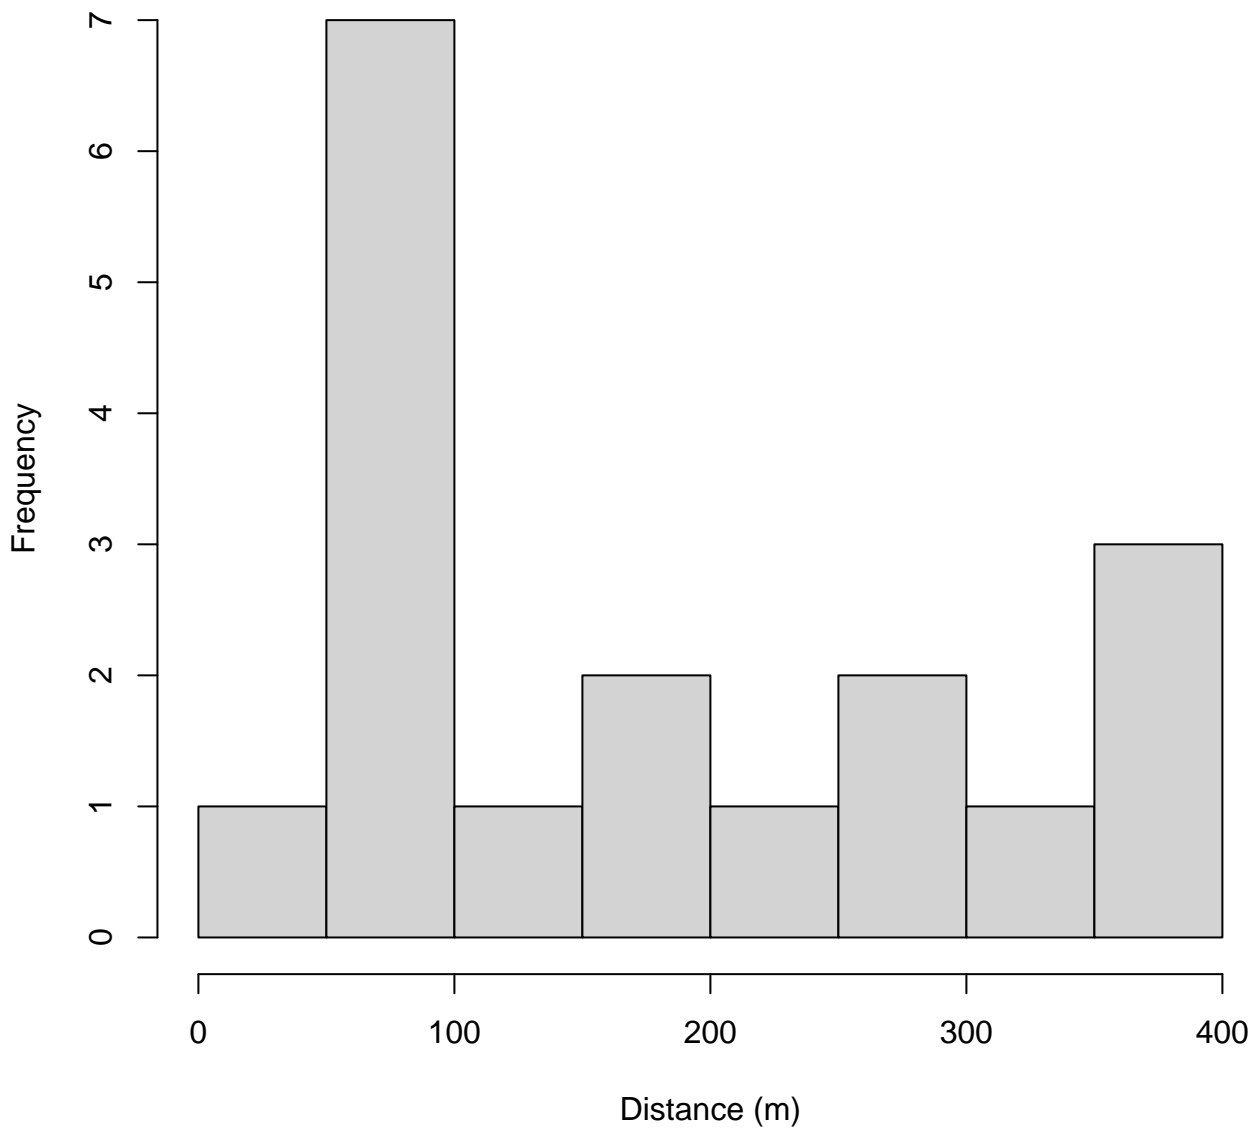

# Psittacara leucophthalmus – Eastern Cordillera Real montane forests – Ecuador

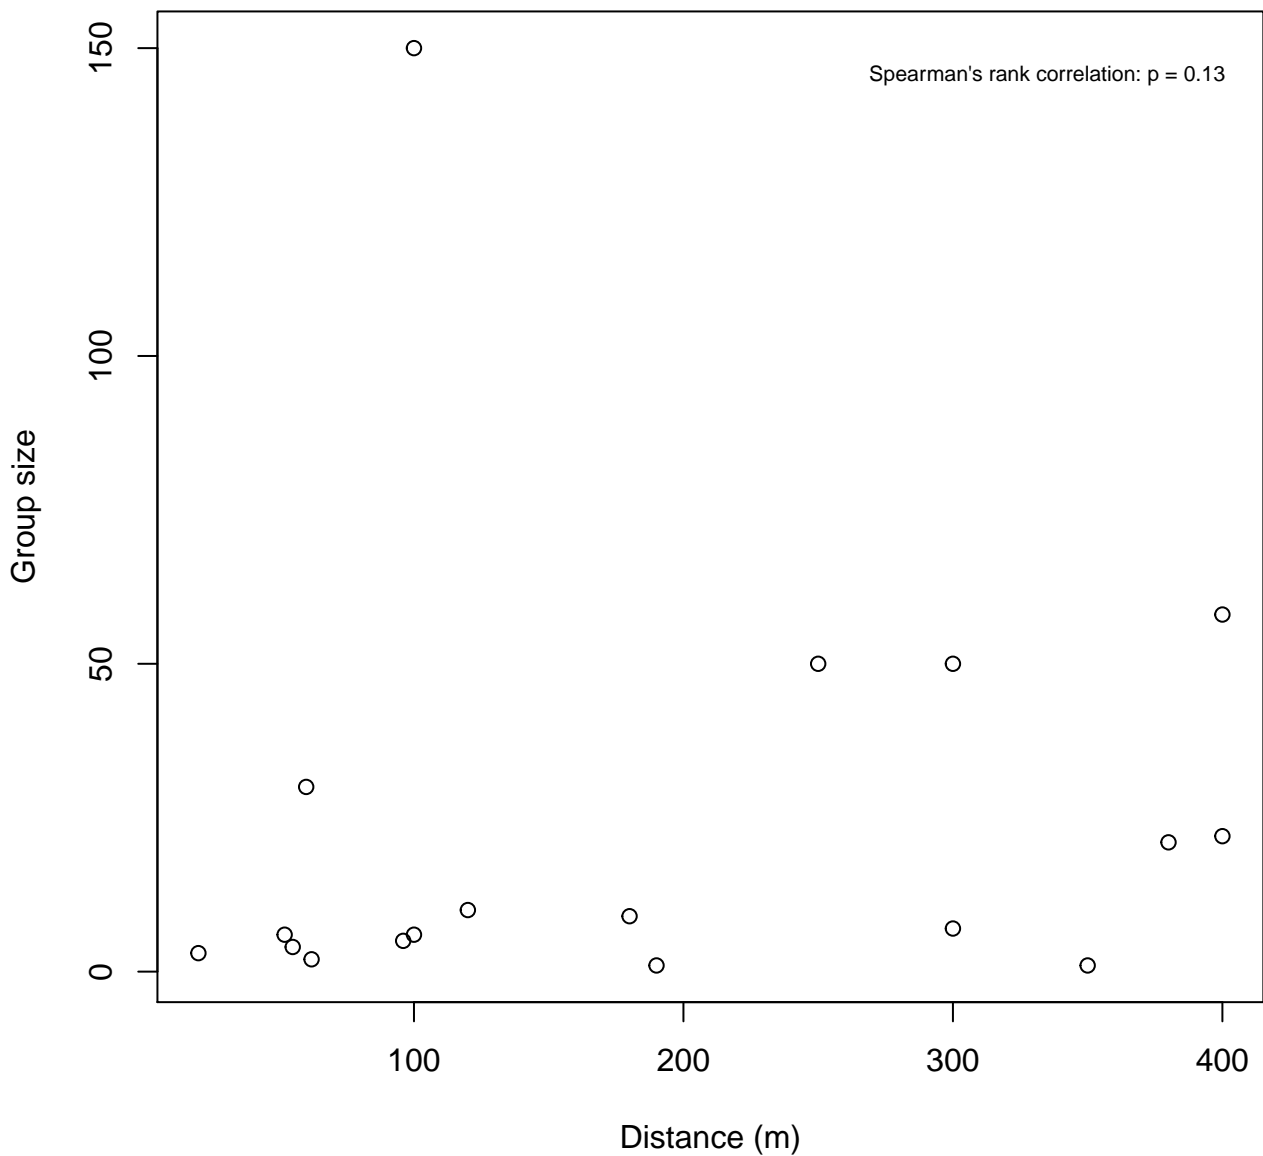

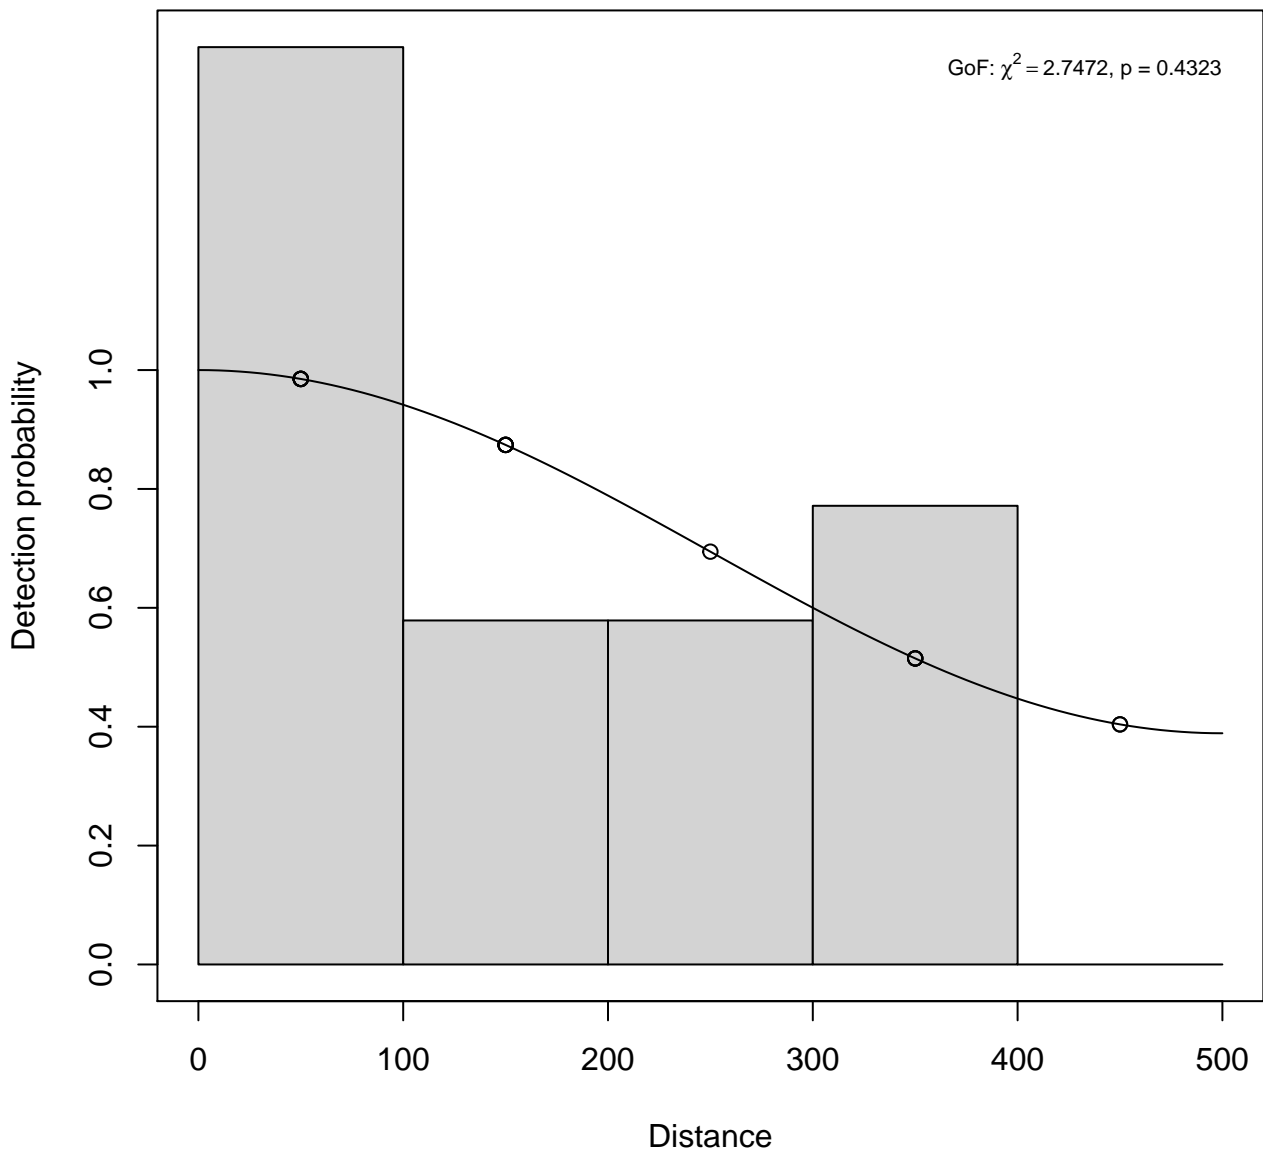

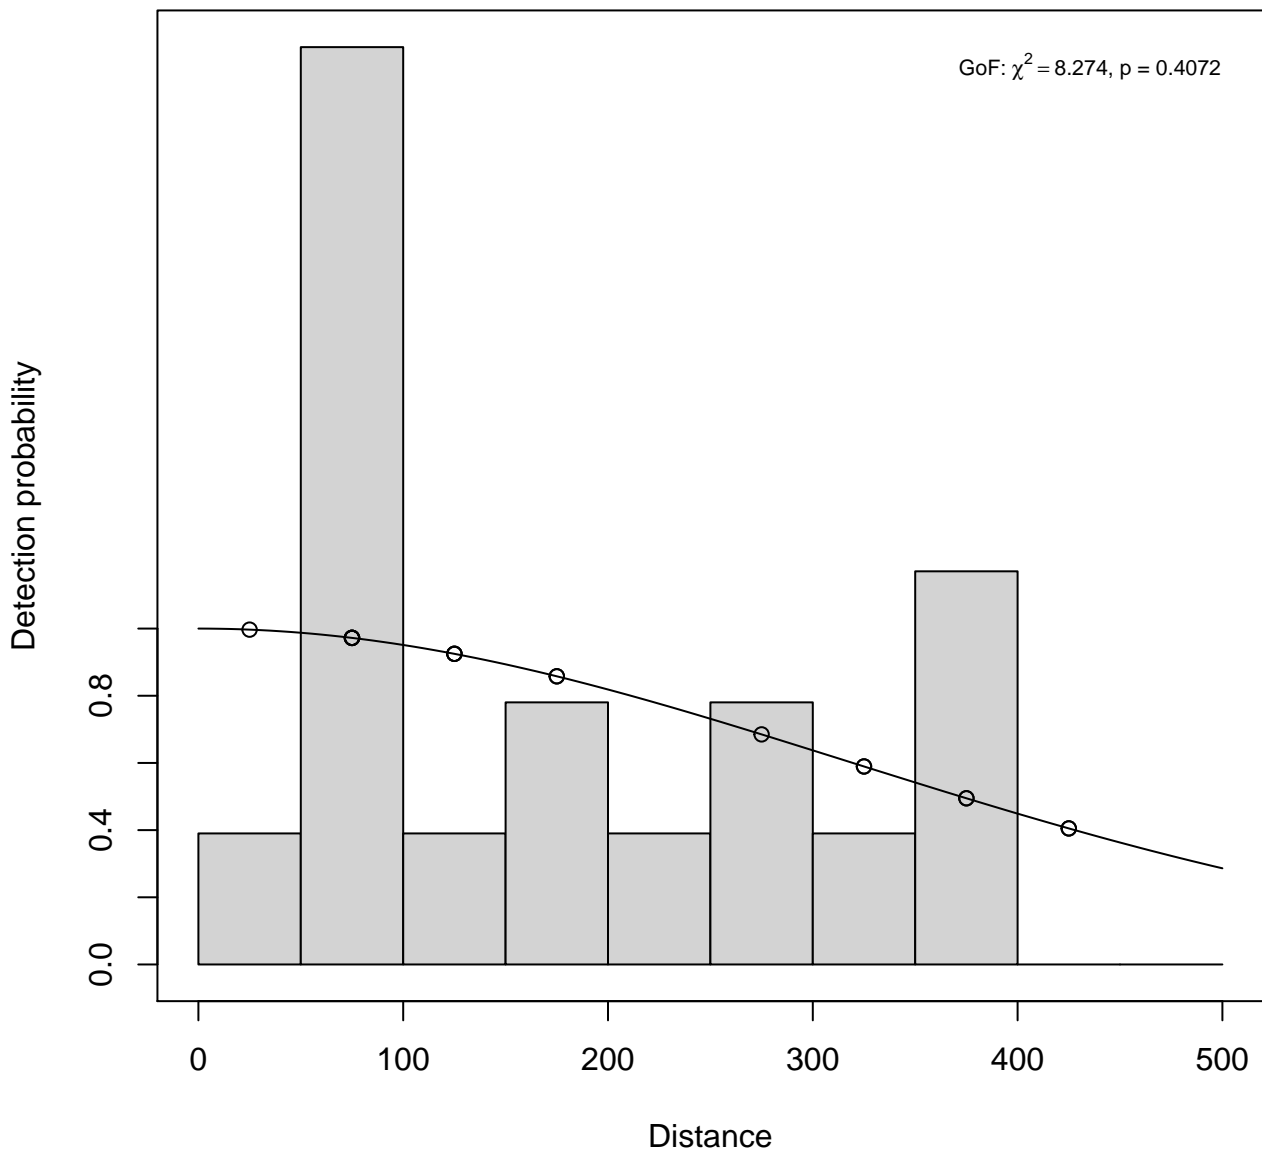

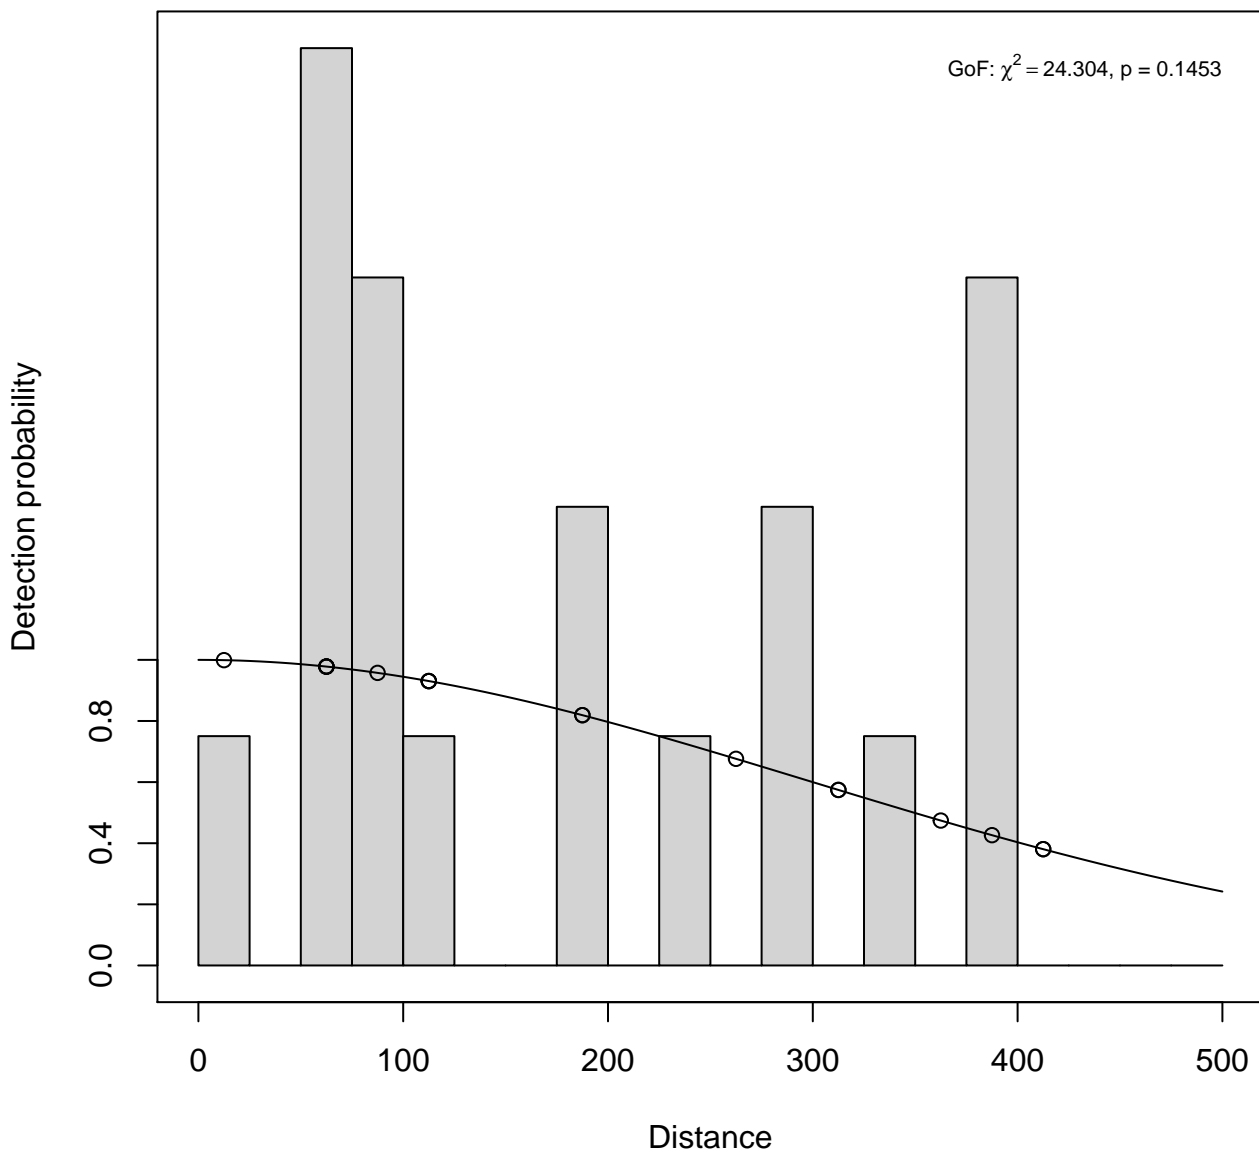

Supplement: s1 [file s1]
