# Supplementary material
Source: MDPI journal article supplement (https://www.mdpi.com/1424-2818/13/7/300)

# Amazona pretrei – Araucaria moist forests – Brazil

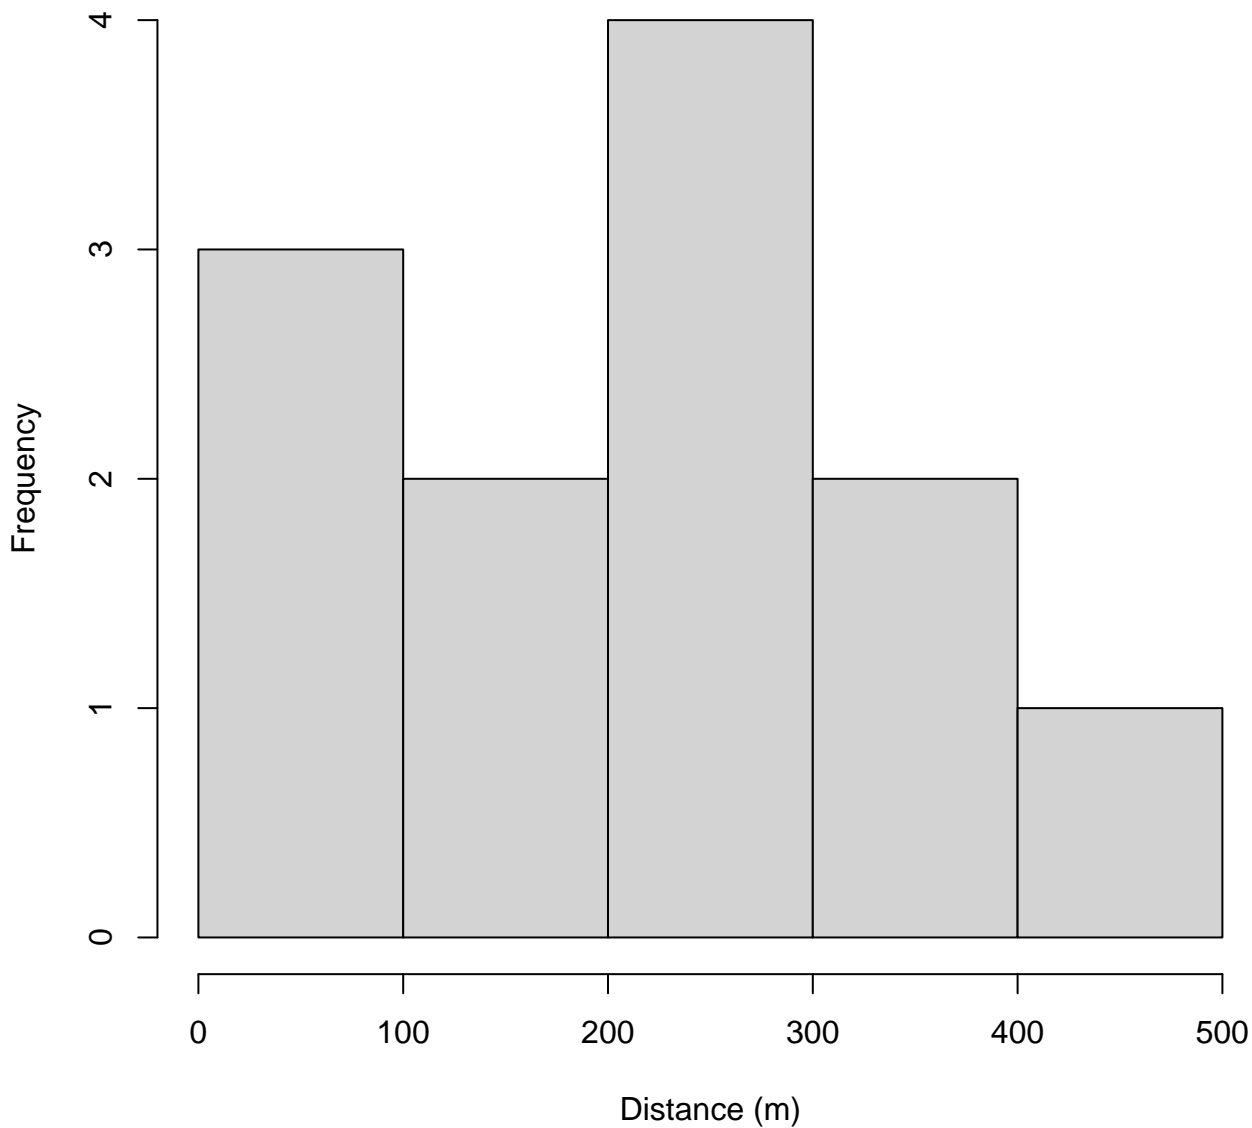

# Amazona pretrei – Araucaria moist forests – Brazil

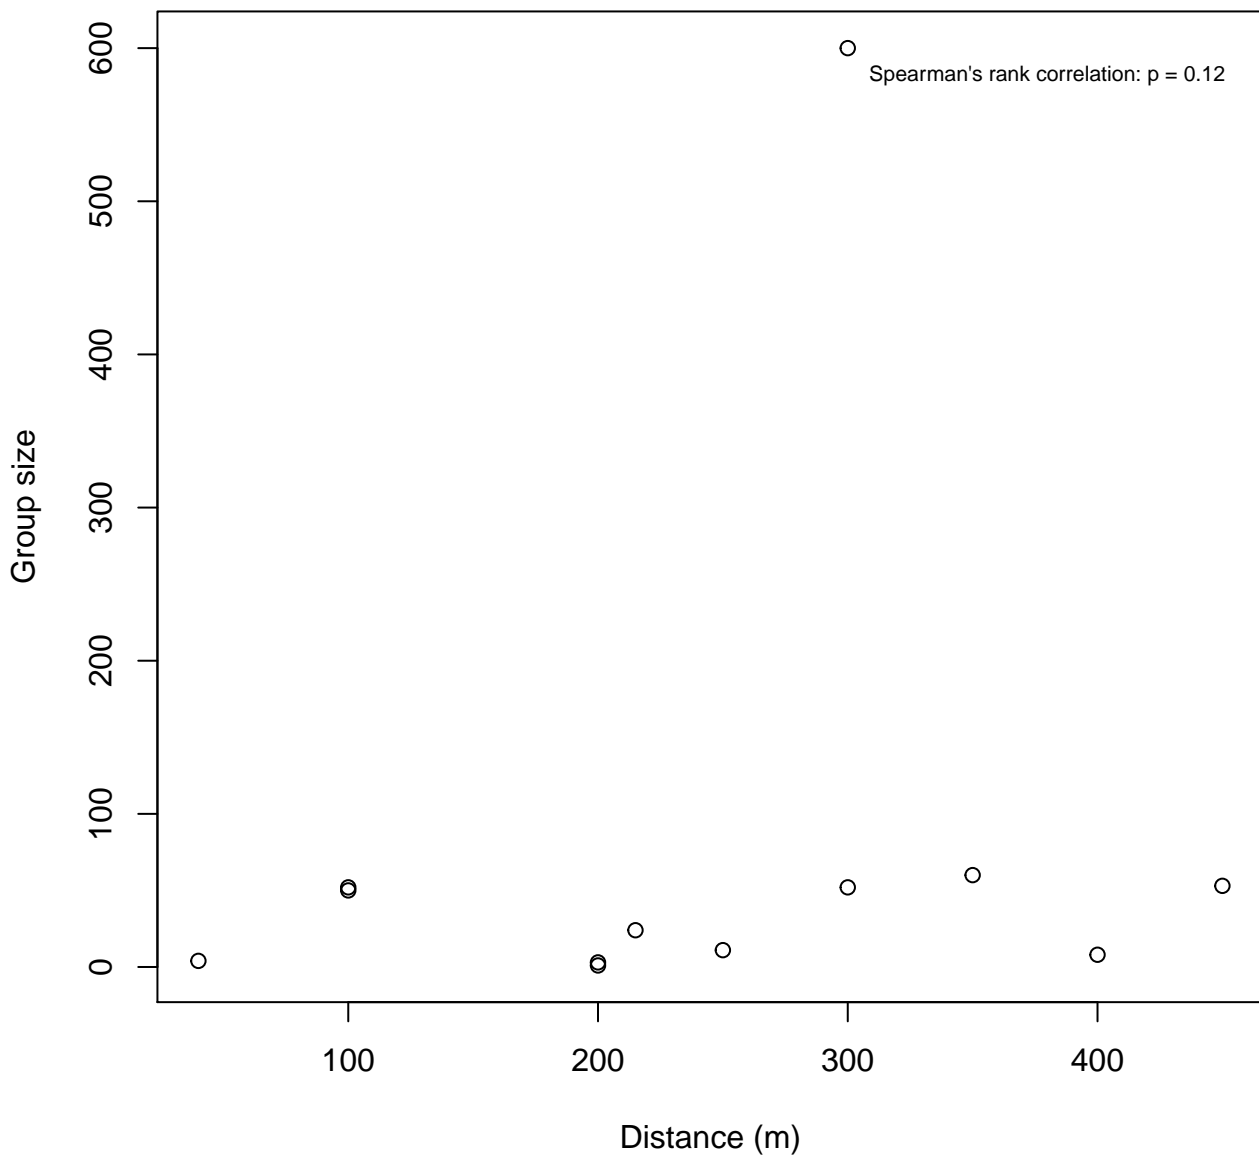

Amazona pretrei – Araucaria moist forests – Brazil (N = 12, key function = unif)

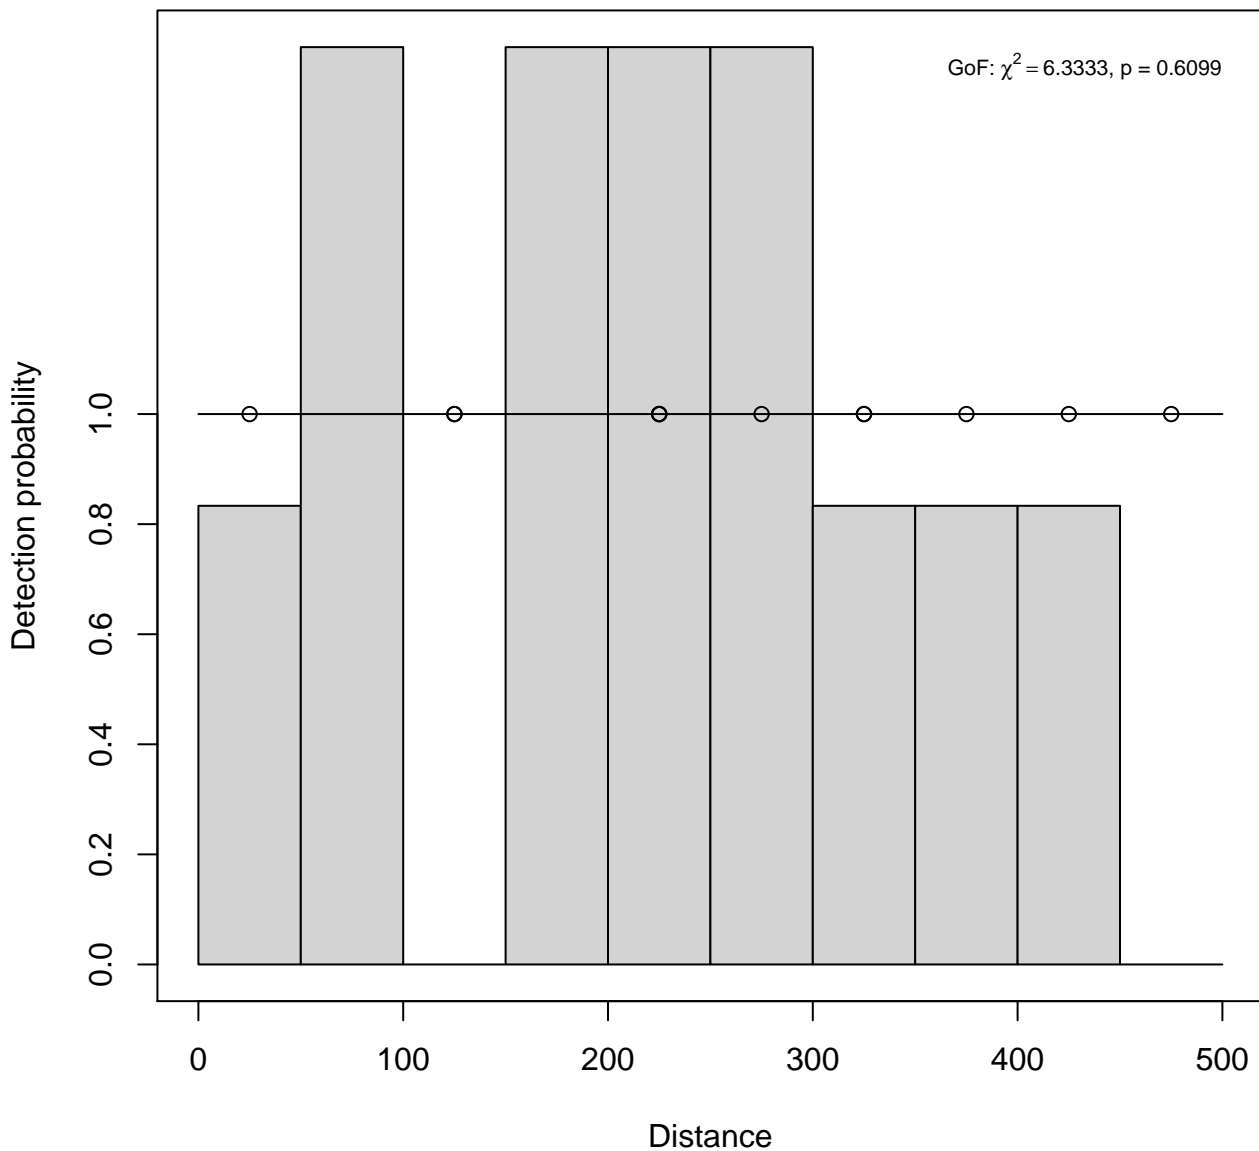

Amazona pretrei – Araucaria moist forests – Brazil (N = 12, key function = hn)

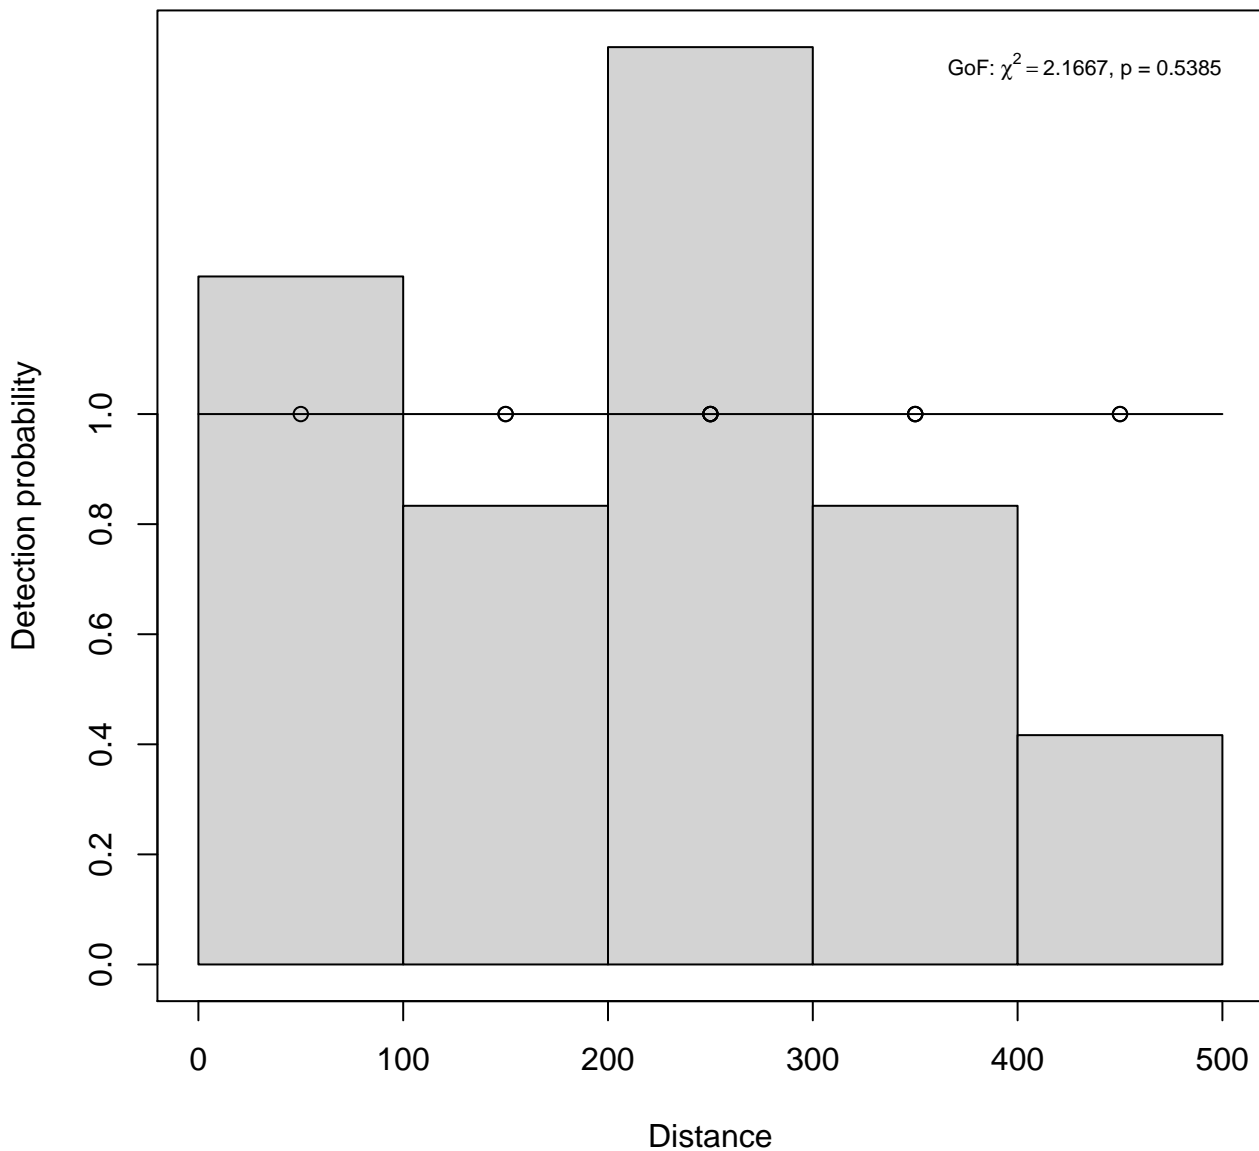

Amazona pretrei – Araucaria moist forests – Brazil (N = 12, key function = hn)

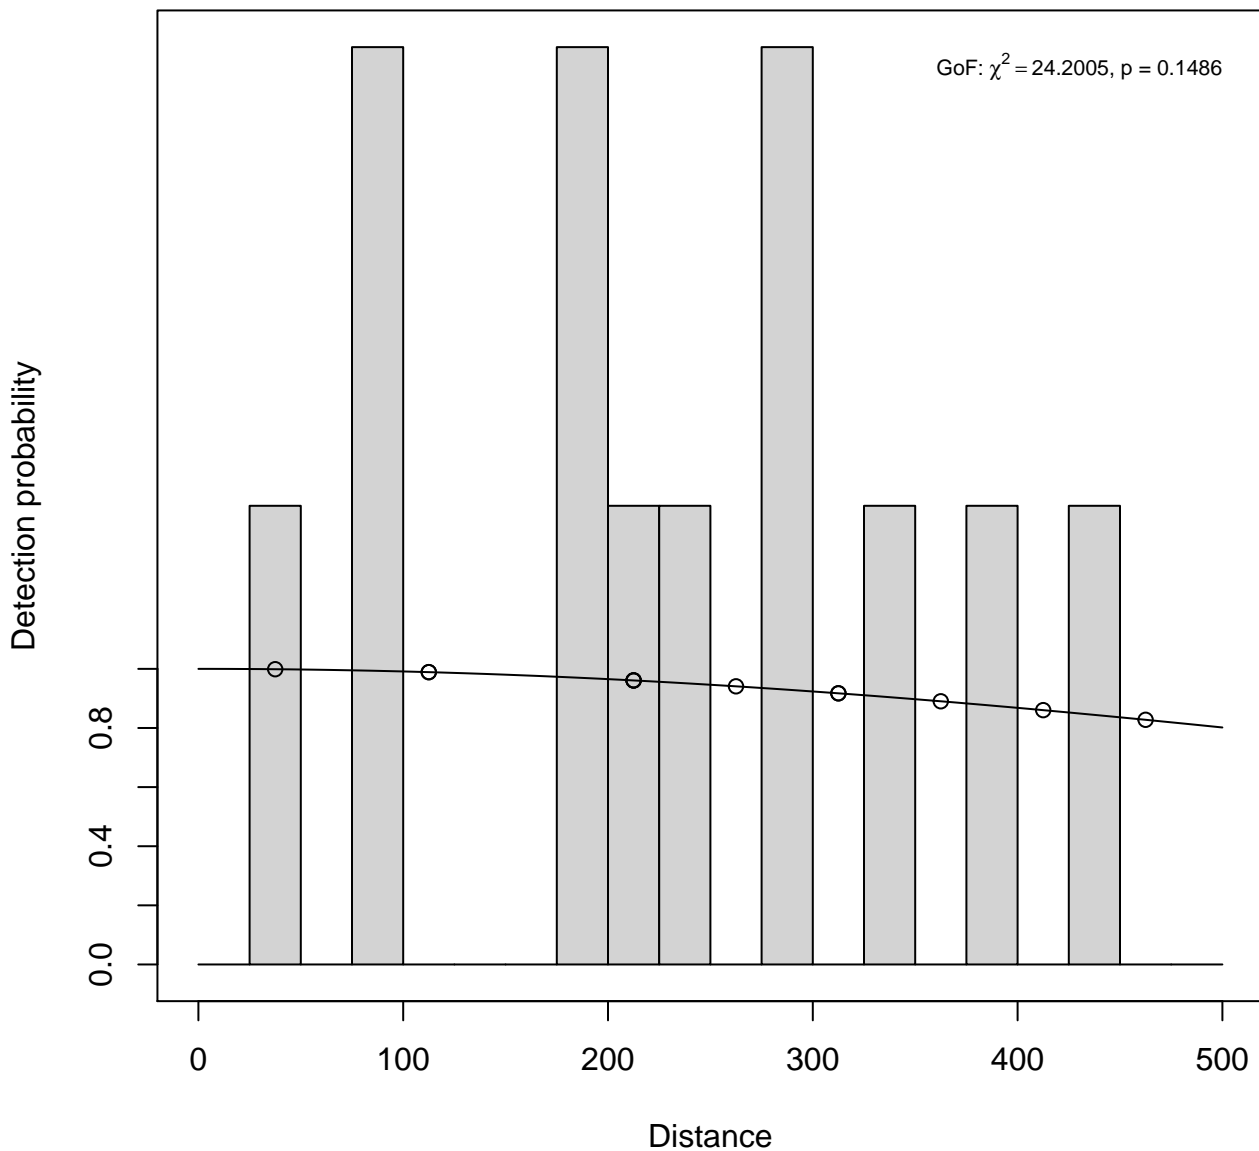

Supplement: s1 [file s1]
