# Supplementary material
Source: MDPI journal article supplement (https://www.mdpi.com/1424-2818/13/7/300)

# Amazona aestiva – Pantanal – Brazil

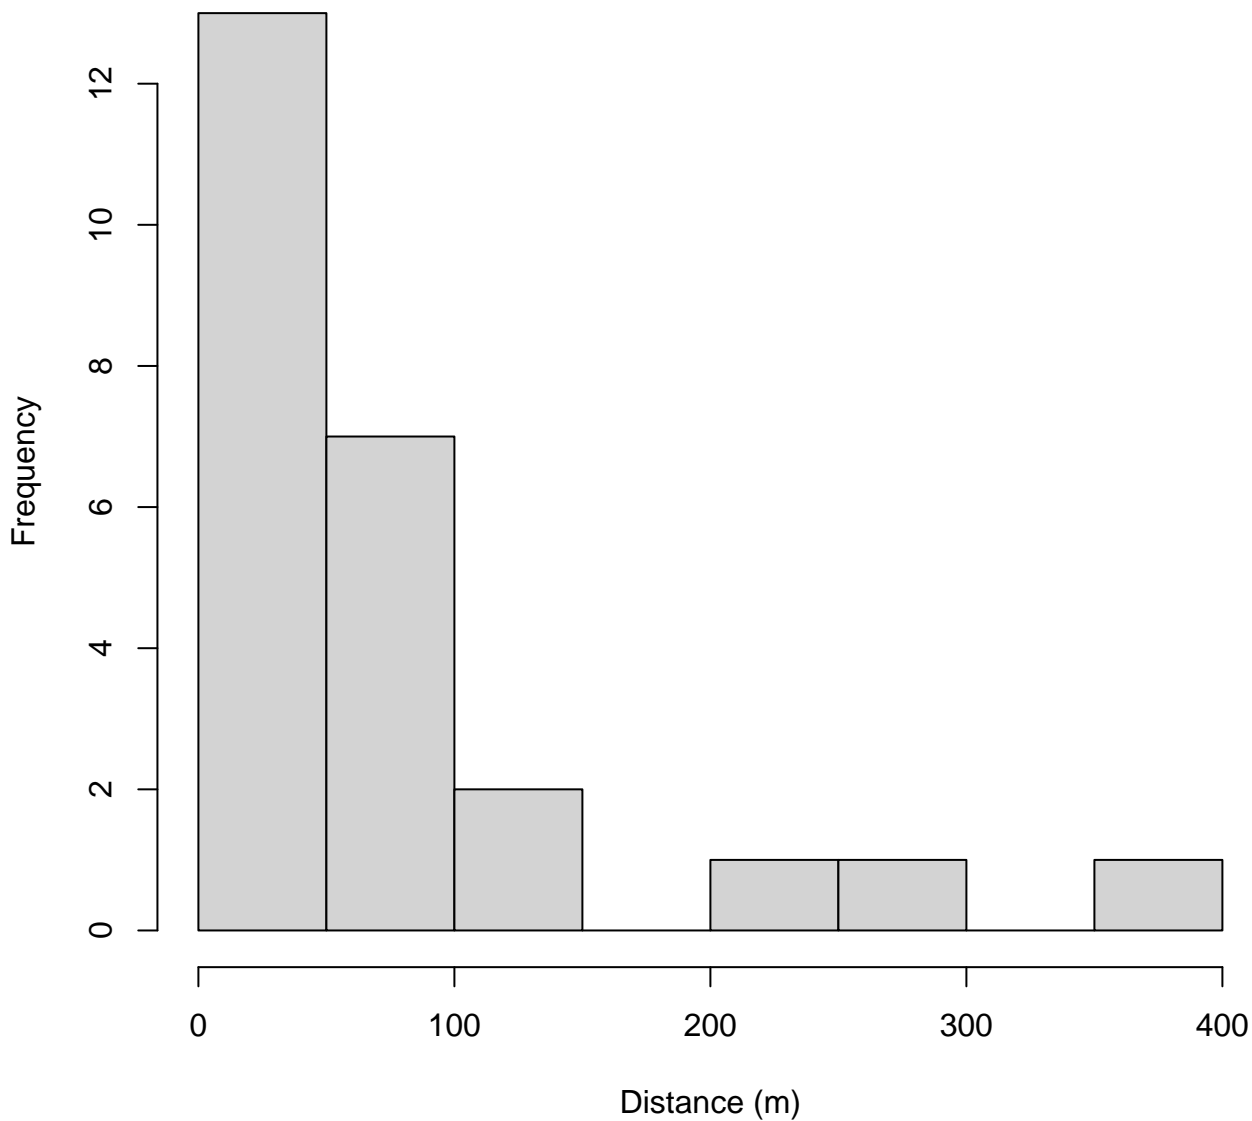

# Amazona aestiva – Pantanal – Brazil

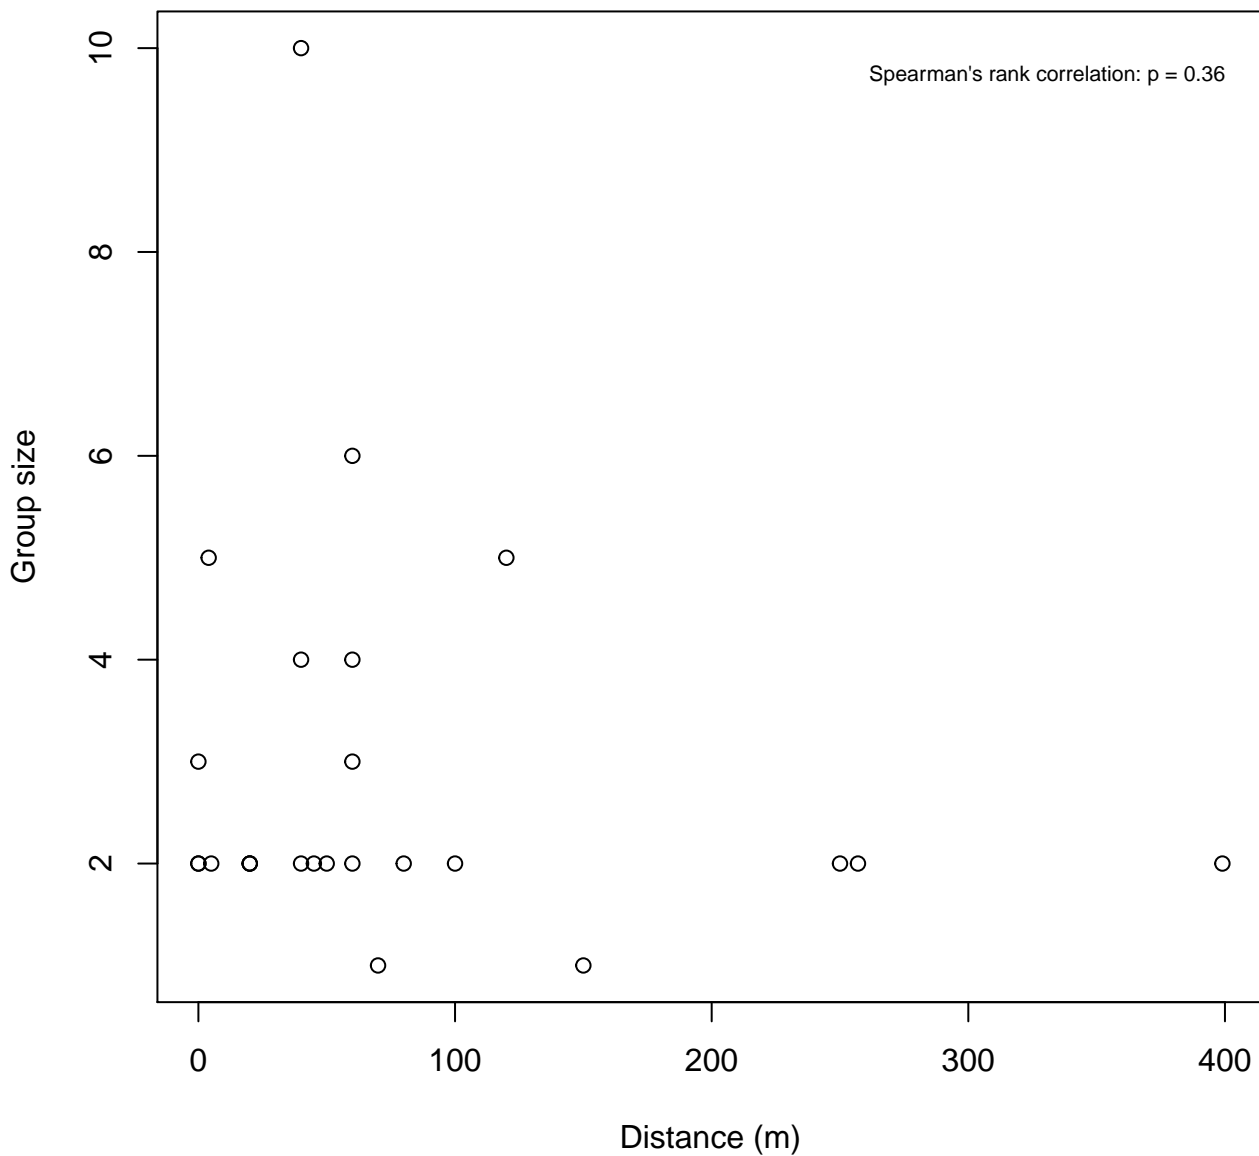

Amazona aestiva – Pantanal – Brazil (N = 25, key function = hr)

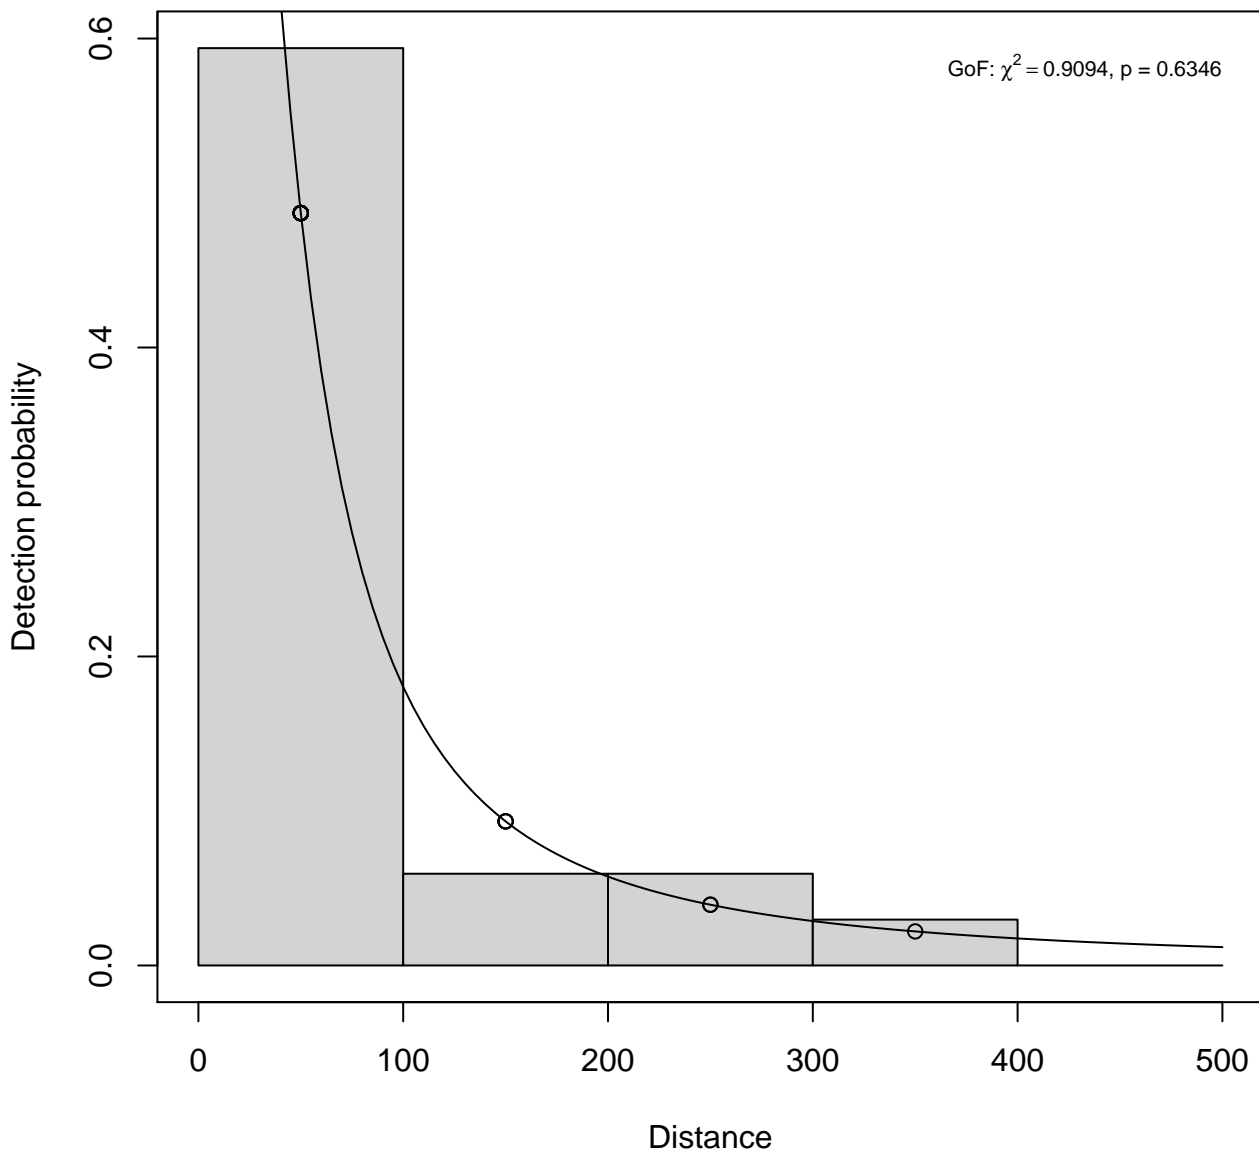

Amazona aestiva – Pantanal – Brazil (N = 25, key function = hr)

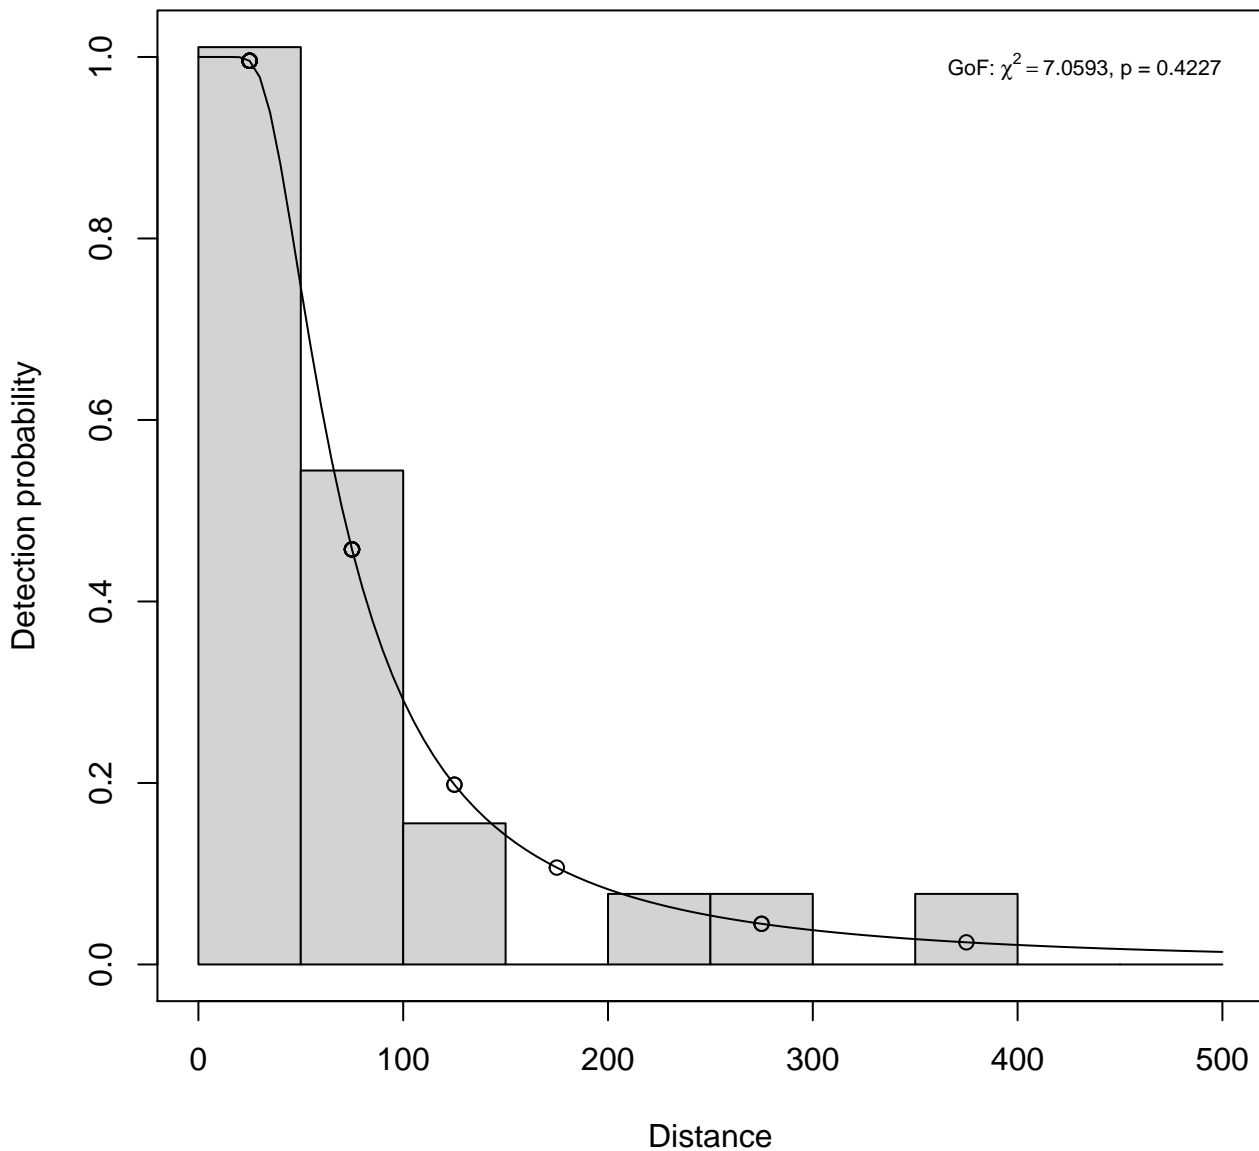

Amazona aestiva – Pantanal – Brazil (N = 25, key function = hr)

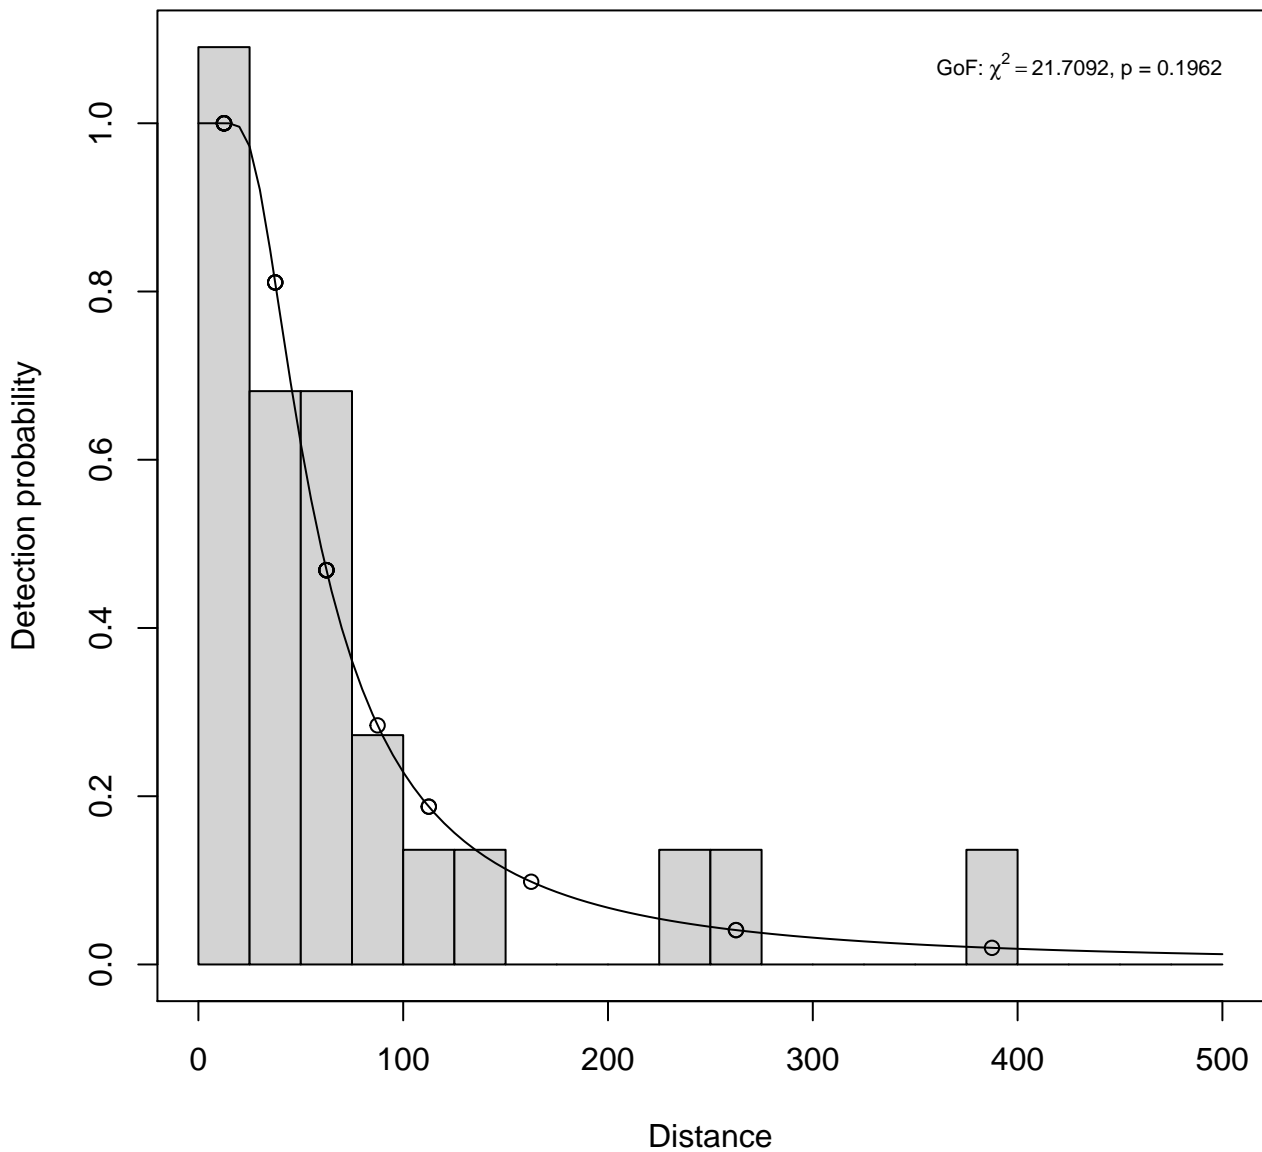

Supplement: s1 [file s1]
