# Supplementary material
Source: MDPI journal article supplement (https://www.mdpi.com/1424-2818/13/7/300)

# Myiopsitta monachus – Humid Pampas – Argentina

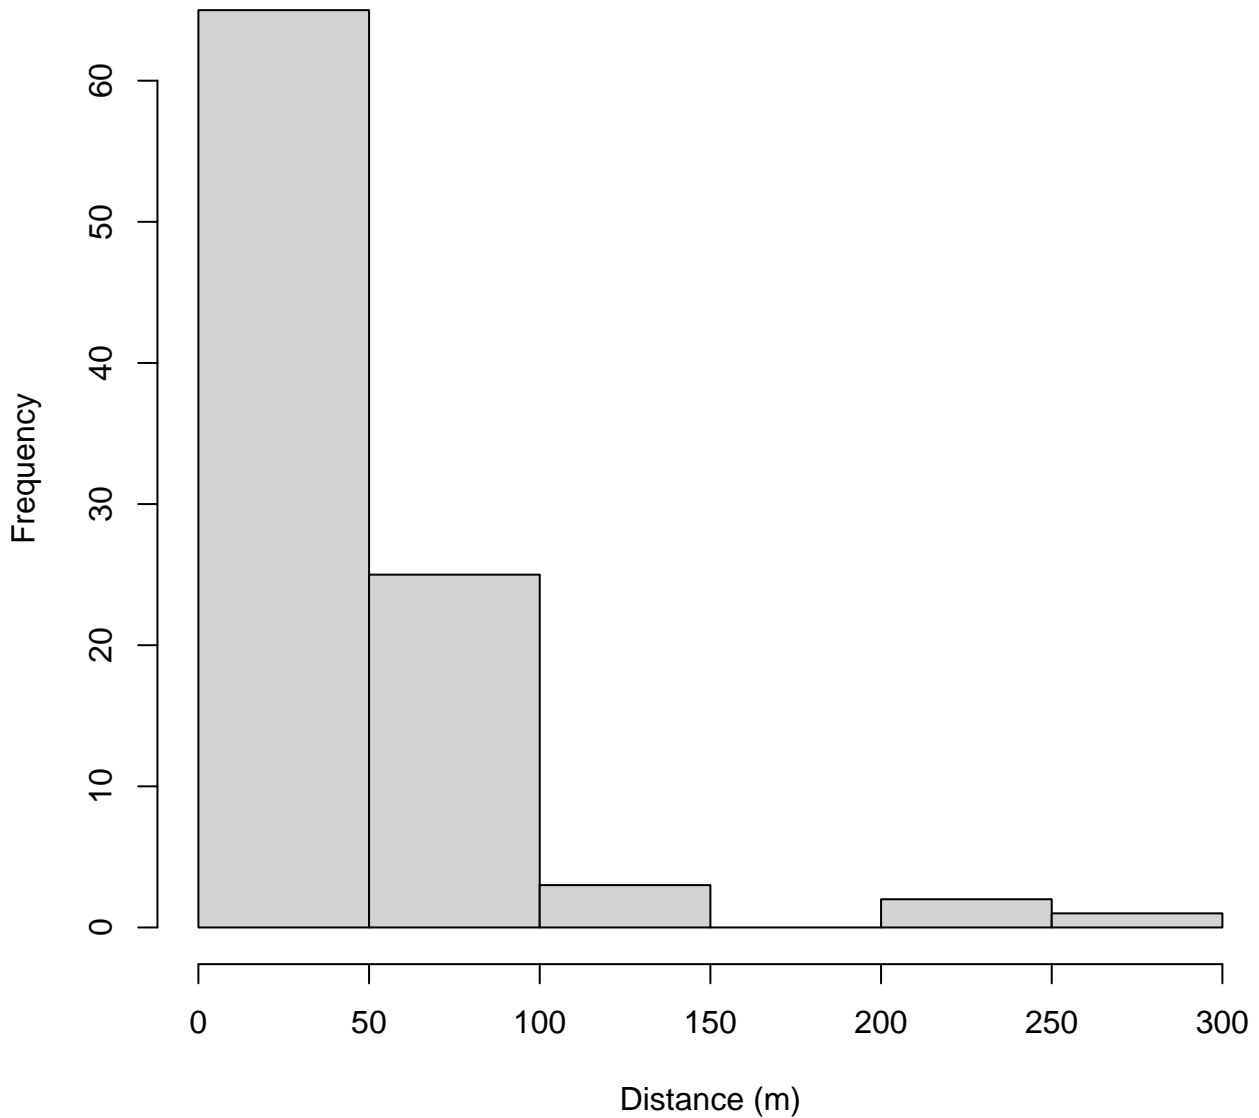

# Myiopsitta monachus – Humid Pampas – Argentina

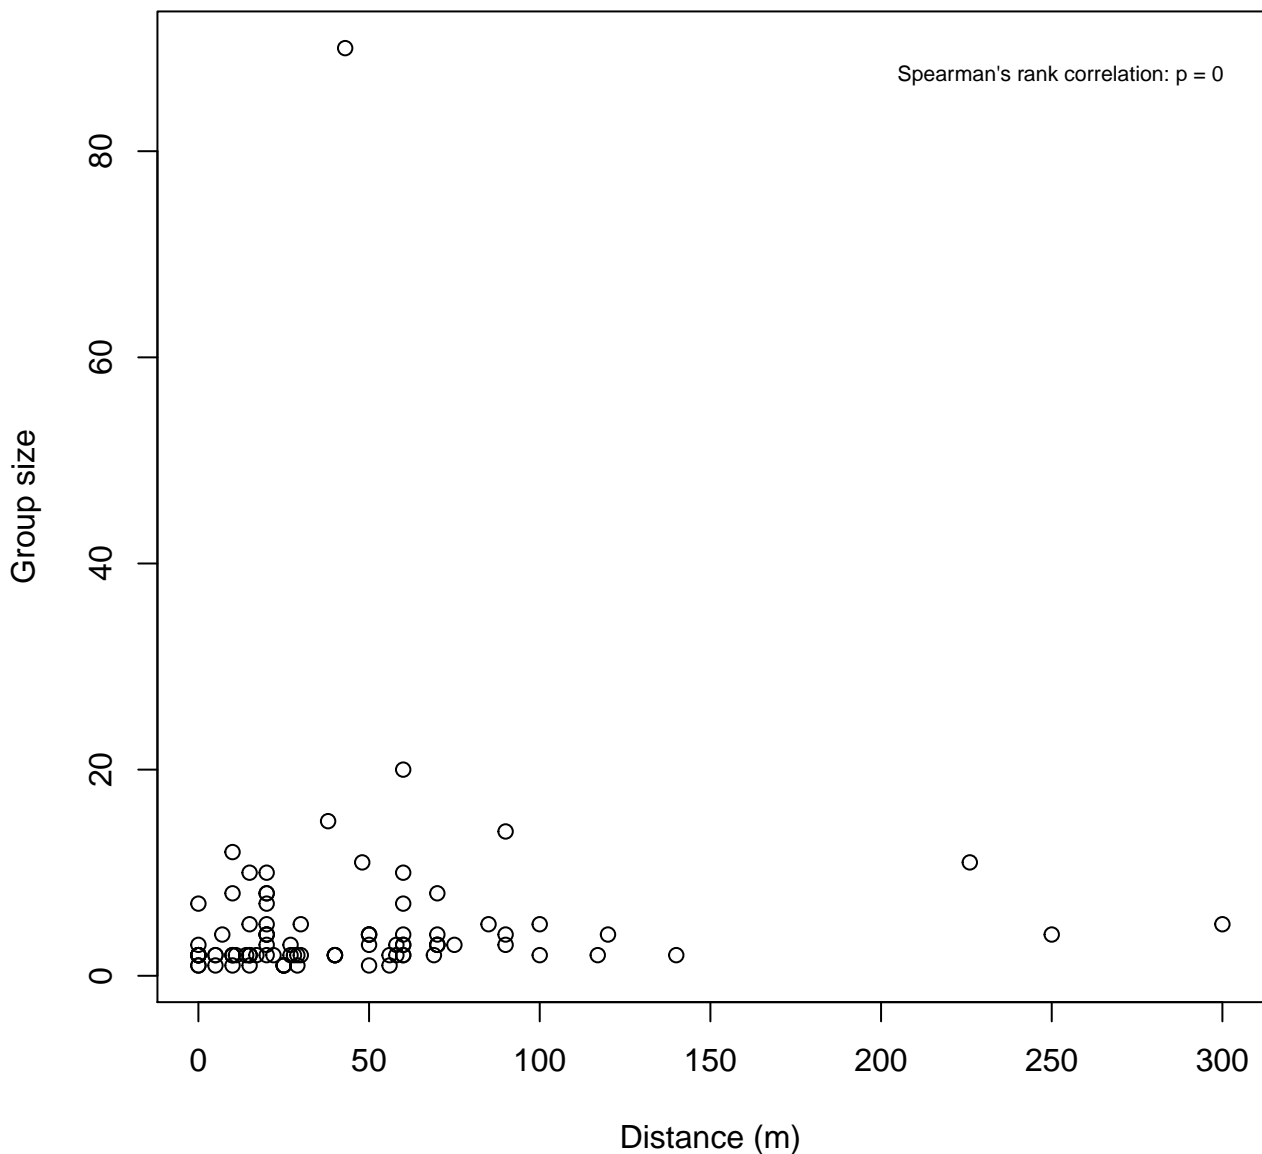

Myiopsitta monachus – Humid Pampas – Argentina (N = 96, key function = hr)

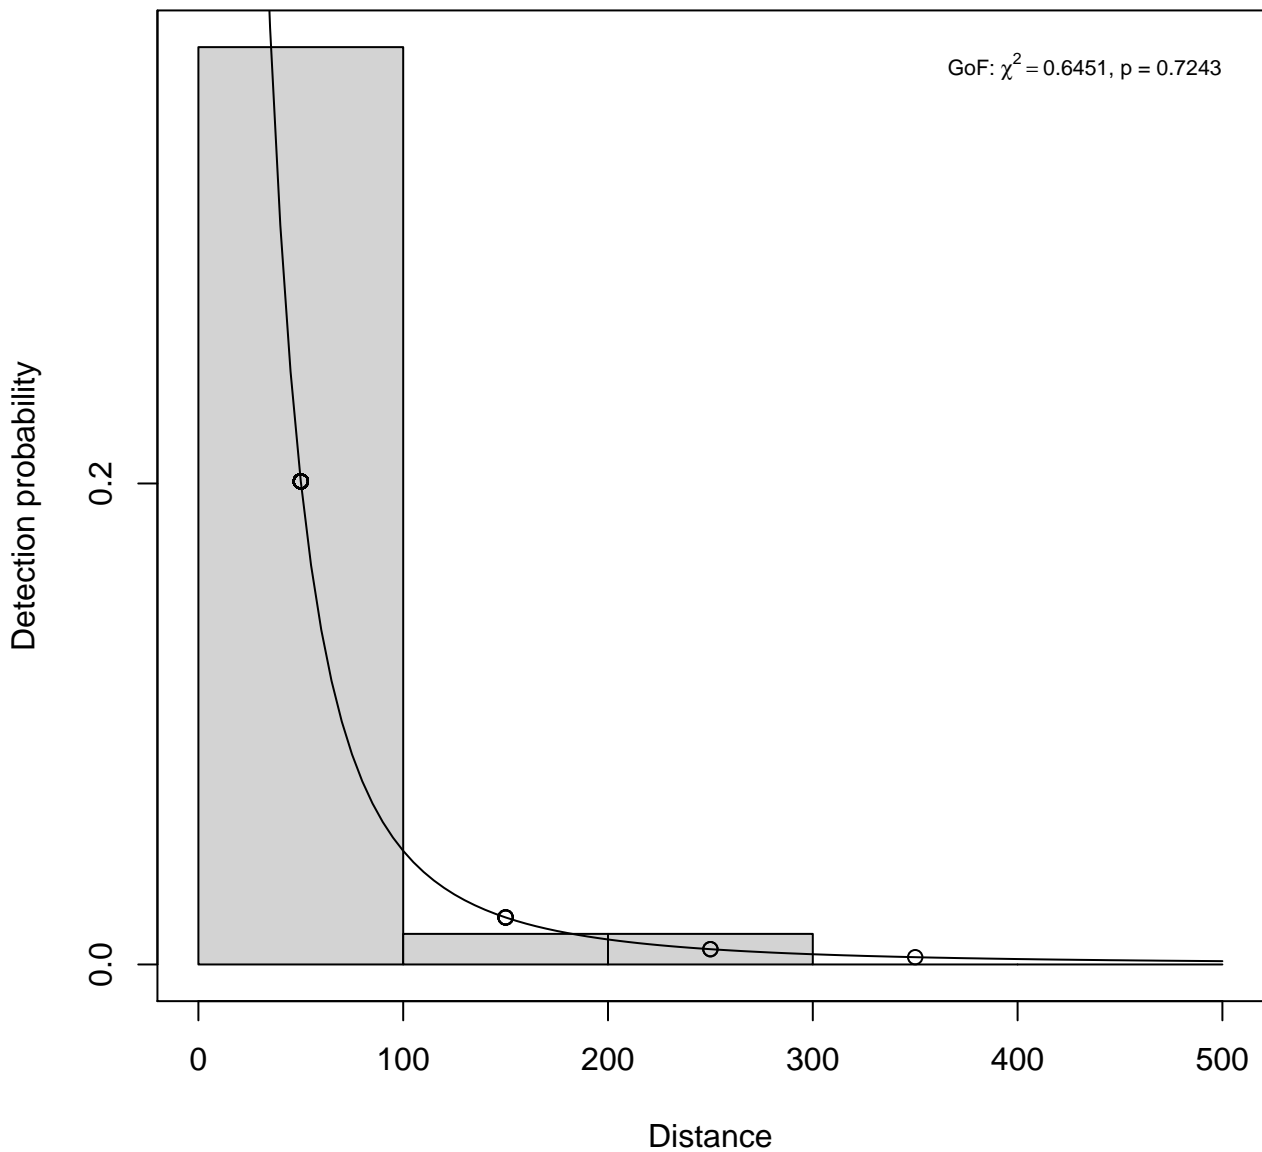

Myiopsitta monachus – Humid Pampas – Argentina (N = 96, key function = hr)

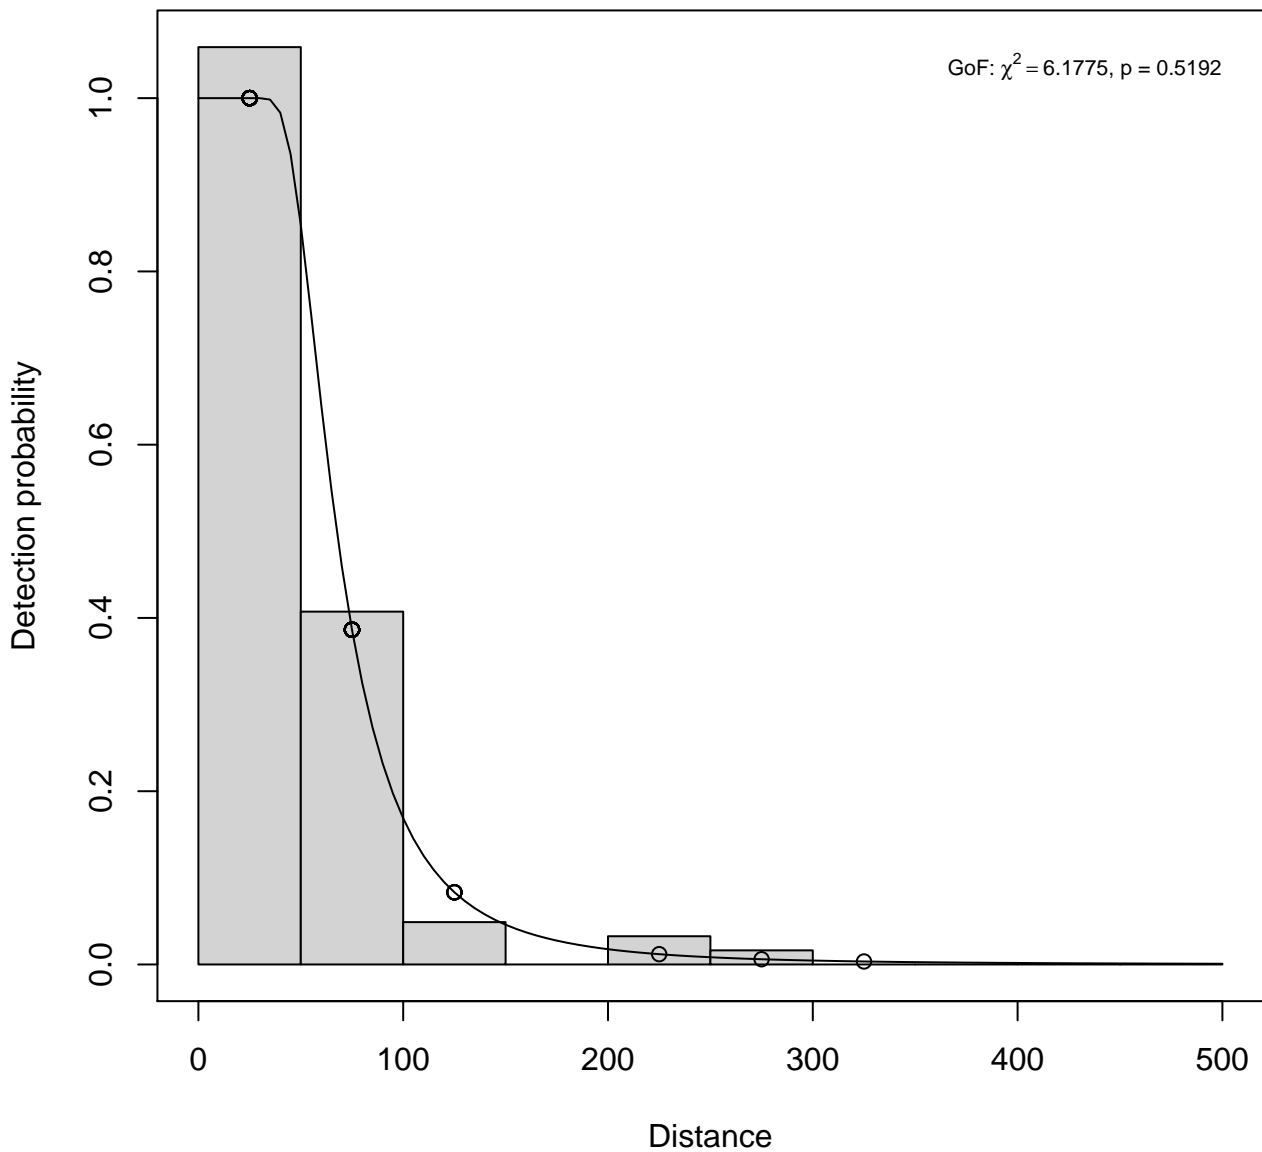

Myiopsitta monachus – Humid Pampas – Argentina (N = 96, key function = hn)

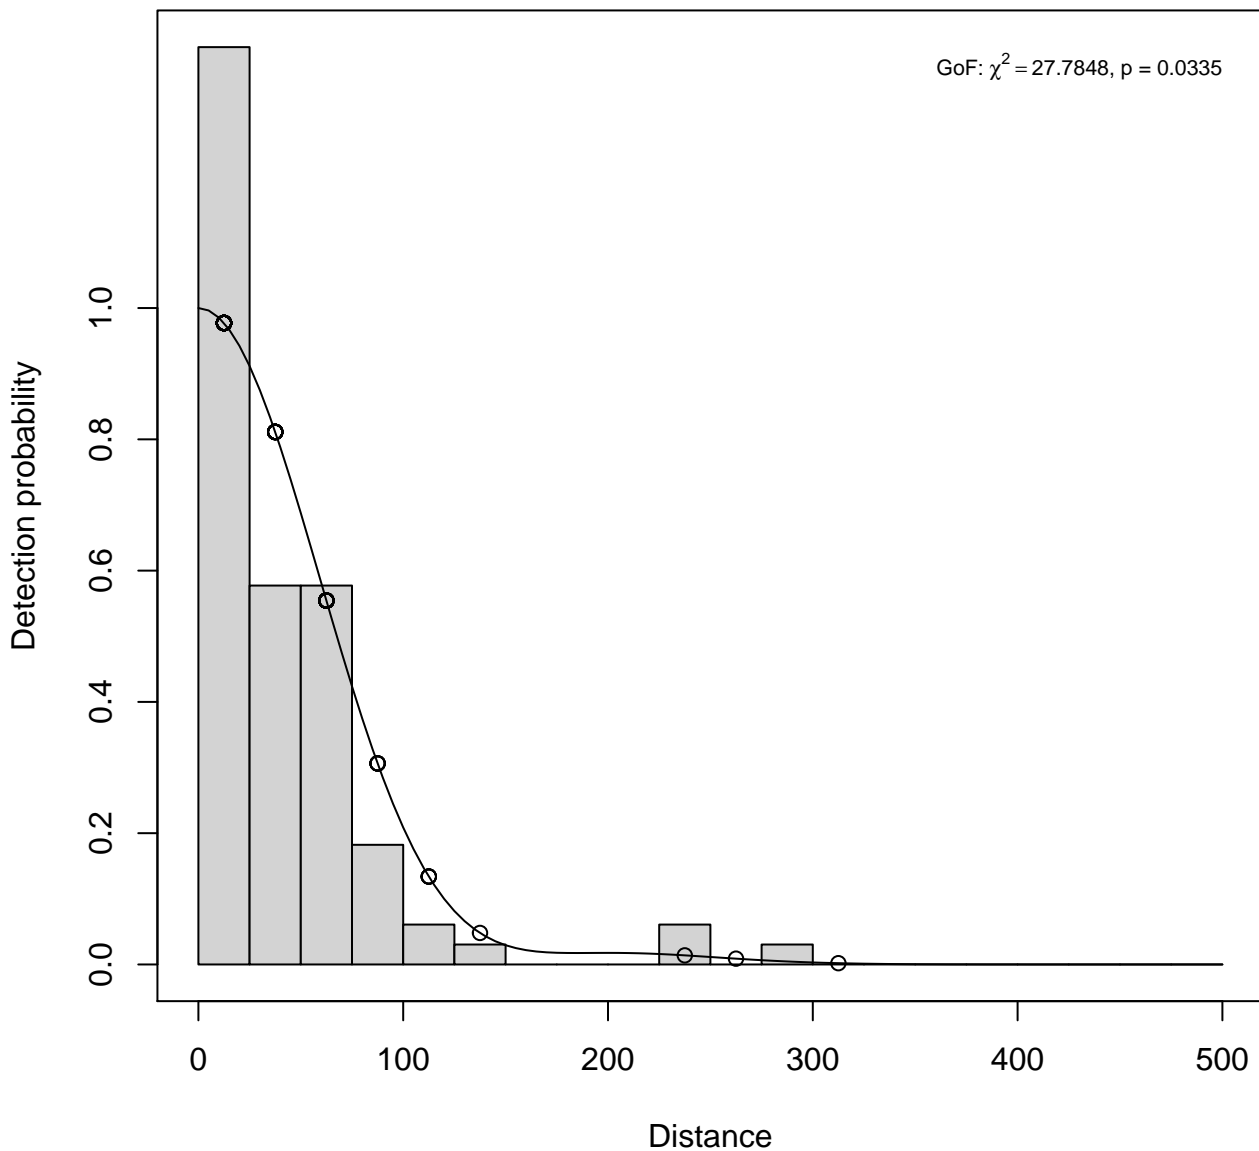

Supplement: s1 [file s1]
