# Supplementary material
Source: MDPI journal article supplement (https://www.mdpi.com/1424-2818/13/7/300)

# **Ara ararauna – Madeira–Tapajos moist forests – Brazil**

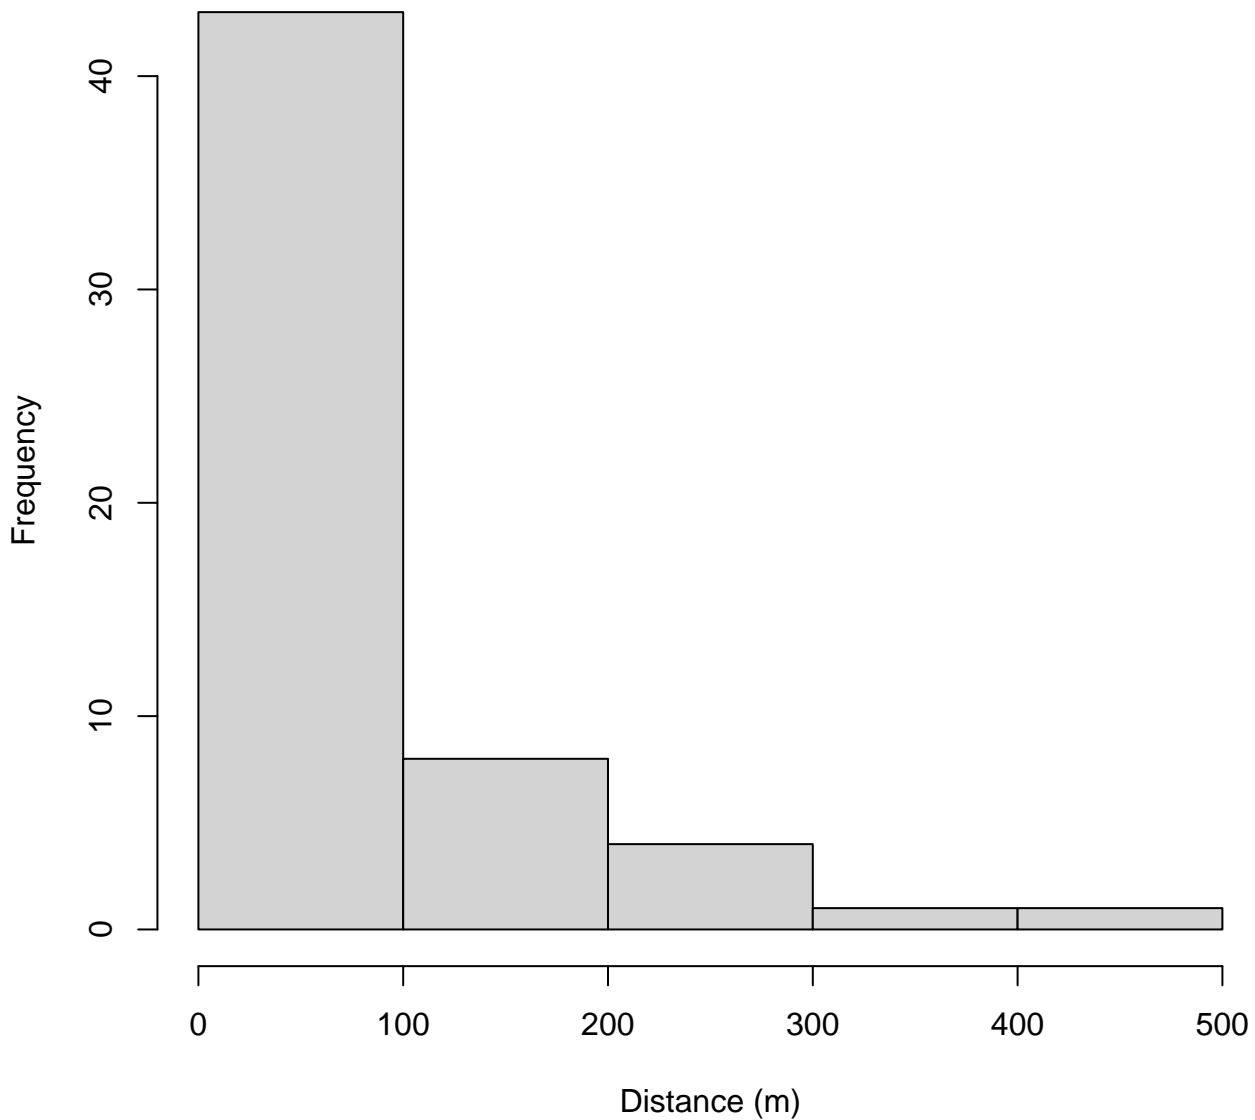

# Ara ararauna – Madeira–Tapajos moist forests – Brazil

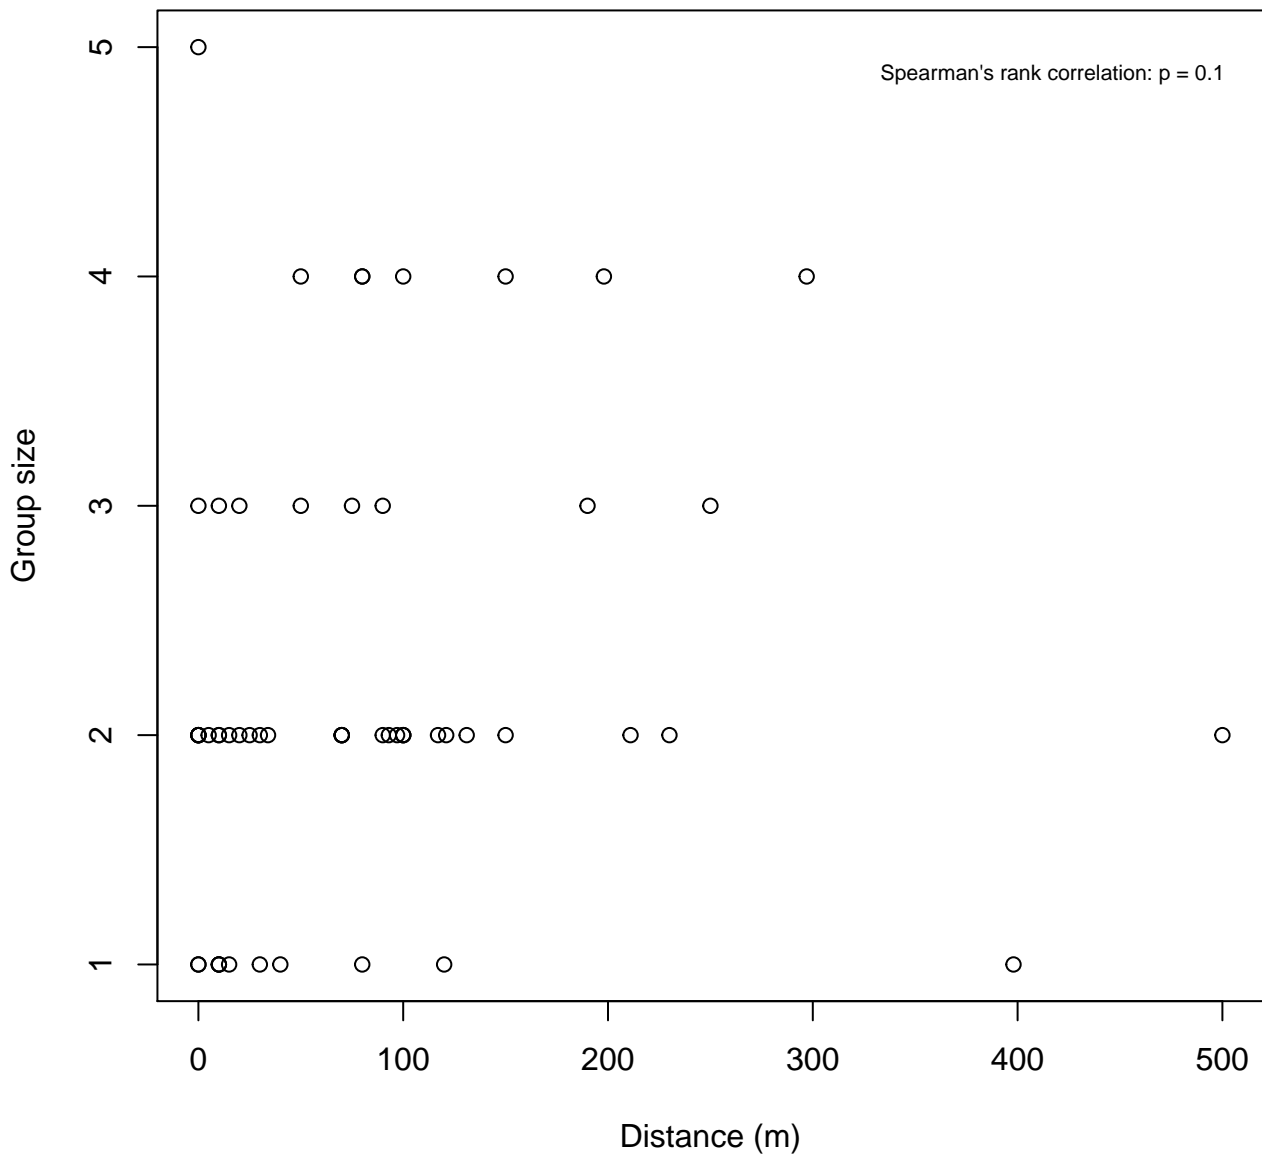

Ara ararauna – Madeira–Tapajos moist forests – Brazil (N = 57, key function = hr)

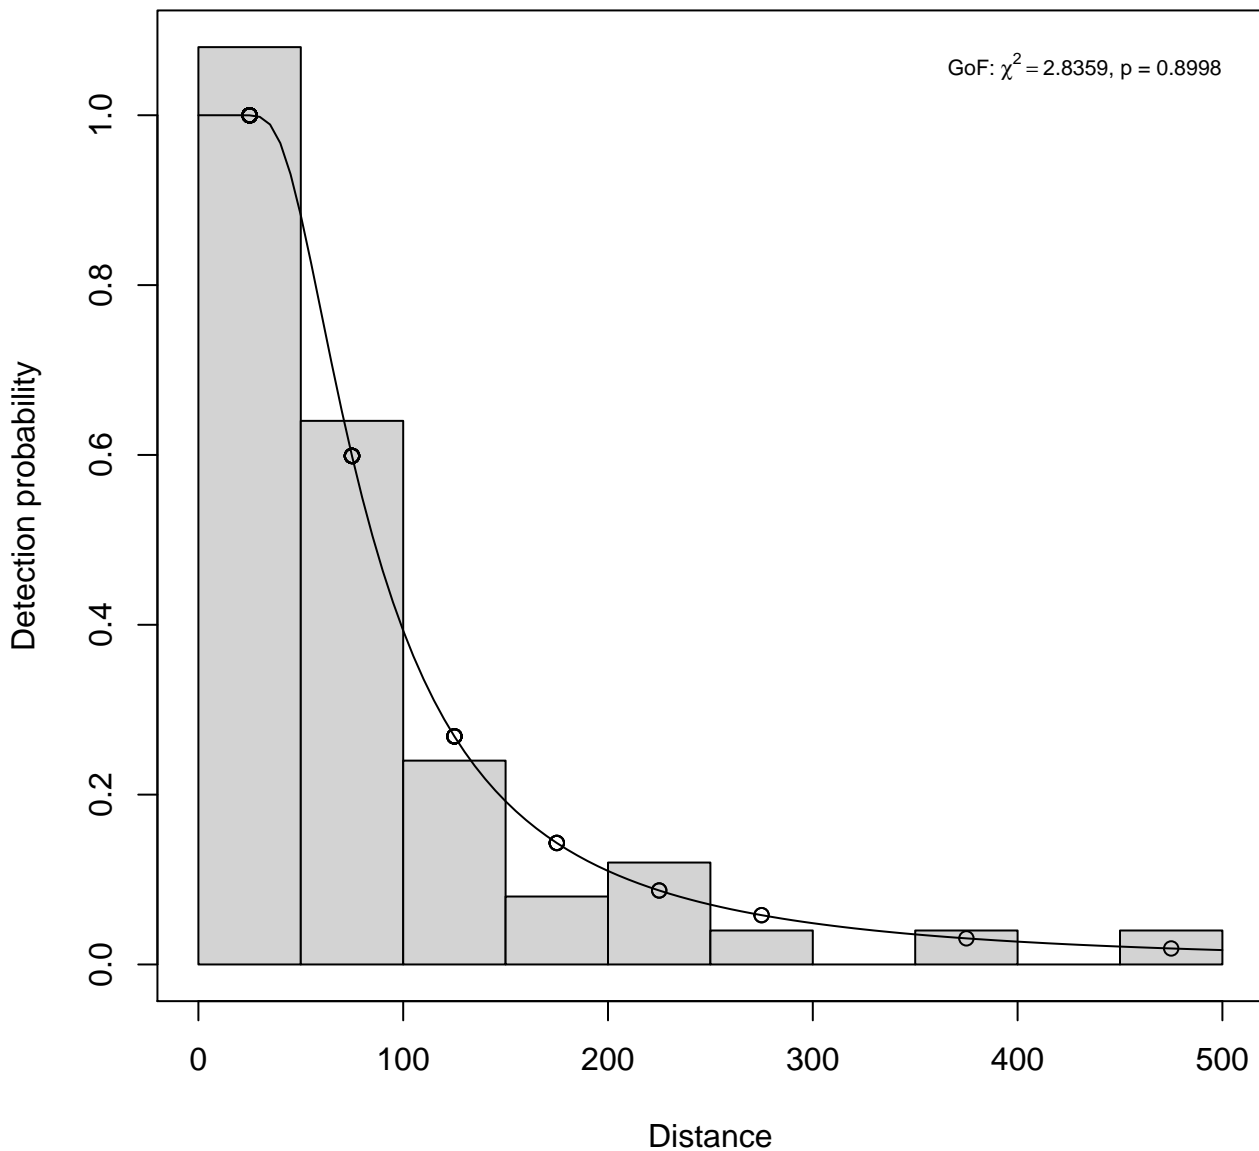

*Ara ararauna* – Madeira–Tapajos moist forests – Brazil (N = 57, key function = hr)

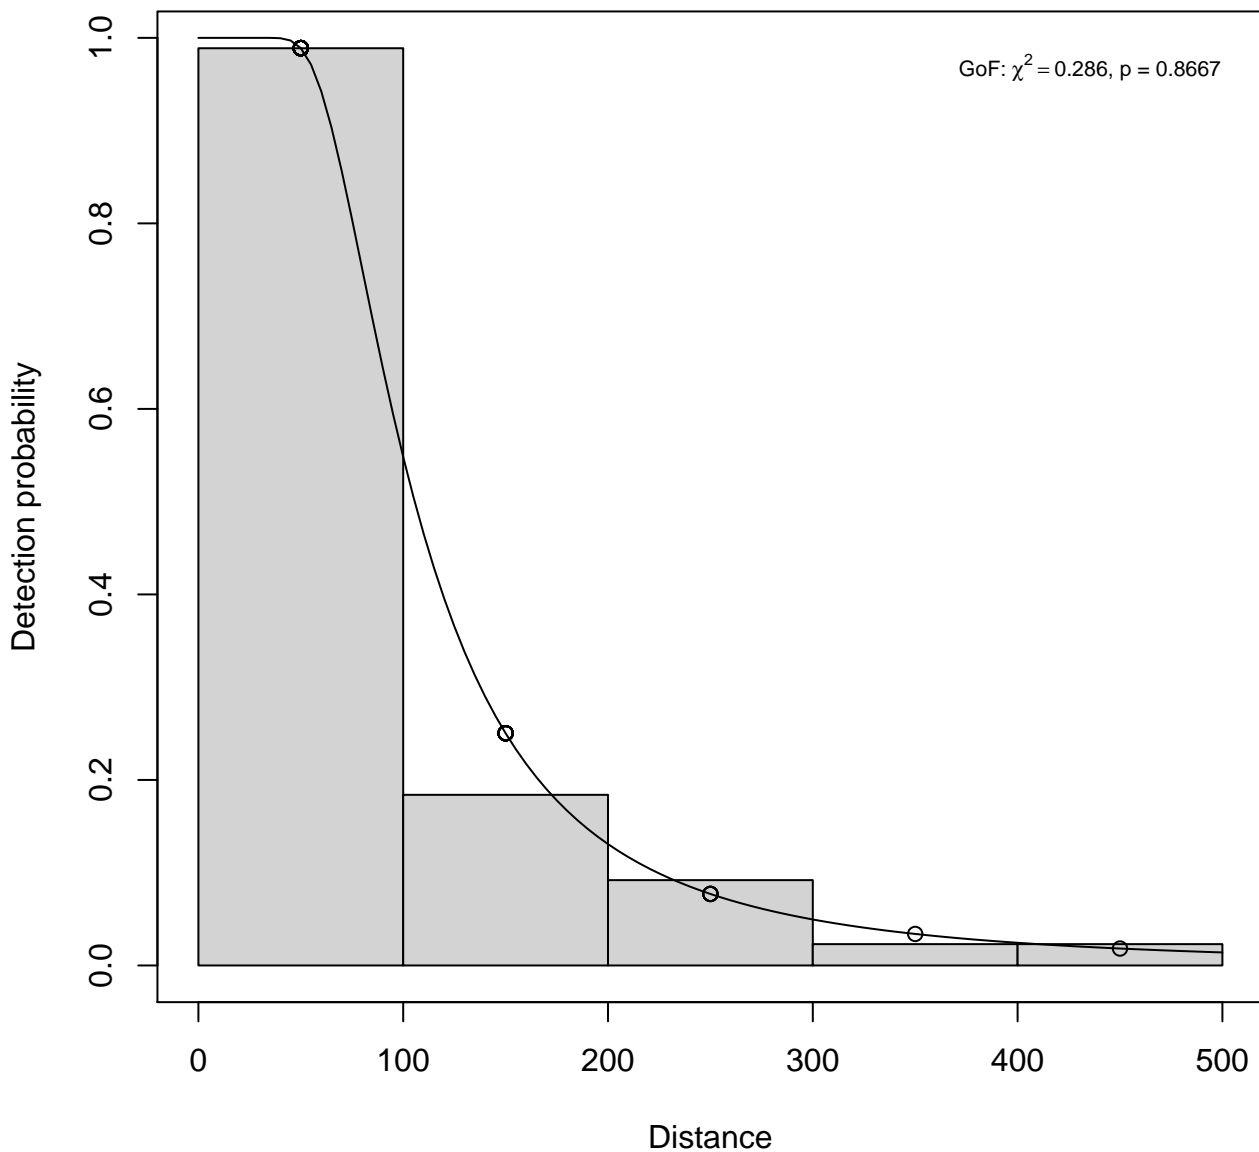

Ara ararauna – Madeira–Tapajos moist forests – Brazil (N = 57, key function = hr)

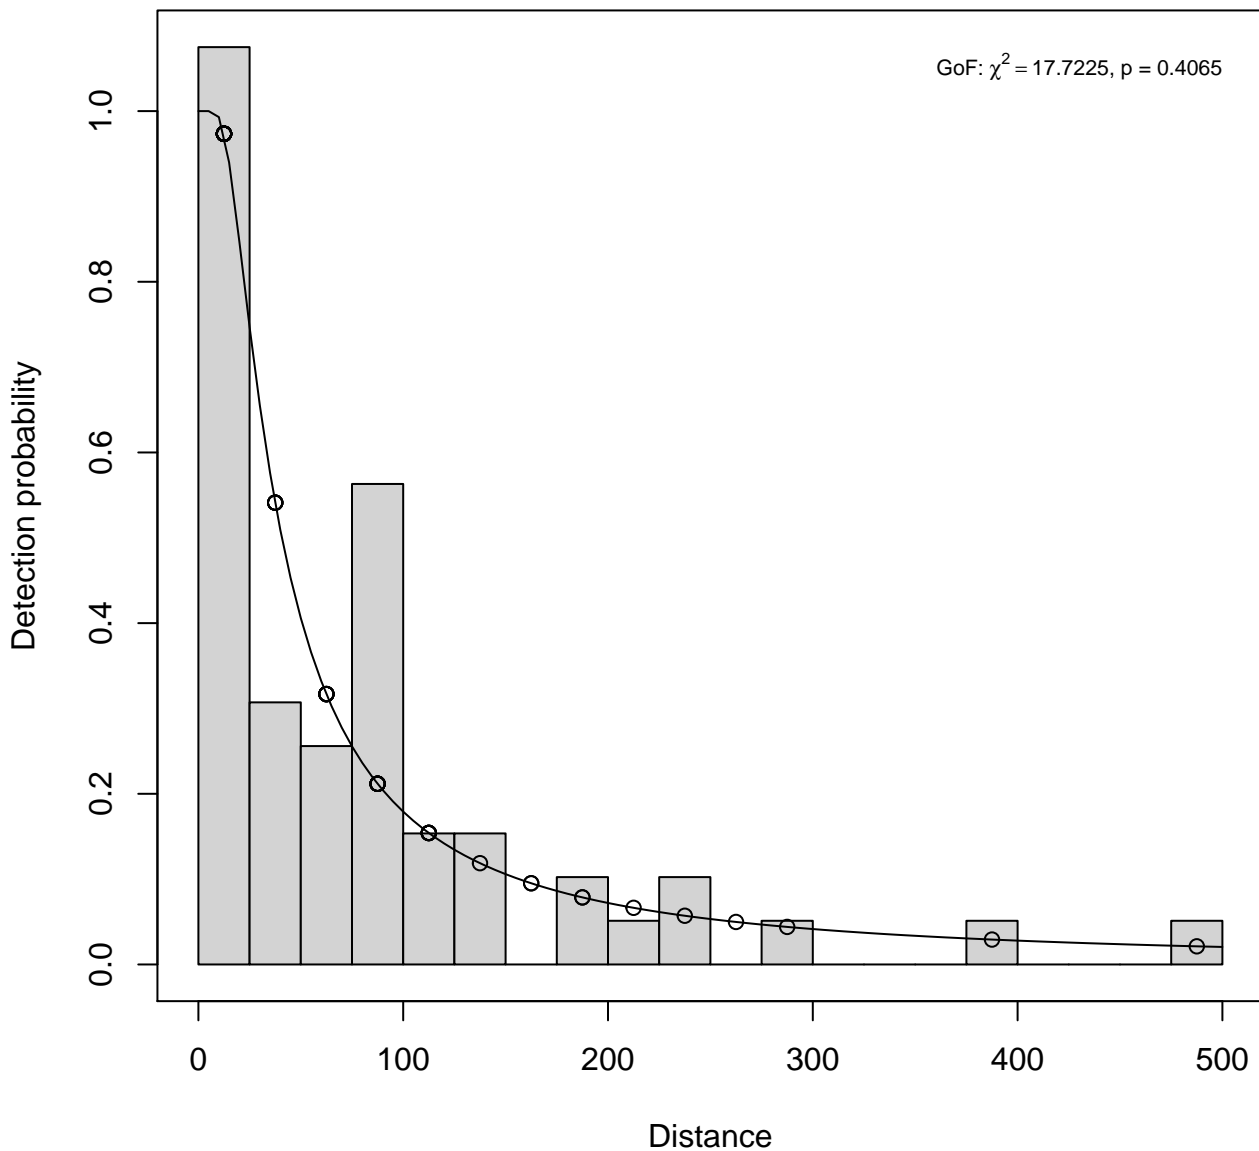

Supplement: s1 [file s1]
