# Supplementary material
Source: MDPI journal article supplement (https://www.mdpi.com/1424-2818/13/7/300)

# **Amazona autumnalis – Isthmian–Atlantic moist forests – Panama**

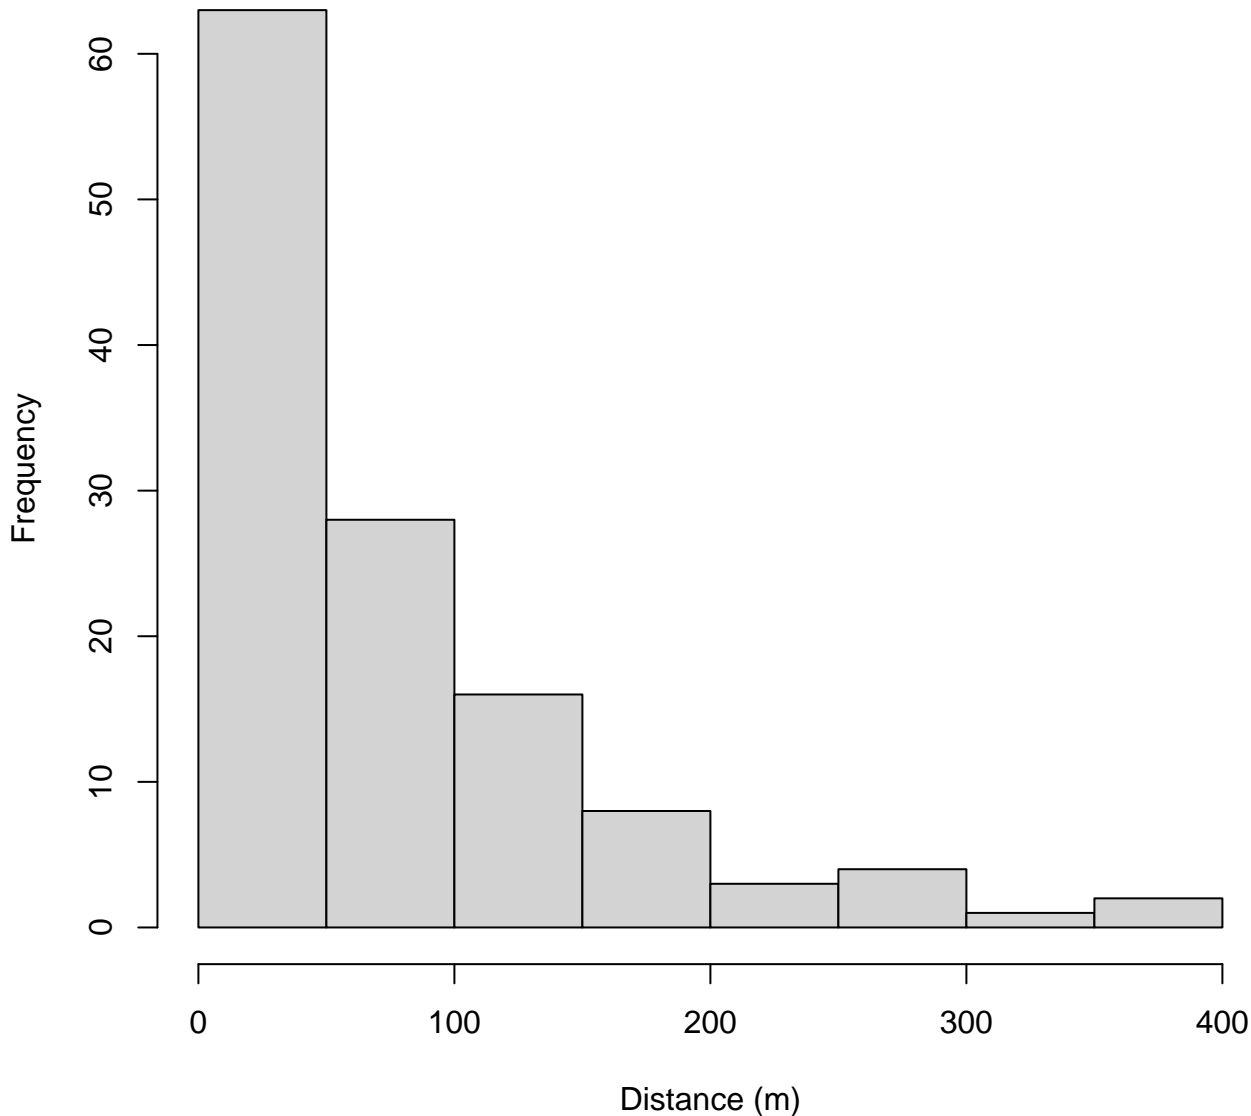

# Amazona autumnalis – Isthmian–Atlantic moist forests – Panama

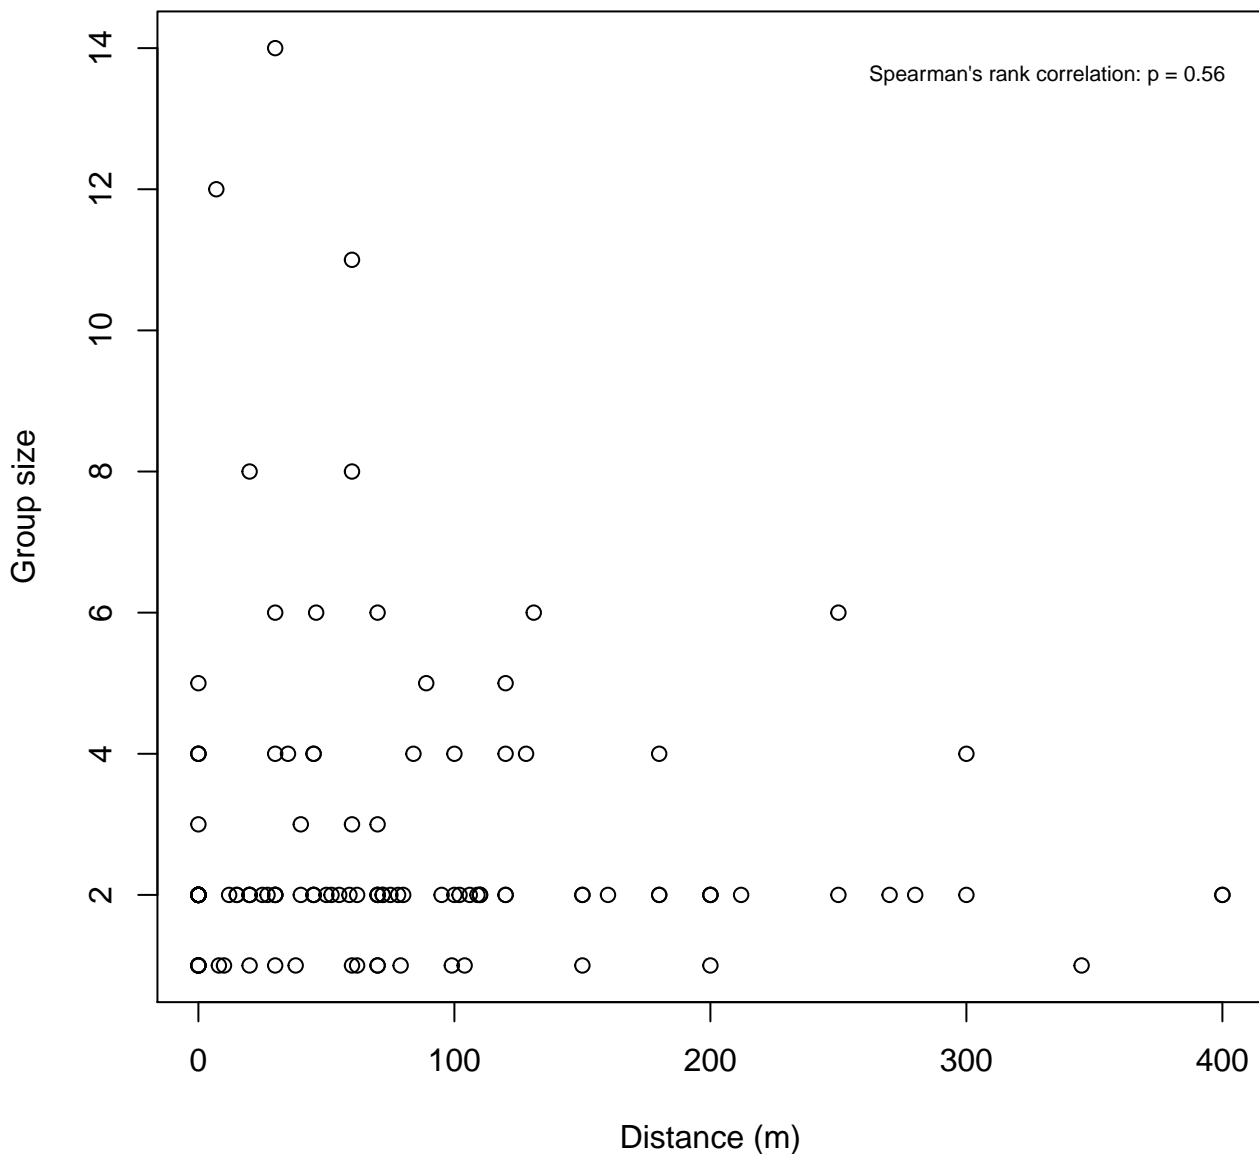

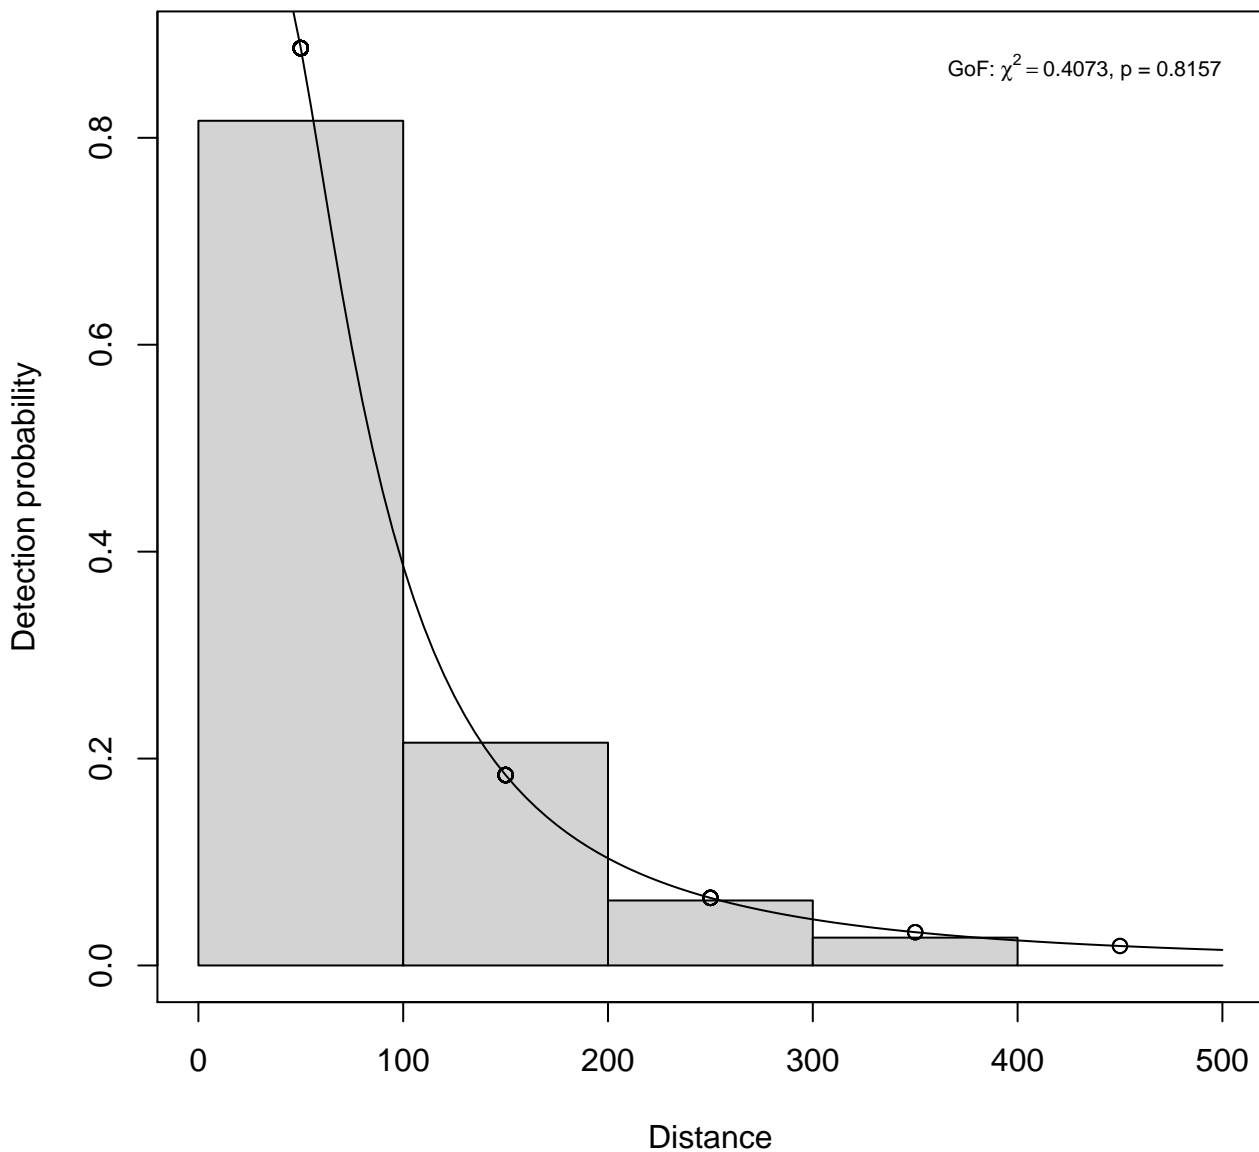

*Amazona autumnalis* – Isthmian–Atlantic moist forests – Panama (N = 125, key function = hr)

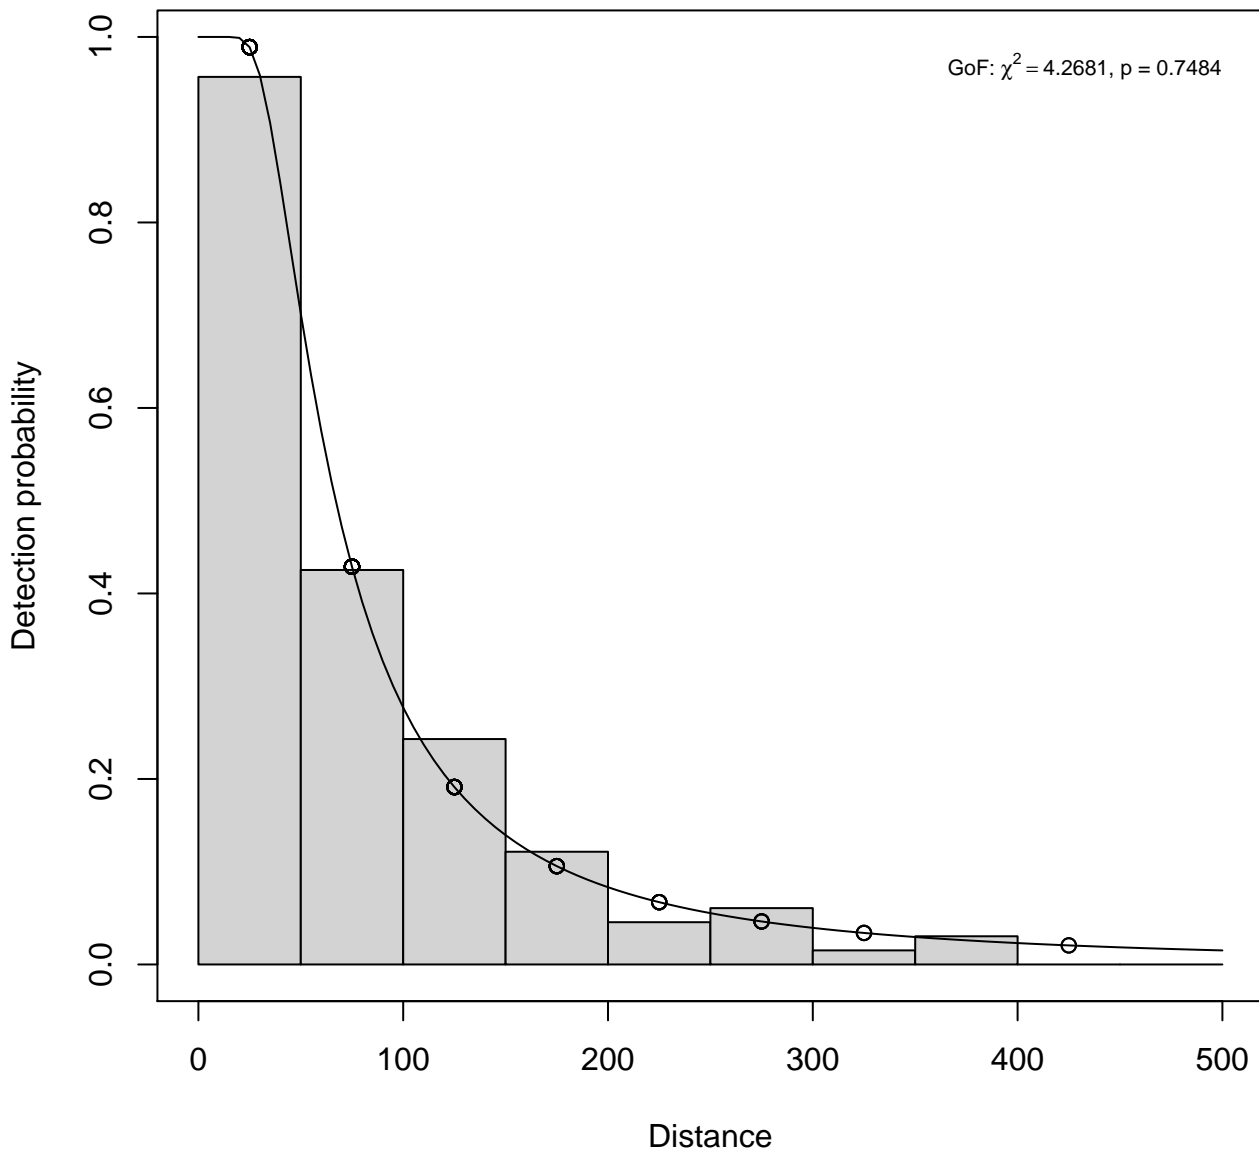

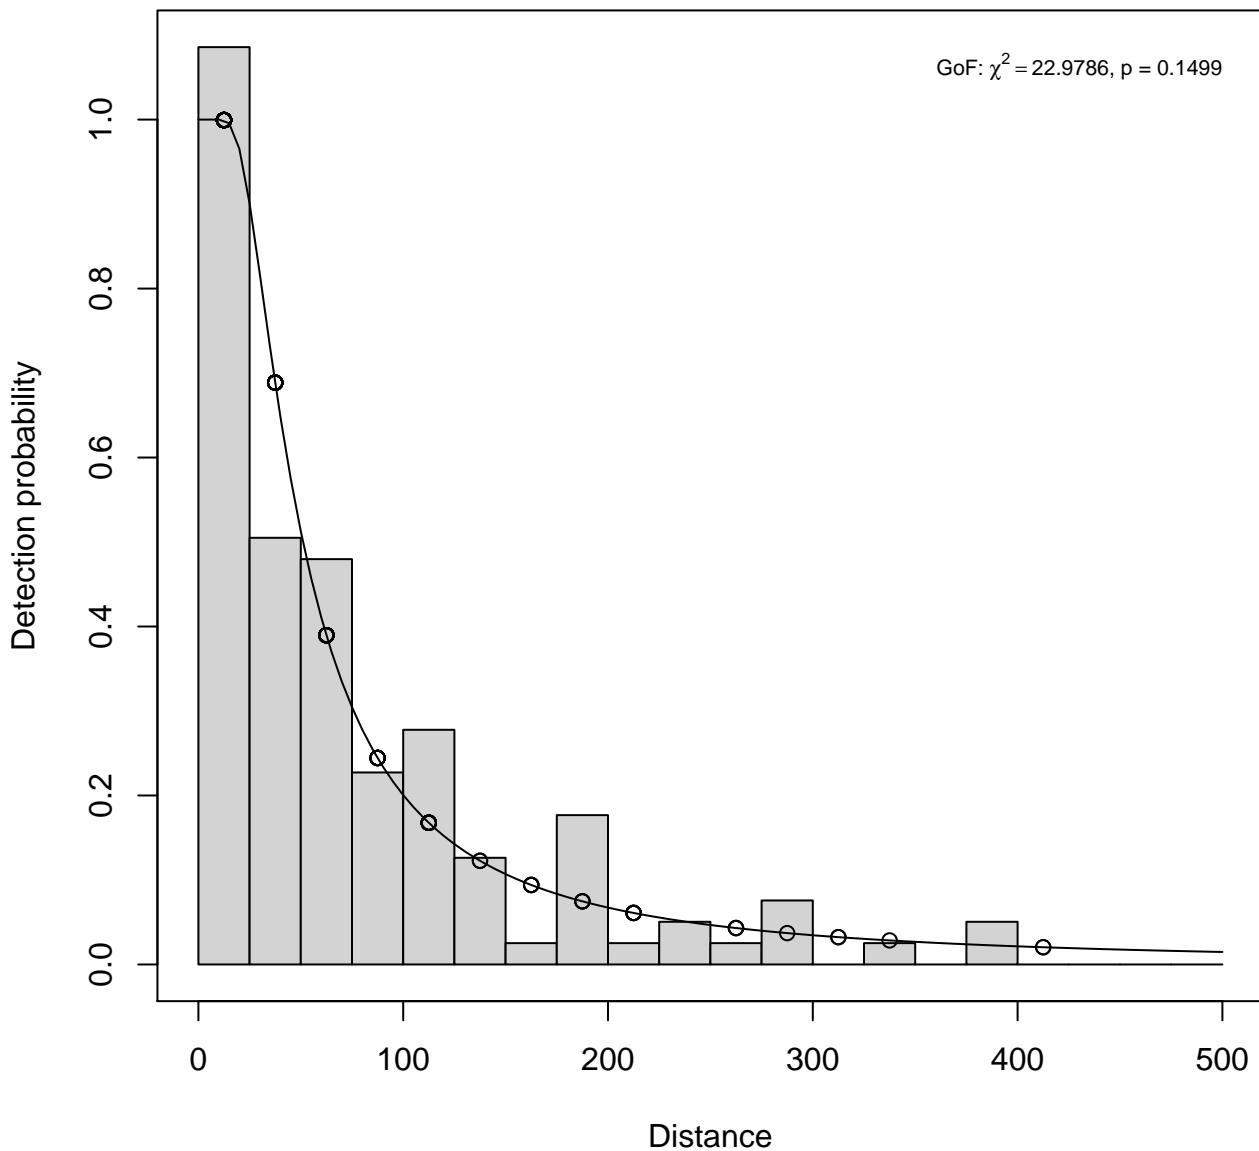

Supplement: s1 [file s1]
