# Supplementary material
Source: MDPI journal article supplement (https://www.mdpi.com/1424-2818/13/7/300)

# **Brotogeris chiriri – Bolivian montane dry forests – Bolivia**

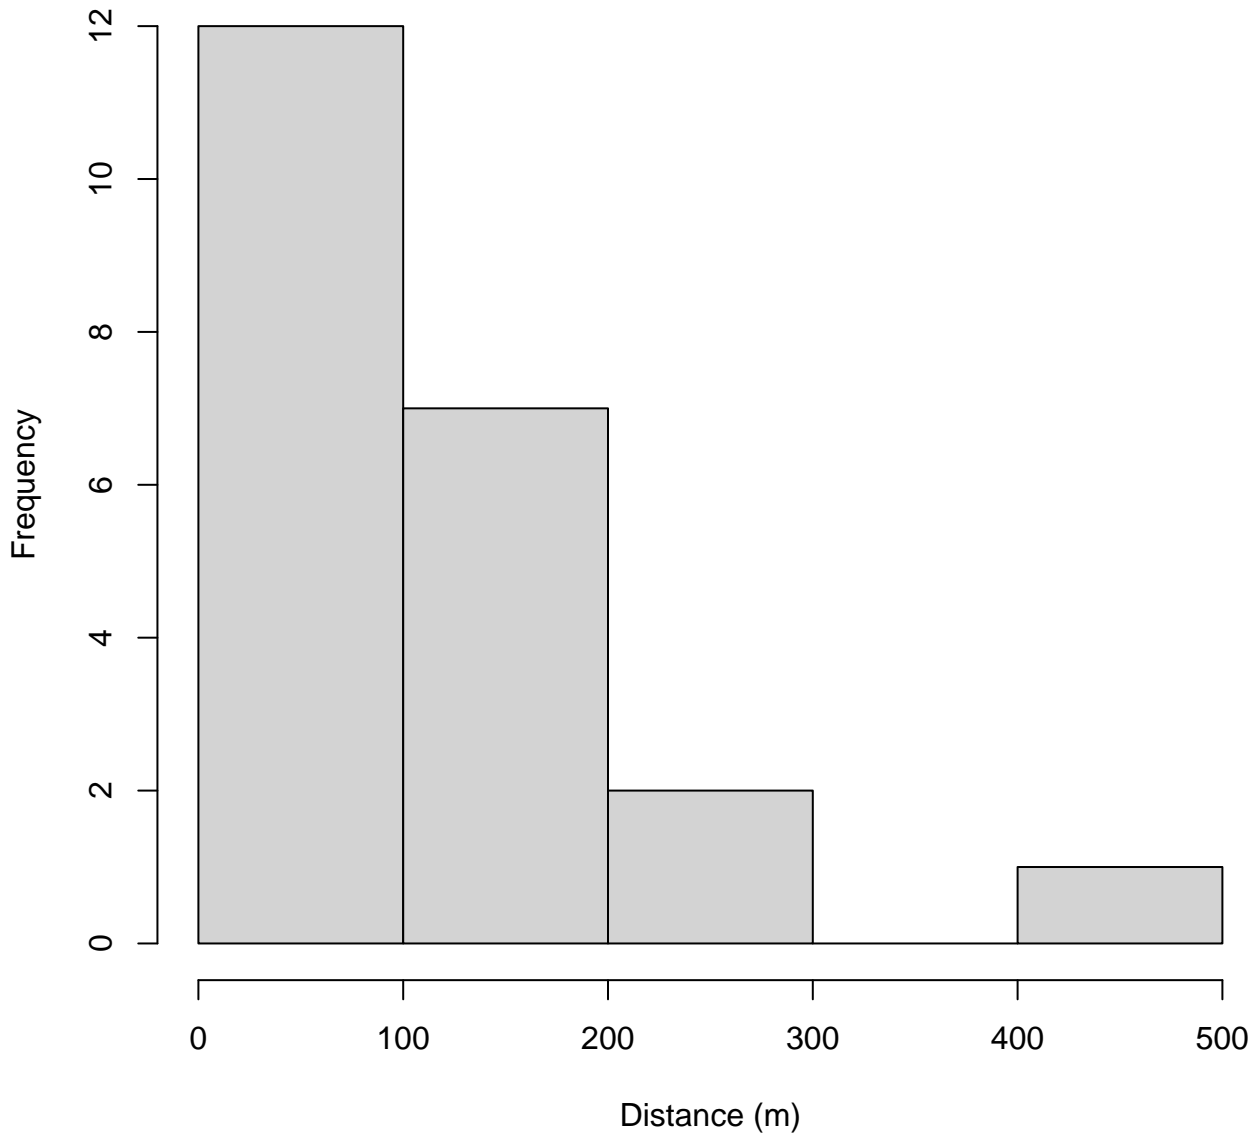

# **Brotogetis chiriri – Bolivian montane dry forests – Bolivia**

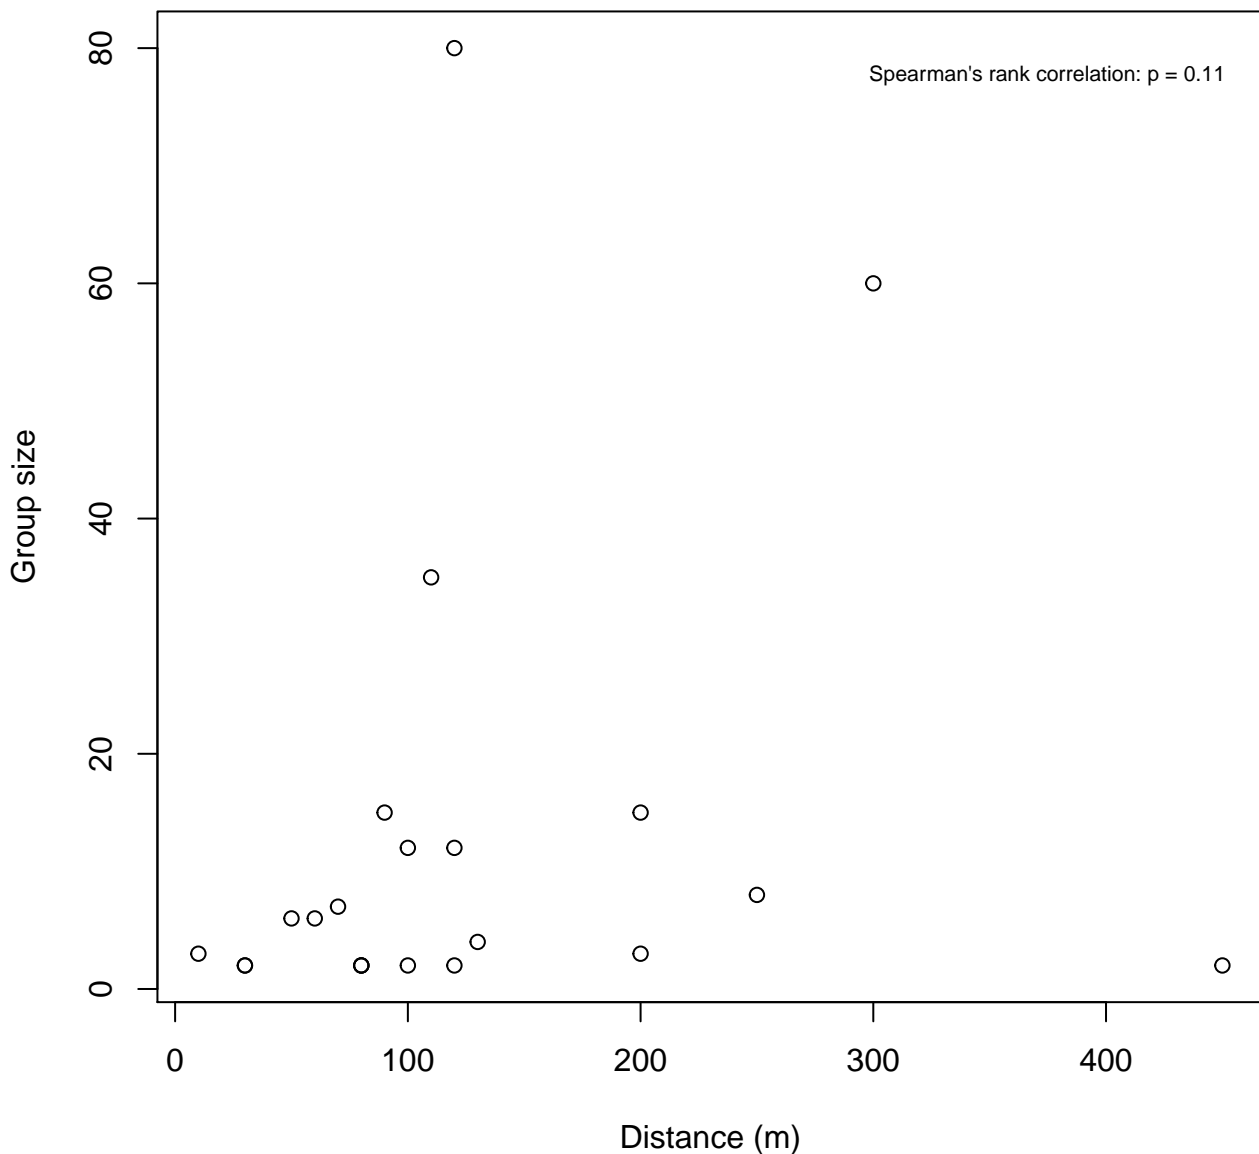

Brotogetis chiriri – Bolivian montane dry forests – Bolivia (N = 22, key function = hn)

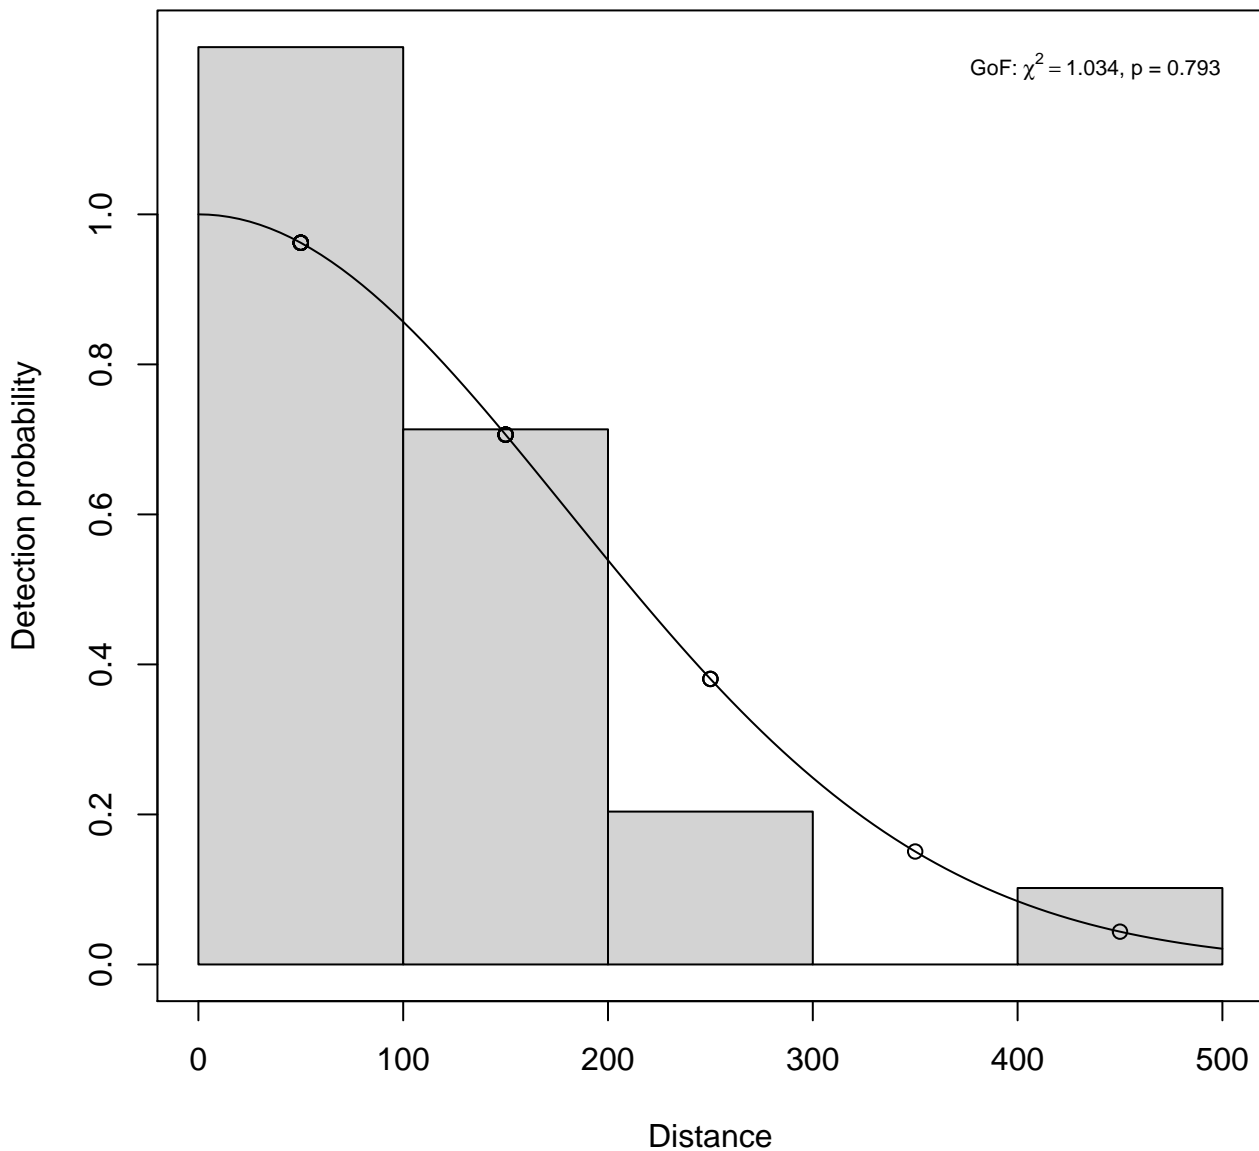

Brotogeris chiriri – Bolivian montane dry forests – Bolivia (N = 22, key function = hr)

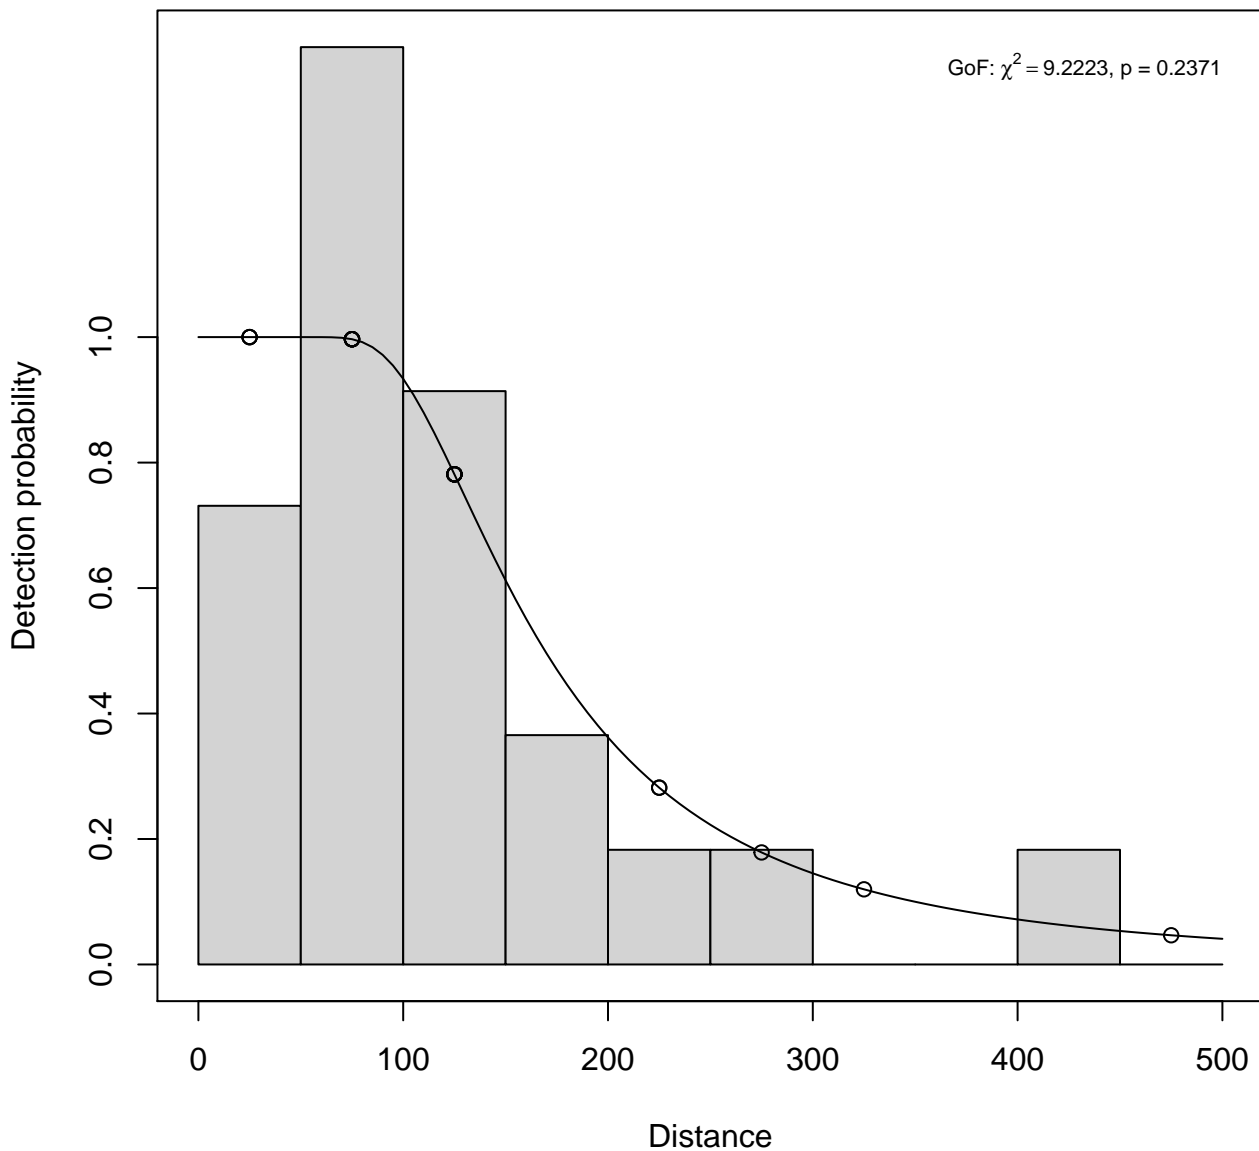

Brotogeris chiriri – Bolivian montane dry forests – Bolivia (N = 22, key function = hr)

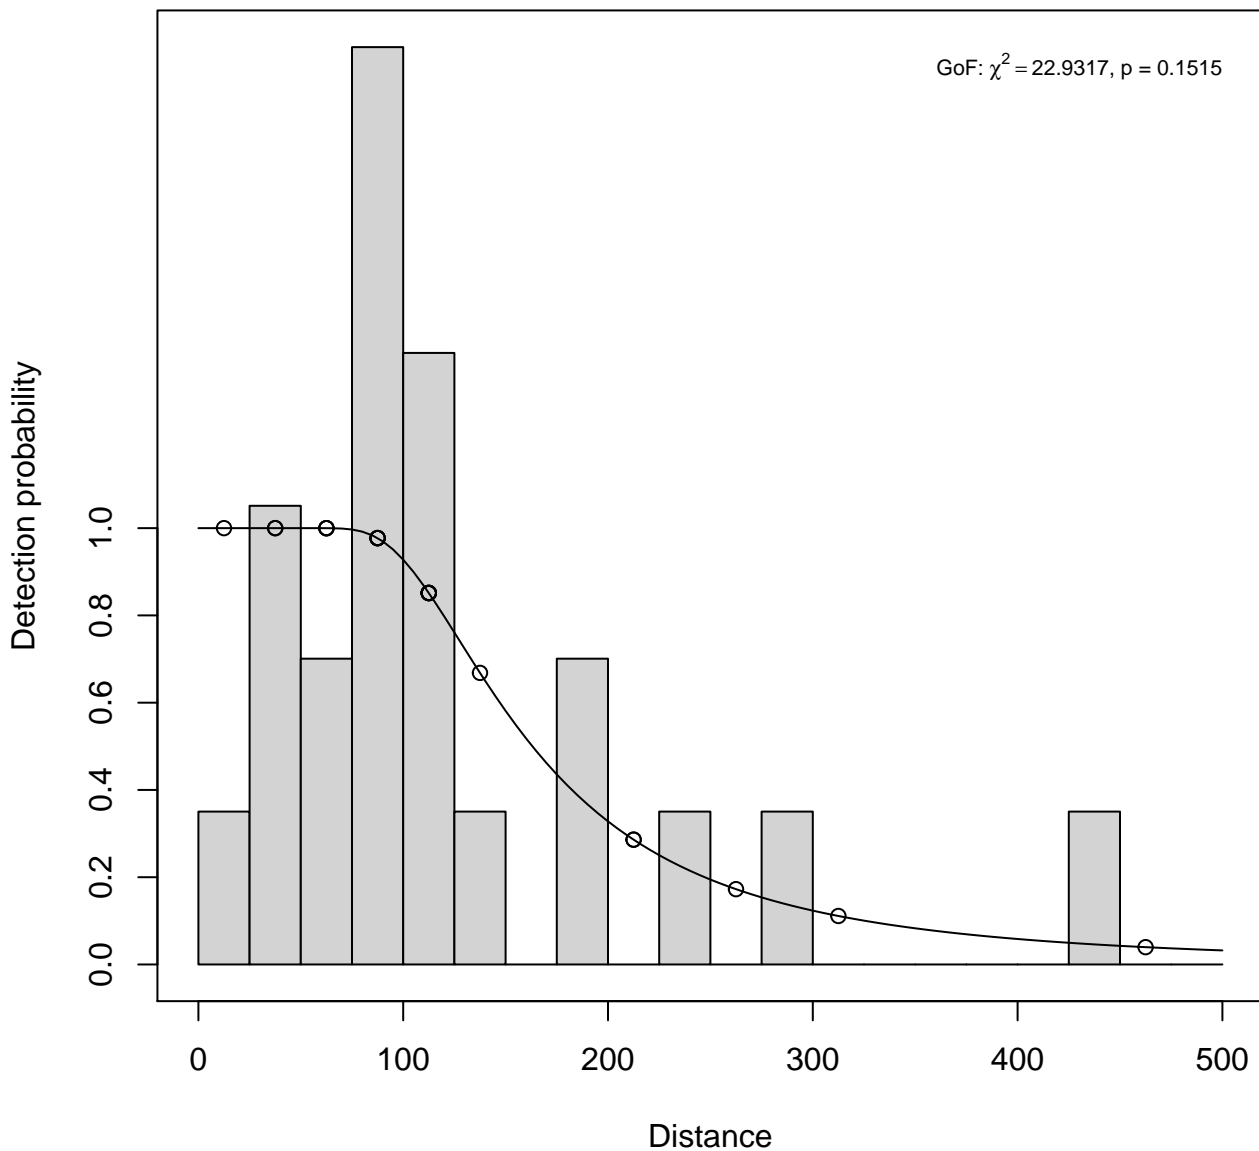

Supplement: s1 [file s1]
