# Supplementary material
Source: MDPI journal article supplement (https://www.mdpi.com/1424-2818/13/7/300)

# **Eupsittula pertinax – Magdalena–Uraba moist forests – Colombia**

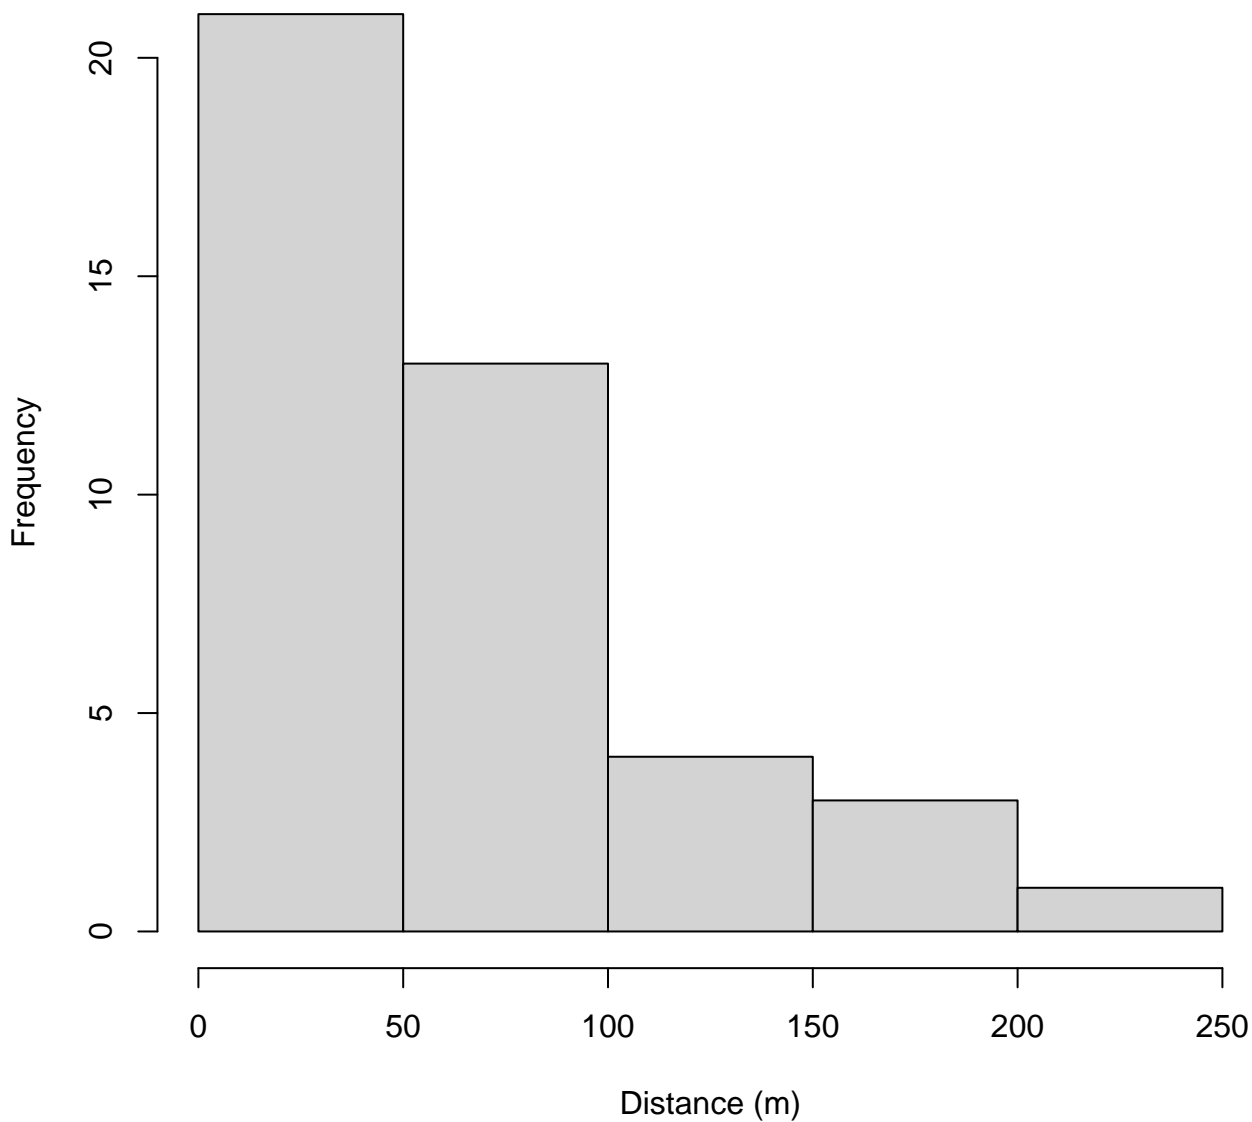

# **Eupsittula pertinax – Magdalena–Uraba moist forests – Colombia**

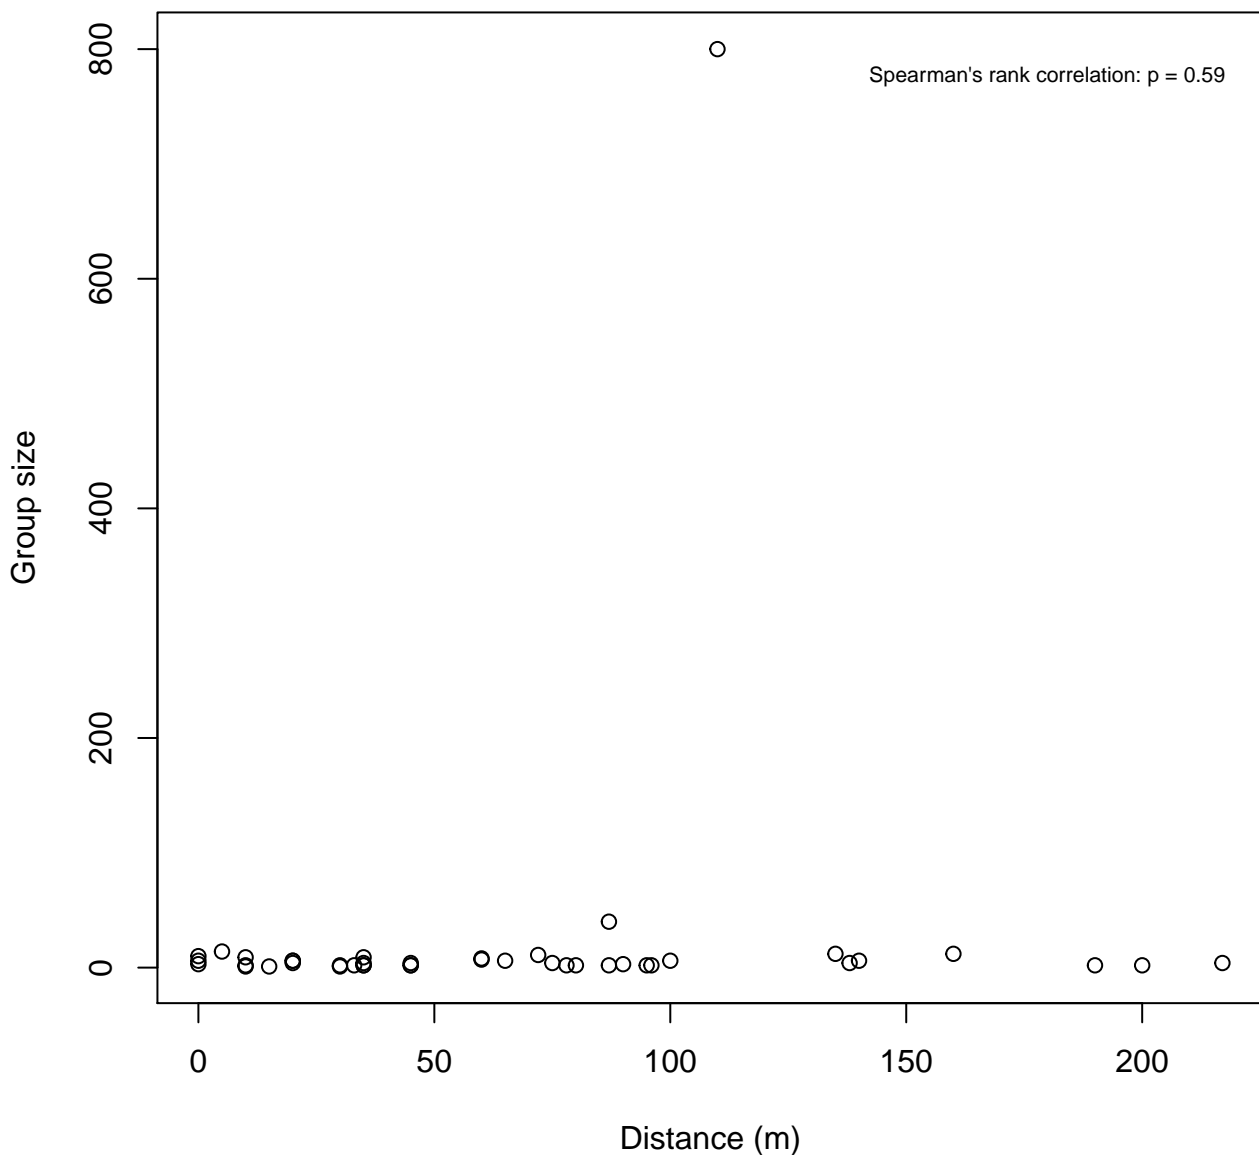

Eupsittula pertinax – Magdalena–Uraba moist forests – Colombia (N = 42, key function = hn)

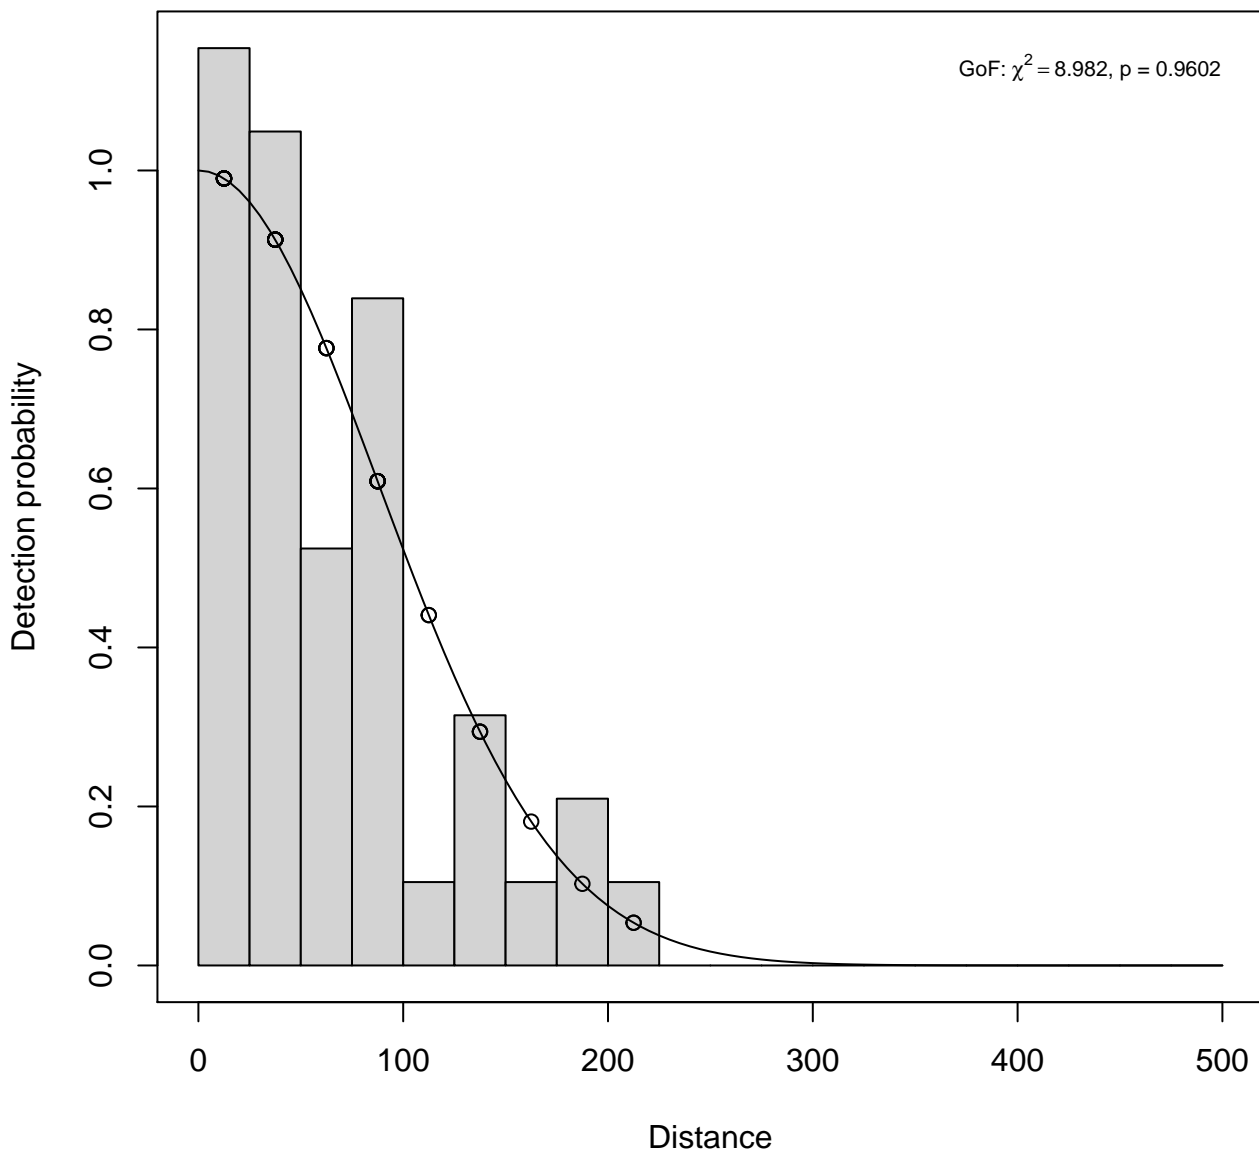

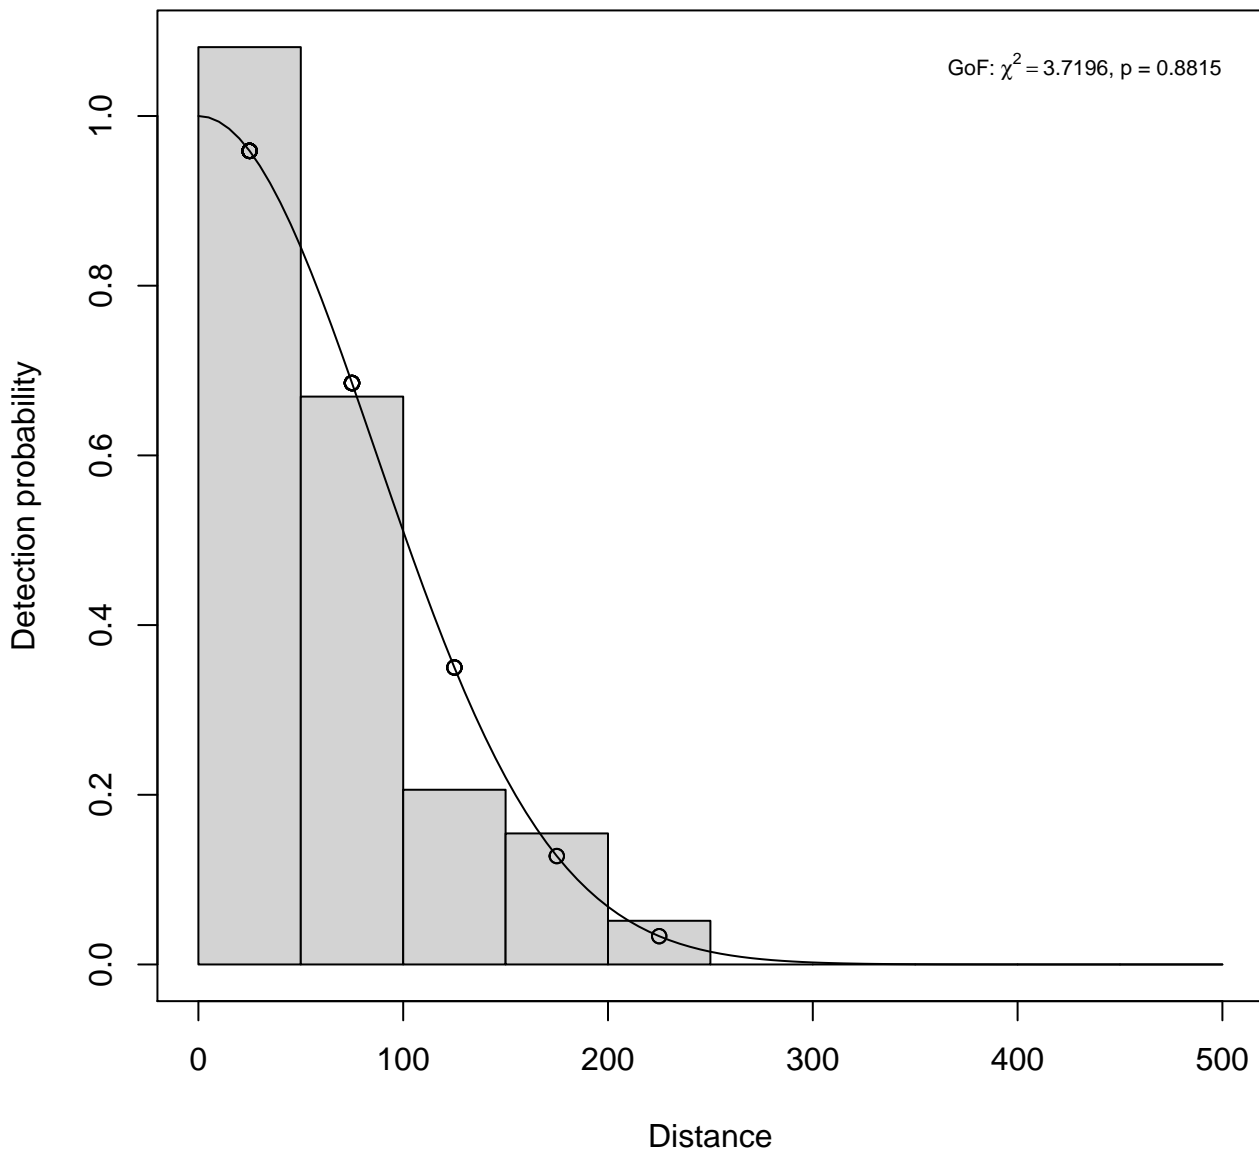

*Eupsittula pertinax* – Magdalena–Uraba moist forests – Colombia (N = 42, key function = hn)

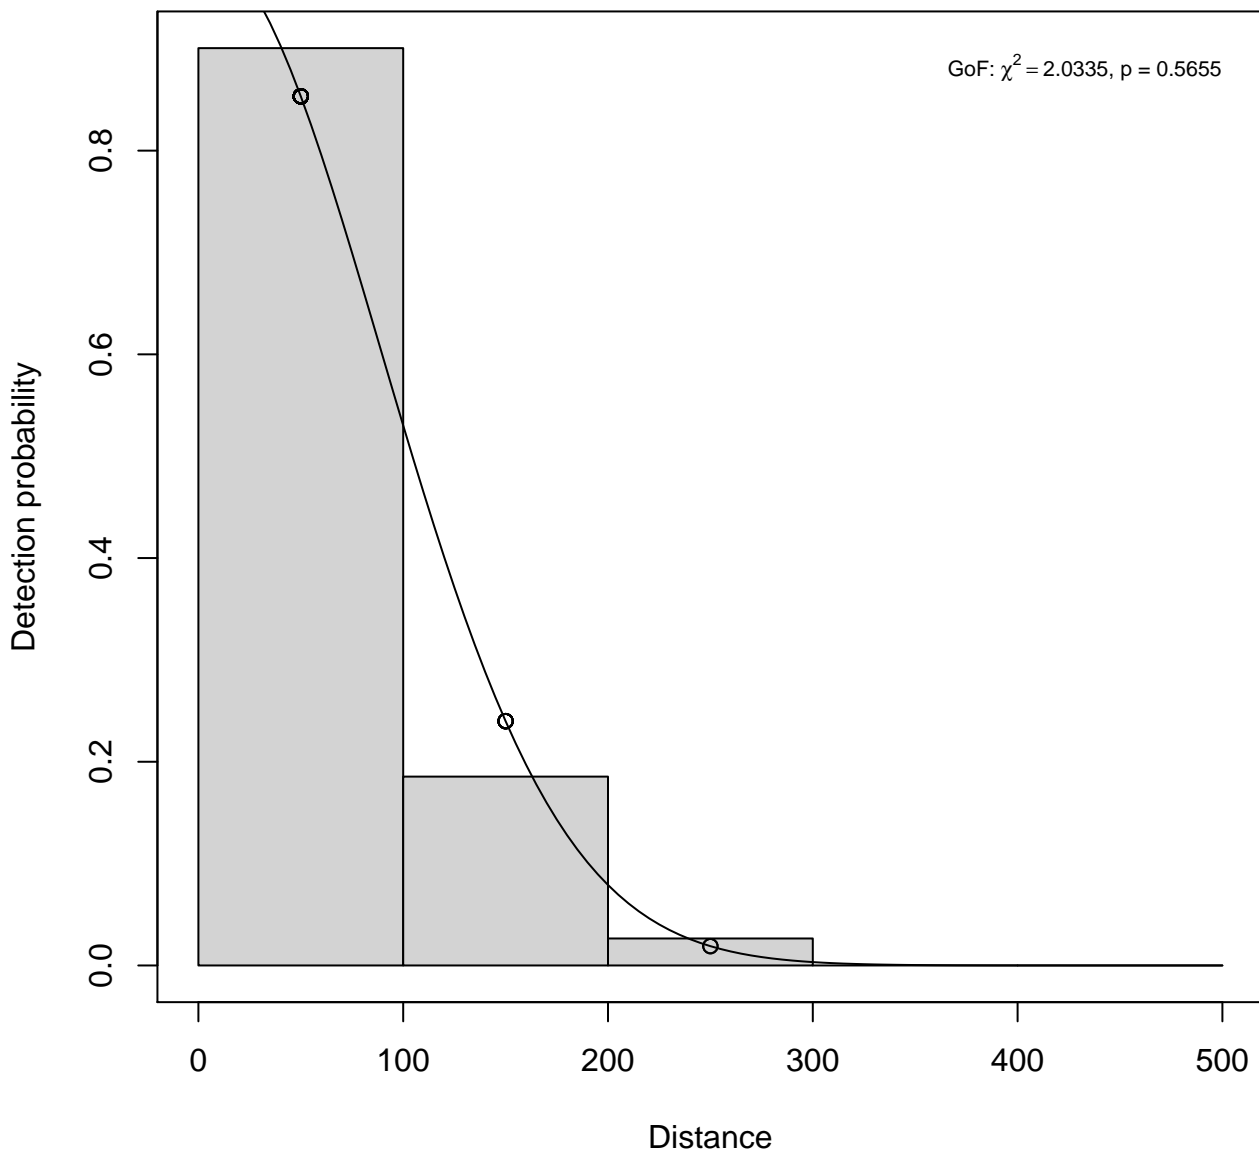

Supplement: s1 [file s1]
