# Supplementary material
Source: MDPI journal article supplement (https://www.mdpi.com/1424-2818/13/7/300)

**Psittacara leucophthalmus – Xingu–Tocantins–Araguaia moist forests – Br**

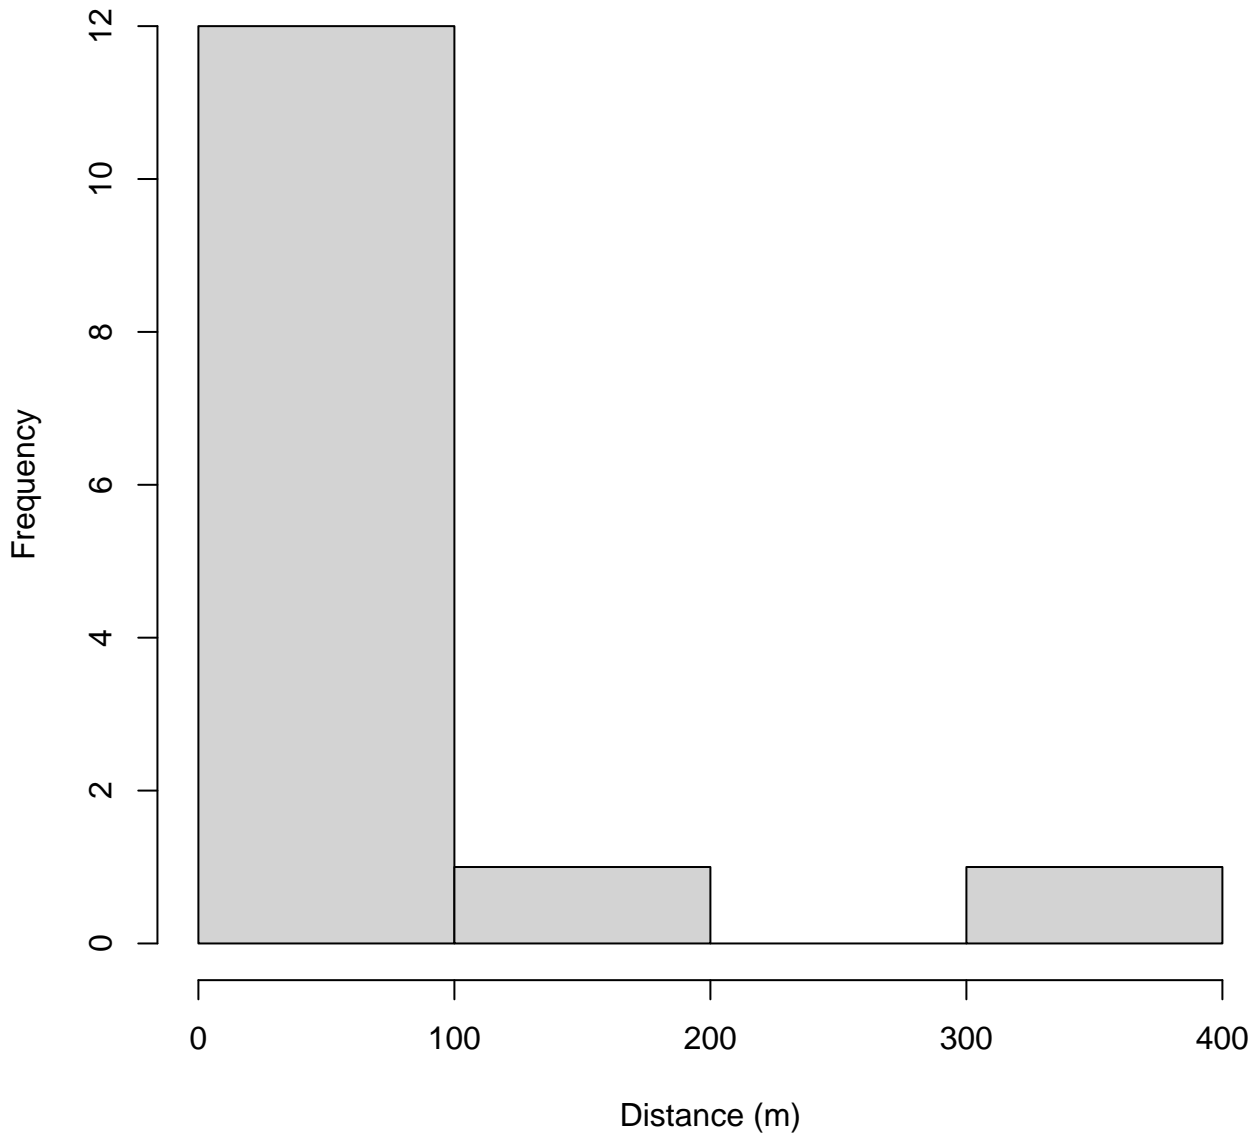

**Psittacara leucophthalmus – Xingu–Tocantins–Araguaia moist forests – Br**

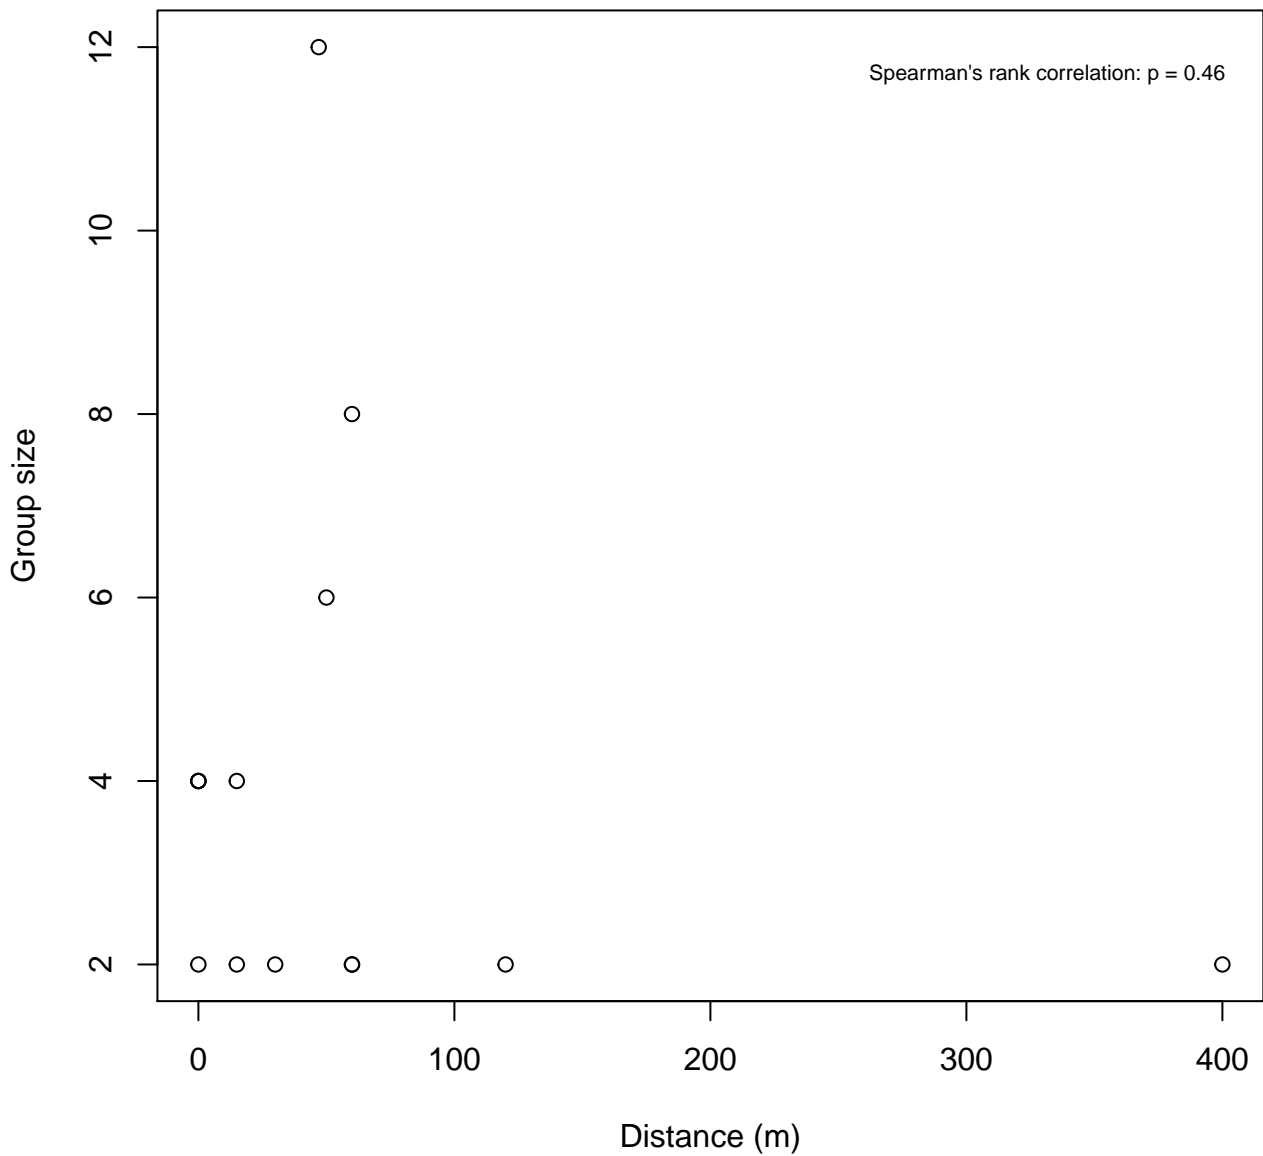

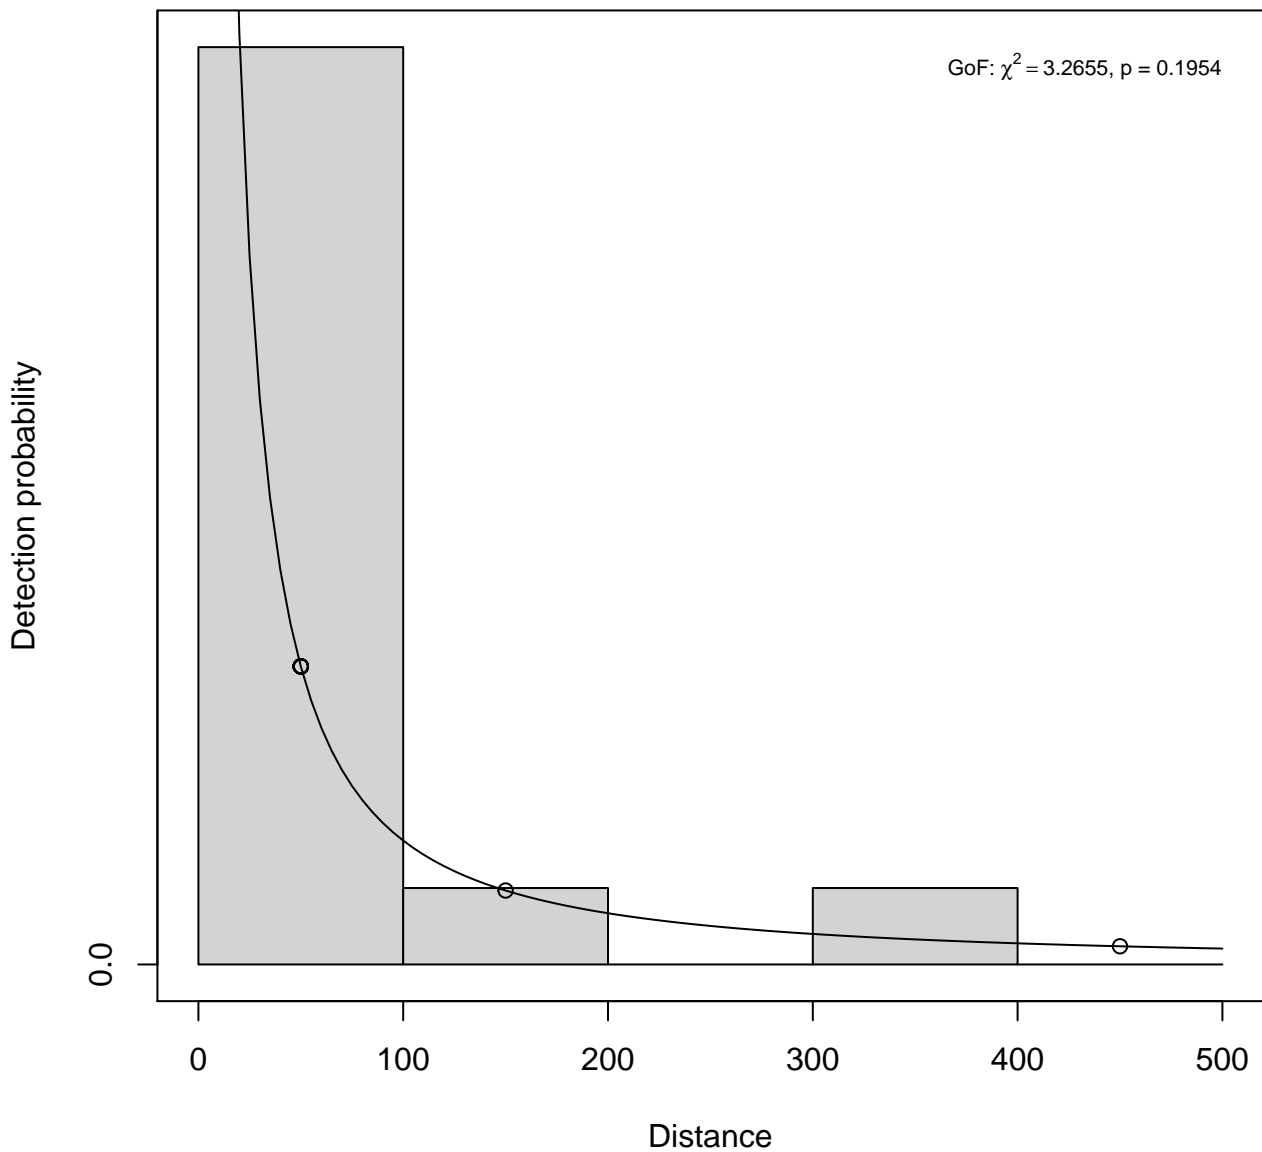

*Psittacara leucophthalmus* – Xingu–Tocantins–Araguaia moist forests – Brazil (N = 14, key function = hr)

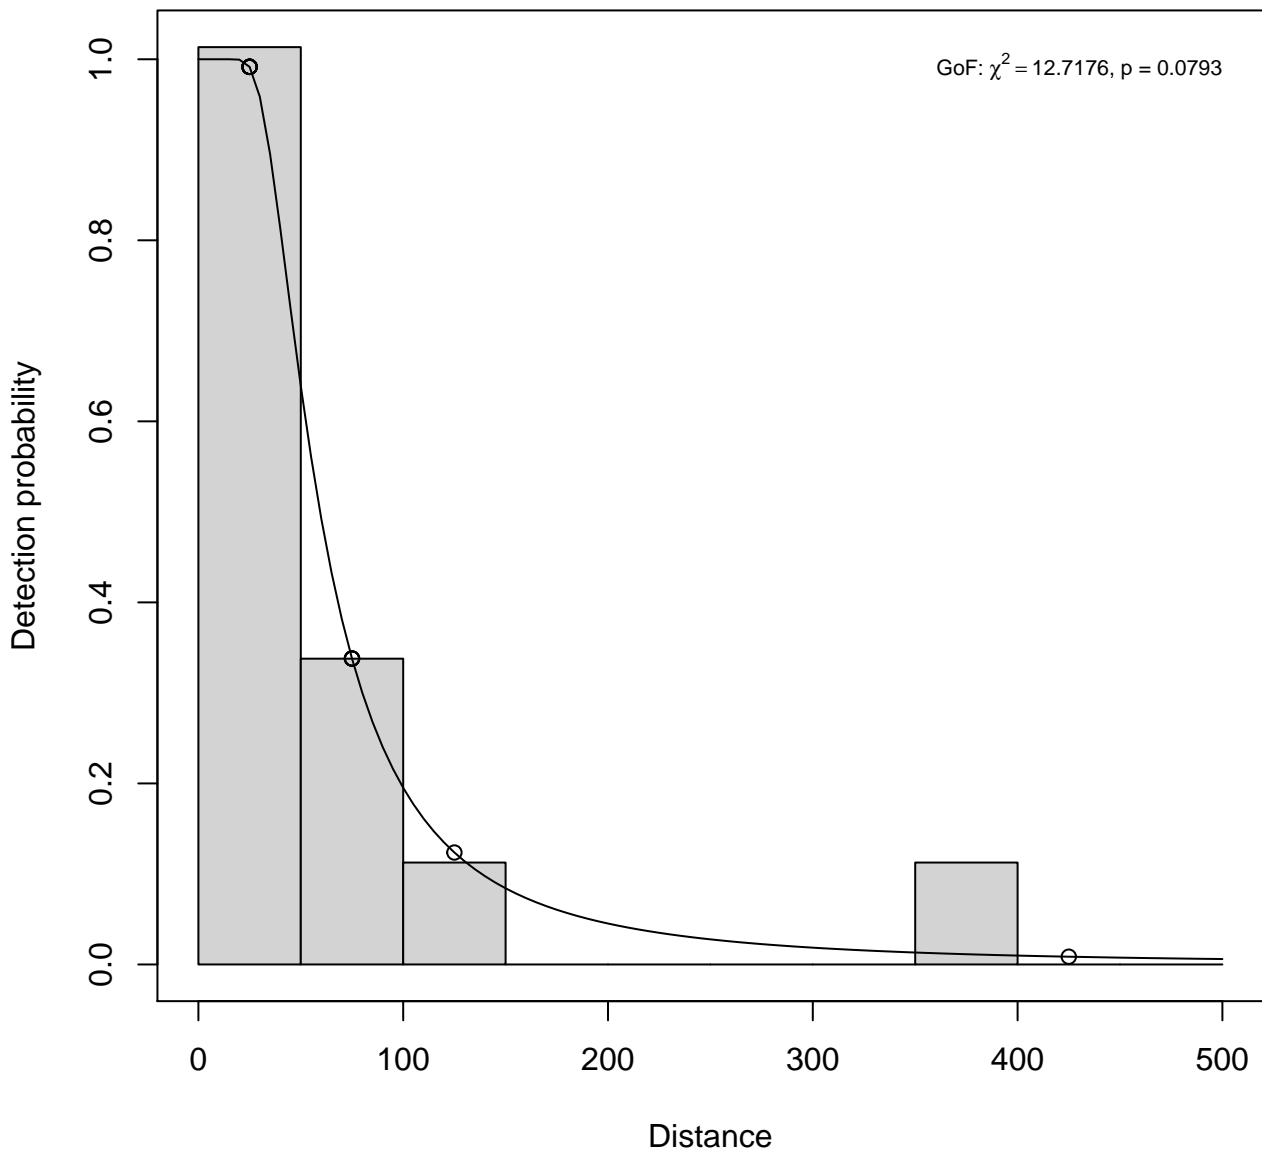

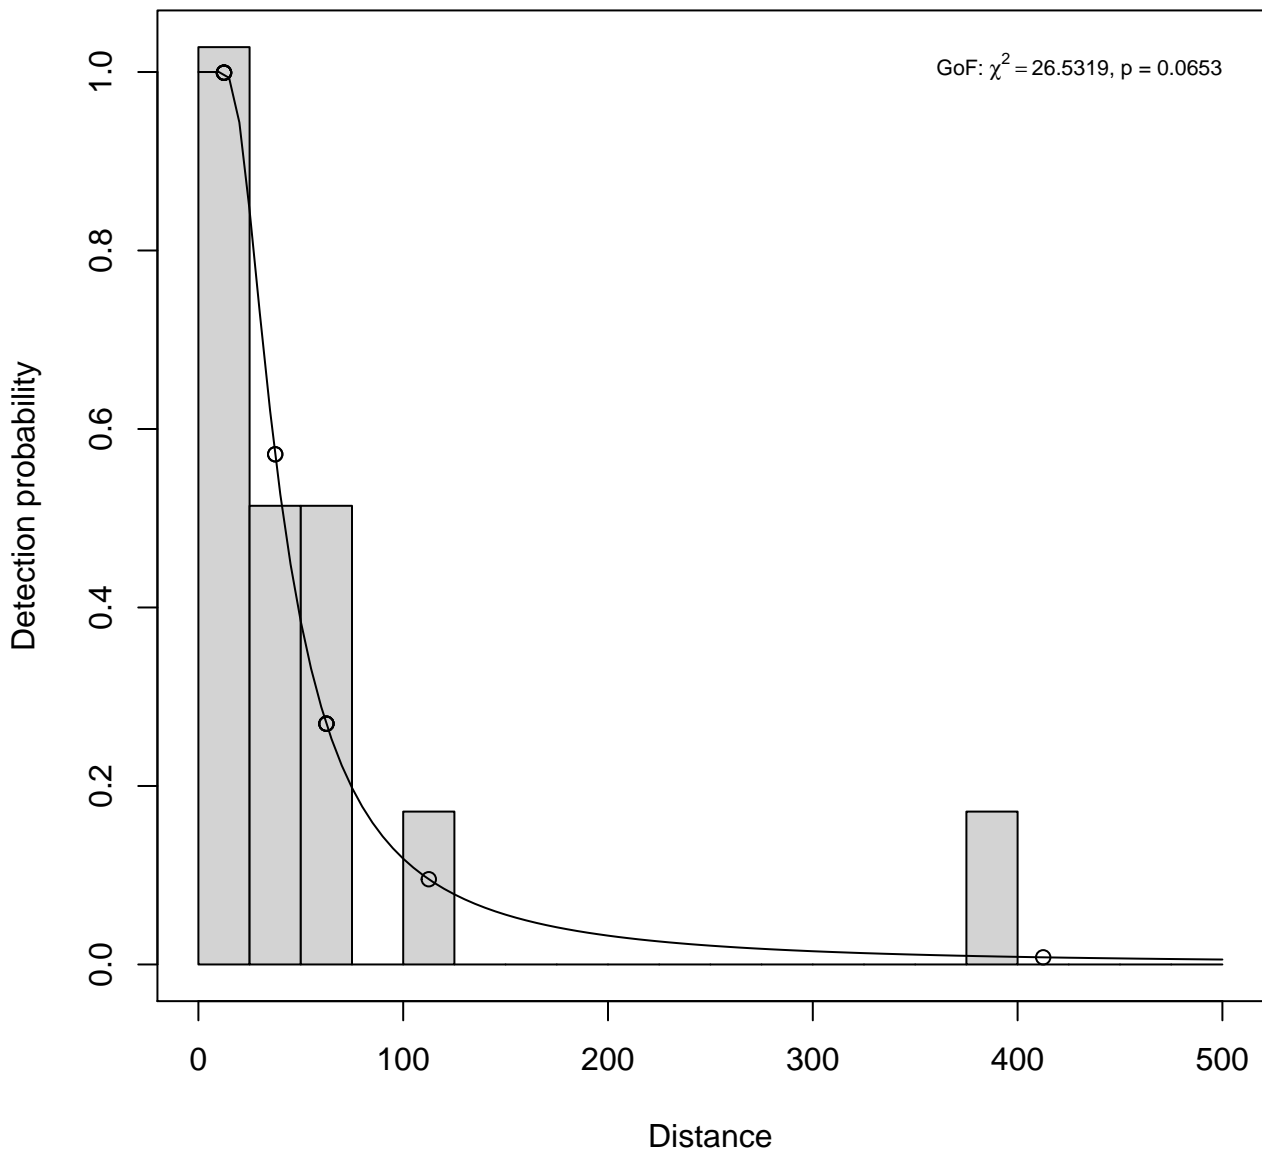

Supplement: s1 [file s1]
