# Supplementary material
Source: MDPI journal article supplement (https://www.mdpi.com/1424-2818/13/7/300)

# Brotogetis jugularis – Isthmian–Atlantic moist forests – Panama

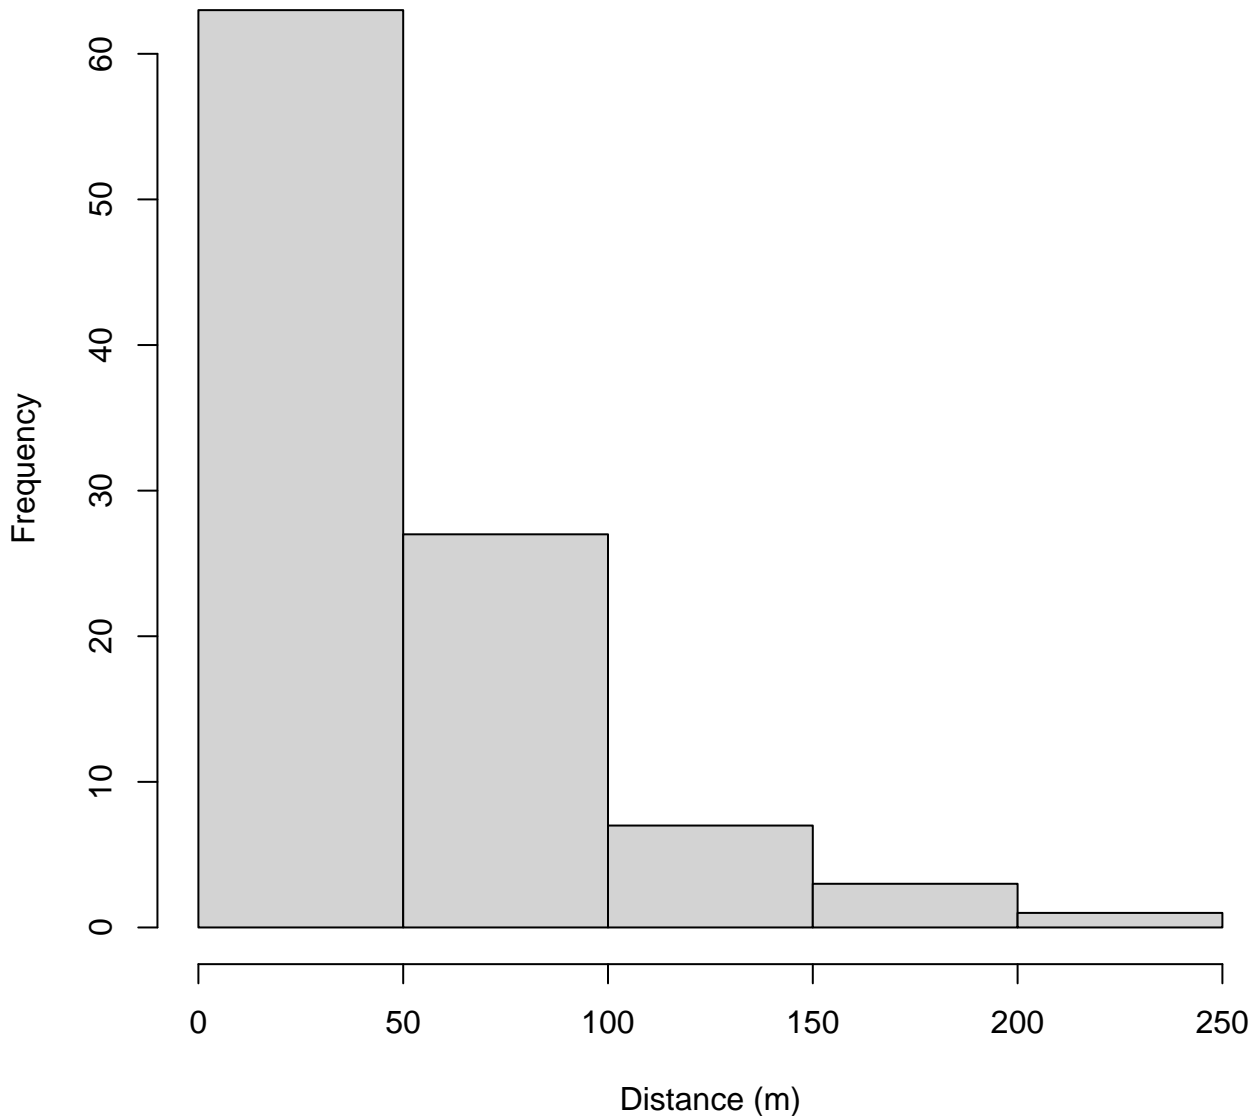

## Brotoyeris jugularis – Isthmian–Atlantic moist forests – Panama

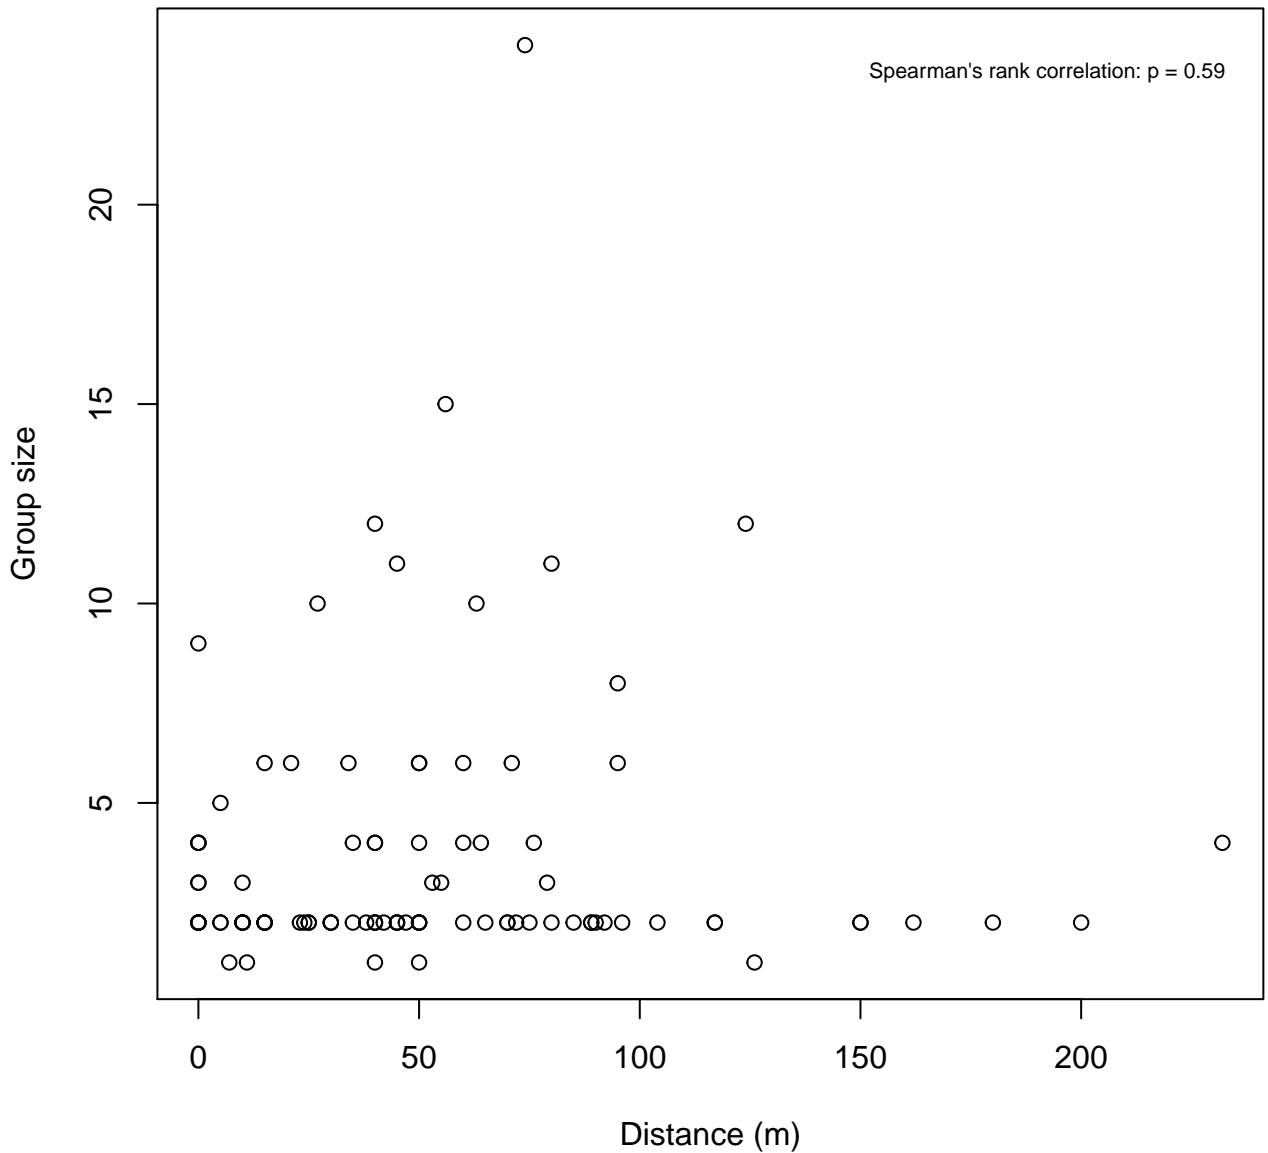

*Brotogeris jugularis* – Isthmian–Atlantic moist forests – Panama (N = 101, key function = hr)

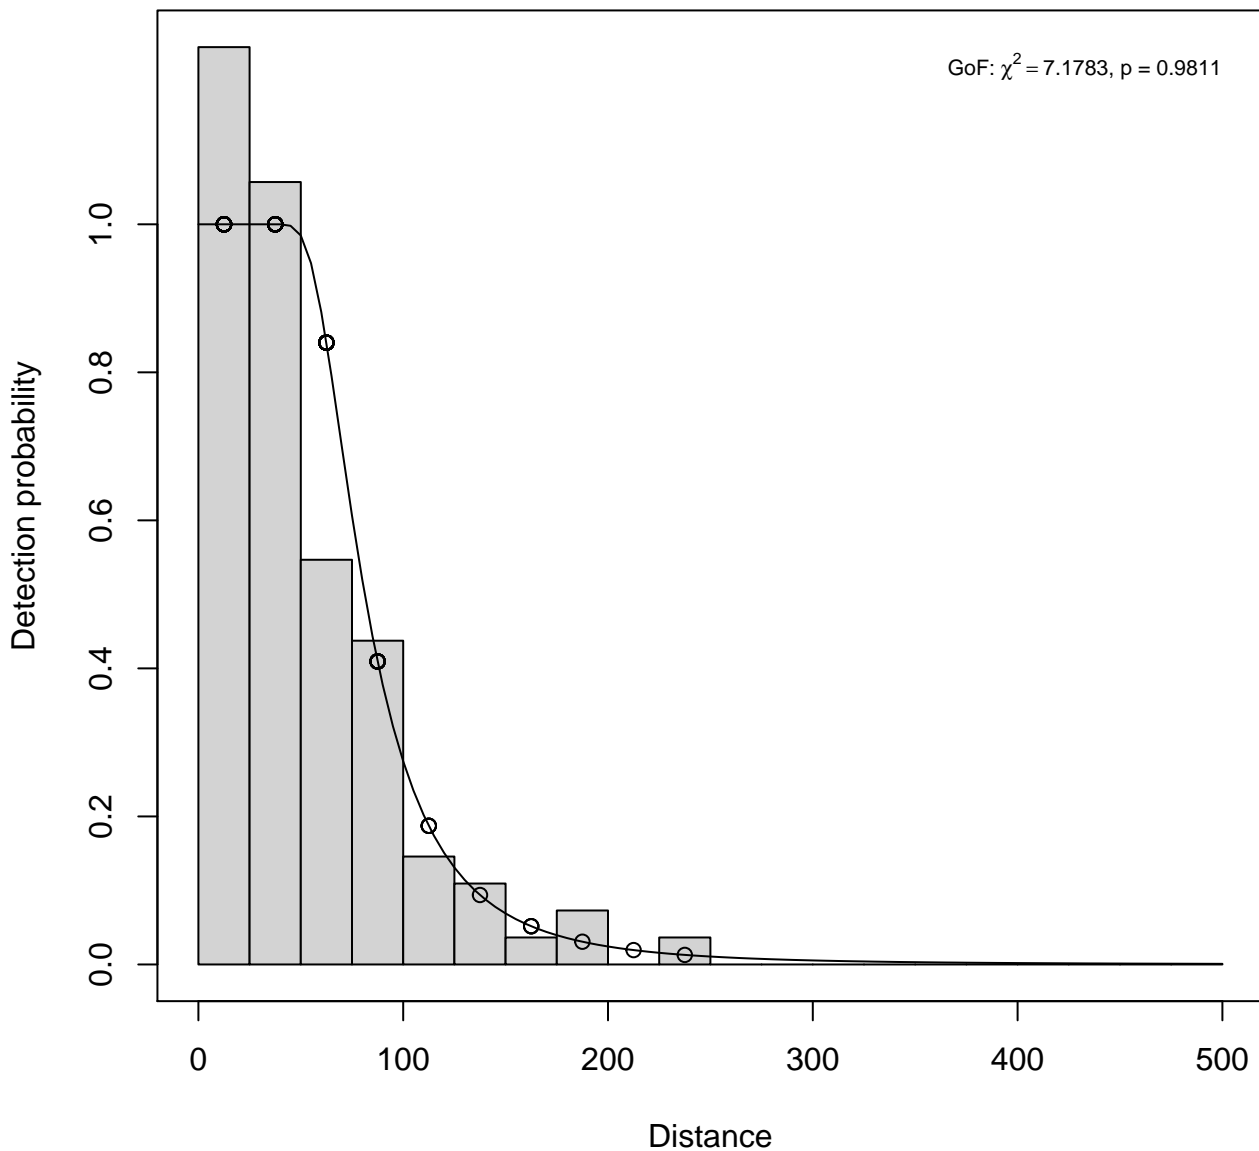

*Brotogeris jugularis* – Isthmian–Atlantic moist forests – Panama (N = 101, key function = hr)

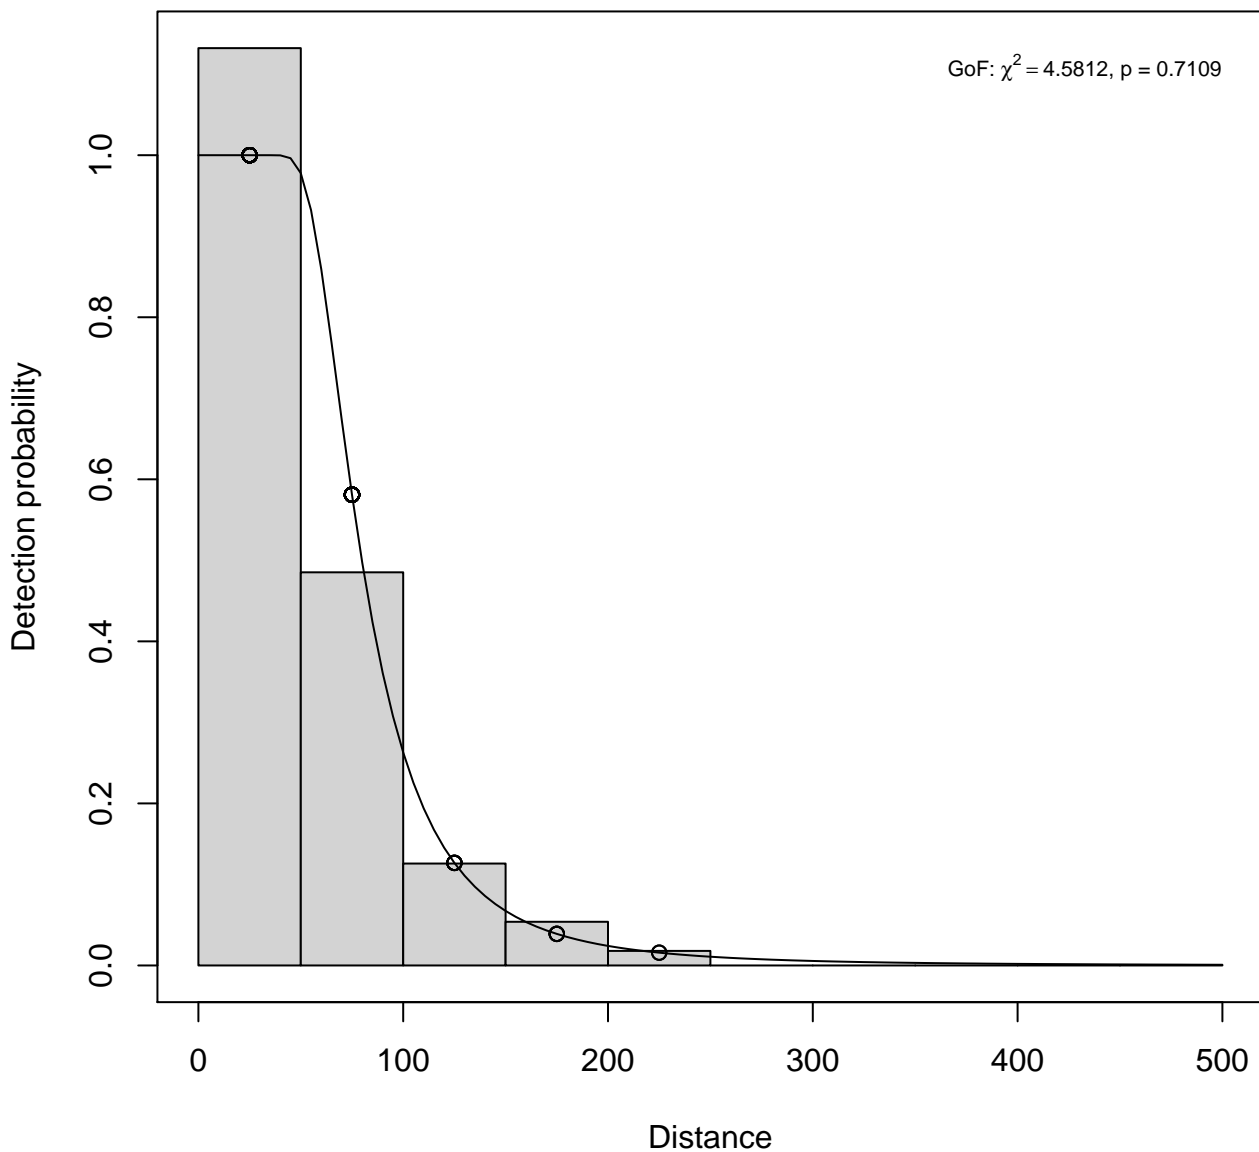

*Brotogeris jugularis* – Isthmian–Atlantic moist forests – Panama (N = 101, key function = hr)

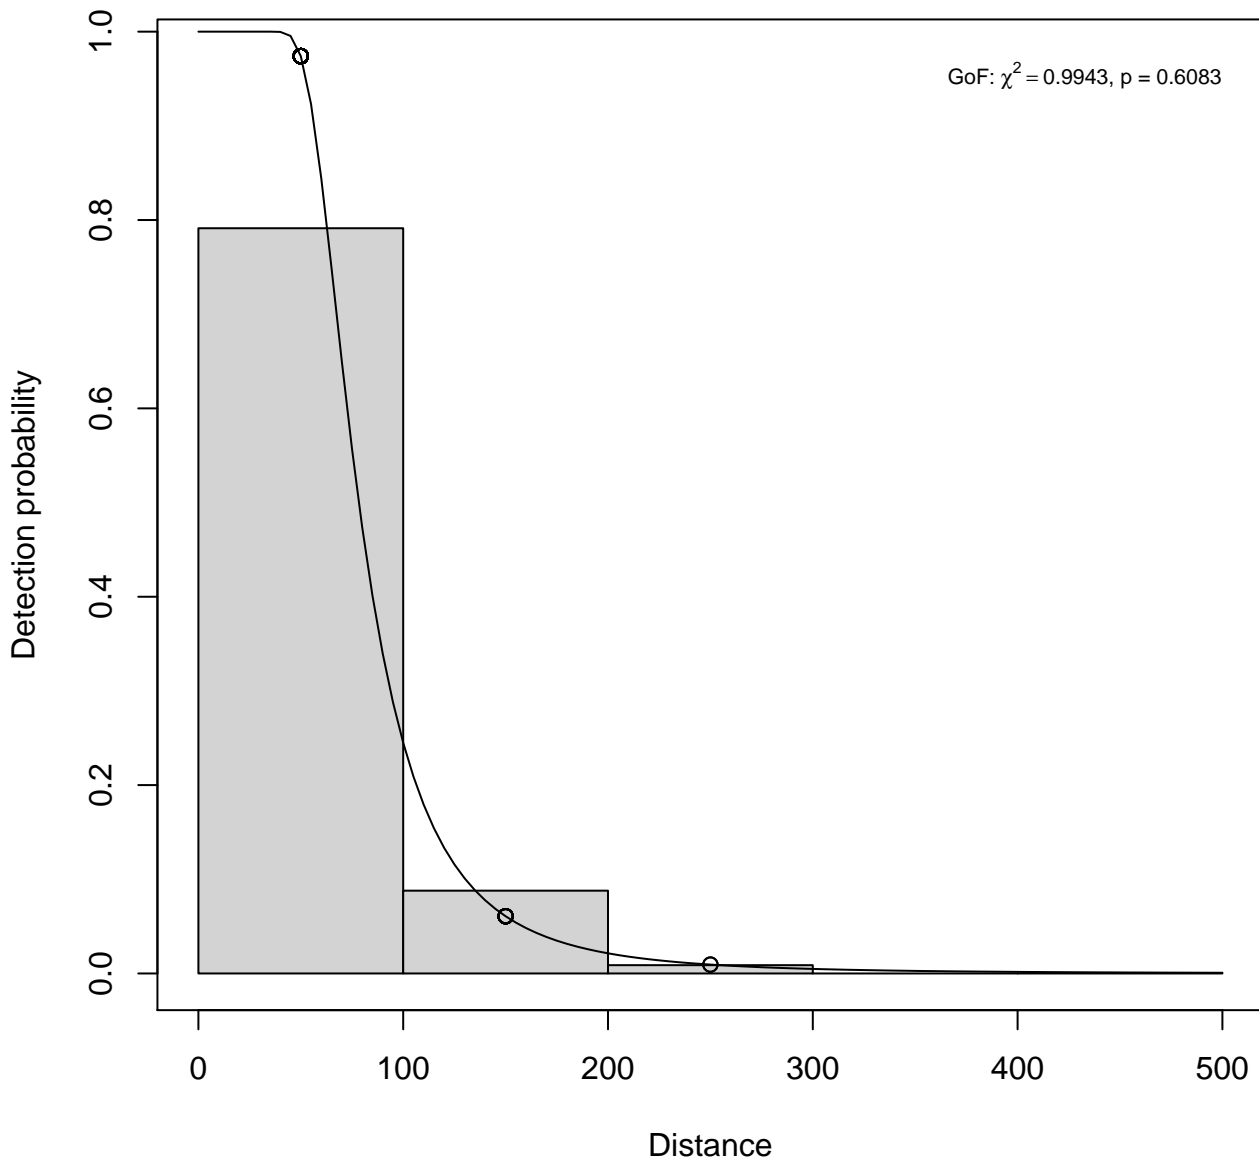

Supplement: s1 [file s1]
