# Supplementary material
Source: MDPI journal article supplement (https://www.mdpi.com/1424-2818/13/7/300)

# Brotojeris jugularis – Costa Rican seasonal moist forests – Costa Rica

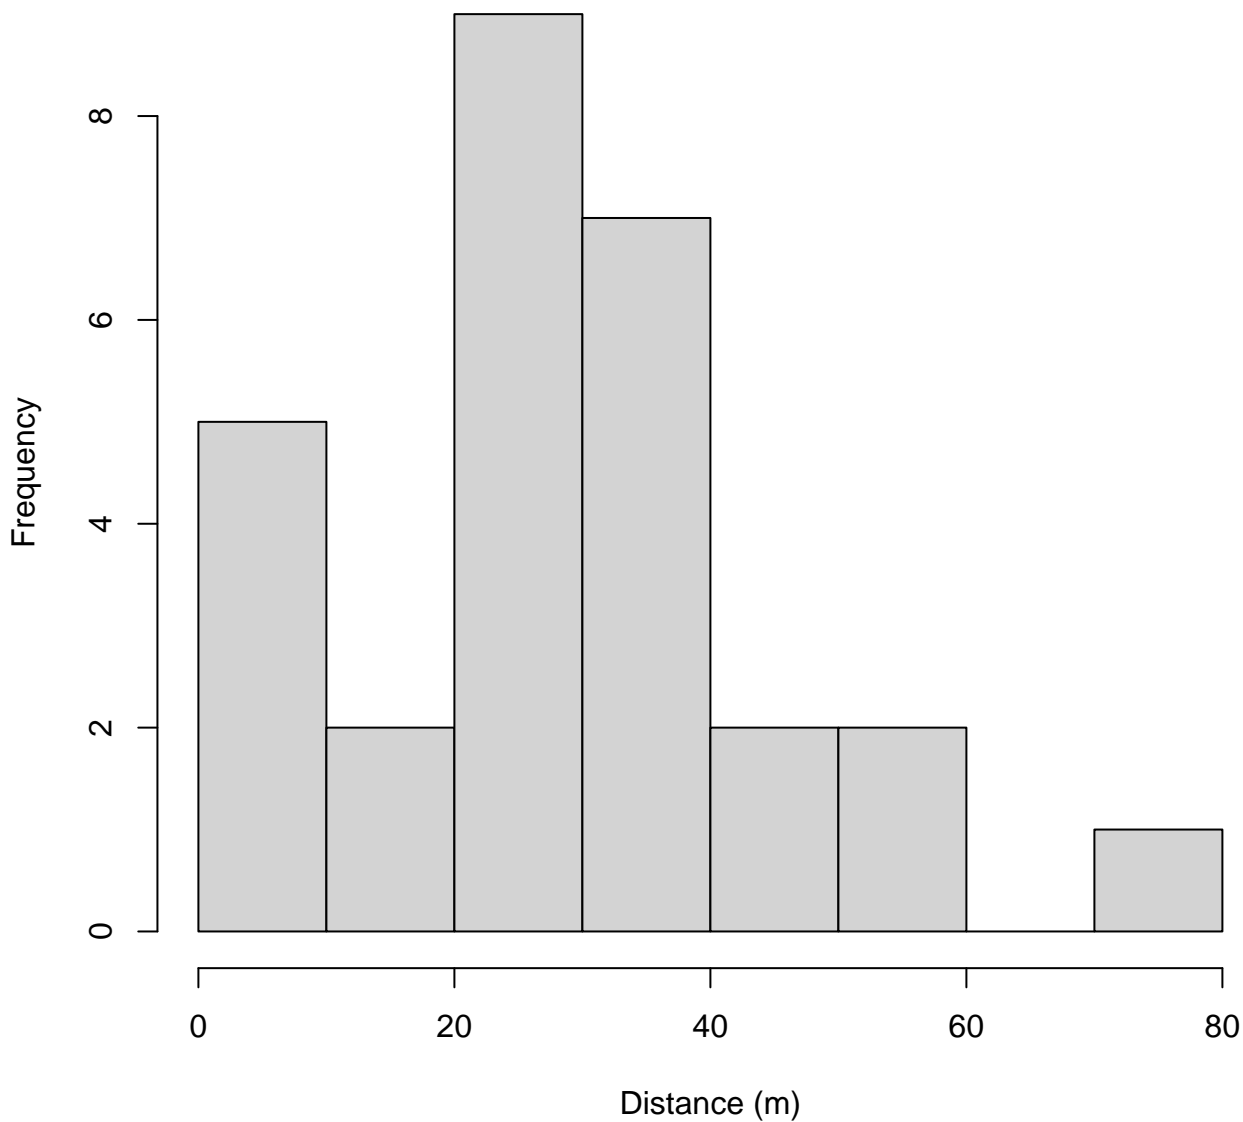

# Brotojeris jugularis – Costa Rican seasonal moist forests – Costa Rica

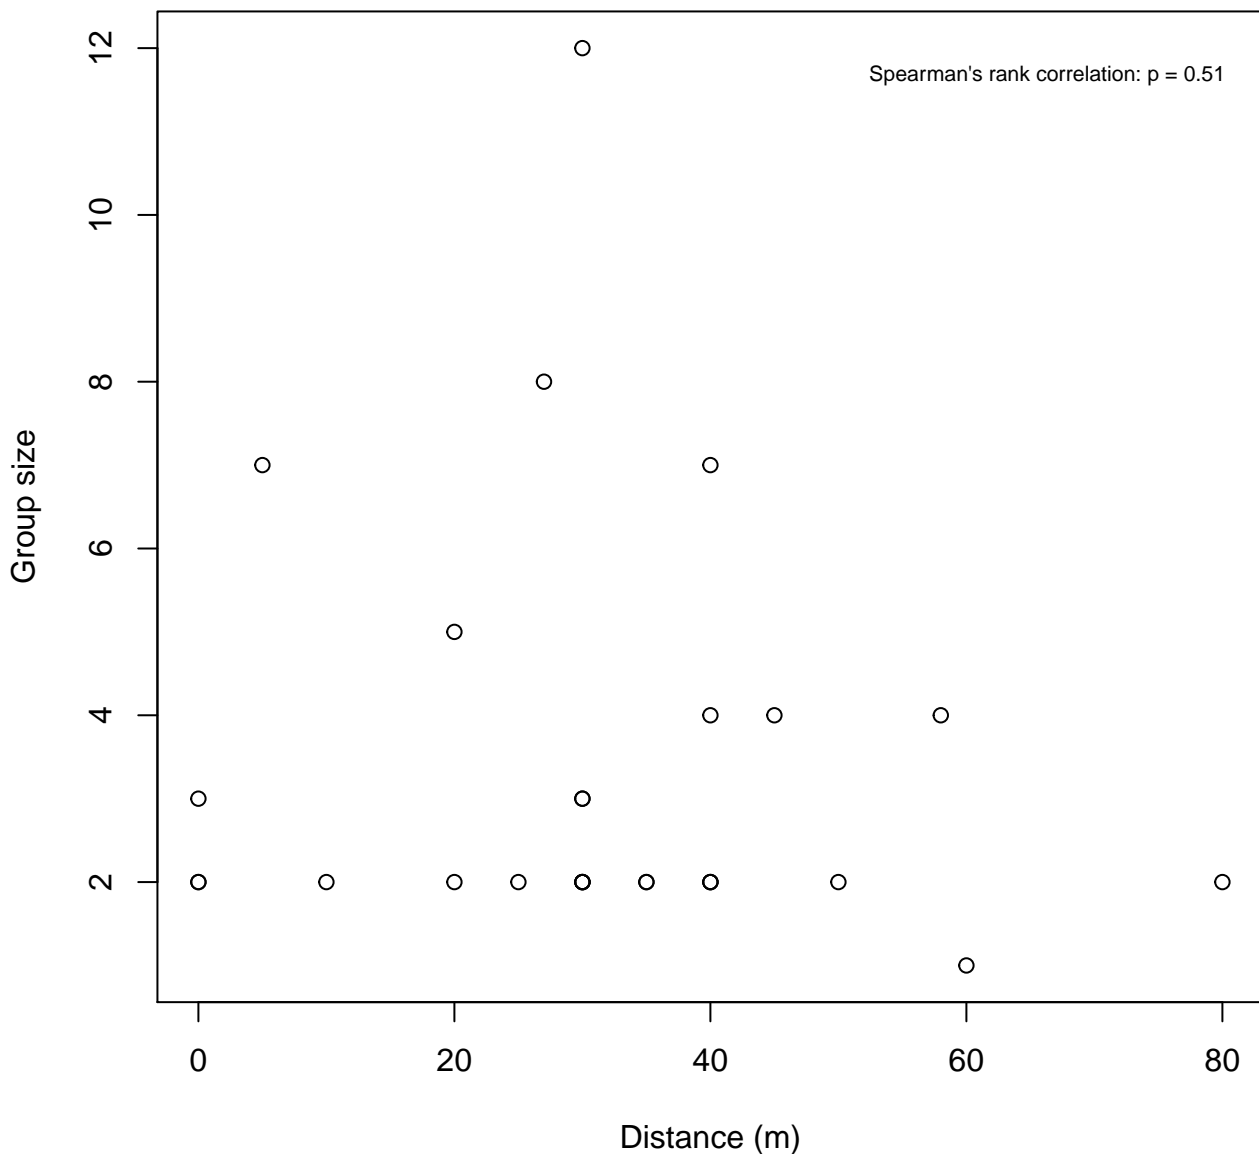

Brotogeris jugularis – Costa Rican seasonal moist forests – Costa Rica (N = 28, key function = hn)

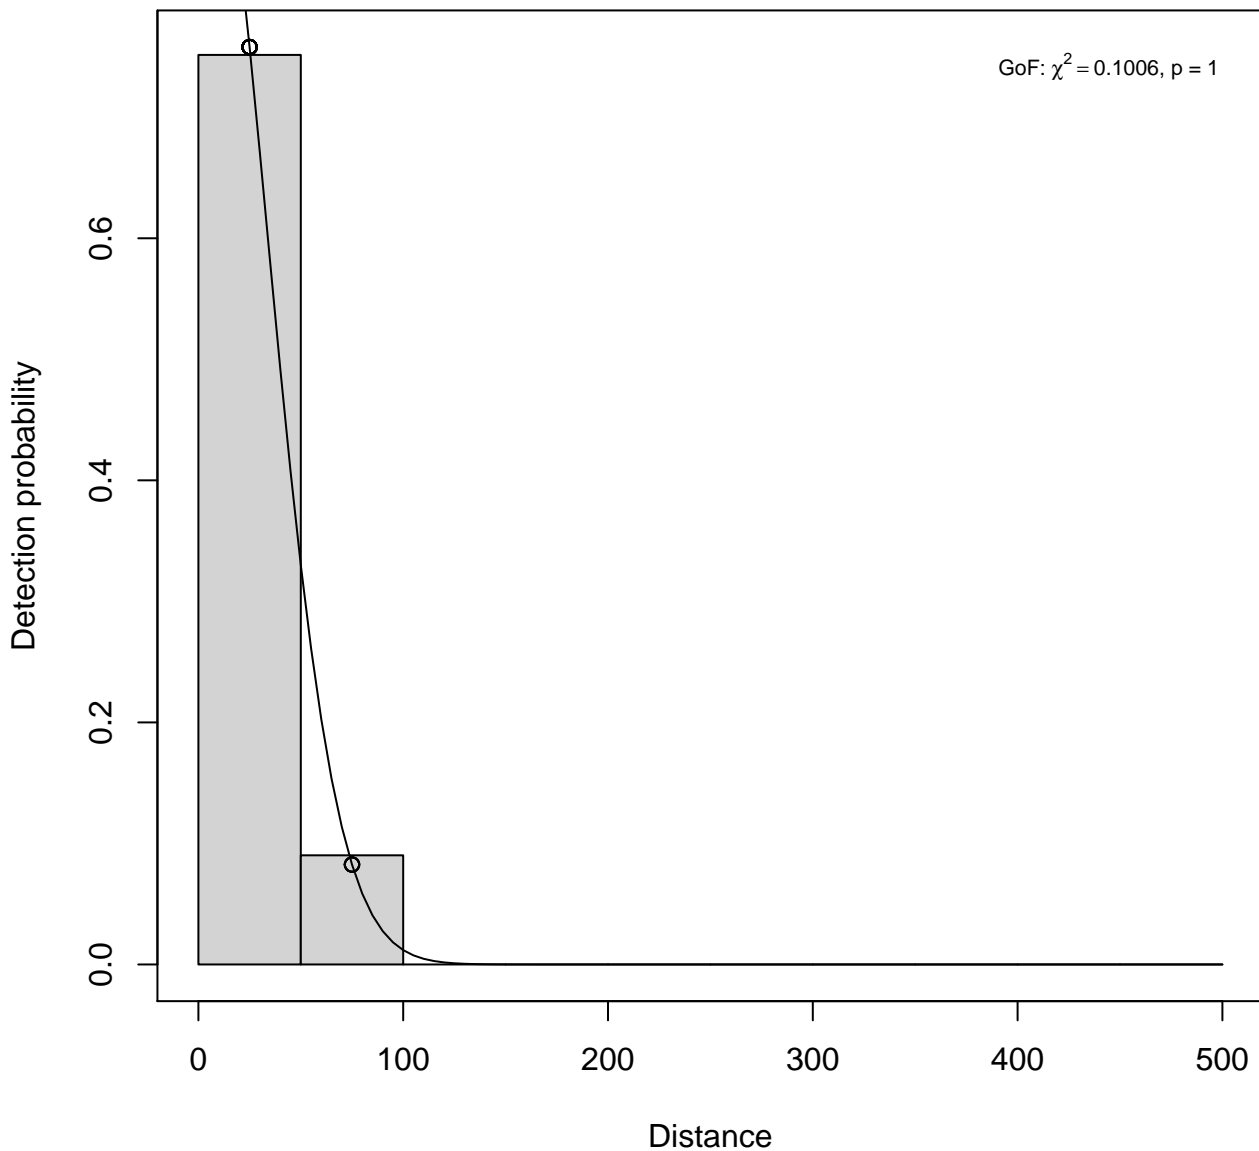

GoF:  $\chi^2 = \text{NA}$ , p = NA

*Brotogetis jugularis* – Costa Rican seasonal moist forests – Costa Rica (N = 28, key function = hr)

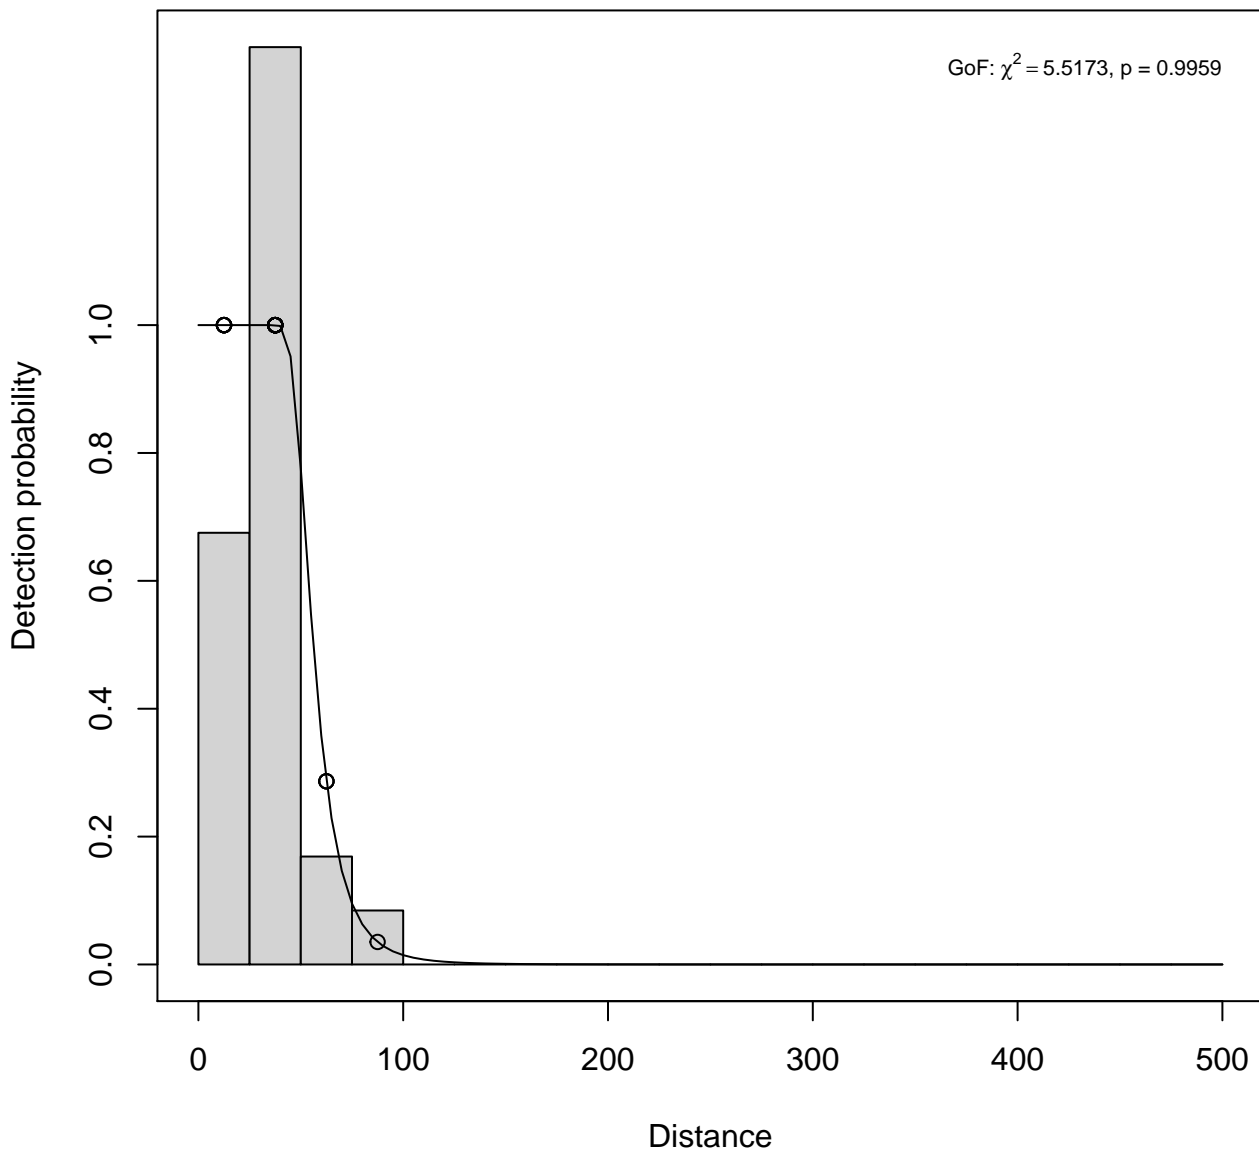

Supplement: s1 [file s1]
