# Supplementary material
Source: MDPI journal article supplement (https://www.mdpi.com/1424-2818/13/7/300)

# Amazona ochrocephala – Madeira–Tapajos moist forests – Brazil

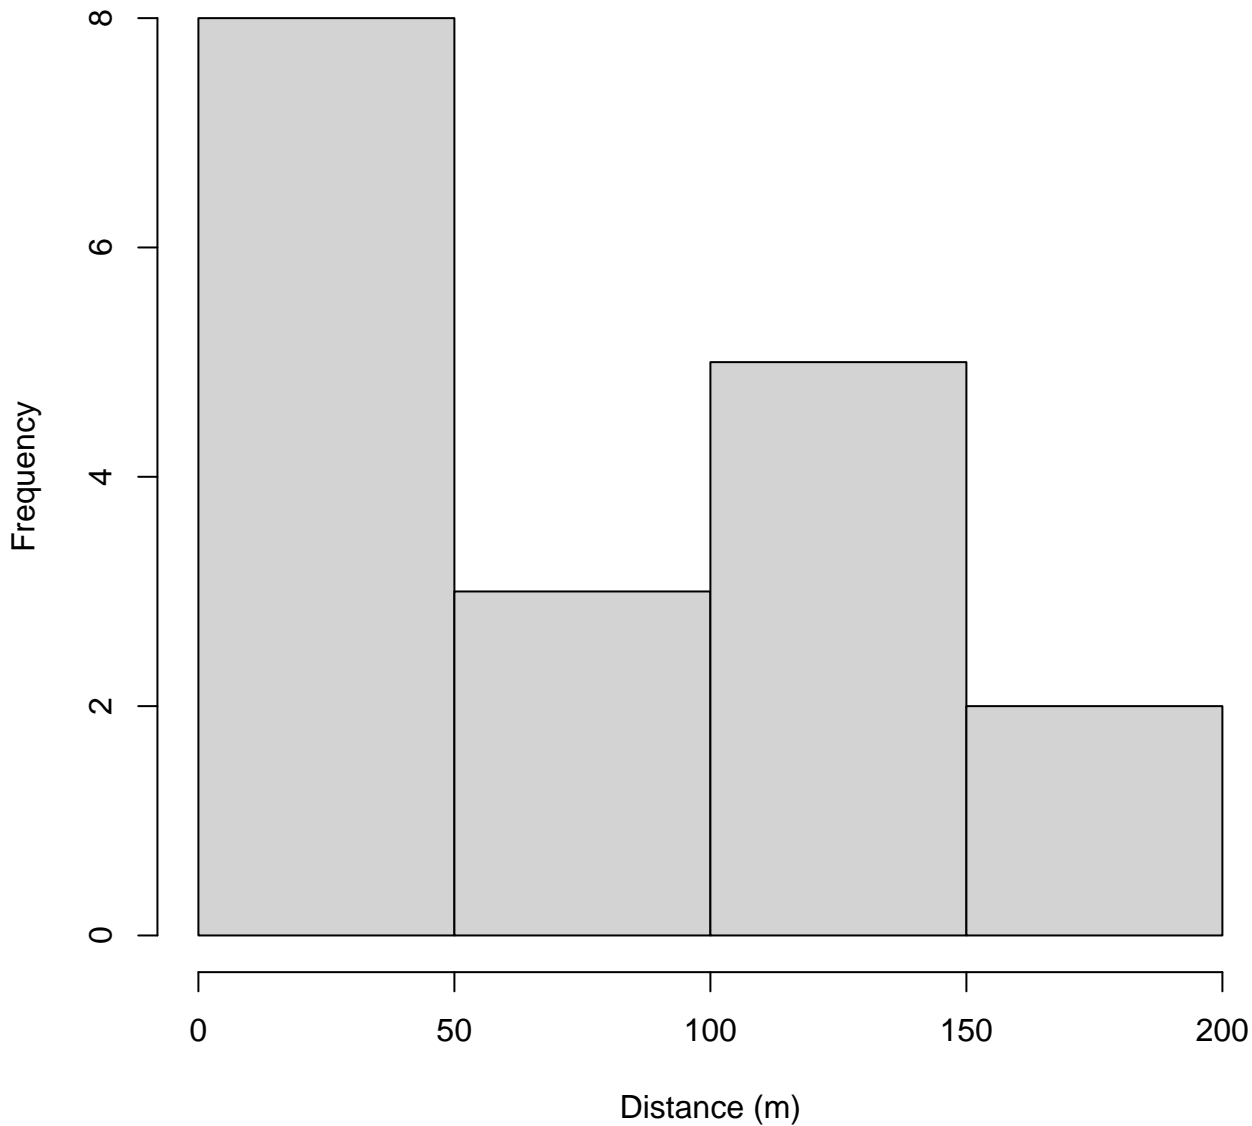

# Amazona ochrocephala – Madeira–Tapajos moist forests – Brazil

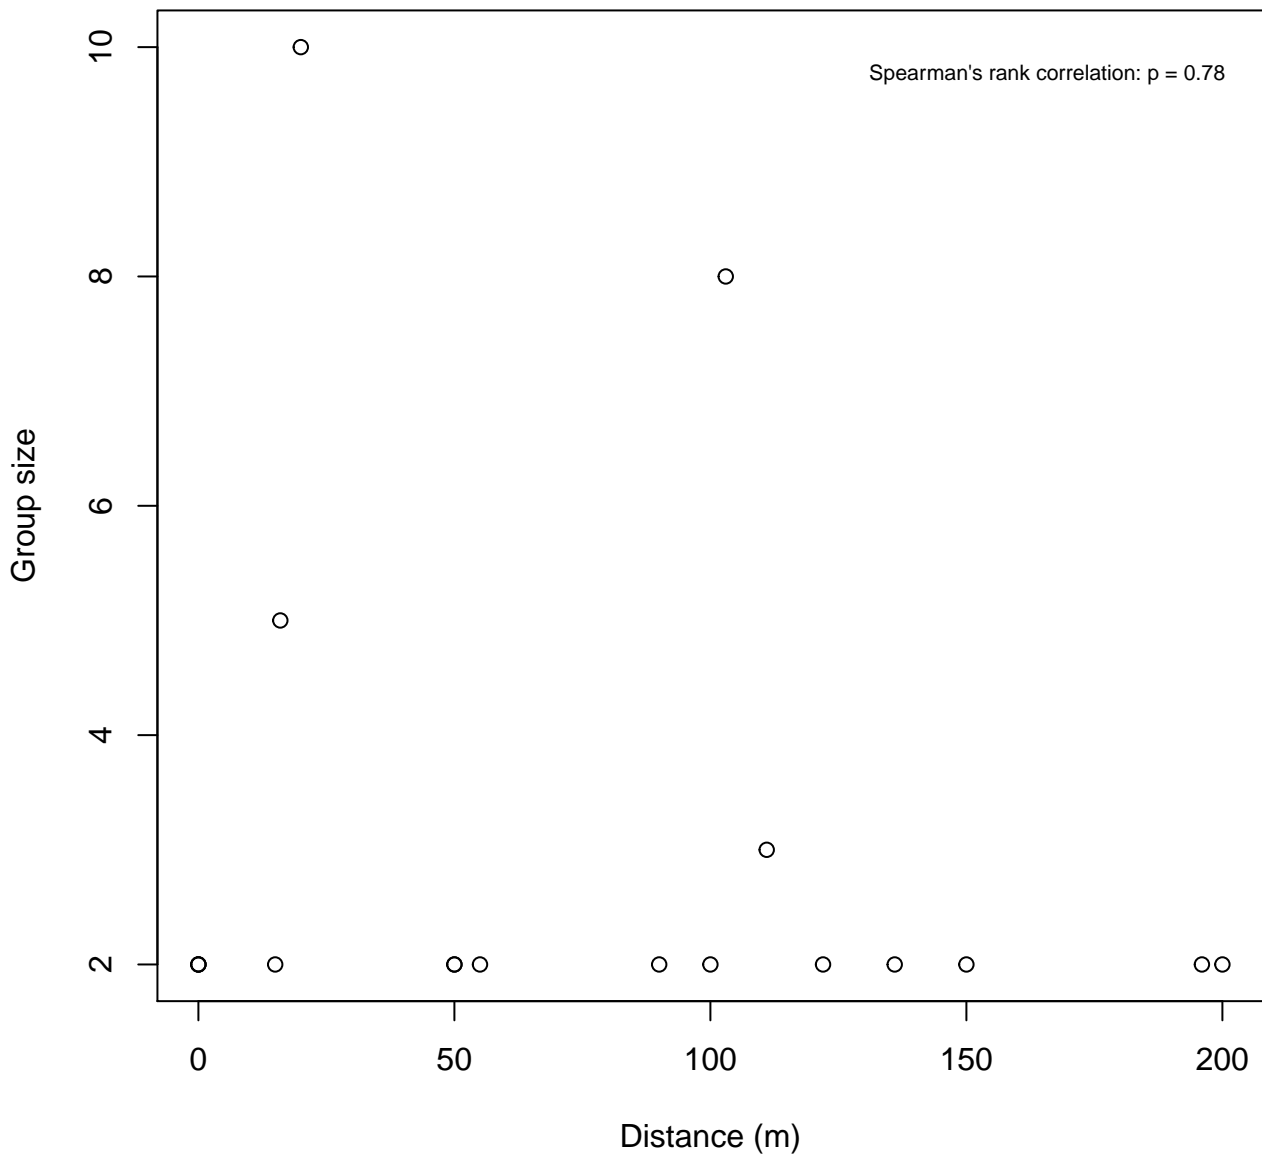

Amazona ochrocephala – Madeira–Tapajos moist forests – Brazil (N = 18, key function = hn)

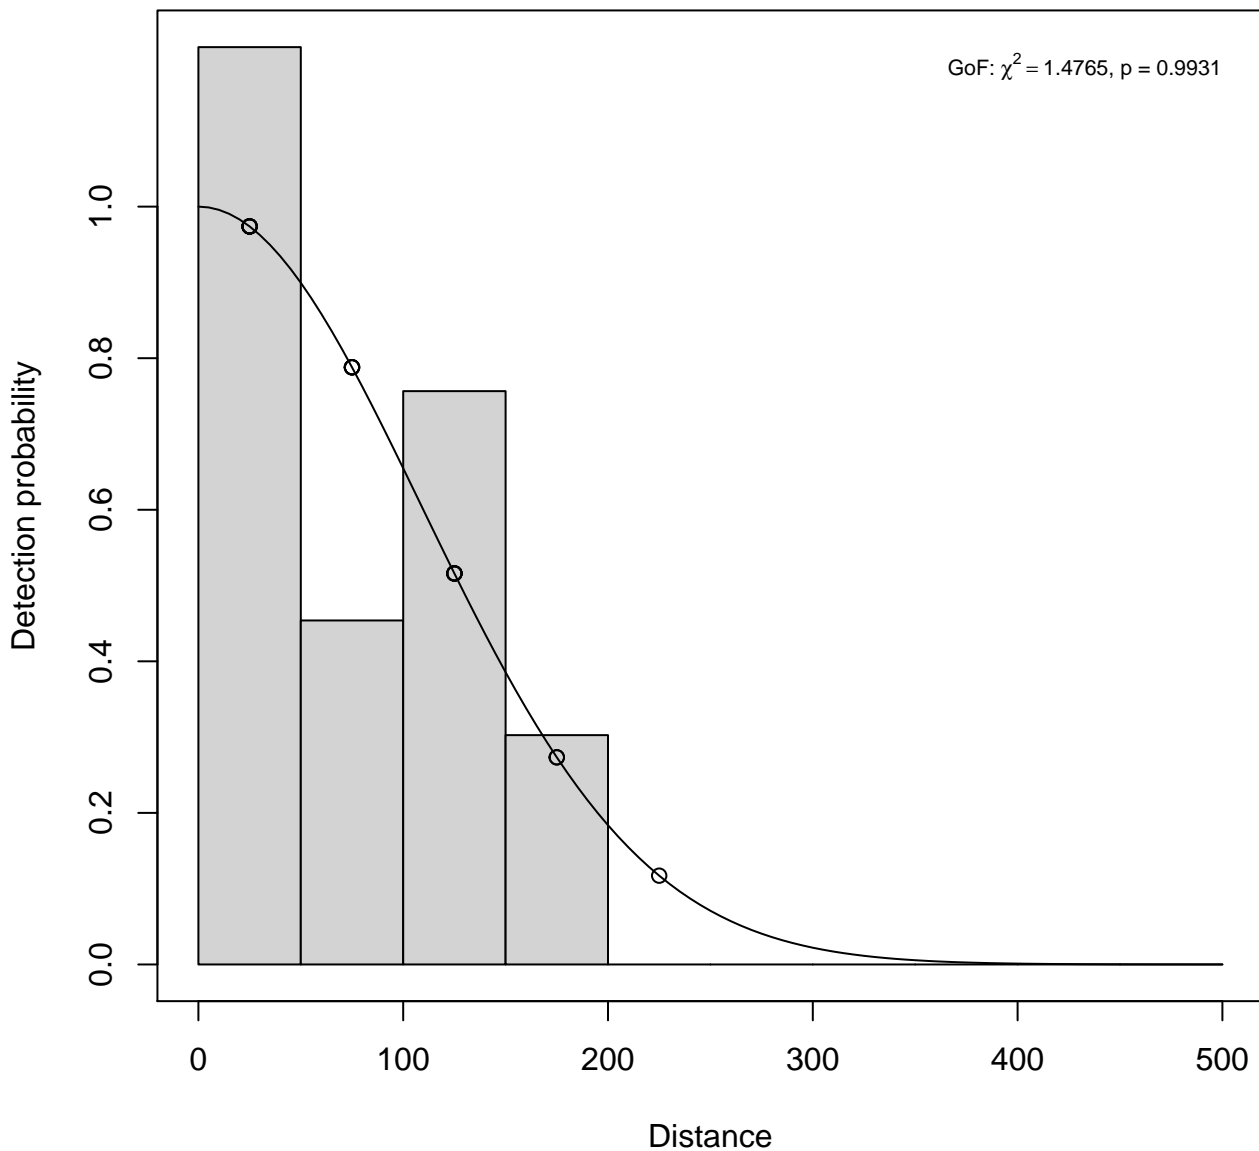

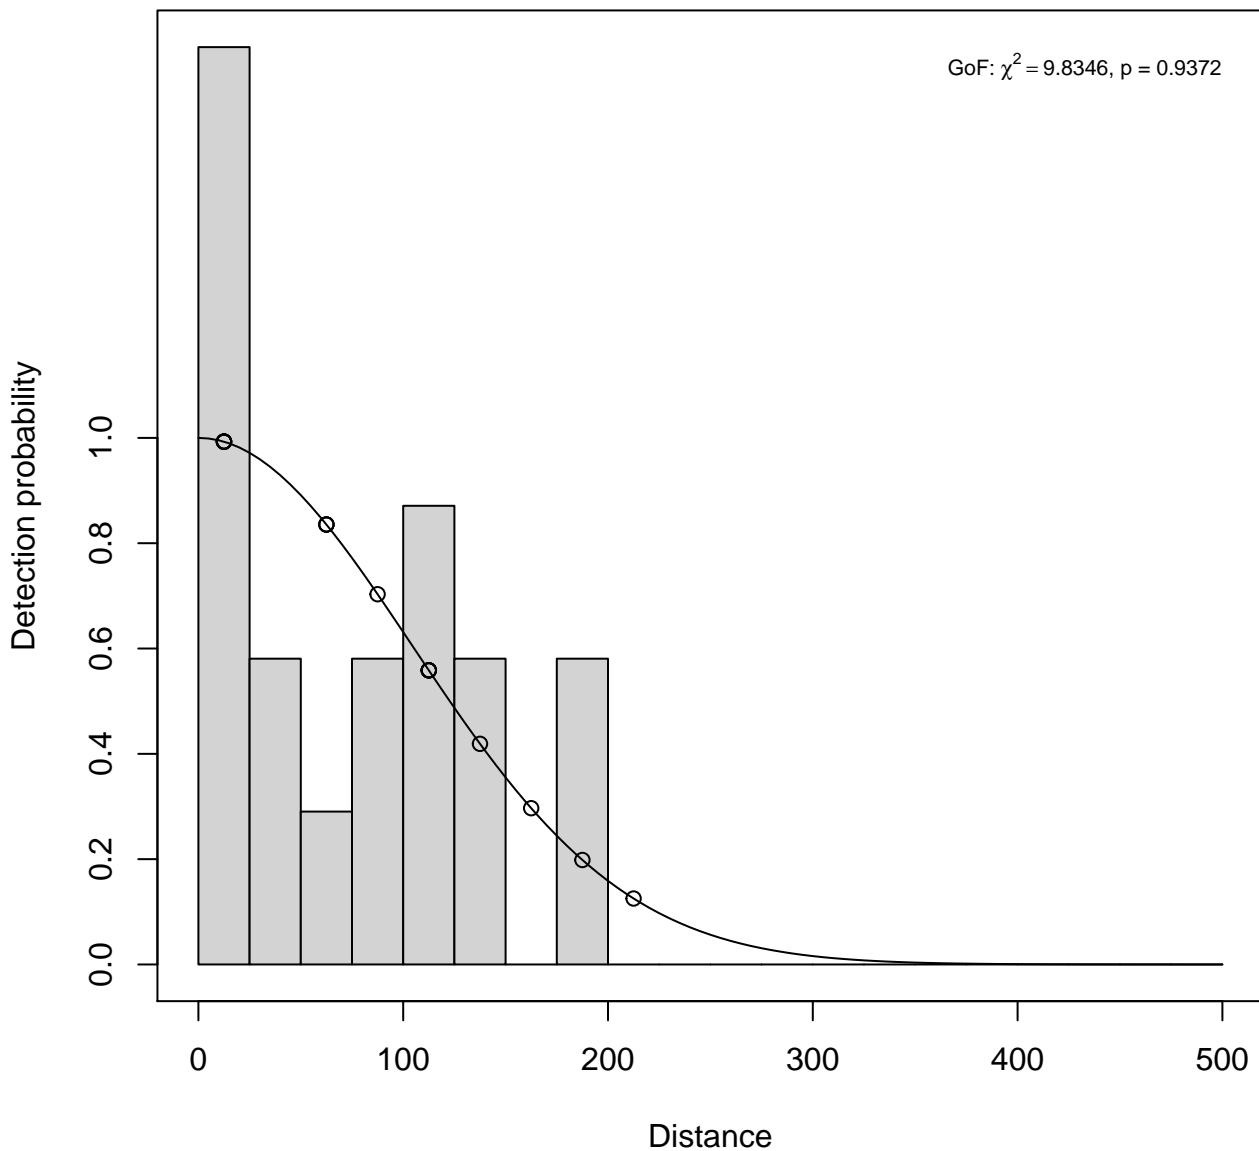

Amazona ochrocephala – Madeira–Tapajos moist forests – Brazil (N = 18, key function = hn)

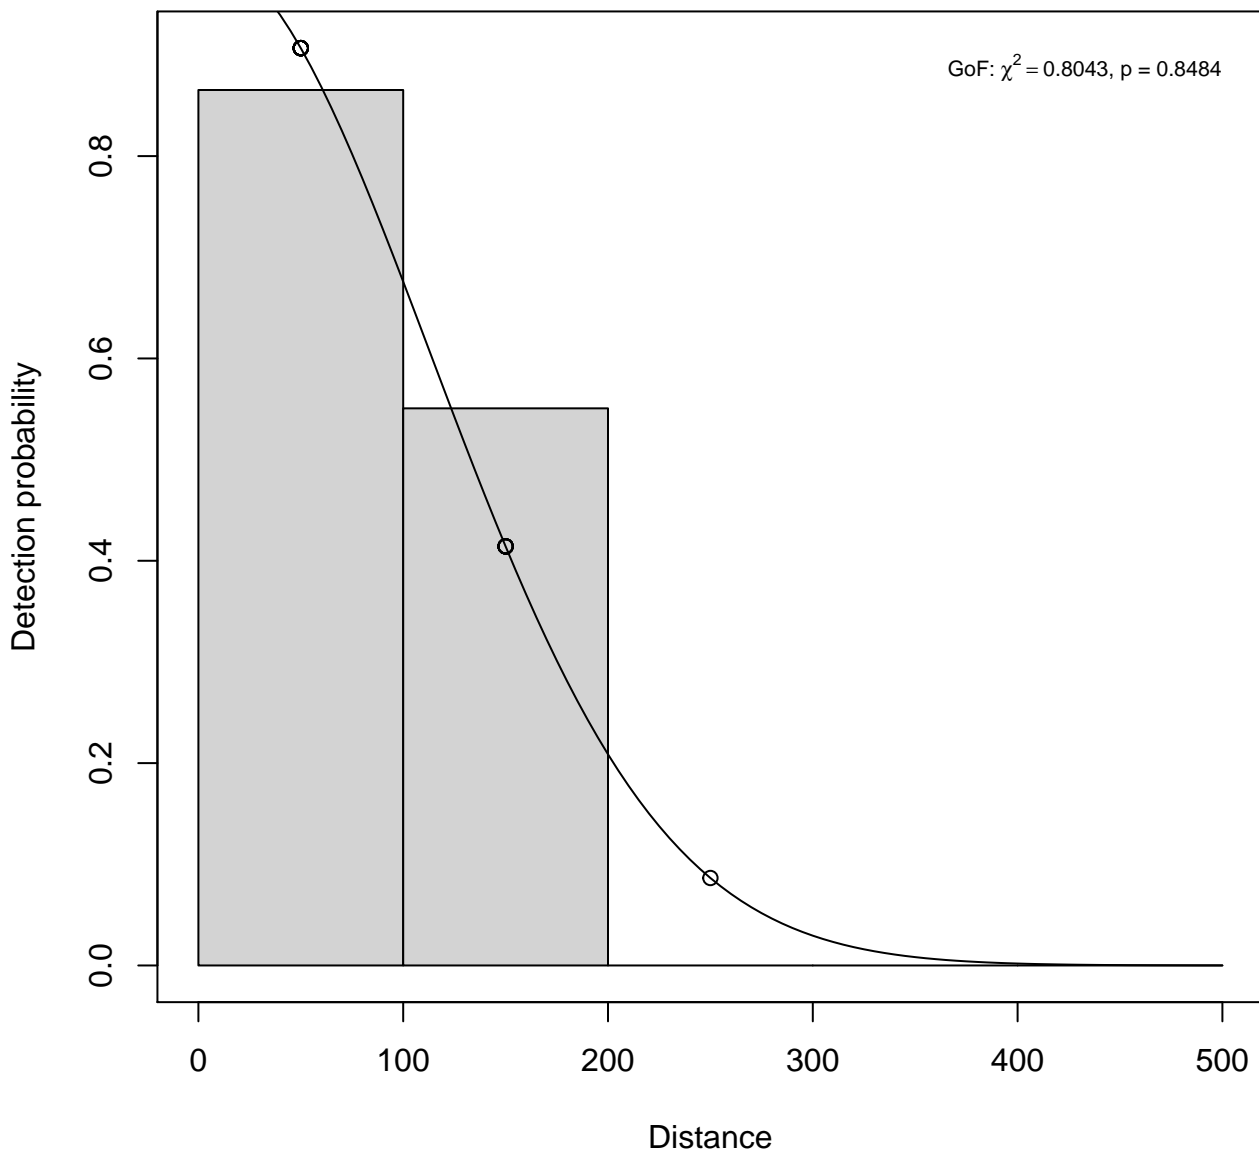

Supplement: s1 [file s1]
