# Supplementary material
Source: MDPI journal article supplement (https://www.mdpi.com/1424-2818/13/7/300)

# **Thectocercus acuticaudatus – Bolivian montane dry forests – Bolivia**

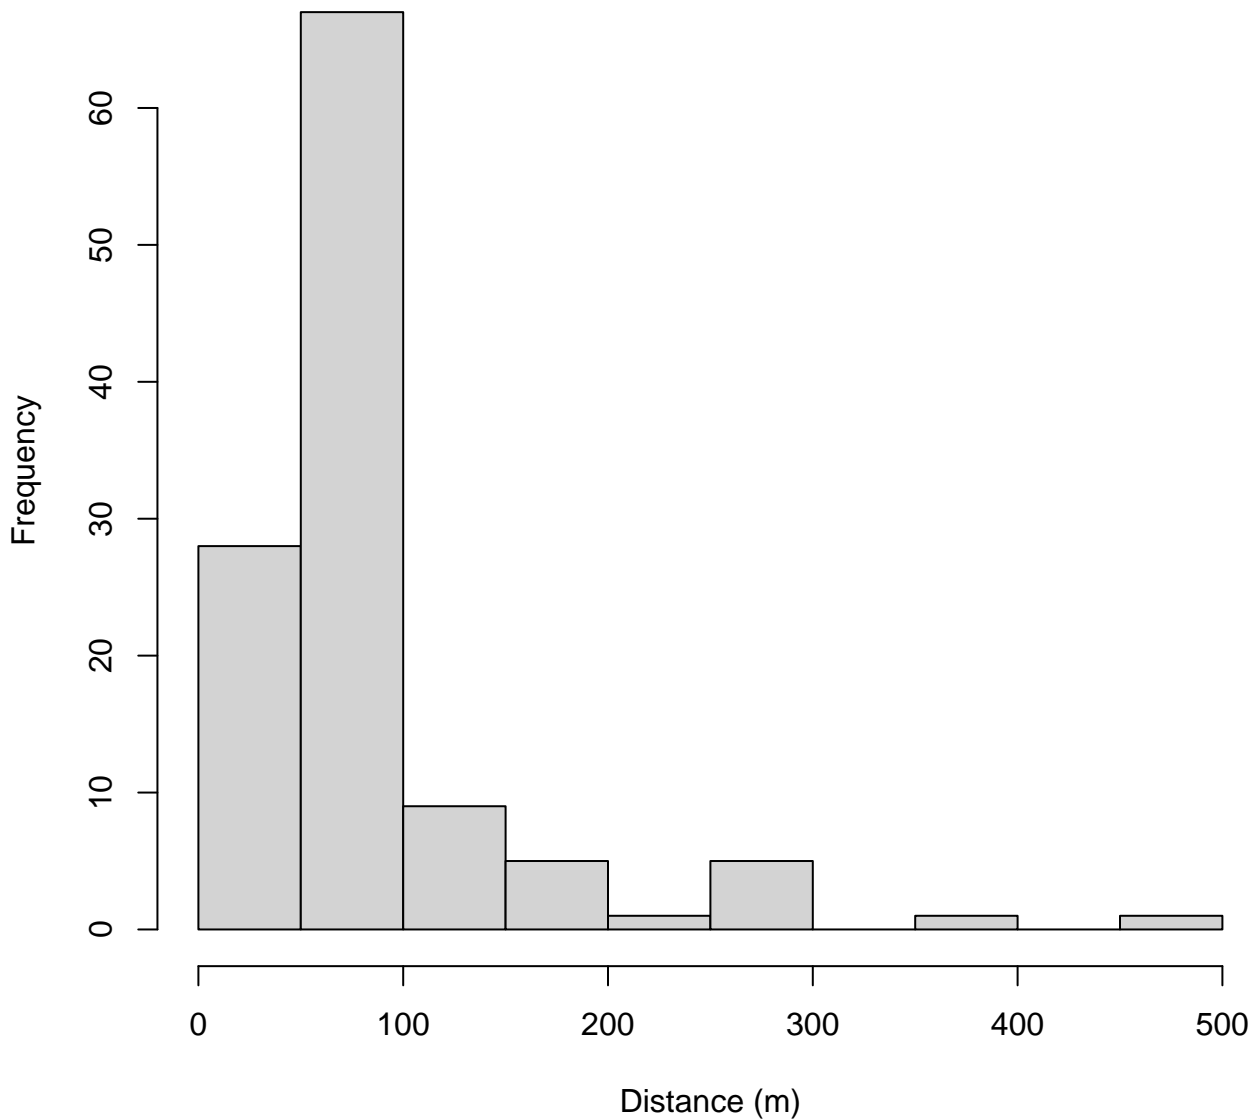

# **Thectocercus acuticaudatus – Bolivian montane dry forests – Bolivia**

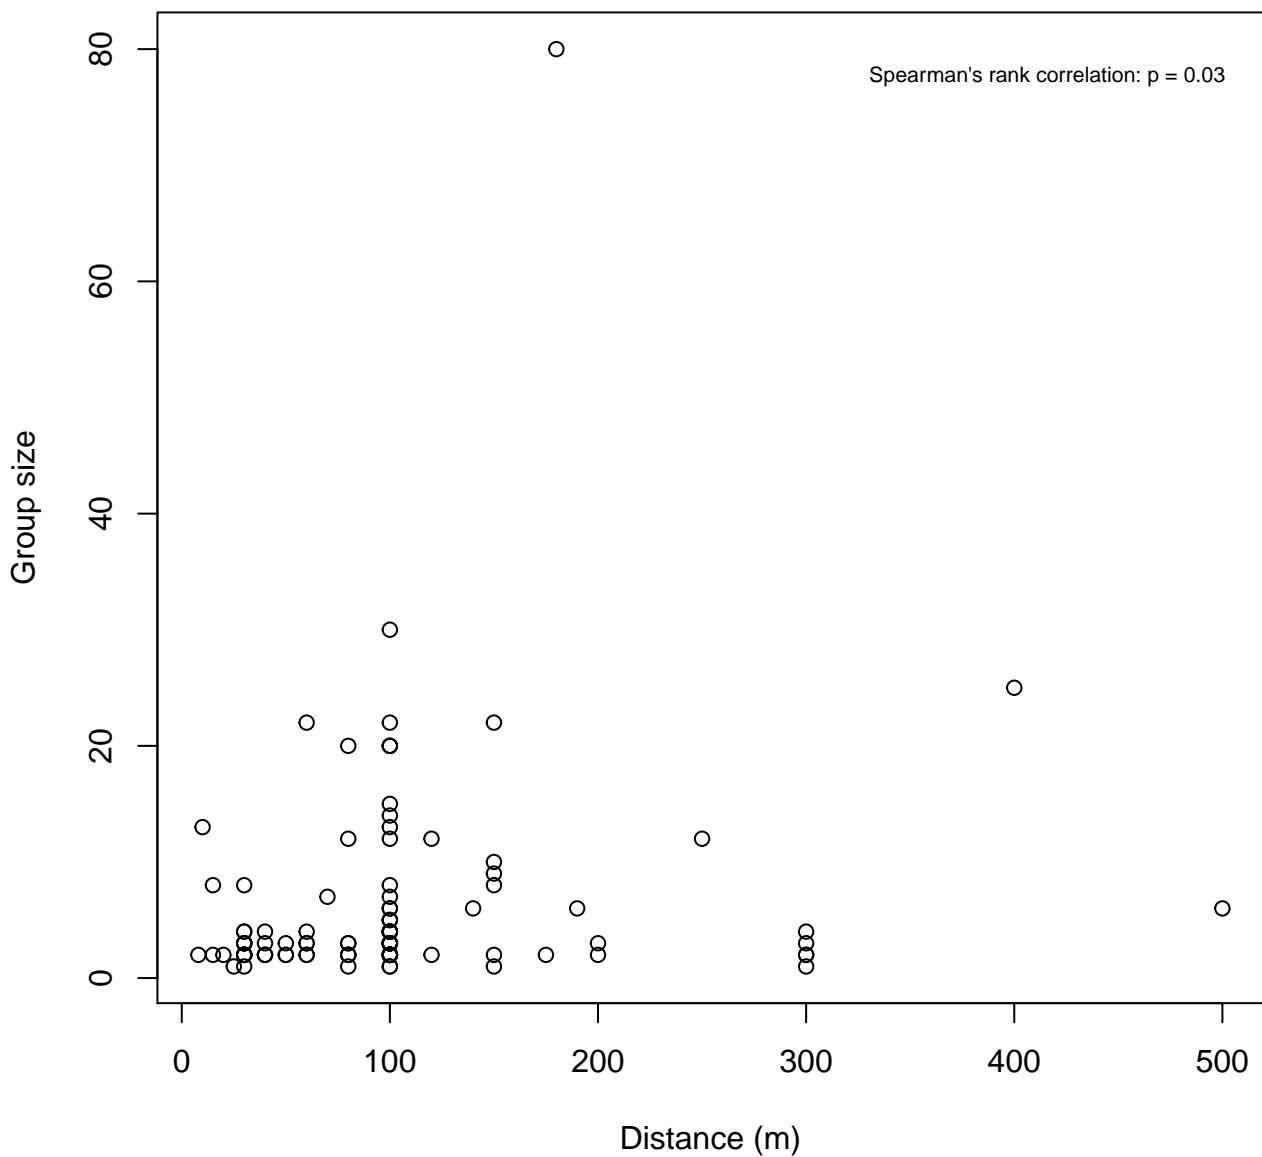

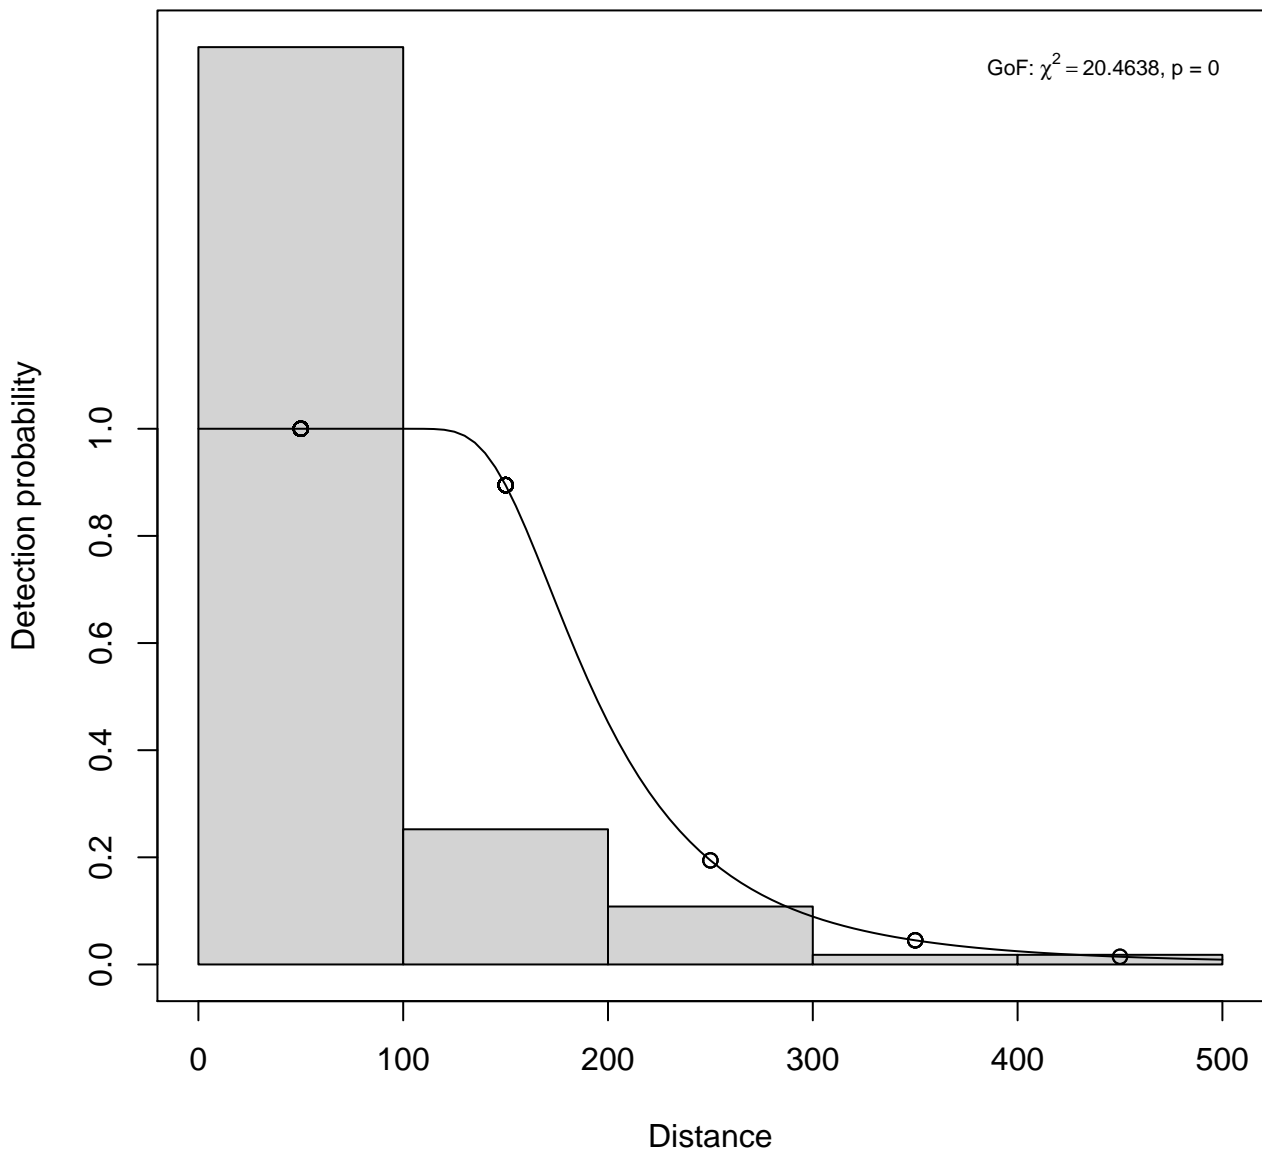

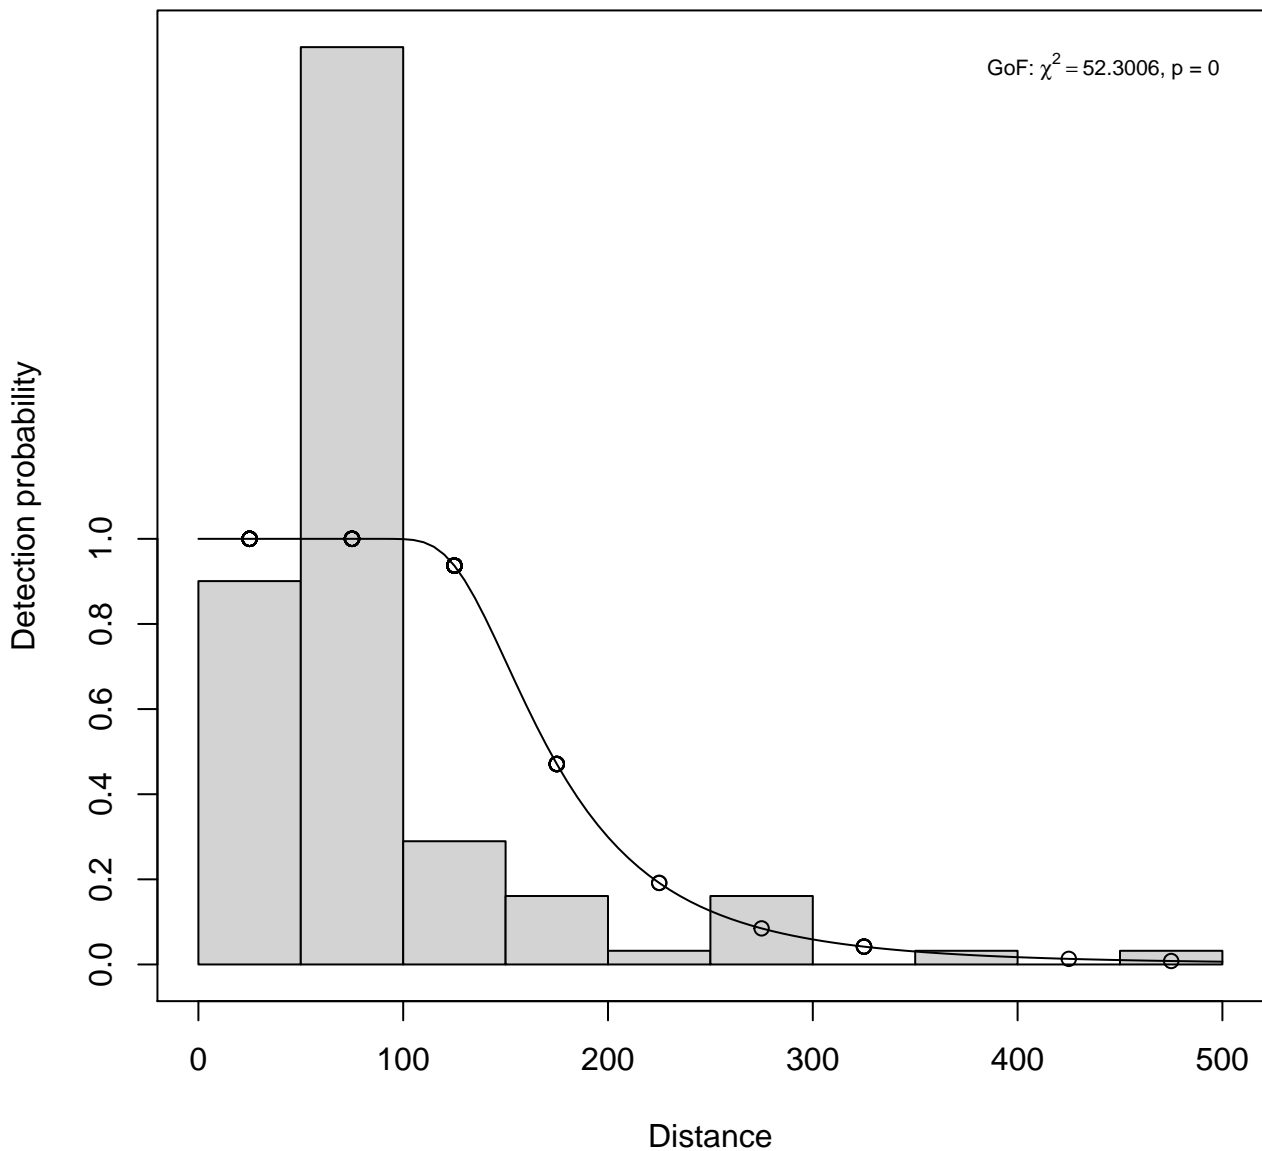

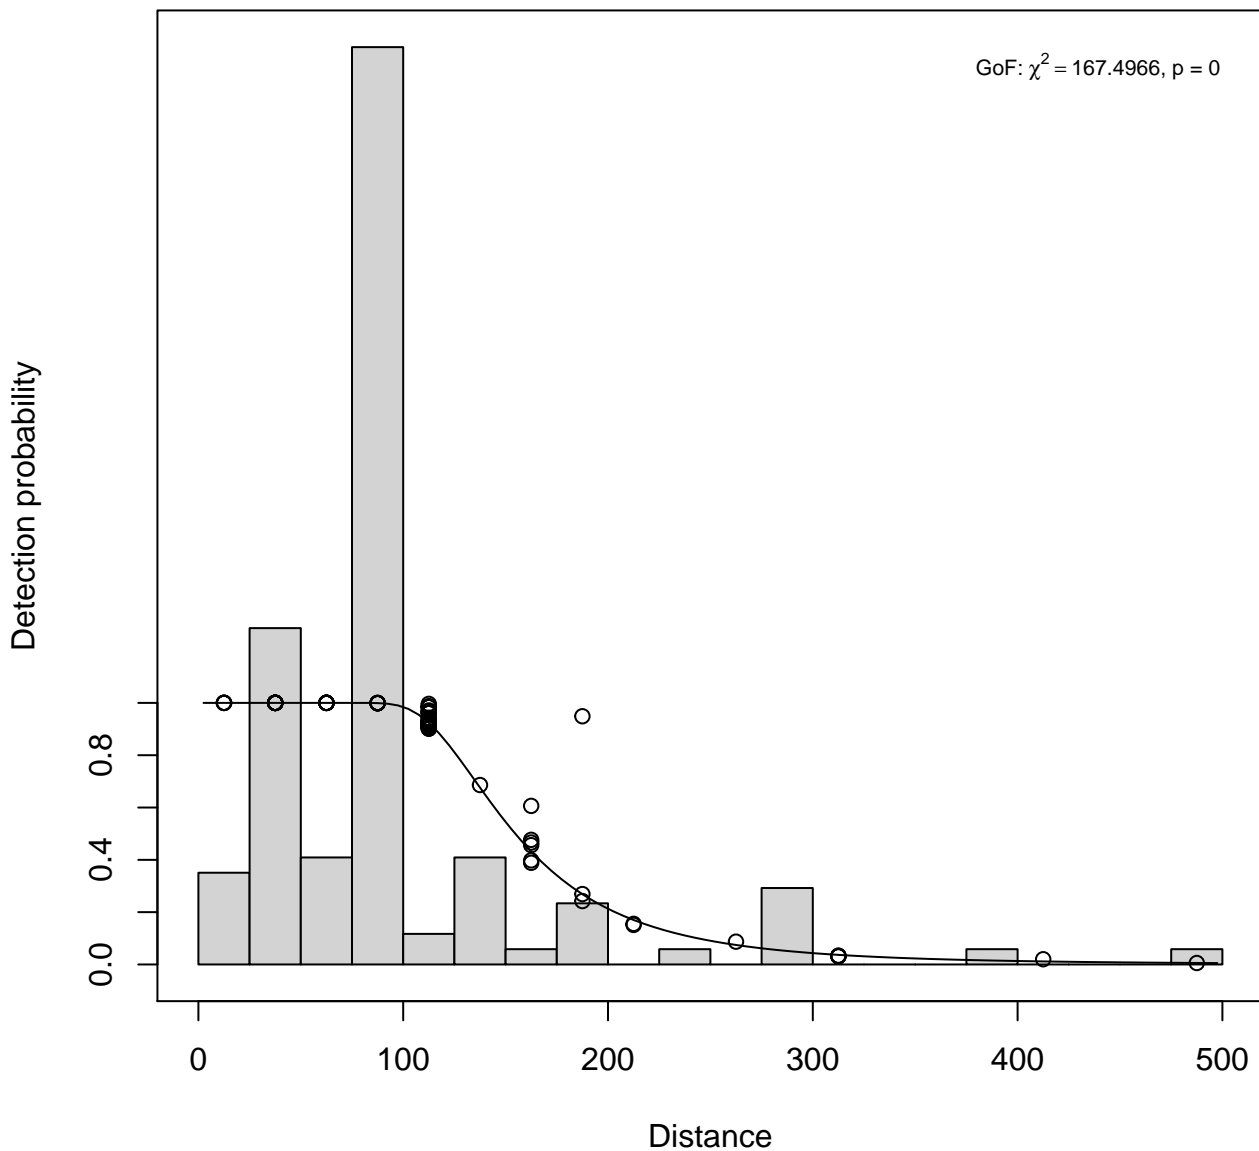

Supplement: s1 [file s1]
