# Supplementary material
Source: MDPI journal article supplement (https://www.mdpi.com/1424-2818/13/7/300)

# **Myiopsitta monachus – Uruguayan savanna – Brazil**

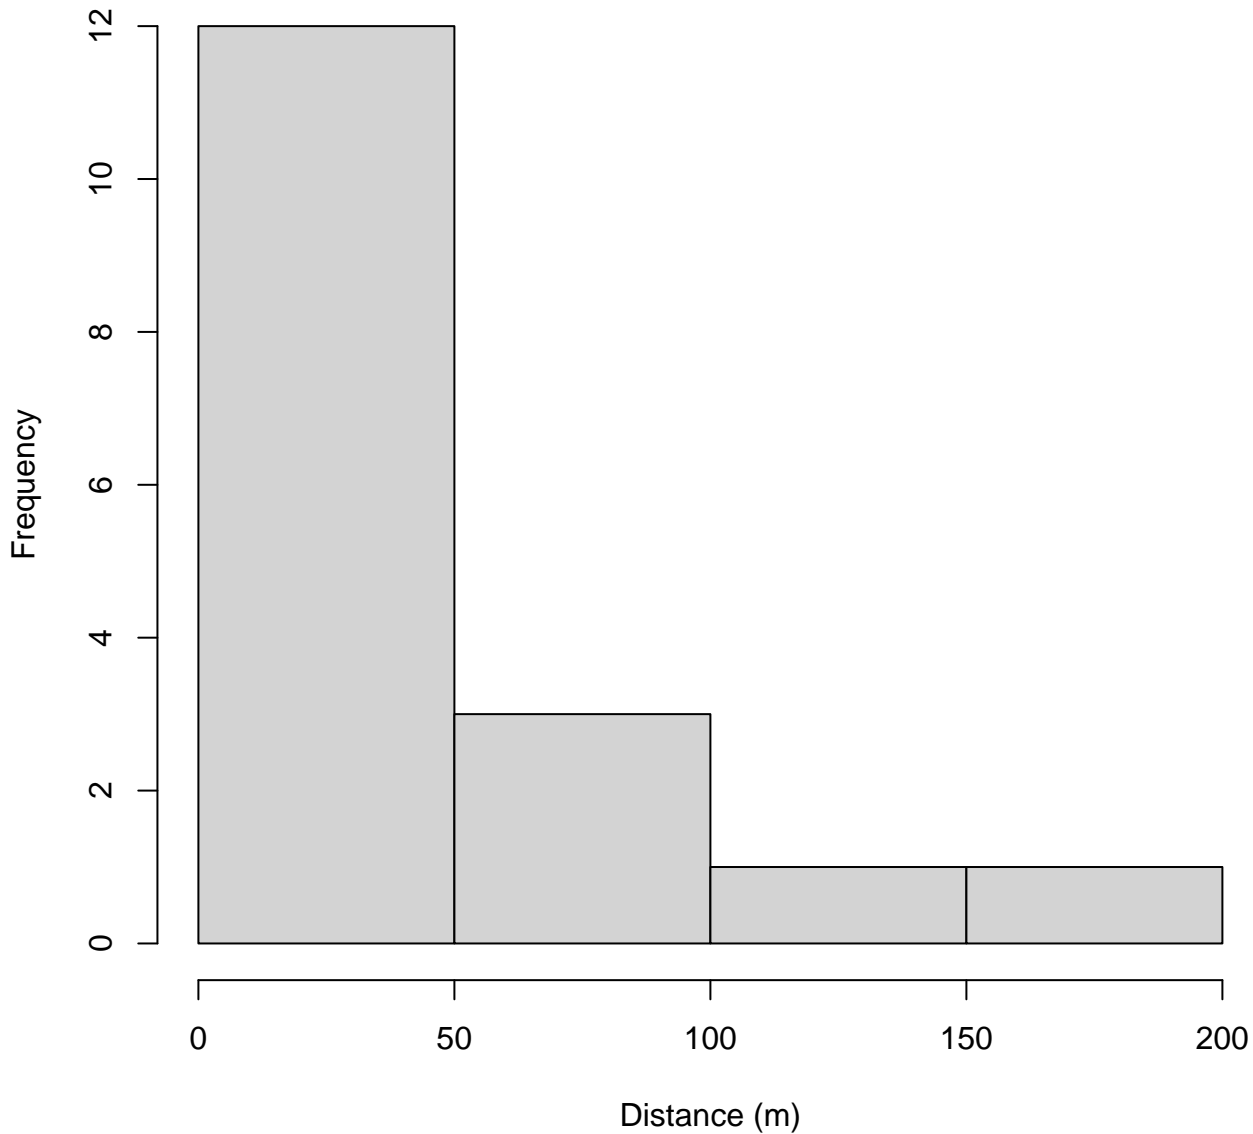

# Myiopsitta monachus – Uruguayan savanna – Brazil

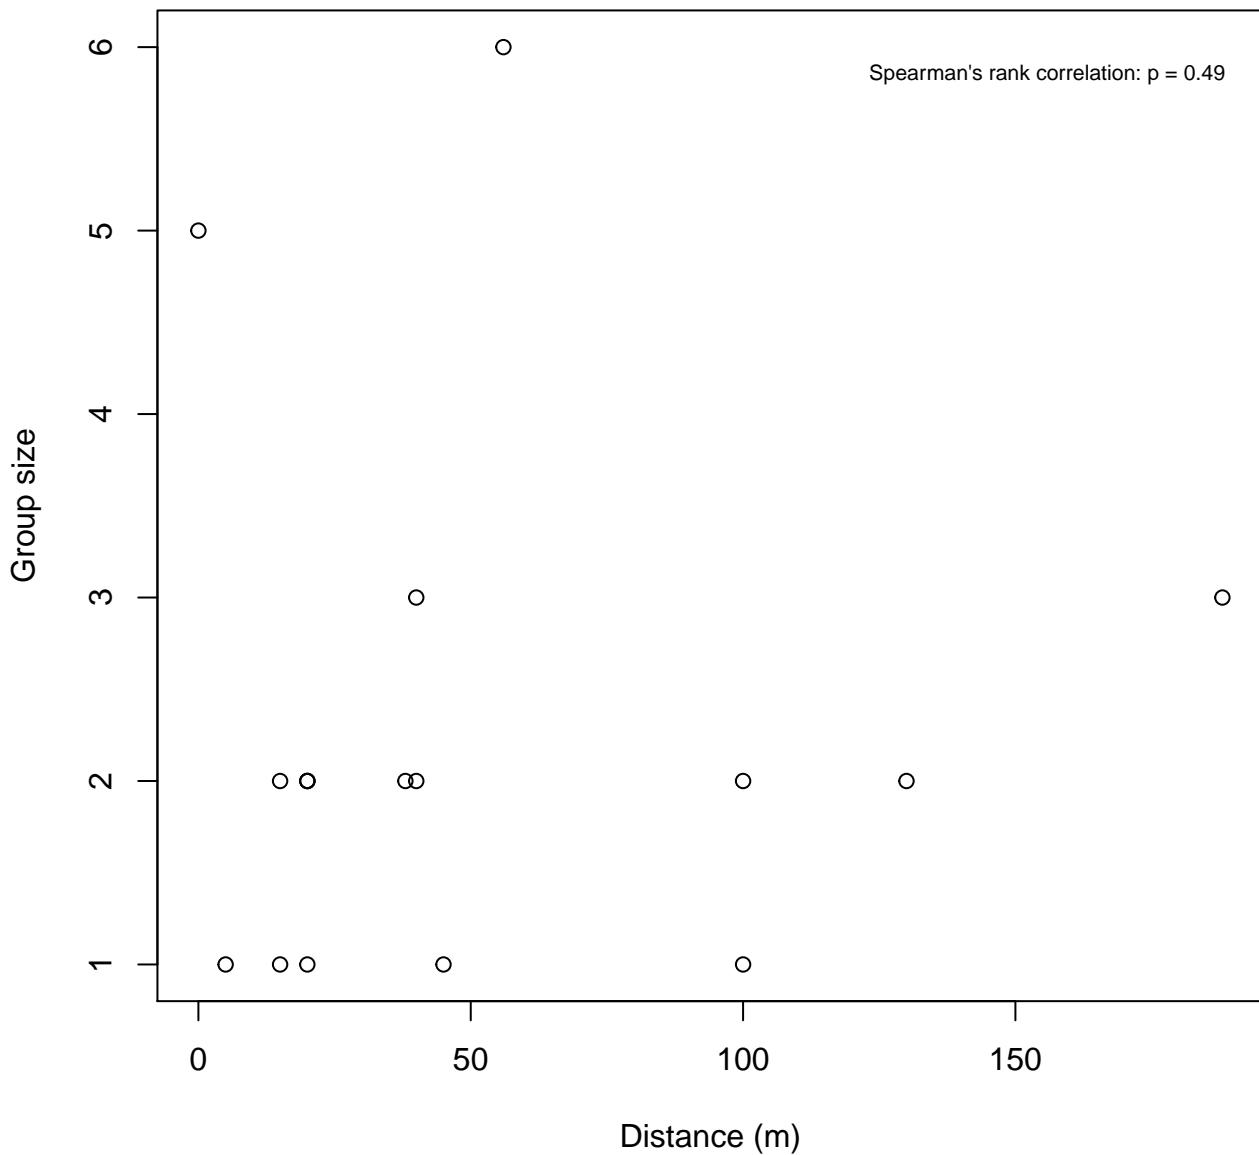

*Myiopsitta monachus* – Uruguayan savanna – Brazil (N = 17, key function = hn)

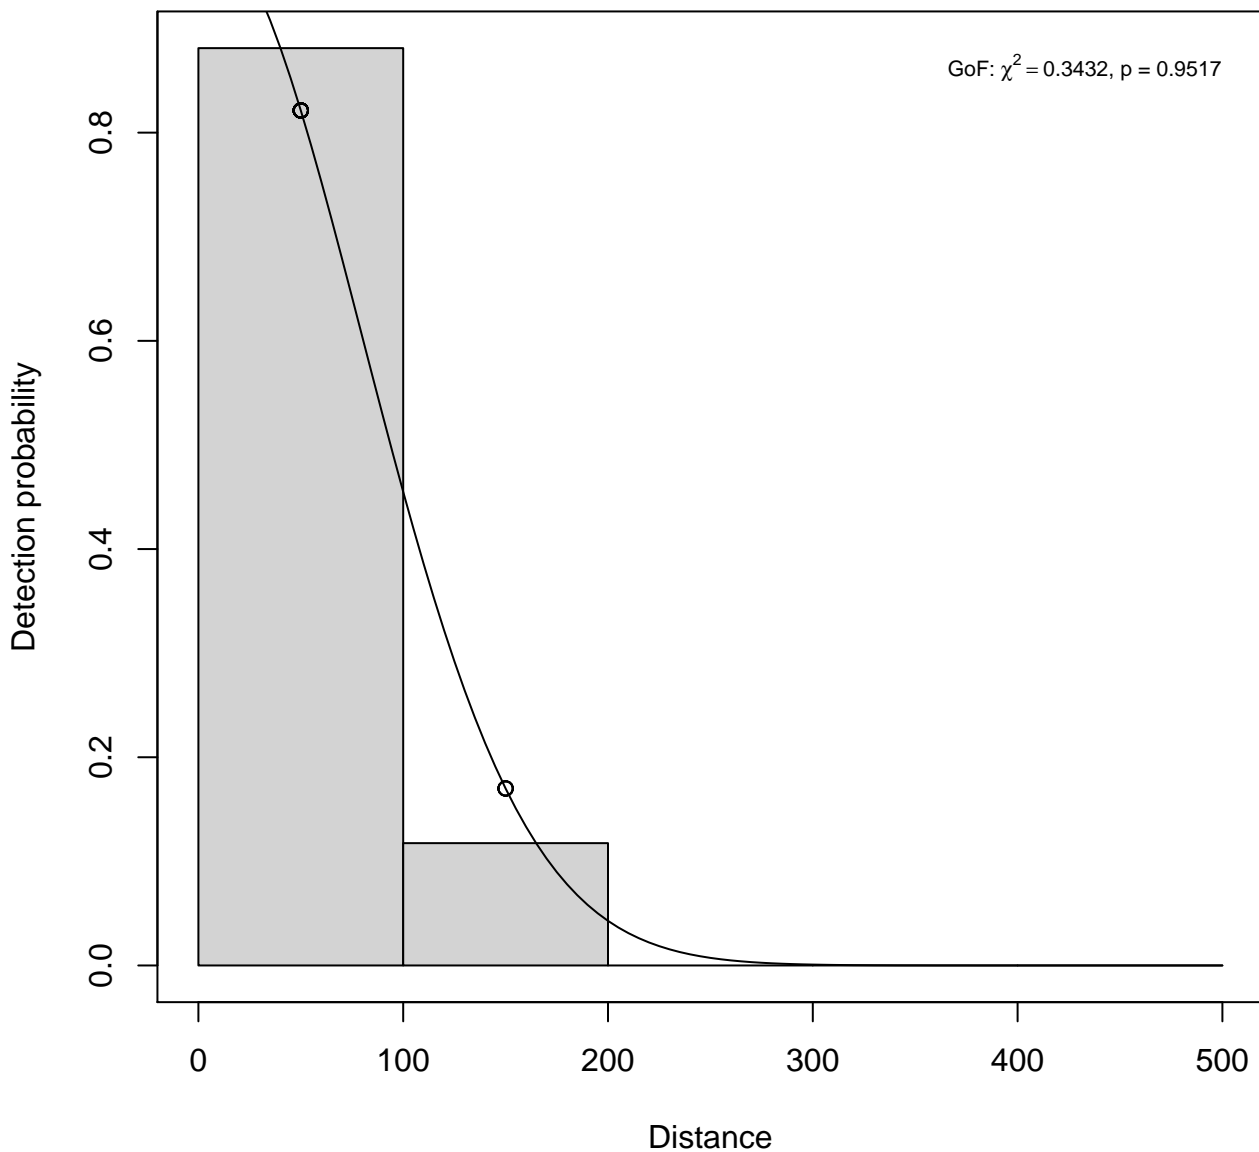

*Myiopsitta monachus* – Uruguayan savanna – Brazil (N = 17, key function = hr)

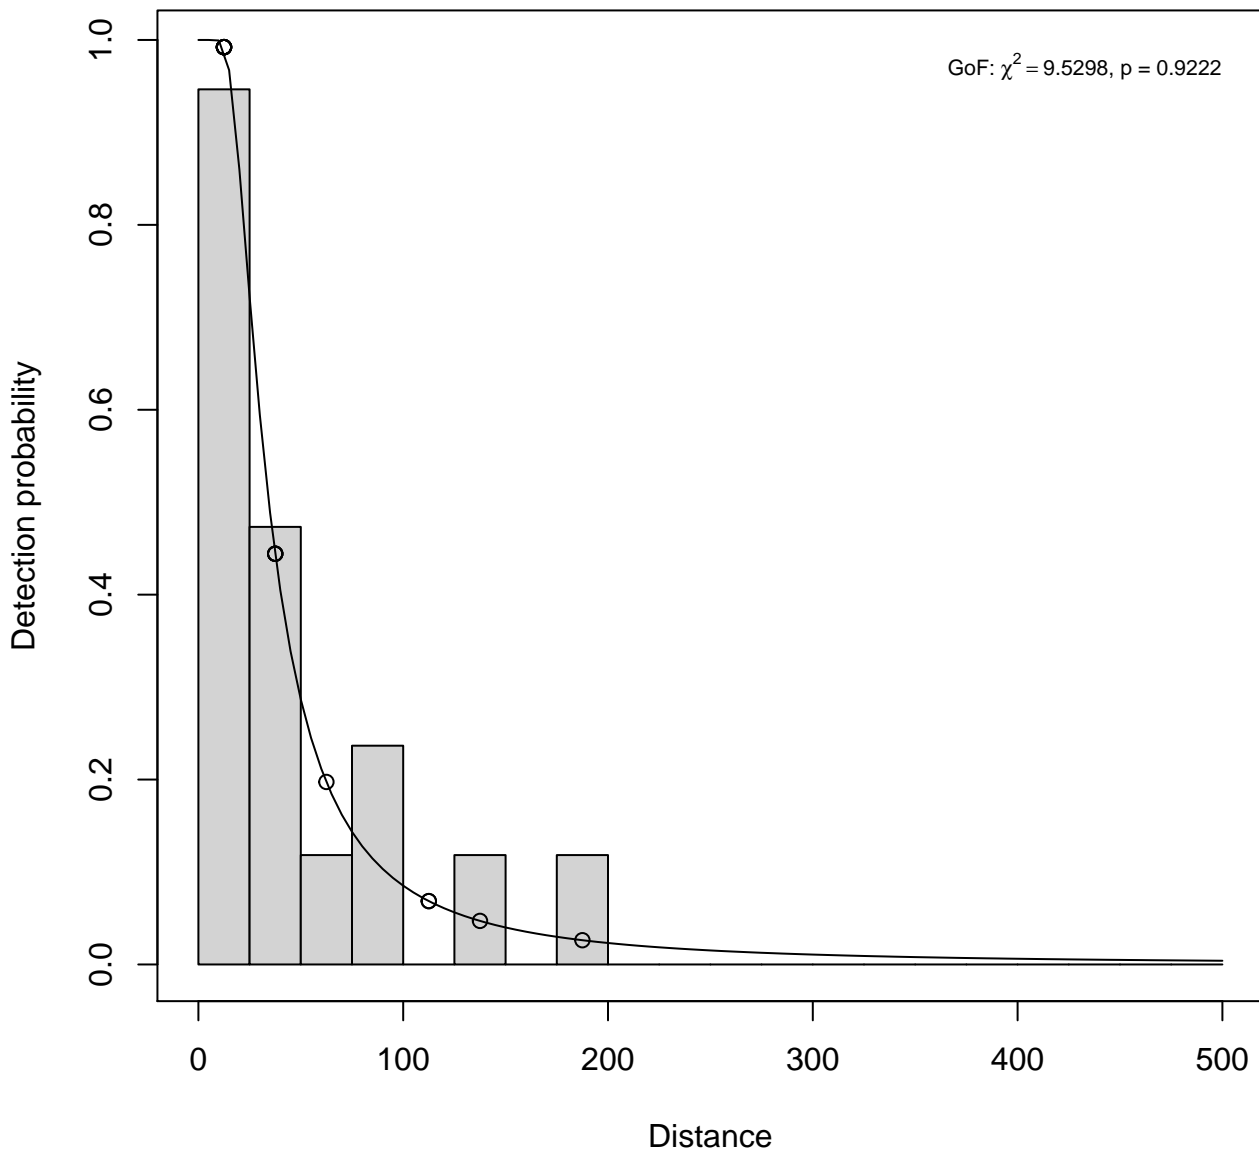

*Myiopsitta monachus* – Uruguayan savanna – Brazil (N = 17, key function = hn)

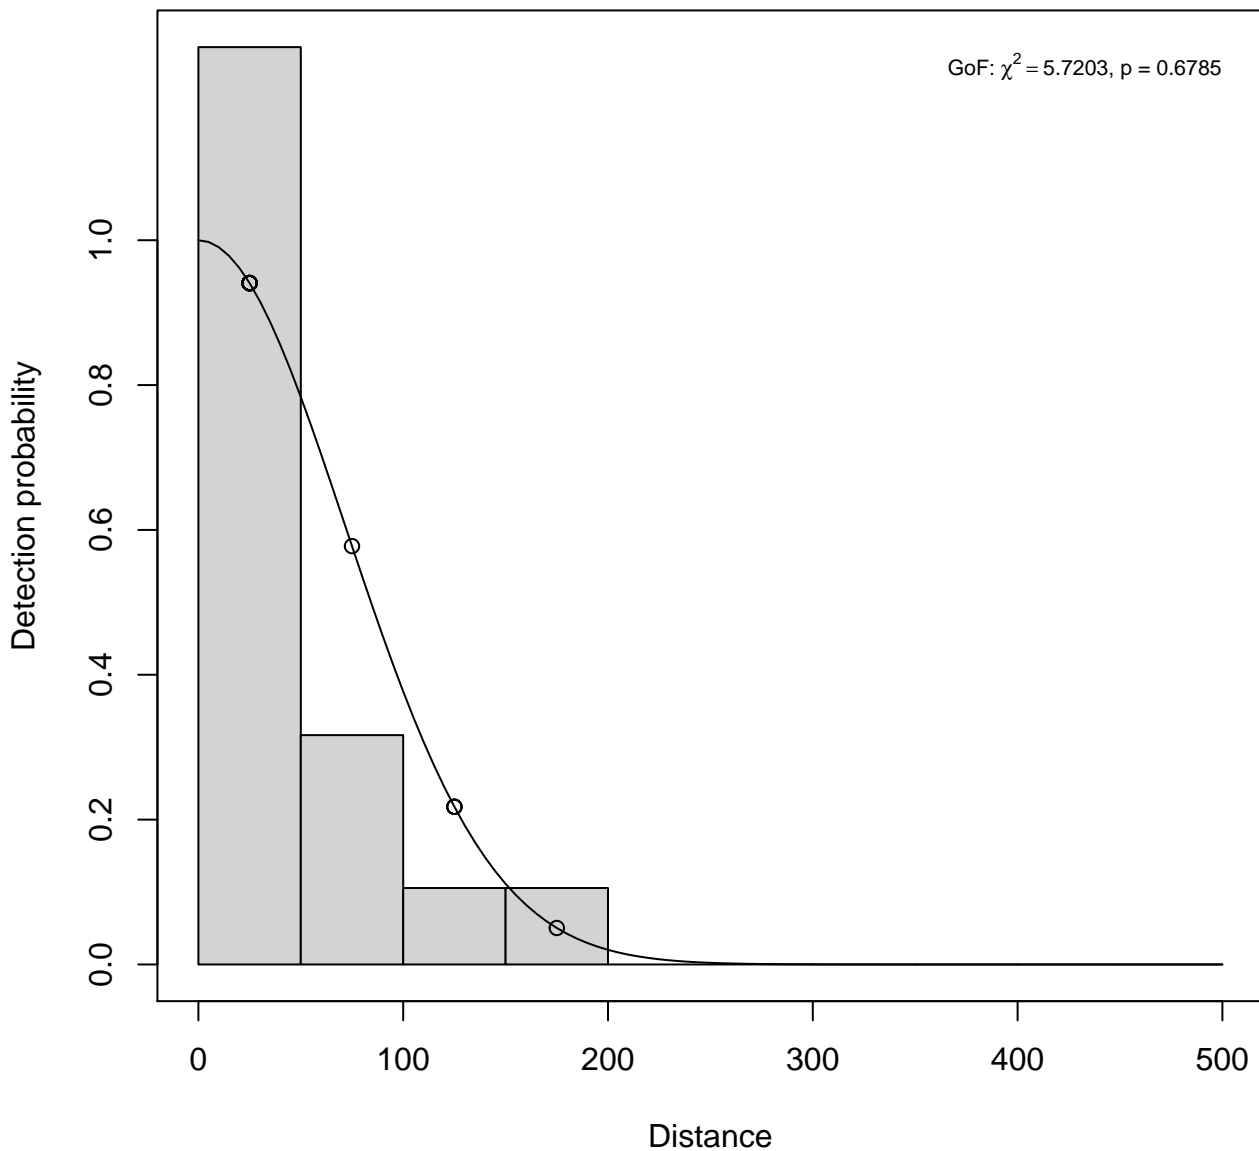

Supplement: s1 [file s1]
