# Supplementary material
Source: MDPI journal article supplement (https://www.mdpi.com/1424-2818/13/7/300)

# Brotoyeris chiriri – Alto Parana Atlantic forests – Paraguay

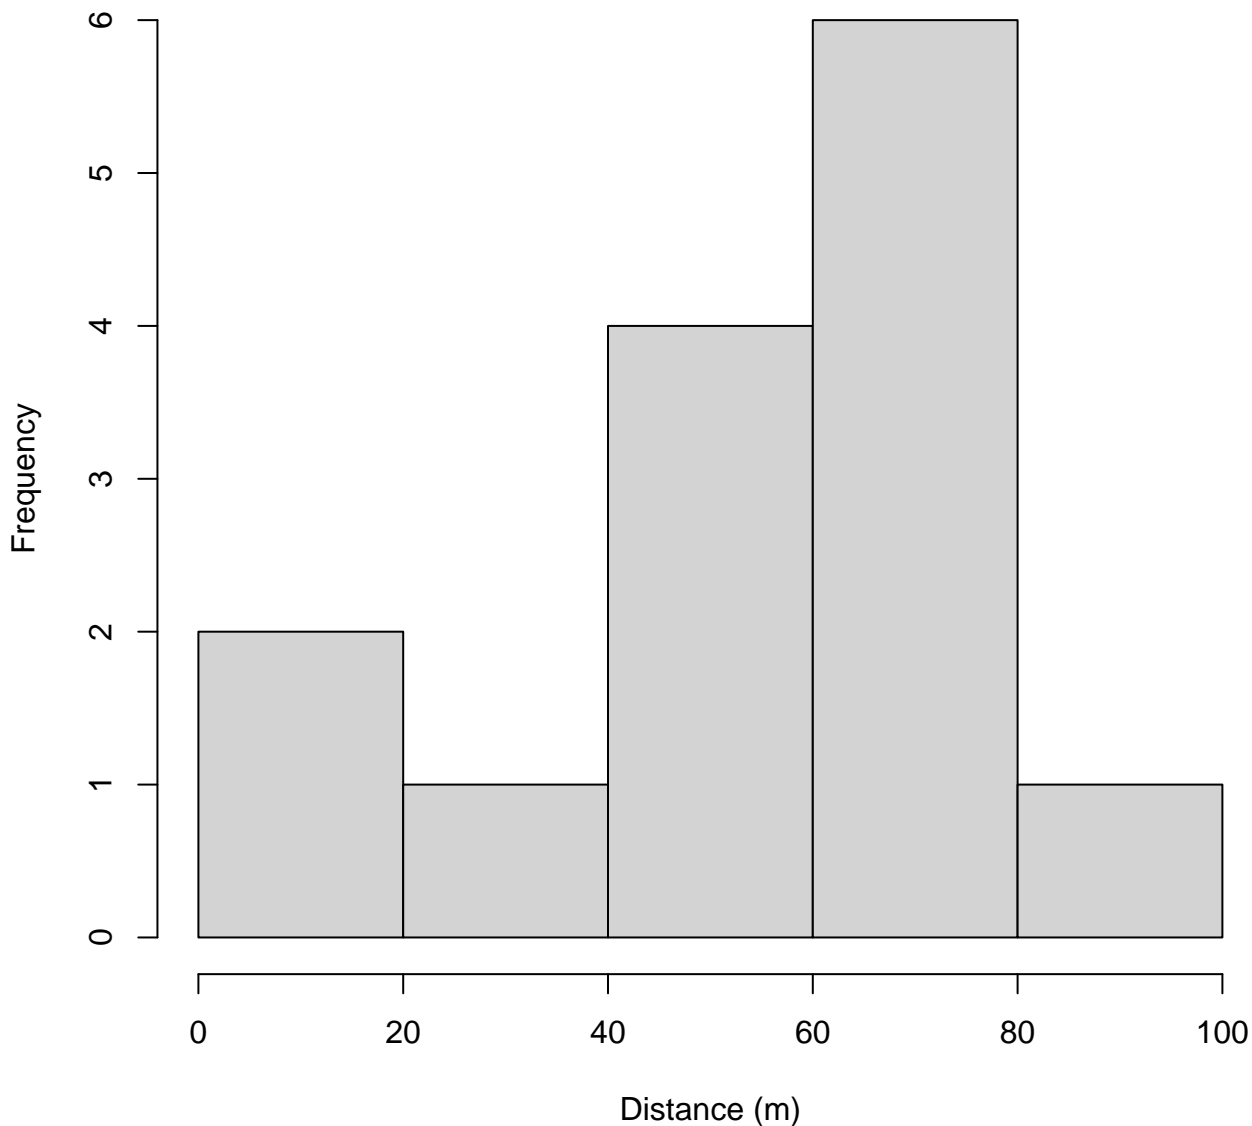

# Brotogeris chiriri – Alto Parana Atlantic forests – Paraguay

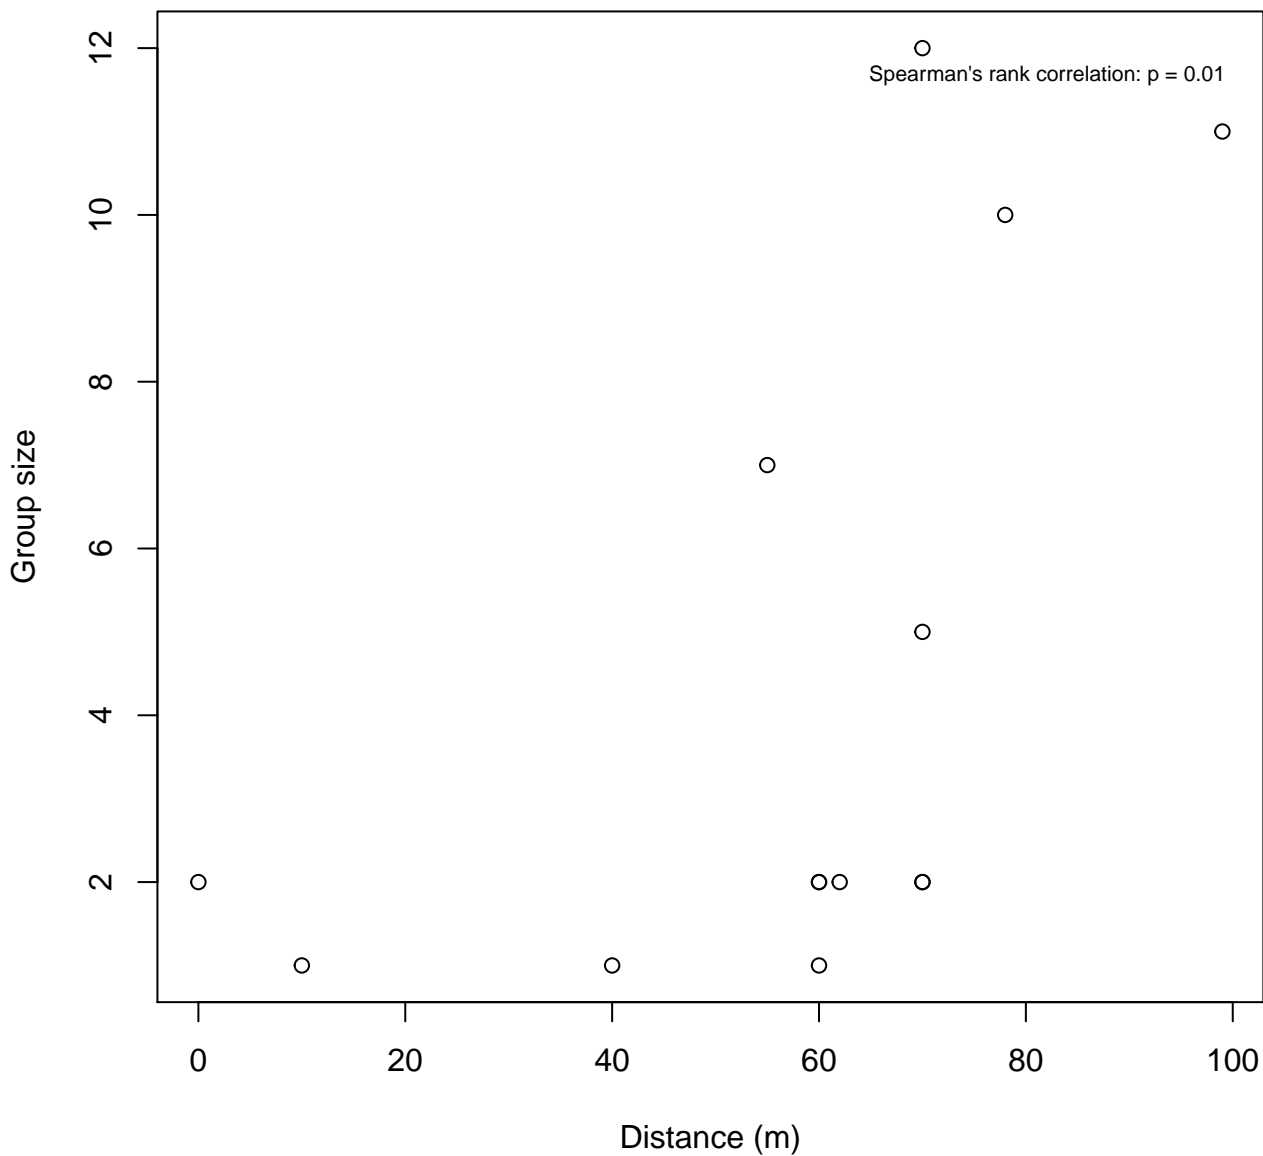

*Brotogeris chiriri* – Alto Parana Atlantic forests – Paraguay (N = 14, key function = hr)

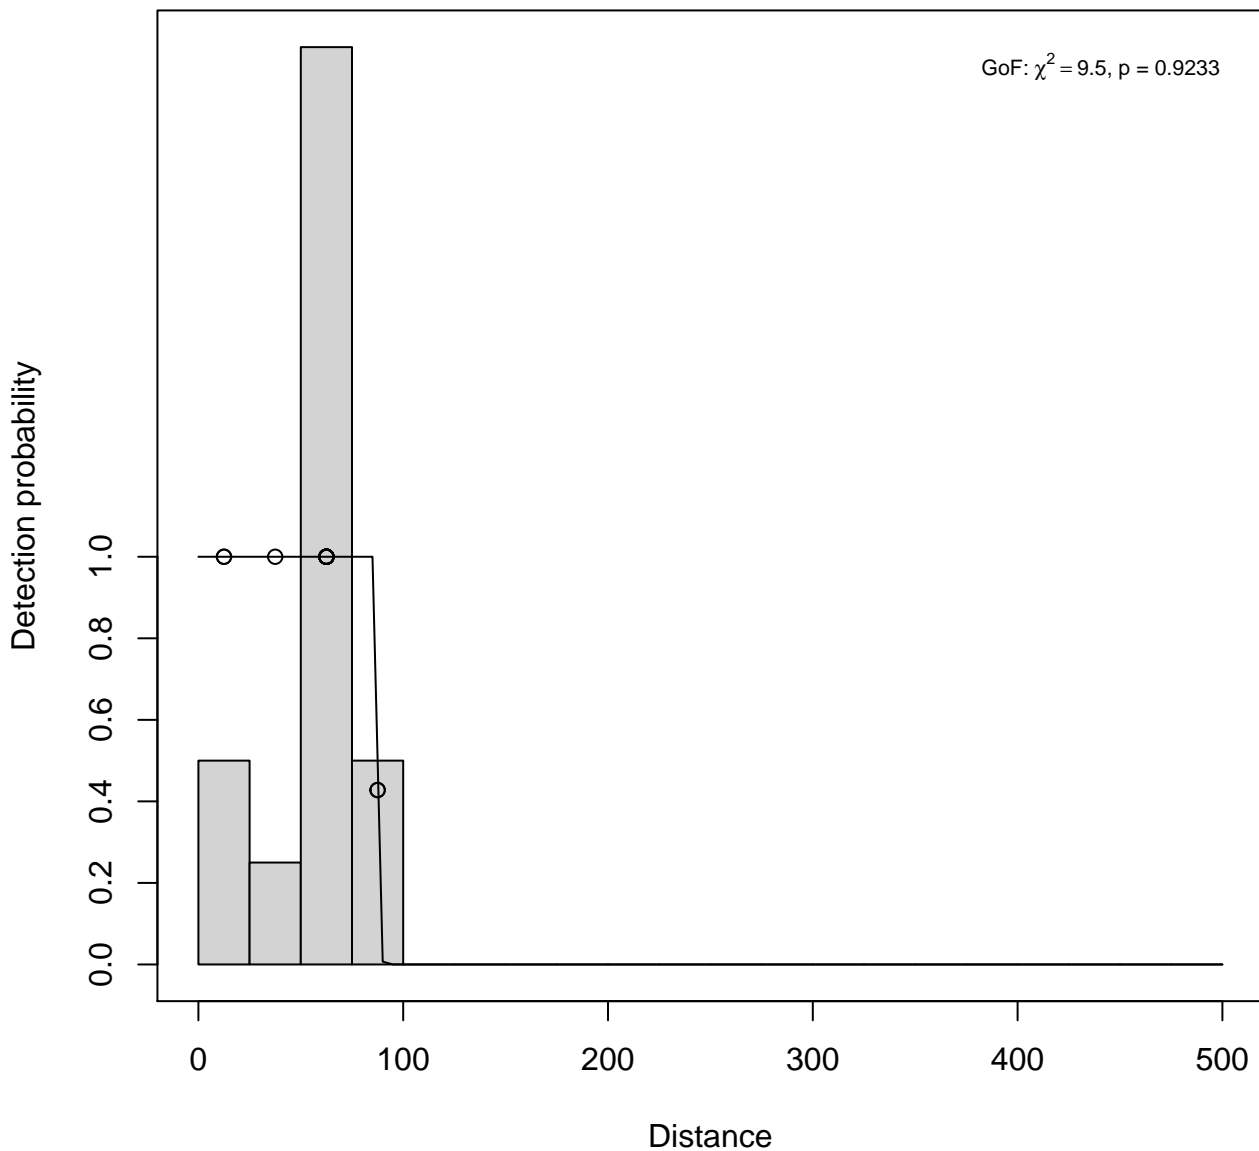

GoF:  $\chi^2 = \text{NA}$ , p = NA

Brotogeris chiriri – Alto Parana Atlantic forests – Paraguay (N = 14, key function = hn)

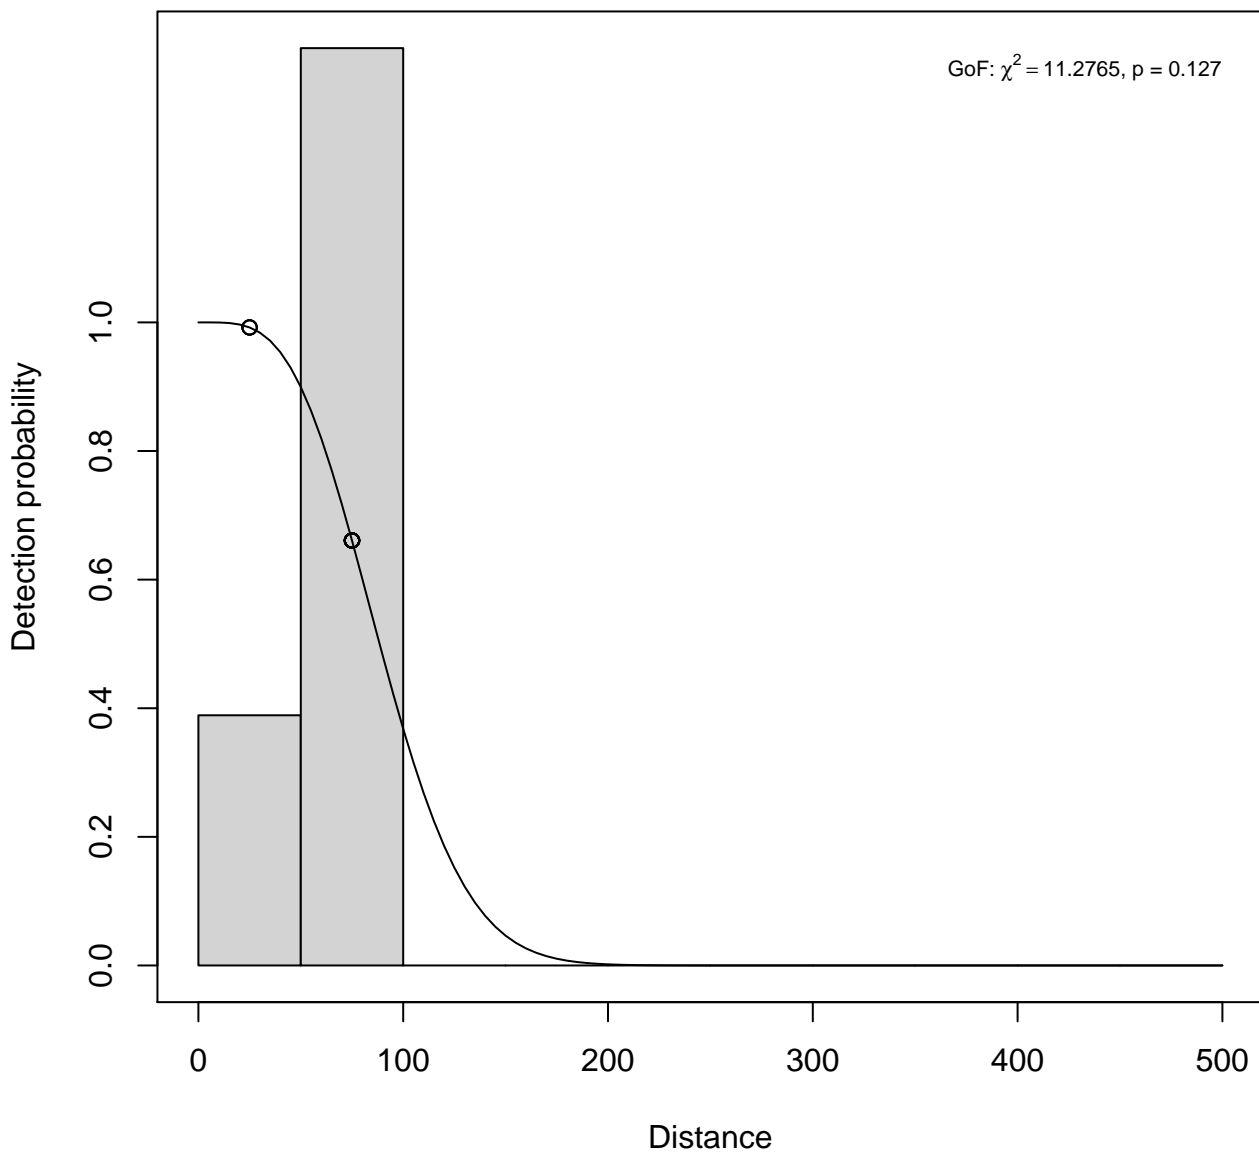

Supplement: s1 [file s1]
