# Supplementary material
Source: MDPI journal article supplement (https://www.mdpi.com/1424-2818/13/7/300)

# Forpus xanthopterygius – Beni savanna – Bolivia

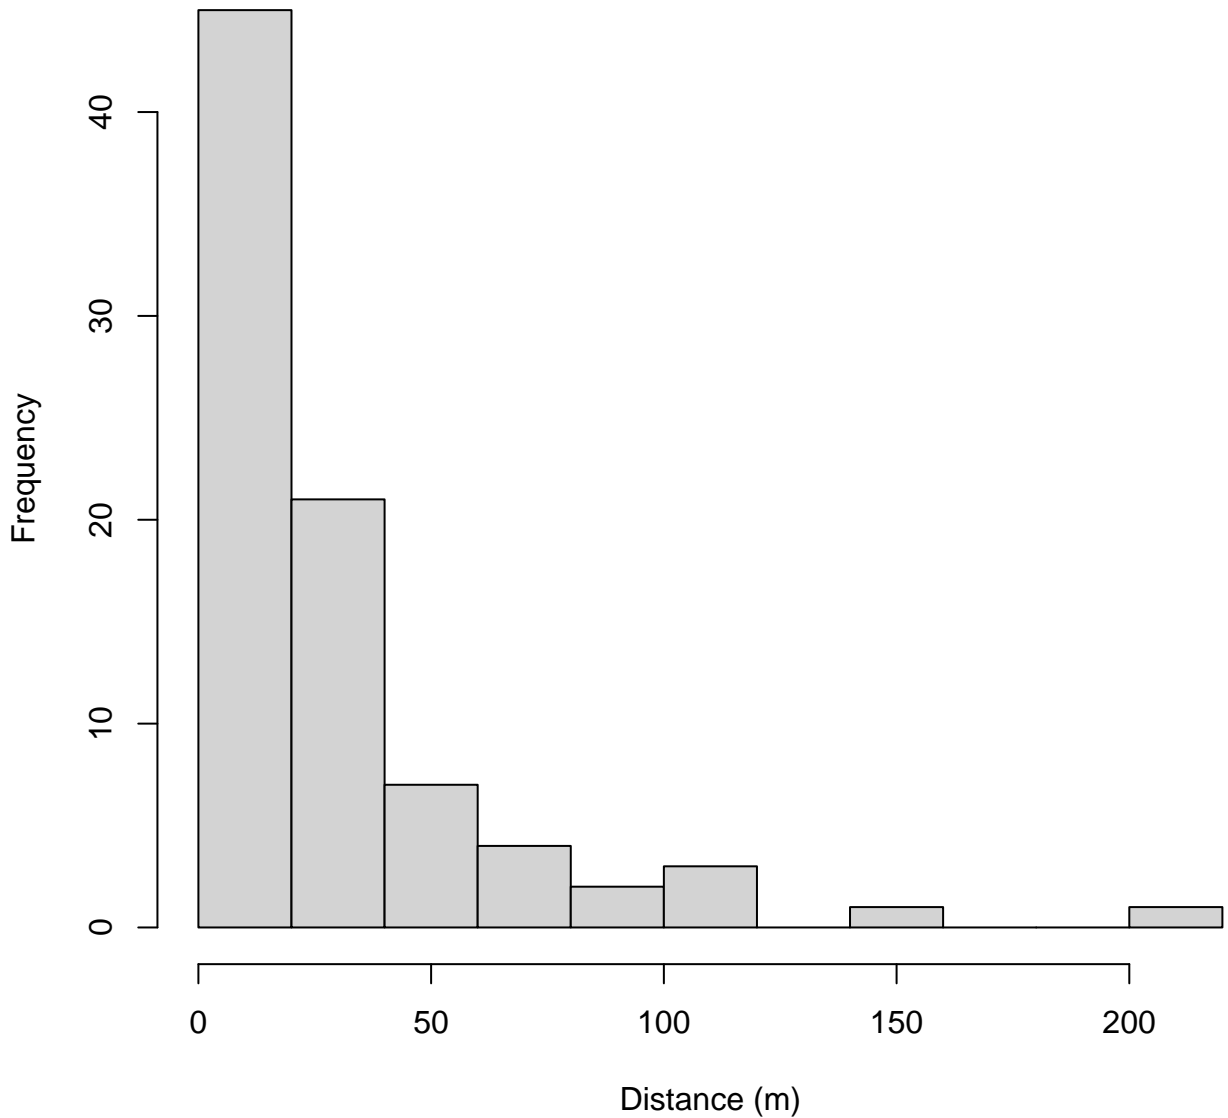

# Forpus xanthopterygius – Beni savanna – Bolivia

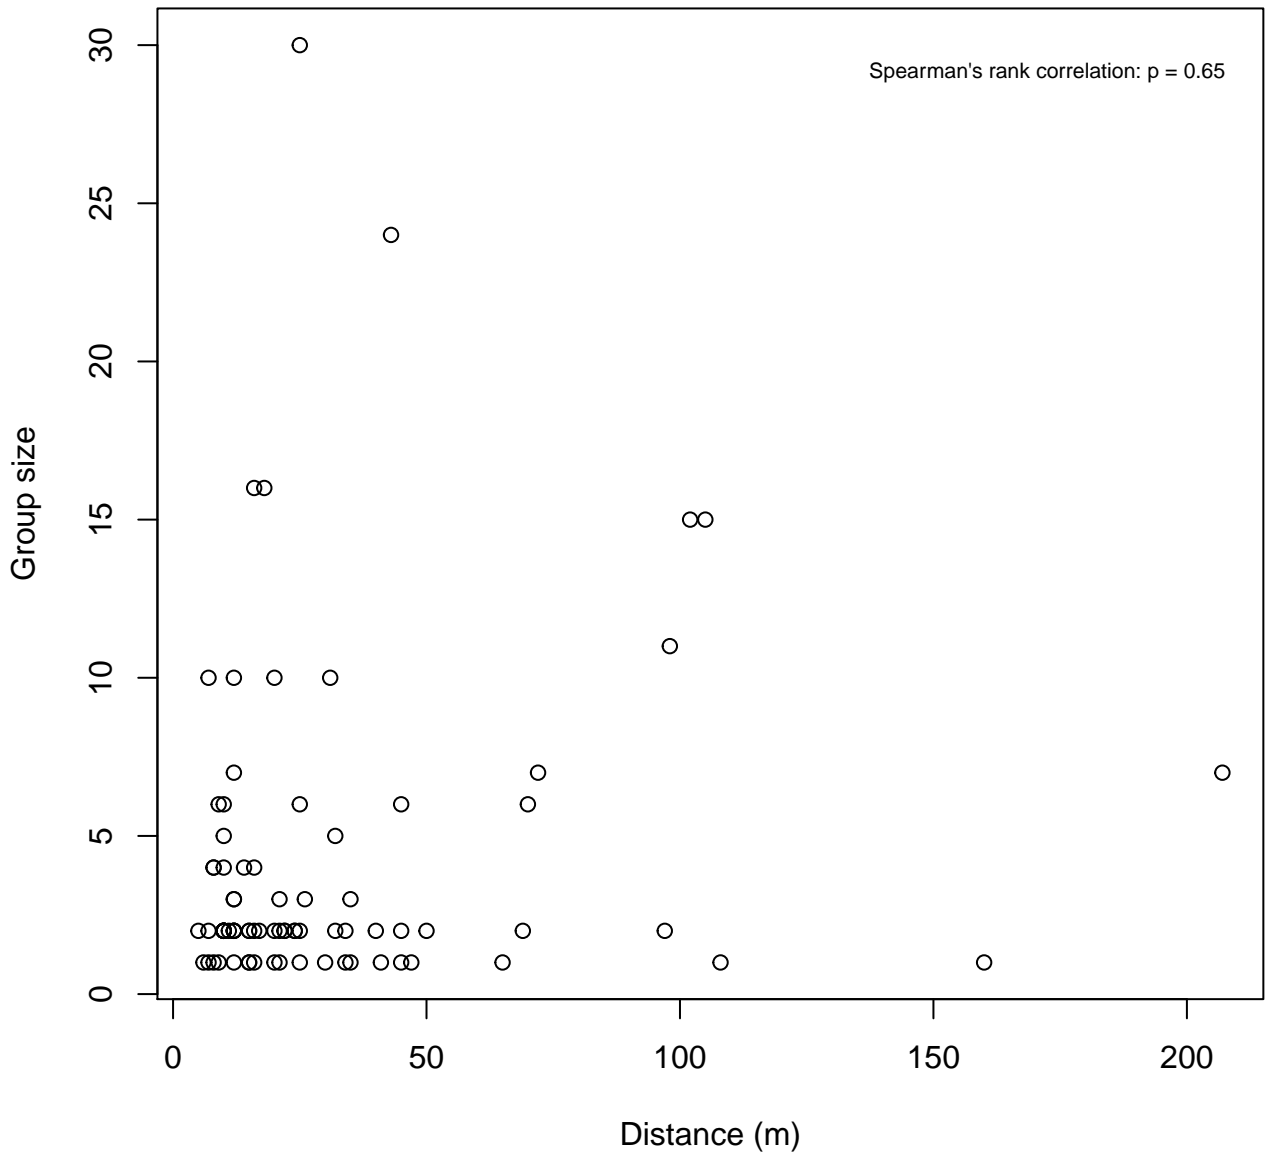

Forpus xanthopterygius – Beni savanna – Bolivia (N = 84, key function = hr)

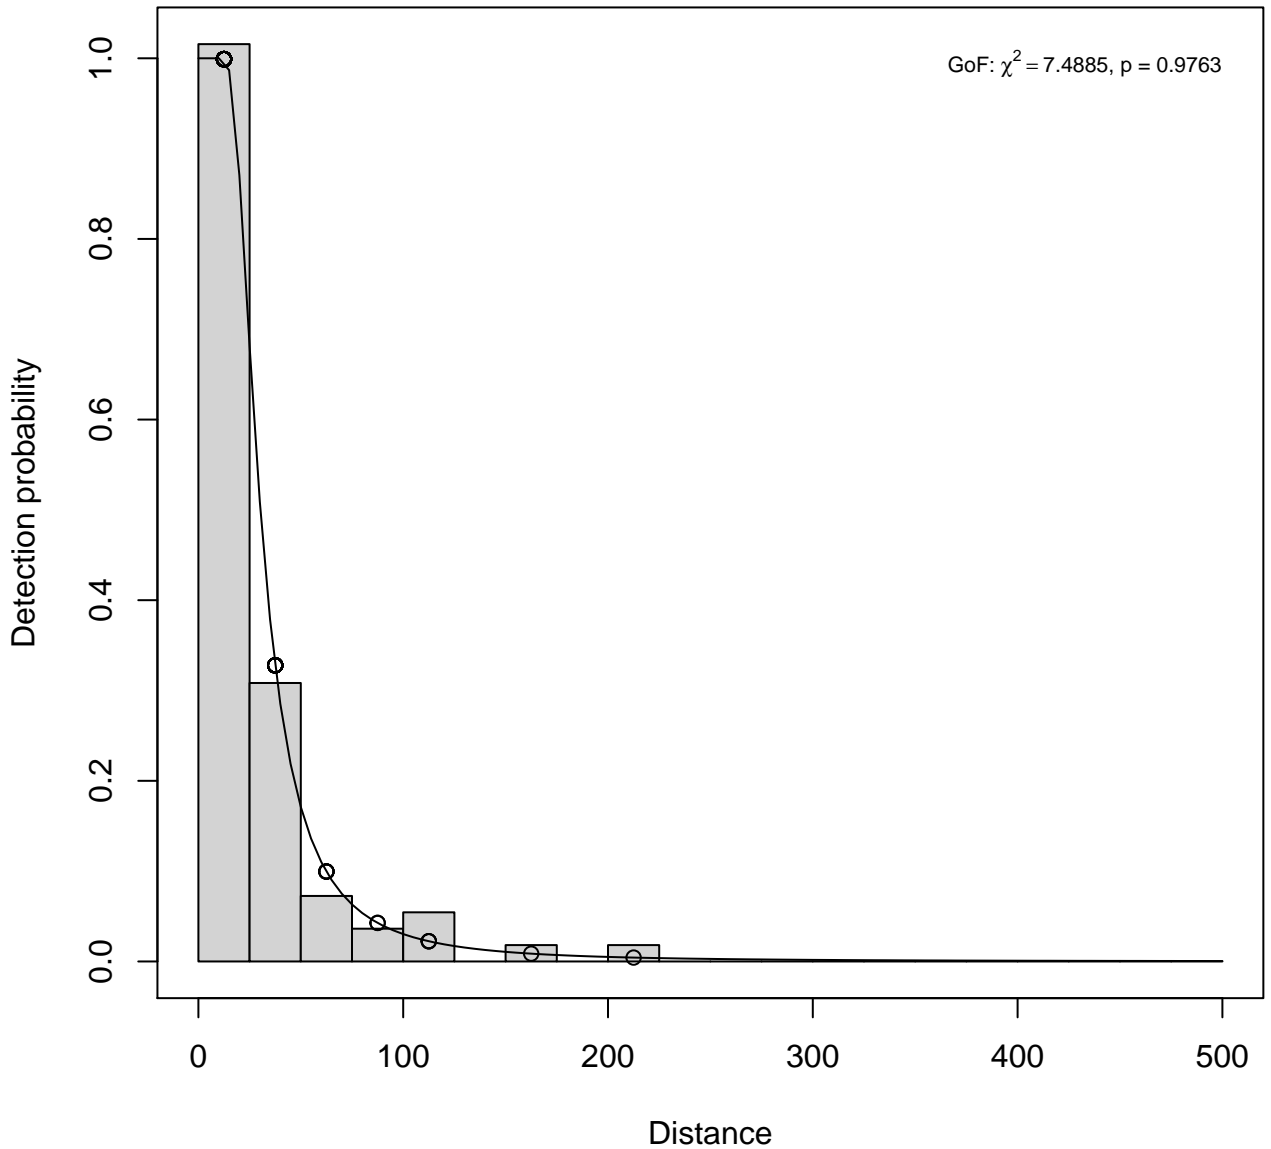

Forpus xanthopterygius – Beni savanna – Bolivia (N = 84, key function = hr)

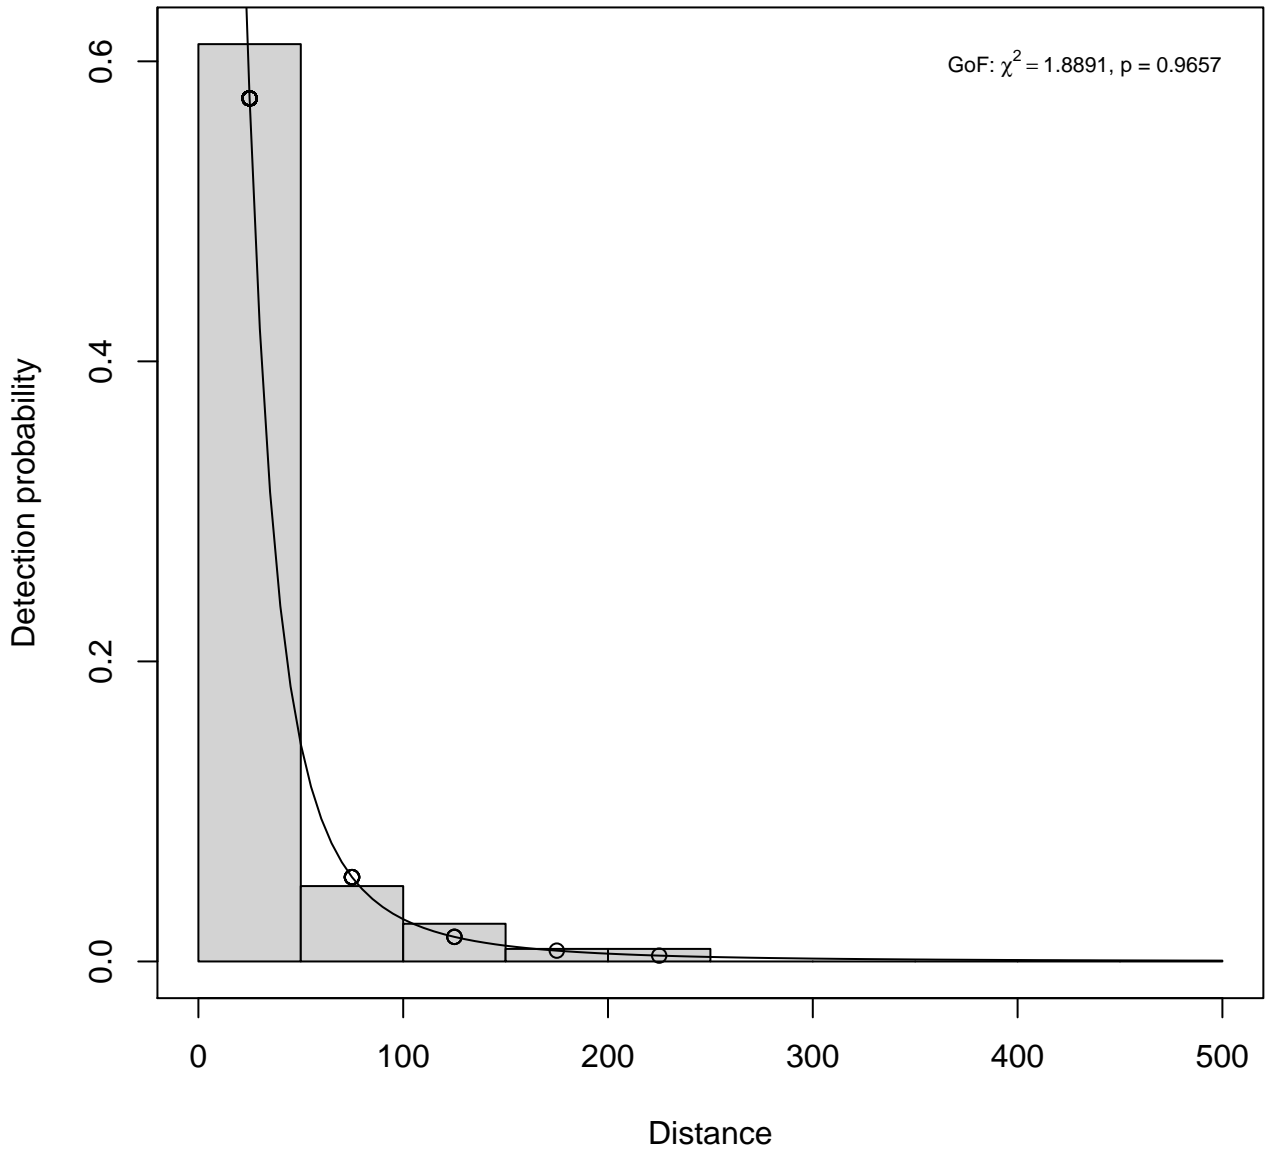

Forpus xanthopterygius – Beni savanna – Bolivia (N = 84, key function = hr)

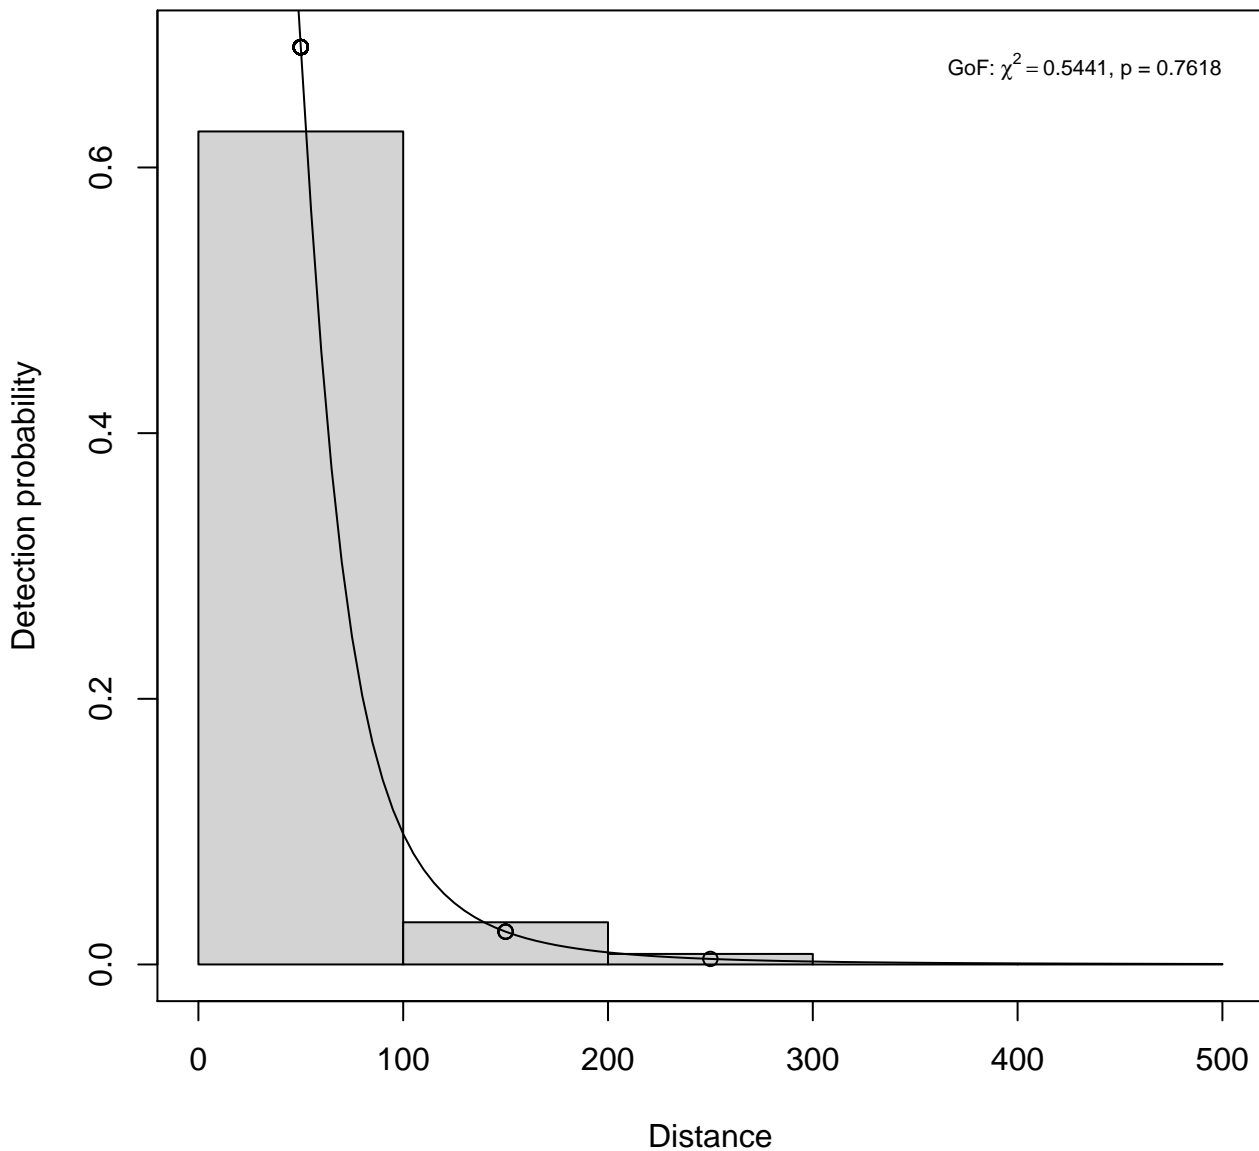

Supplement: s1 [file s1]
