# Supplementary material
Source: MDPI journal article supplement (https://www.mdpi.com/1424-2818/13/7/300)

# **Myiopsitta monachus – Humid Chaco – Paraguay**

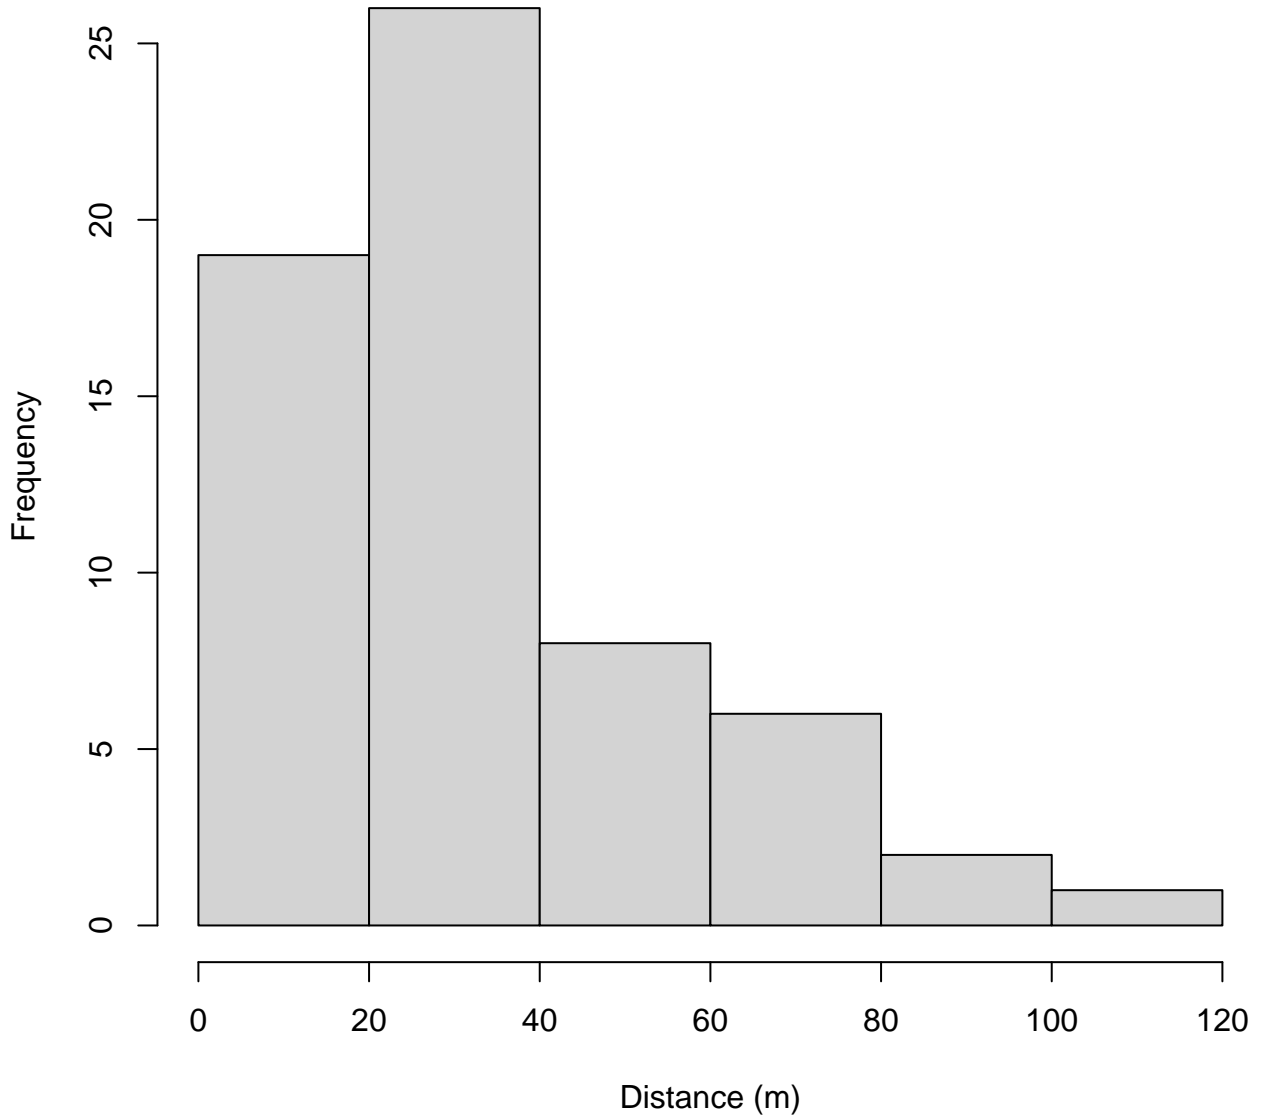

# **Myiopsitta monachus – Humid Chaco – Paraguay**

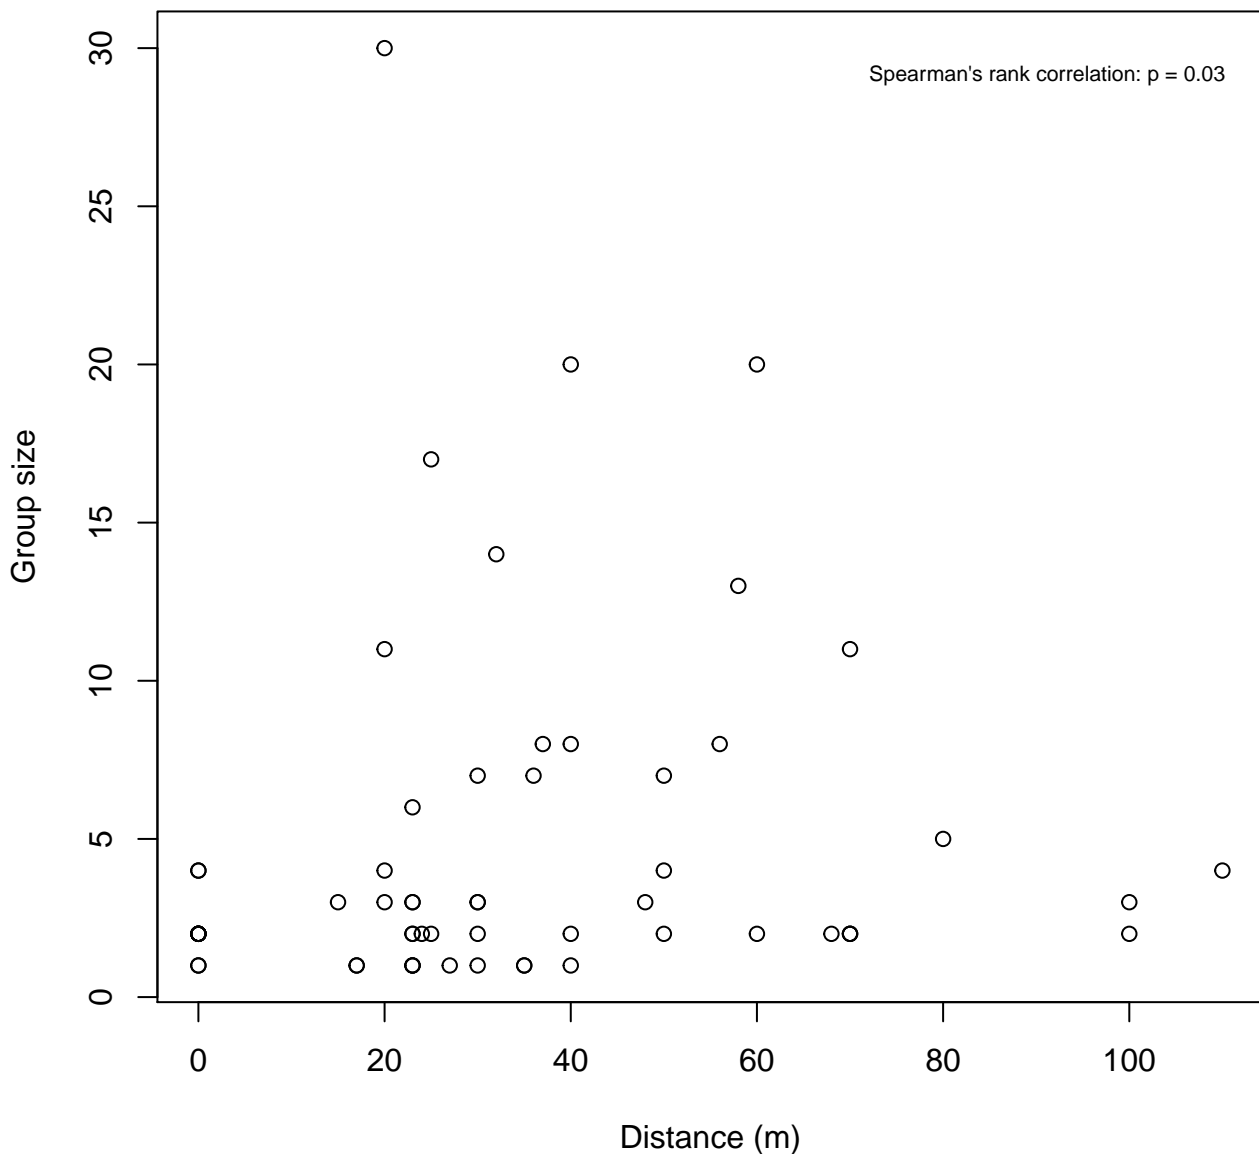

*Myiopsitta monachus* – Humid Chaco – Paraguay (N = 62, key function = hn)

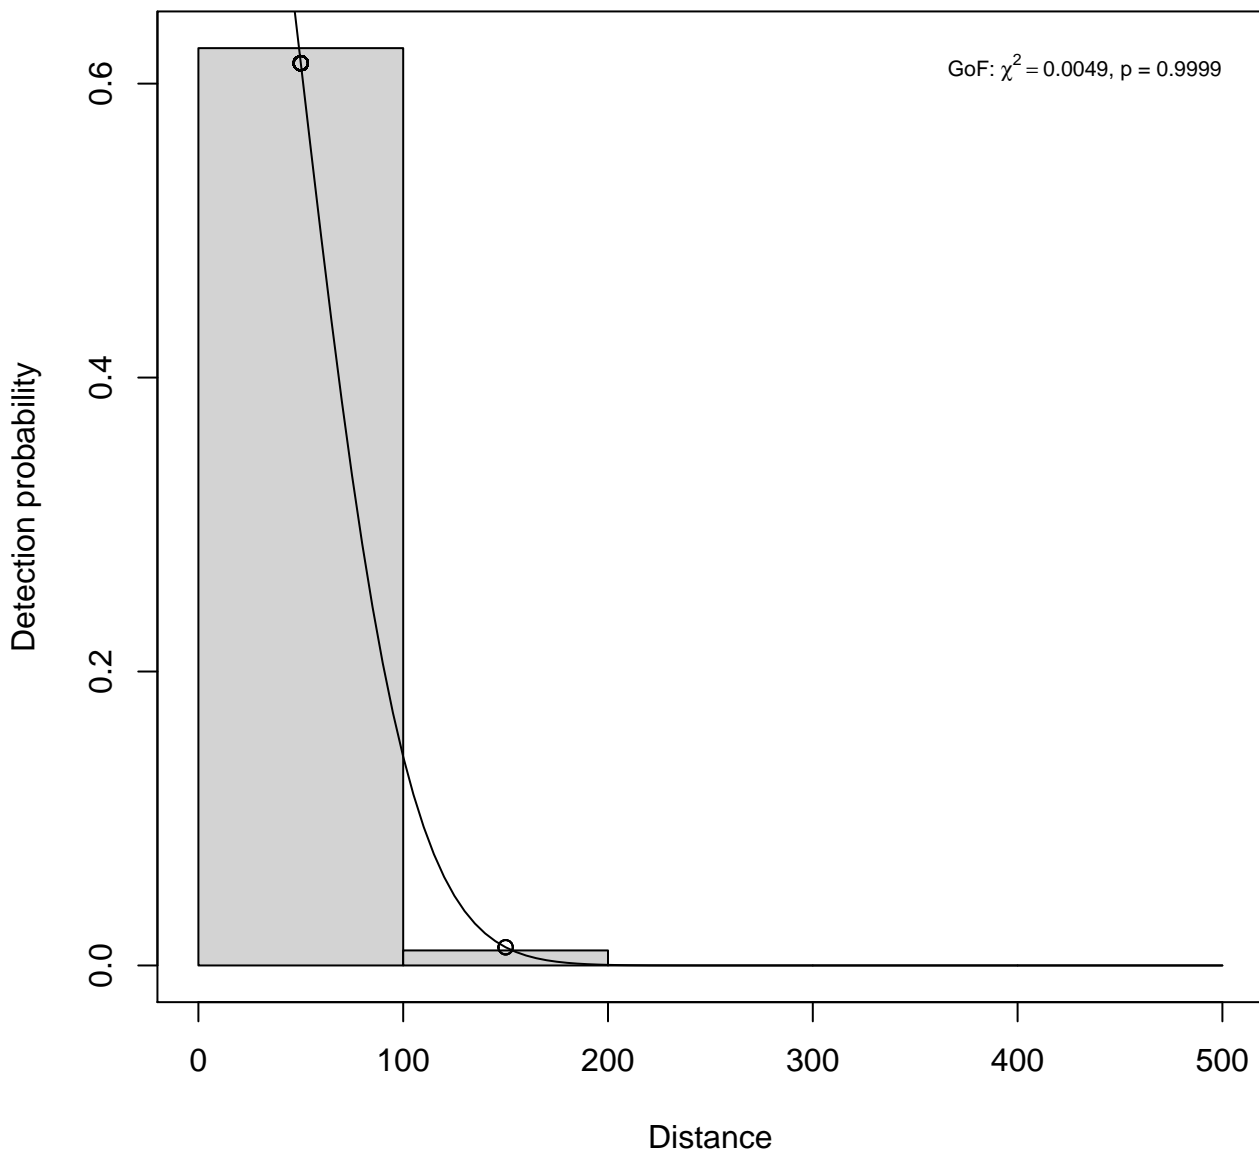

Myiopsitta monachus – Humid Chaco – Paraguay (N = 62, key function = hn)

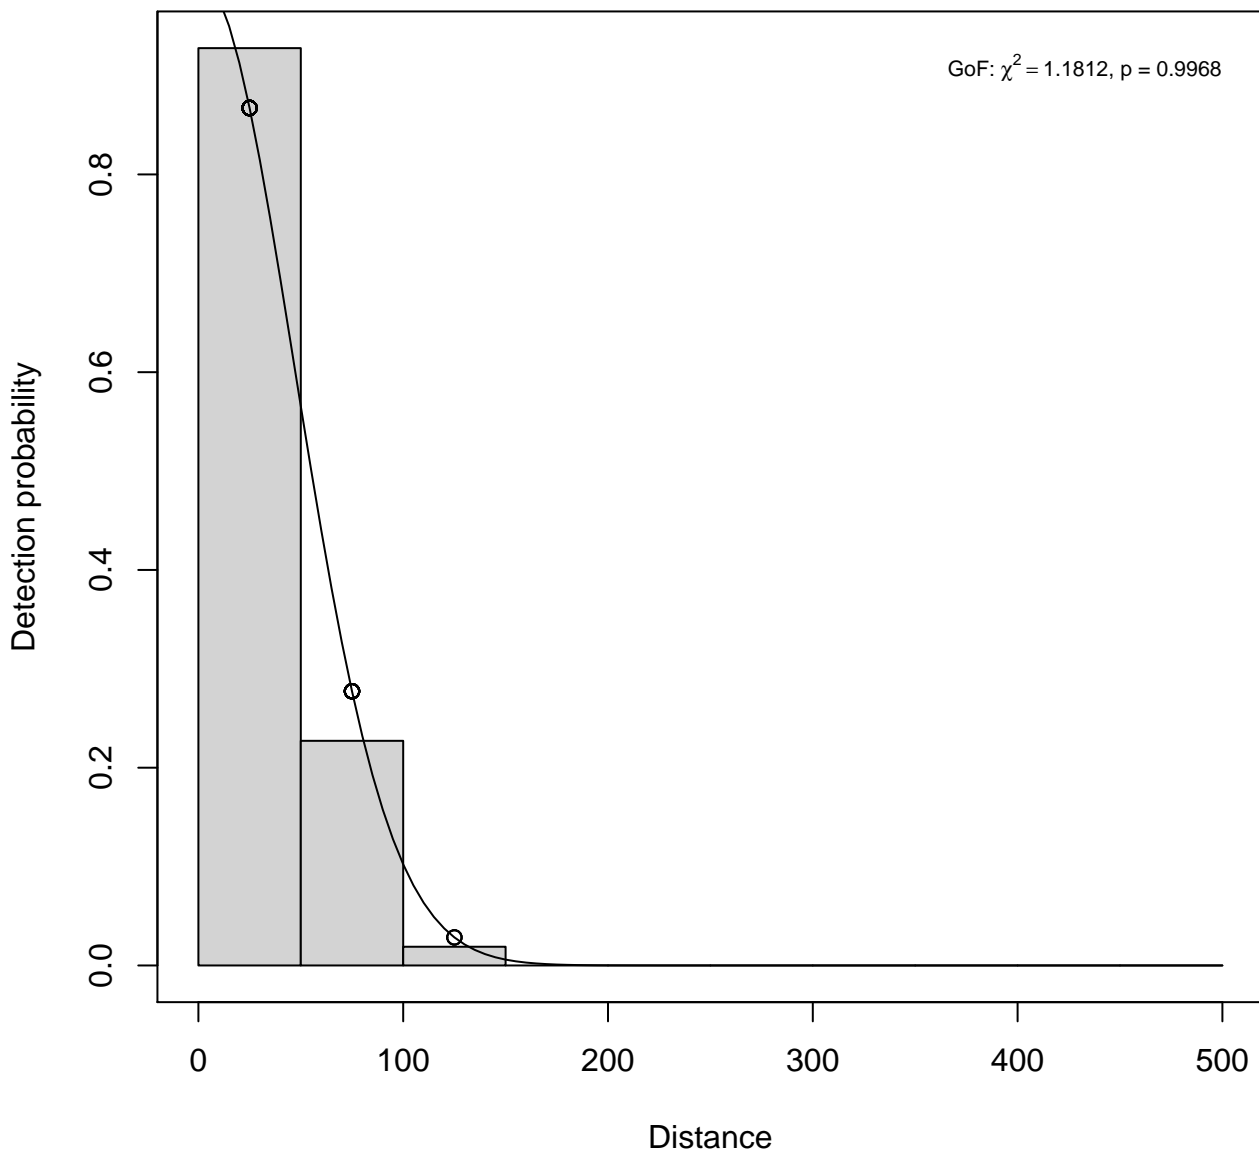

*Myiopsitta monachus* – Humid Chaco – Paraguay (N = 62, key function = hn)

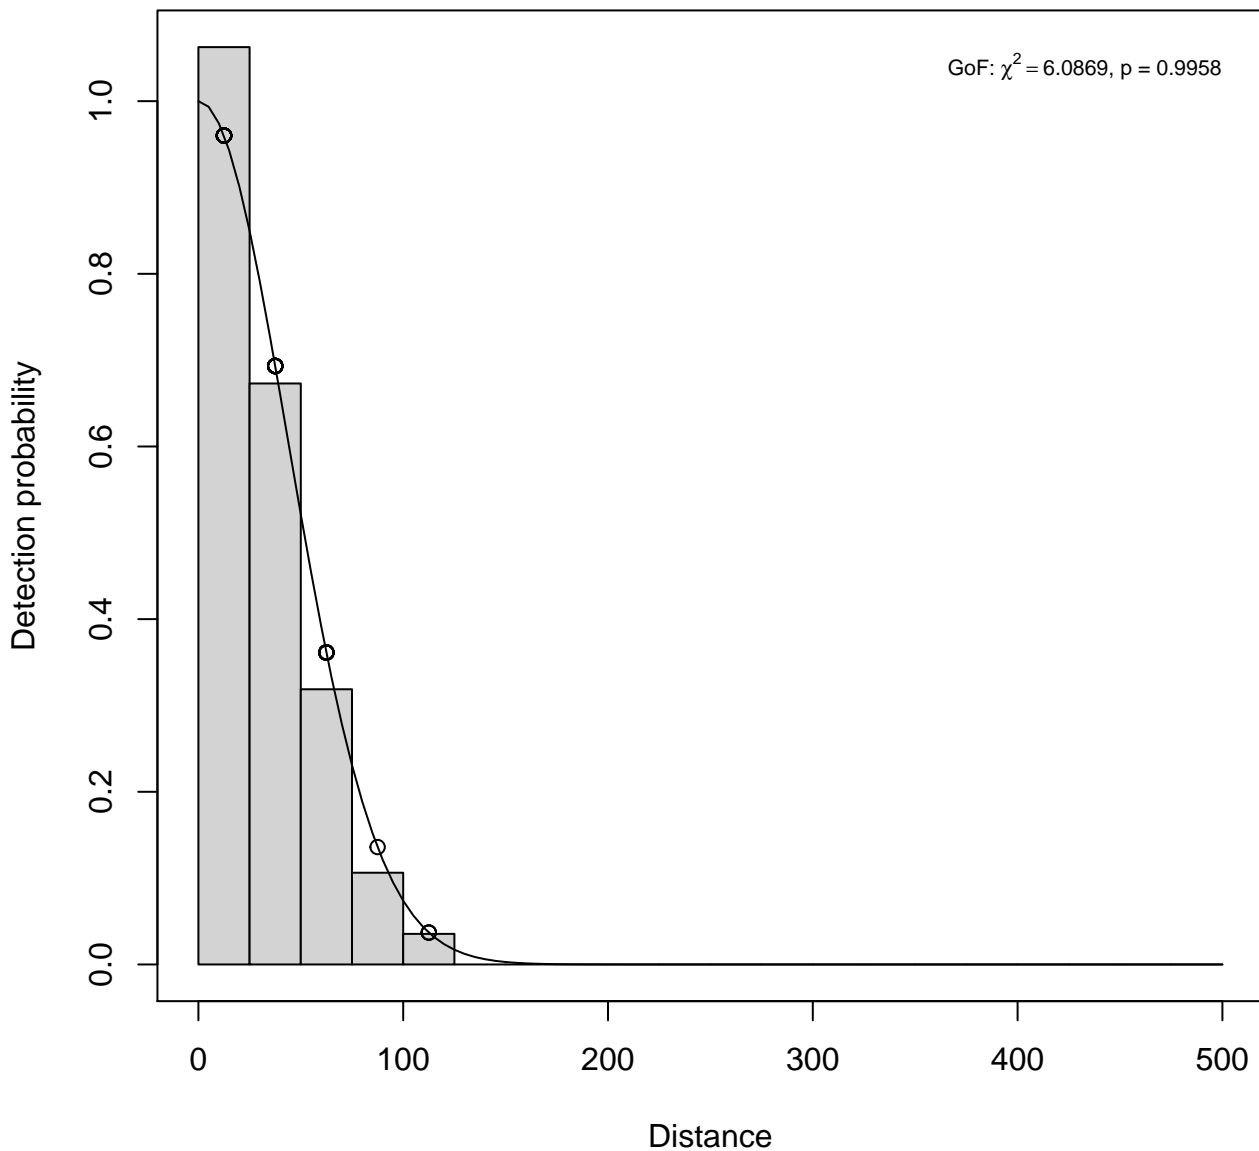

Supplement: s1 [file s1]
