# Supplementary material
Source: MDPI journal article supplement (https://www.mdpi.com/1424-2818/13/7/300)

# **Myiopsitta monachus – Uruguayan savanna – Uruguay**

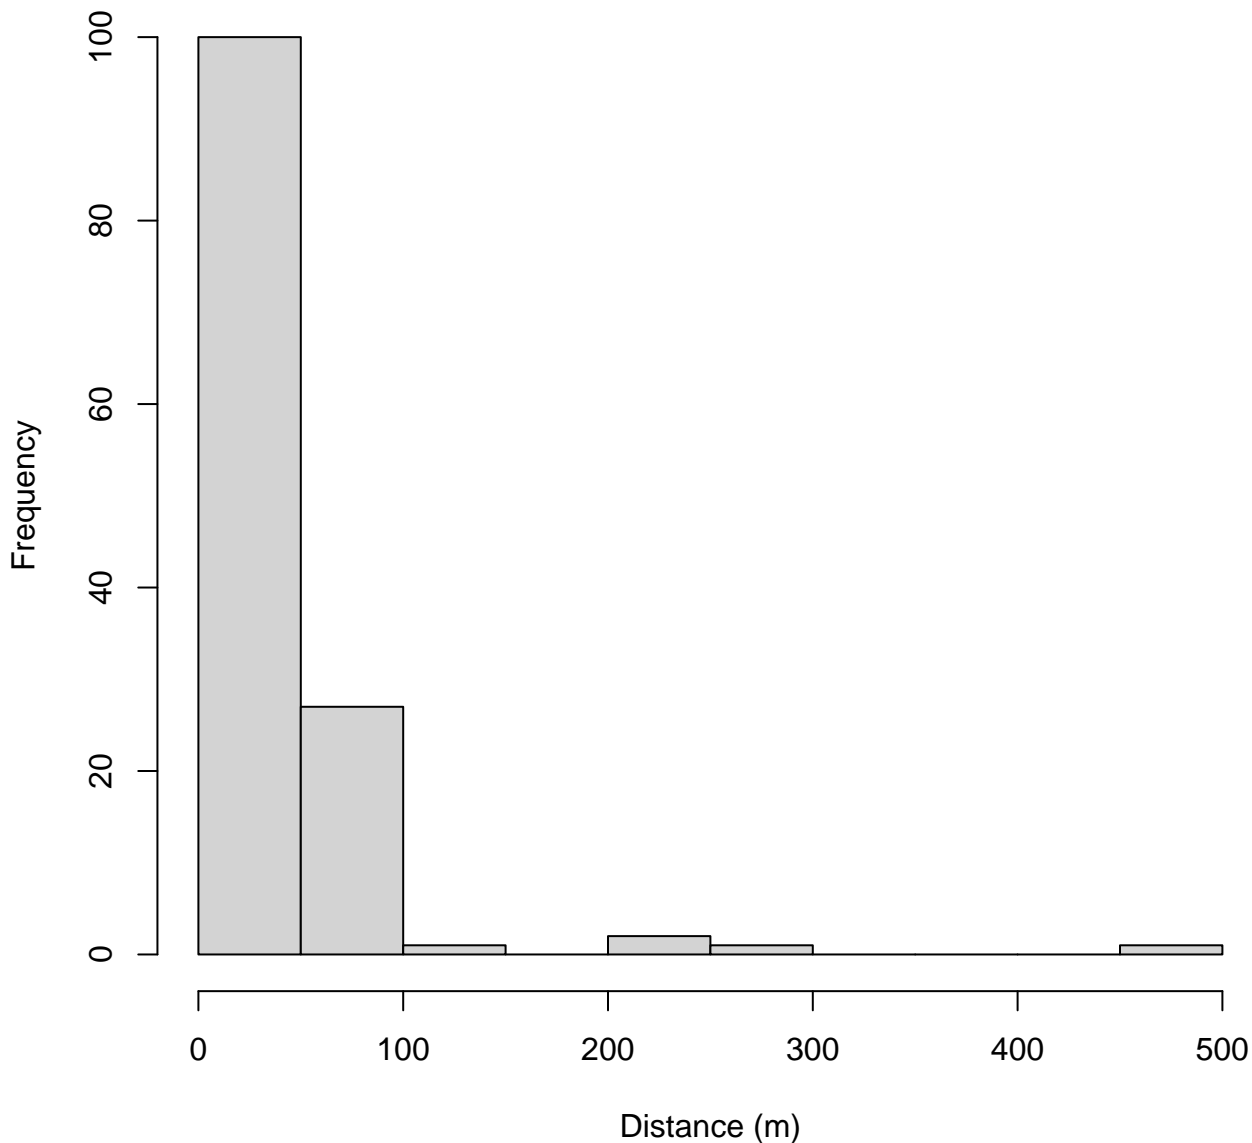

# Myiopsitta monachus – Uruguayan savanna – Uruguay

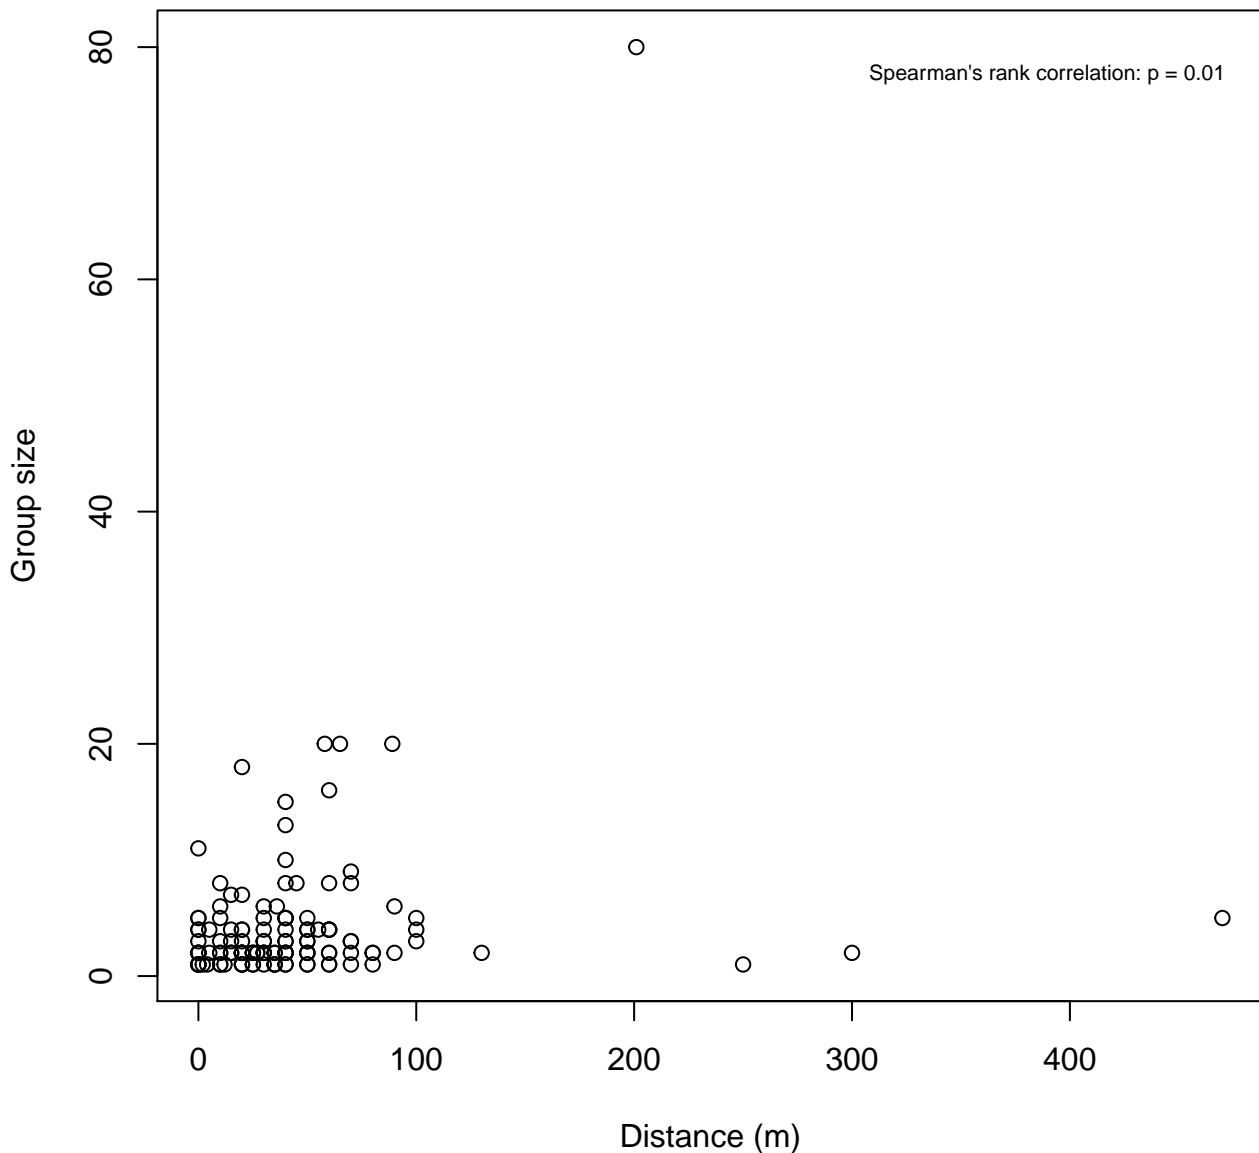

Myiopsitta monachus – Uruguayan savanna – Uruguay (N = 132, key function = hr)

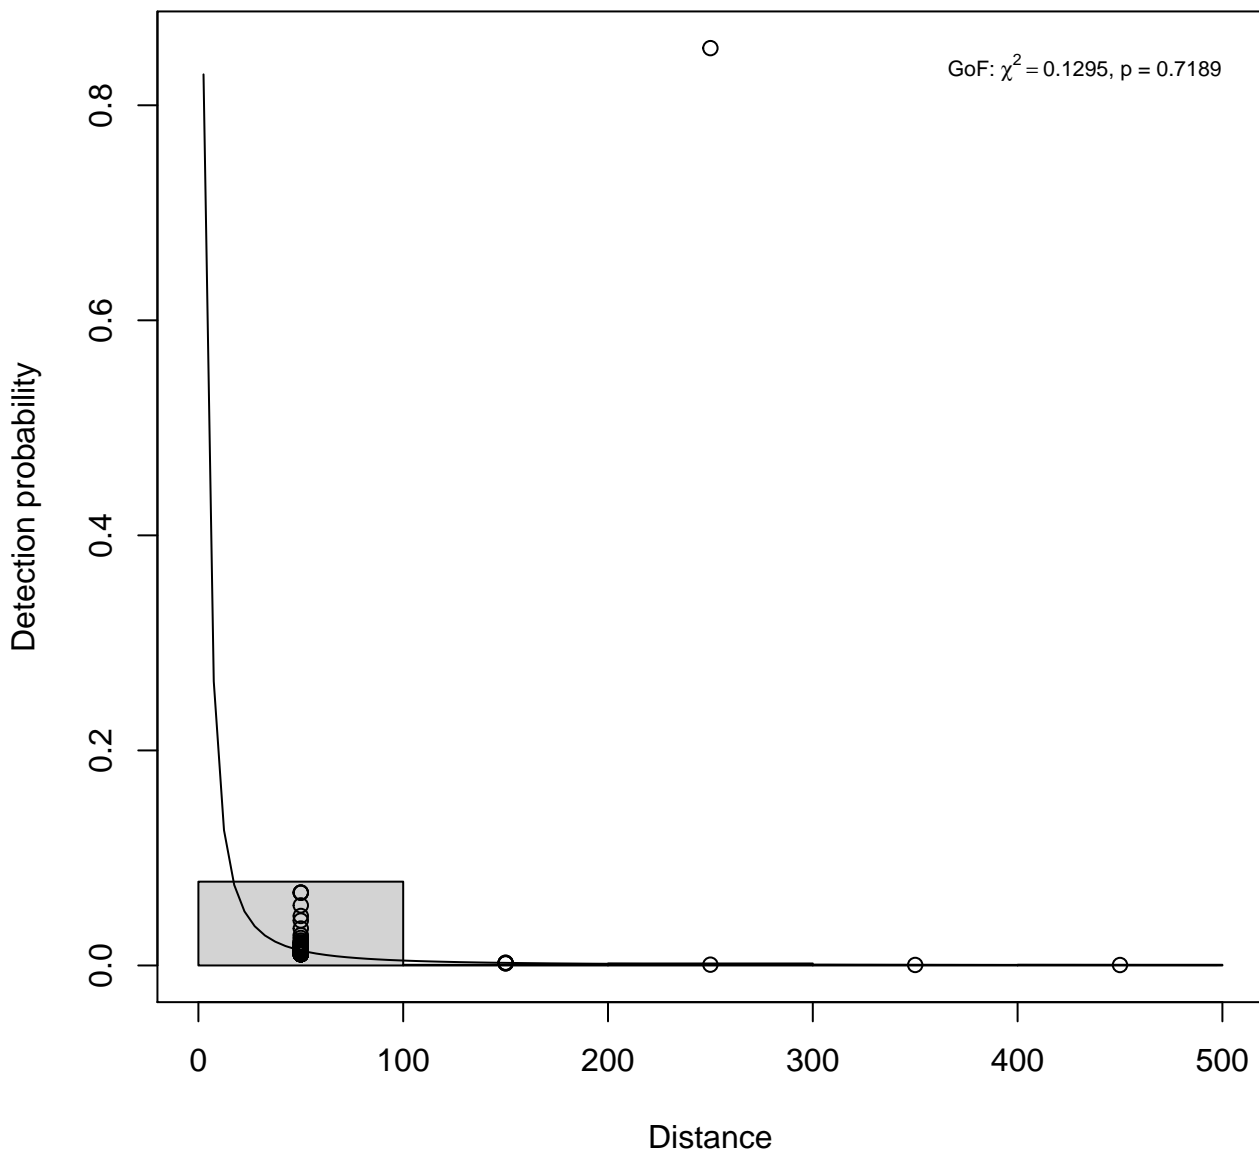

Myiopsitta monachus – Uruguayan savanna – Uruguay (N = 132, key function = hr)

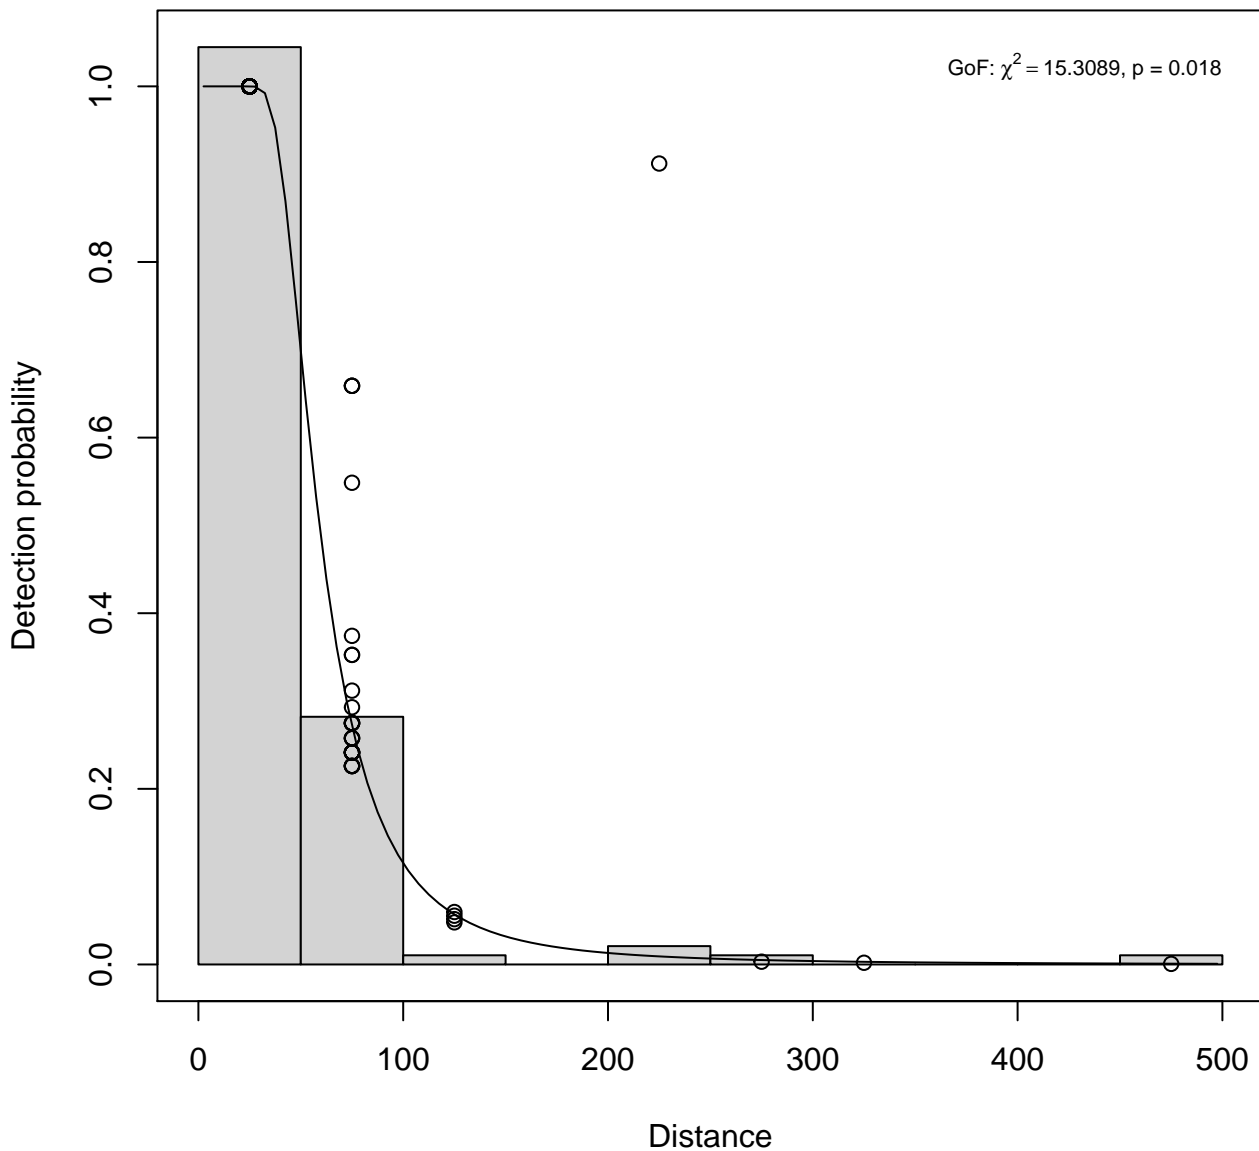

Myiopsitta monachus – Uruguayan savanna – Uruguay (N = 132, key function = hr)

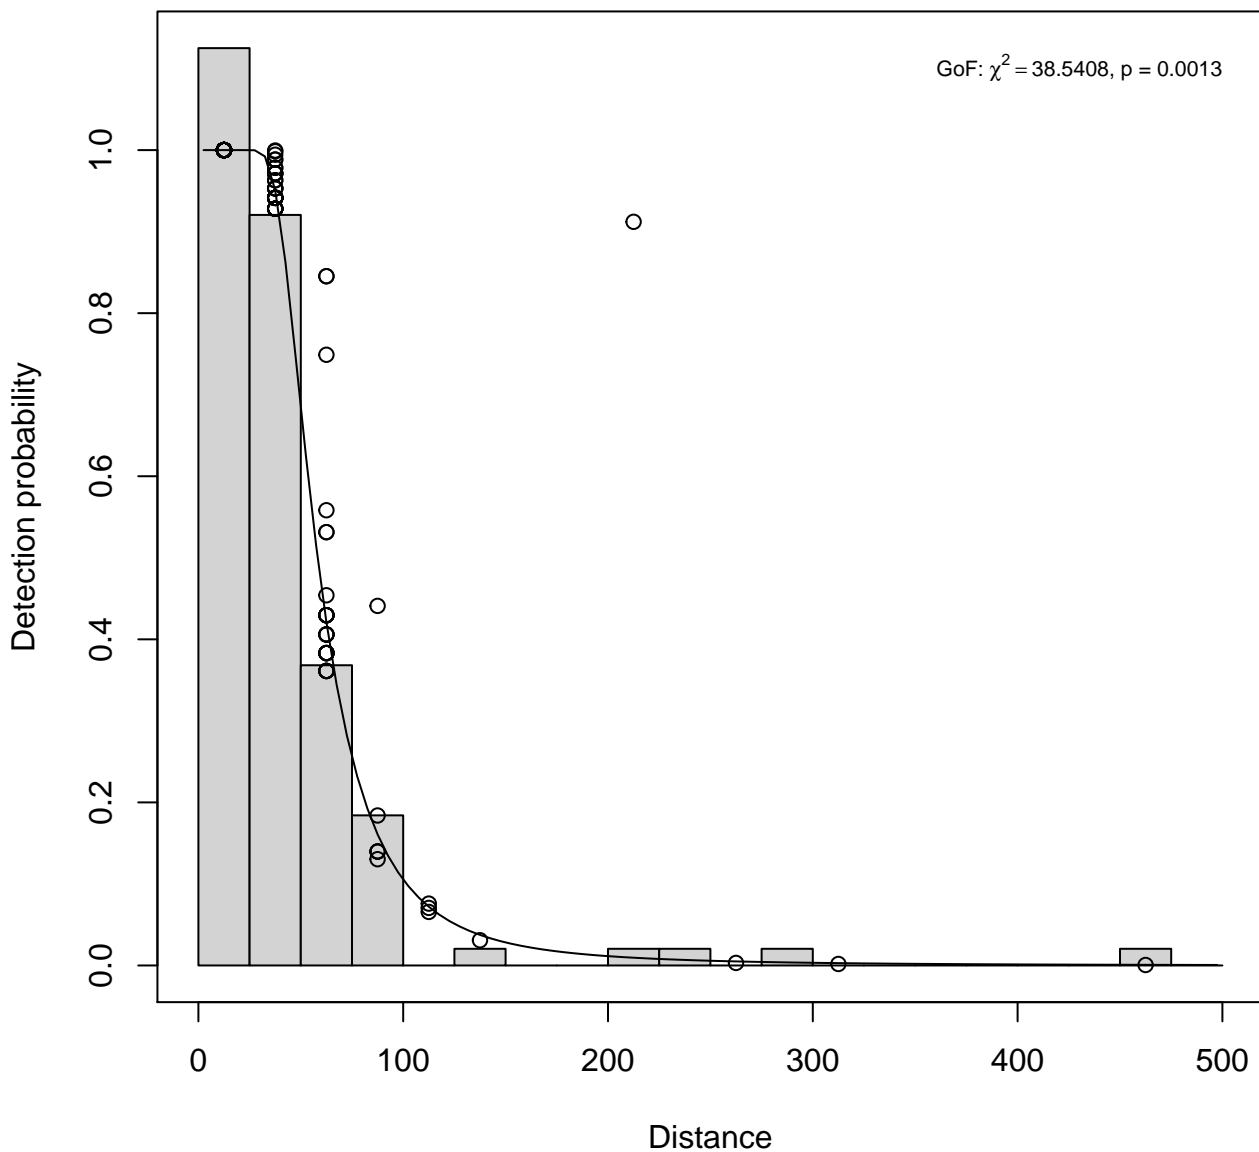

Supplement: s1 [file s1]
