# Supplementary material
Source: MDPI journal article supplement (https://www.mdpi.com/1424-2818/13/7/300)

# **Thectocercus acuticaudatus – Caatinga – Brazil**

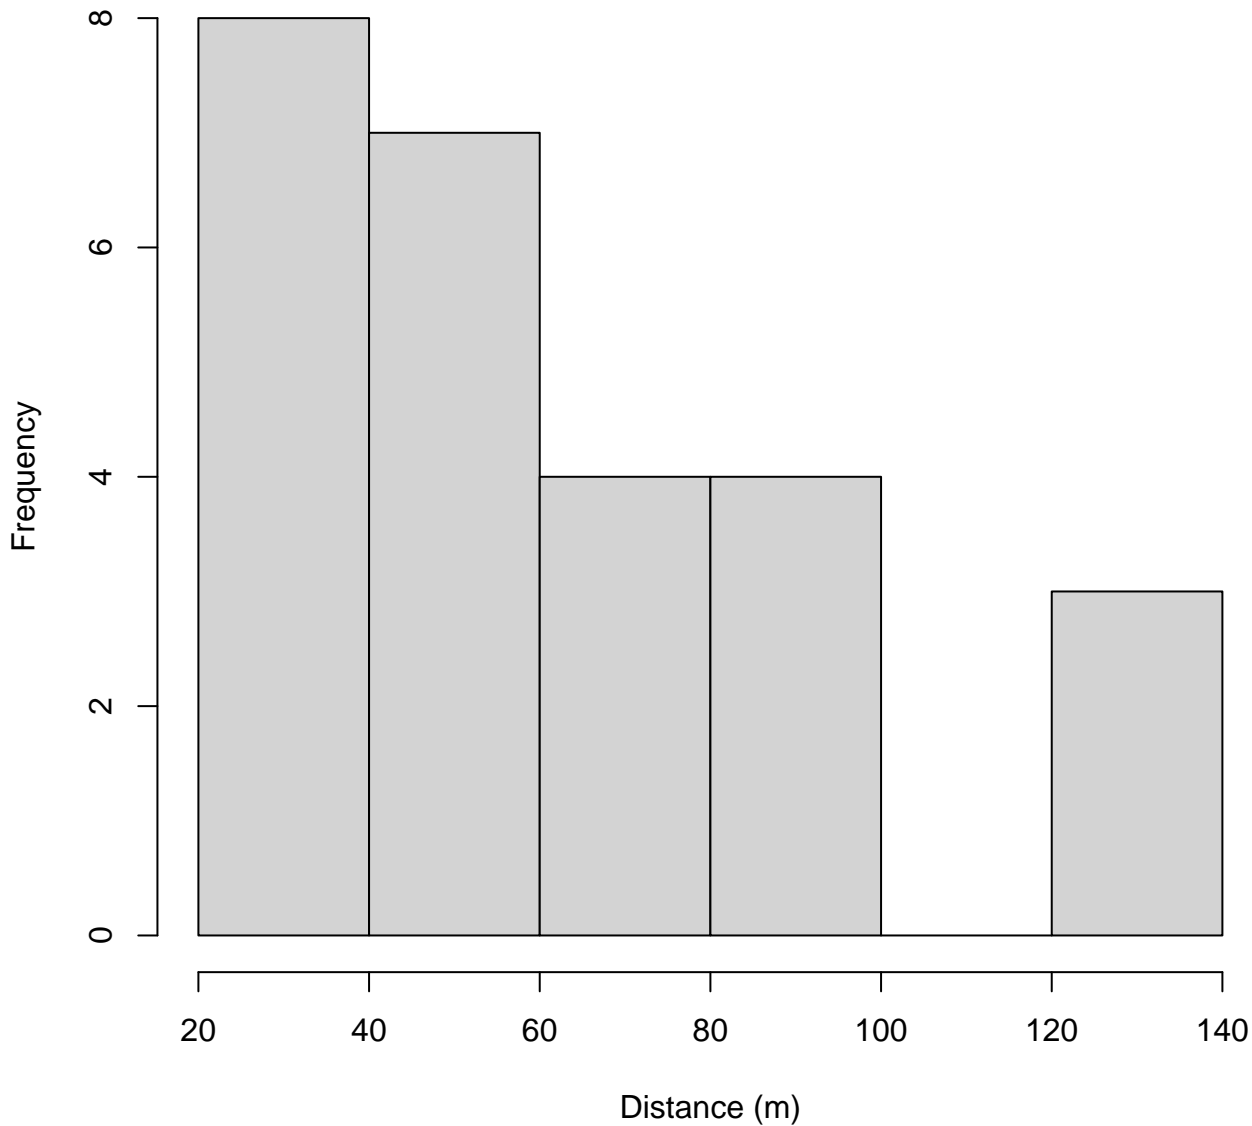

# **Thectocercus acuticaudatus – Caatinga – Brazil**

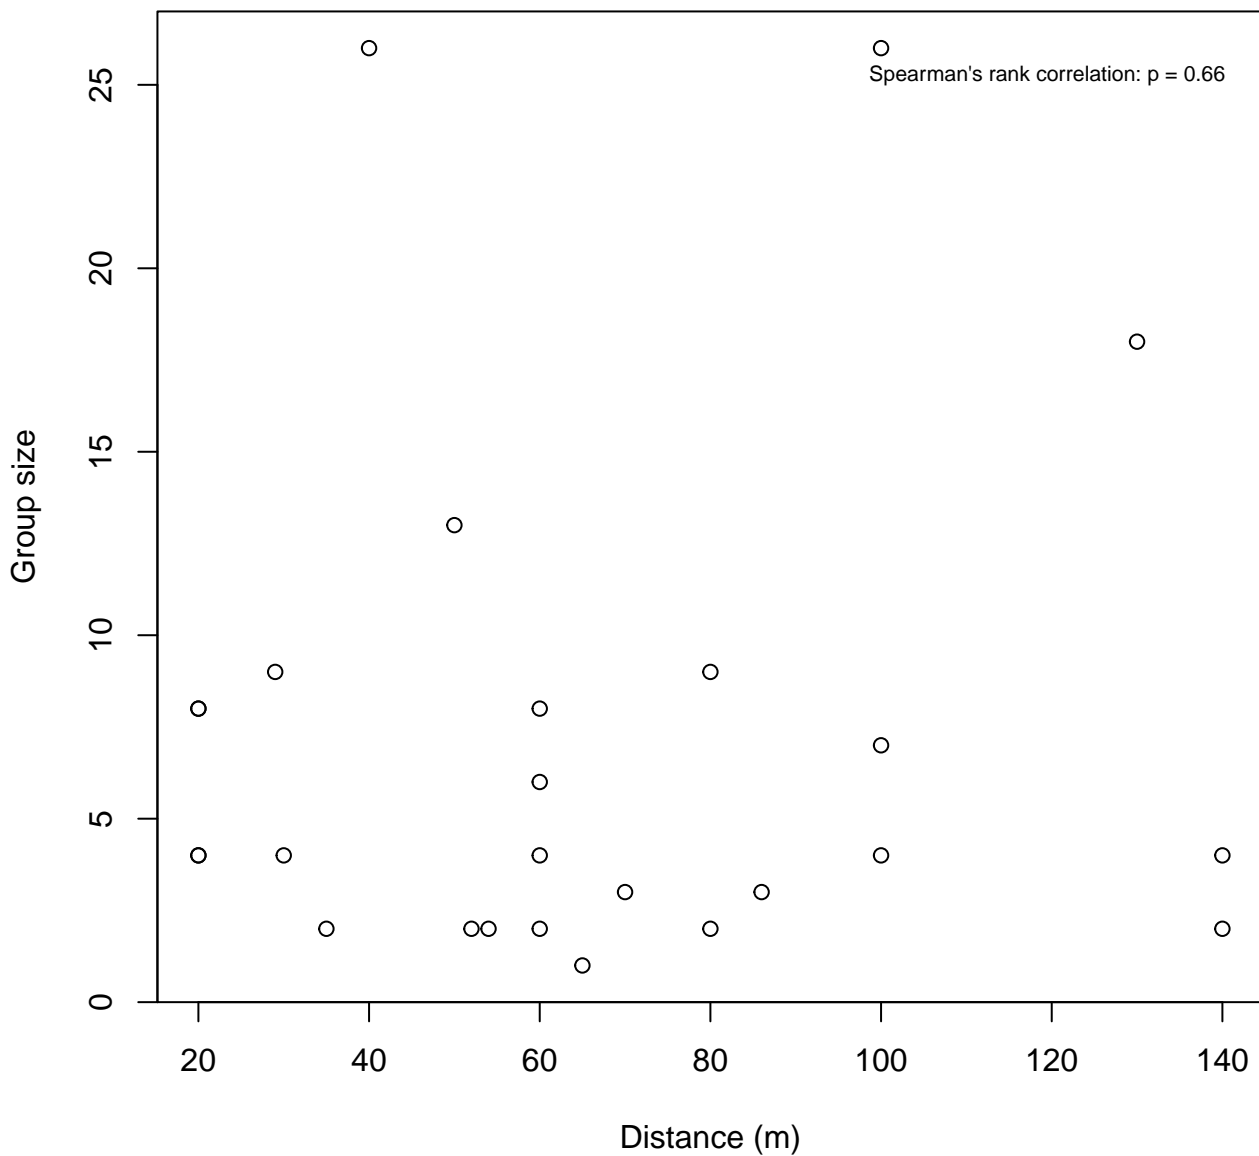

Thectocercus acuticaudatus – Caatinga – Brazil (N = 26, key function = hr)

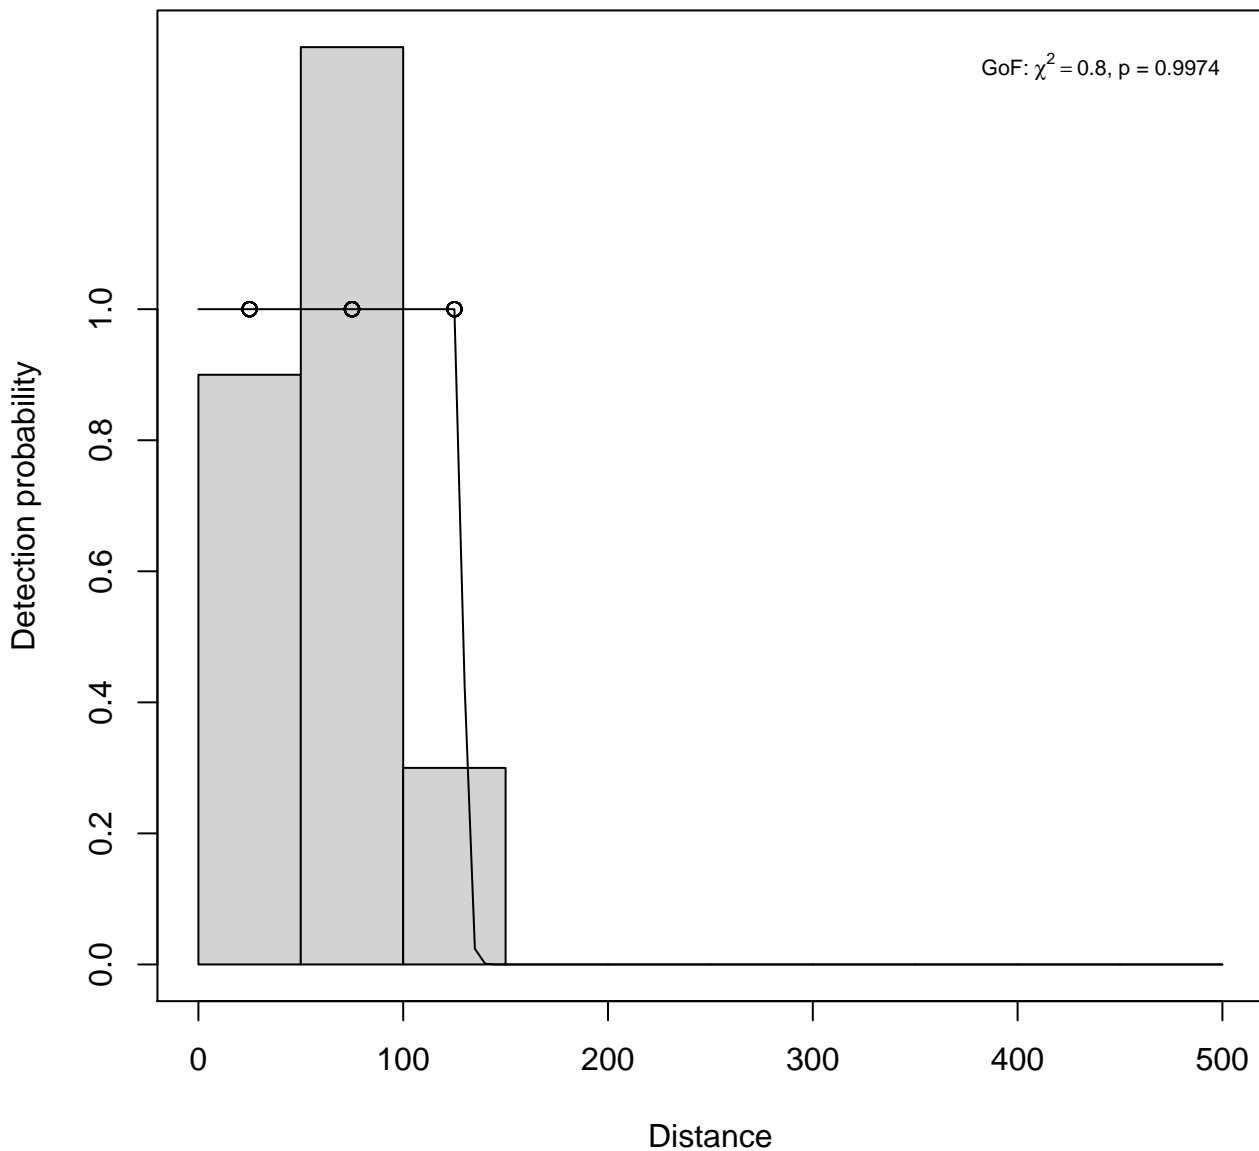

*Thectocercus acuticaudatus* – Caatinga – Brazil (N = 26, key function = hr)

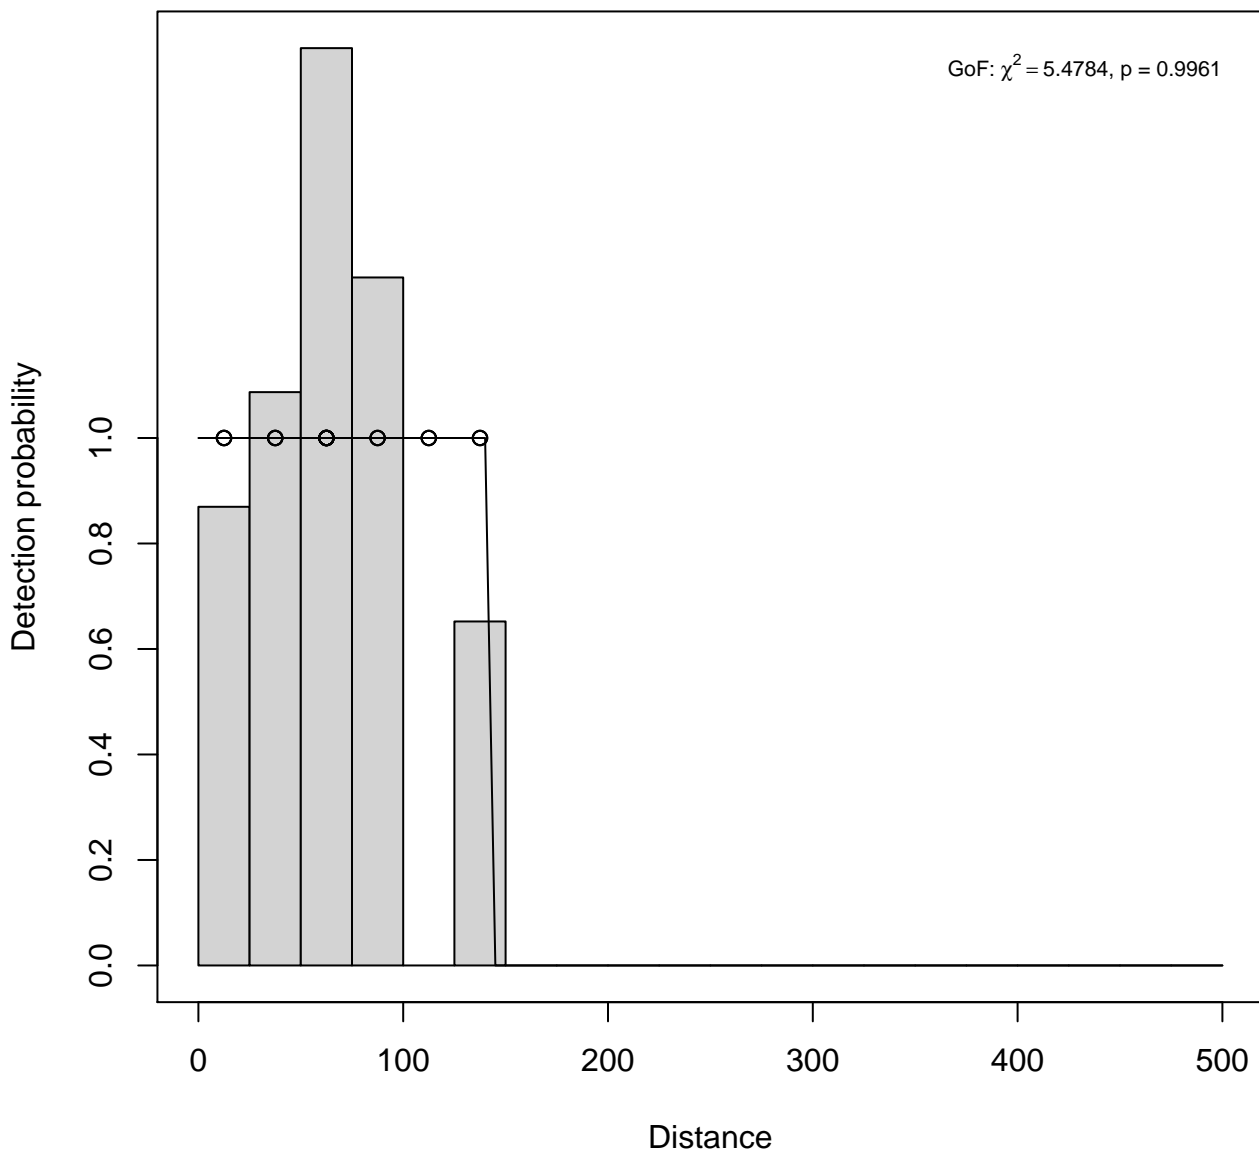

*Thectocercus acuticaudatus* – Caatinga – Brazil (N = 26, key function = hn)

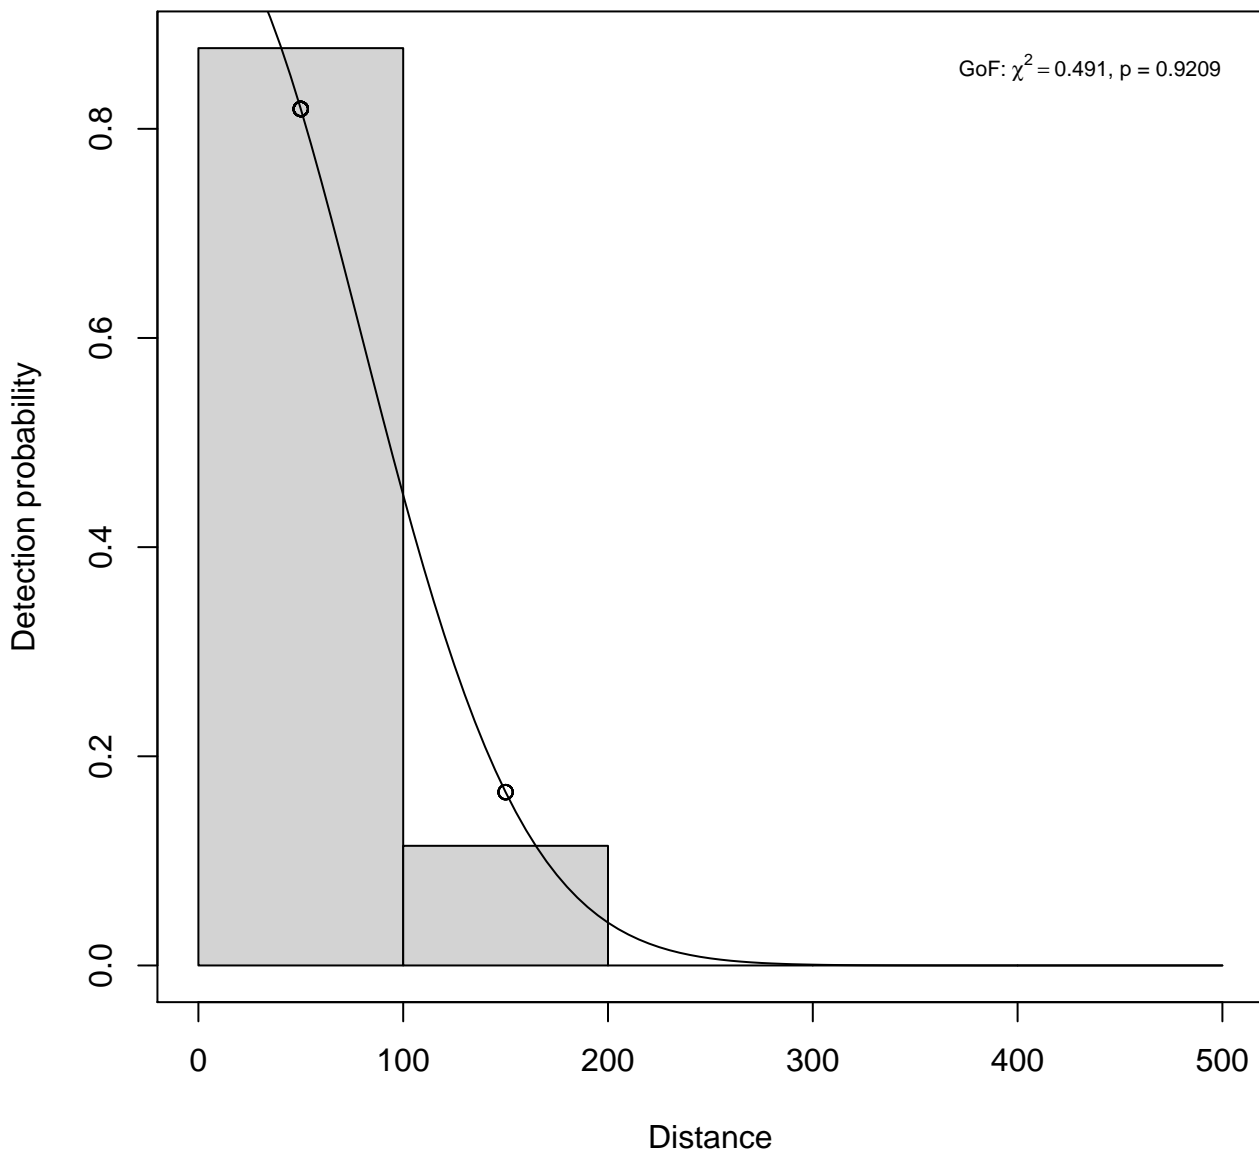

Supplement: s1 [file s1]
