# Supplementary material
Source: MDPI journal article supplement (https://www.mdpi.com/1424-2818/13/7/300)

# **Ara severus – Xingu–Tocantins–Araguaia moist forests – Brazil**

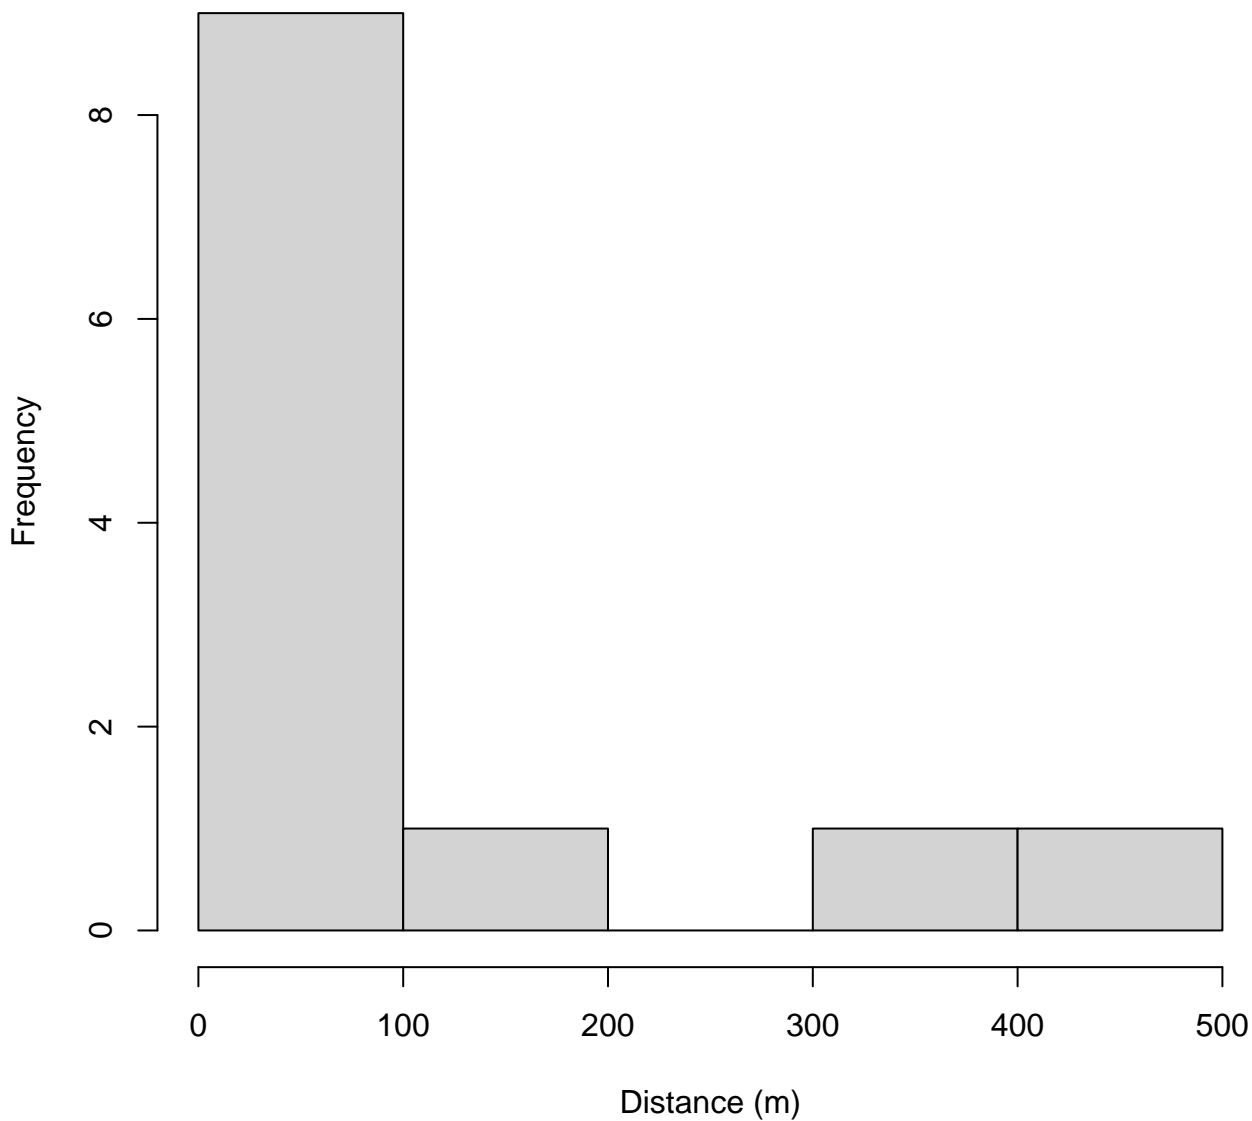

# Ara severus – Xingu–Tocantins–Araguaia moist forests – Brazil

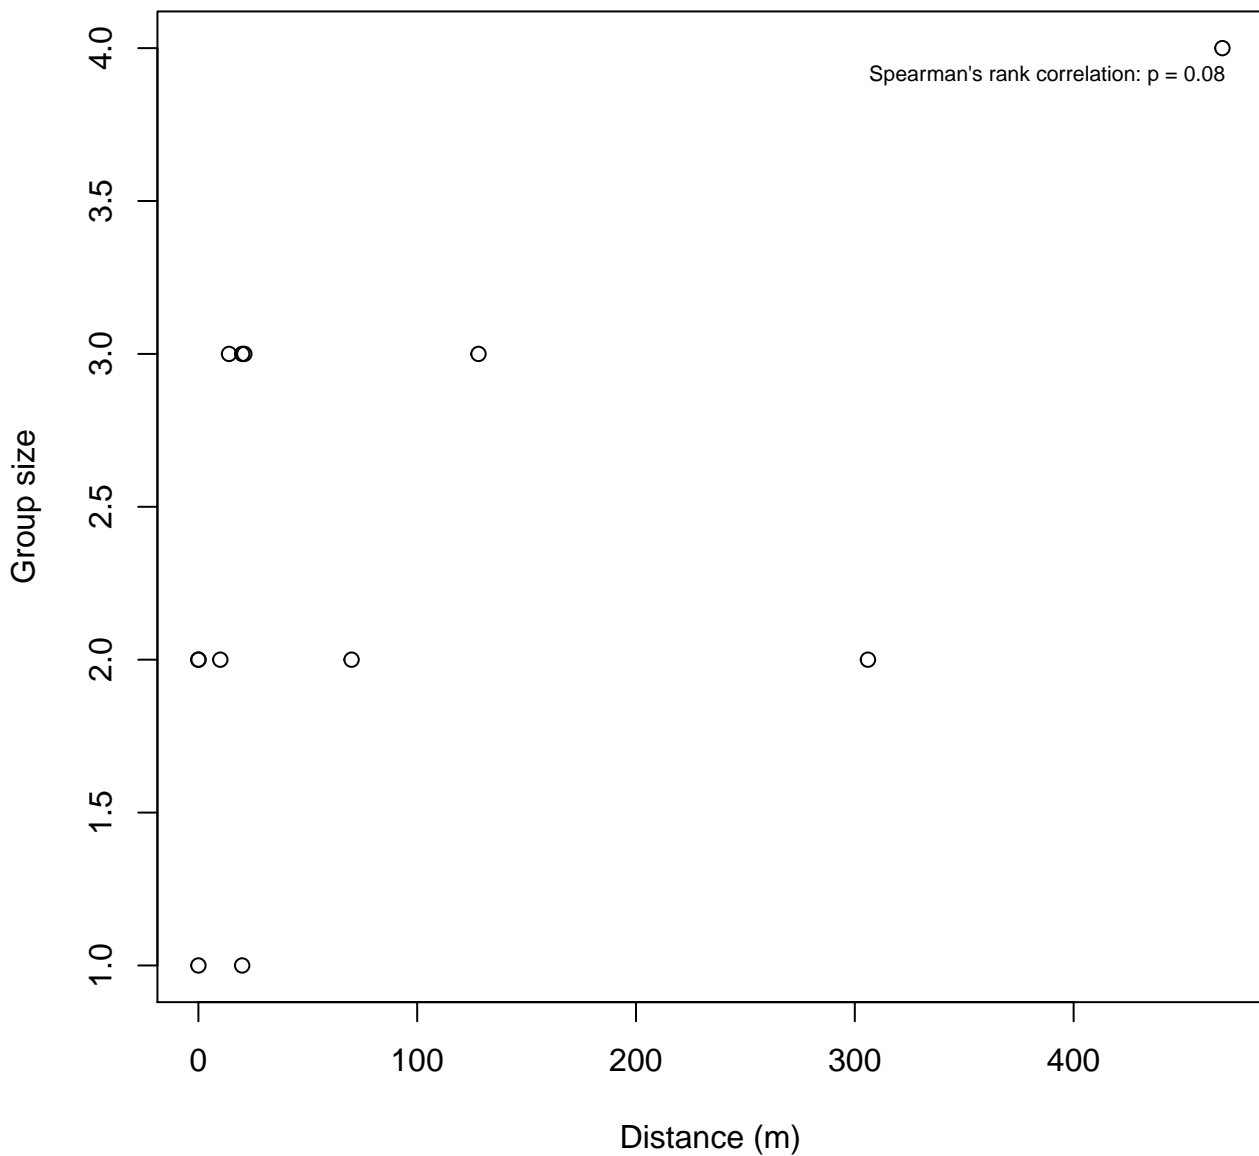

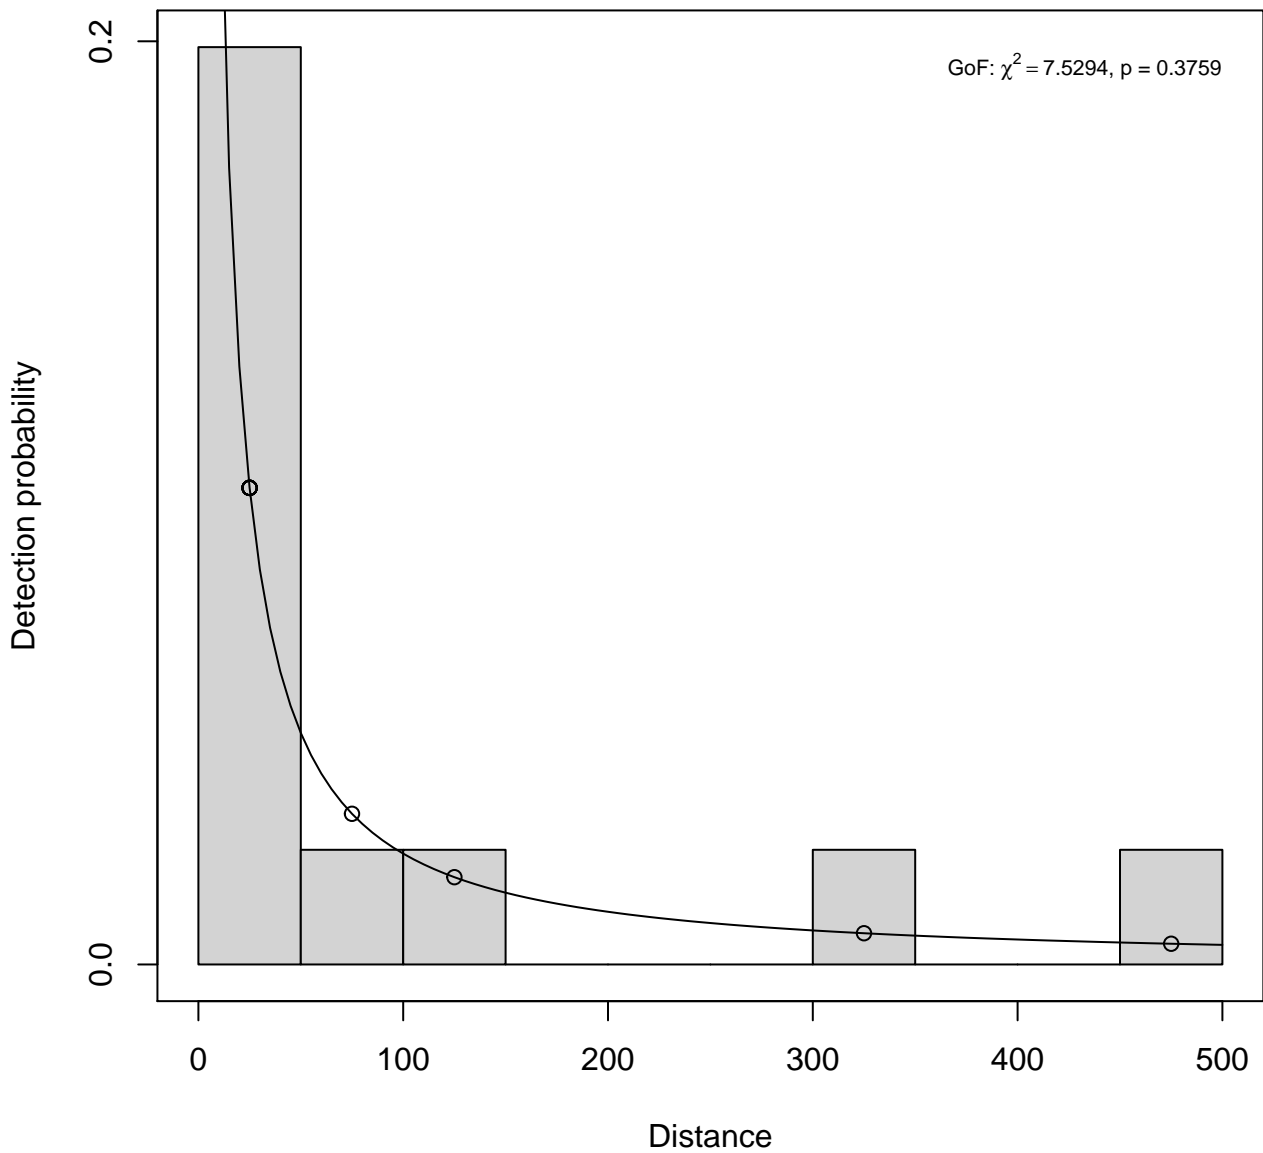

*Ara severus* – Xingu–Tocantins–Araguaia moist forests – Brazil (N = 12, key function = hr)

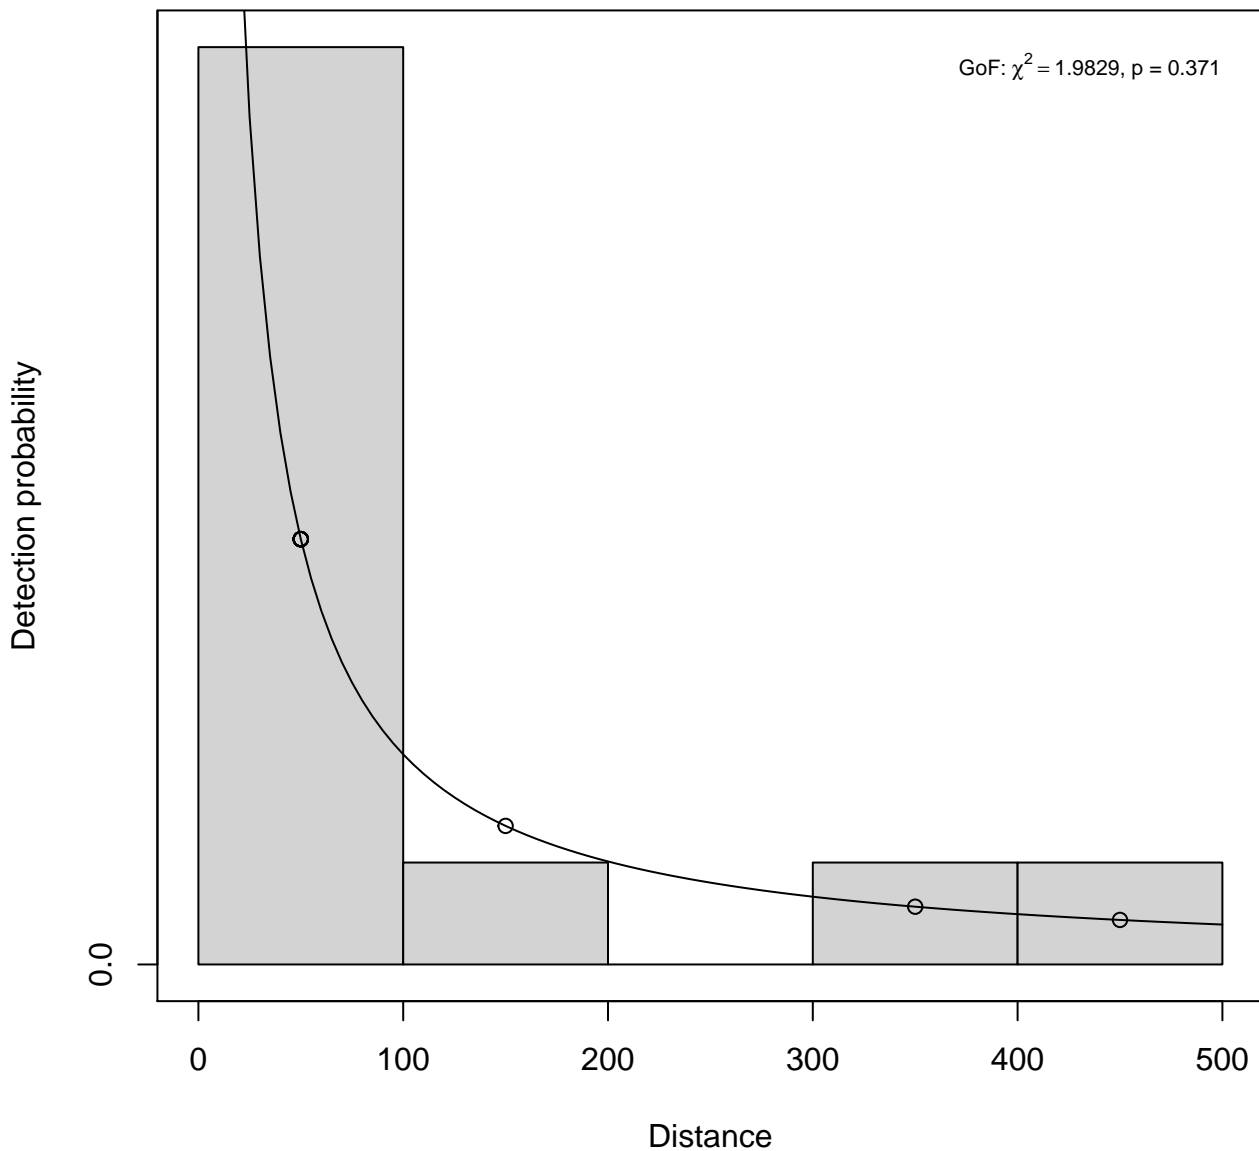

*Ara severus* – Xingu–Tocantins–Araguaia moist forests – Brazil (N = 12, key function = hr)

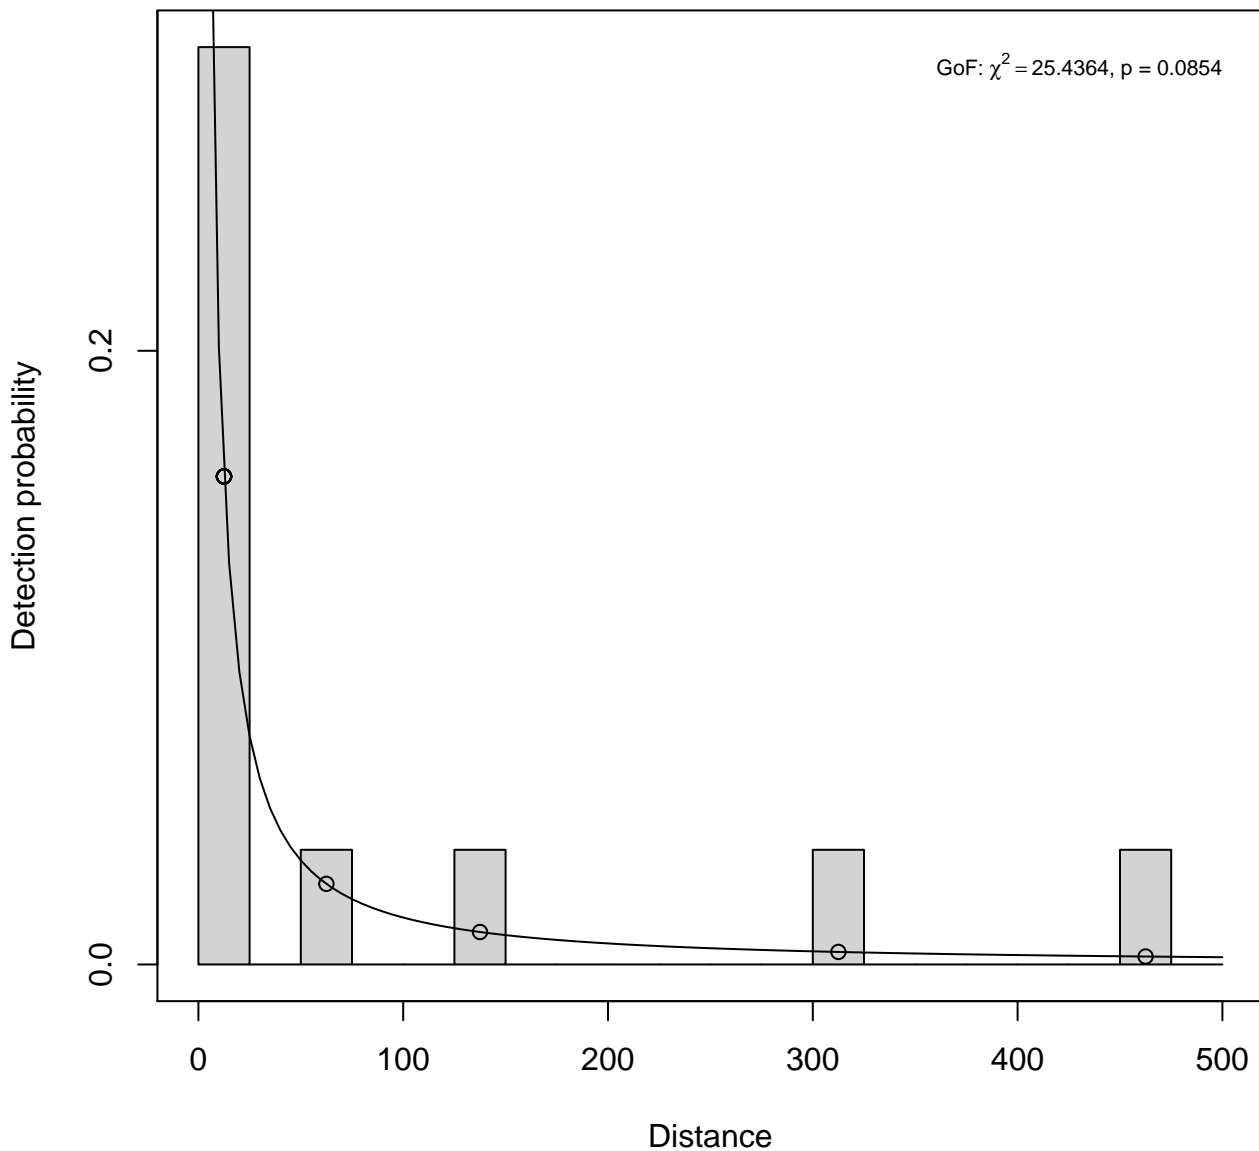

Supplement: s1 [file s1]
