# Supplementary material
Source: MDPI journal article supplement (https://www.mdpi.com/1424-2818/13/7/300)

# ***Alpiopsitta xanthops* – Beni savanna – Bolivia**

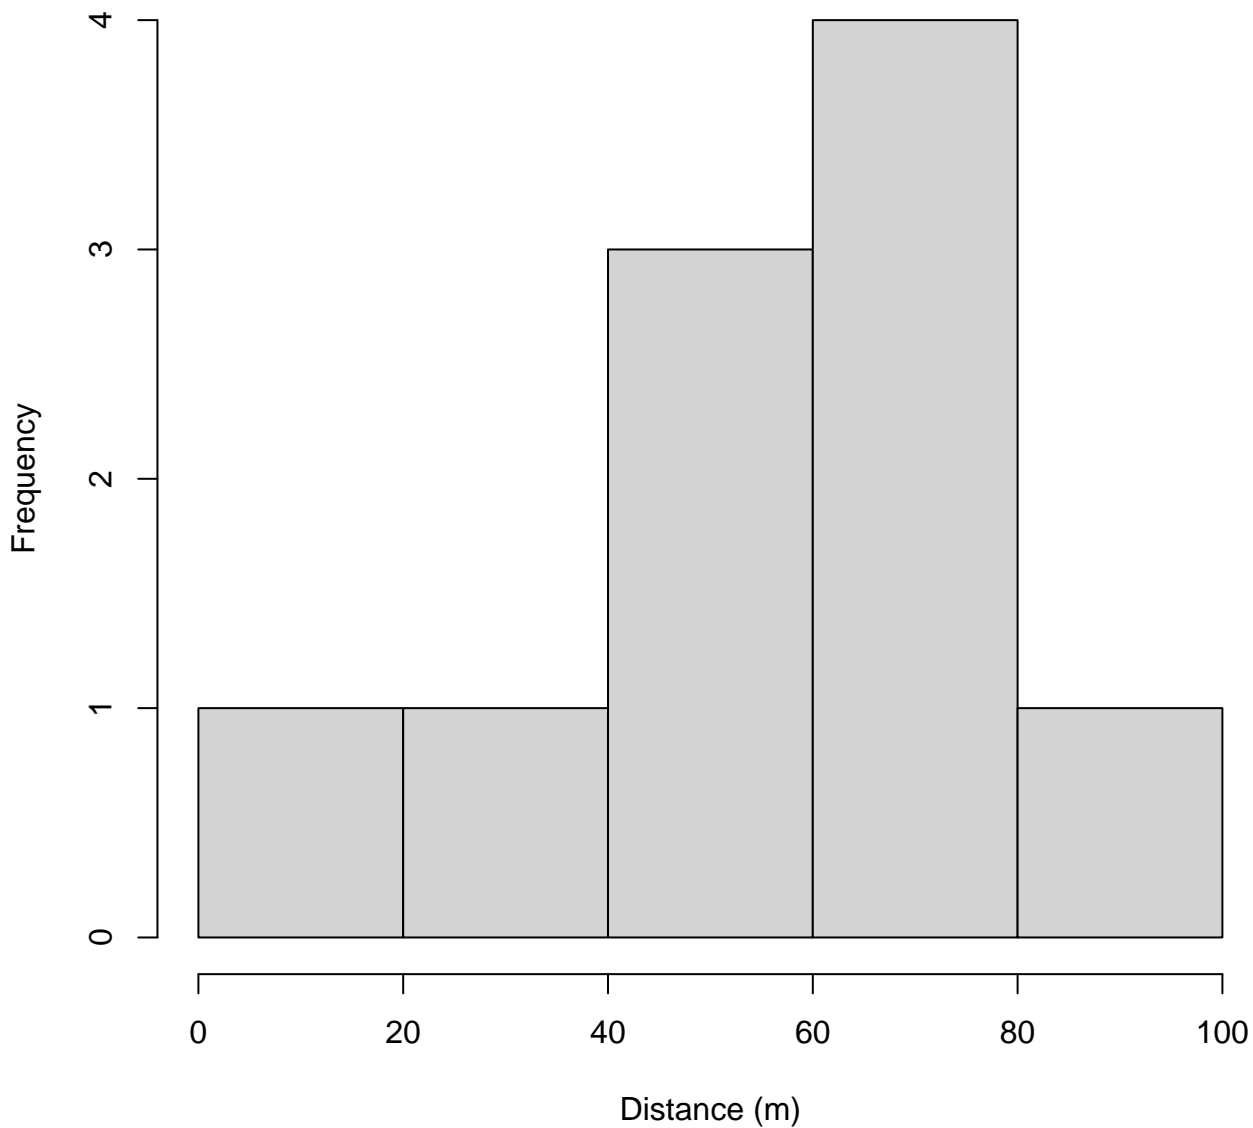

# Alipiopsitta xanthops – Beni savanna – Bolivia

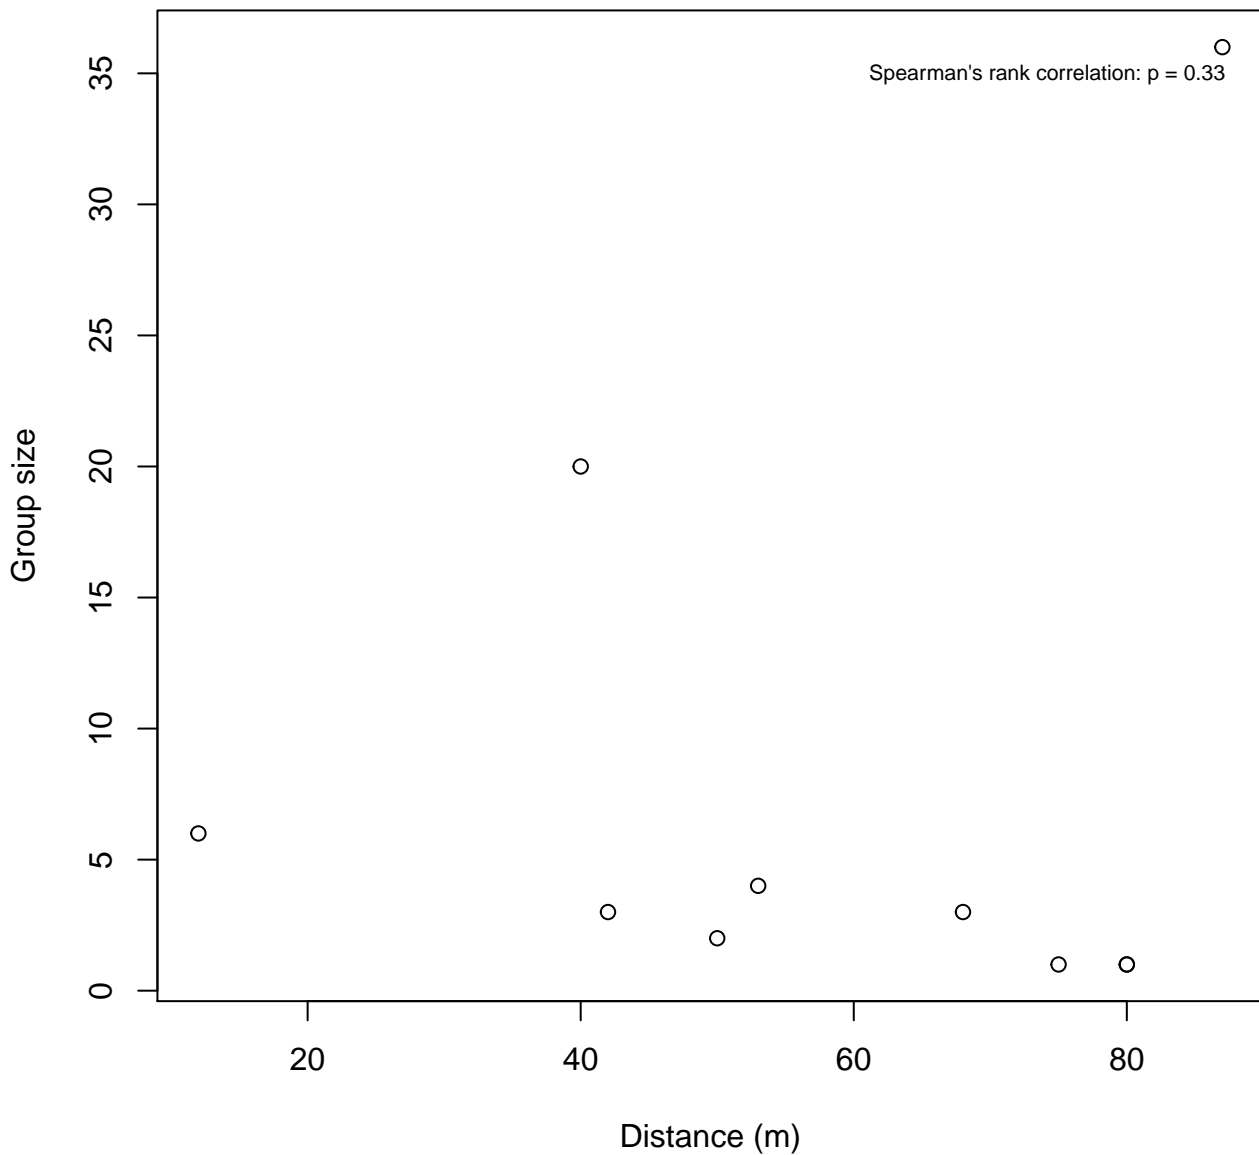

Alipiopsitta xanthops – Beni savanna – Bolivia (N = 10, key function = hn)

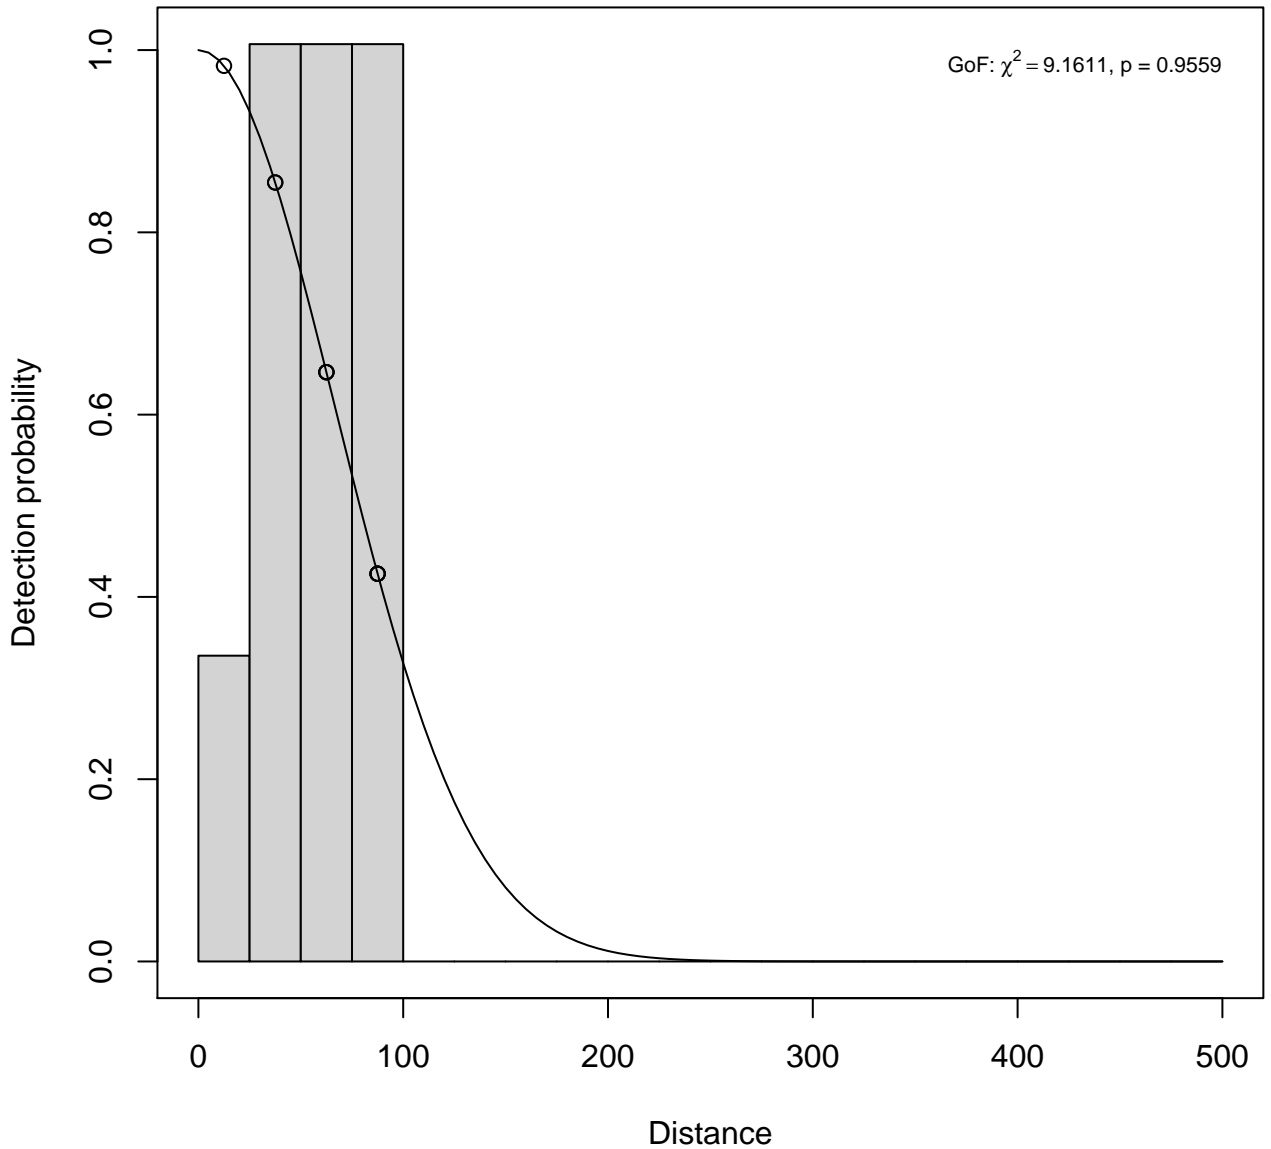

GoF:  $\chi^2 = \text{NA}$ , p = NA

Alipiopsitta xanthops – Beni savanna – Bolivia (N = 10, key function = hn)

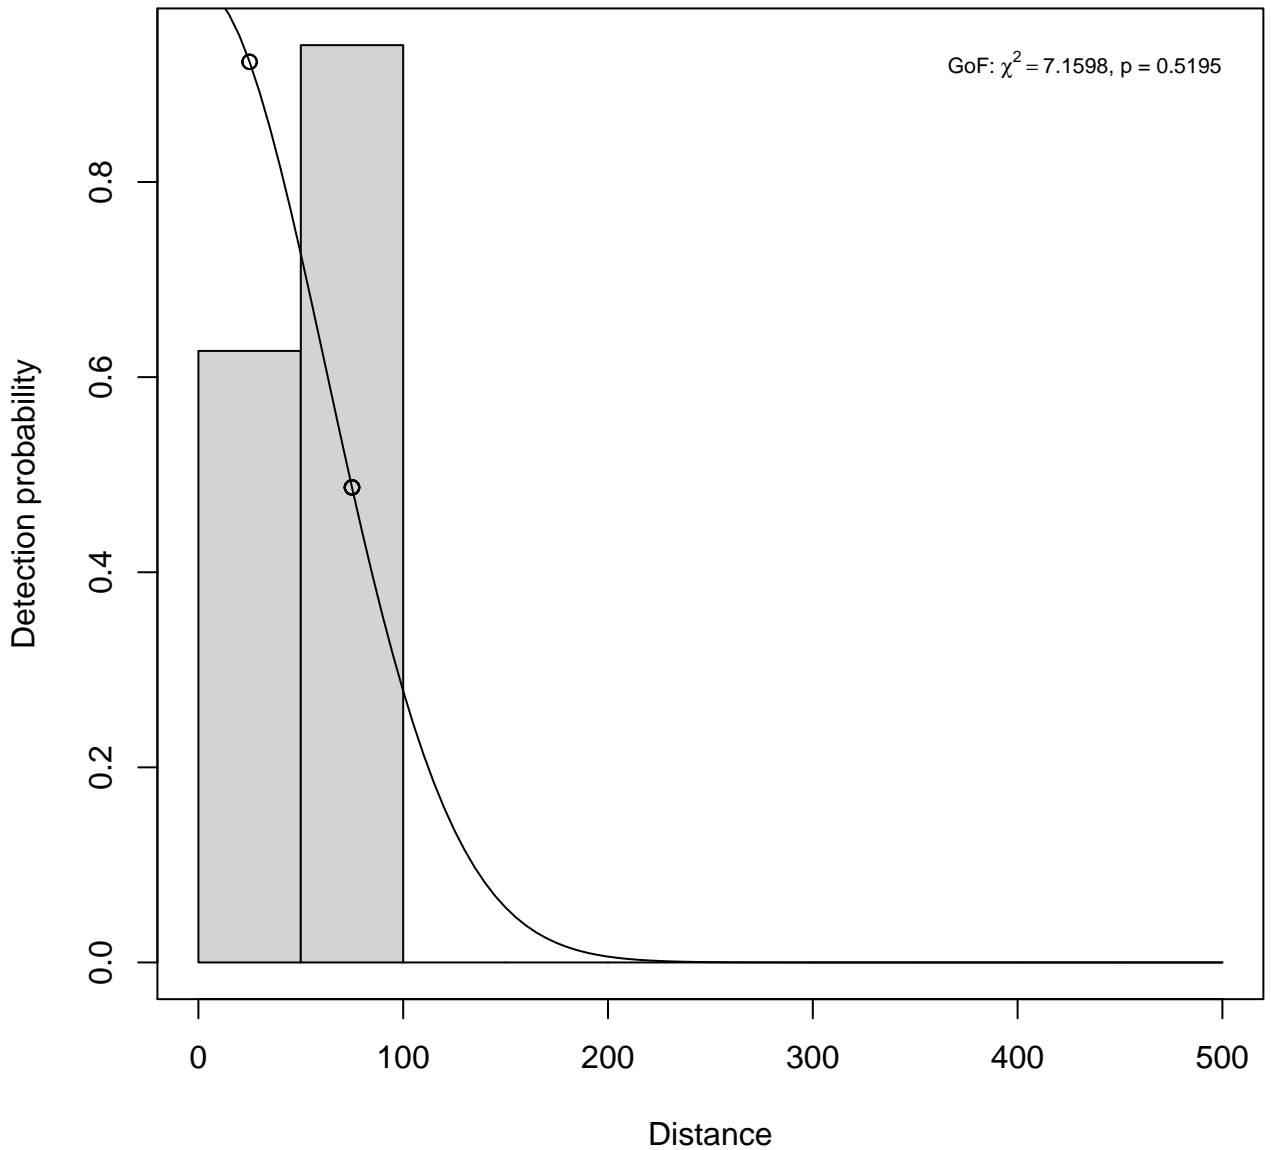

Supplement: s1 [file s1]
