# Supplementary material
Source: MDPI journal article supplement (https://www.mdpi.com/1424-2818/13/7/300)

# **Myiopsitta monachus – Dry Chaco – Bolivia**

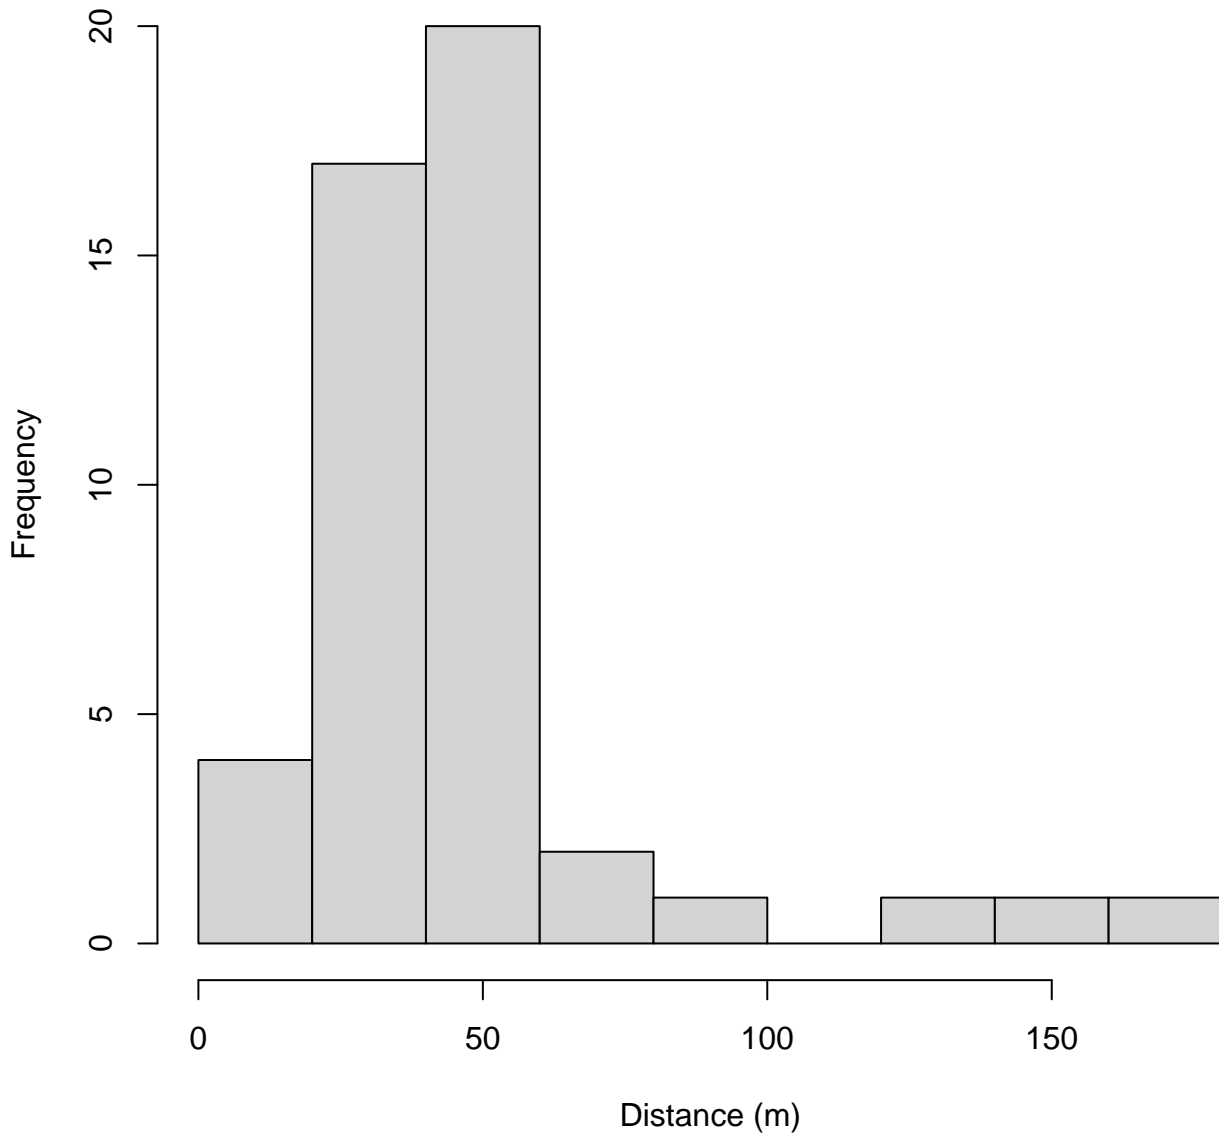

# Myiopsitta monachus – Dry Chaco – Bolivia

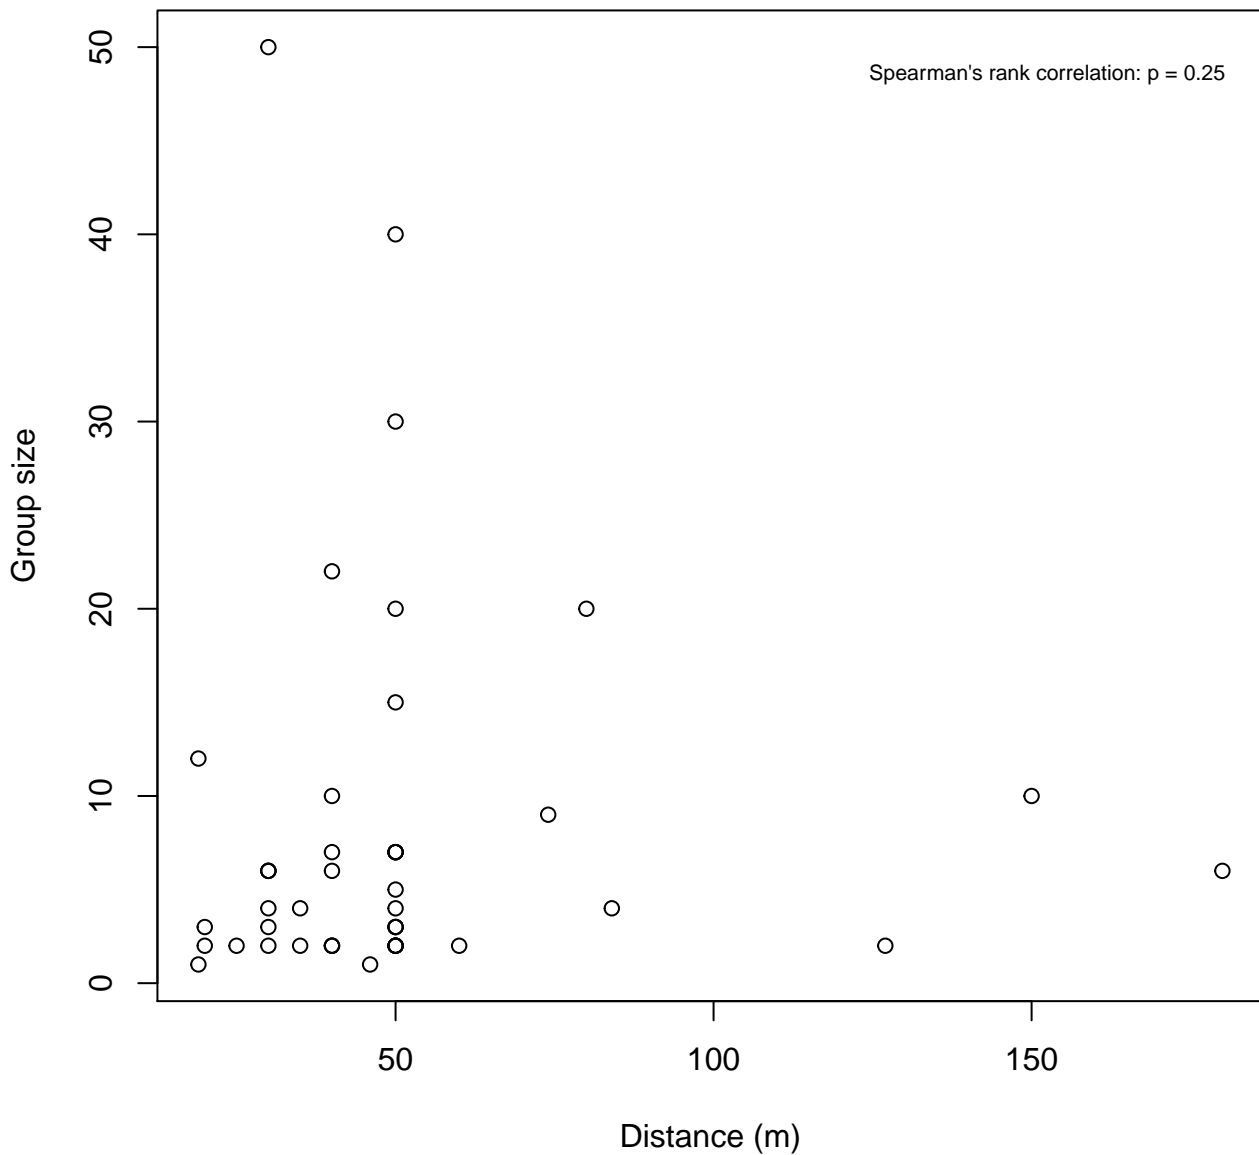

*Myiopsitta monachus* – Dry Chaco – Bolivia (N = 47, key function = hn)

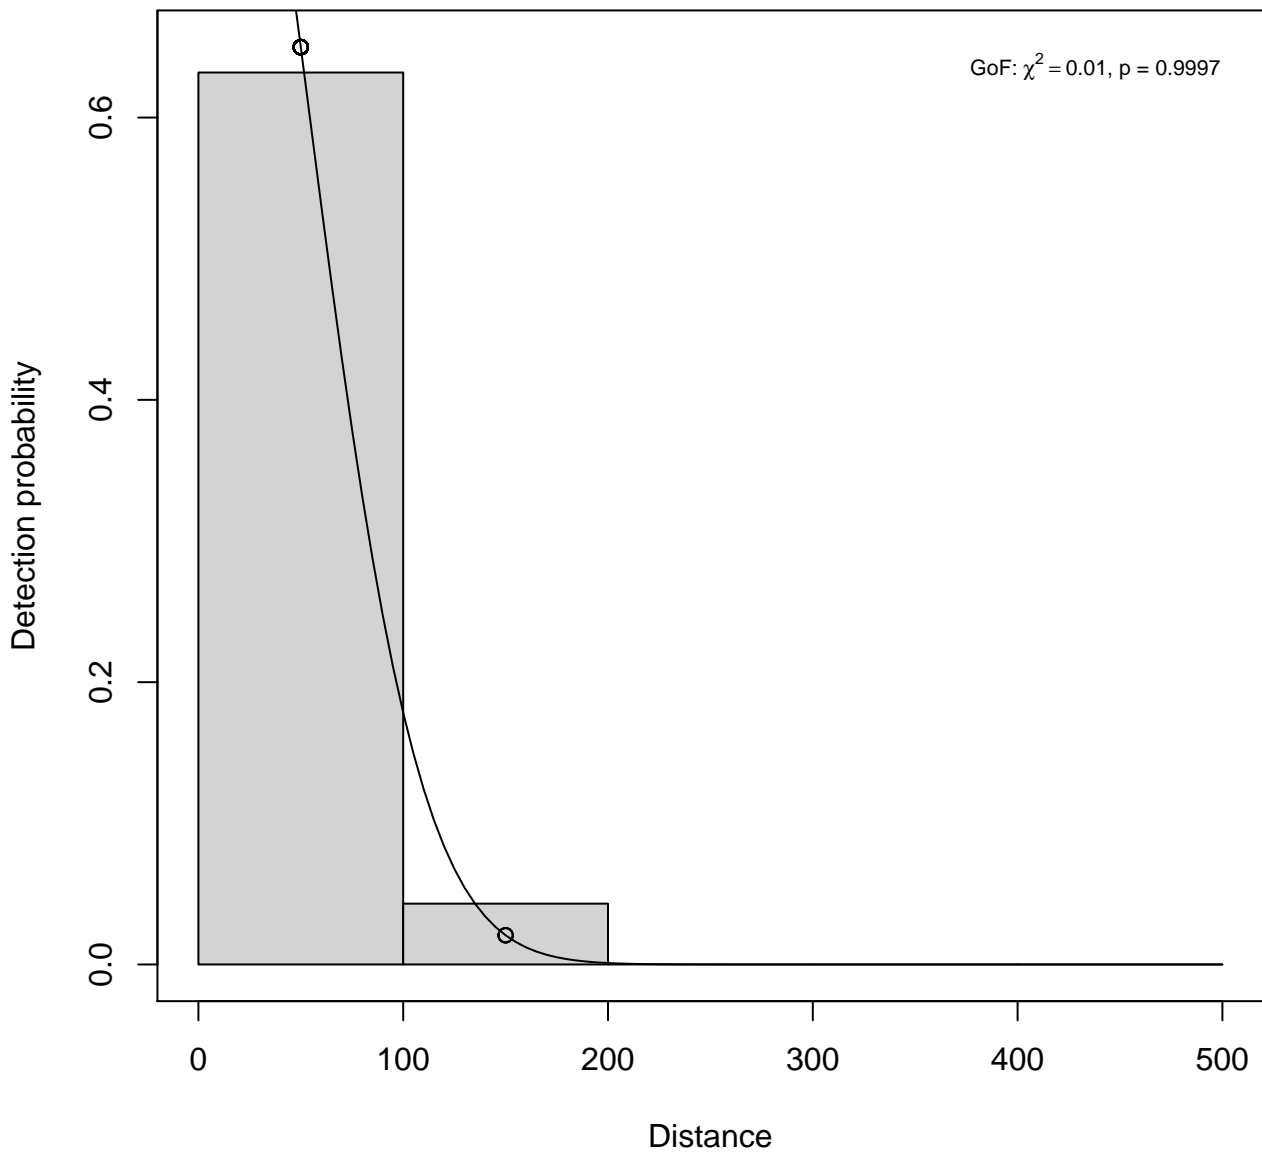

Myiopsitta monachus – Dry Chaco – Bolivia (N = 47, key function = hr)

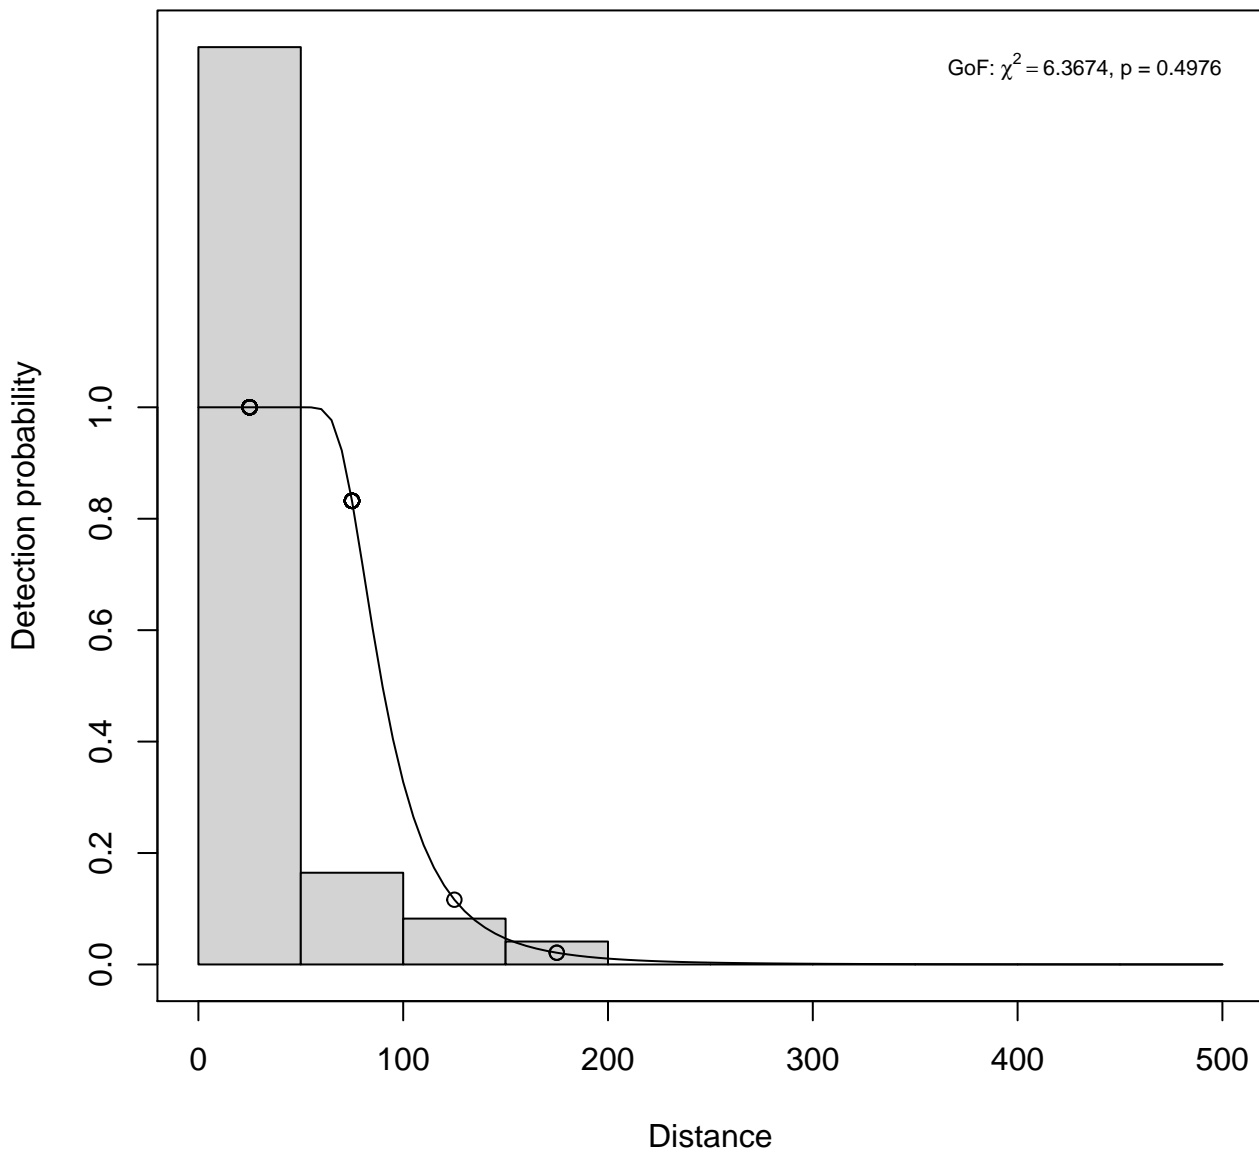

Myiopsitta monachus – Dry Chaco – Bolivia (N = 47, key function = hr)

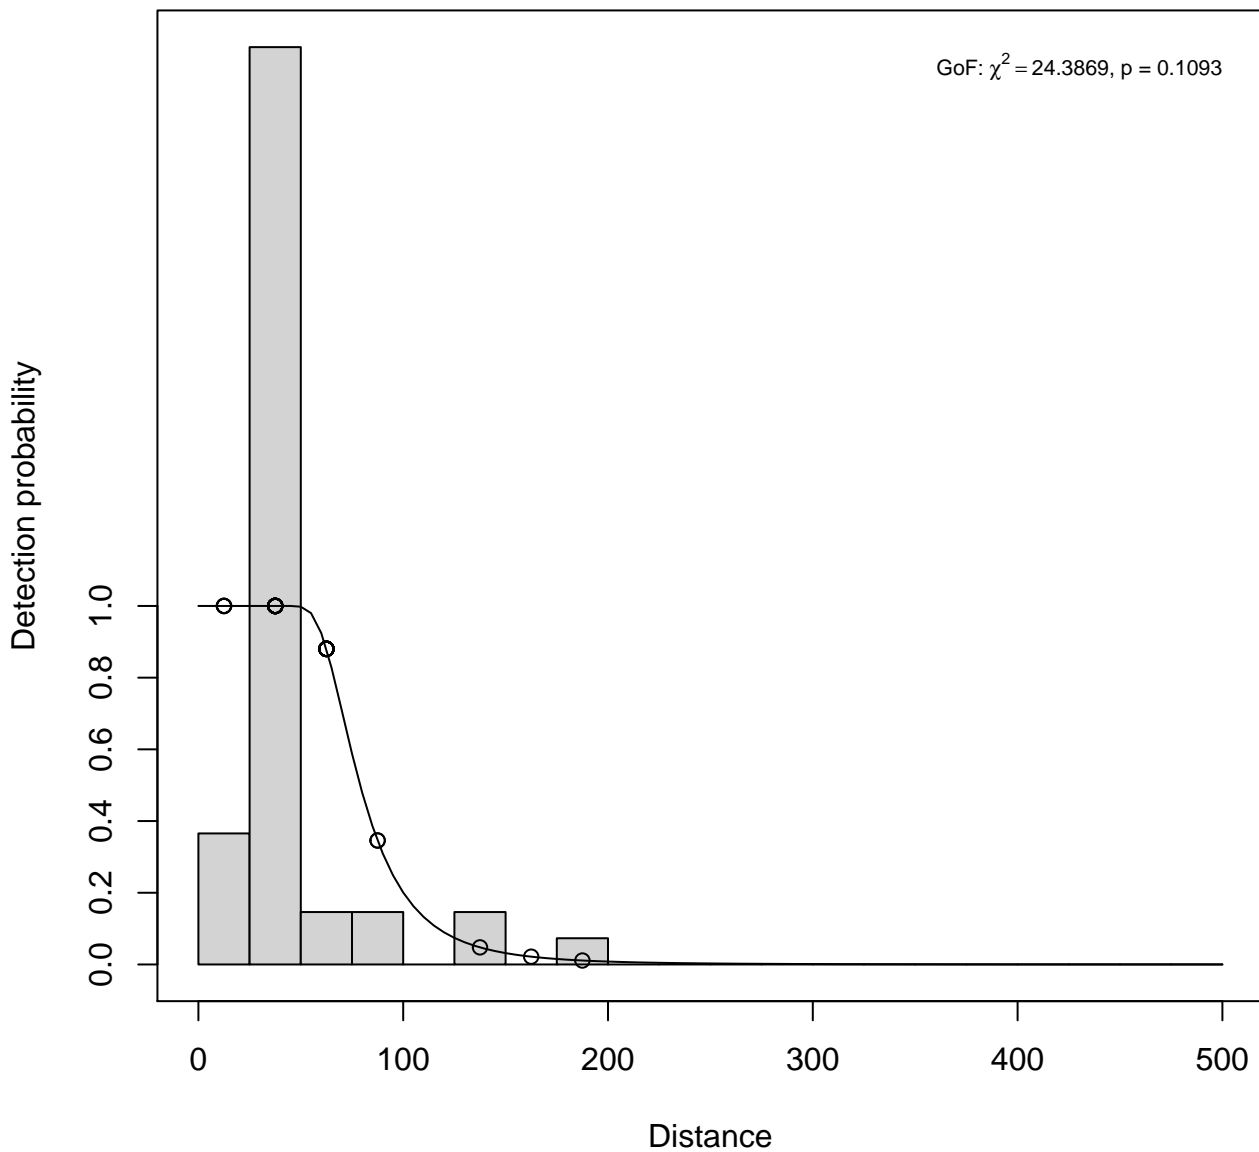

Supplement: s1 [file s1]
