# Supplementary material
Source: MDPI journal article supplement (https://www.mdpi.com/1424-2818/13/7/300)

# Amazona aestiva – Dry Chaco – Paraguay

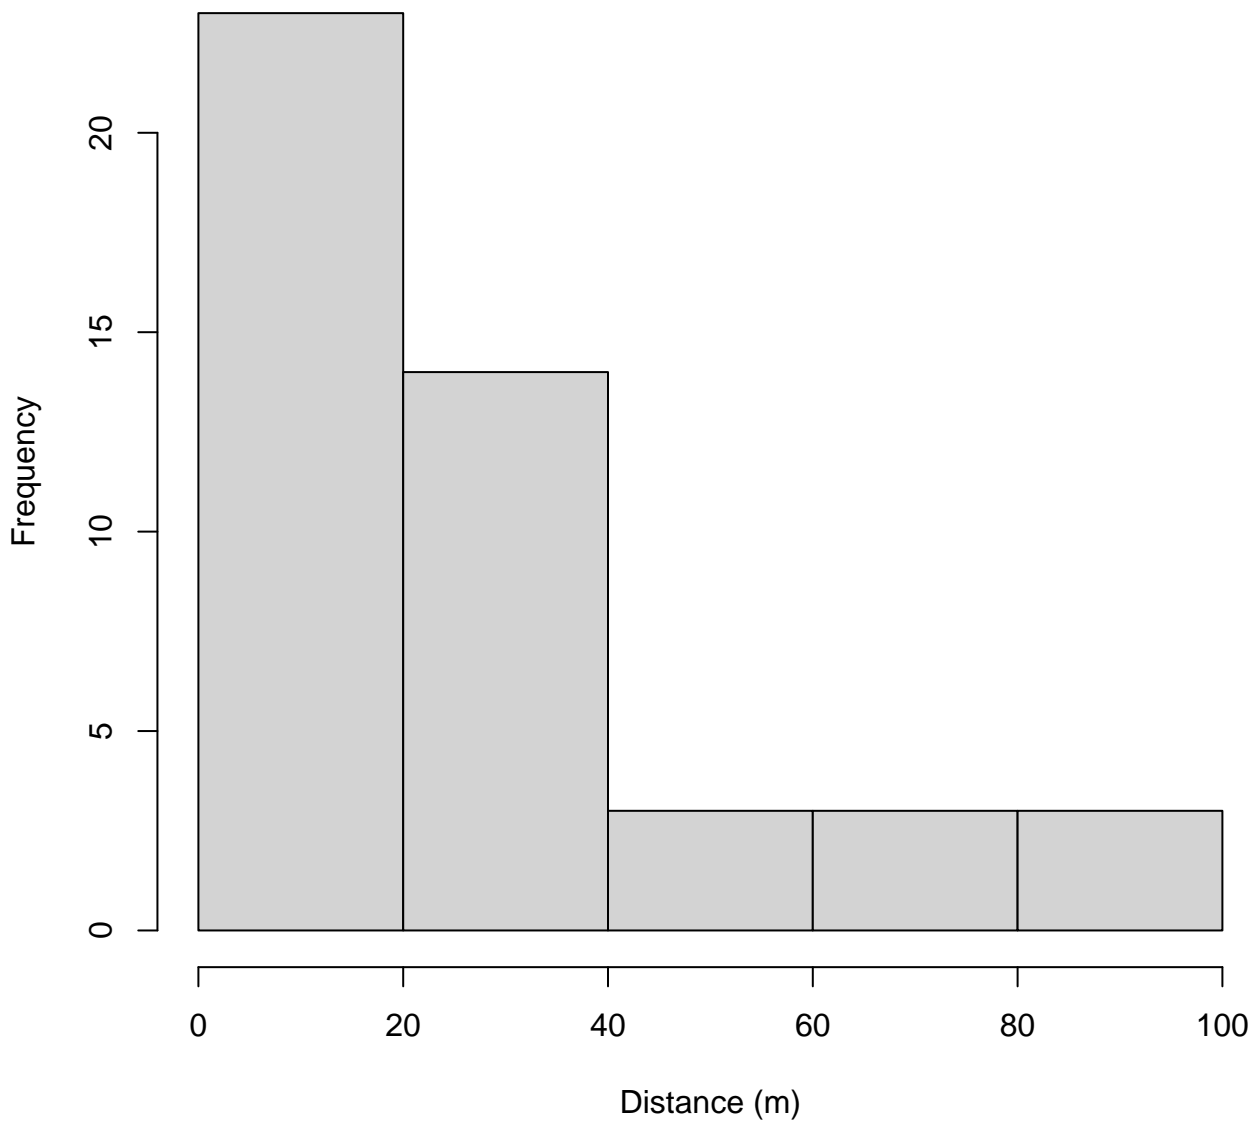

# Amazona aestiva – Dry Chaco – Paraguay

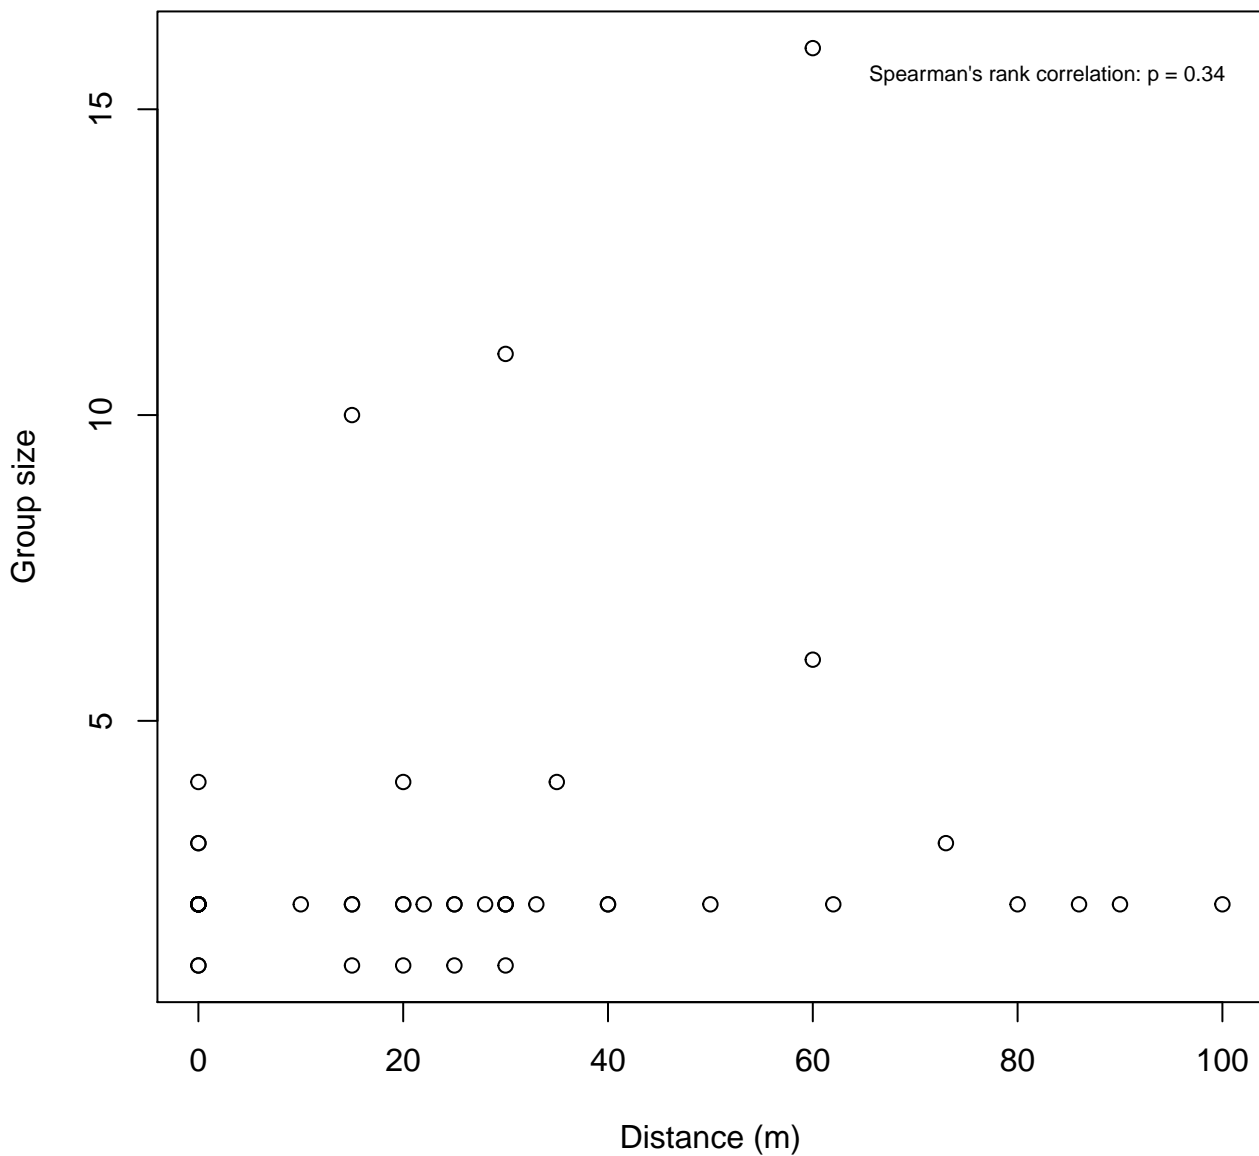

Amazona aestiva – Dry Chaco – Paraguay (N = 46, key function = hn)

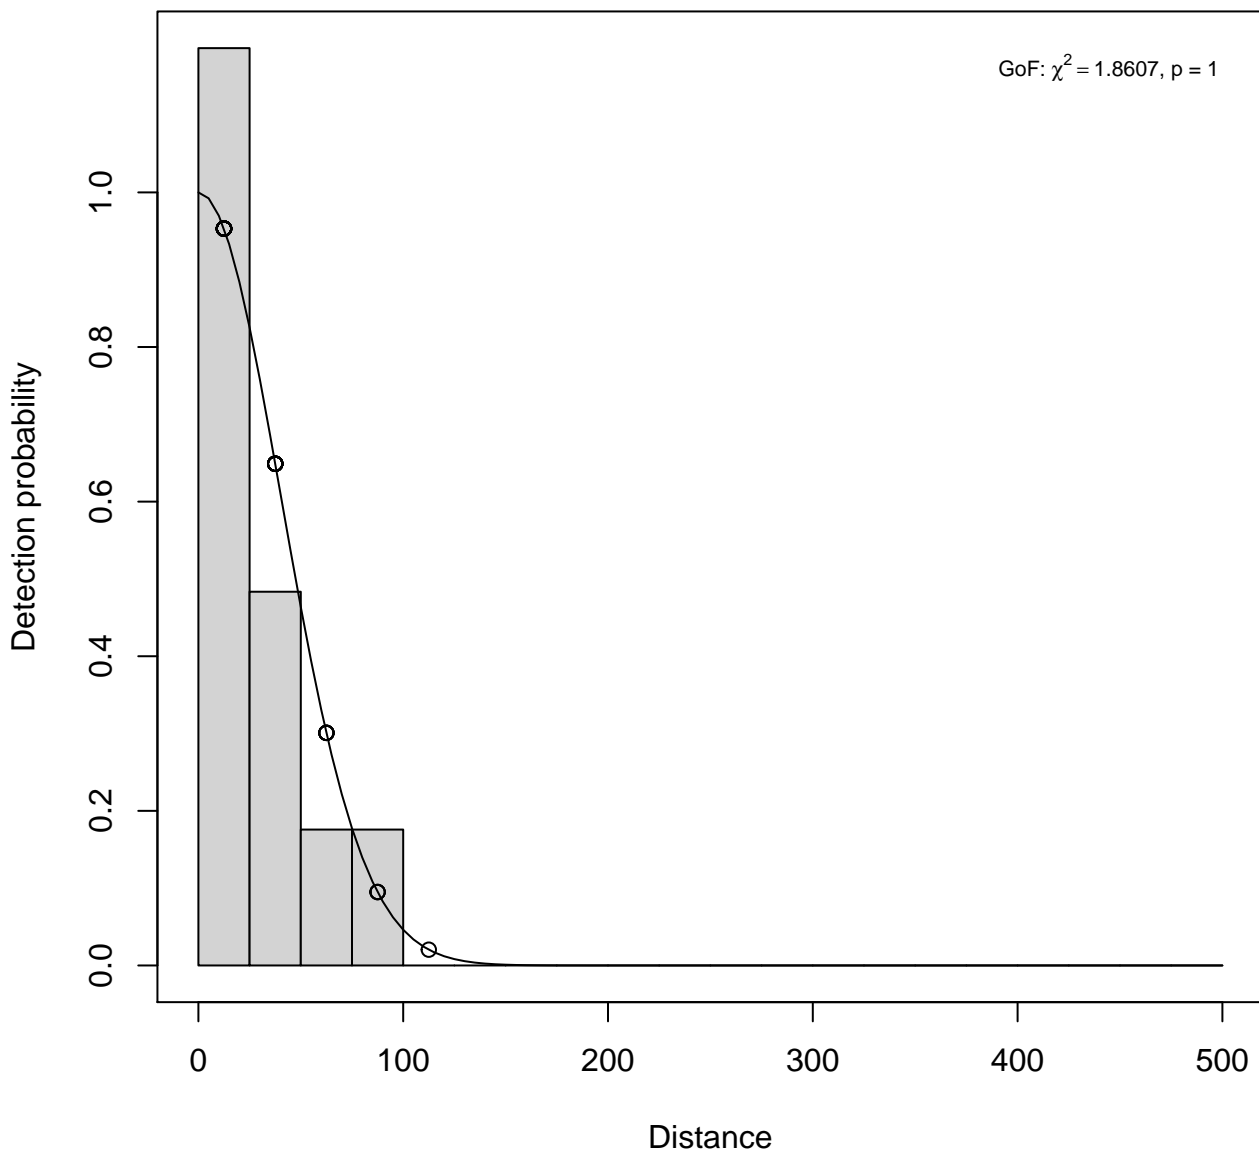

*Amazona aestiva* – Dry Chaco – Paraguay (N = 46, key function = hn)

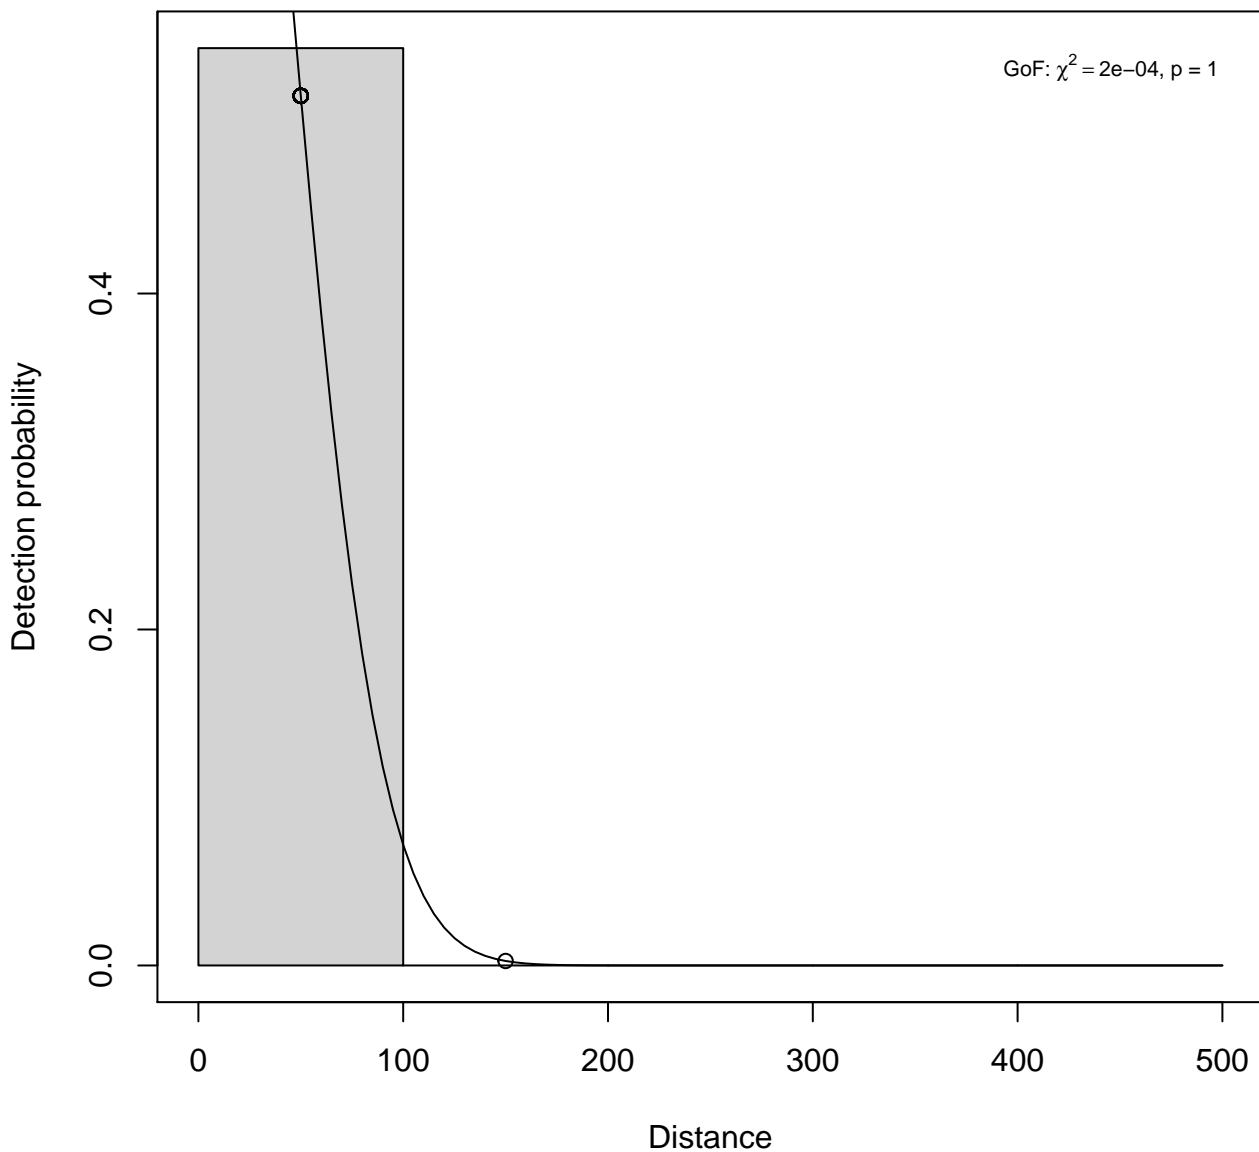

*Amazona aestiva* – Dry Chaco – Paraguay (N = 46, key function = hn)

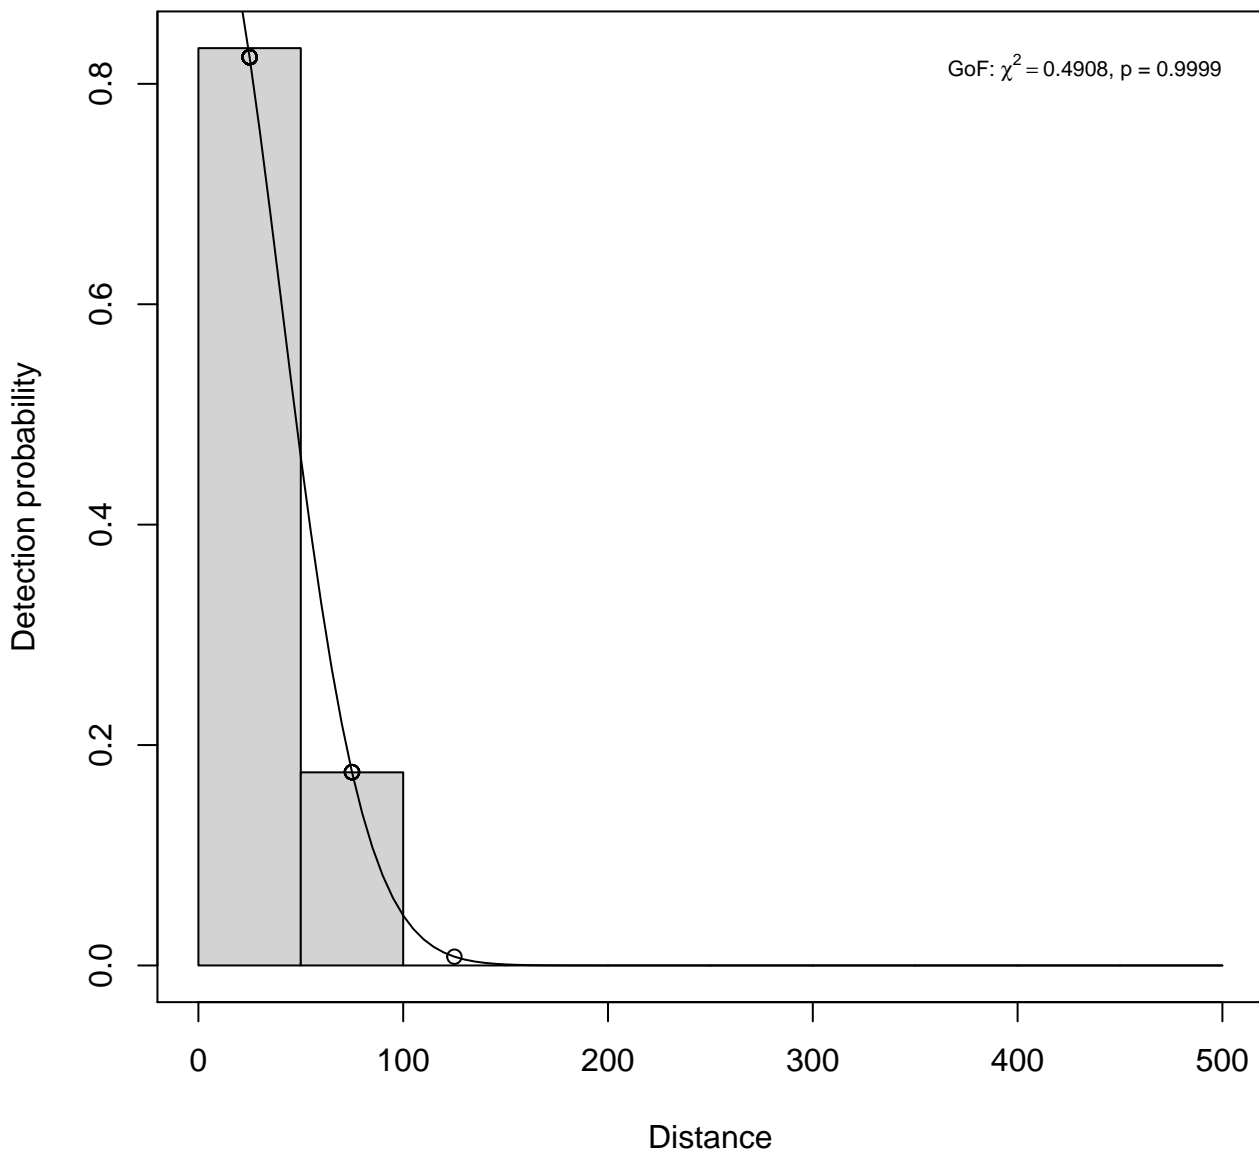

Supplement: s1 [file s1]
