# Supplementary material
Source: MDPI journal article supplement (https://www.mdpi.com/1424-2818/13/7/300)

# Forpus coelestis – Western Ecuador moist forests – Ecuador

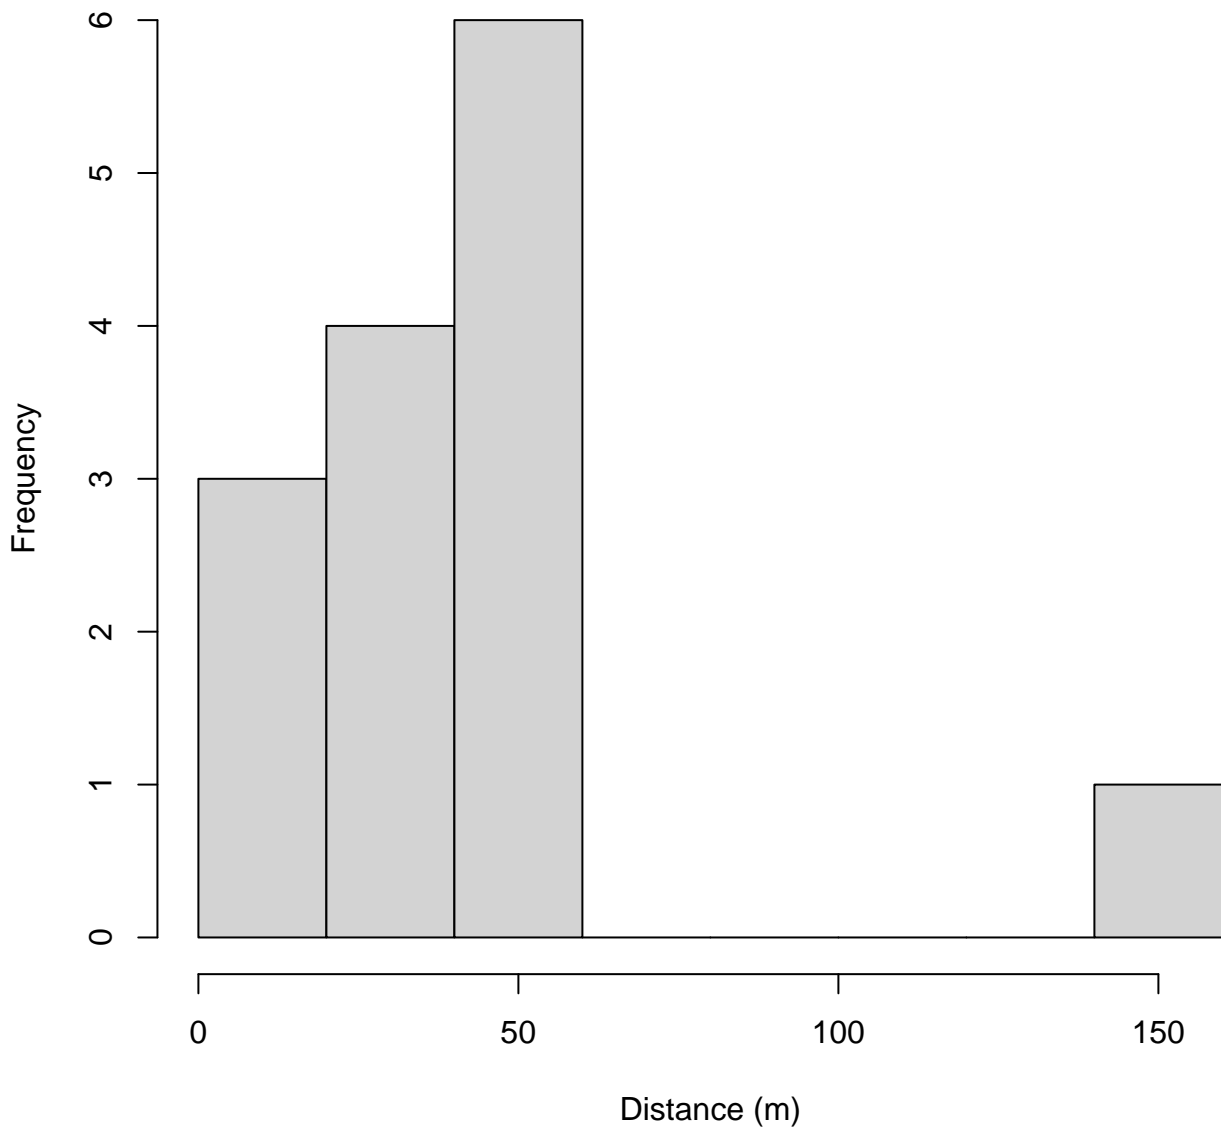

# Forpus coelestis – Western Ecuador moist forests – Ecuador

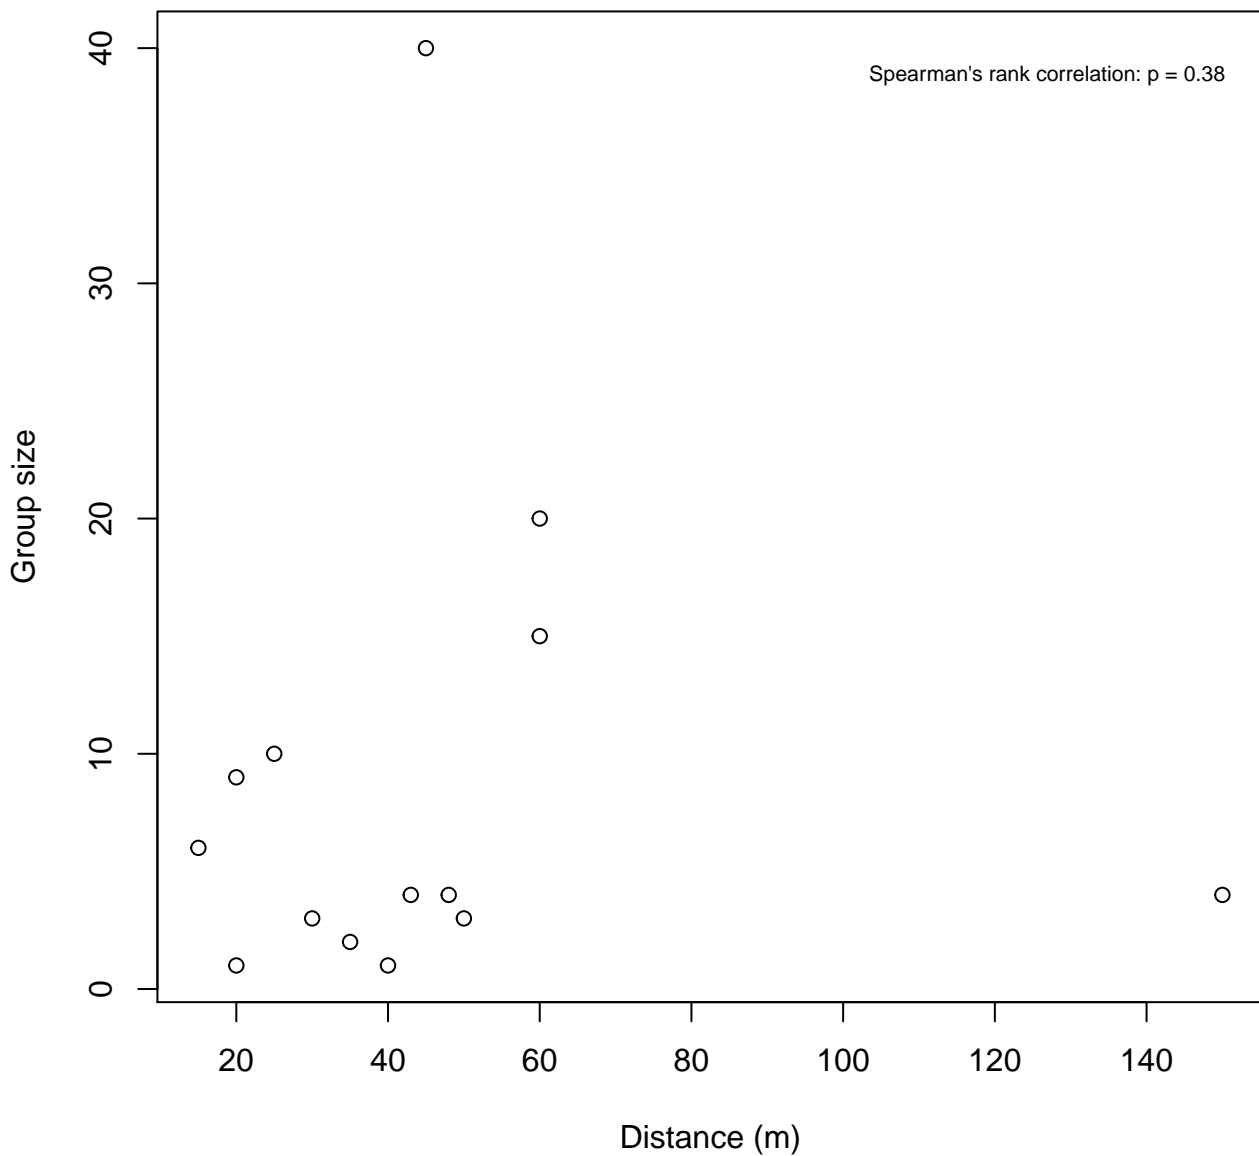

Forpus coelestis – Western Ecuador moist forests – Ecuador (N = 14, key function = hn)

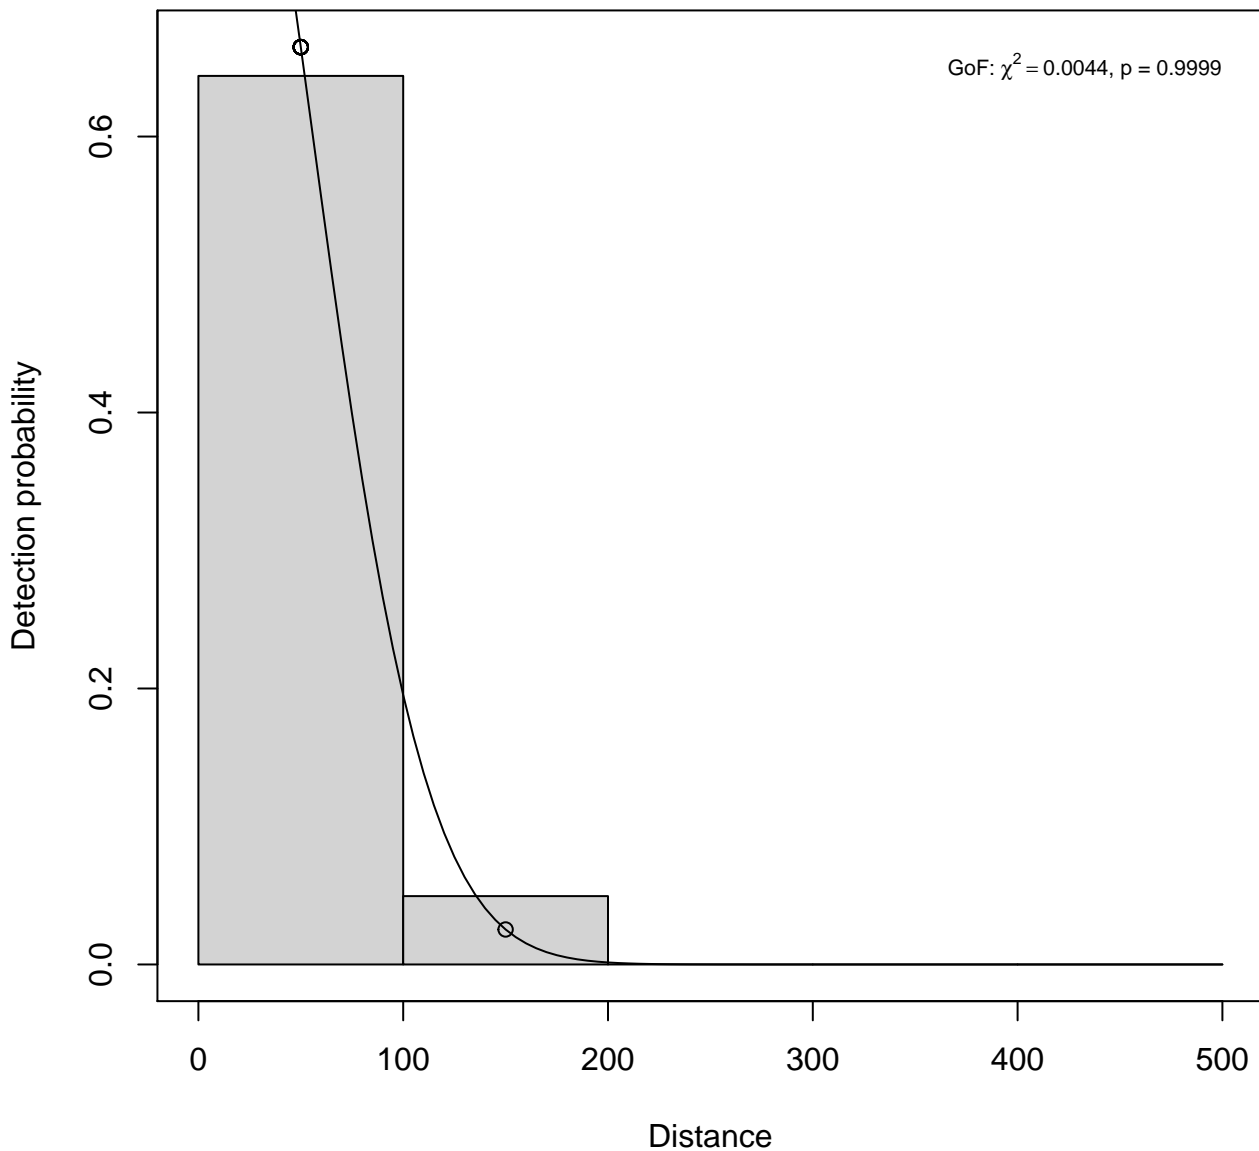

Forpus coelestis – Western Ecuador moist forests – Ecuador (N = 14, key function = hr)

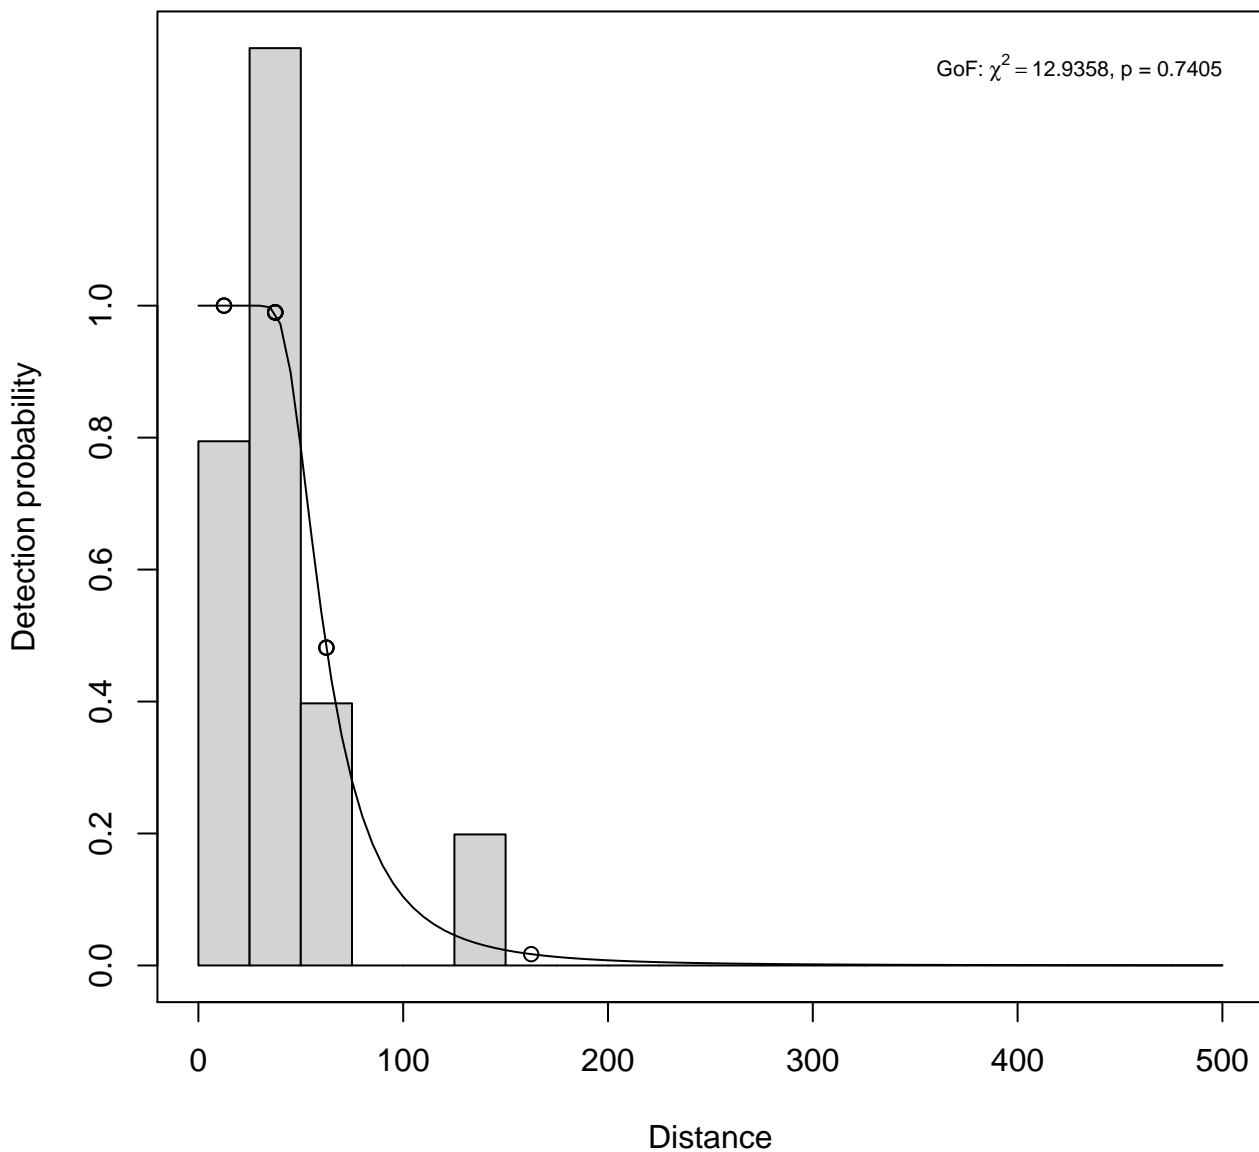

Forpus coelestis – Western Ecuador moist forests – Ecuador (N = 14, key function = hn)

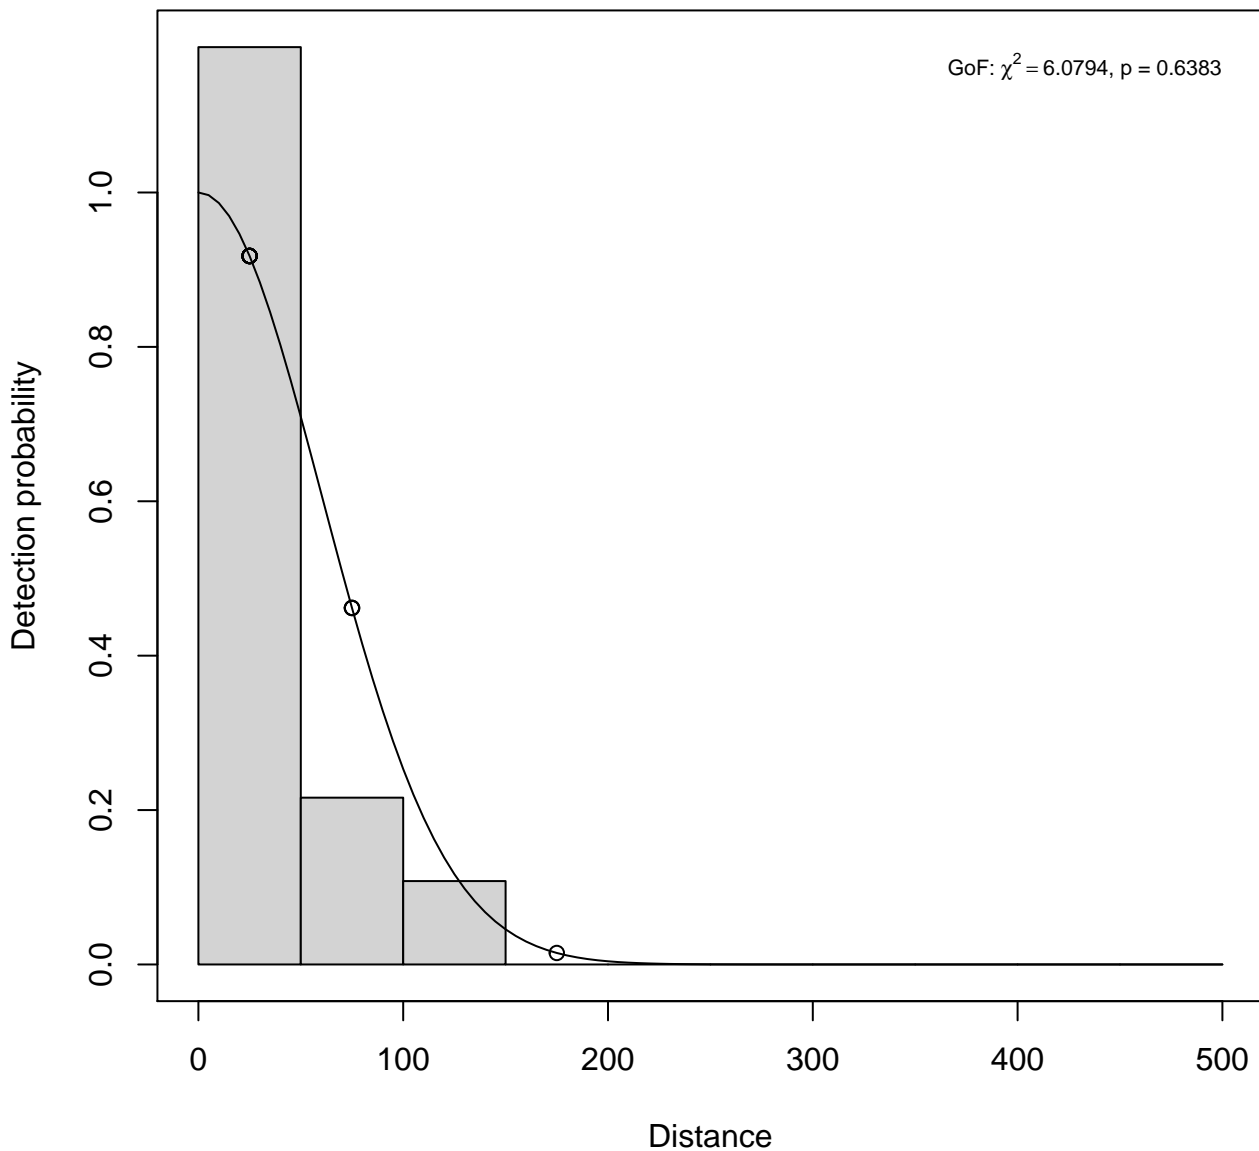

Supplement: s1 [file s1]
