# Supplementary material
Source: MDPI journal article supplement (https://www.mdpi.com/1424-2818/13/7/300)

# **Pionus menstruus – Cordillera Oriental montane forests – Colombia**

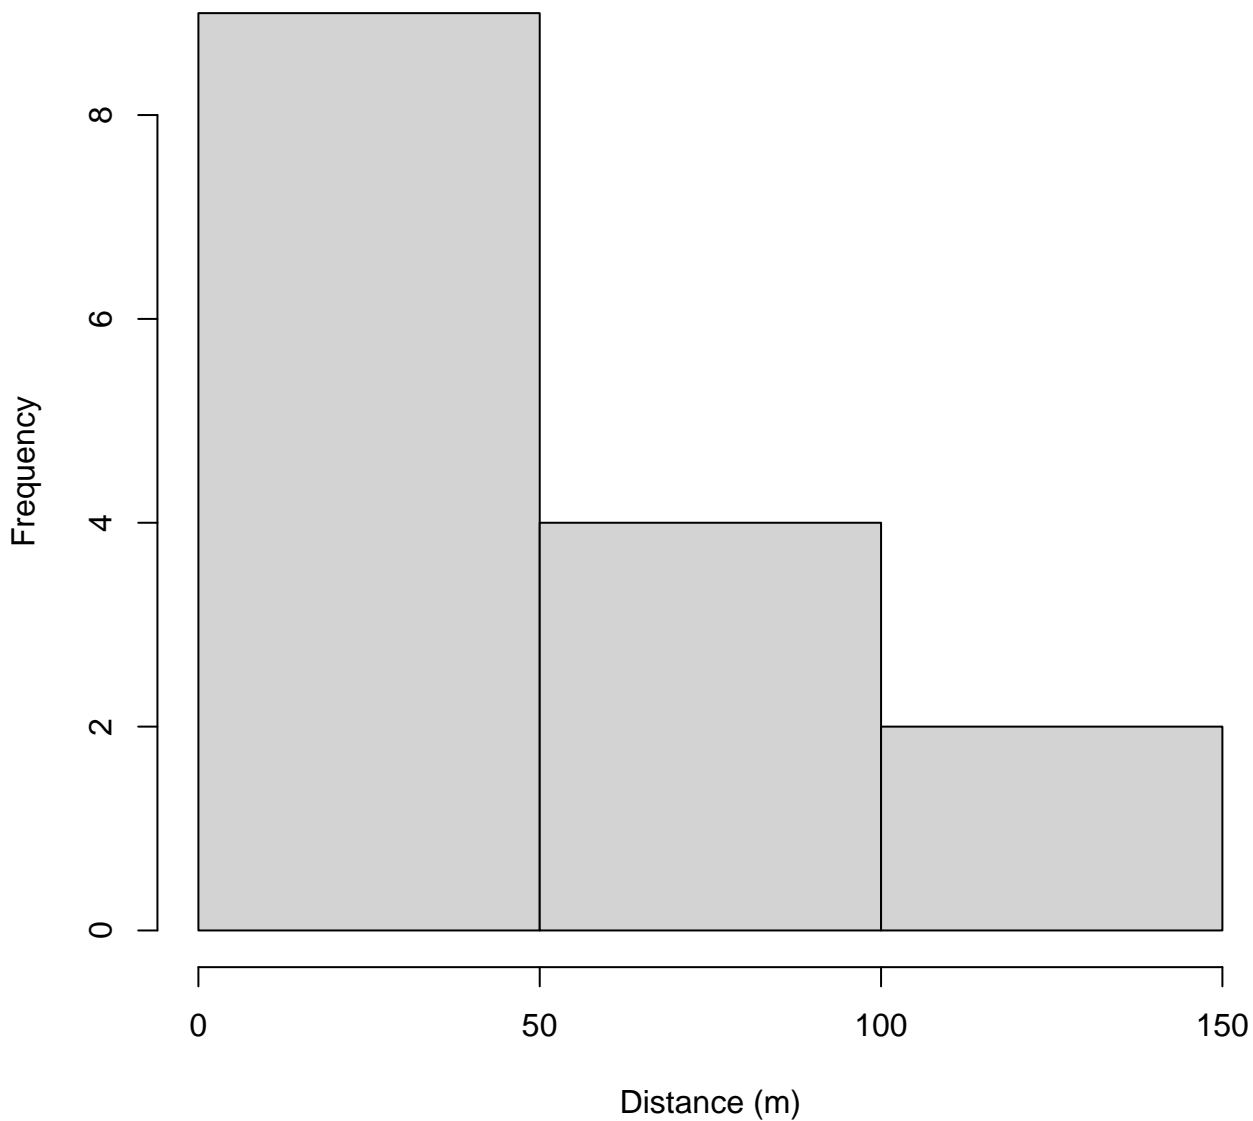

# Pionus menstruus – Cordillera Oriental montane forests – Colombia

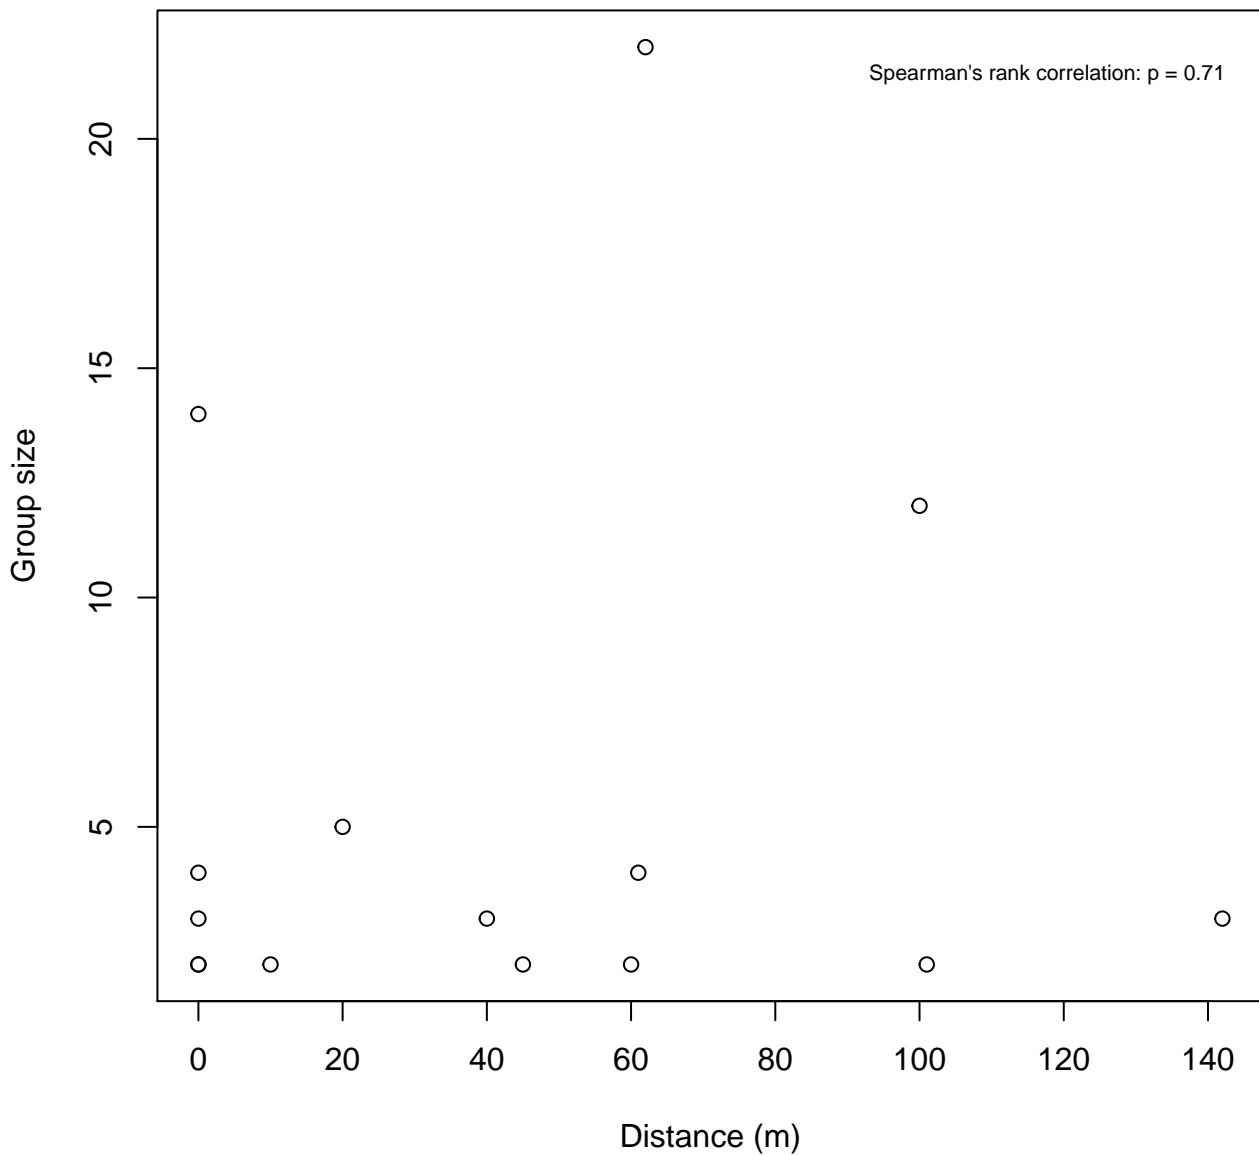

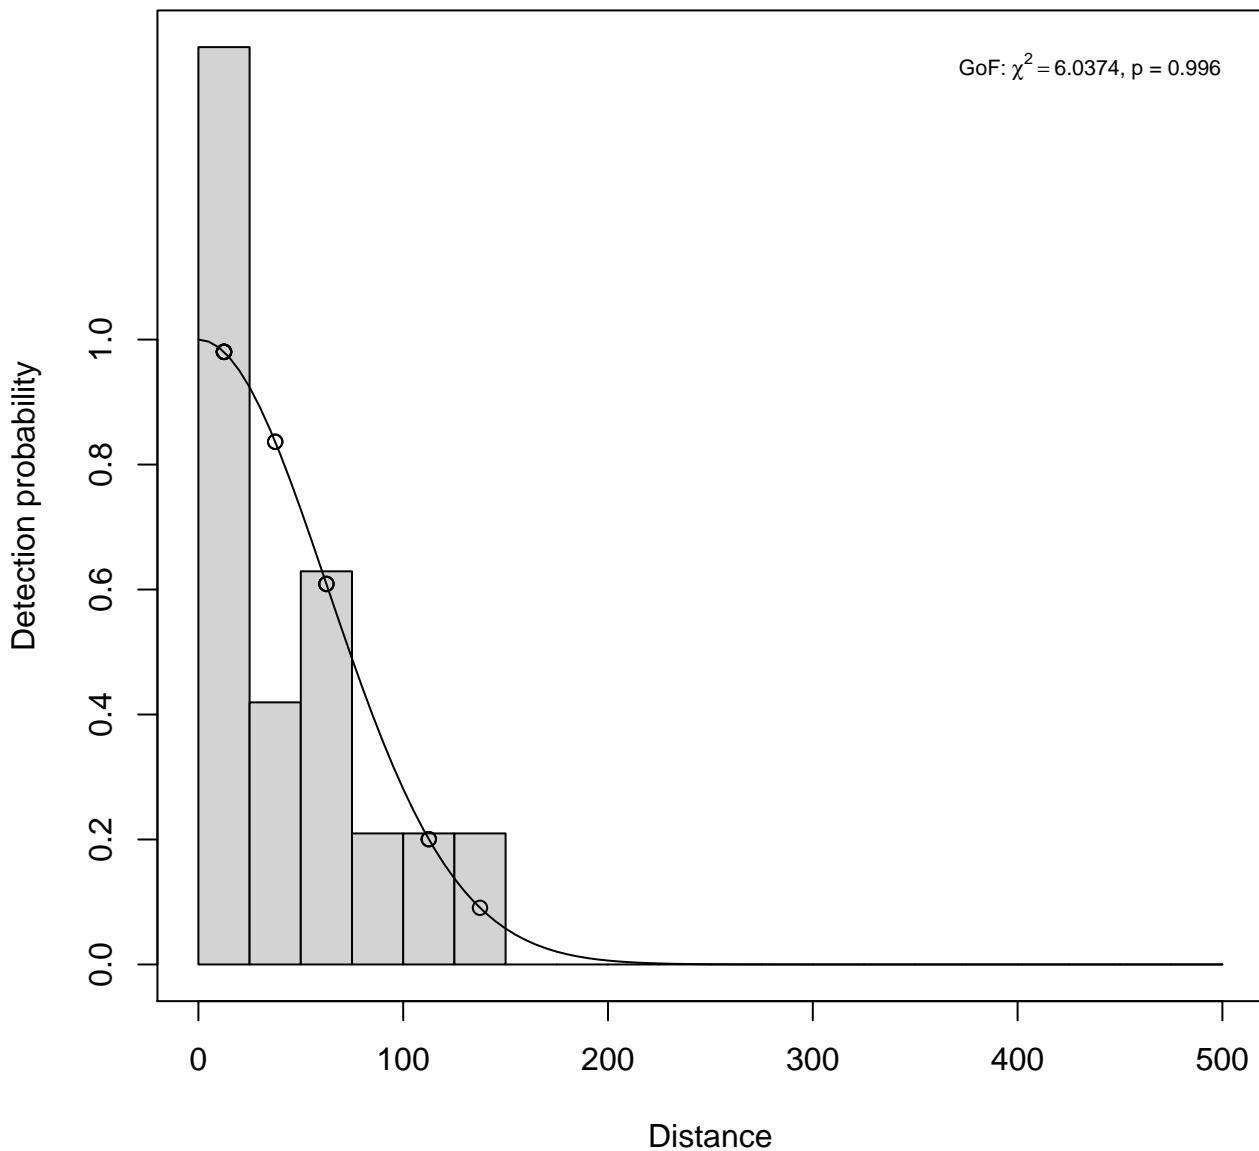

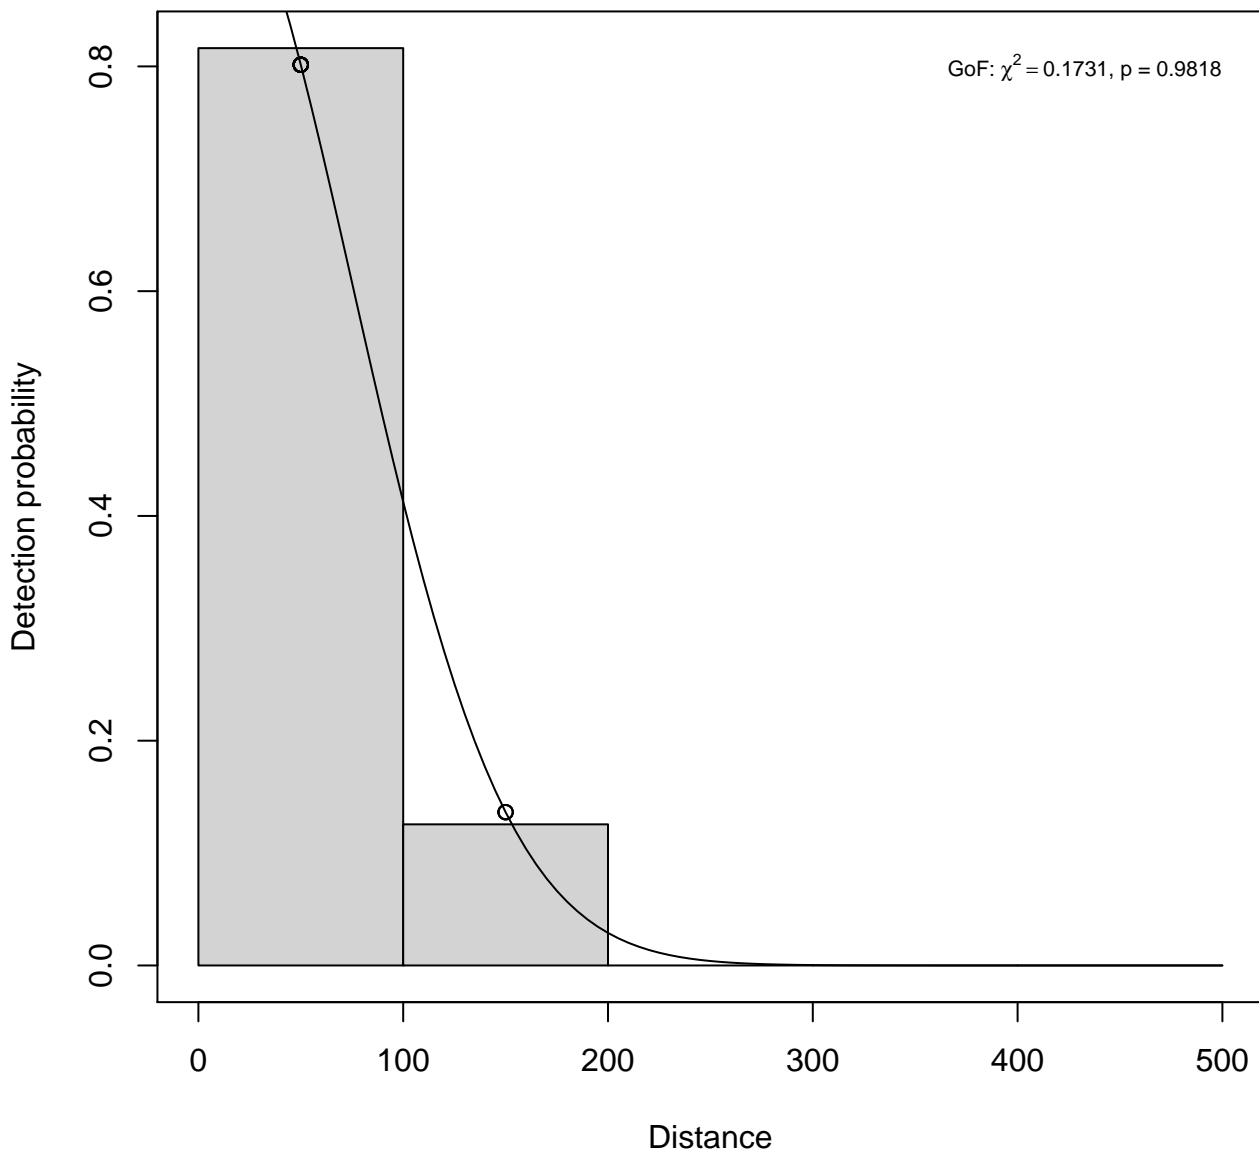

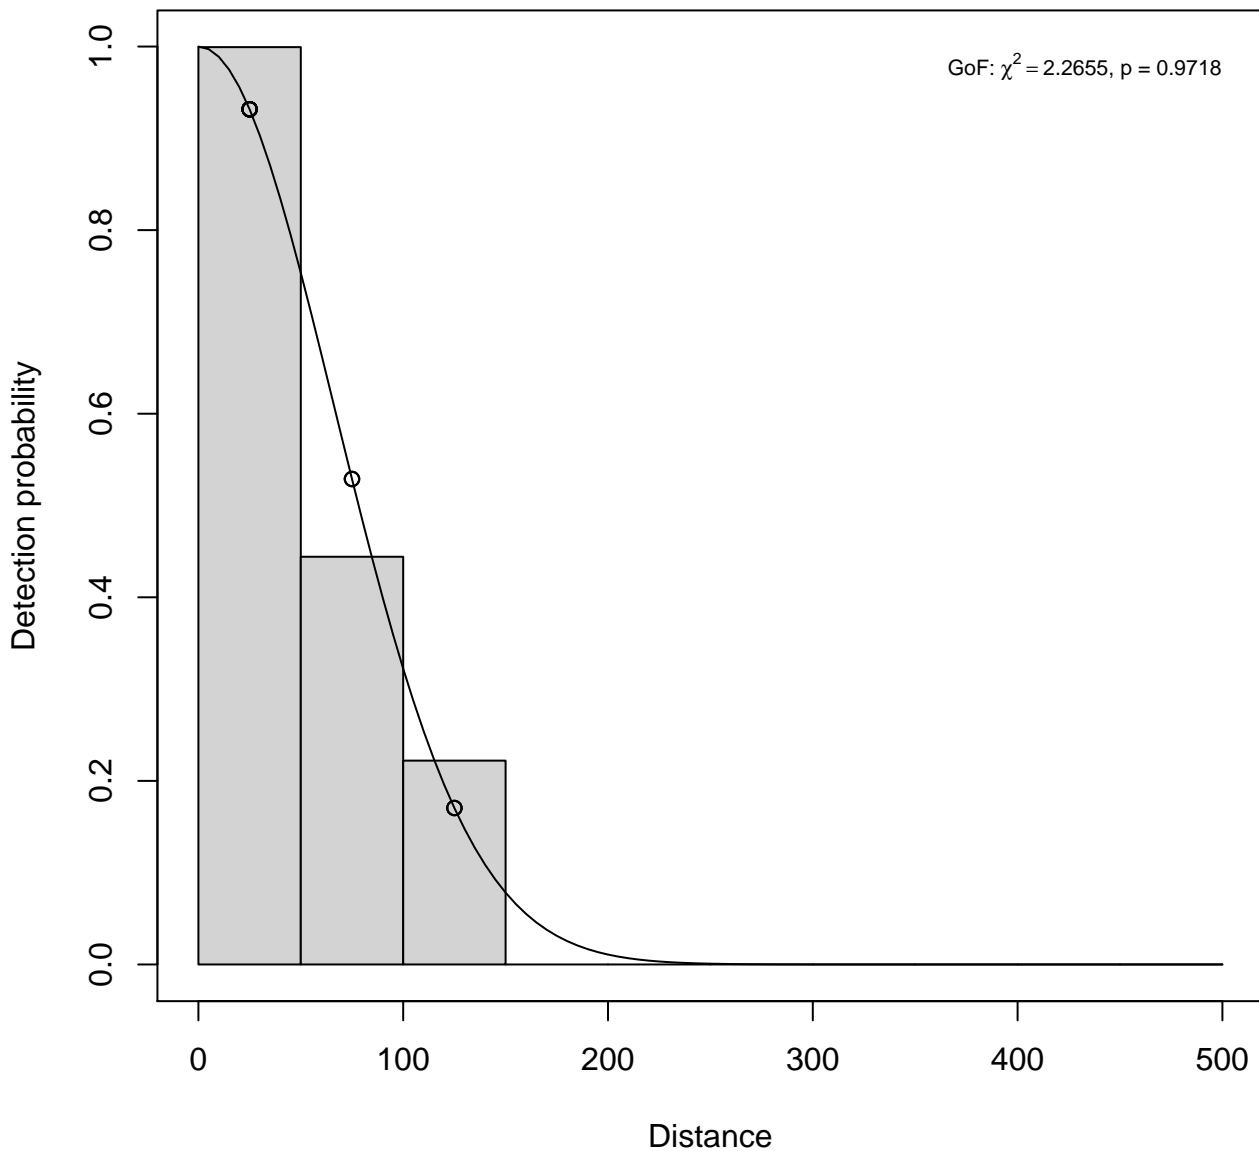

Supplement: s1 [file s1]
