# Supplementary material
Source: MDPI journal article supplement (https://www.mdpi.com/1424-2818/13/7/300)

# **Brotogeris chiriri – Beni savanna – Bolivia**

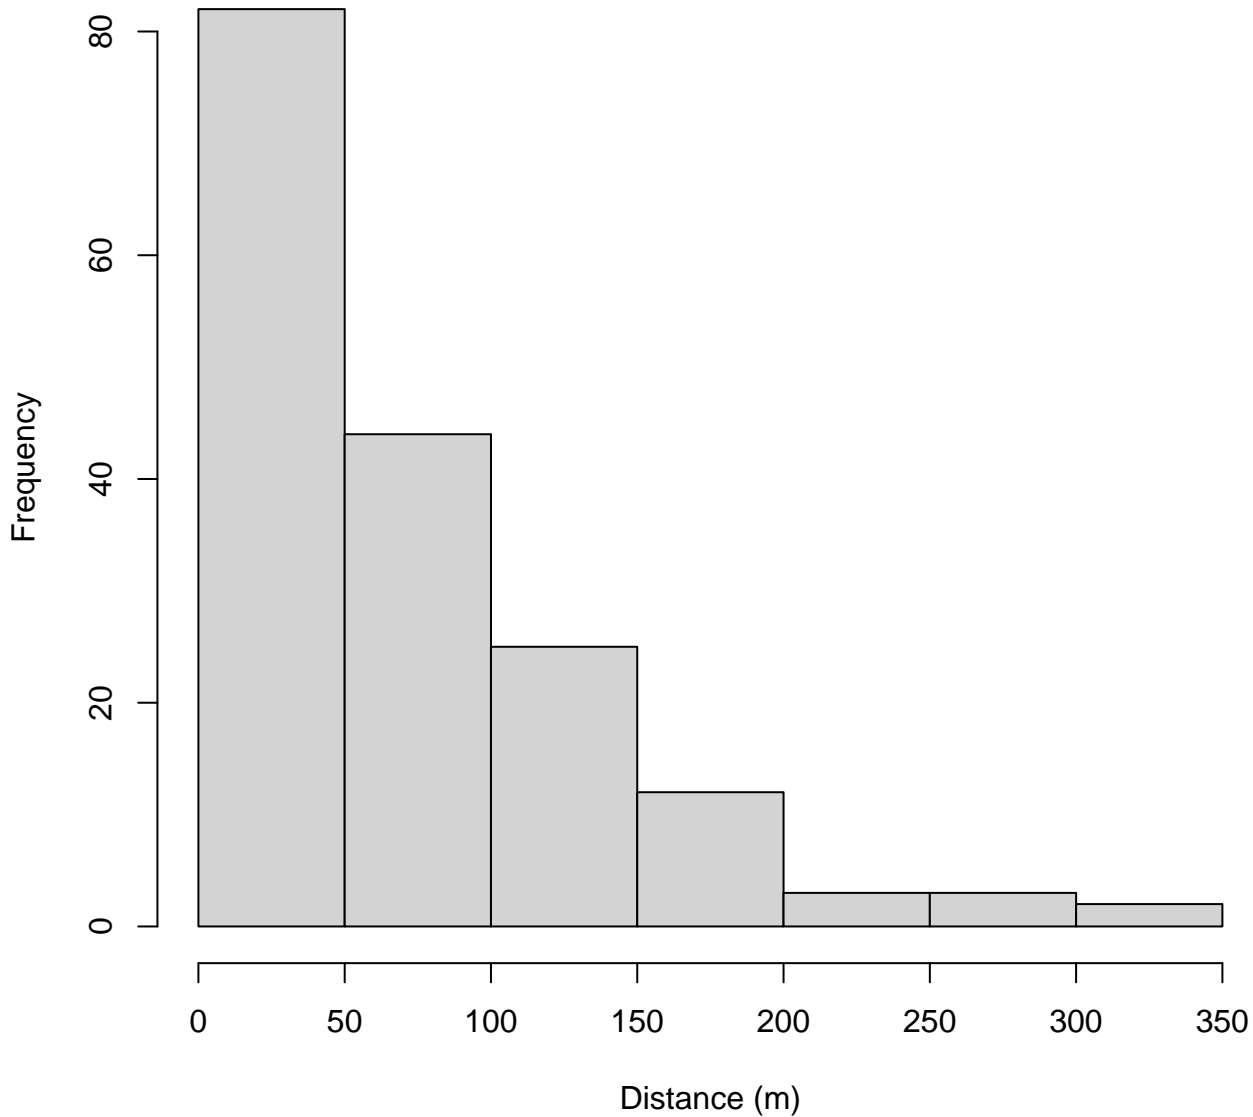

# Brotogeris chiriri – Beni savanna – Bolivia

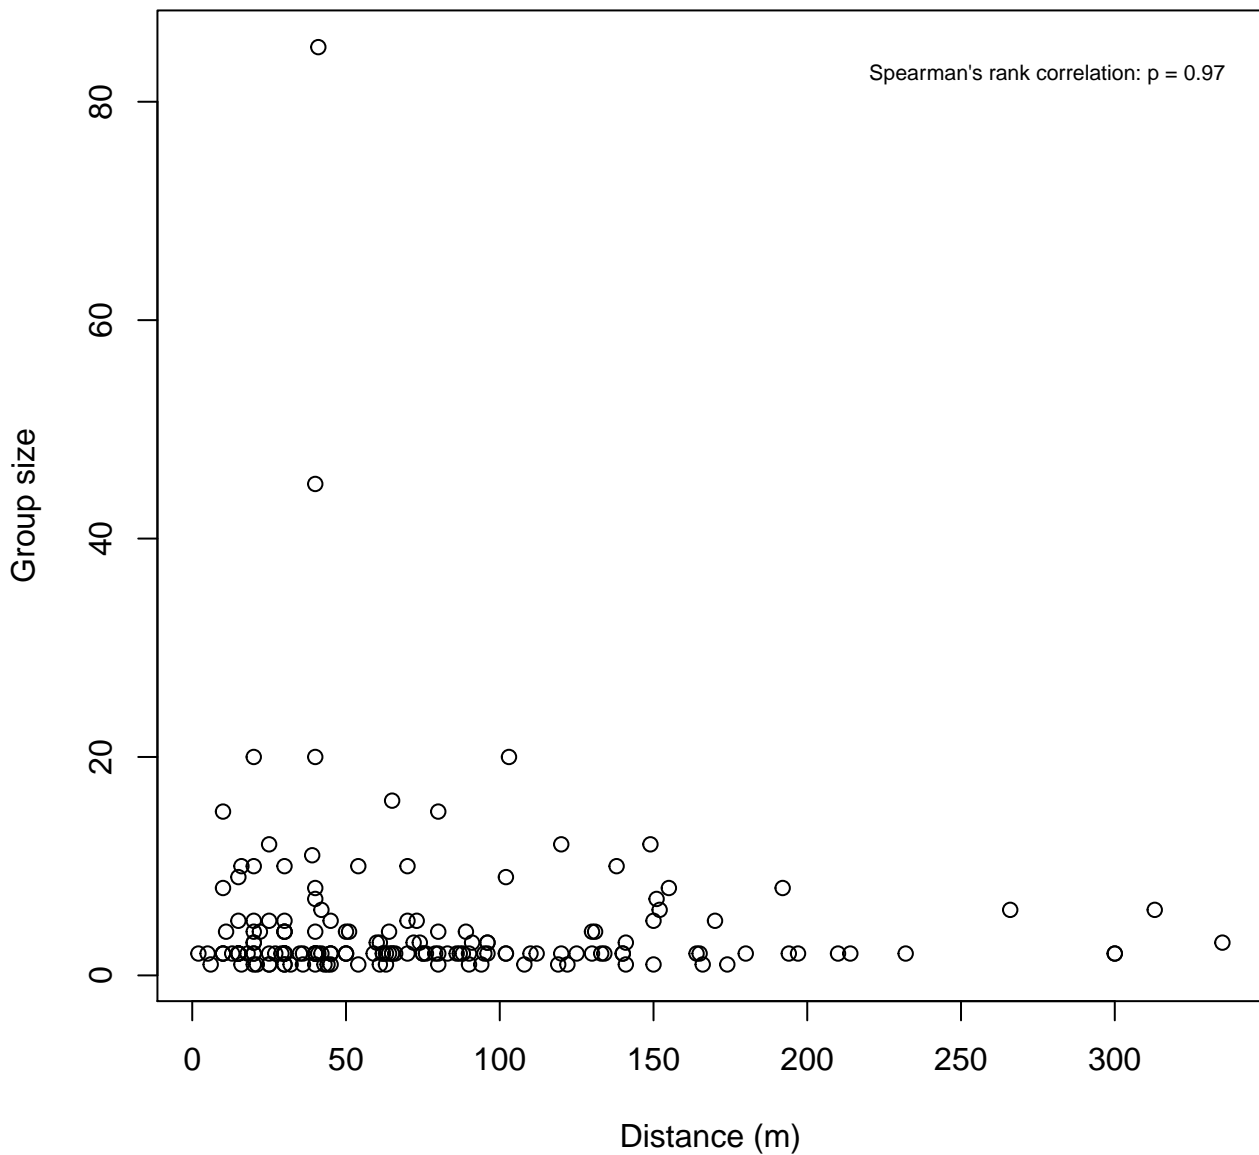

Brotogeris chiriri – Beni savanna – Bolivia (N = 171, key function = hn)

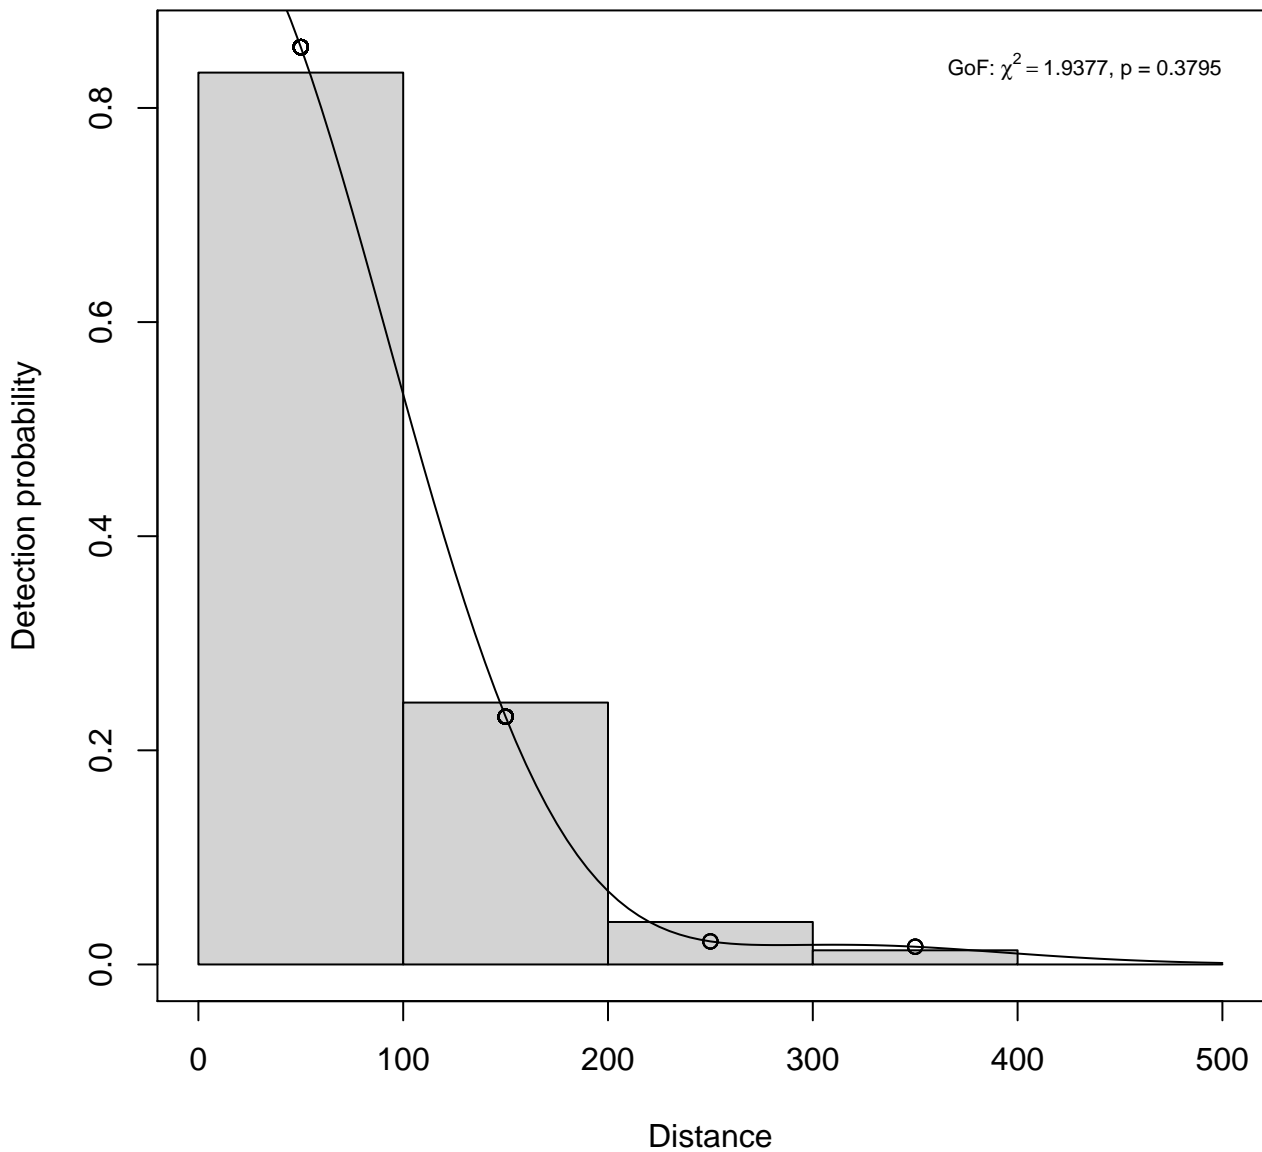

Brotoyeris chiriri – Beni savanna – Bolivia (N = 171, key function = hn)

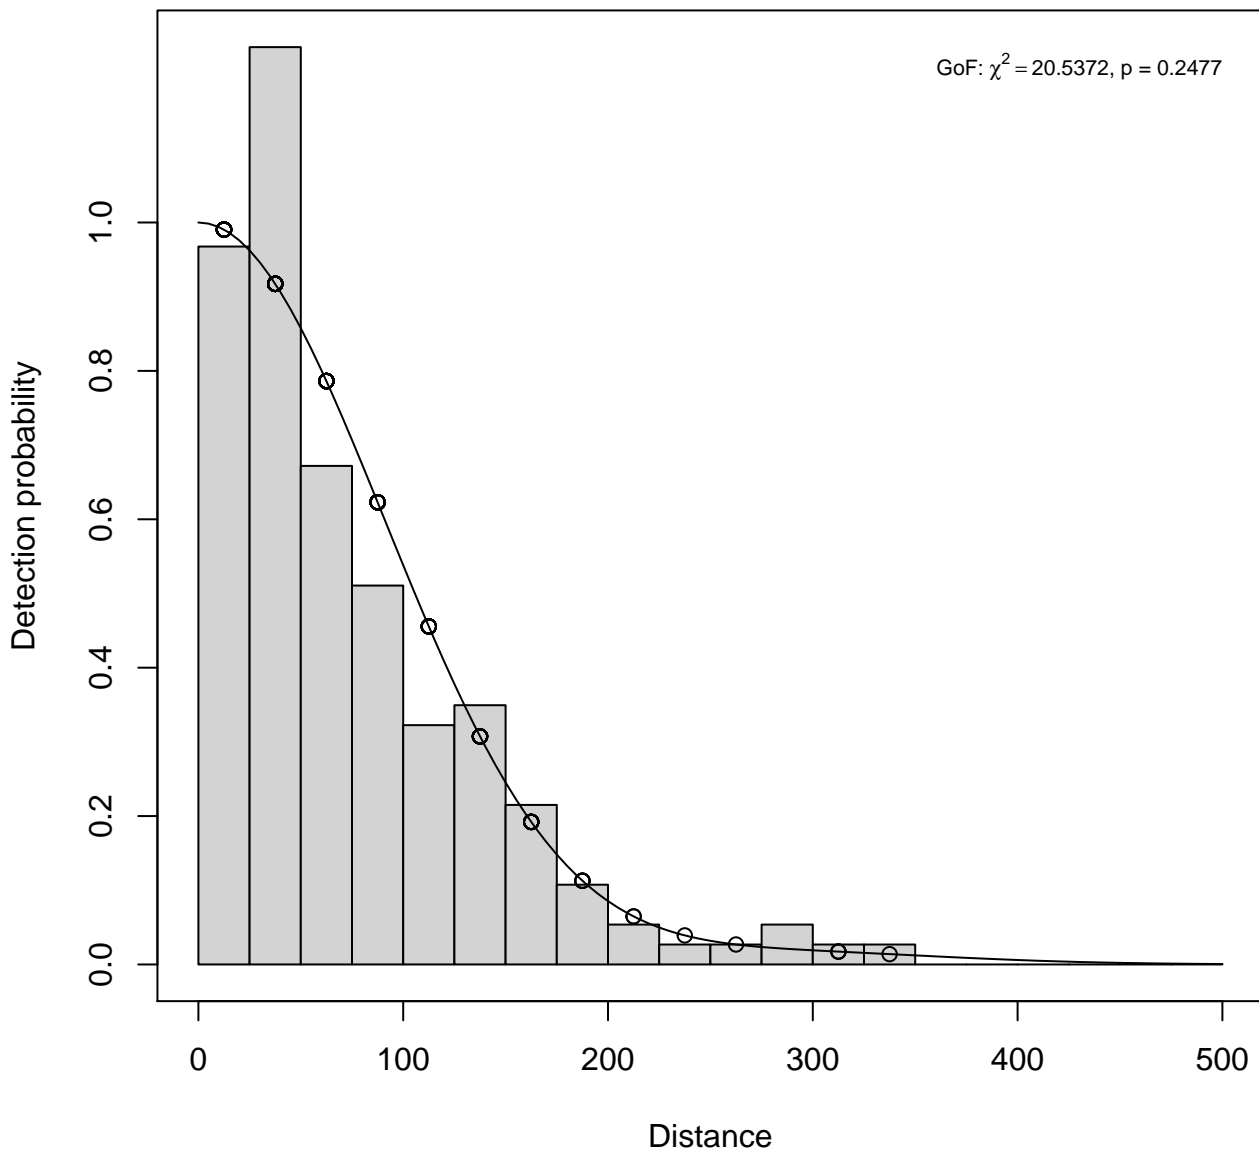

Brotogeris chiriri – Beni savanna – Bolivia (N = 171, key function = hn)

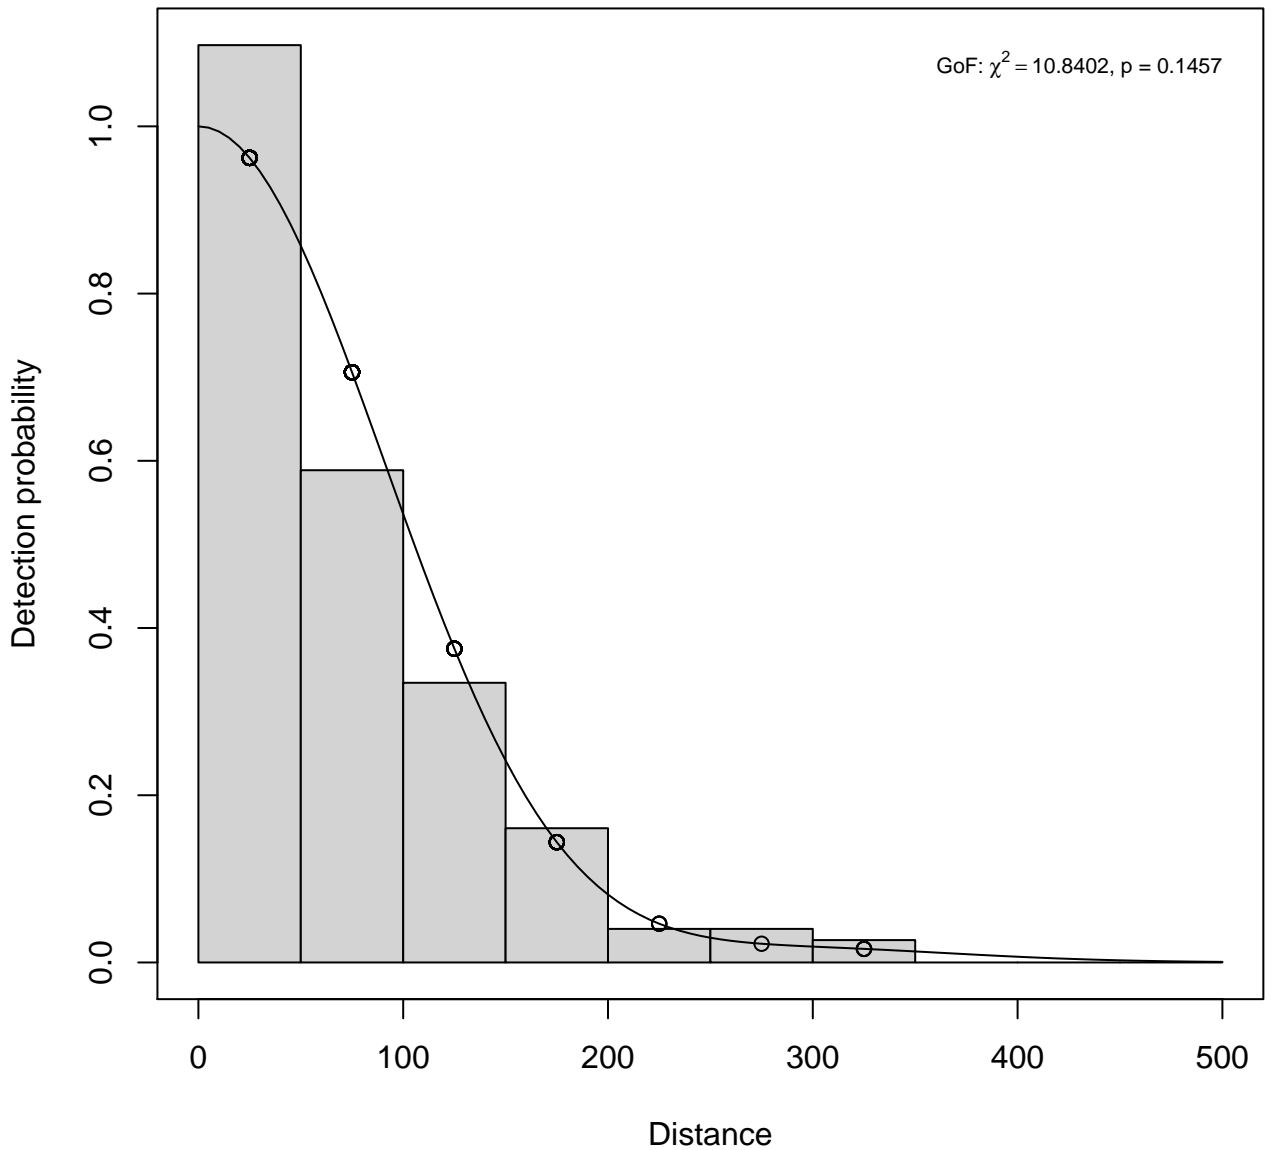

Supplement: s1 [file s1]
