# Supplementary material
Source: MDPI journal article supplement (https://www.mdpi.com/1424-2818/13/7/300)

# Ara ararauna – Cerrado – Brazil

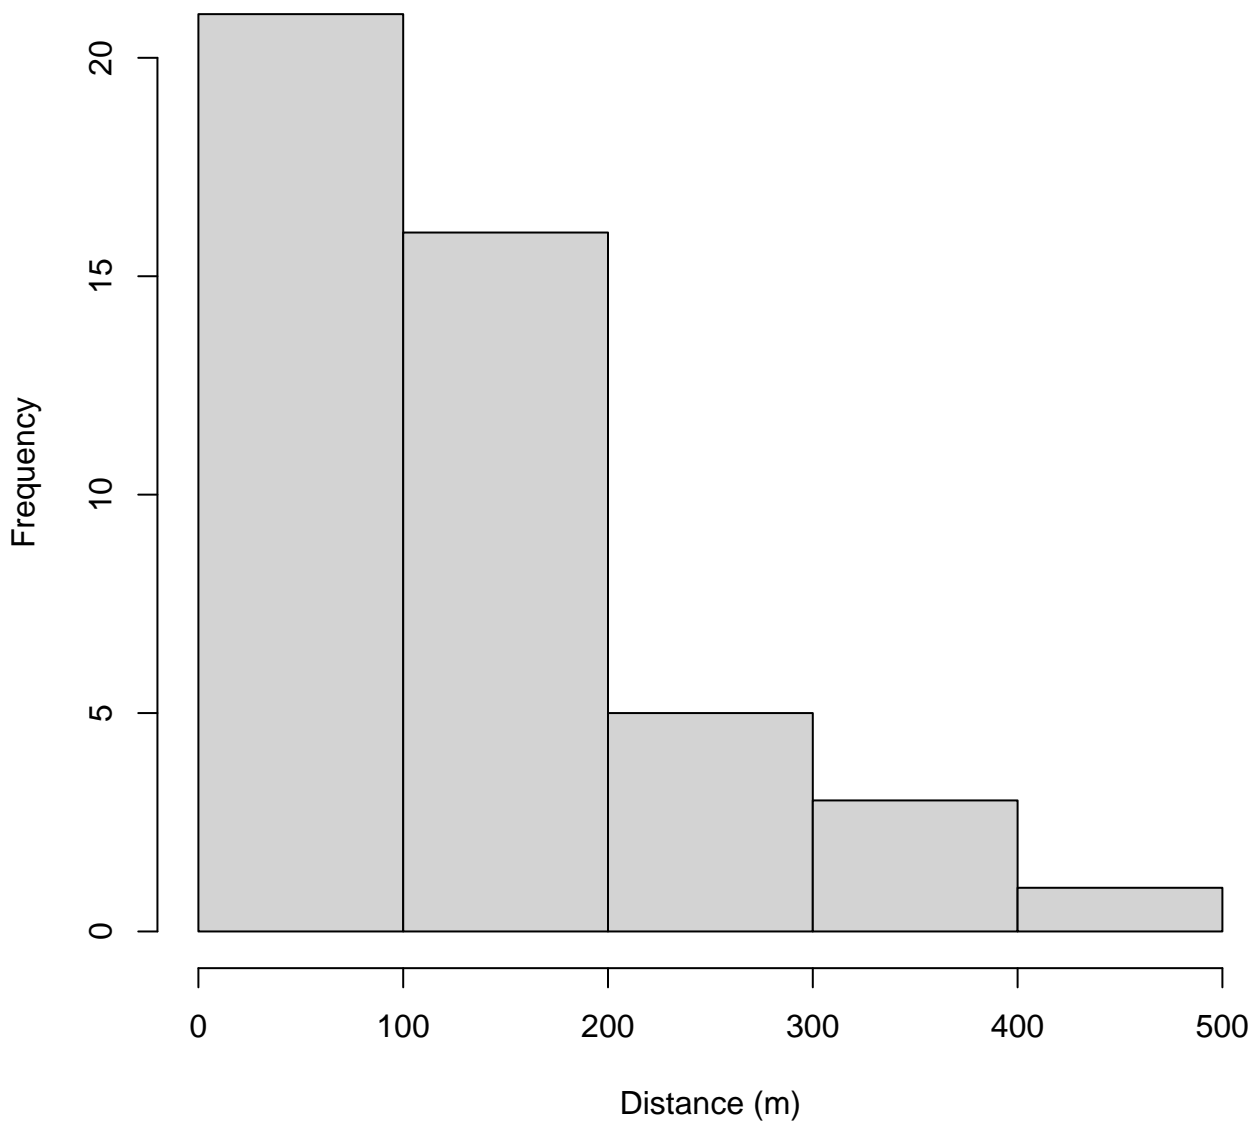

# Ara ararauna – Cerrado – Brazil

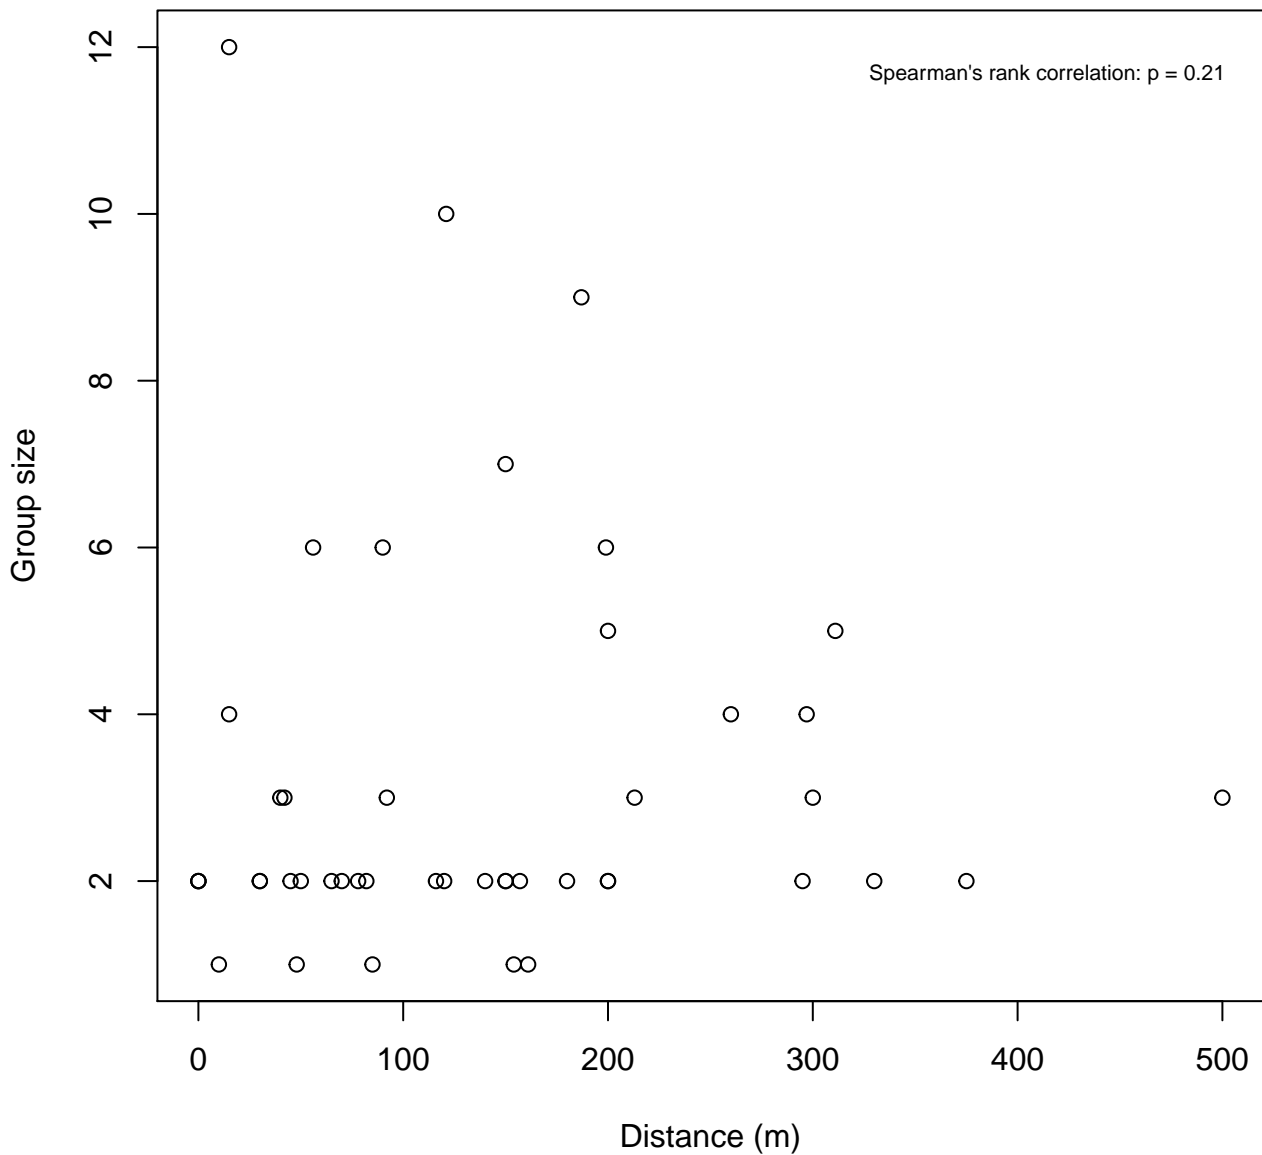

Ara ararauna – Cerrado – Brazil (N = 46, key function = hn)

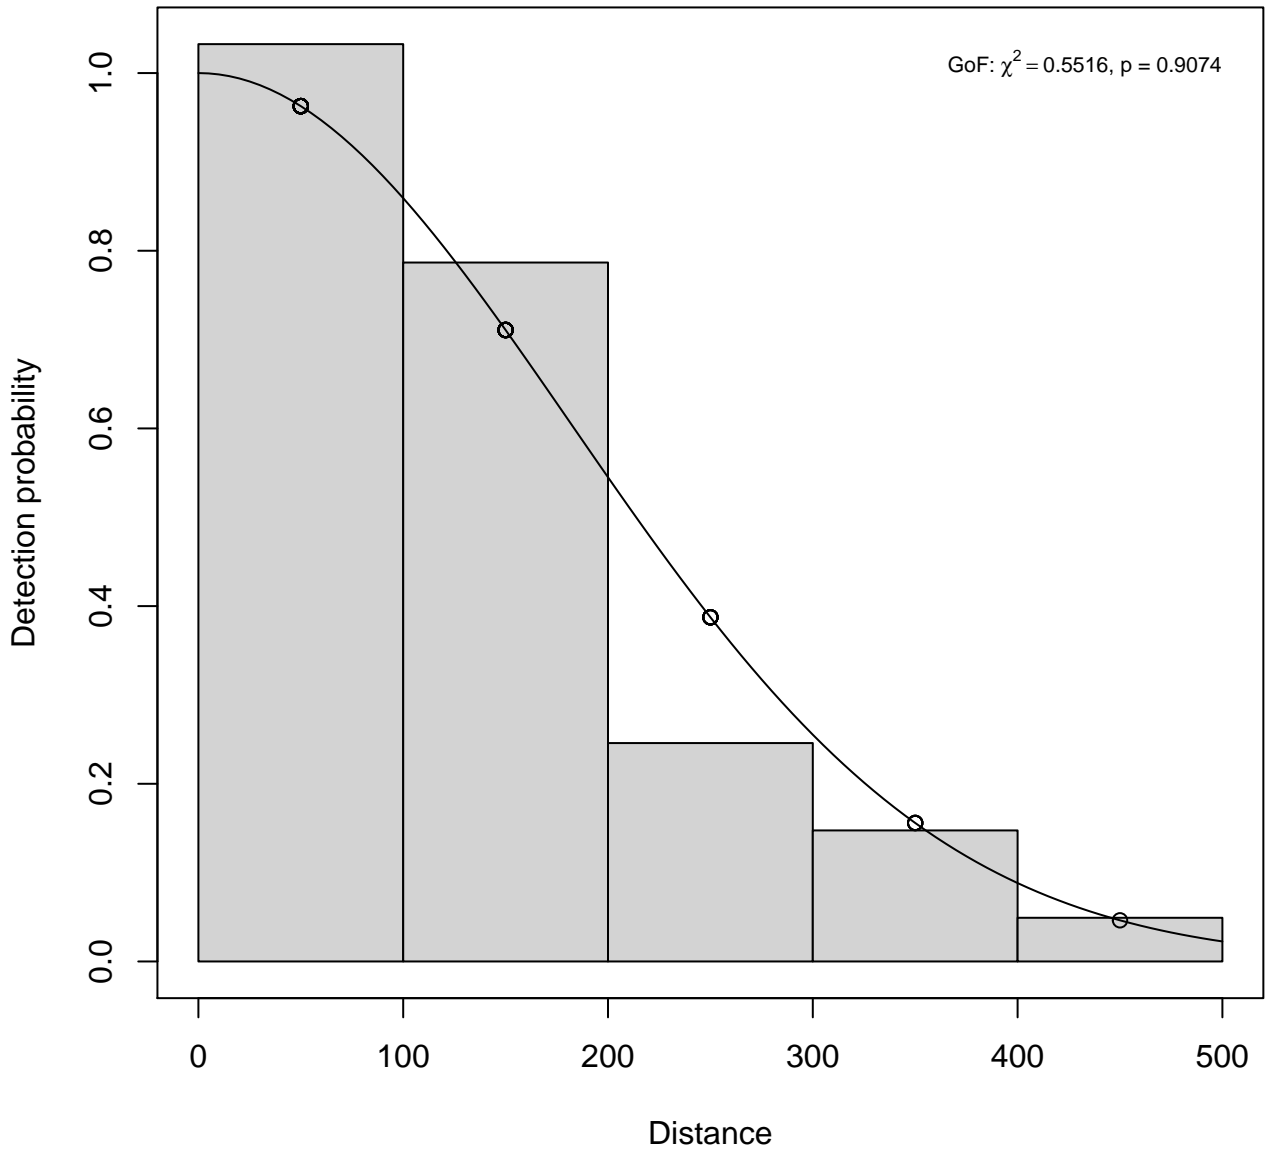

Ara ararauna – Cerrado – Brazil (N = 46, key function = hn)

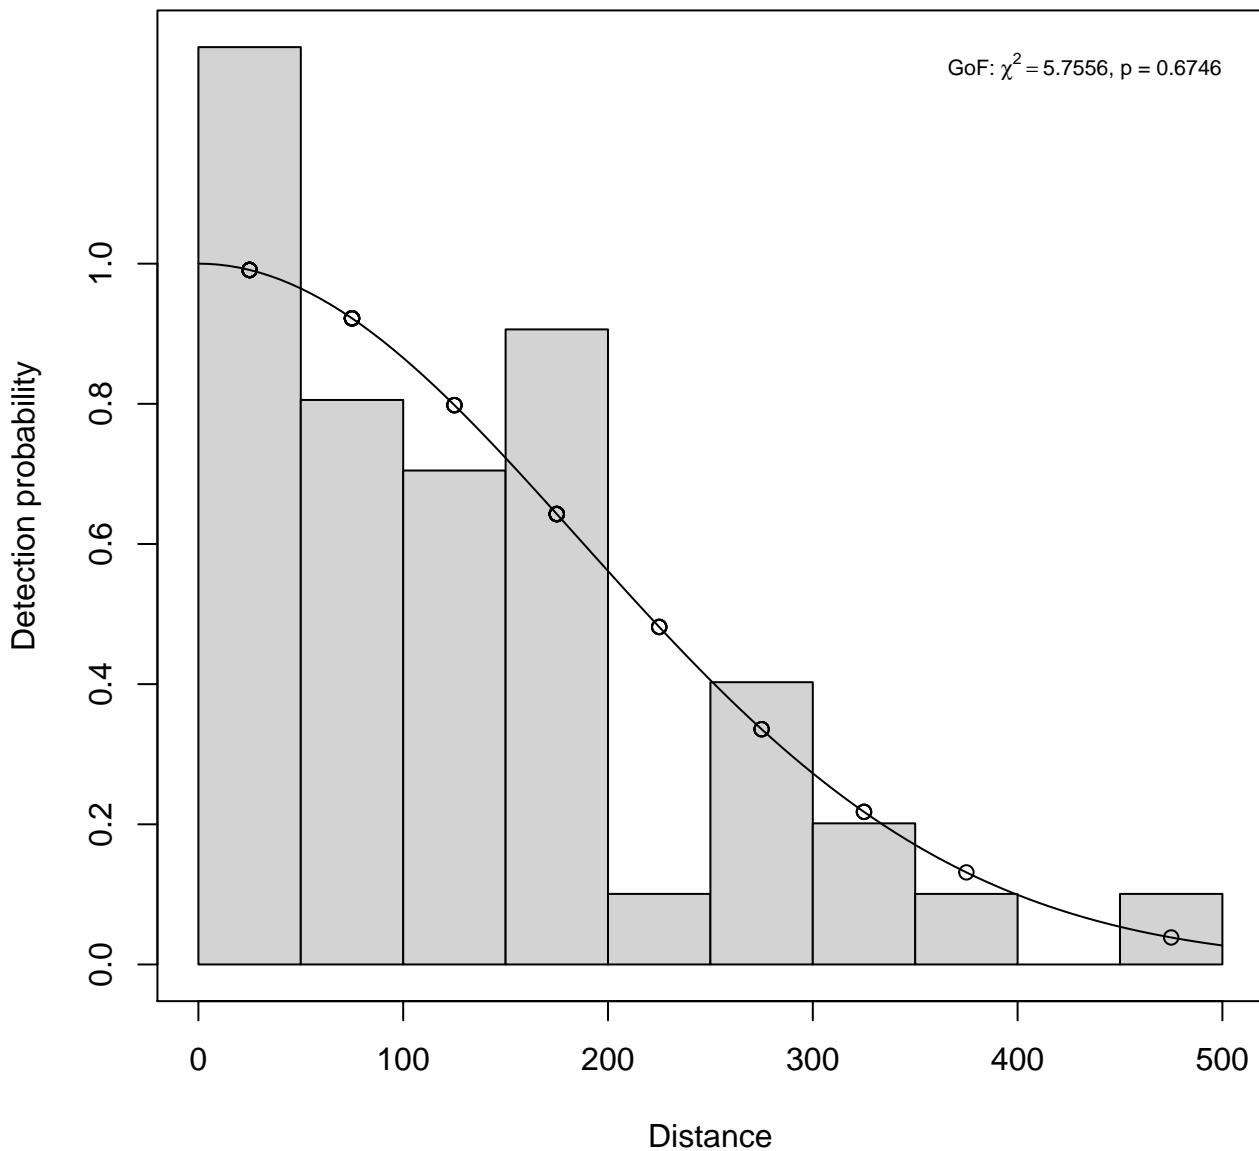

Ara ararauna – Cerrado – Brazil (N = 46, key function = hn)

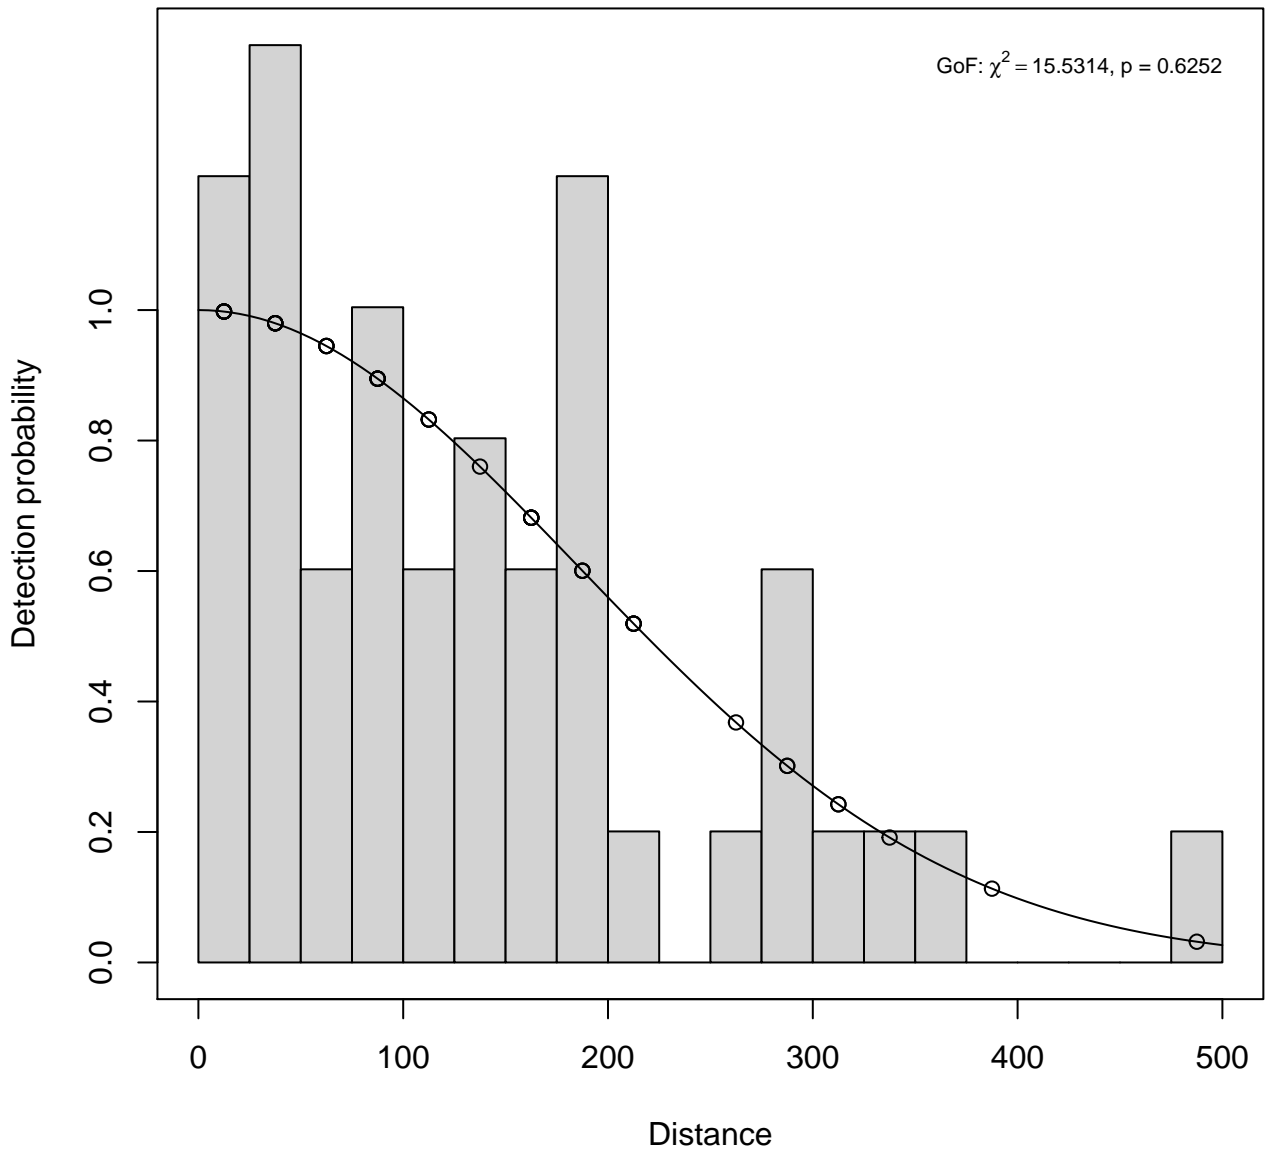

Supplement: s1 [file s1]
