# Supplementary material
Source: MDPI journal article supplement (https://www.mdpi.com/1424-2818/13/7/300)

# Amazona vinacea – Araucaria moist forests – Brazil

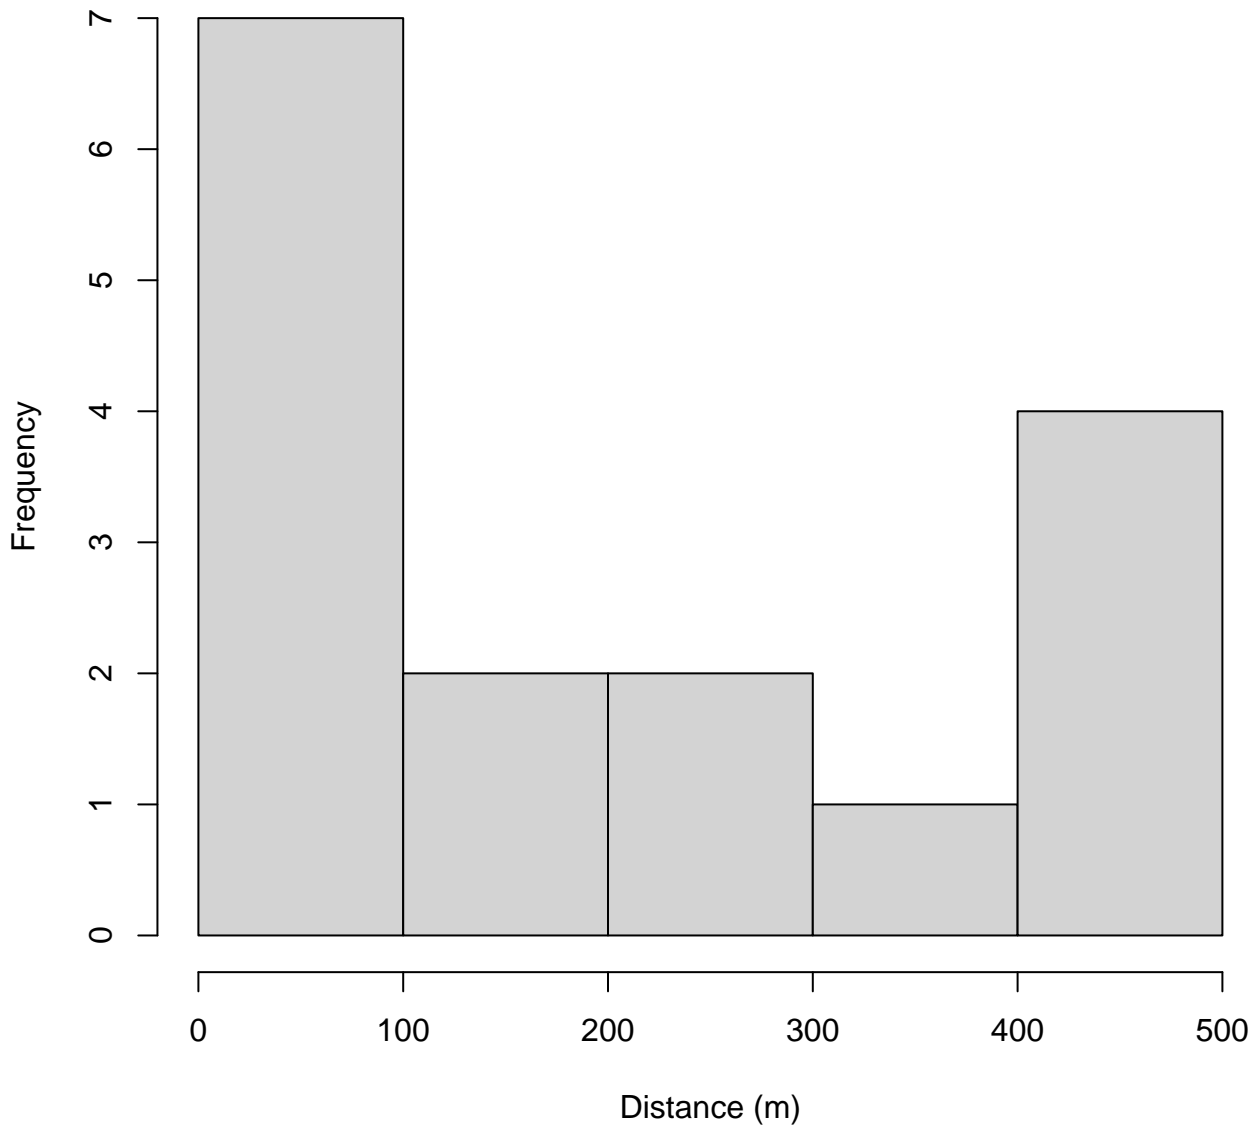

# Amazona vinacea – Araucaria moist forests – Brazil

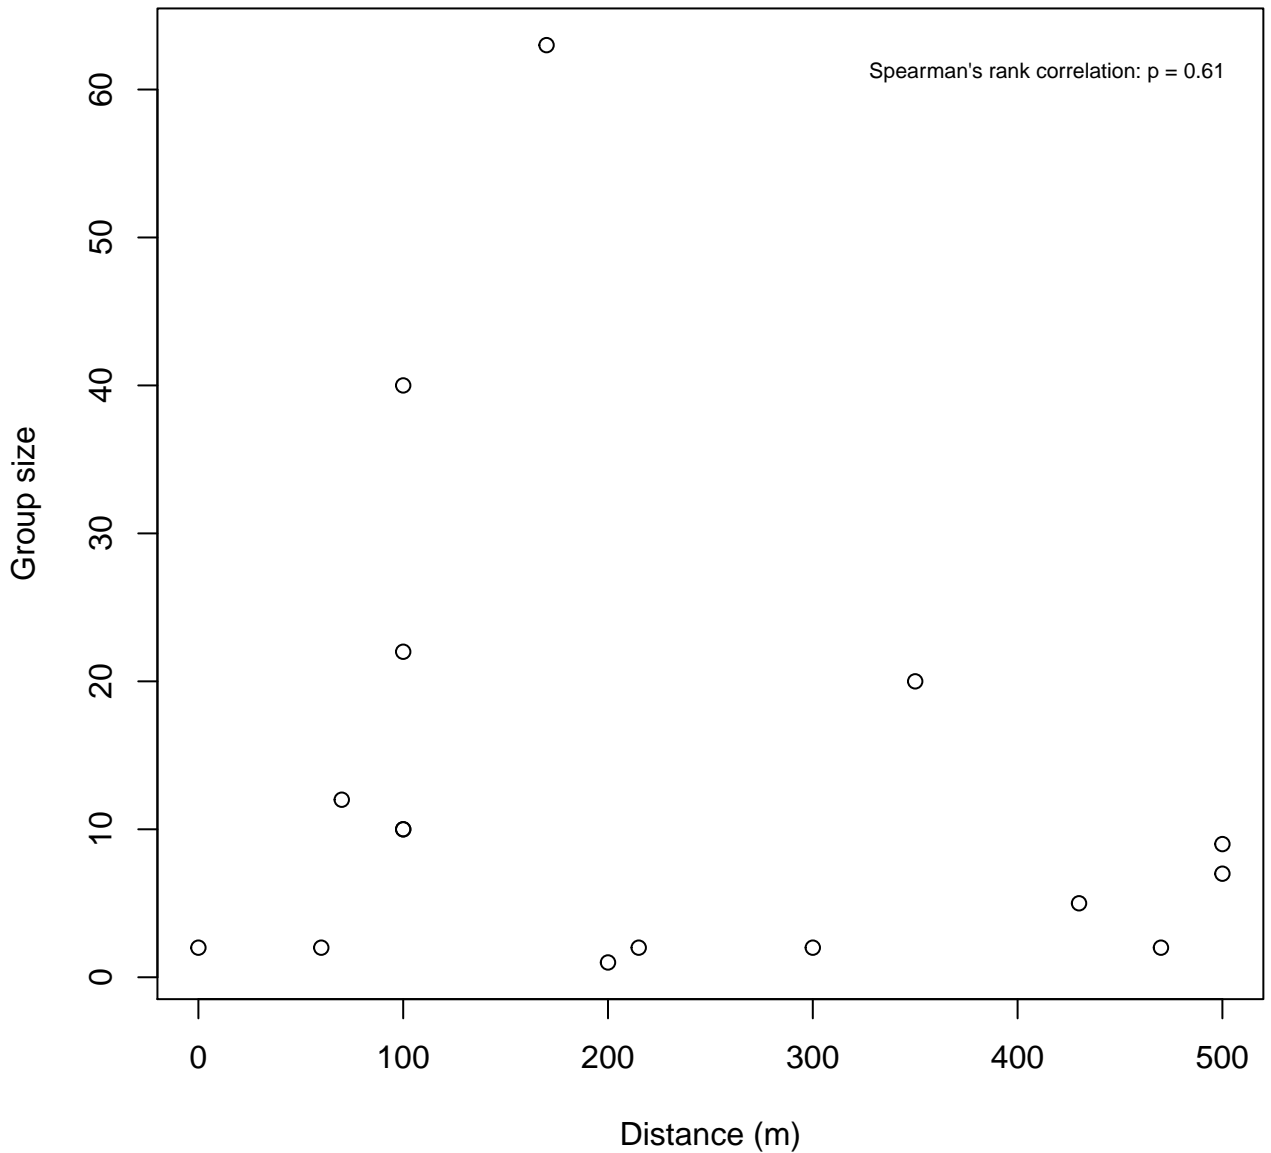

Amazona vinacea – Araucaria moist forests – Brazil (N = 16, key function = unif)

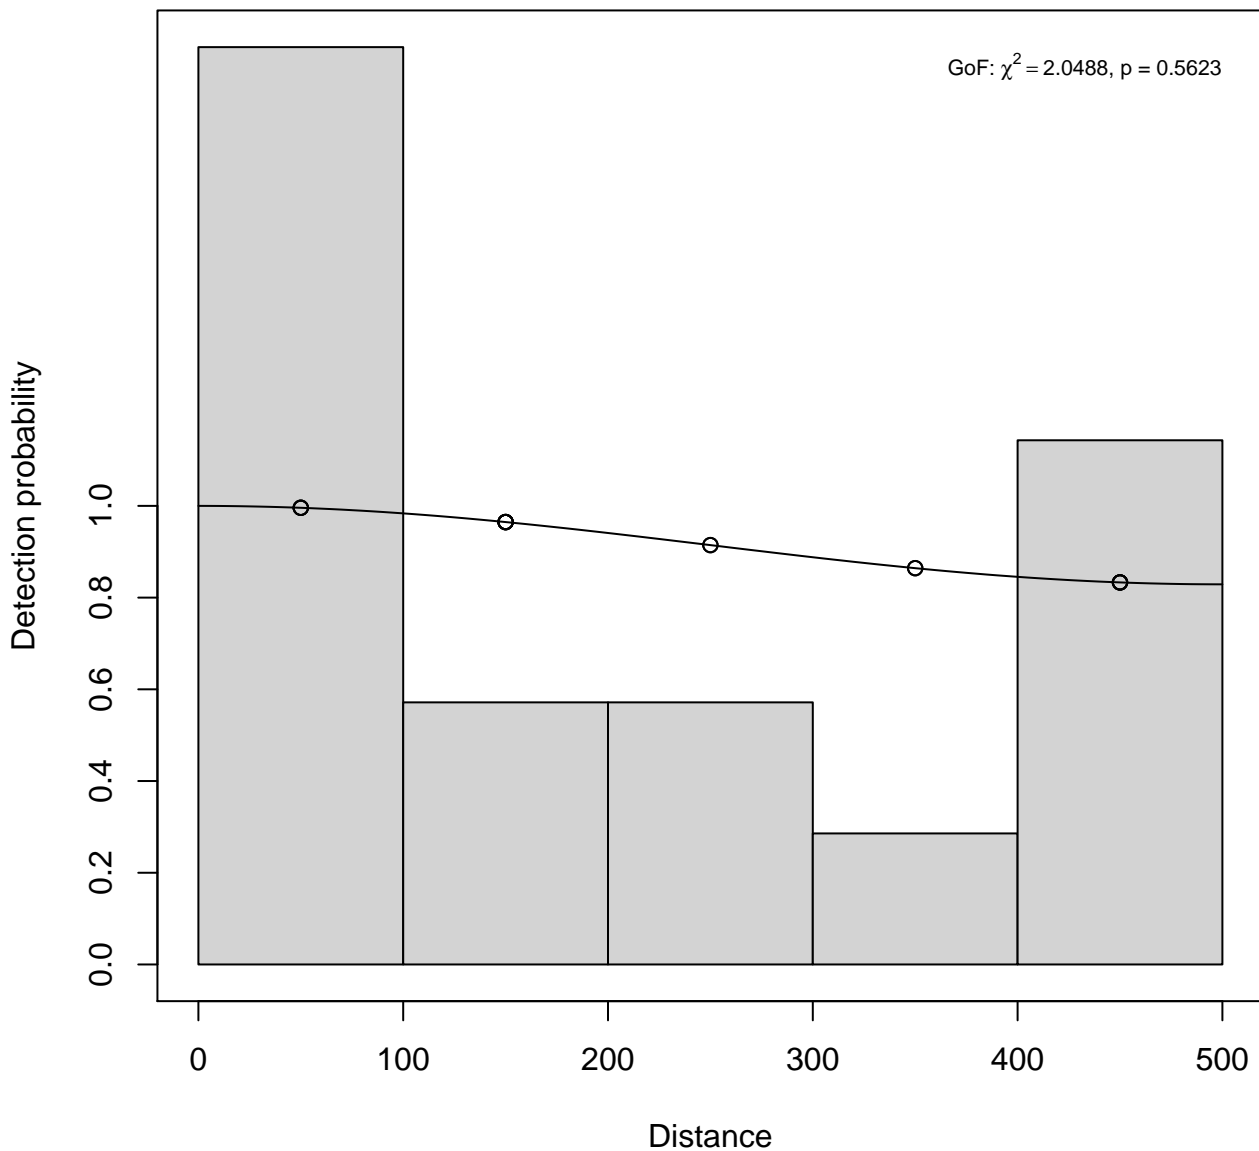

Amazona vinacea – Araucaria moist forests – Brazil (N = 16, key function = unif)

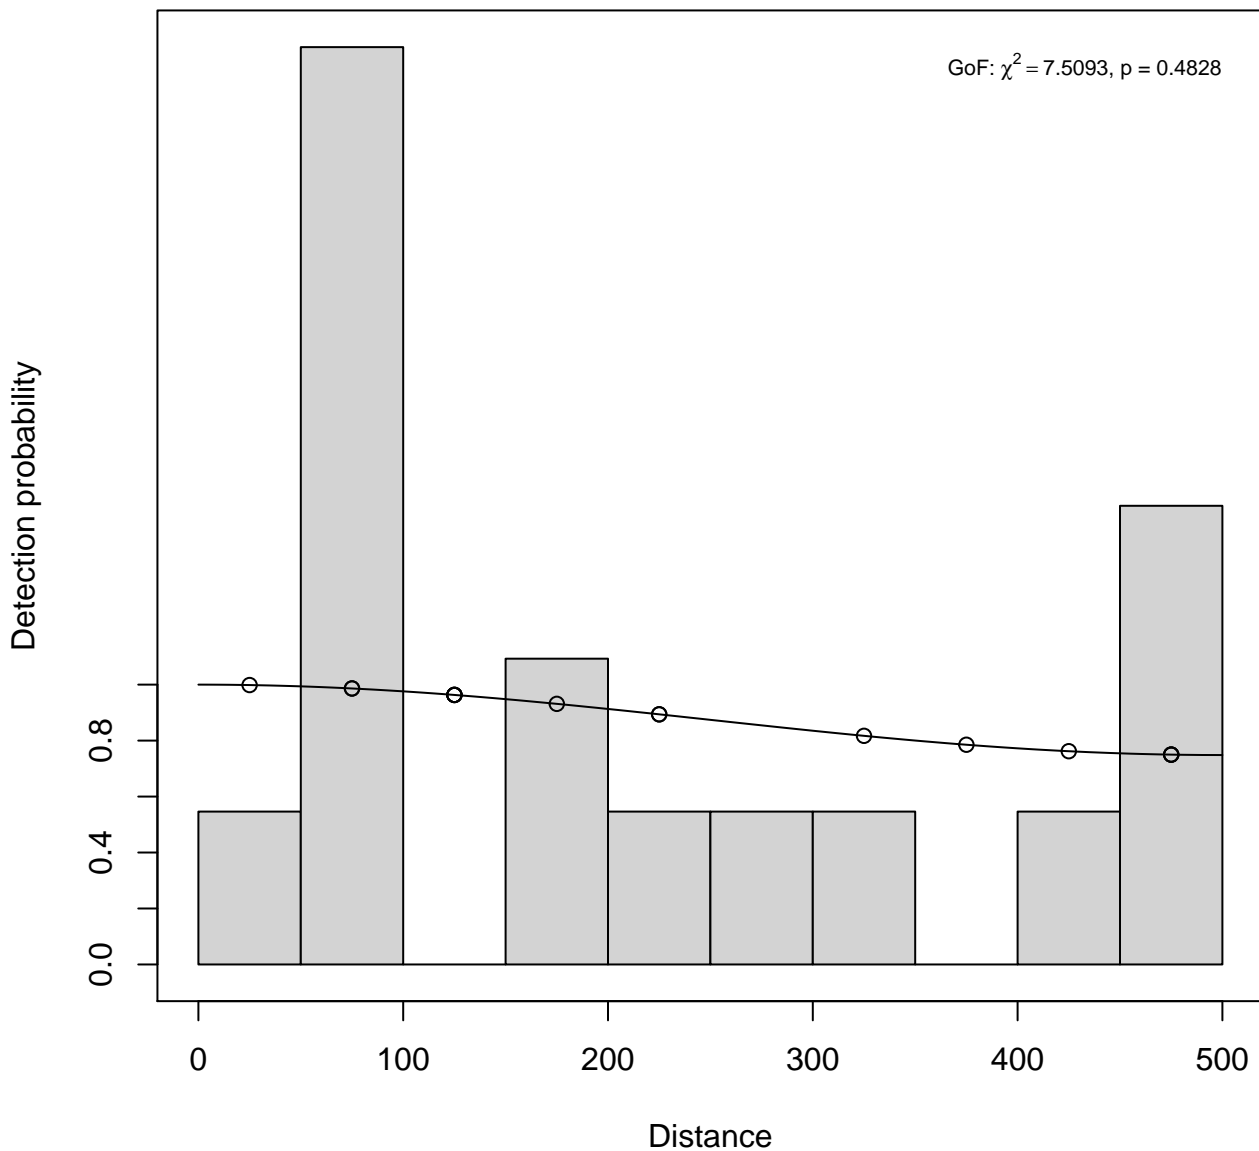

Amazona vinacea – Araucaria moist forests – Brazil (N = 16, key function = unif)

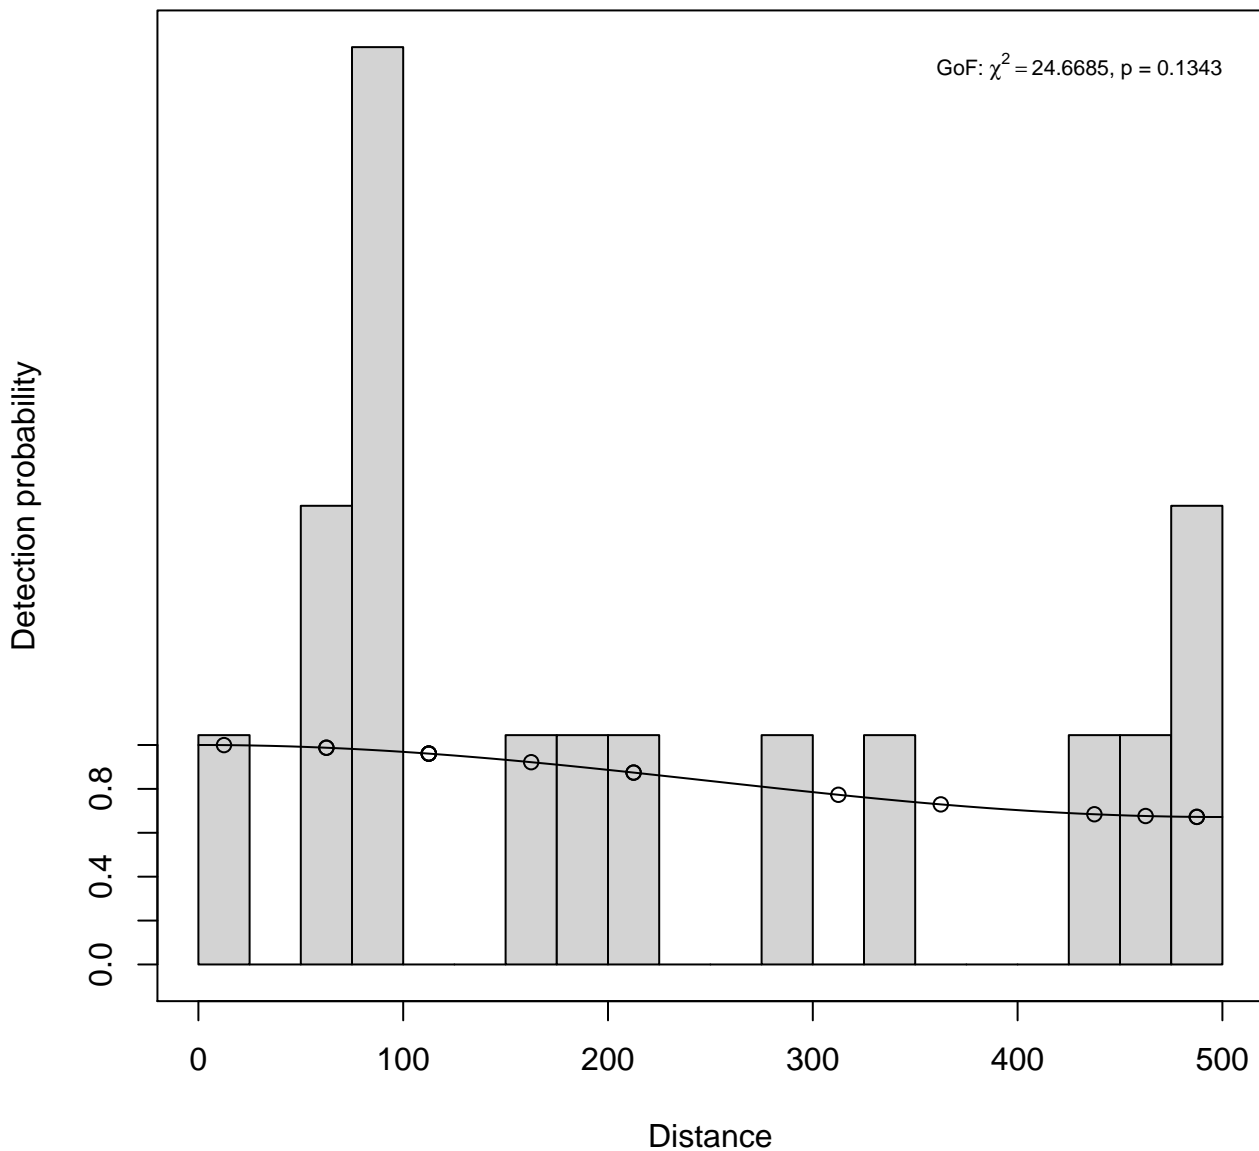

Supplement: s1 [file s1]
