# Supplementary material
Source: MDPI journal article supplement (https://www.mdpi.com/1424-2818/13/7/300)

# Enicognathus ferrugineus – Valdivian temperate forests – Chile

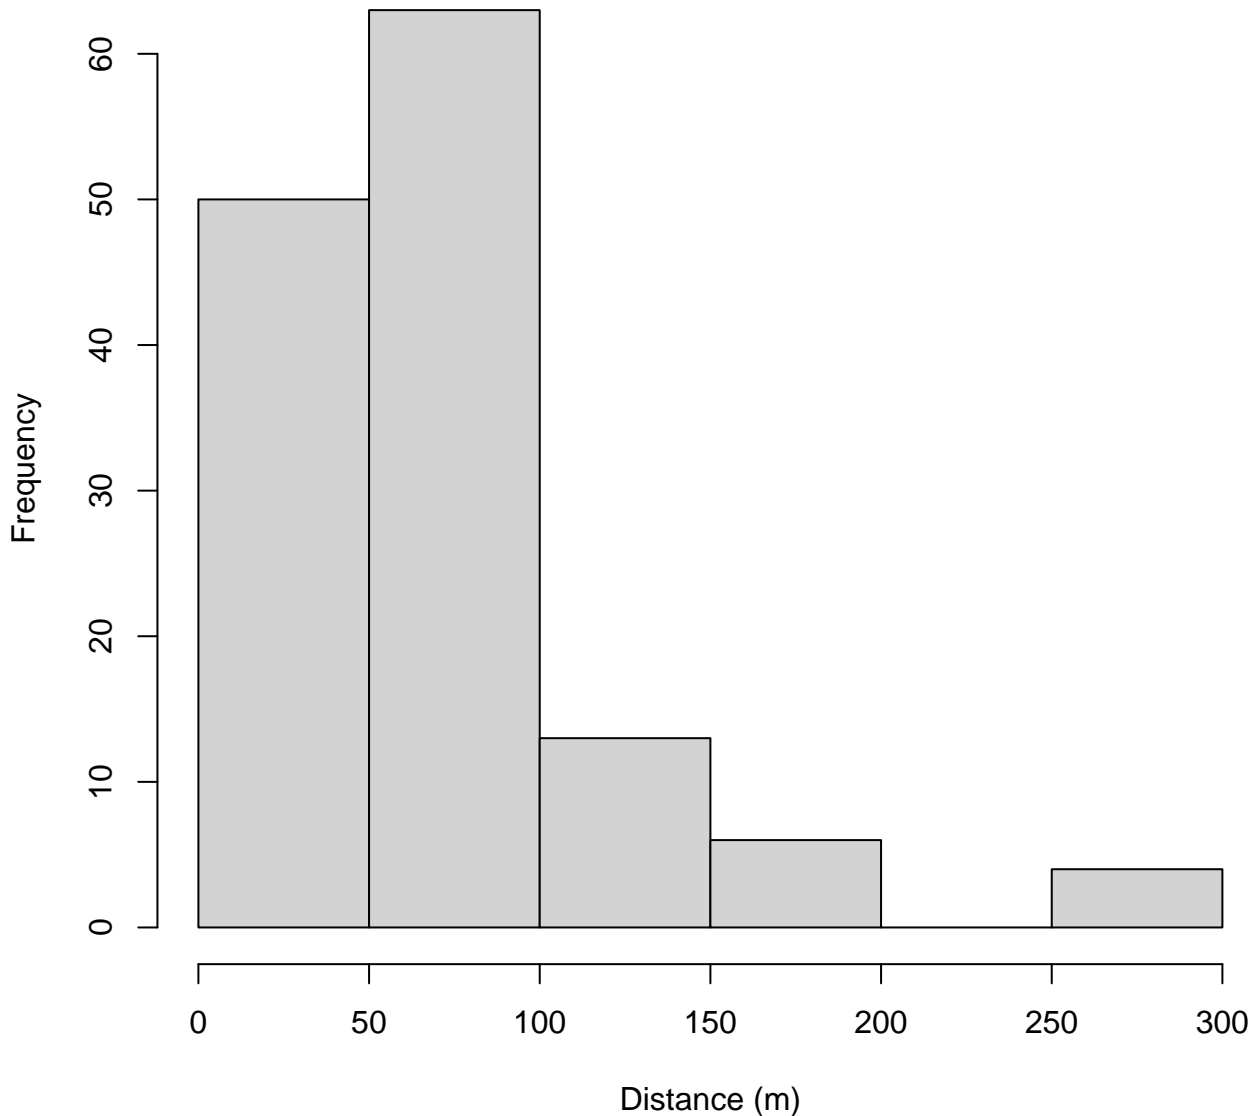

# Enicognathus ferrugineus – Valdivian temperate forests – Chile

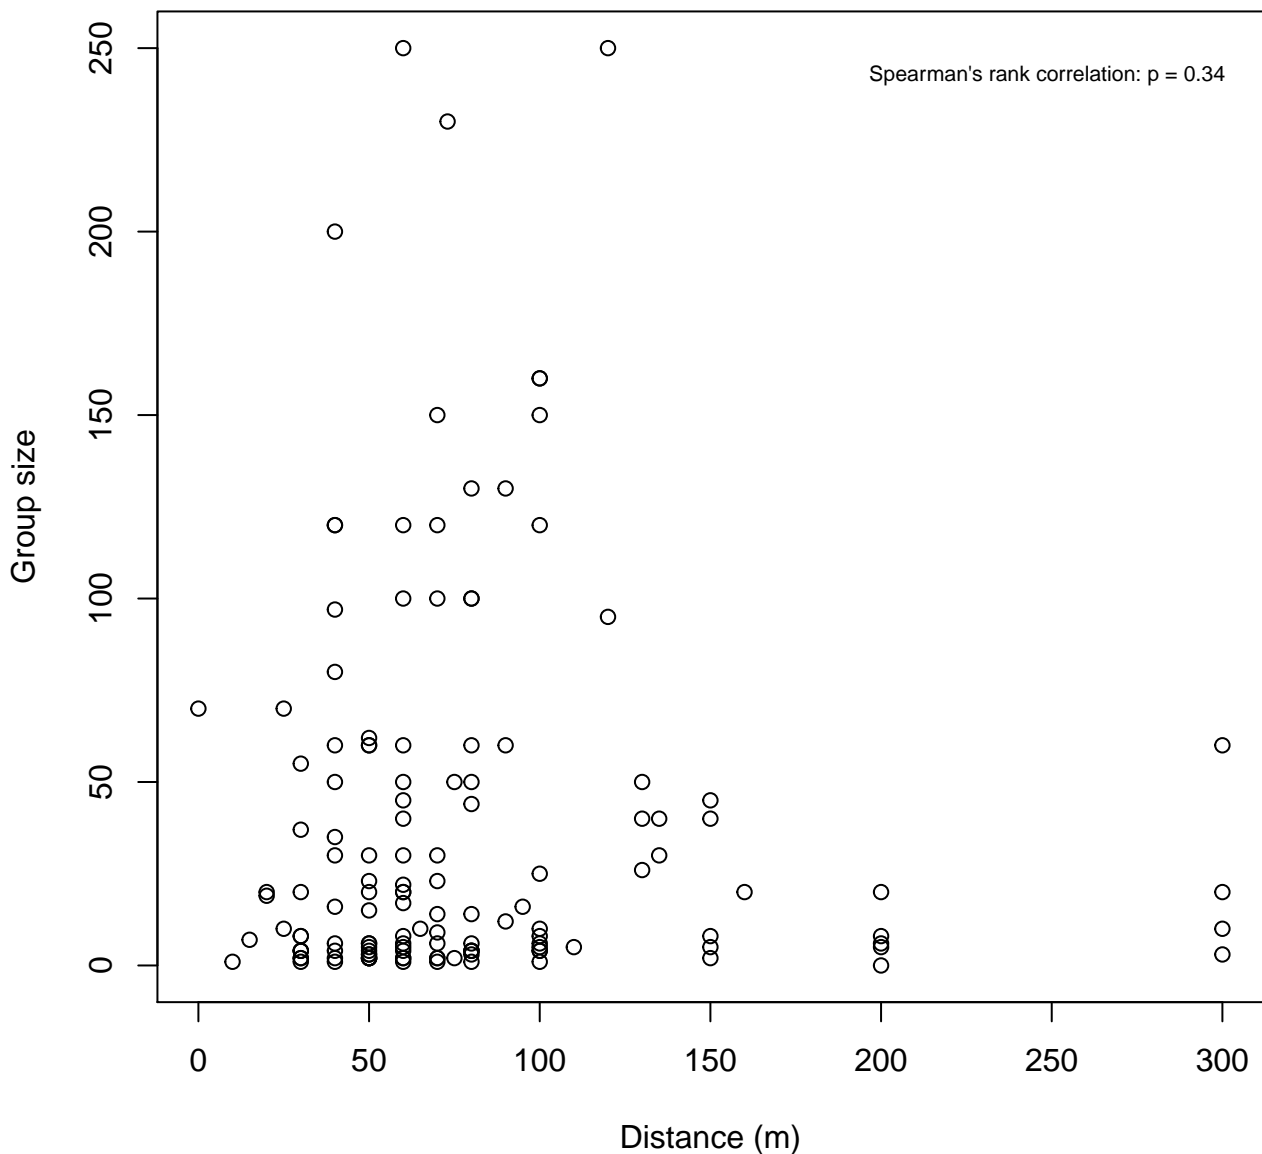

Enicognathus ferrugineus – Valdivian temperate forests – Chile (N = 136, key function = hr)

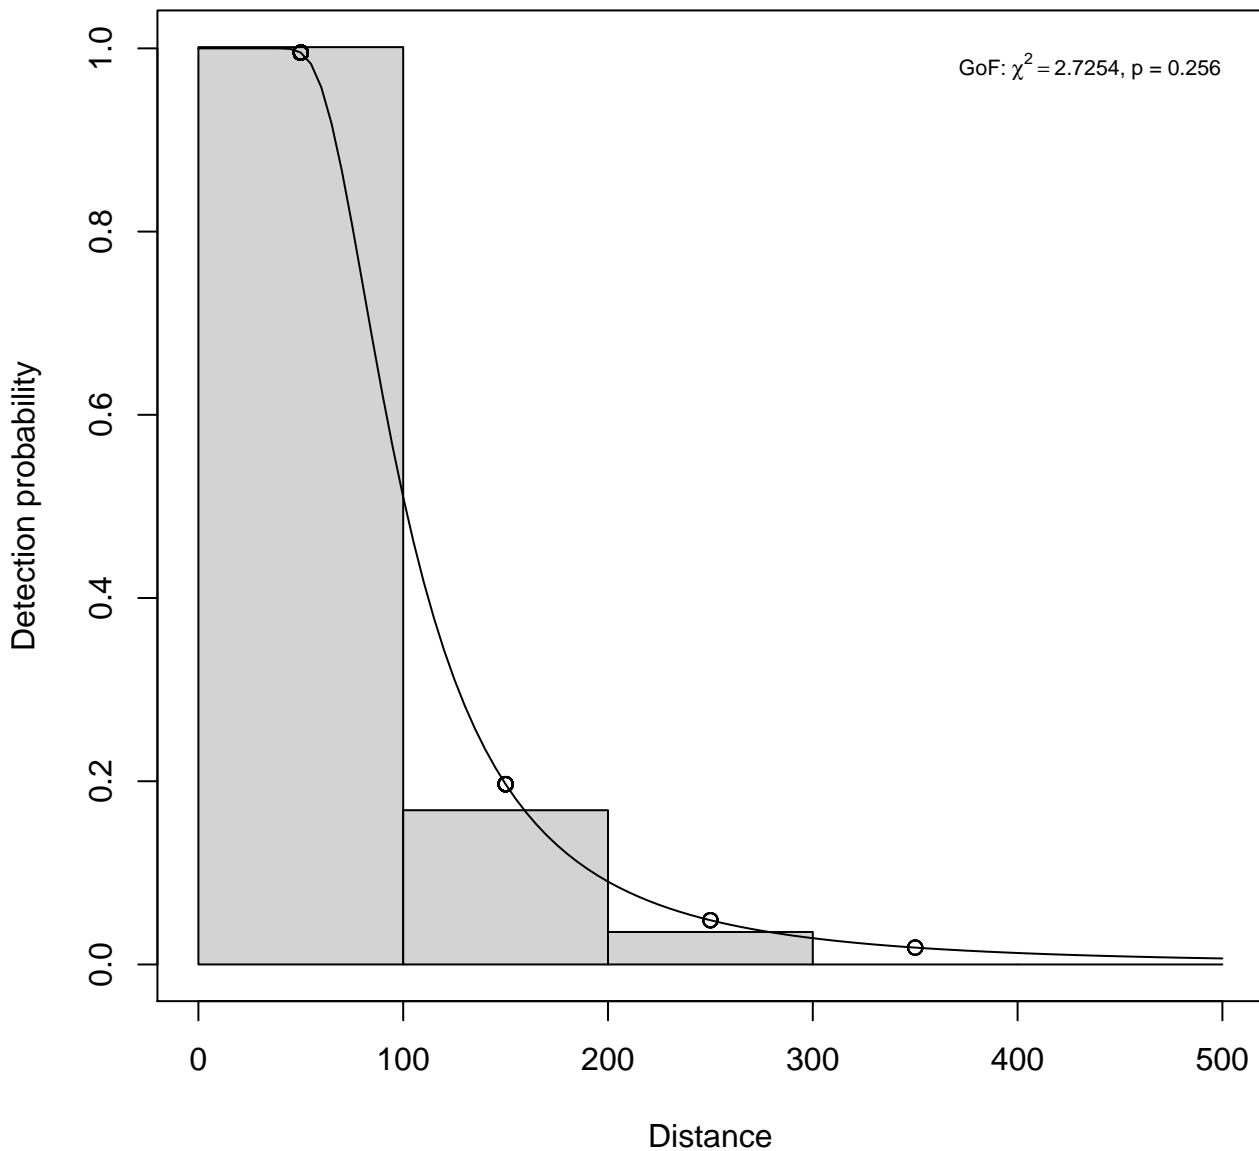

Enicognathus ferrugineus – Valdivian temperate forests – Chile (N = 136, key function = hr)

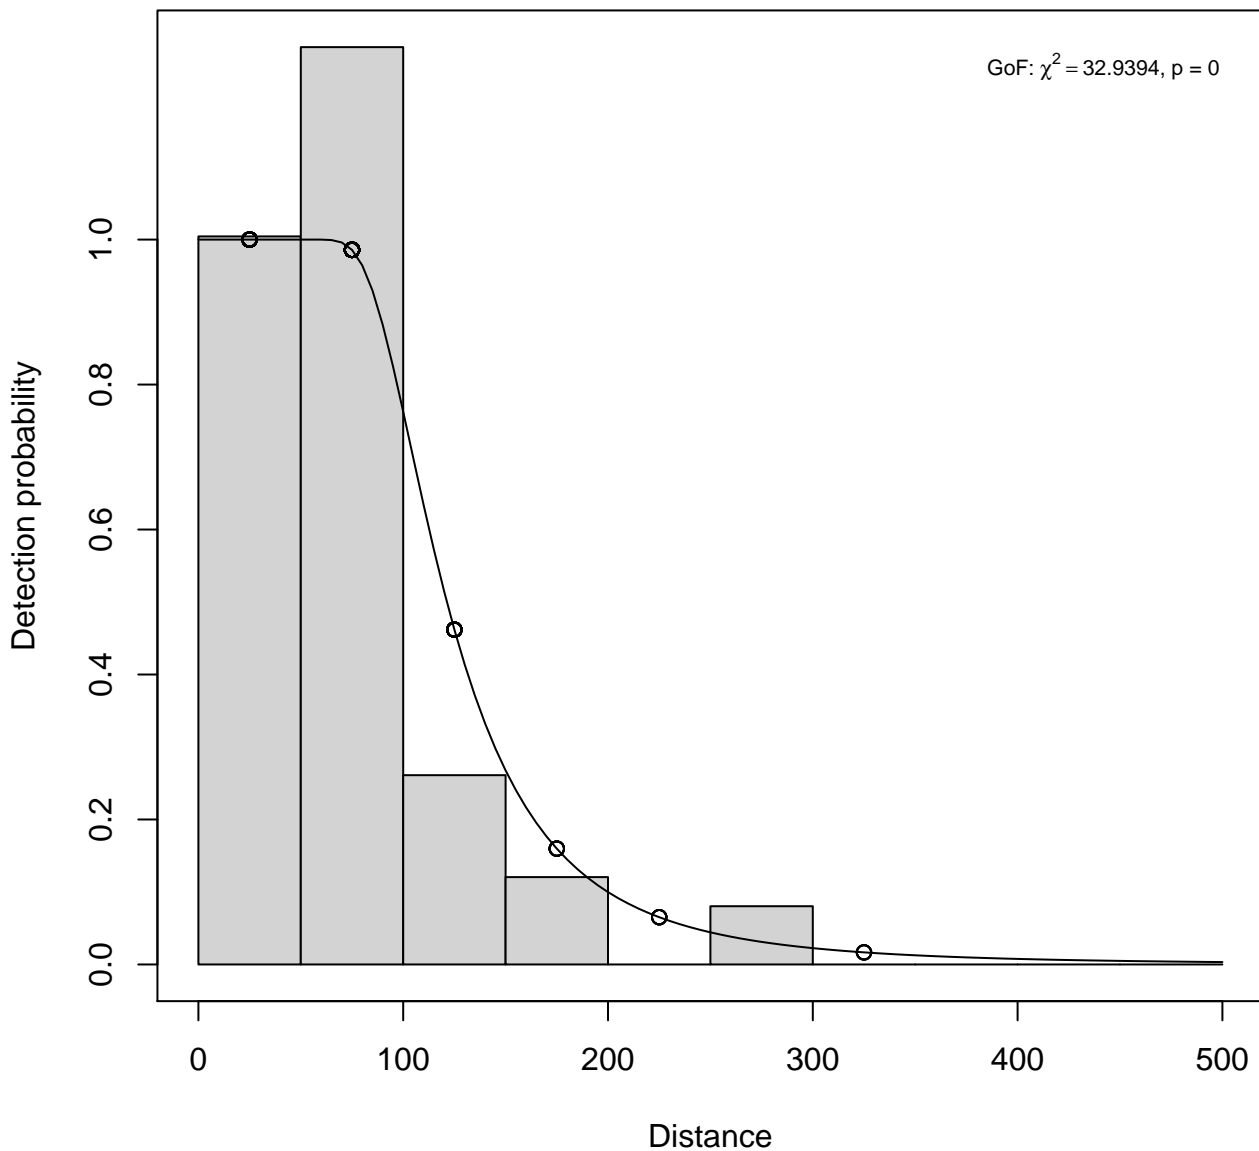

Enicognathus ferrugineus – Valdivian temperate forests – Chile (N = 136, key function = hr)

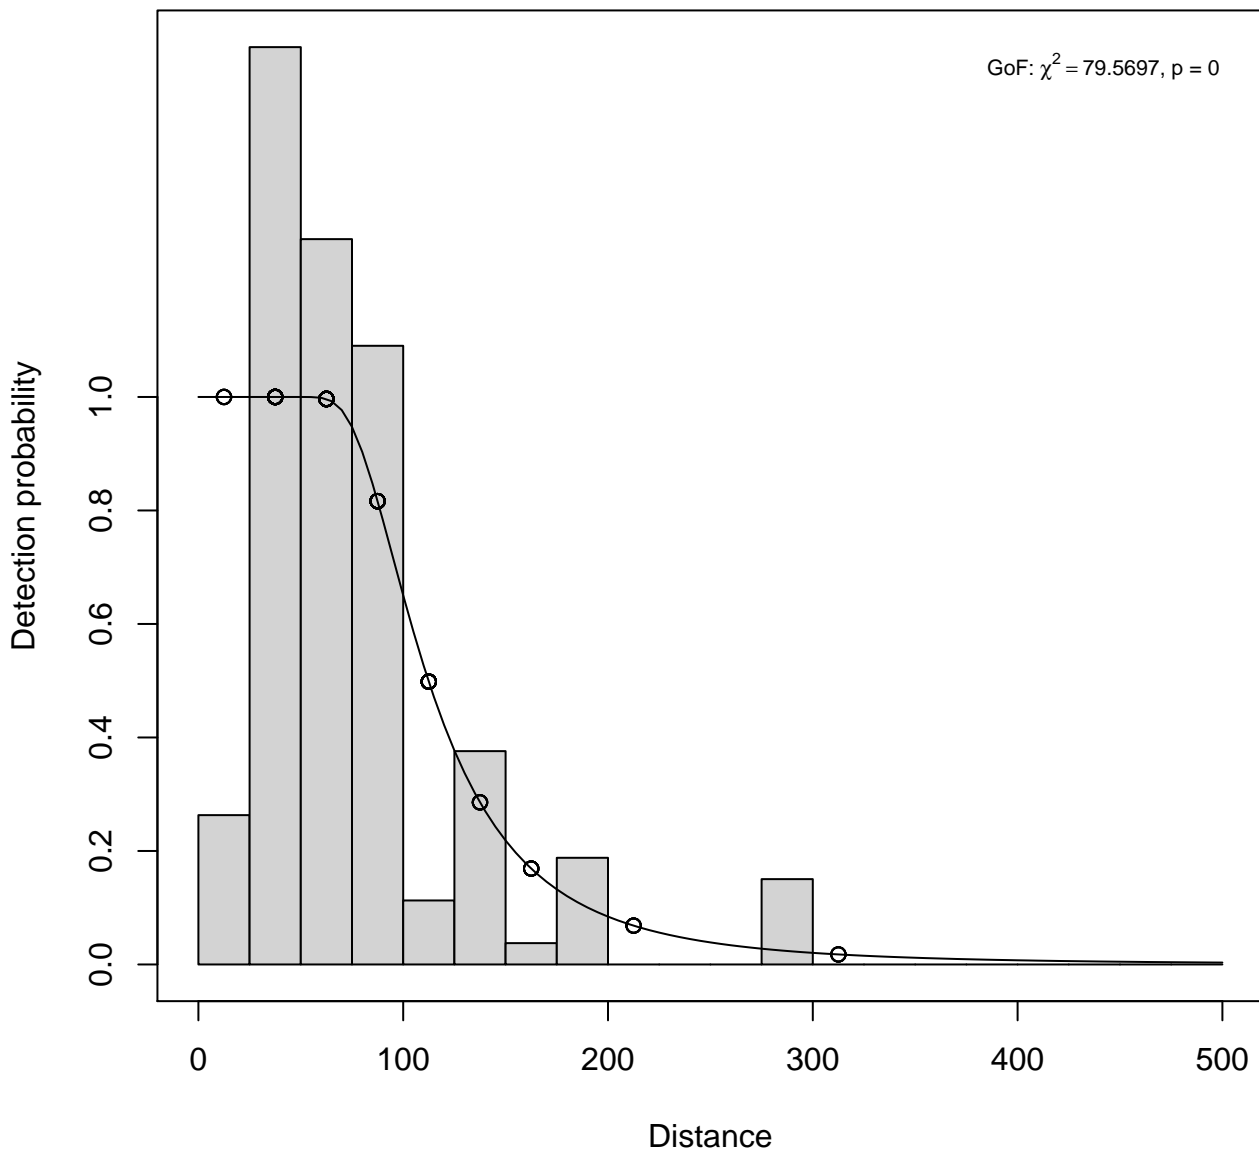

Supplement: s1 [file s1]
