# Supplementary material
Source: MDPI journal article supplement (https://www.mdpi.com/1424-2818/13/7/300)

**Psittacula eupatria – Sri Lanka dry-zone dry evergreen forests – Sri Lanka**

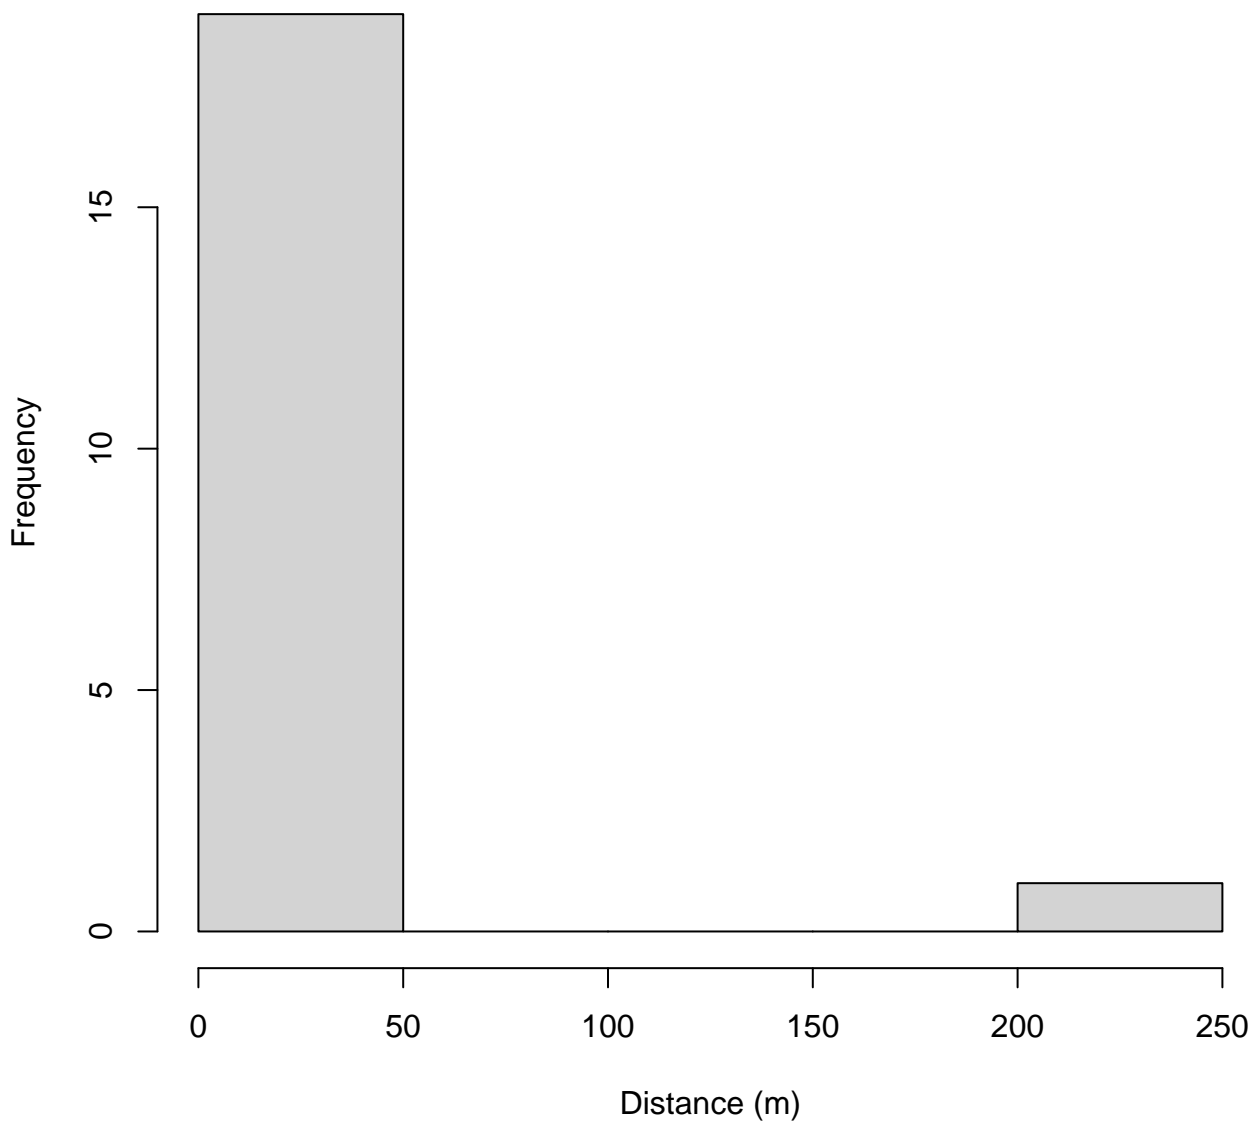

# Psittacula eupatria – Sri Lanka dry-zone dry evergreen forests – Sri Lanka

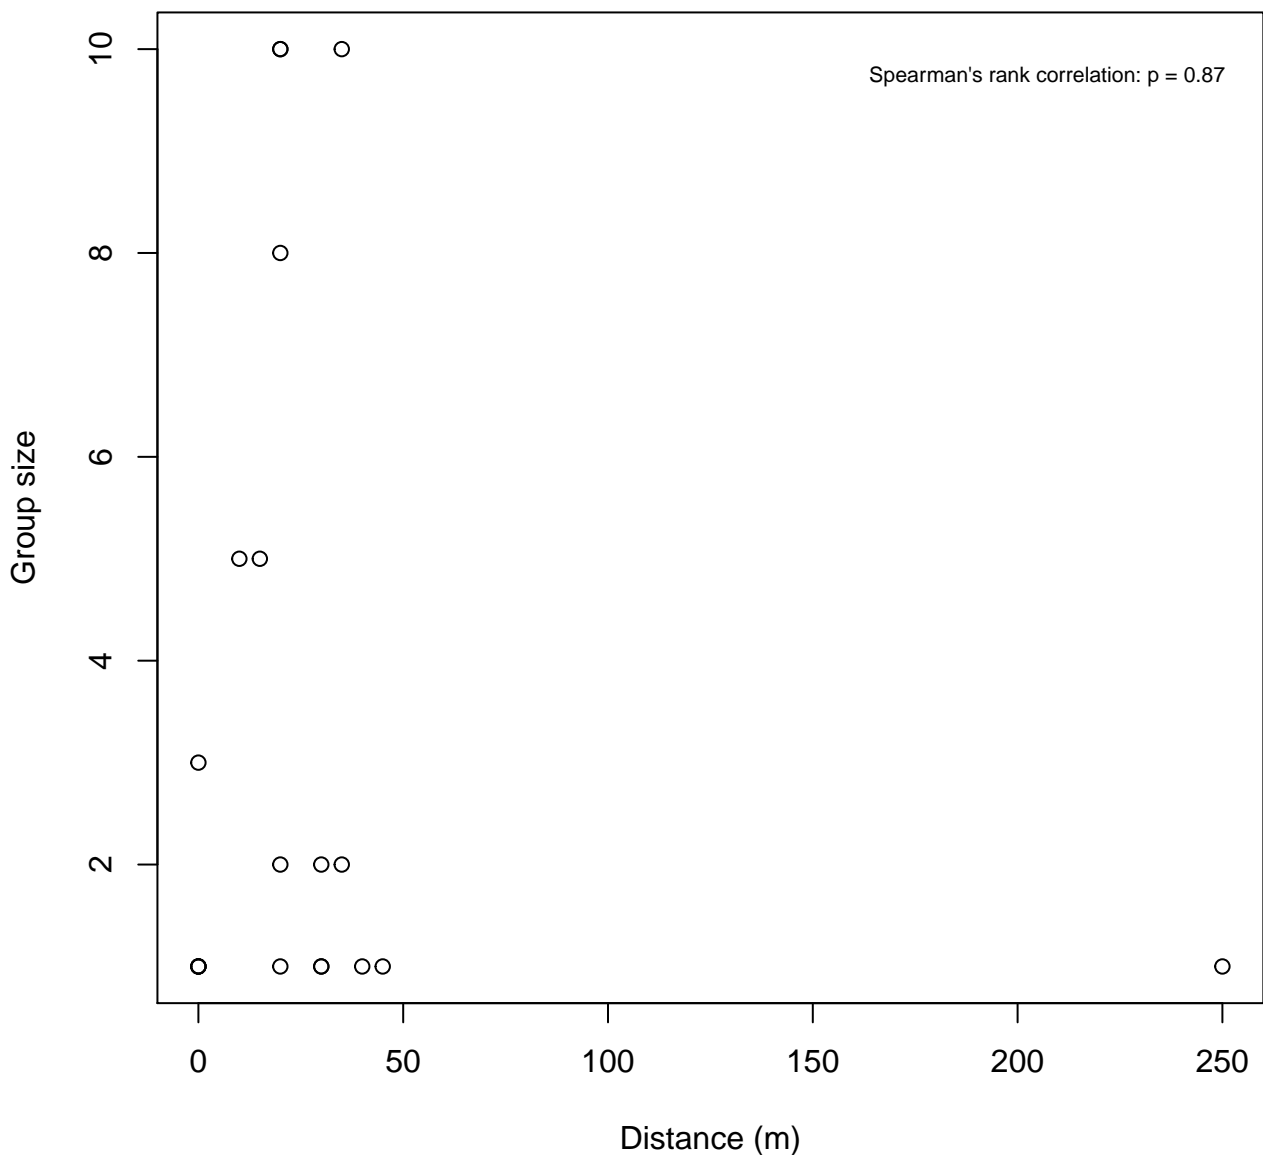

*Psittacula eupatria* – Sri Lanka dry-zone dry evergreen forests – Sri Lanka (N = 20, key function = hr)

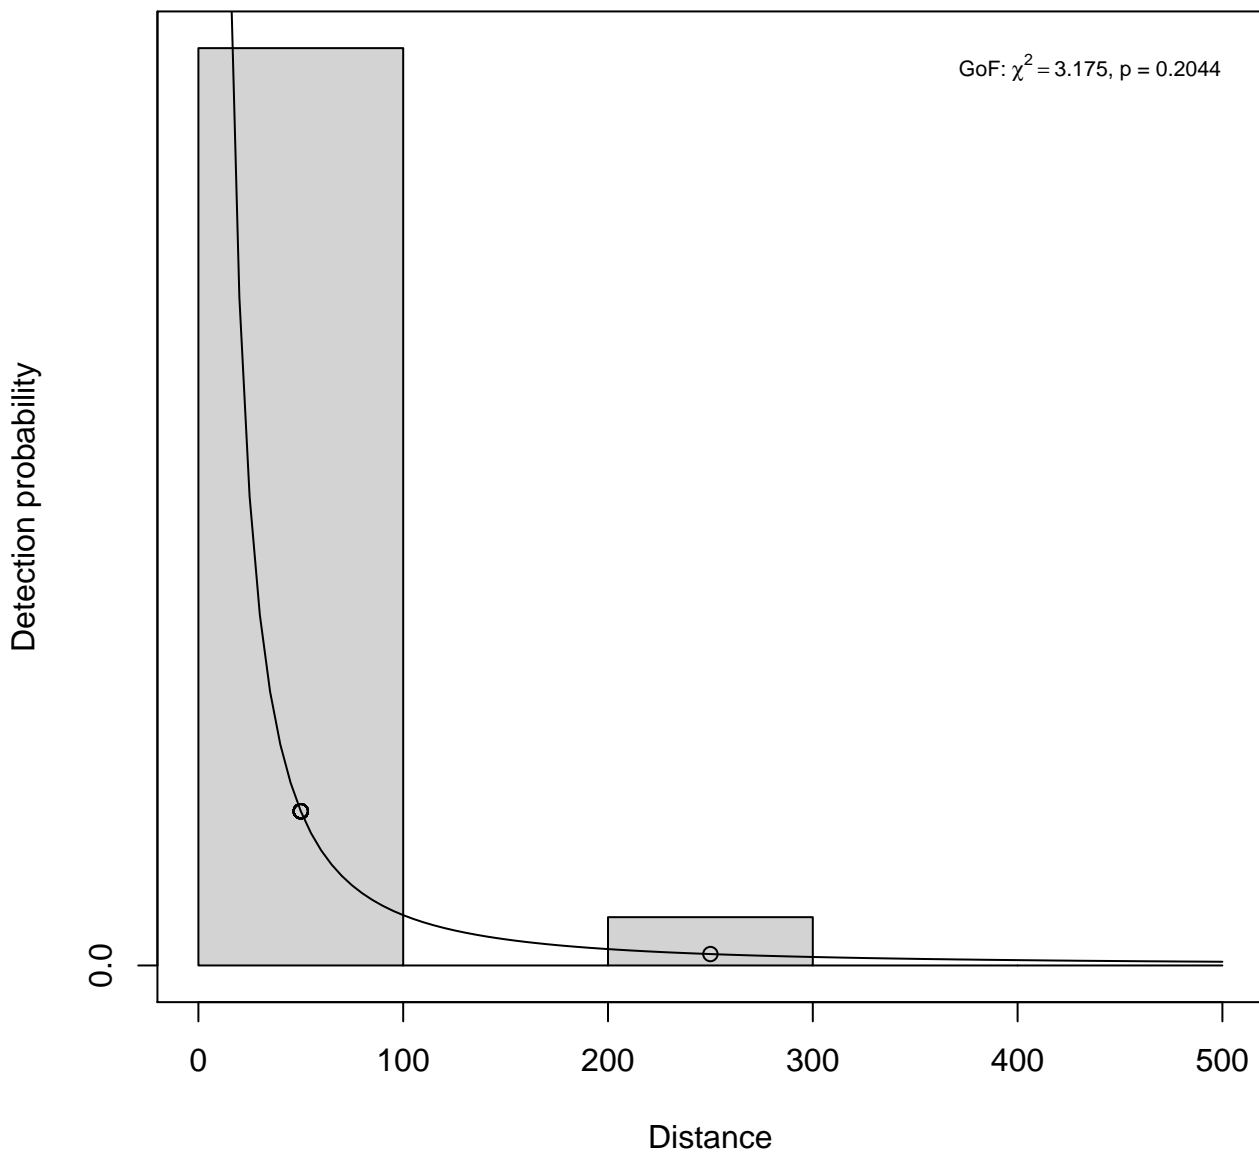

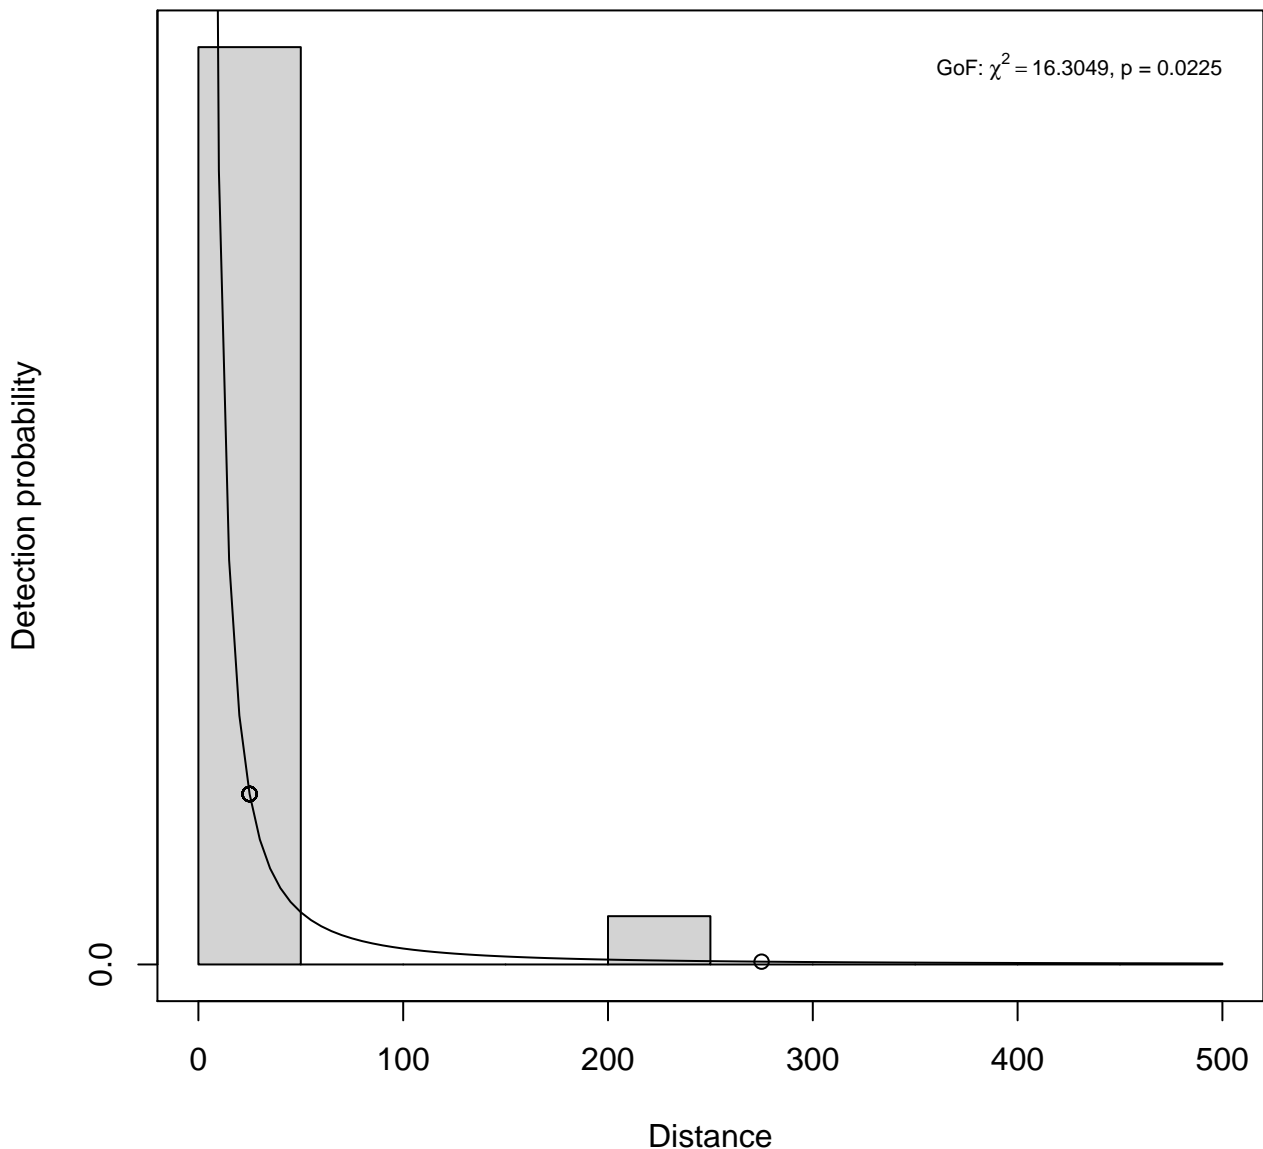

Psittacula eupatria – Sri Lanka dry-zone dry evergreen forests – Sri Lanka (N = 20, key function = hr)

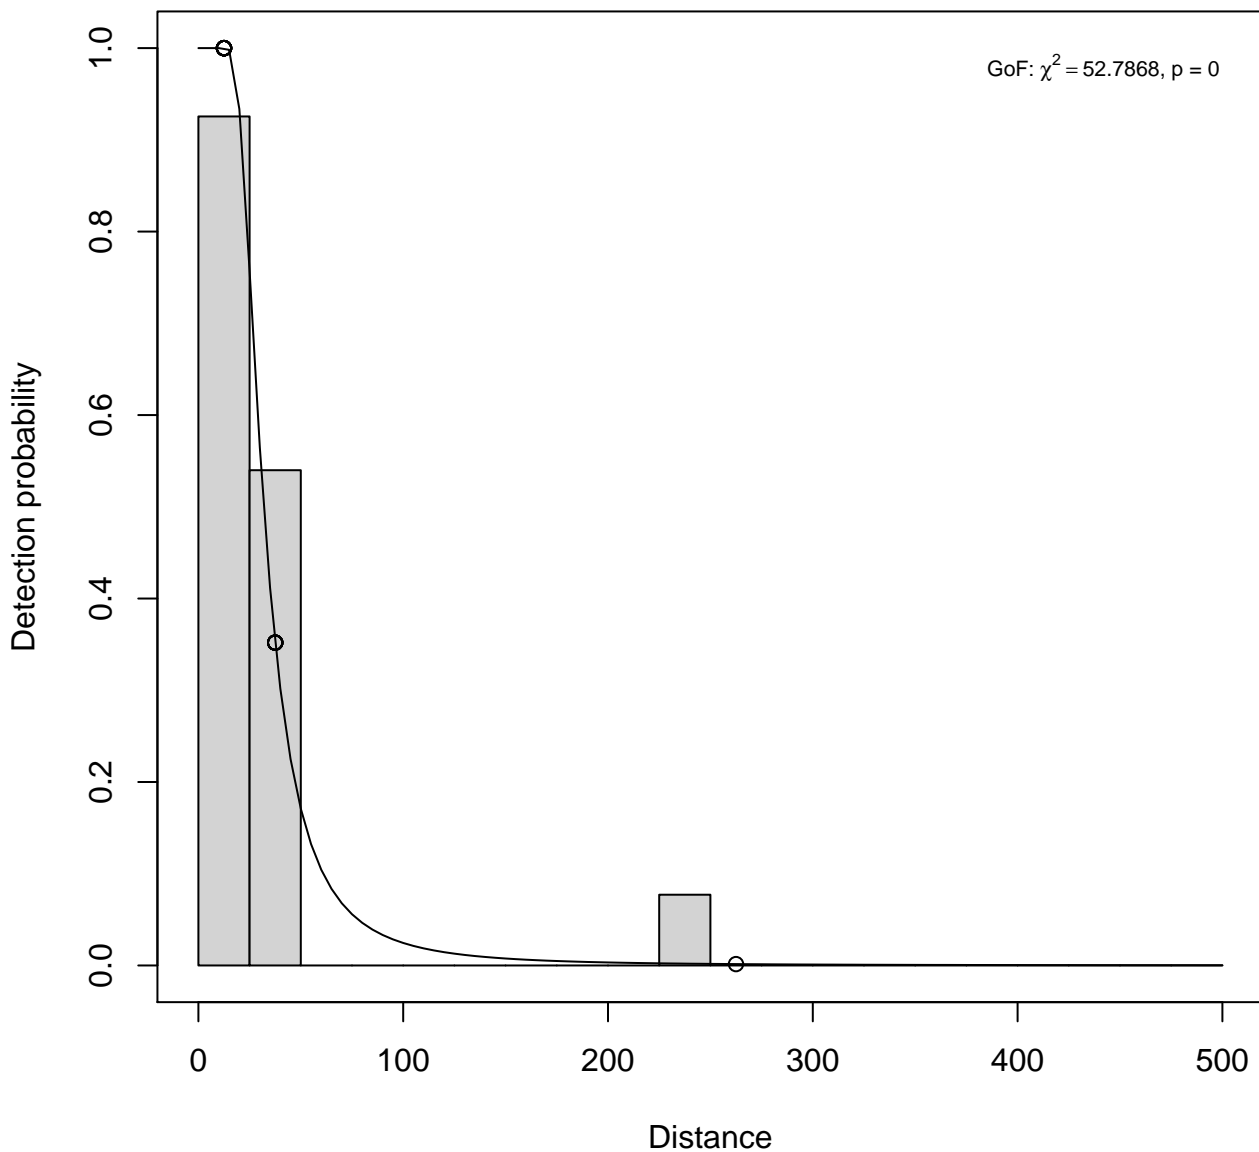

Supplement: s1 [file s1]
