# Supplementary material
Source: MDPI journal article supplement (https://www.mdpi.com/1424-2818/13/7/300)

# Pionus maximiliani – Beni savanna – Bolivia

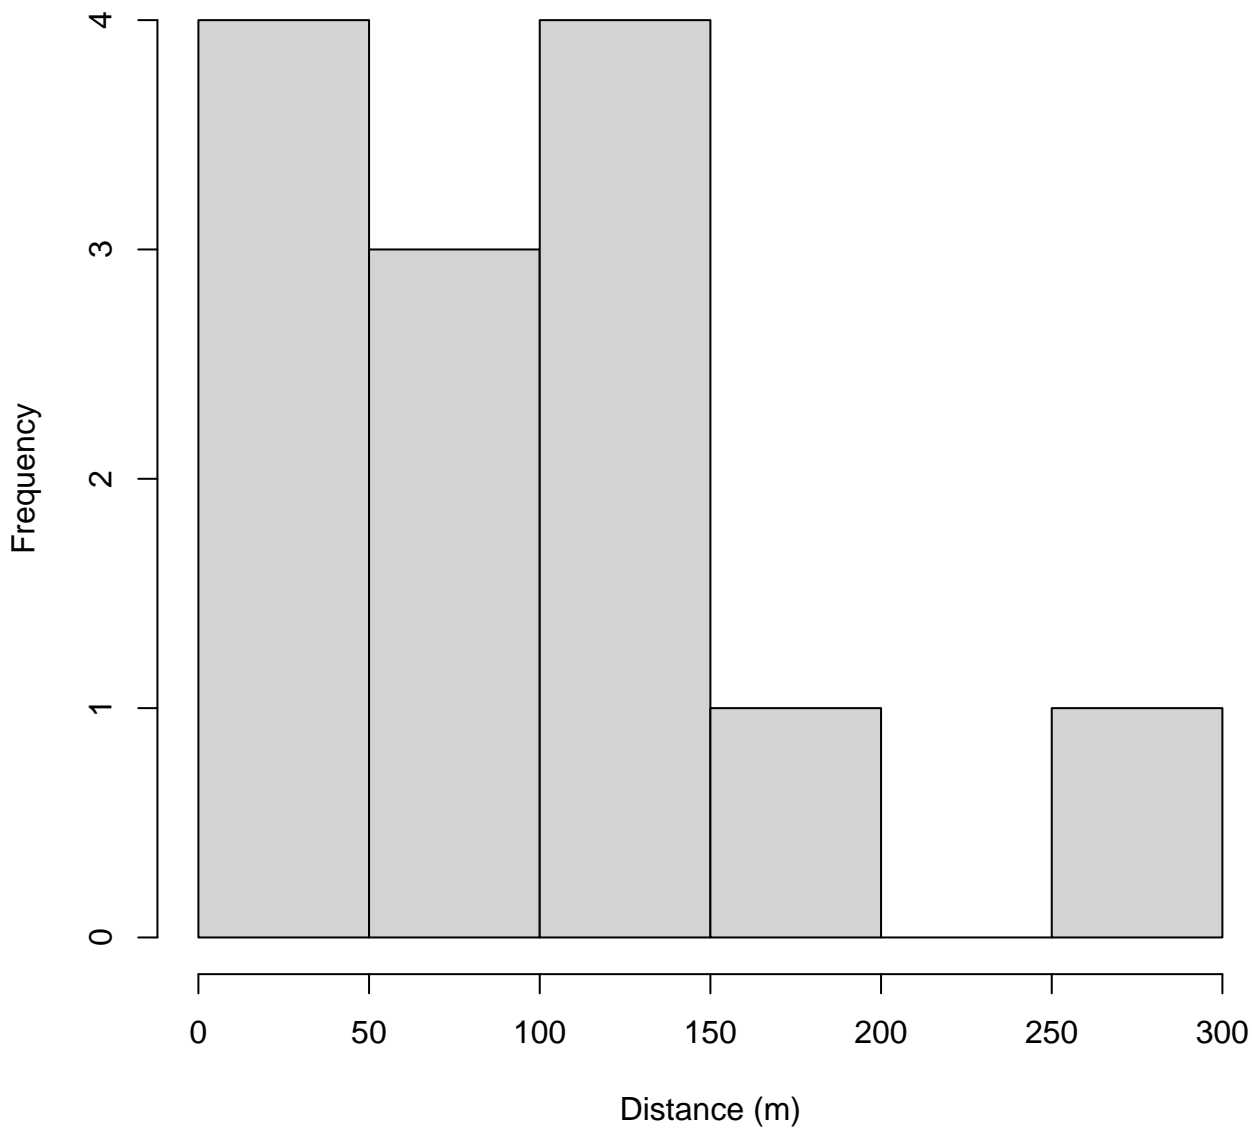

# Pionus maximiliani – Beni savanna – Bolivia

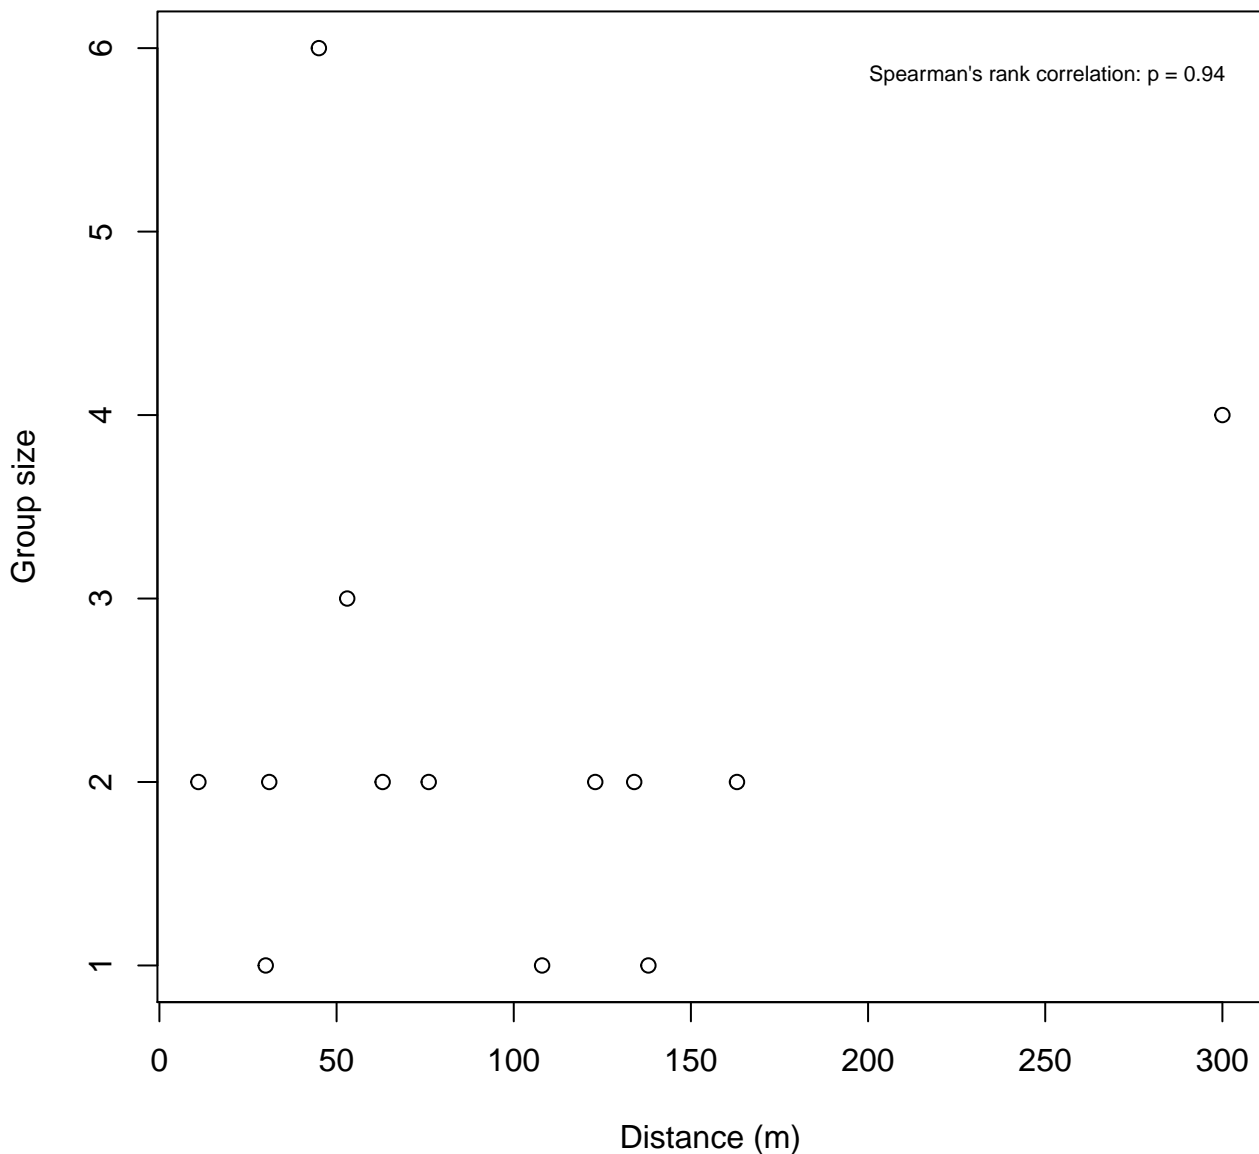

Pionus maximiliani – Beni savanna – Bolivia (N = 13, key function = hn)

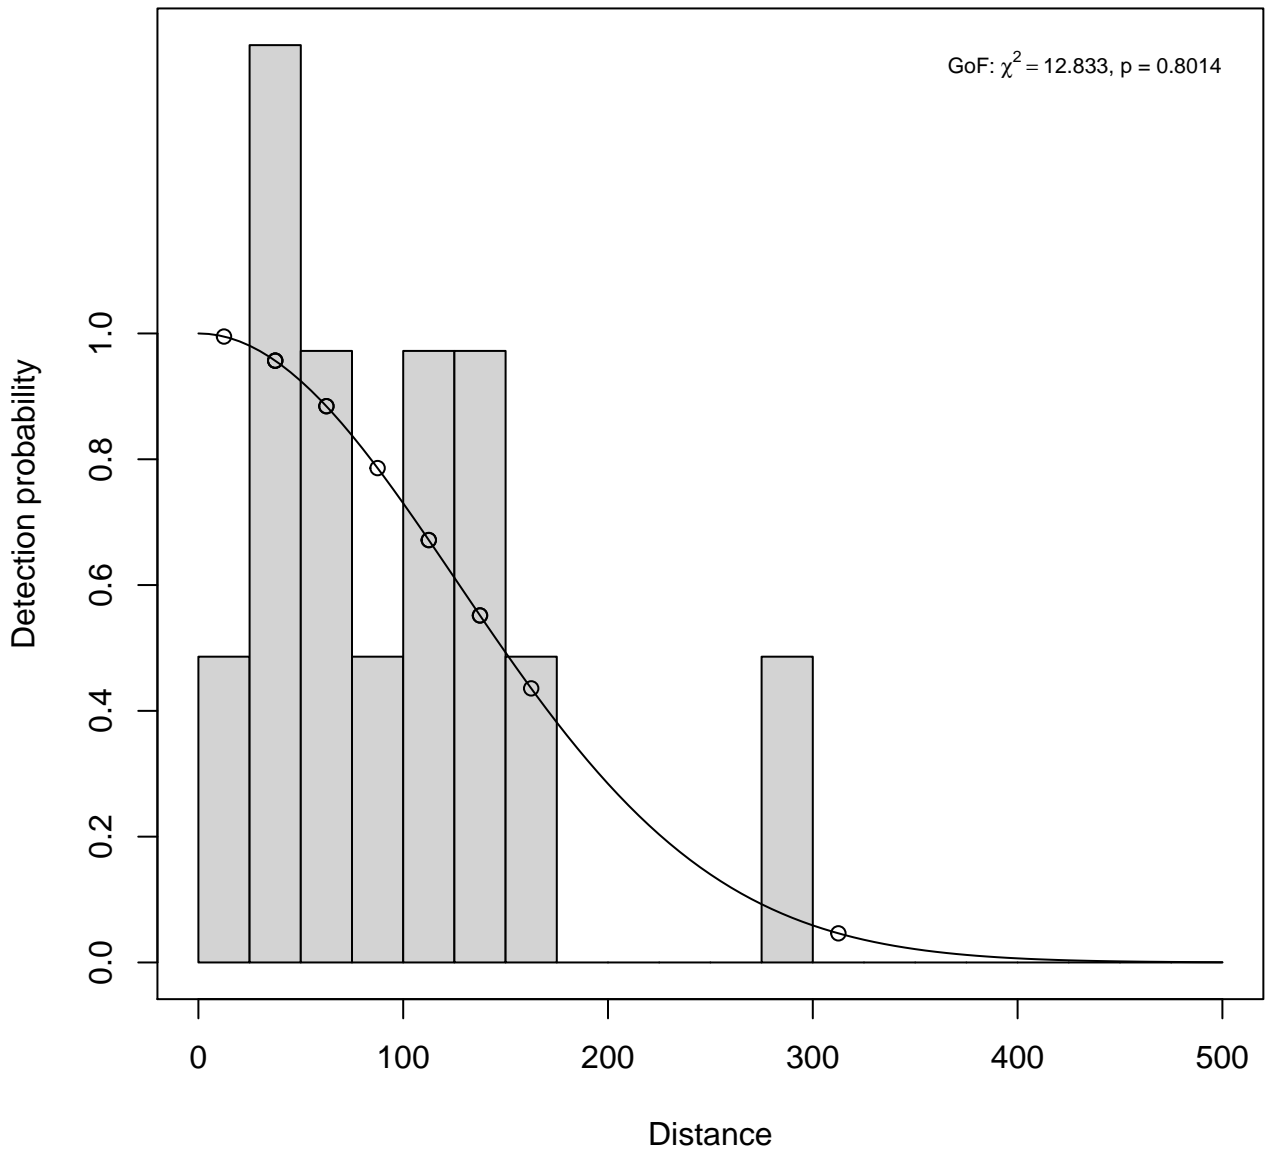

Pionus maximiliani – Beni savanna – Bolivia (N = 13, key function = hn)

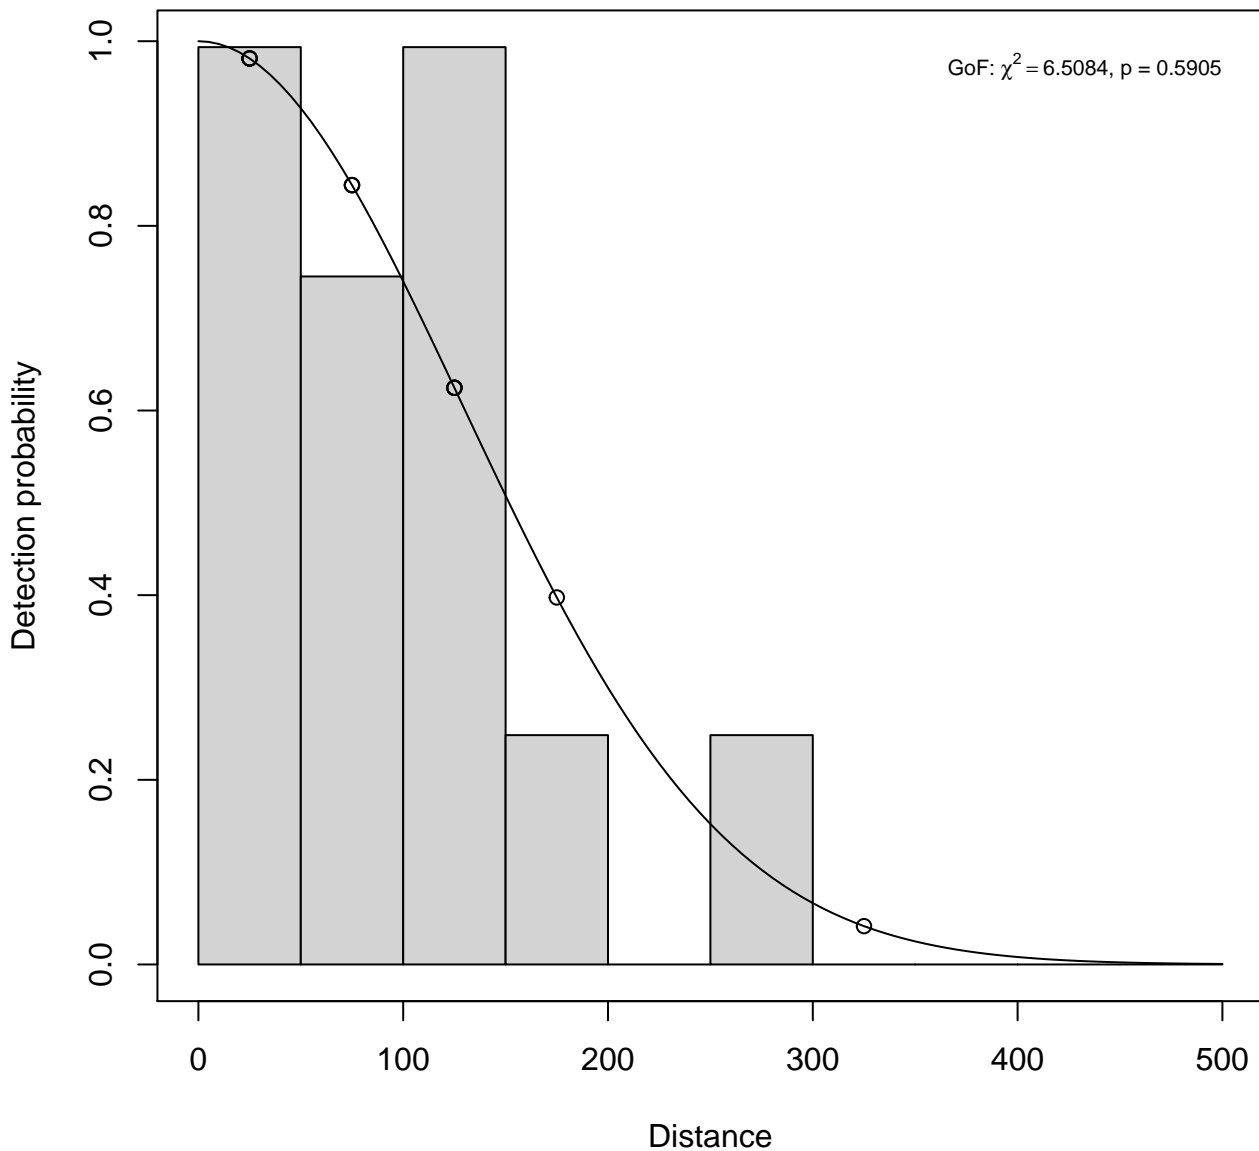

Pionus maximiliani – Beni savanna – Bolivia (N = 13, key function = hn)

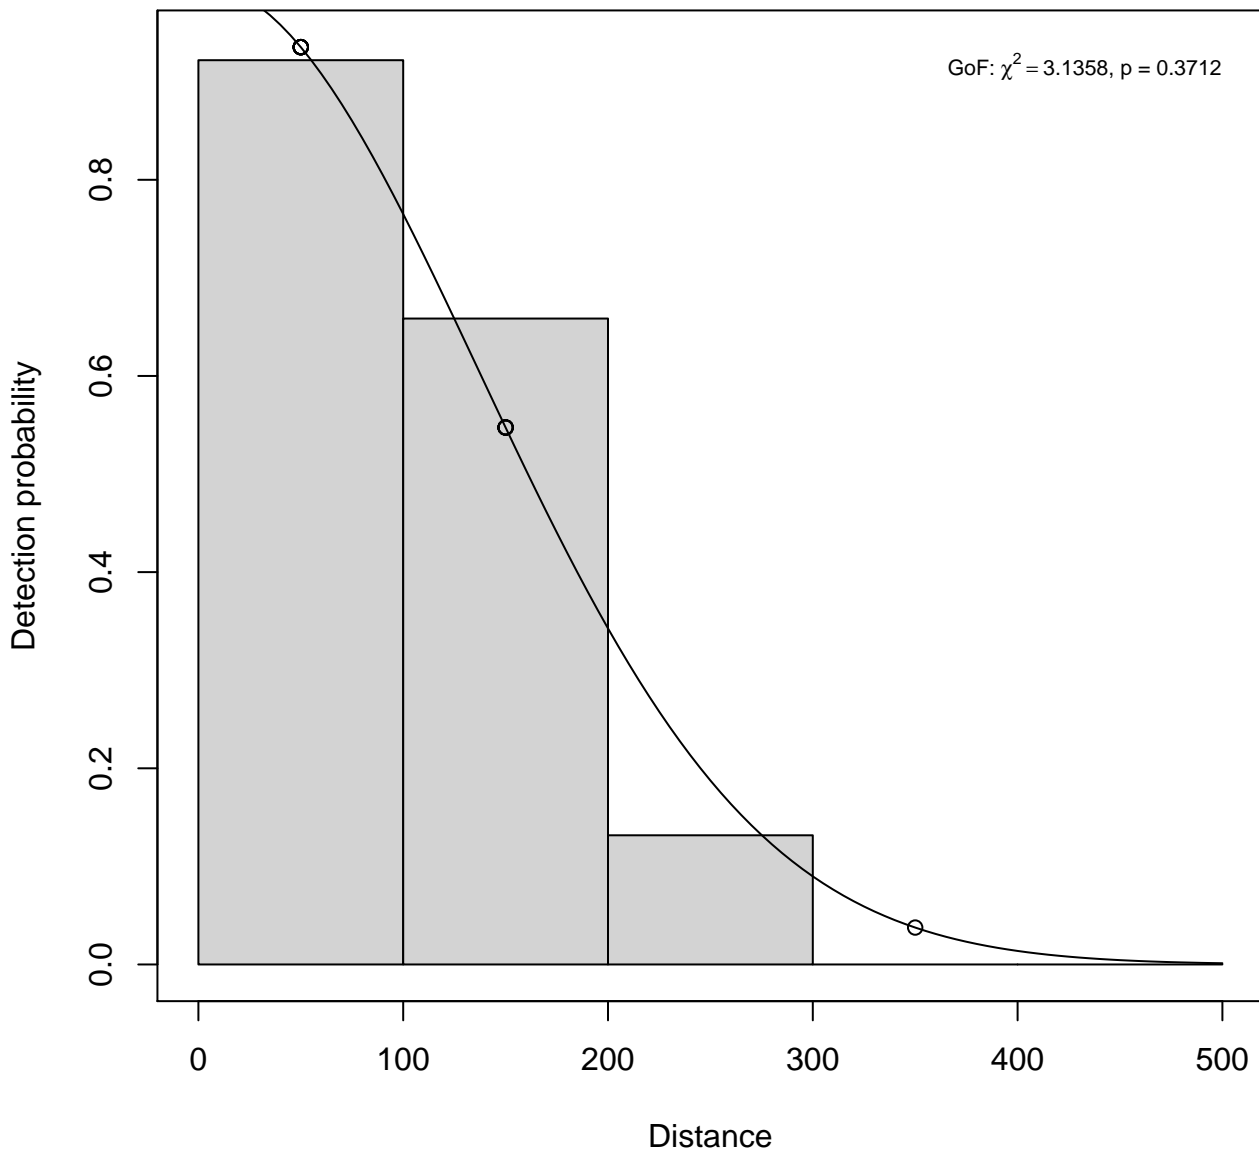

Supplement: s1 [file s1]
