# Supplementary material
Source: MDPI journal article supplement (https://www.mdpi.com/1424-2818/13/7/300)

# **Ara chloropterus – Cerrado – Brazil**

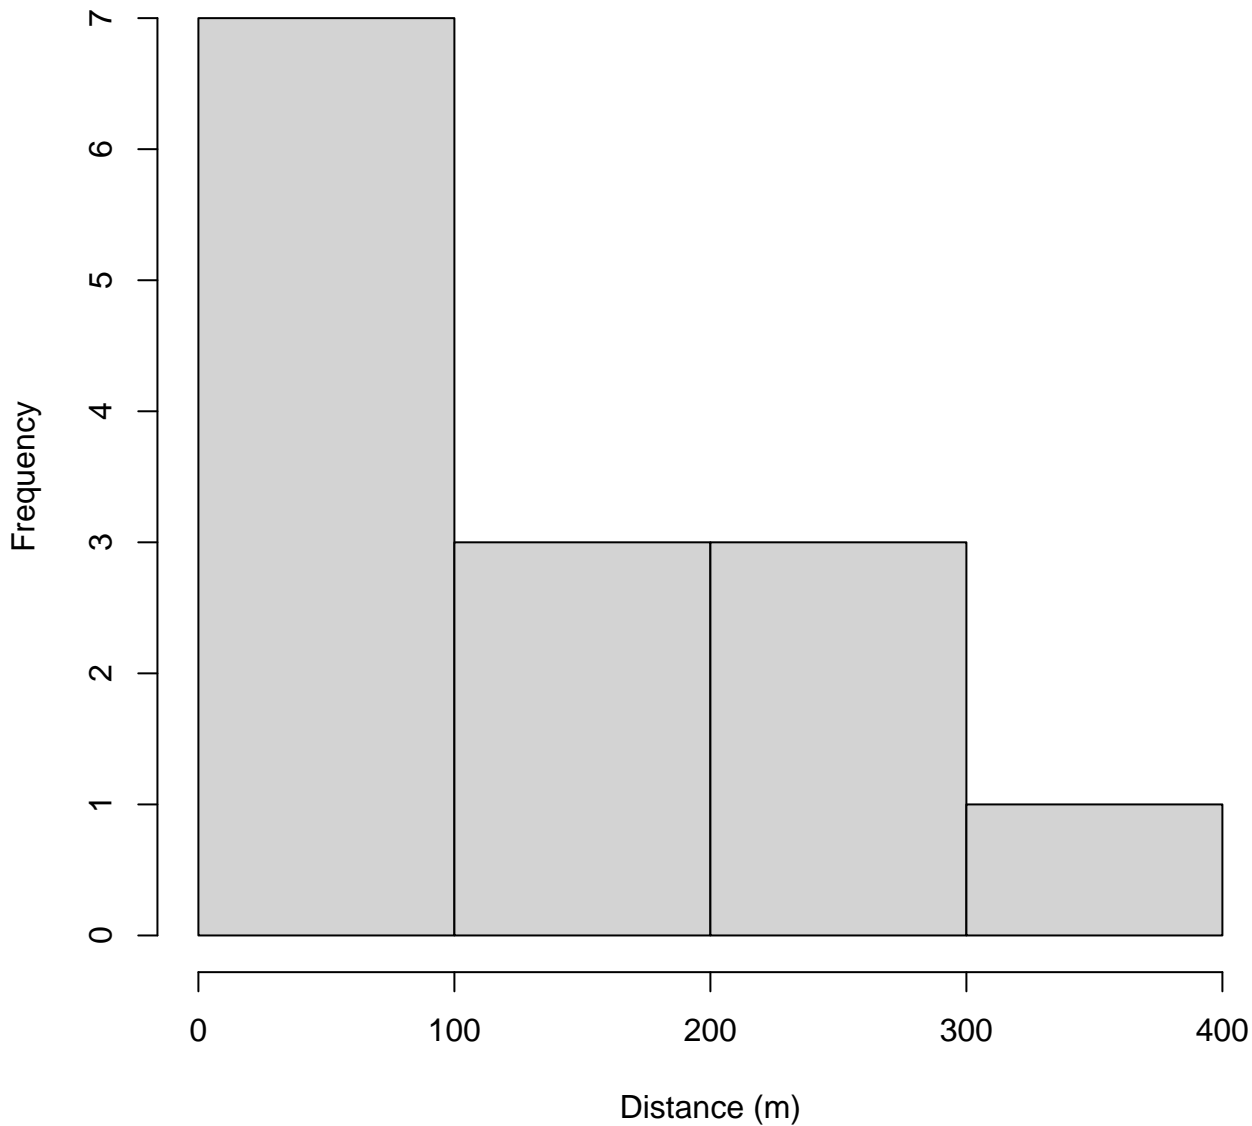

# Ara chloropterus – Cerrado – Brazil

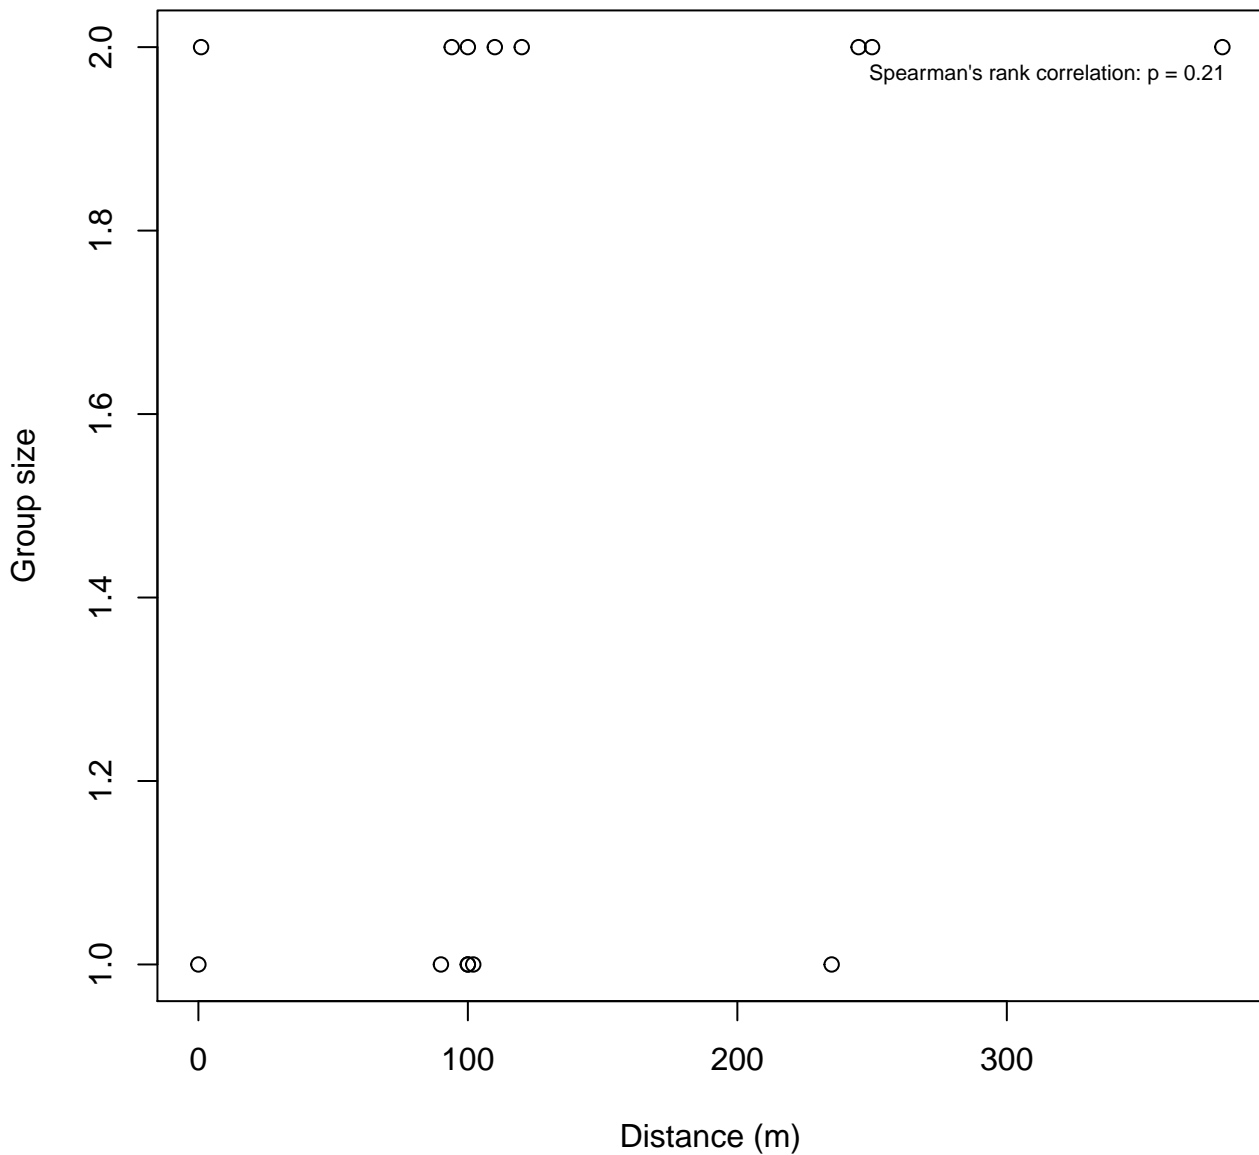

Ara chloropterus – Cerrado – Brazil (N = 14, key function = unif)

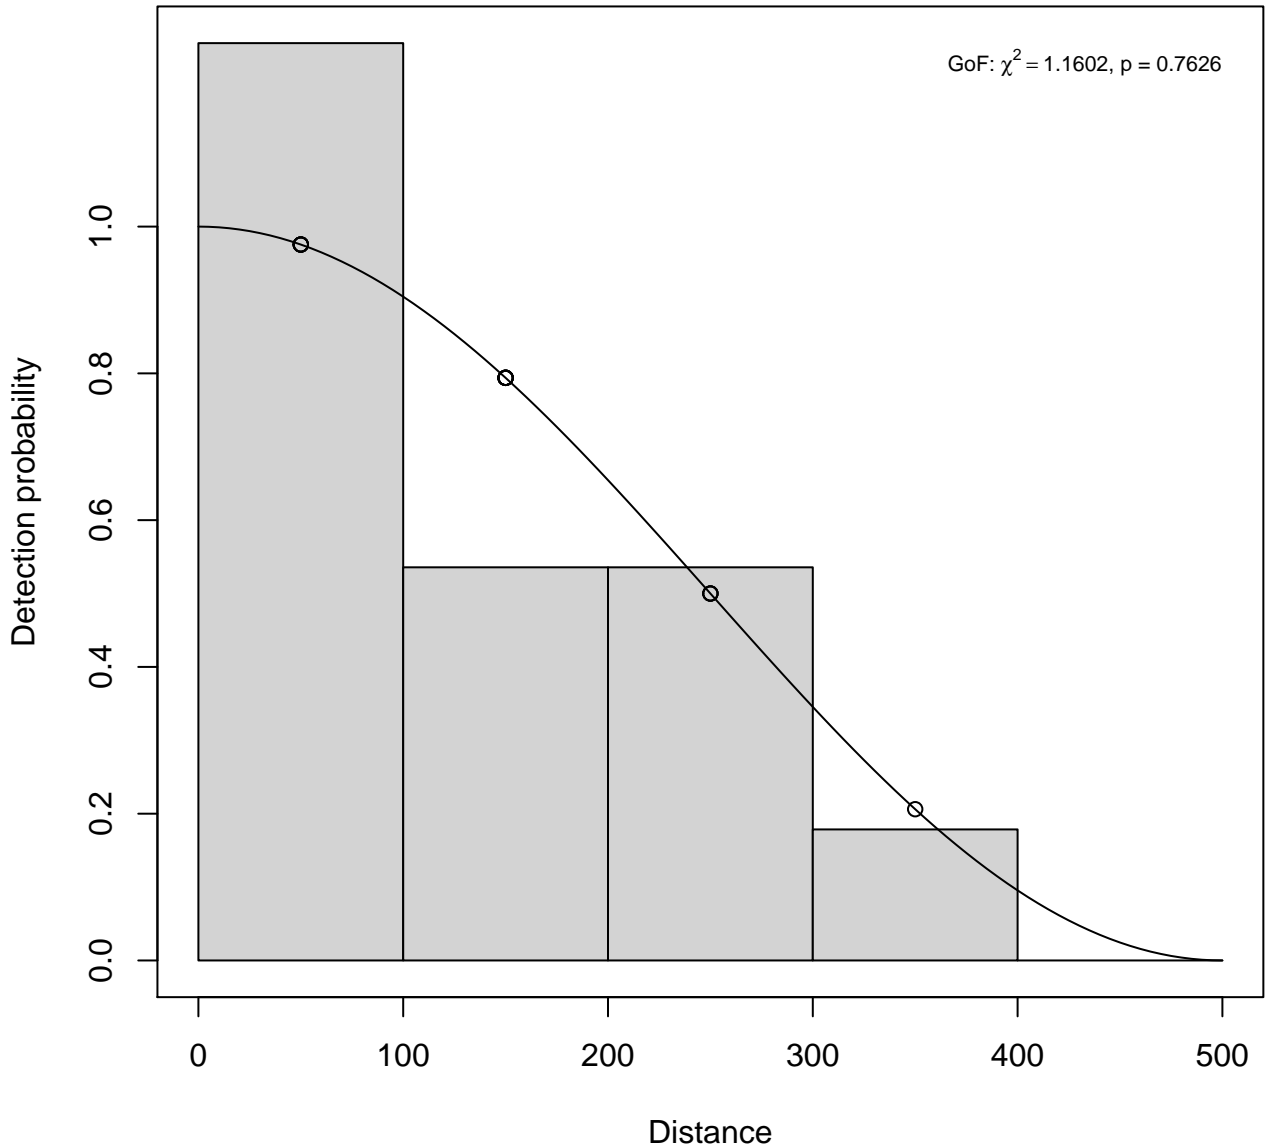

Ara chloropterus – Cerrado – Brazil (N = 14, key function = unif)

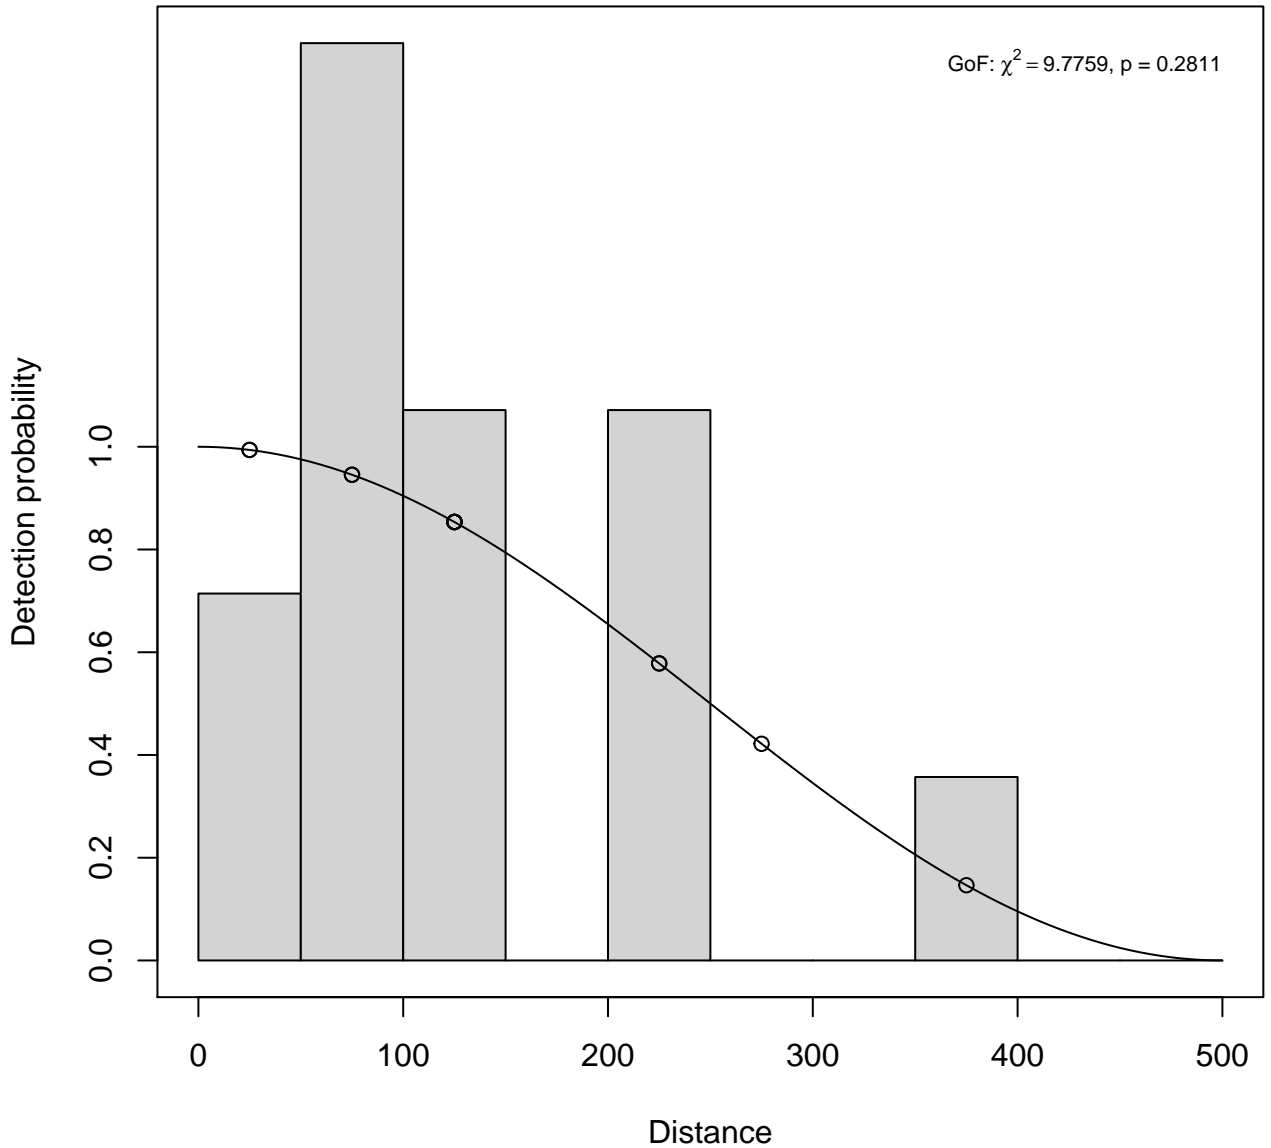

Ara chloropterus – Cerrado – Brazil (N = 14, key function = hn)

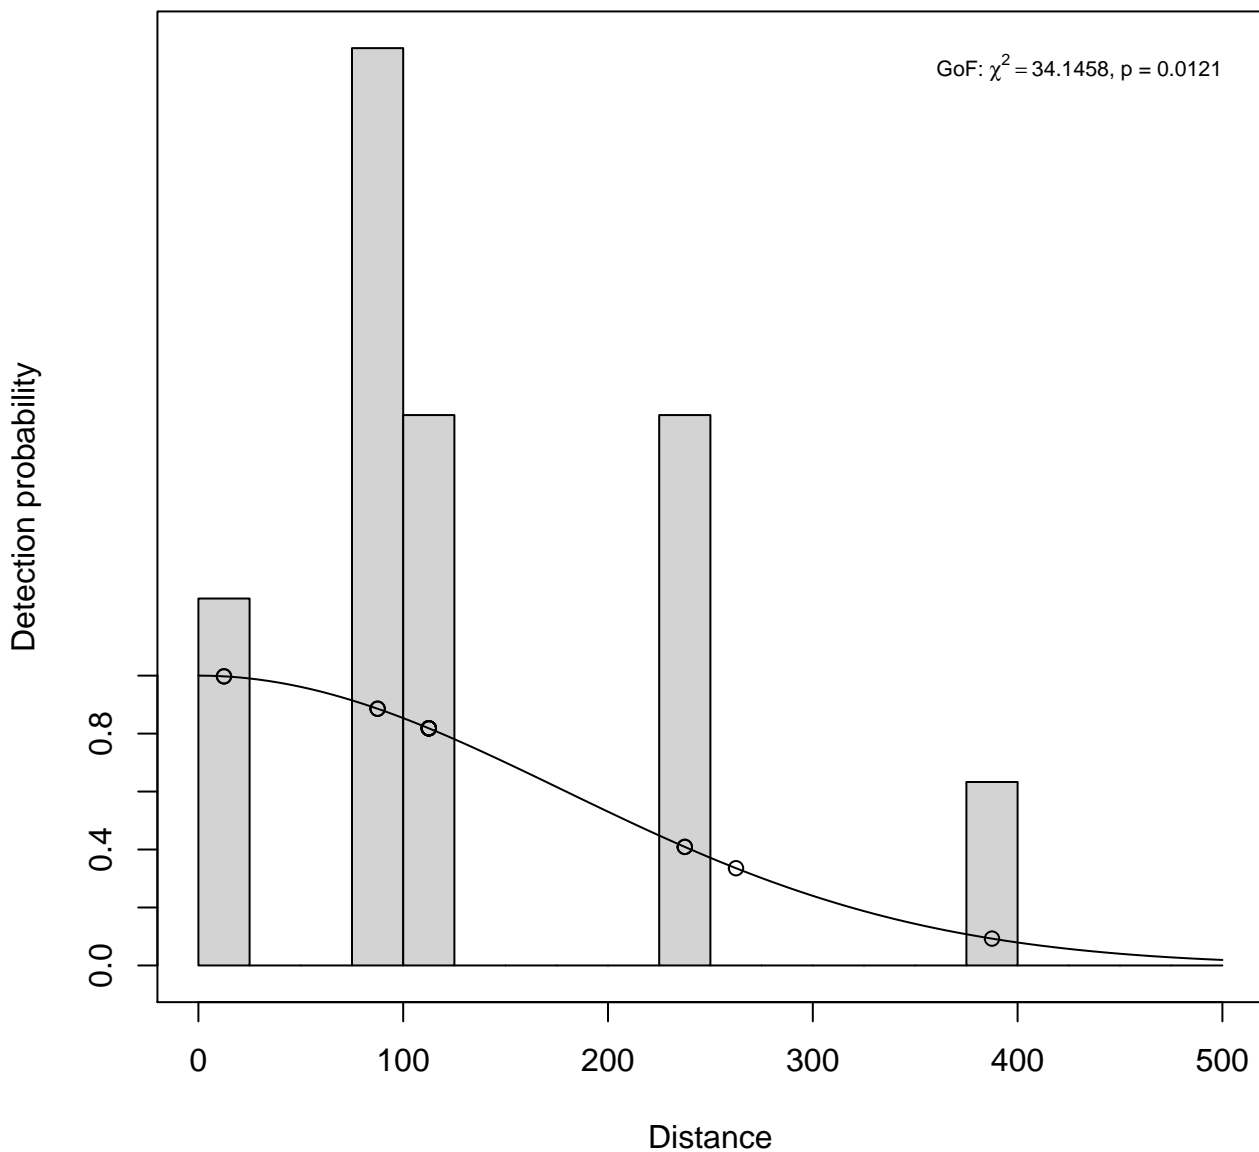

Supplement: s1 [file s1]
