# Supplementary material
Source: MDPI journal article supplement (https://www.mdpi.com/1424-2818/13/7/300)

# Broto $geris$ jugularis – Guajira–Barranquilla xeric scrub – Colombia

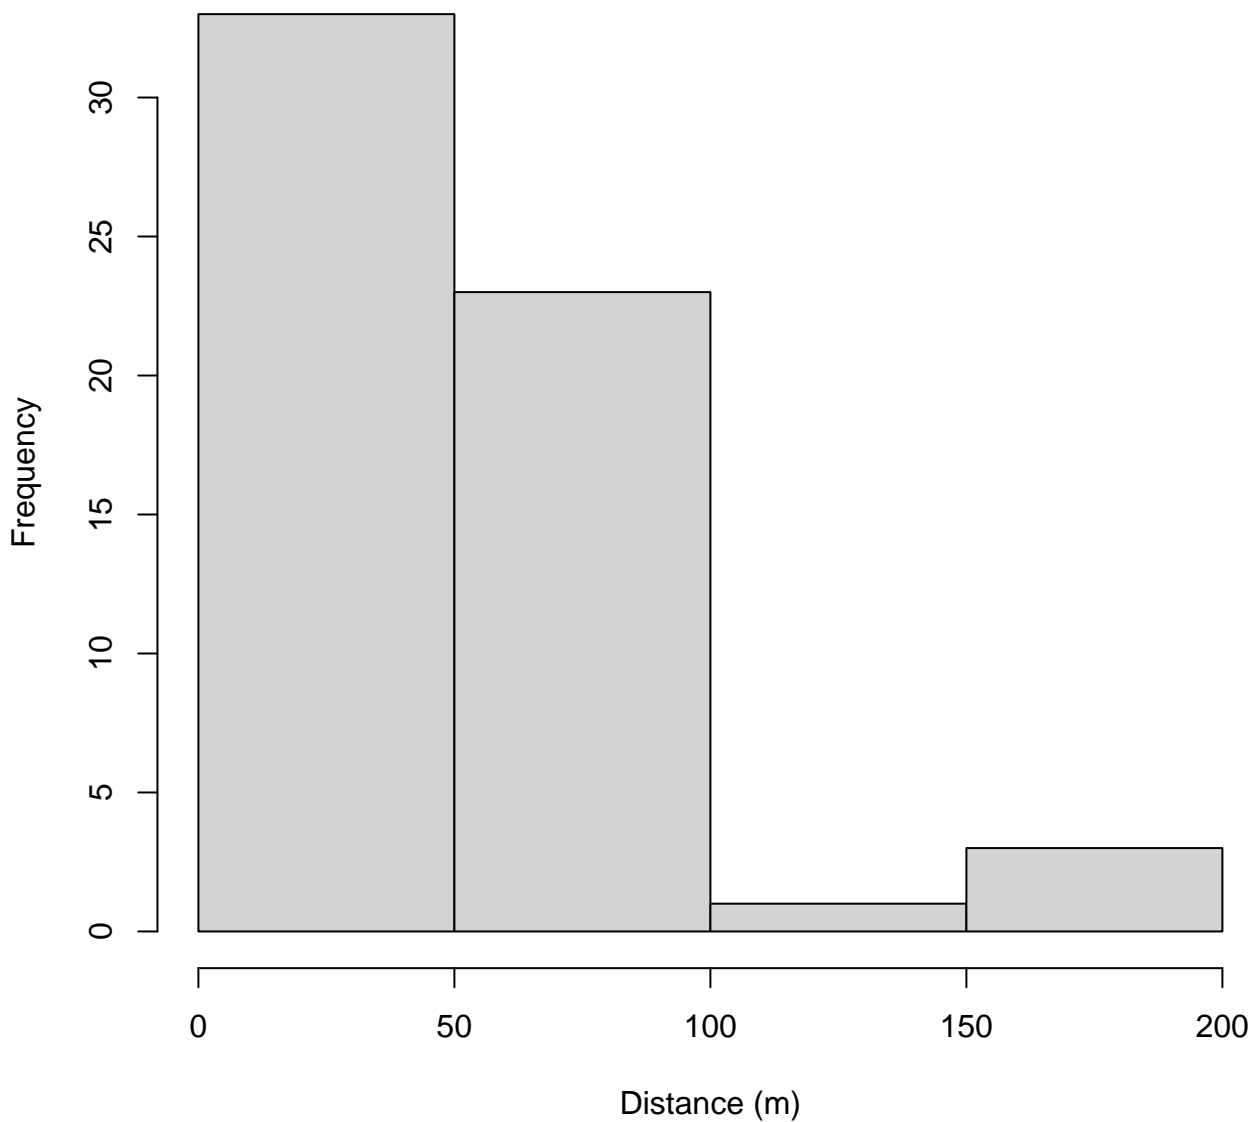

# Brotogetis jugularis – Guajira–Barranquilla xeric scrub – Colombia

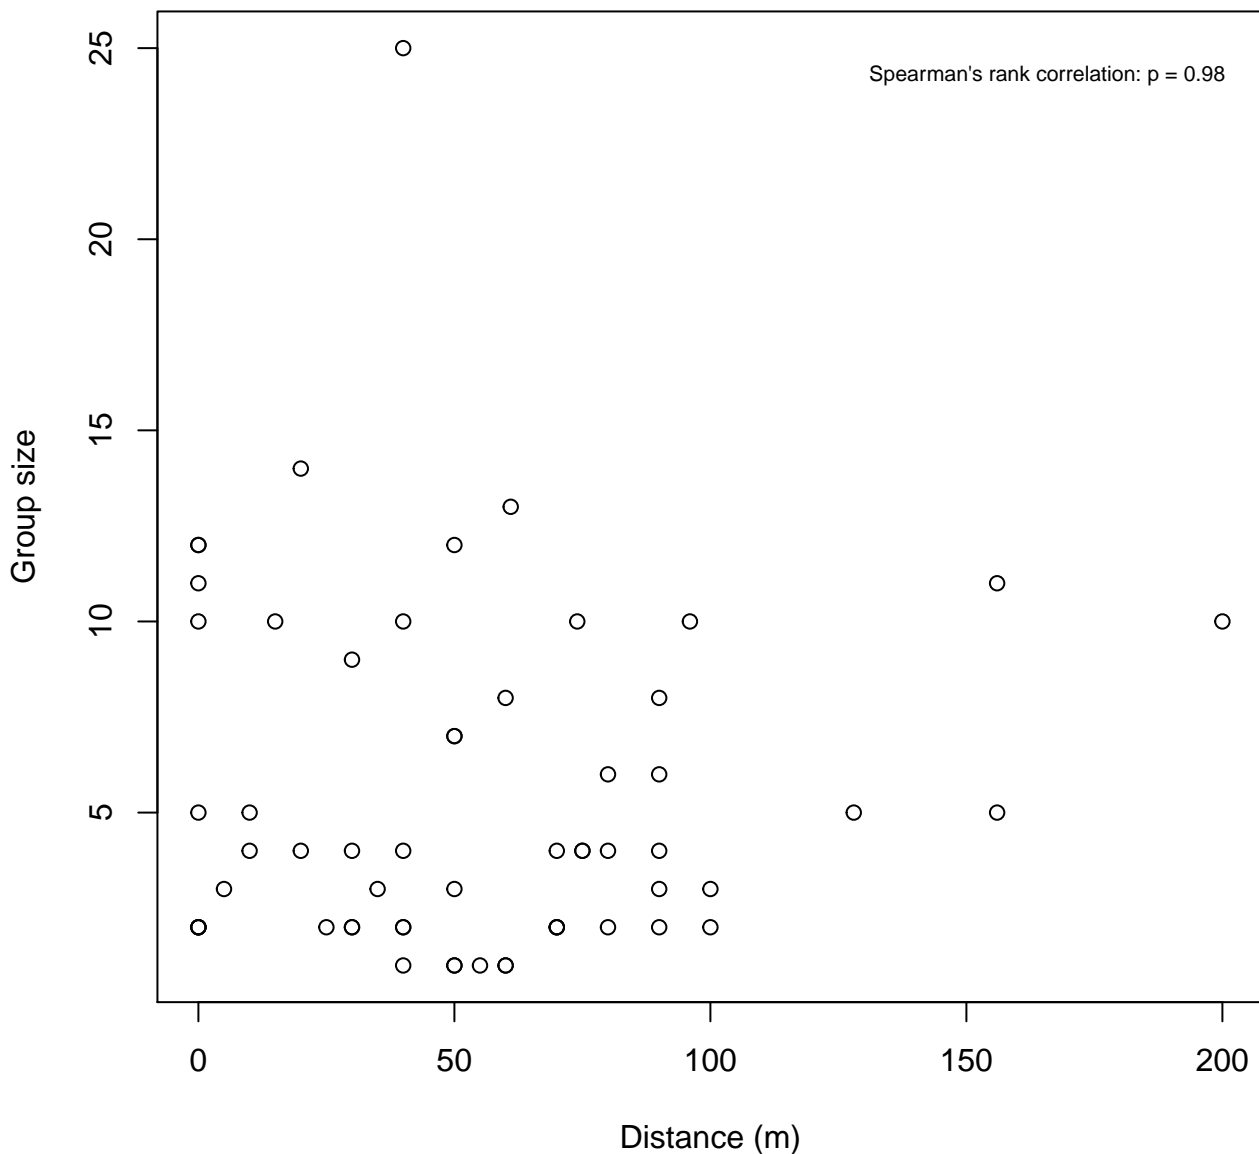

Brotojeris jugularis – Guajira–Barranquilla xeric scrub – Colombia (N = 60, key function = hr)

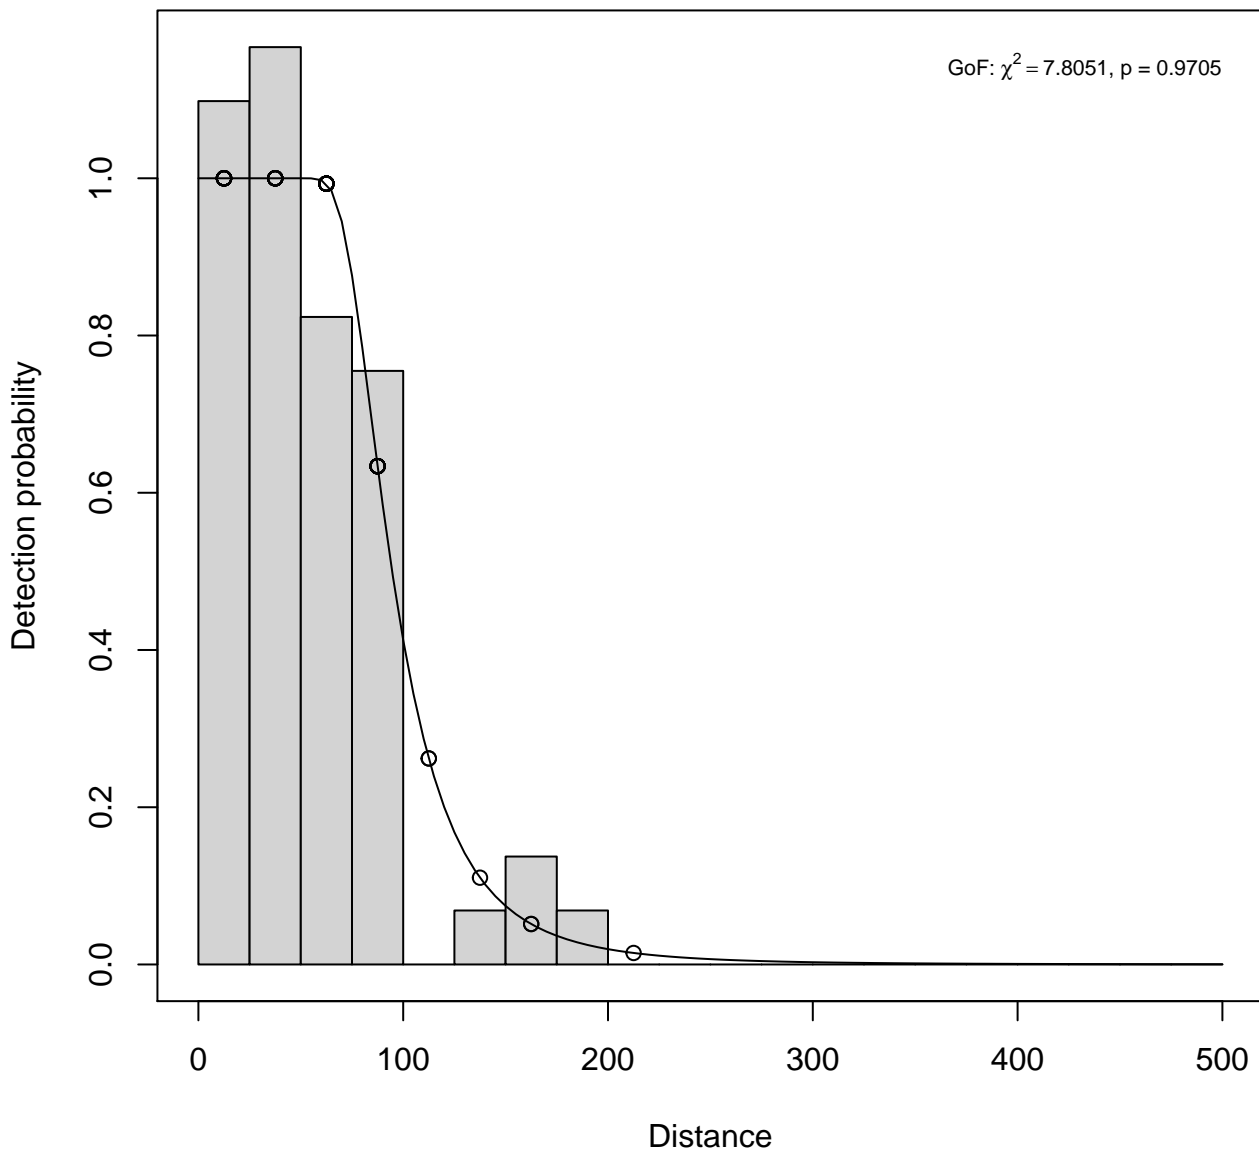

*Brotogeris jugularis* – Guajira–Barranquilla xeric scrub – Colombia (N = 60, key function = hr)

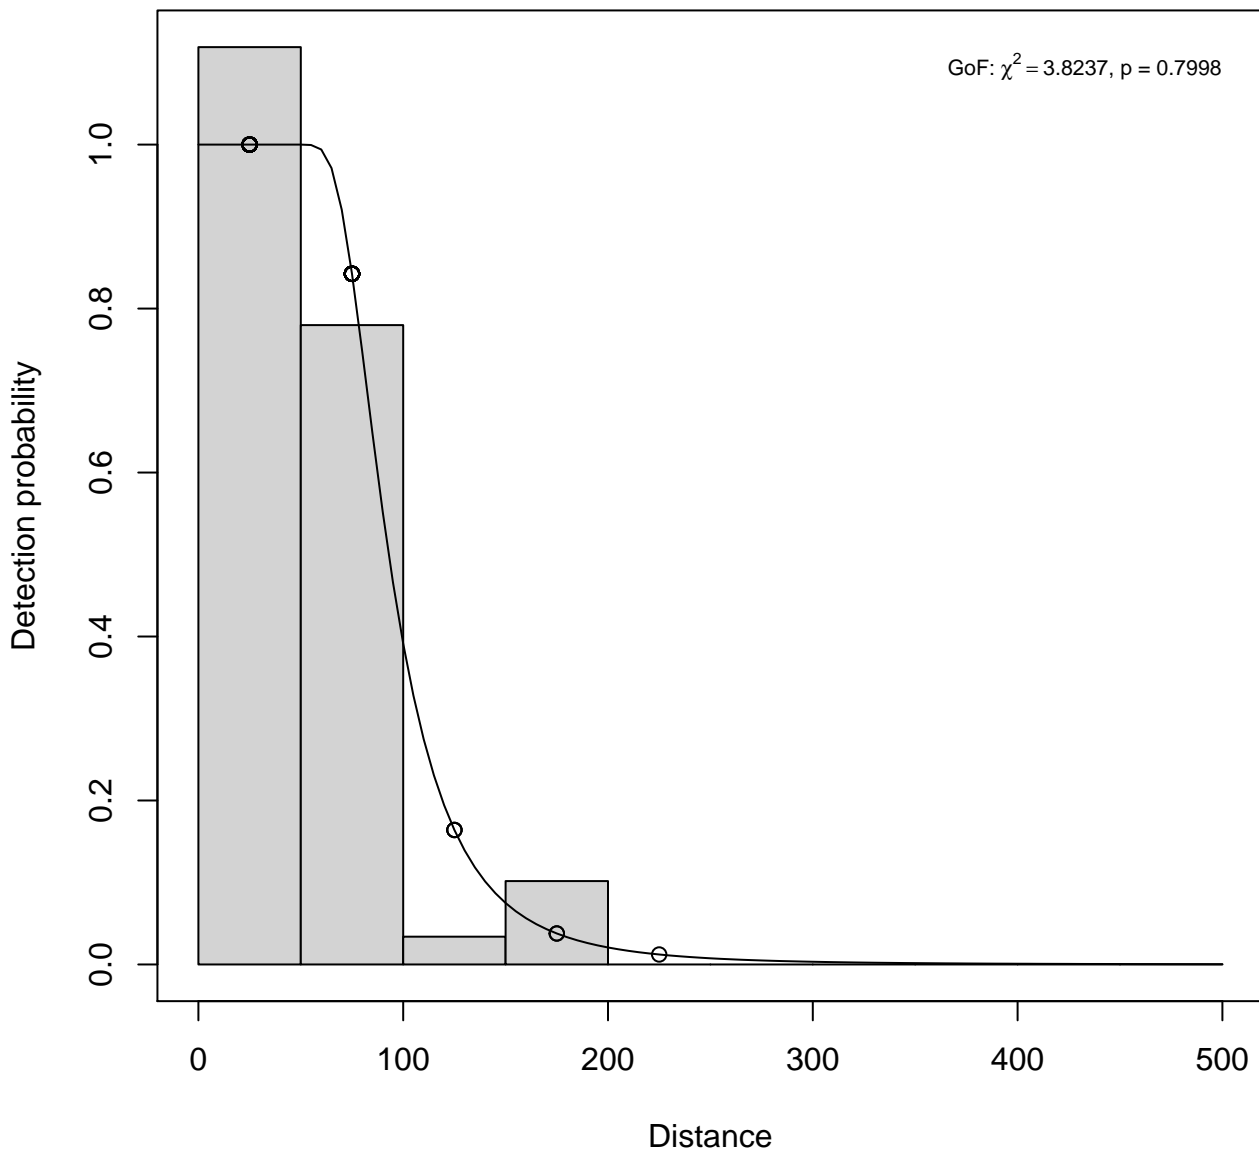

*Brotogeris jugularis* – Guajira–Barranquilla xeric scrub – Colombia (N = 60, key function = hr)

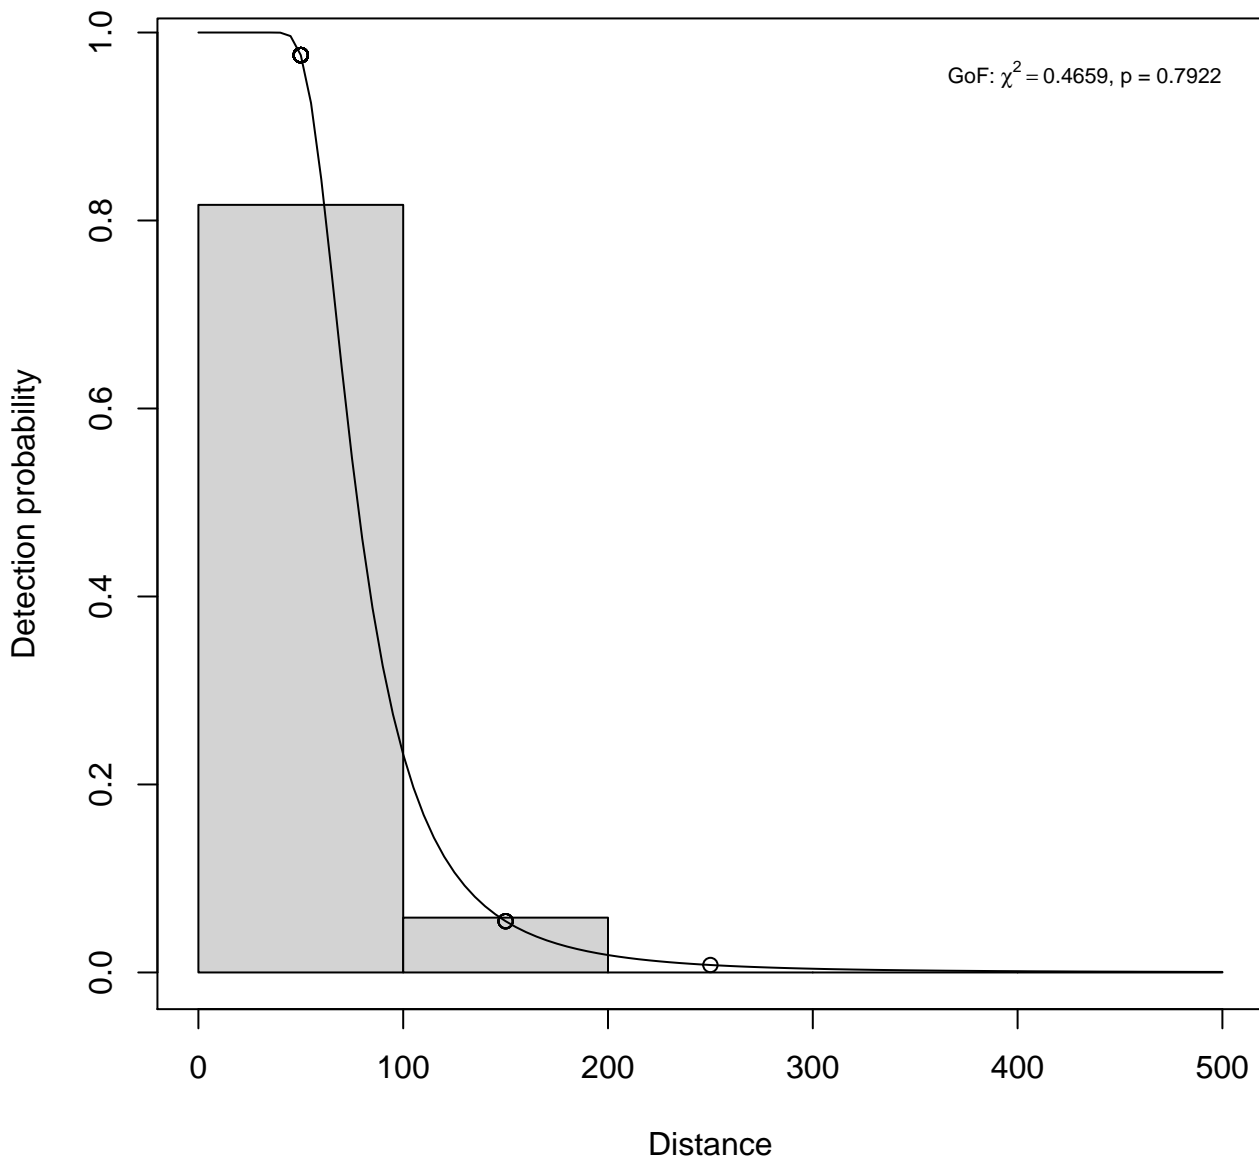

Supplement: s1 [file s1]
