# Supplementary material
Source: MDPI journal article supplement (https://www.mdpi.com/1424-2818/13/7/300)

# Amazona albifrons – Central American dry forests – Costa Rica

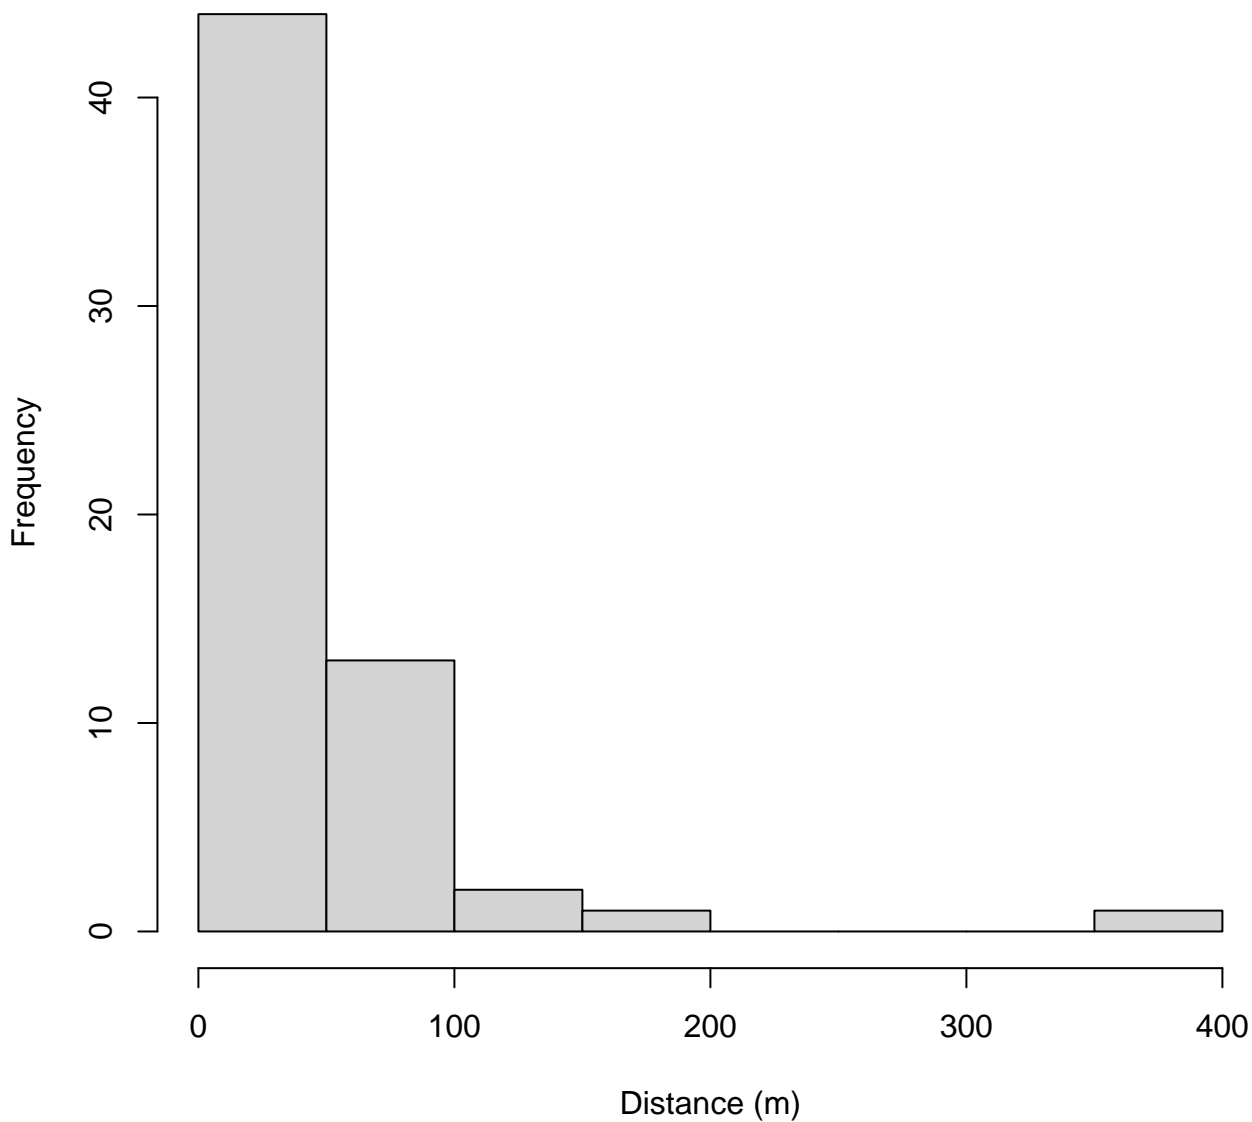

# Amazona albifrons – Central American dry forests – Costa Rica

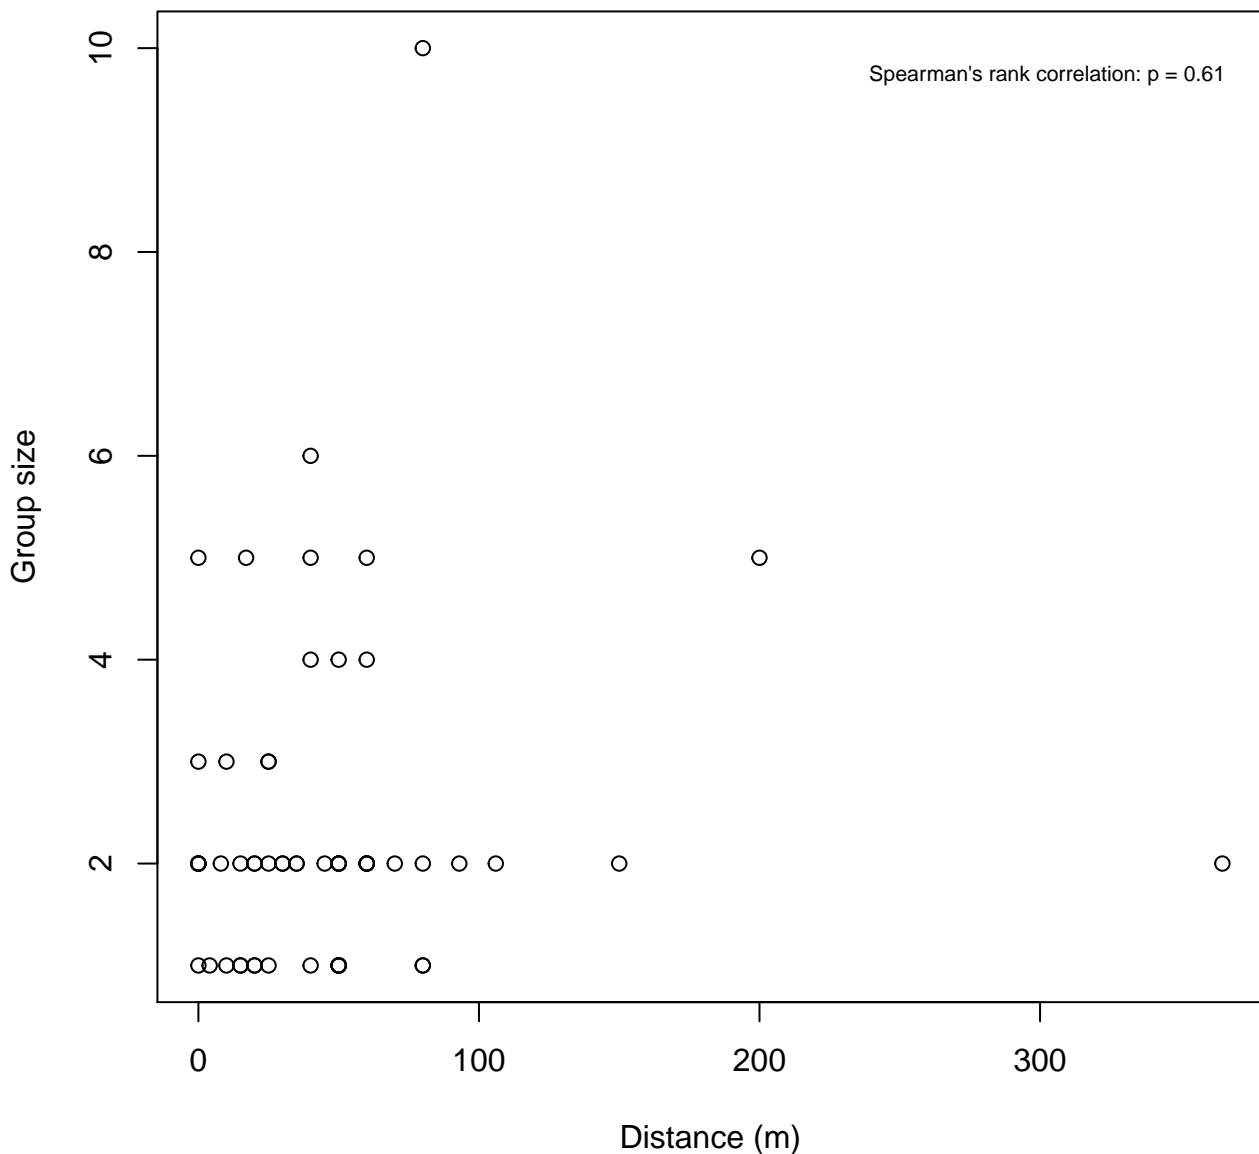

Amazona albifrons – Central American dry forests – Costa Rica (N = 61, key function = hr)

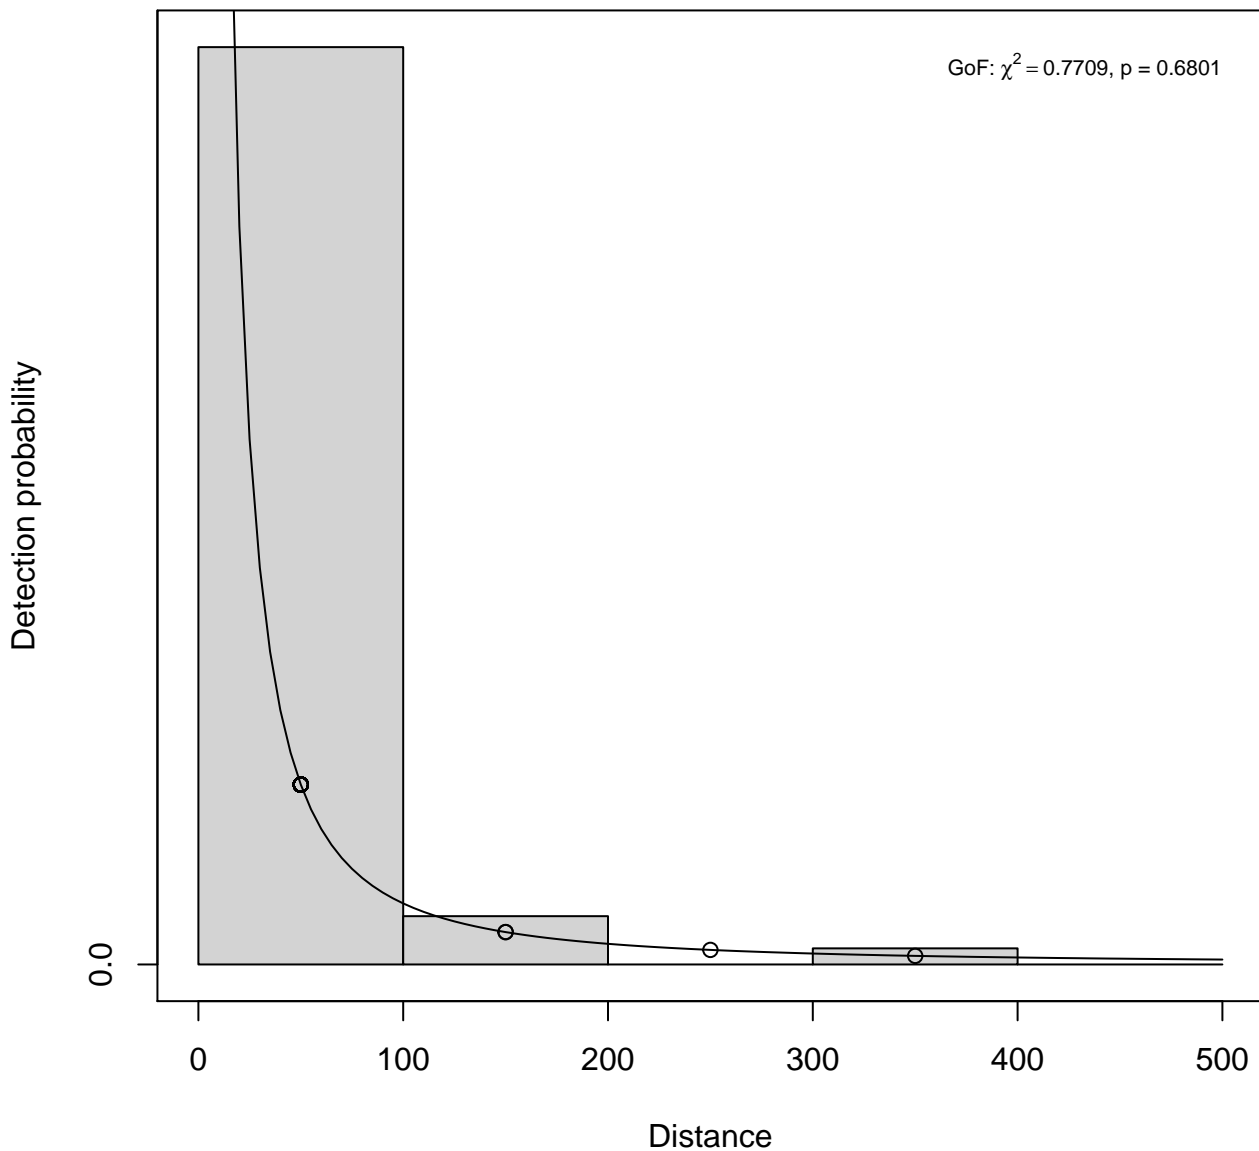

Amazona albifrons – Central American dry forests – Costa Rica (N = 61, key function = hr)

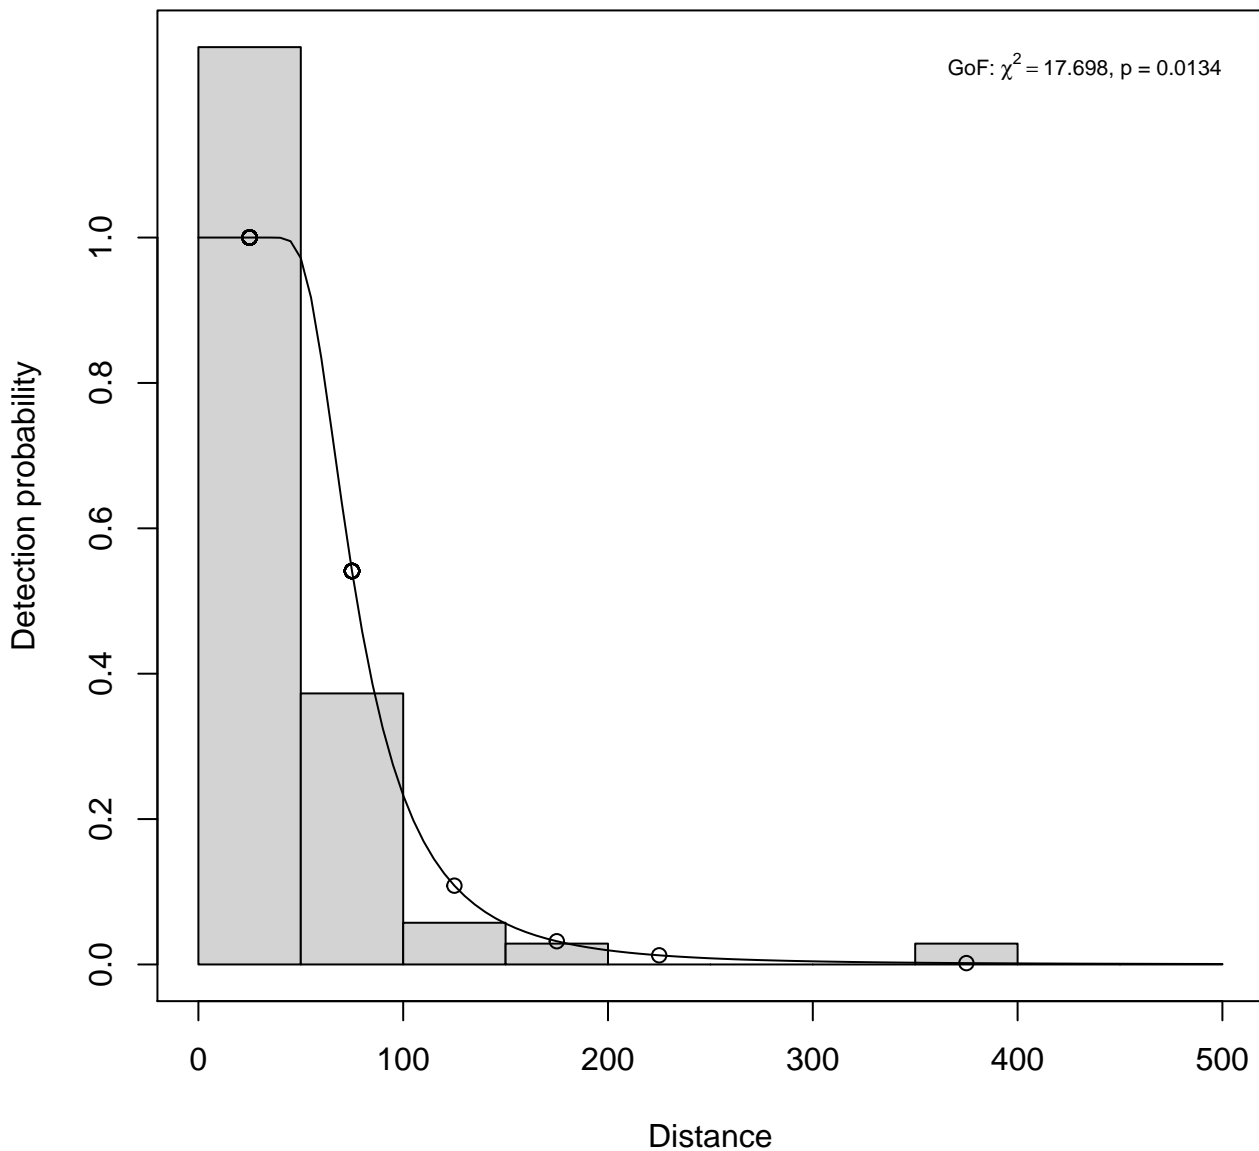

Amazona albifrons – Central American dry forests – Costa Rica (N = 61, key function = hr)

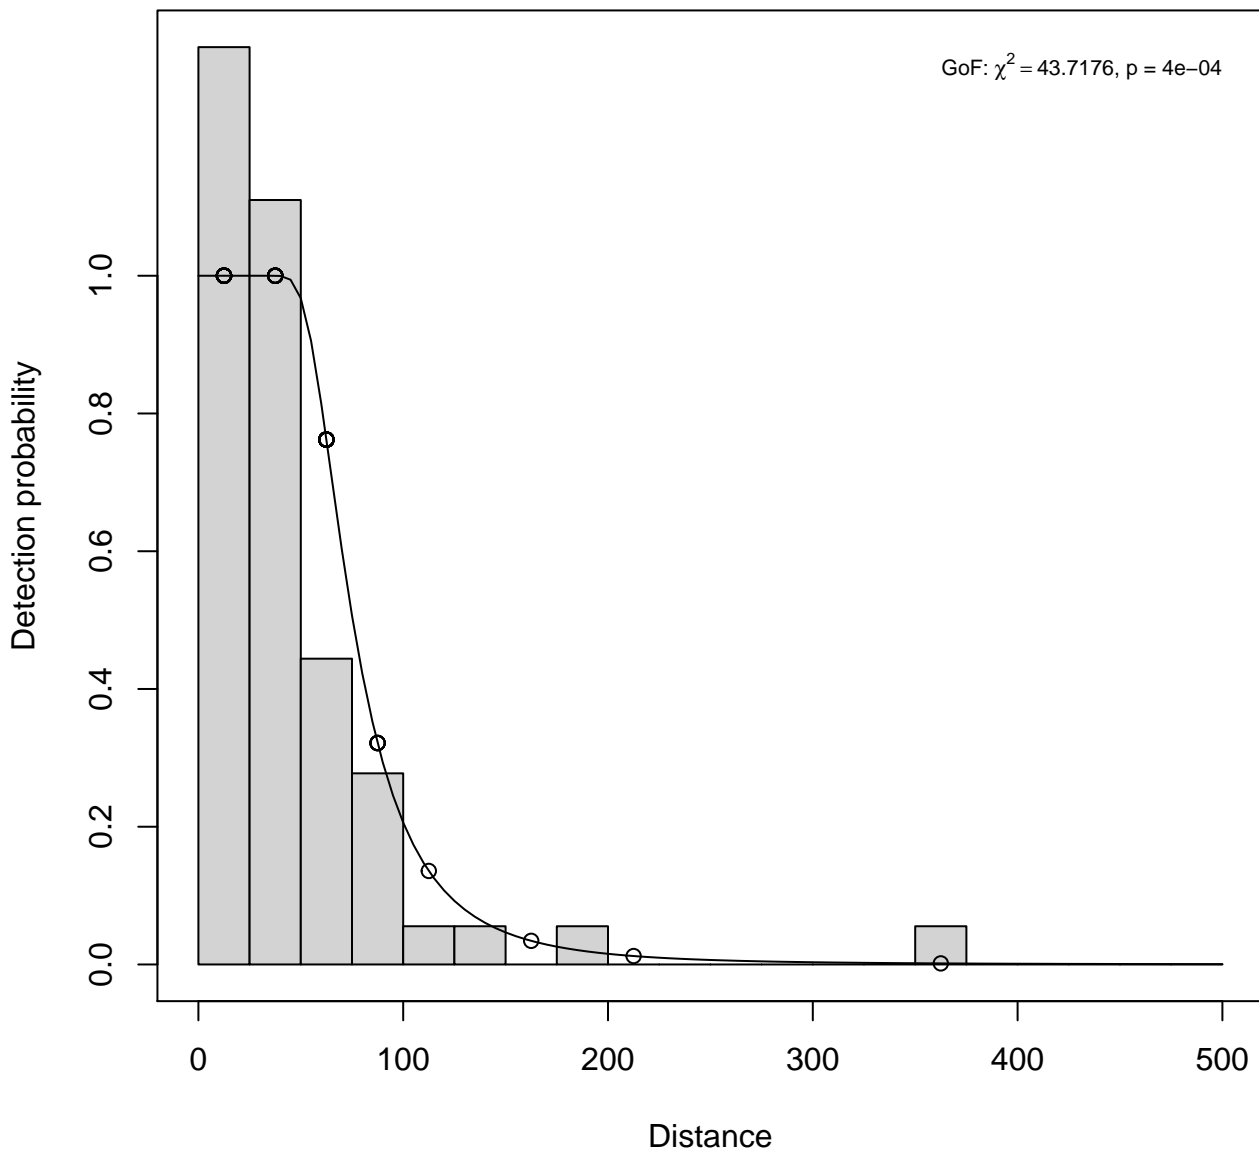

Supplement: s1 [file s1]
