# Supplementary material
Source: MDPI journal article supplement (https://www.mdpi.com/1424-2818/13/7/300)

# **Brotogetis jugularis – Choco–Darian moist forests – Colombia**

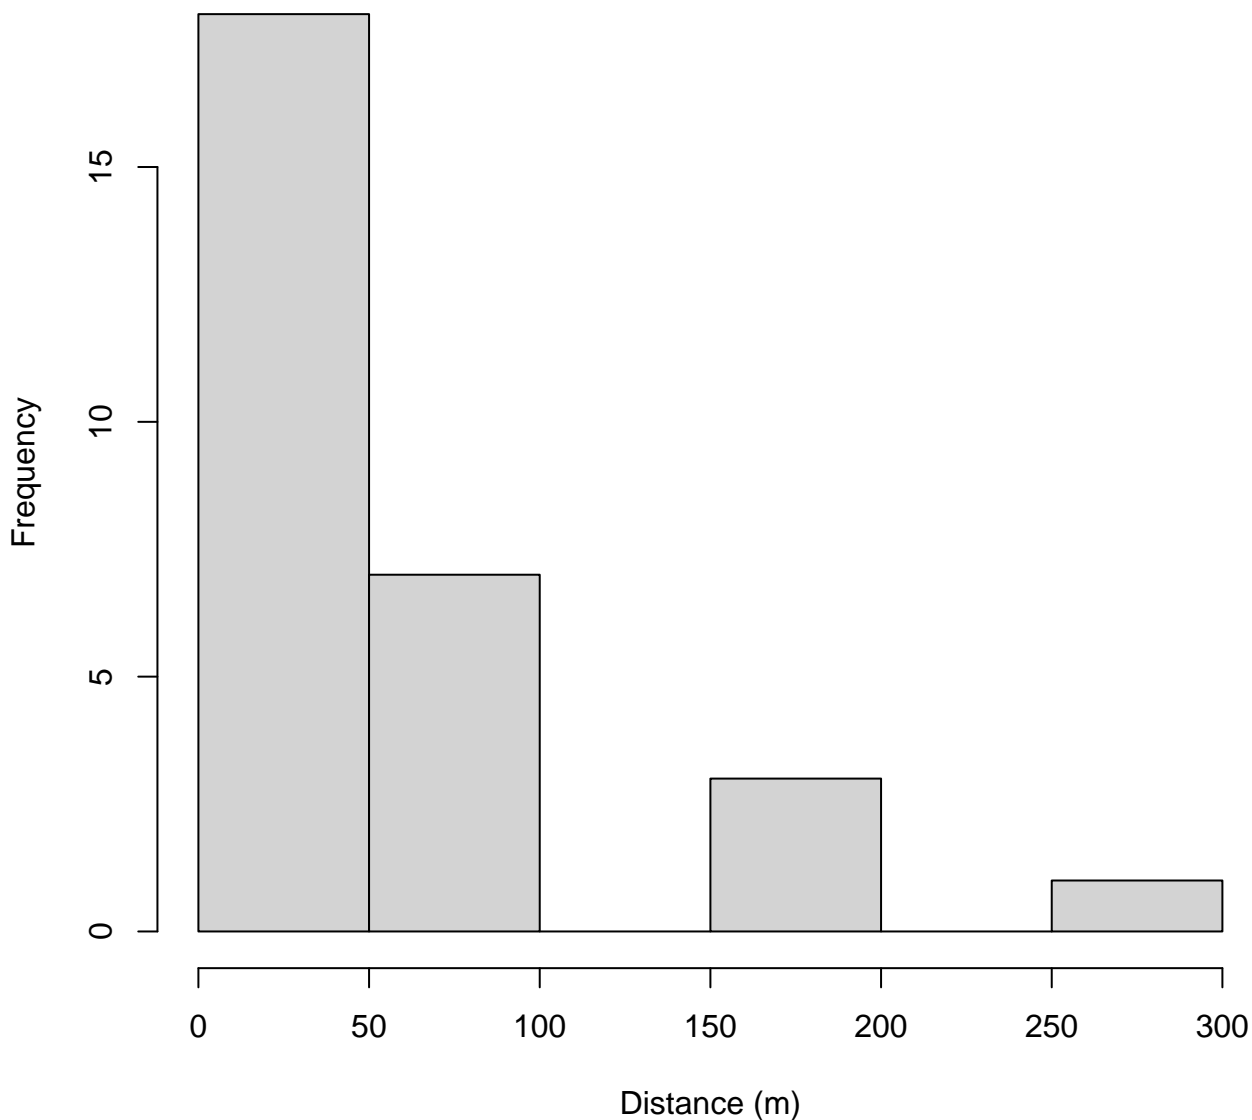

# Brotoyeris jugularis – Choco–Darian moist forests – Colombia

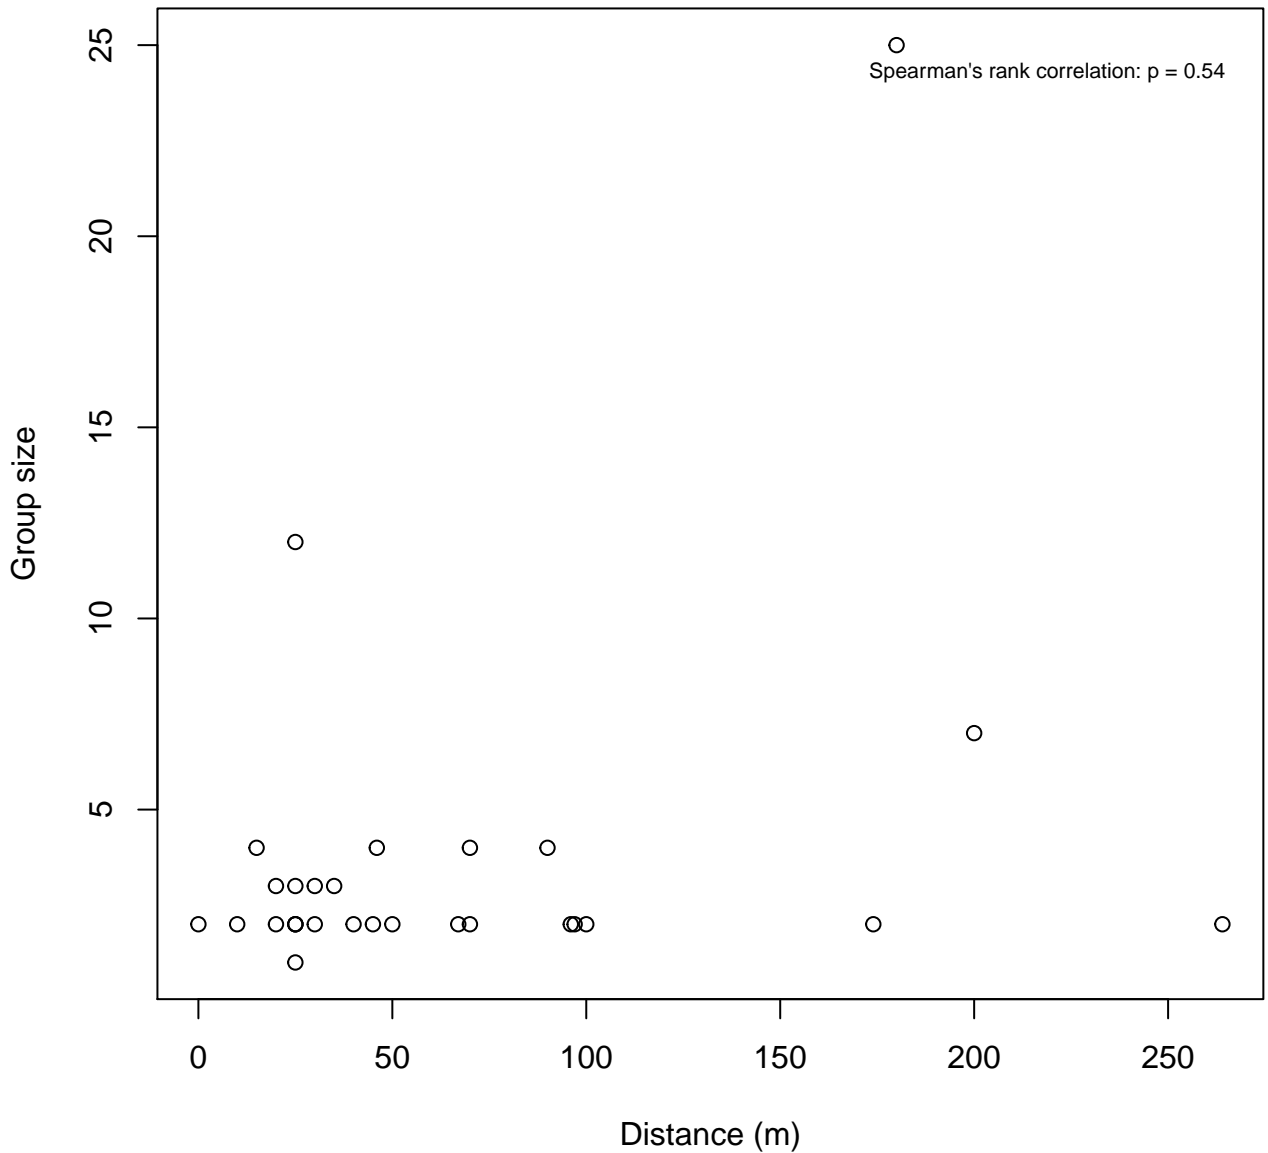

*Brotogeris jugularis* – Choco–Darian moist forests – Colombia (N = 29, key function = hr)

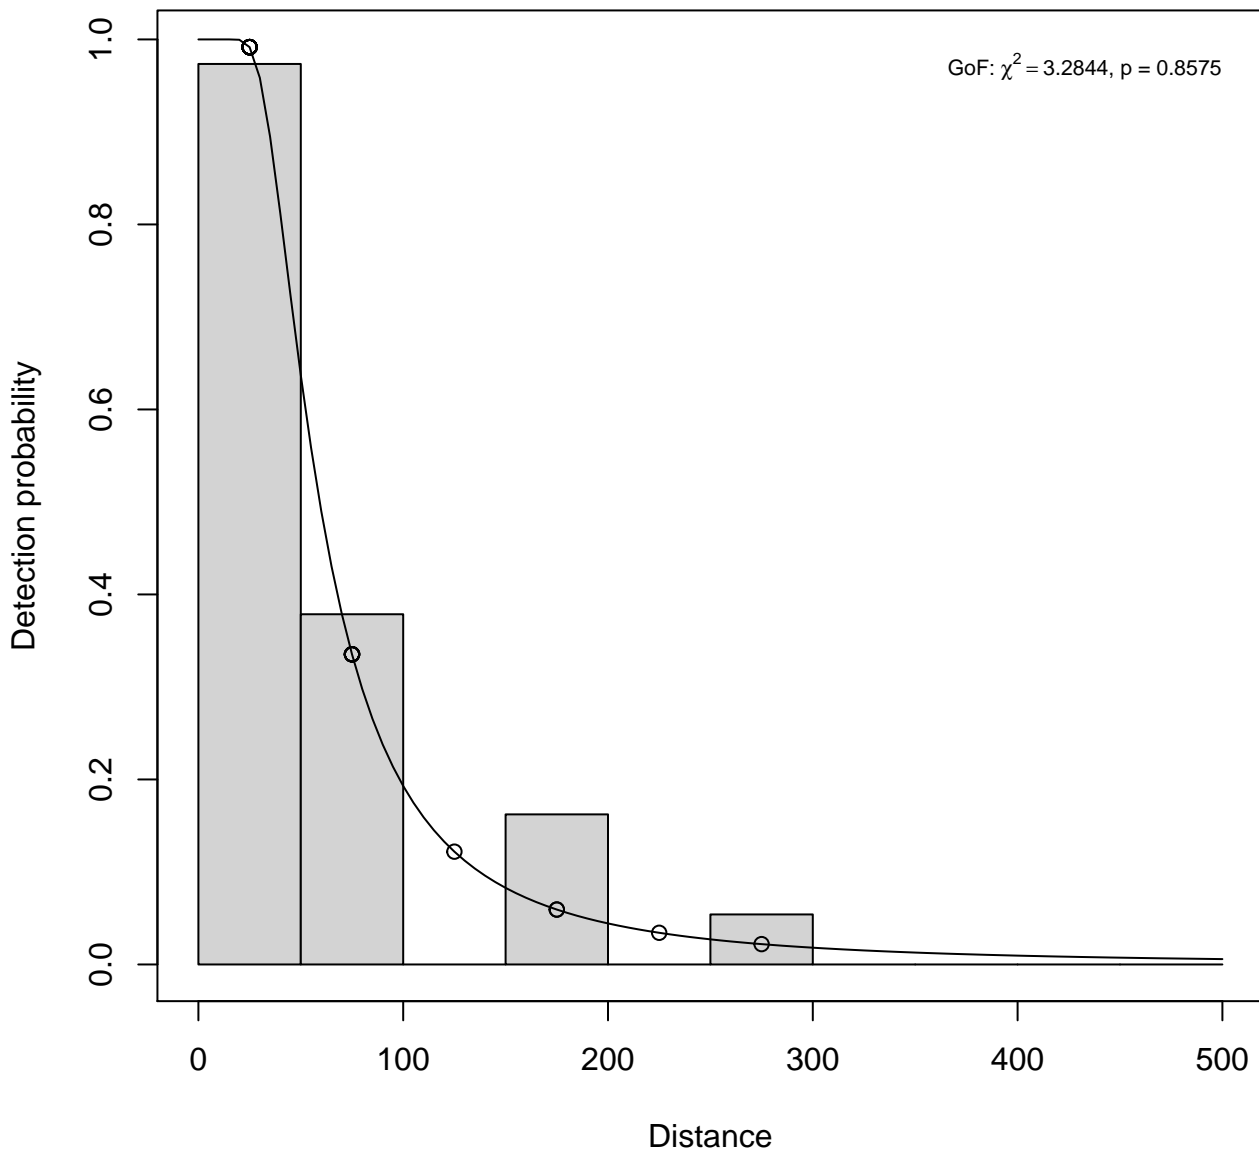

Brotogeris jugularis – Choco–Darian moist forests – Colombia (N = 29, key function = hr)

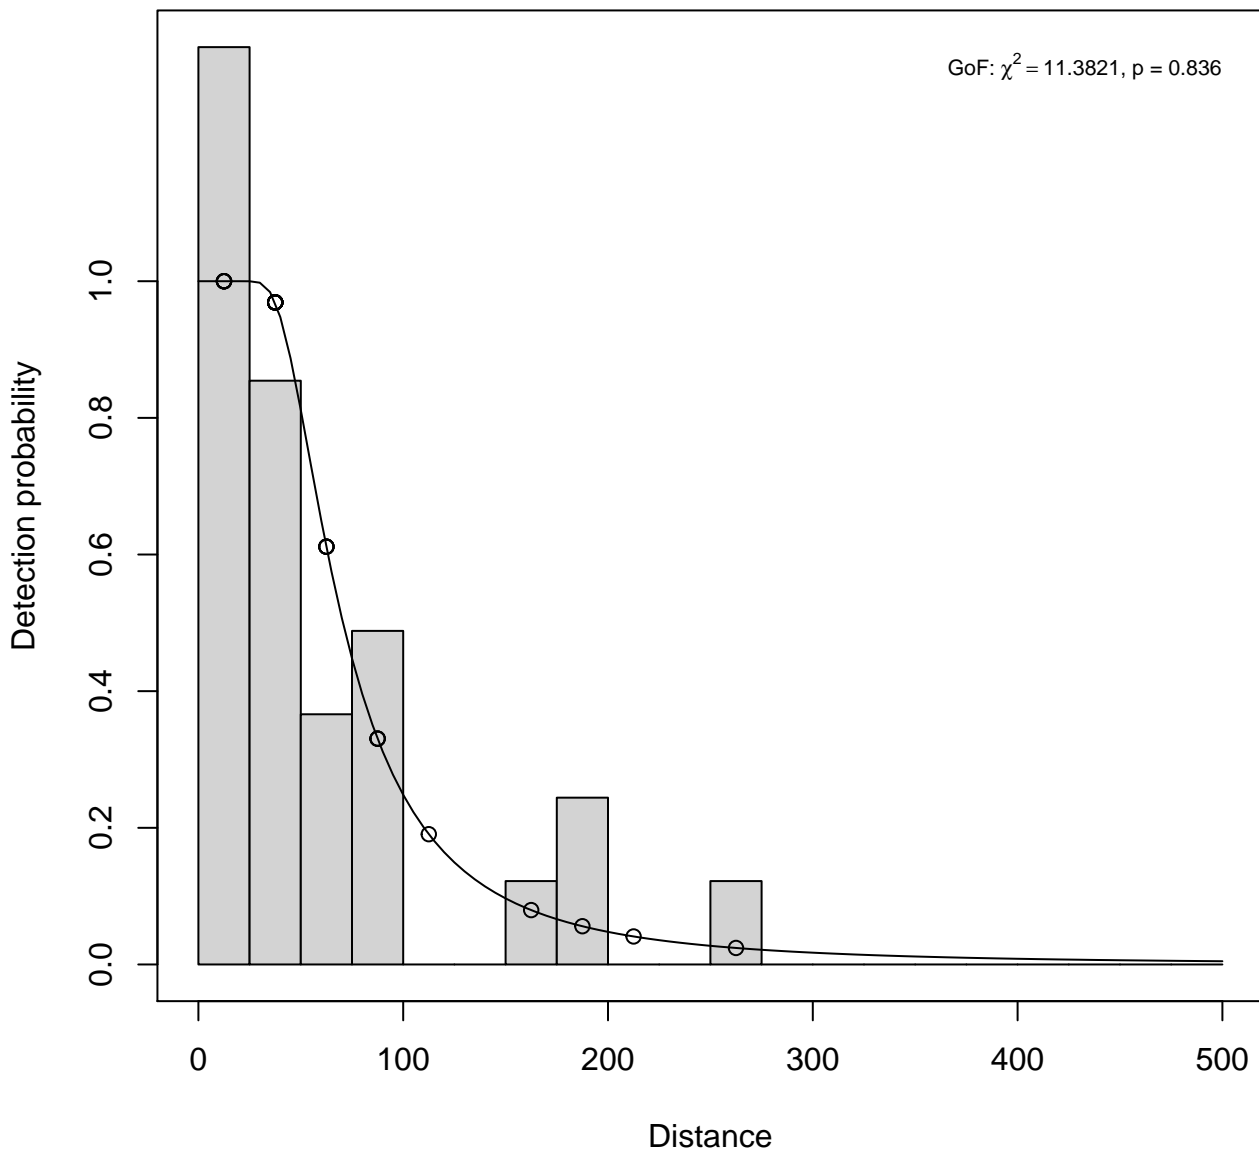

*Brotogeris jugularis* – Choco–Darian moist forests – Colombia (N = 29, key function = hr)

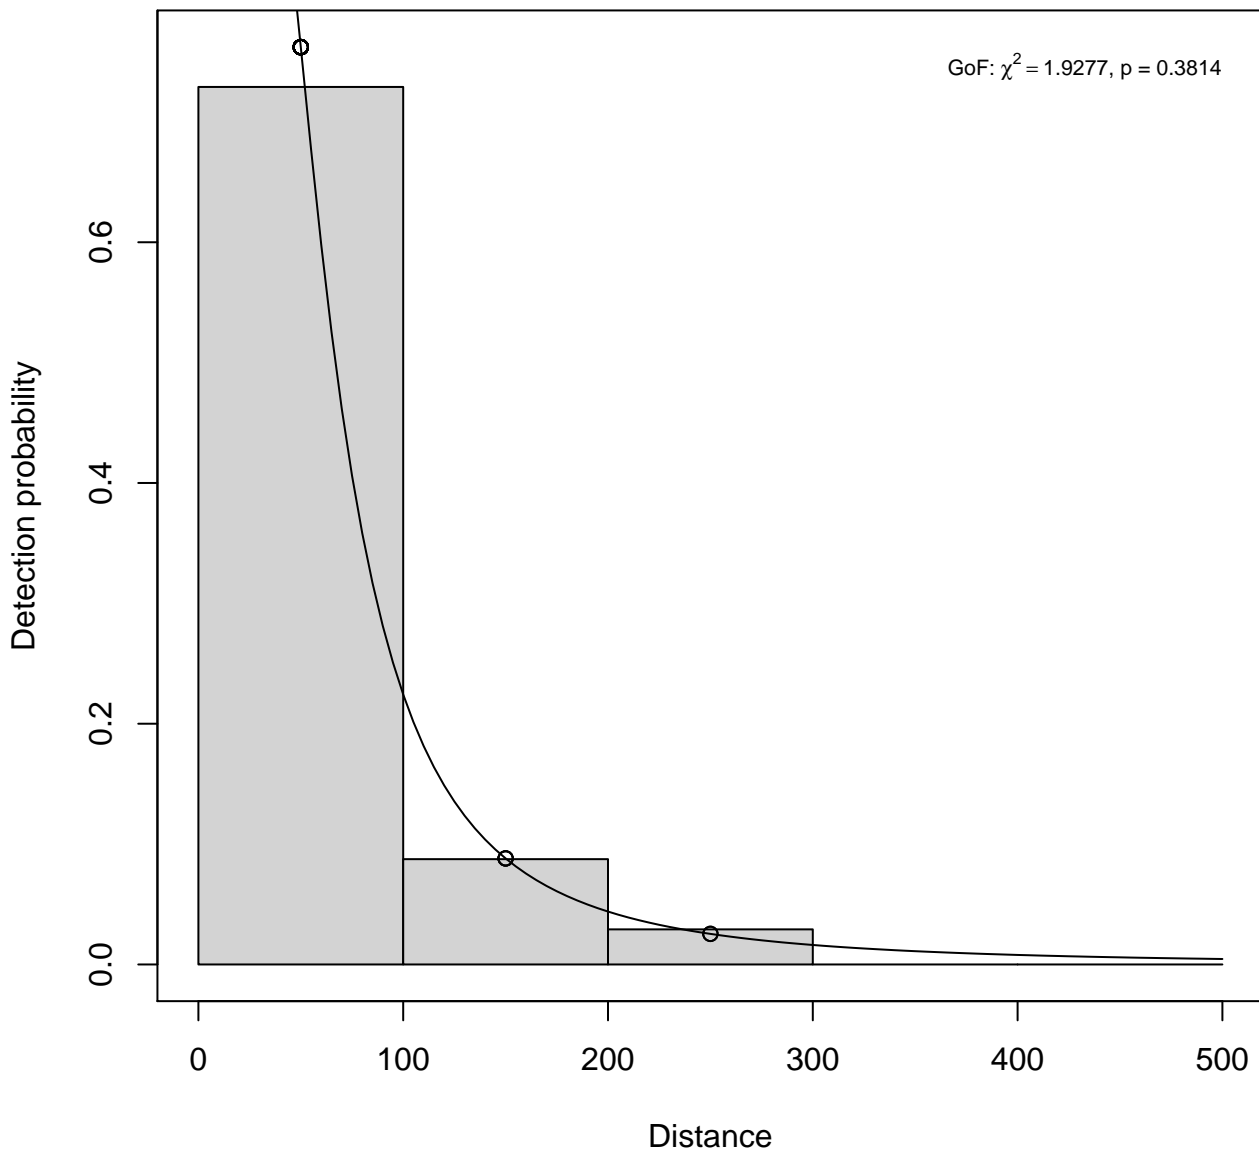

Supplement: s1 [file s1]
