# Supplementary material
Source: MDPI journal article supplement (https://www.mdpi.com/1424-2818/13/7/300)

# Psittacara wagleri – Cauca Valley dry forests – Colombia

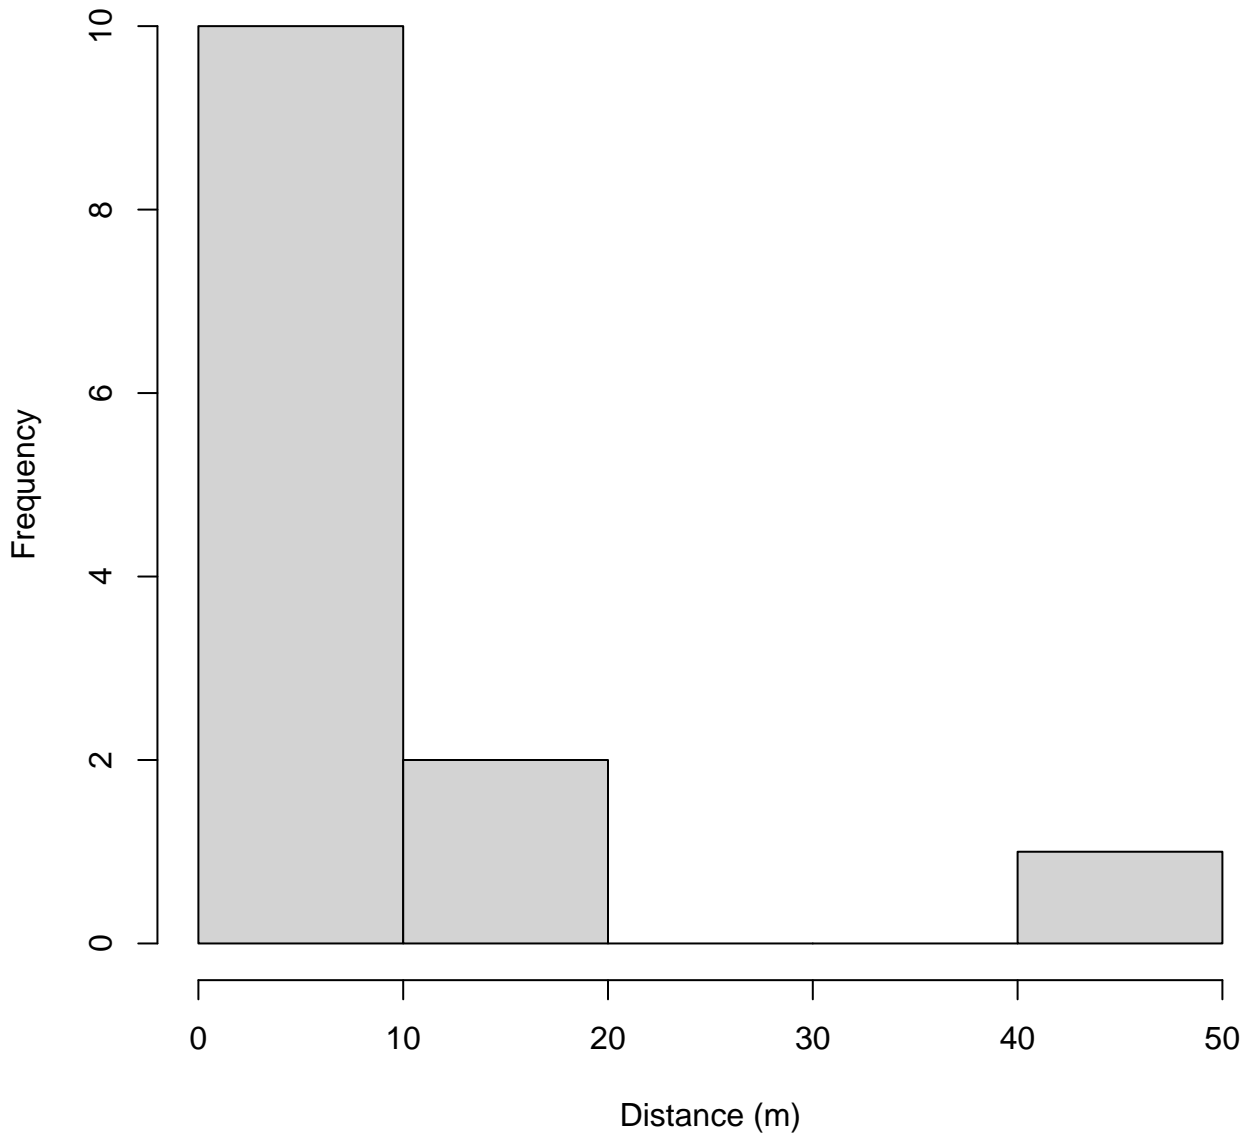

# Psittacara wagleri – Cauca Valley dry forests – Colombia

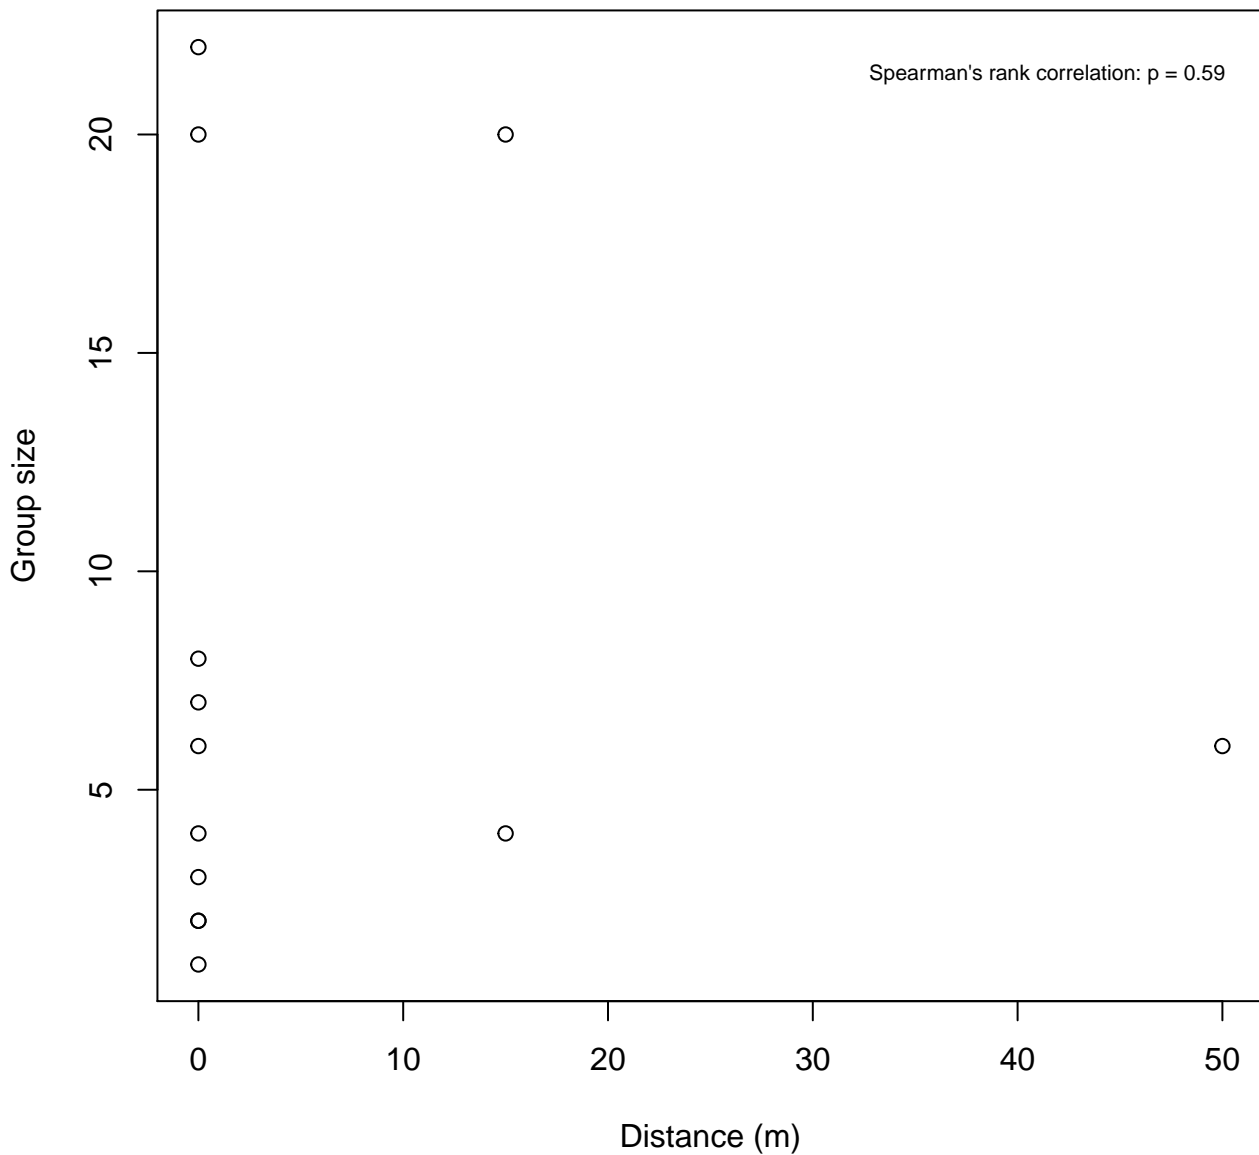

*Psittacara wagleri* – Cauca Valley dry forests – Colombia (N = 13, key function = hn)

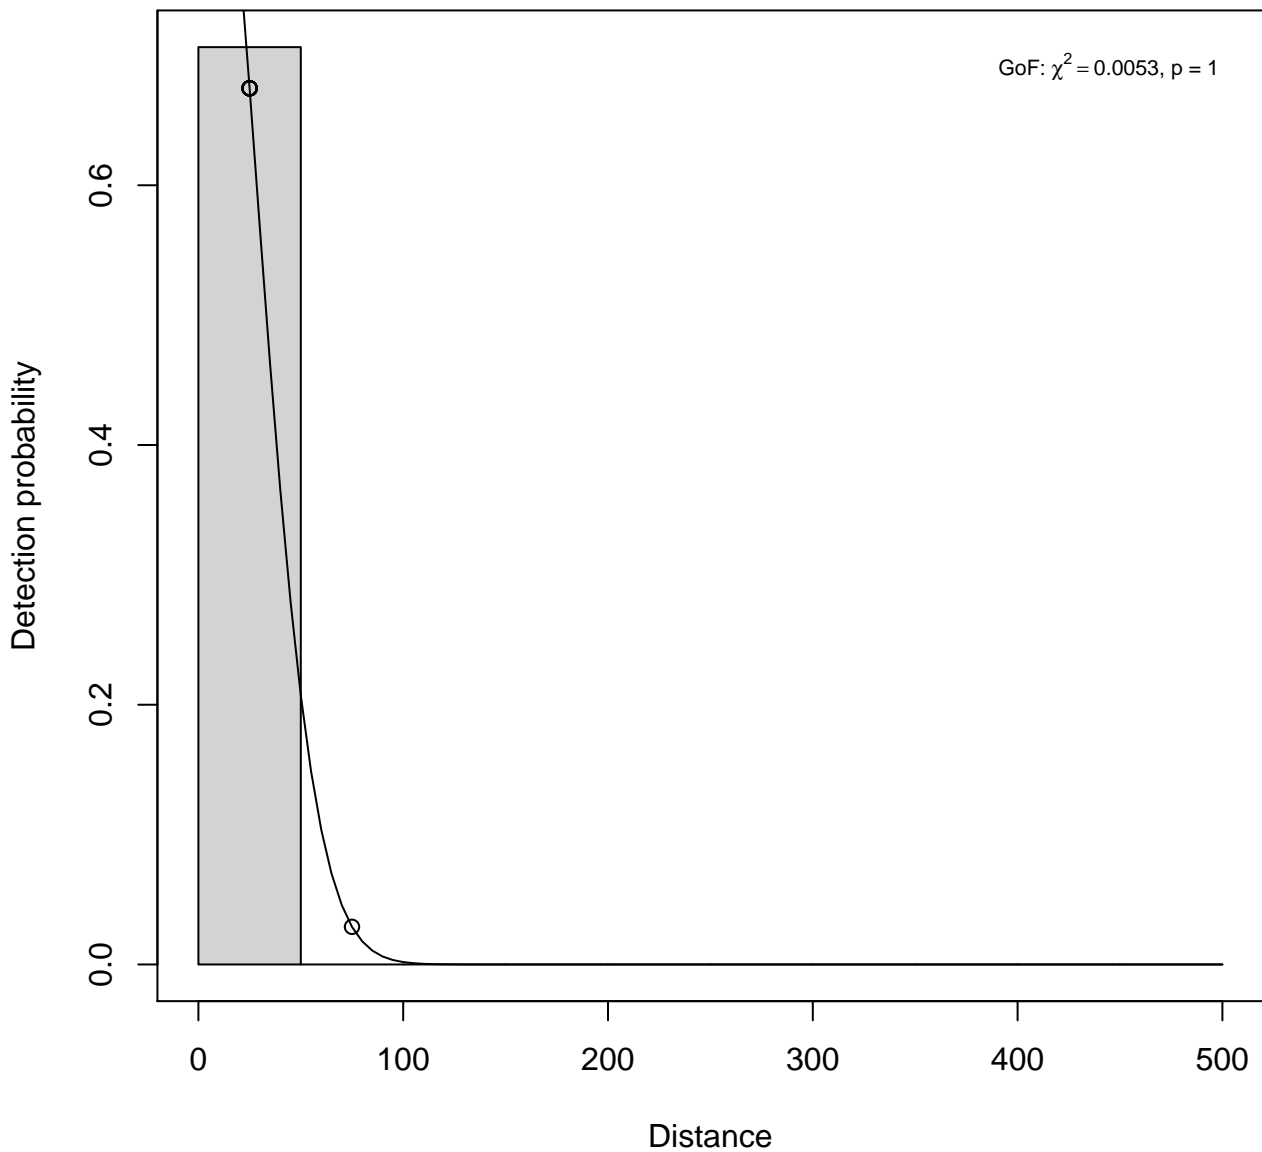

GoF:  $\chi^2 = \text{NA}$ , p = NA

*Psittacara wagleri* – Cauca Valley dry forests – Colombia (N = 13, key function = hr)

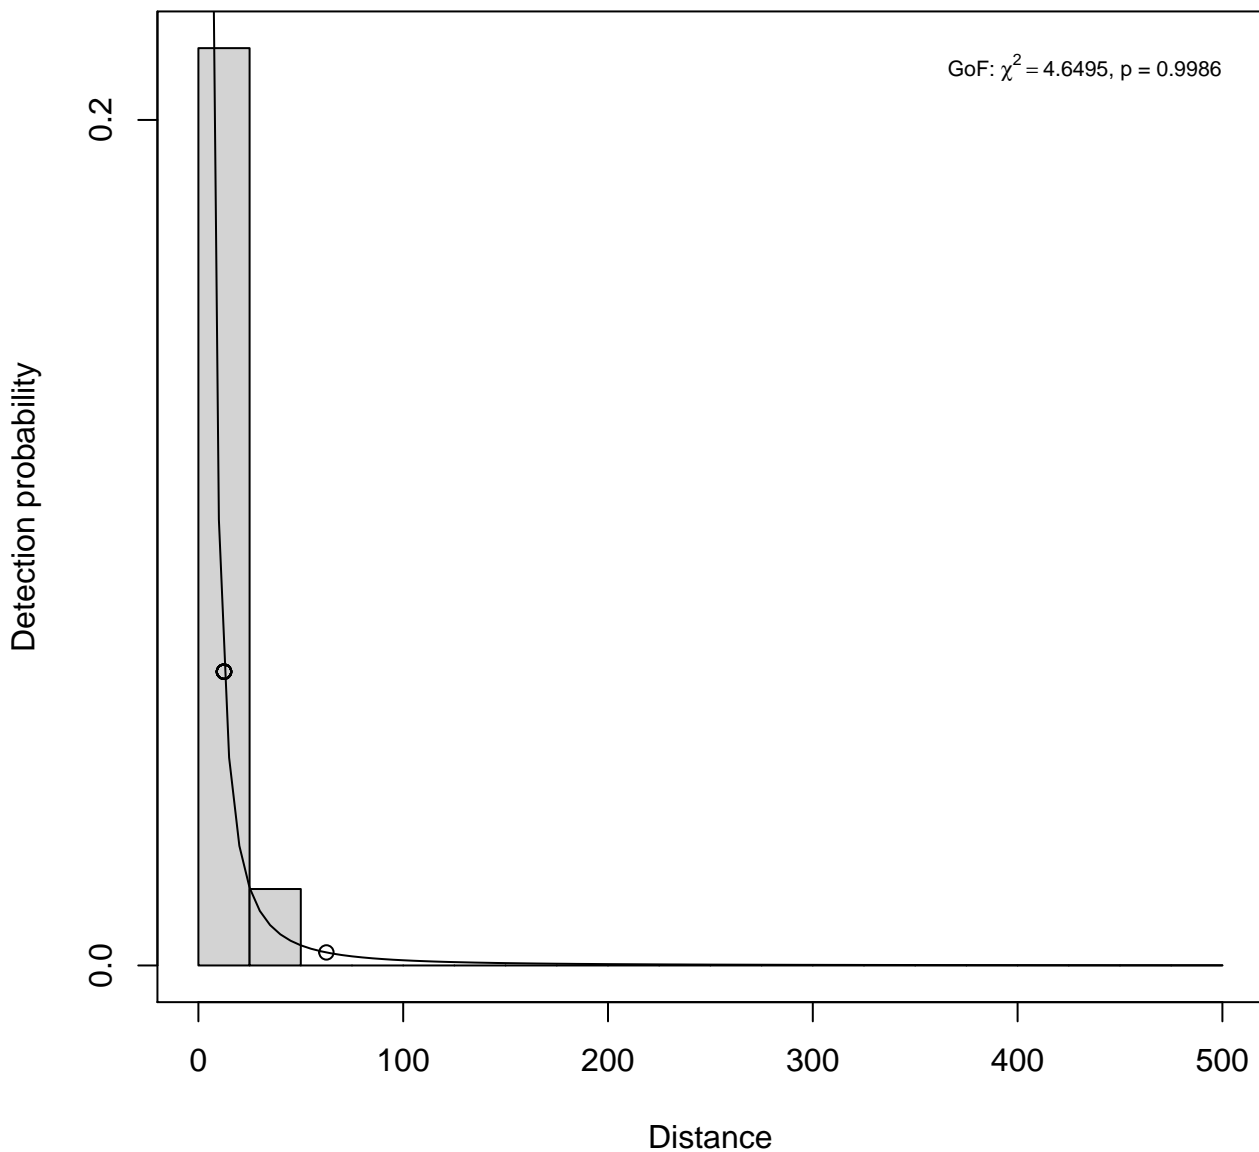

Supplement: s1 [file s1]
