# Supplementary material
Source: MDPI journal article supplement (https://www.mdpi.com/1424-2818/13/7/300)

# ***Eupsittula pertinax* – Sinu Valley dry forests – Colombia**

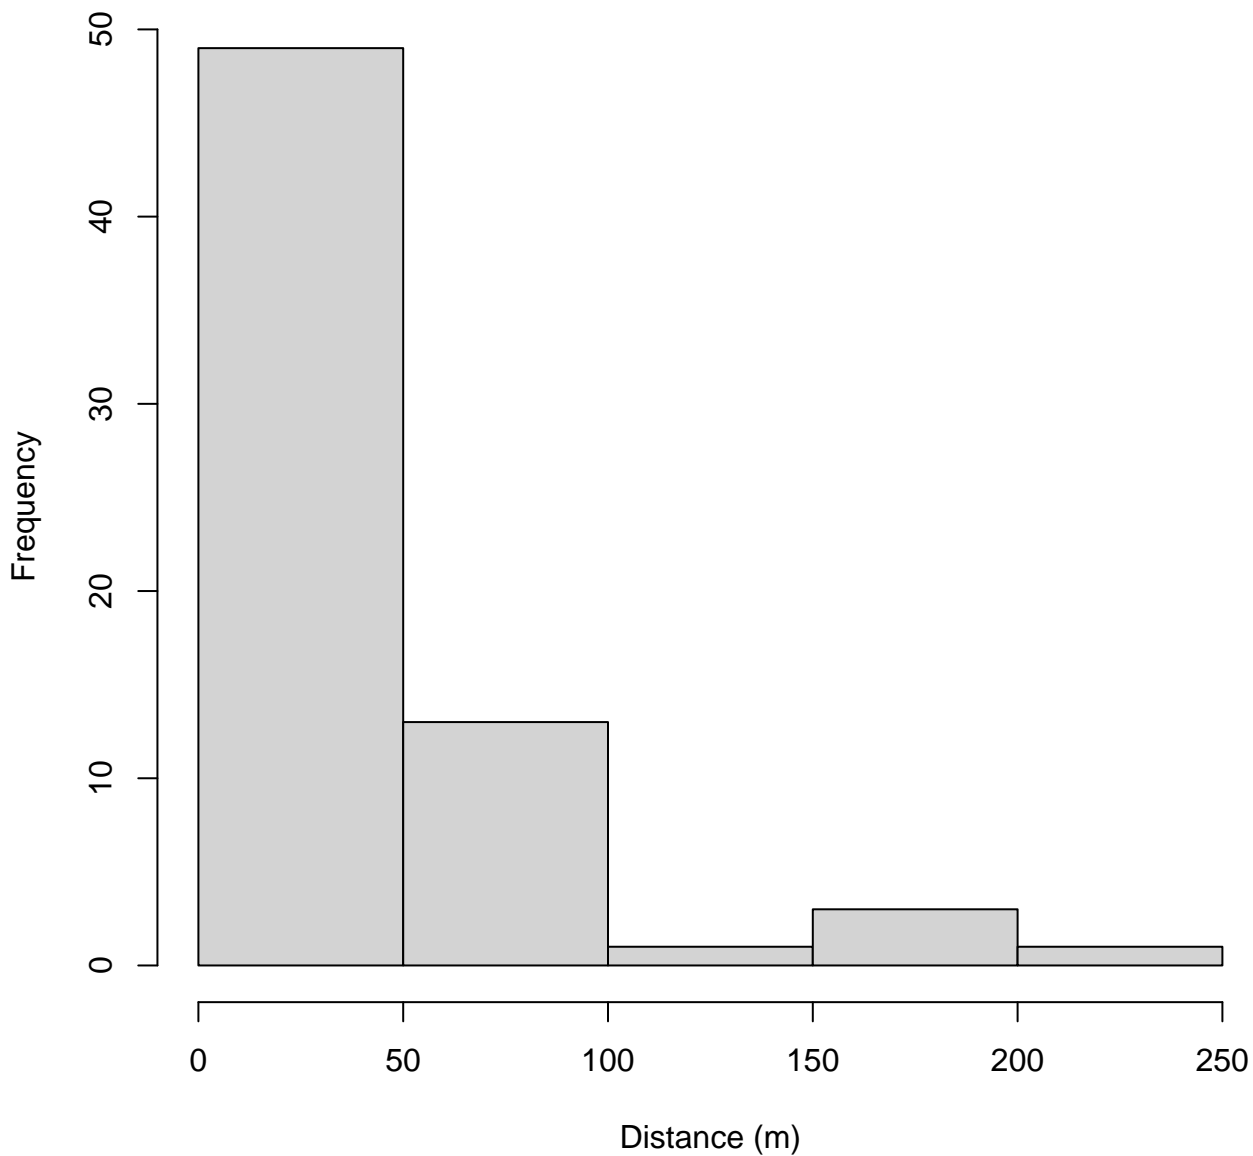

# ***Eupsittula pertinax* – Sinu Valley dry forests – Colombia**

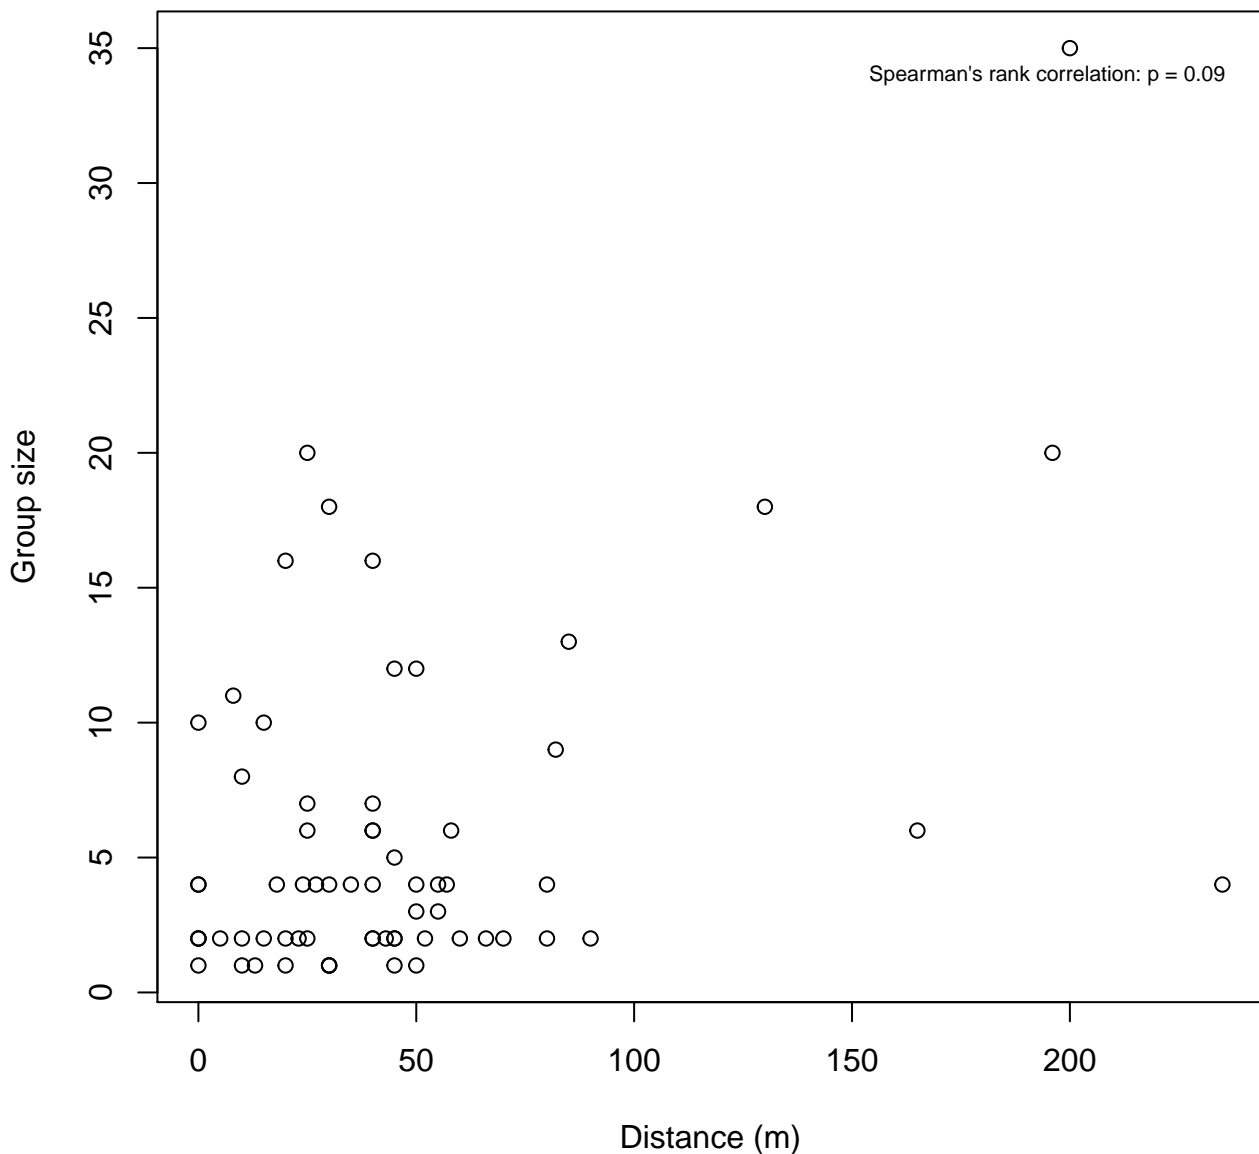

*Eupsittula pertinax* – Sinu Valley dry forests – Colombia (N = 67, key function = hr)

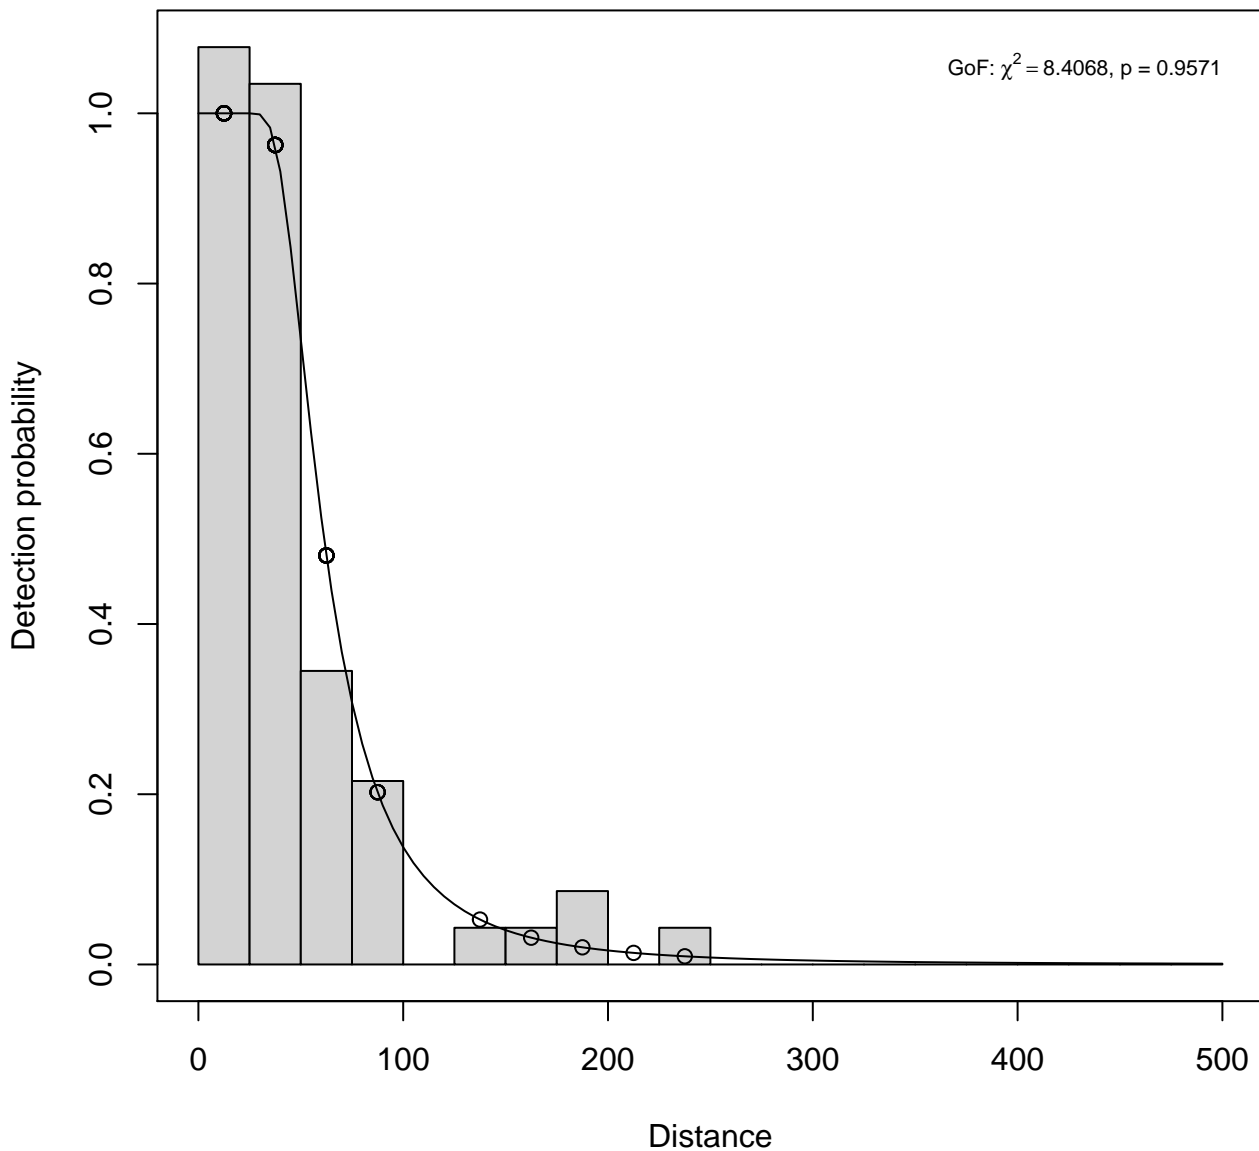

Eupsittula pertinax – Sinu Valley dry forests – Colombia (N = 67, key function = hr)

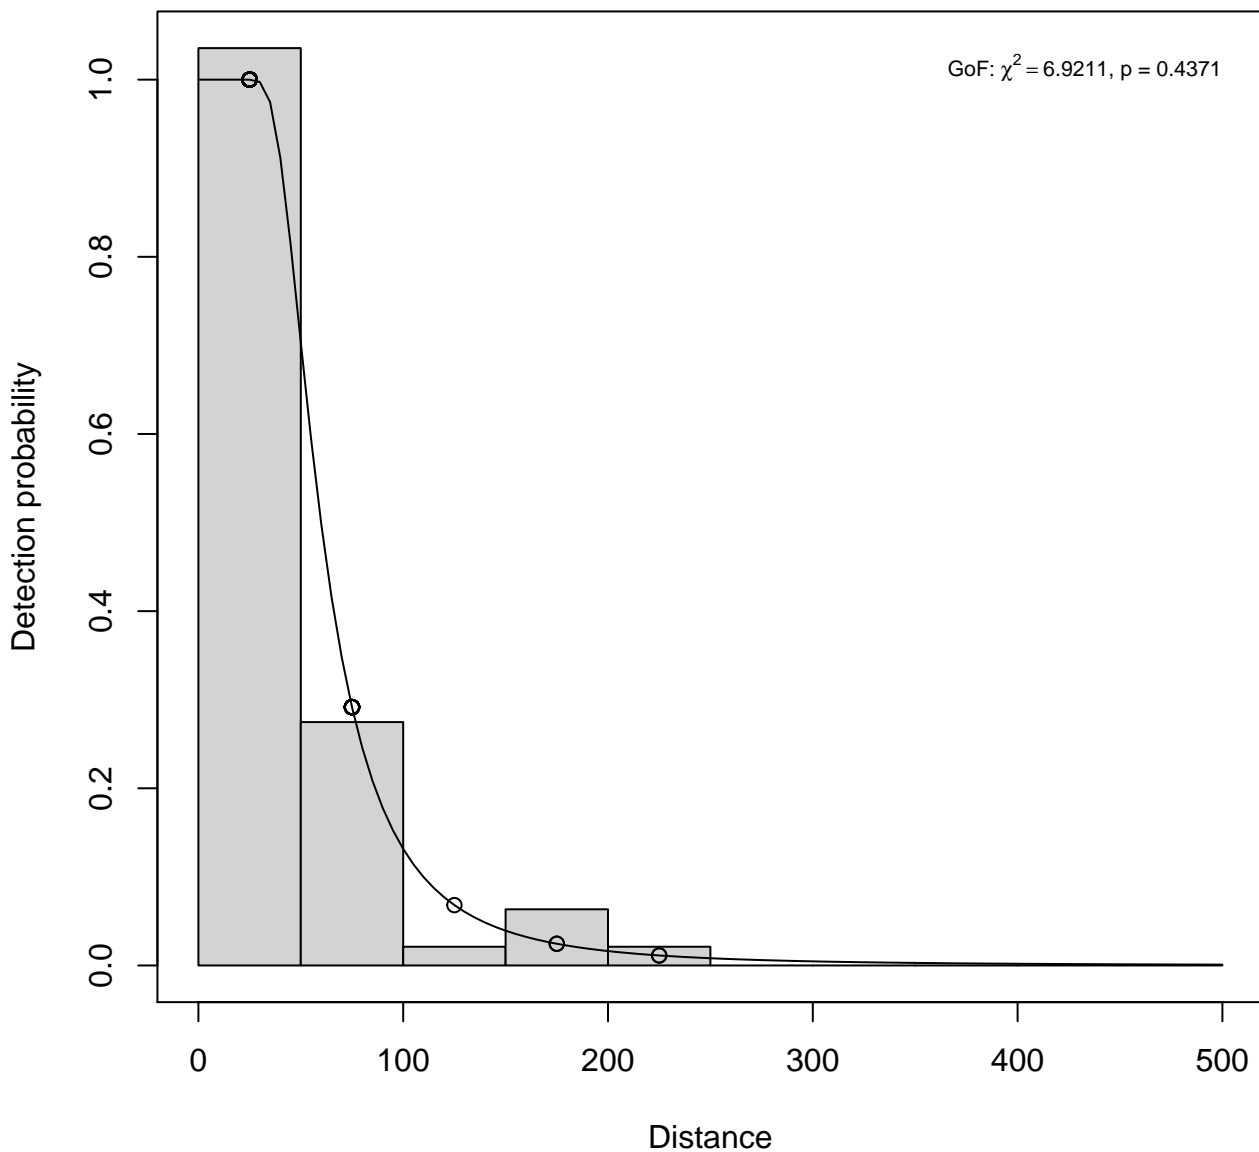

Eupsittula pertinax – Sinu Valley dry forests – Colombia (N = 67, key function = hr)

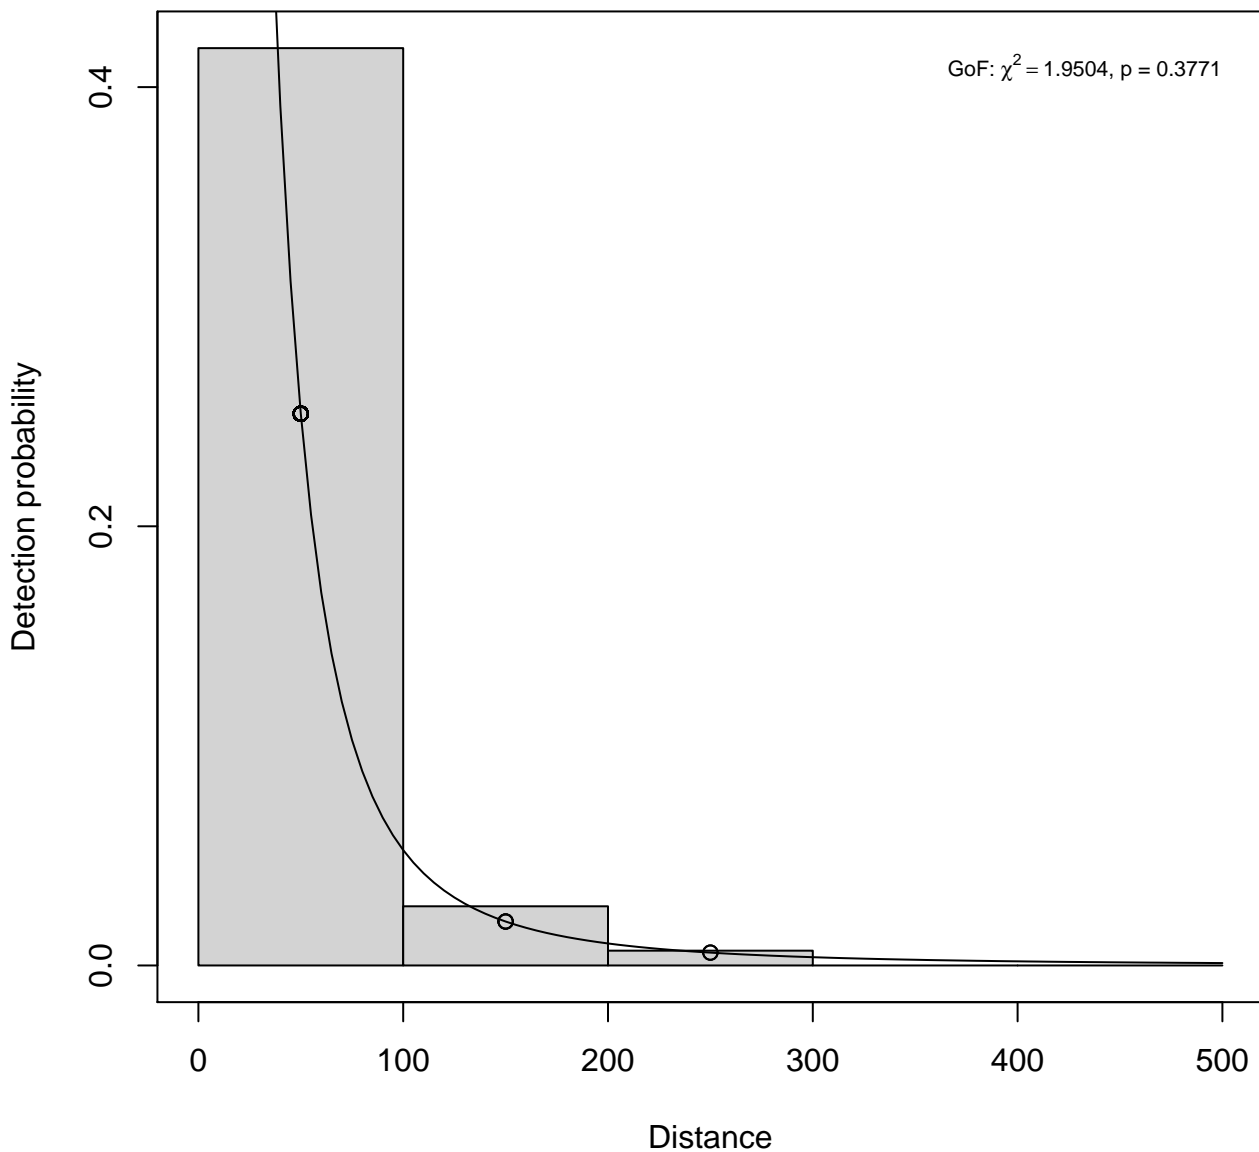

Supplement: s1 [file s1]
