# Supplementary material
Source: MDPI journal article supplement (https://www.mdpi.com/1424-2818/13/7/300)

# Amazona amazonica – Magdalena–Uraba moist forests – Colombia

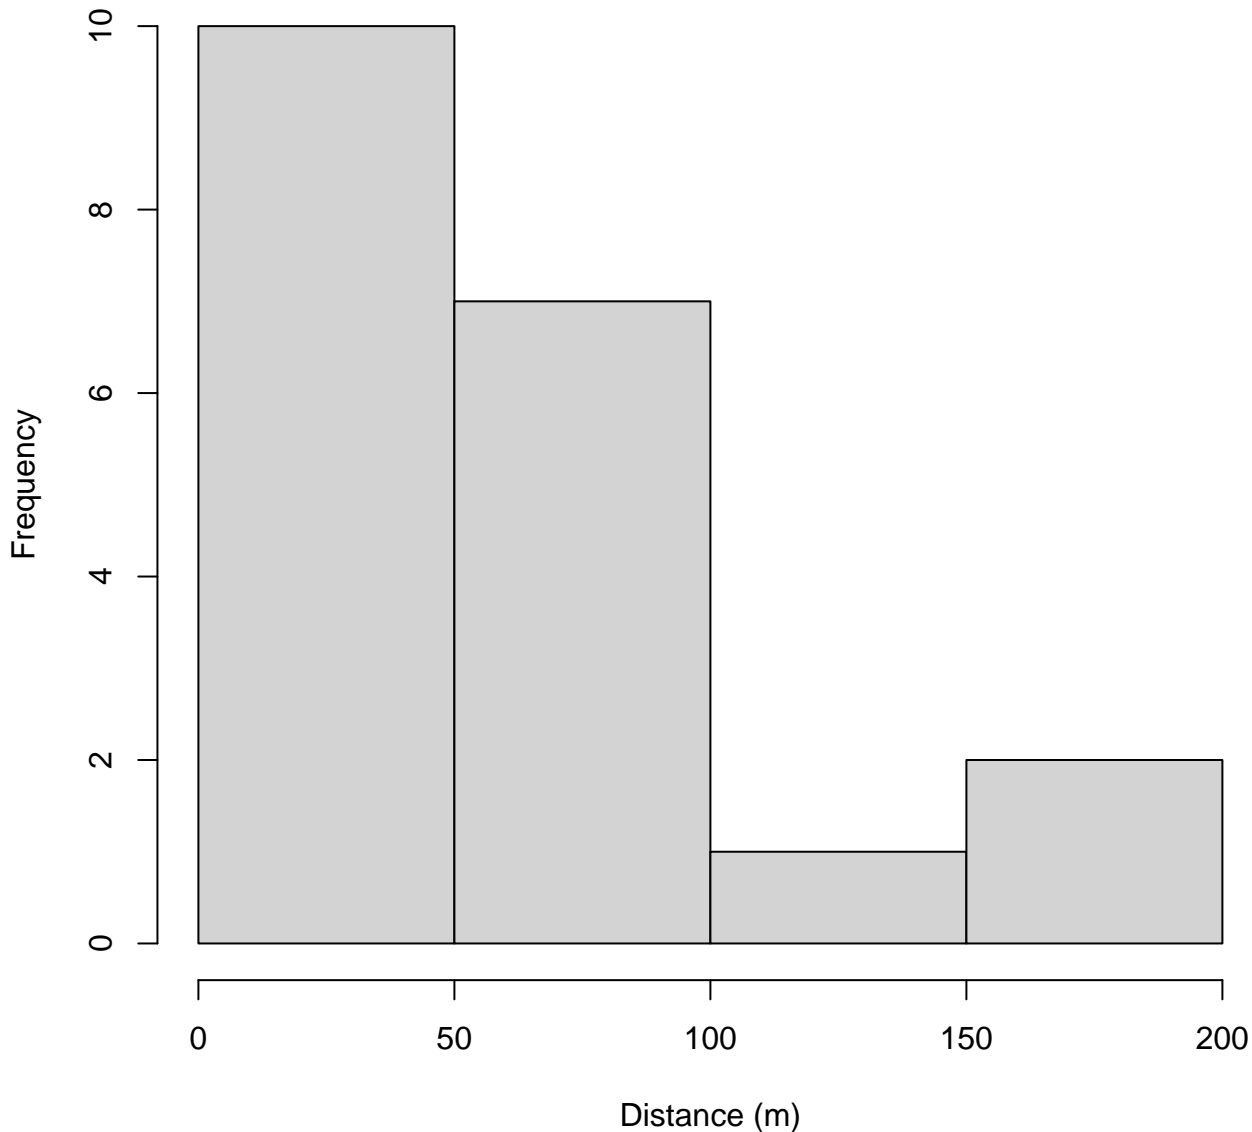

# Amazona amazonica – Magdalena–Uraba moist forests – Colombia

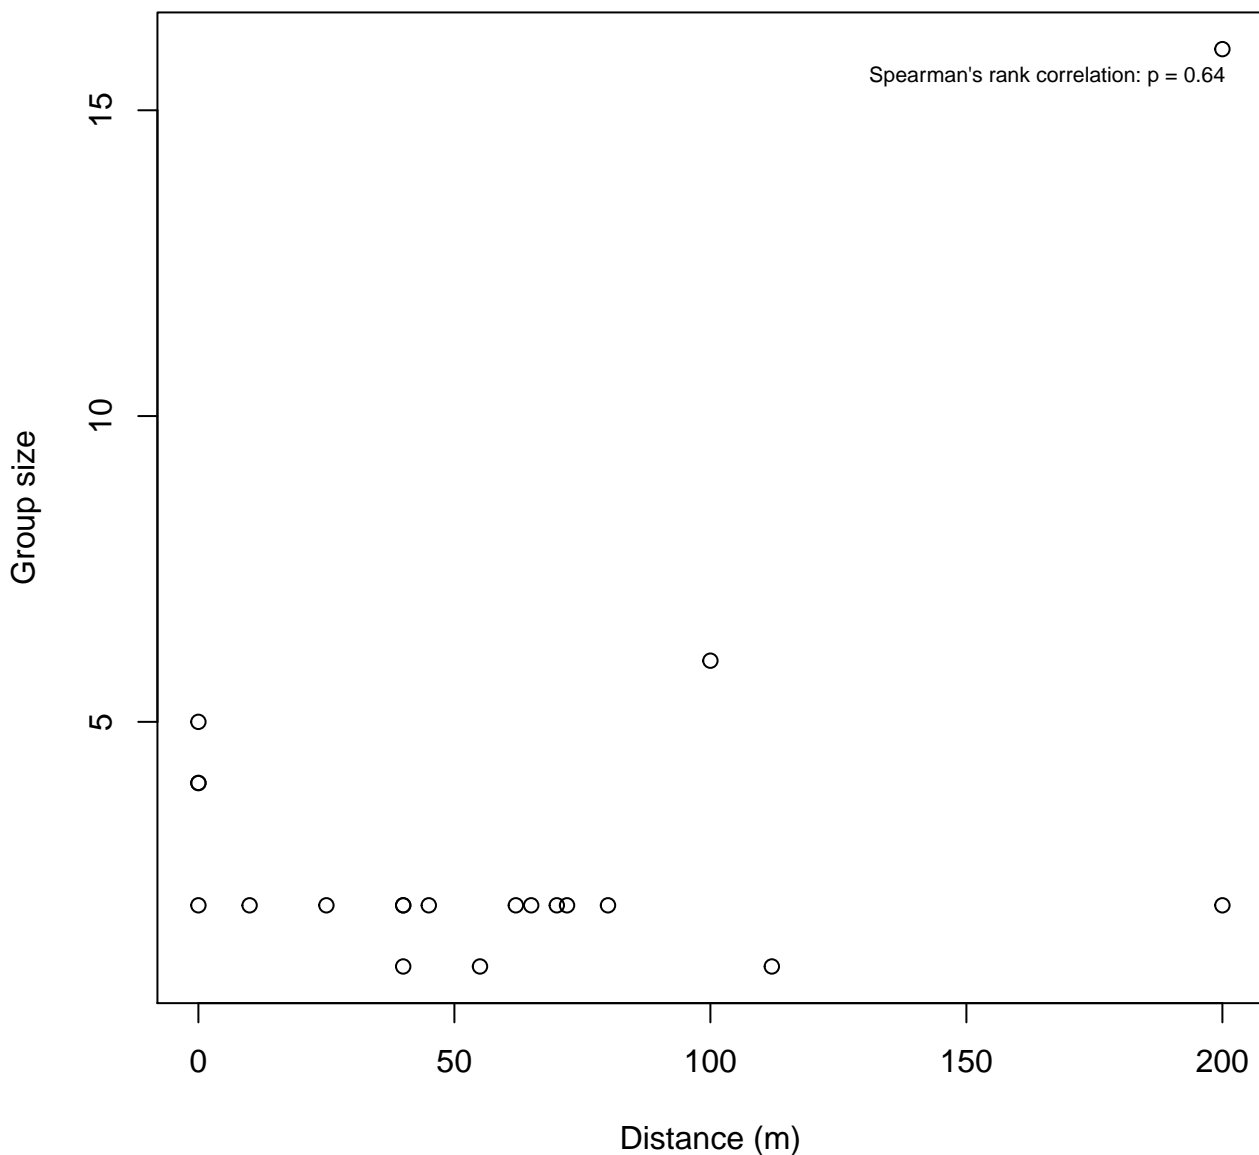

Amazona amazonica – Magdalena–Uraba moist forests – Colombia (N = 20, key function = hn)

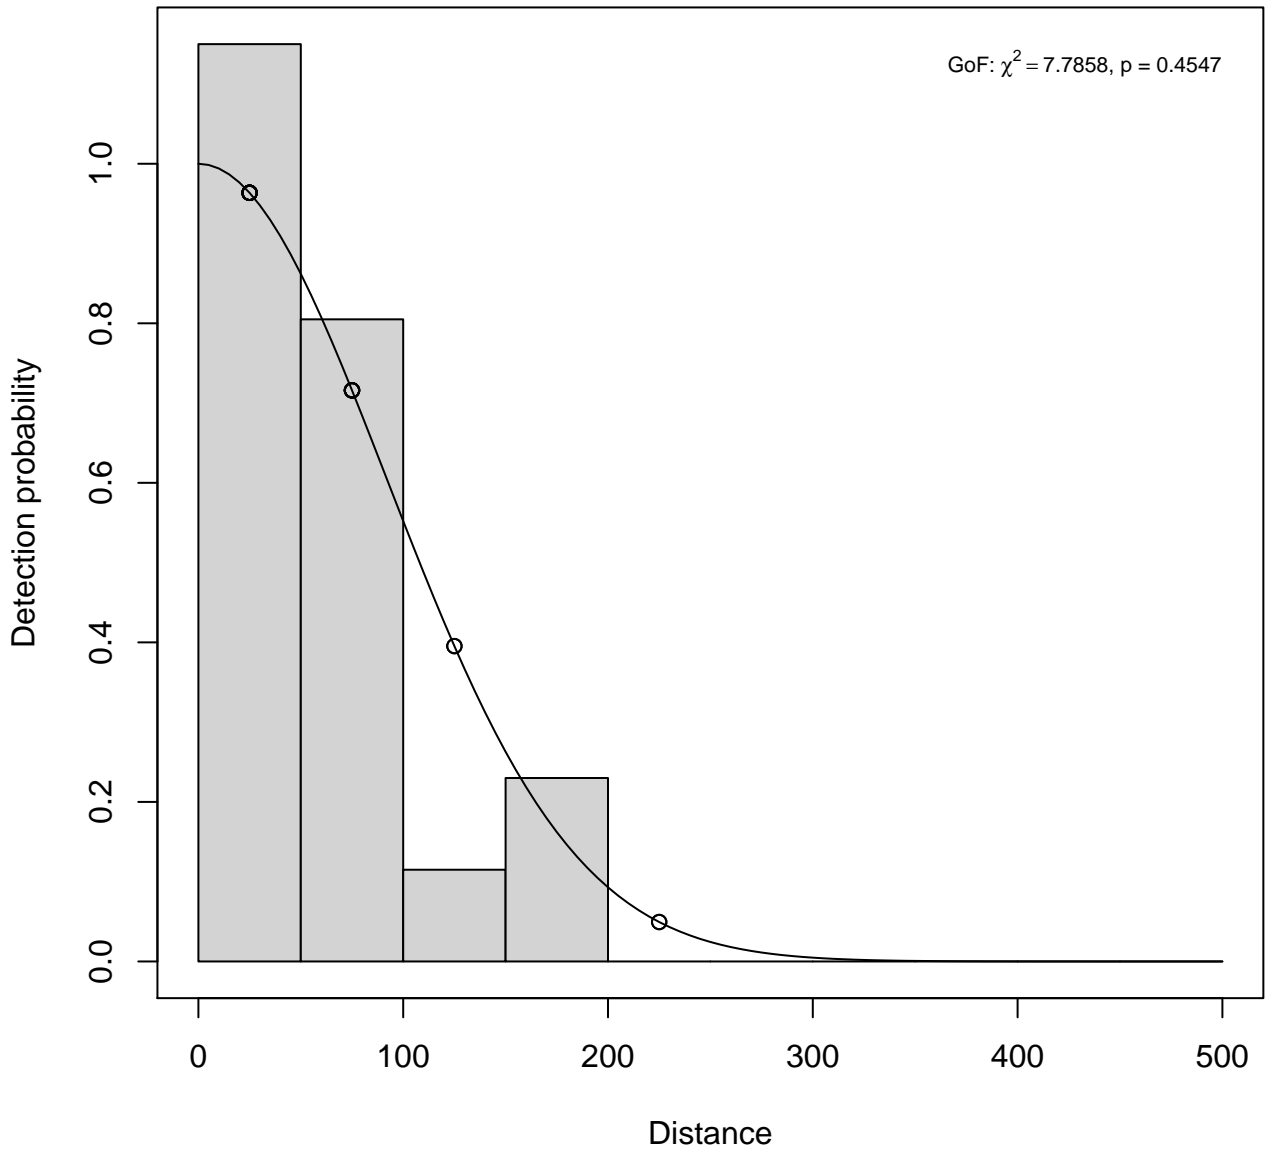

Amazona amazonica – Magdalena–Uraba moist forests – Colombia (N = 20, key function = hn)

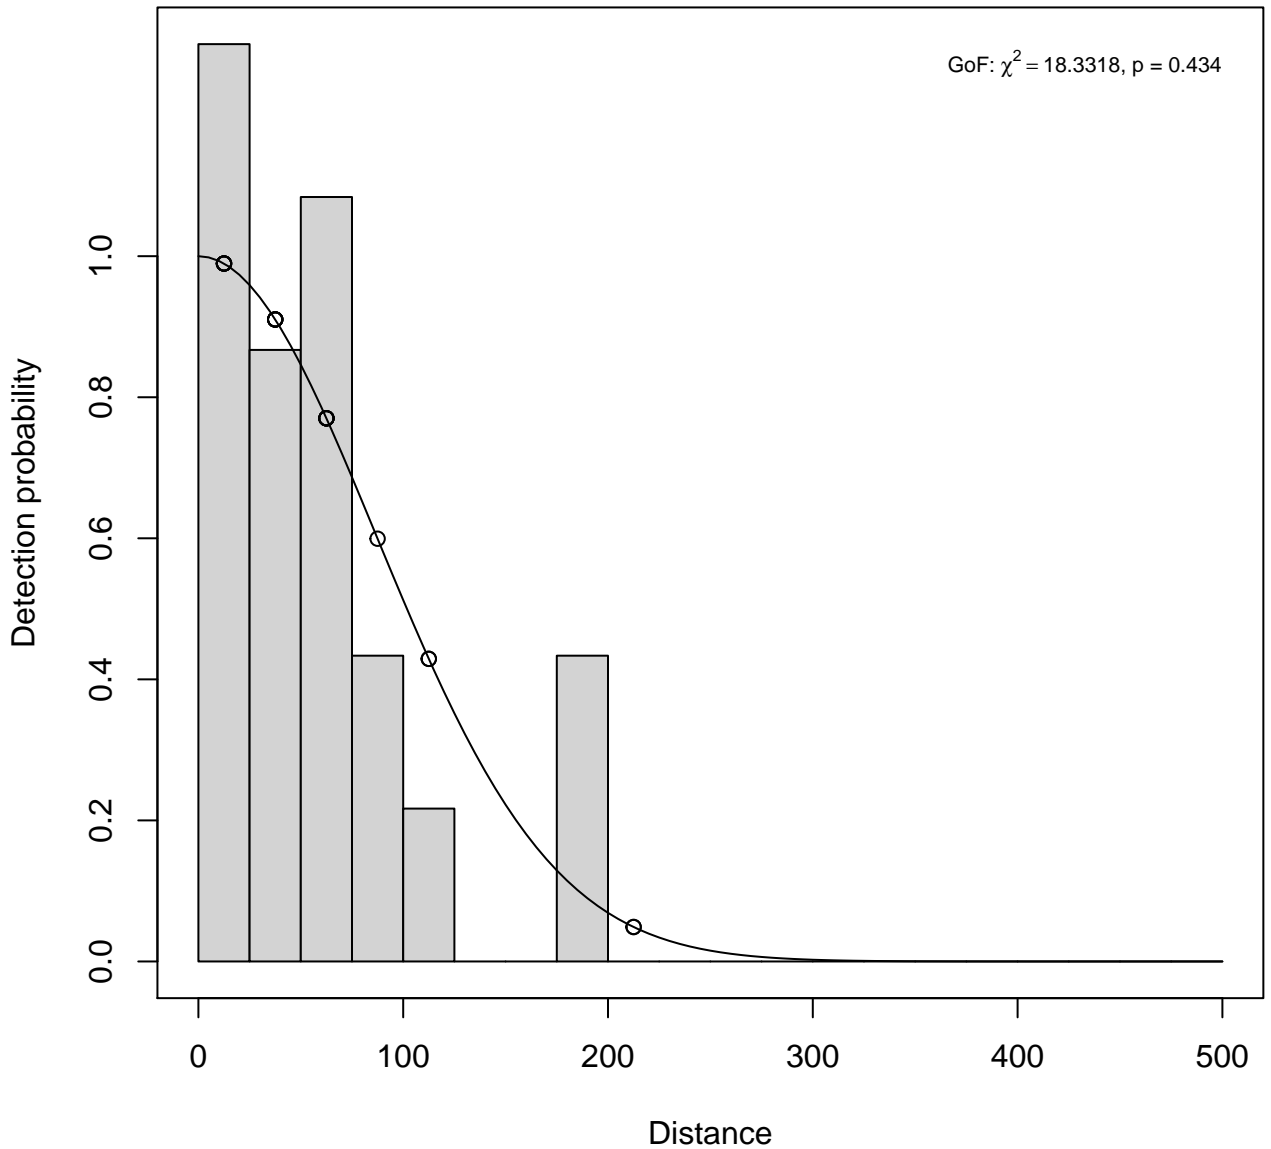

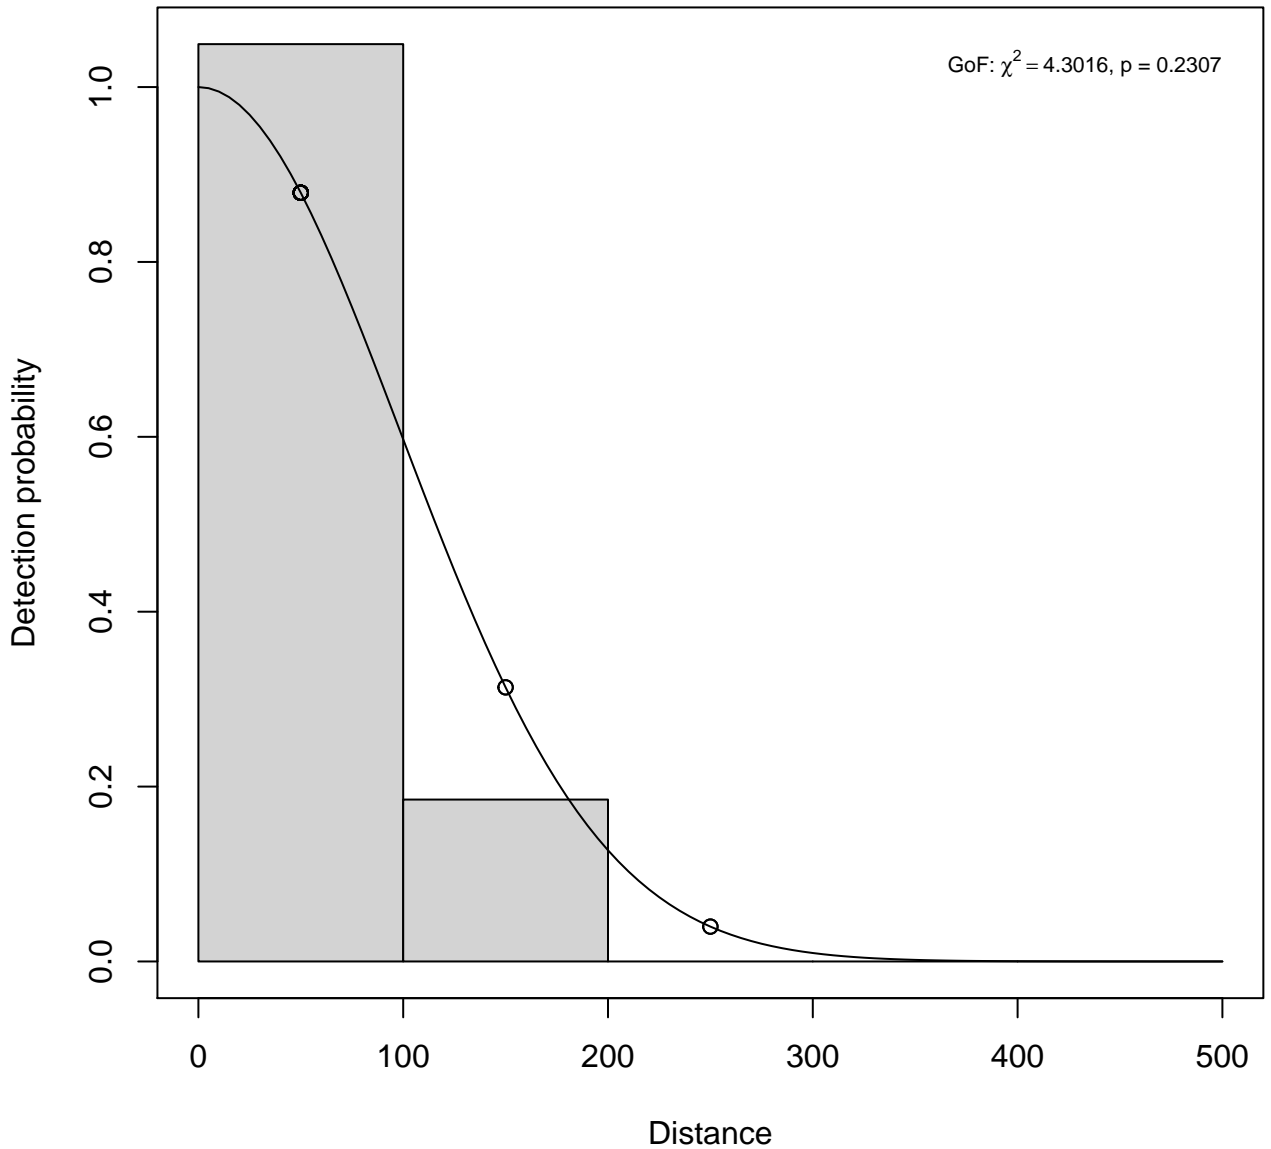

Supplement: s1 [file s1]
