# Supplementary material
Source: MDPI journal article supplement (https://www.mdpi.com/1424-2818/13/7/300)

# **Myiopsitta monachus – Alto Parana Atlantic forests – Paraguay**

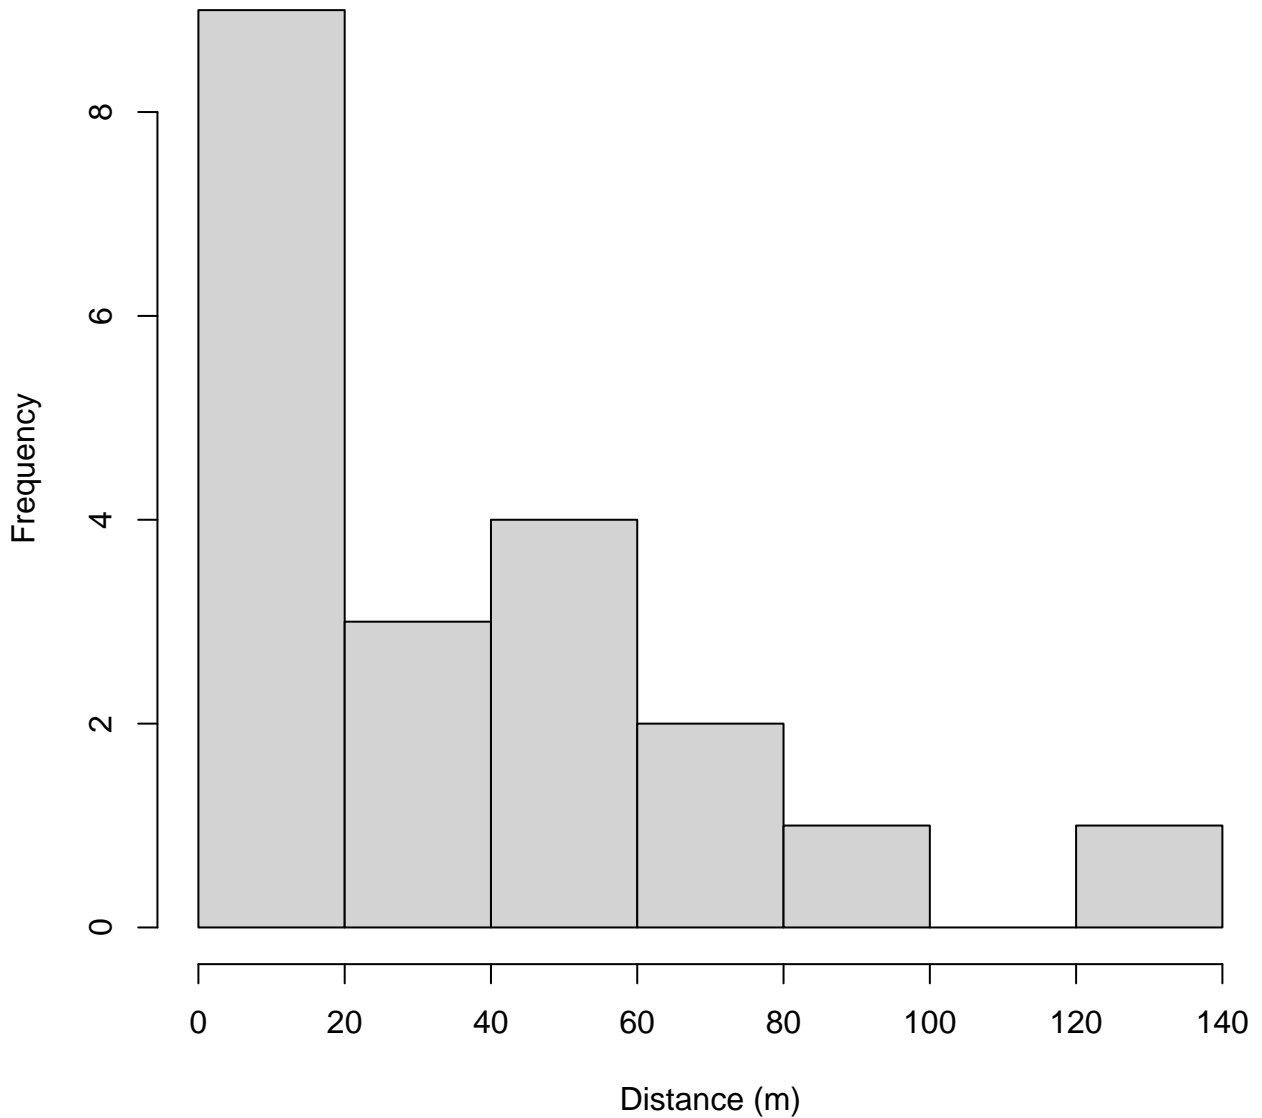

# Myiopsitta monachus – Alto Parana Atlantic forests – Paraguay

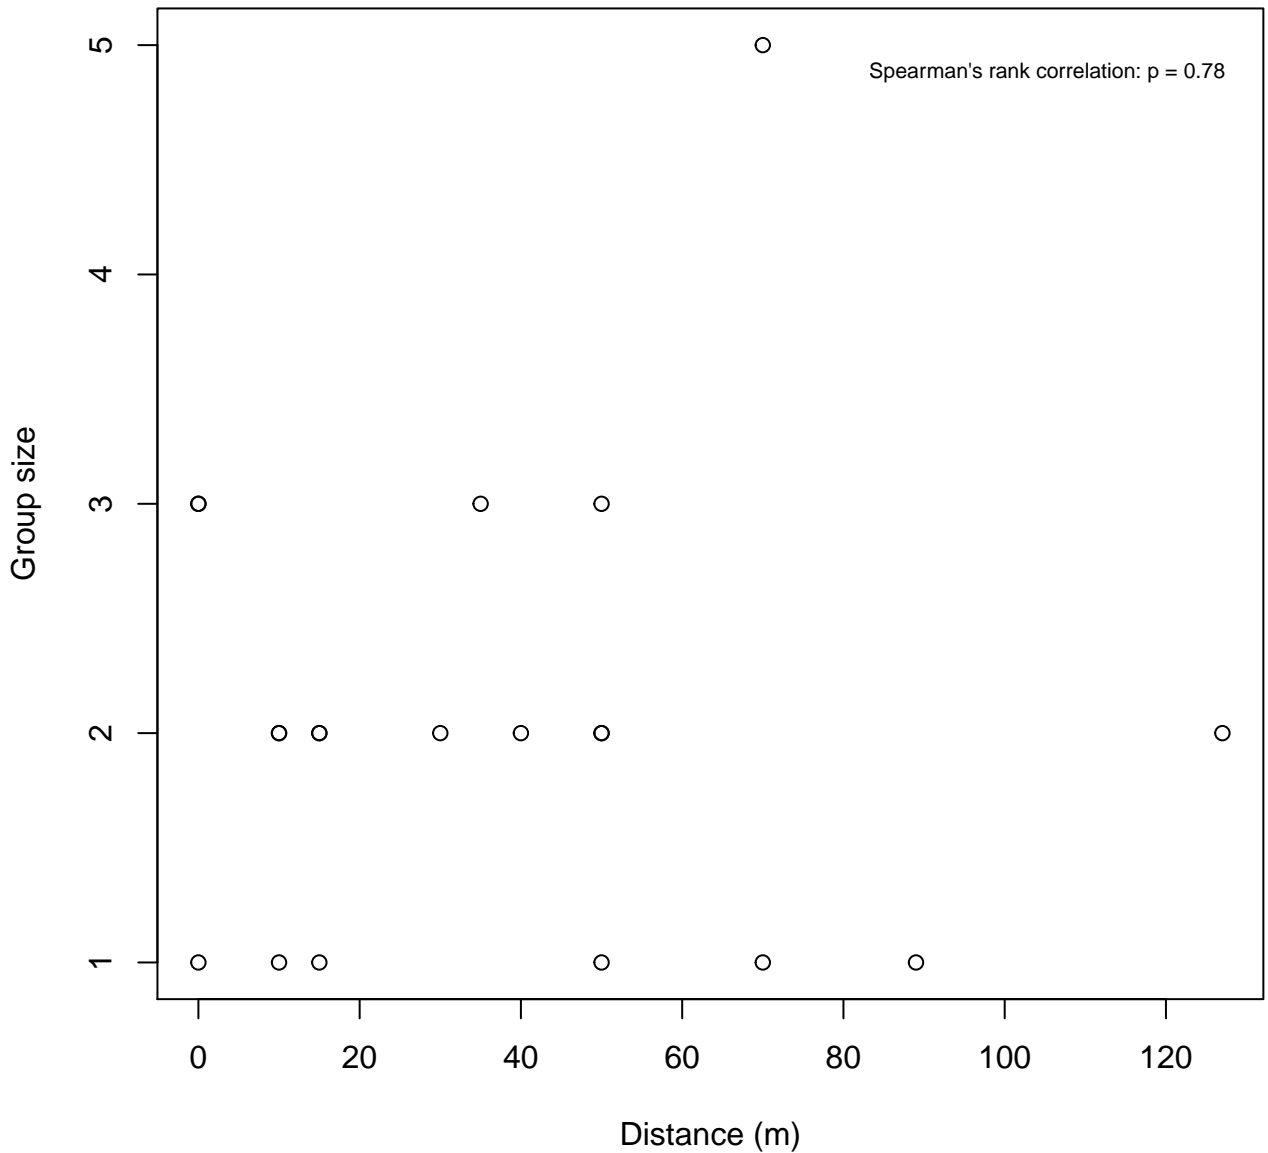

*Myiopsitta monachus* – Alto Parana Atlantic forests – Paraguay (N = 20, key function = hn)

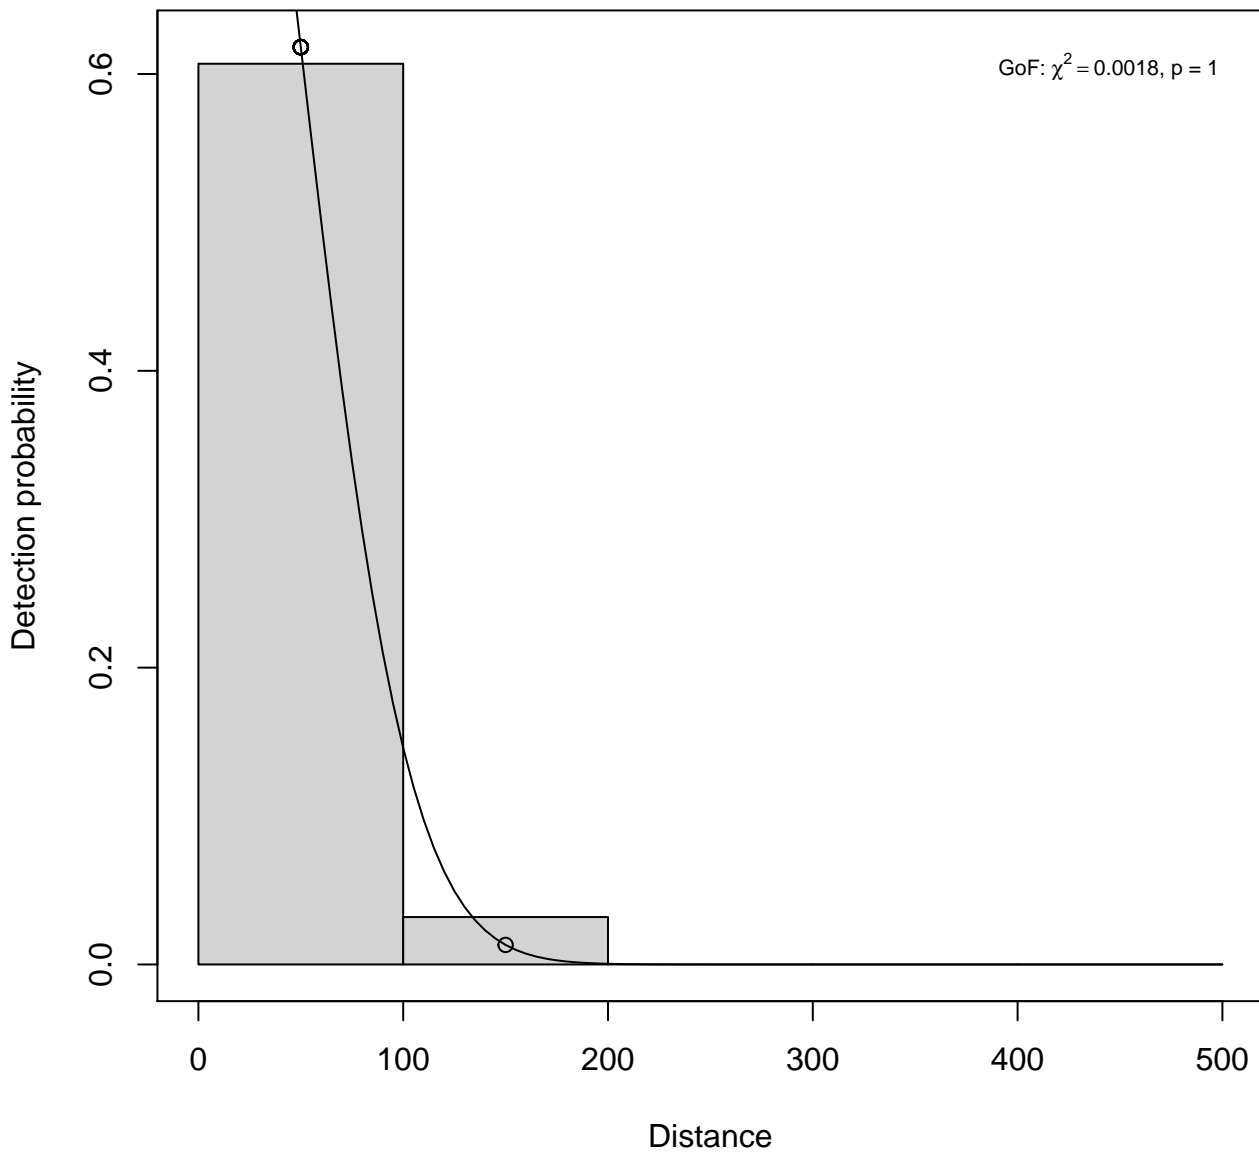

*Myiopsitta monachus* – Alto Parana Atlantic forests – Paraguay (N = 20, key function = hn)

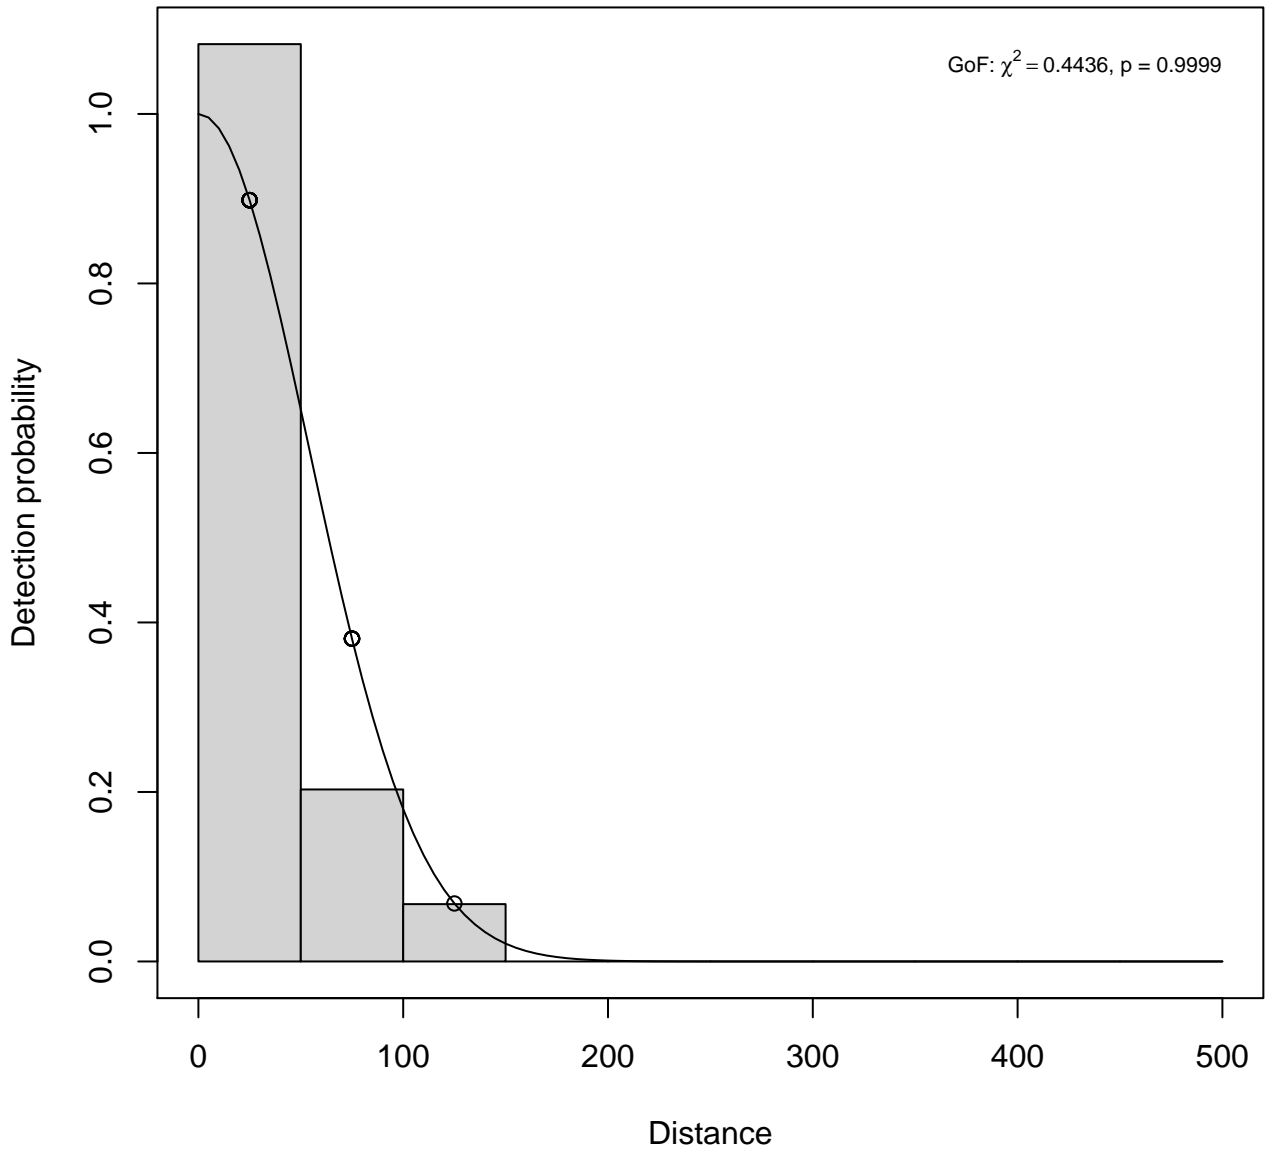

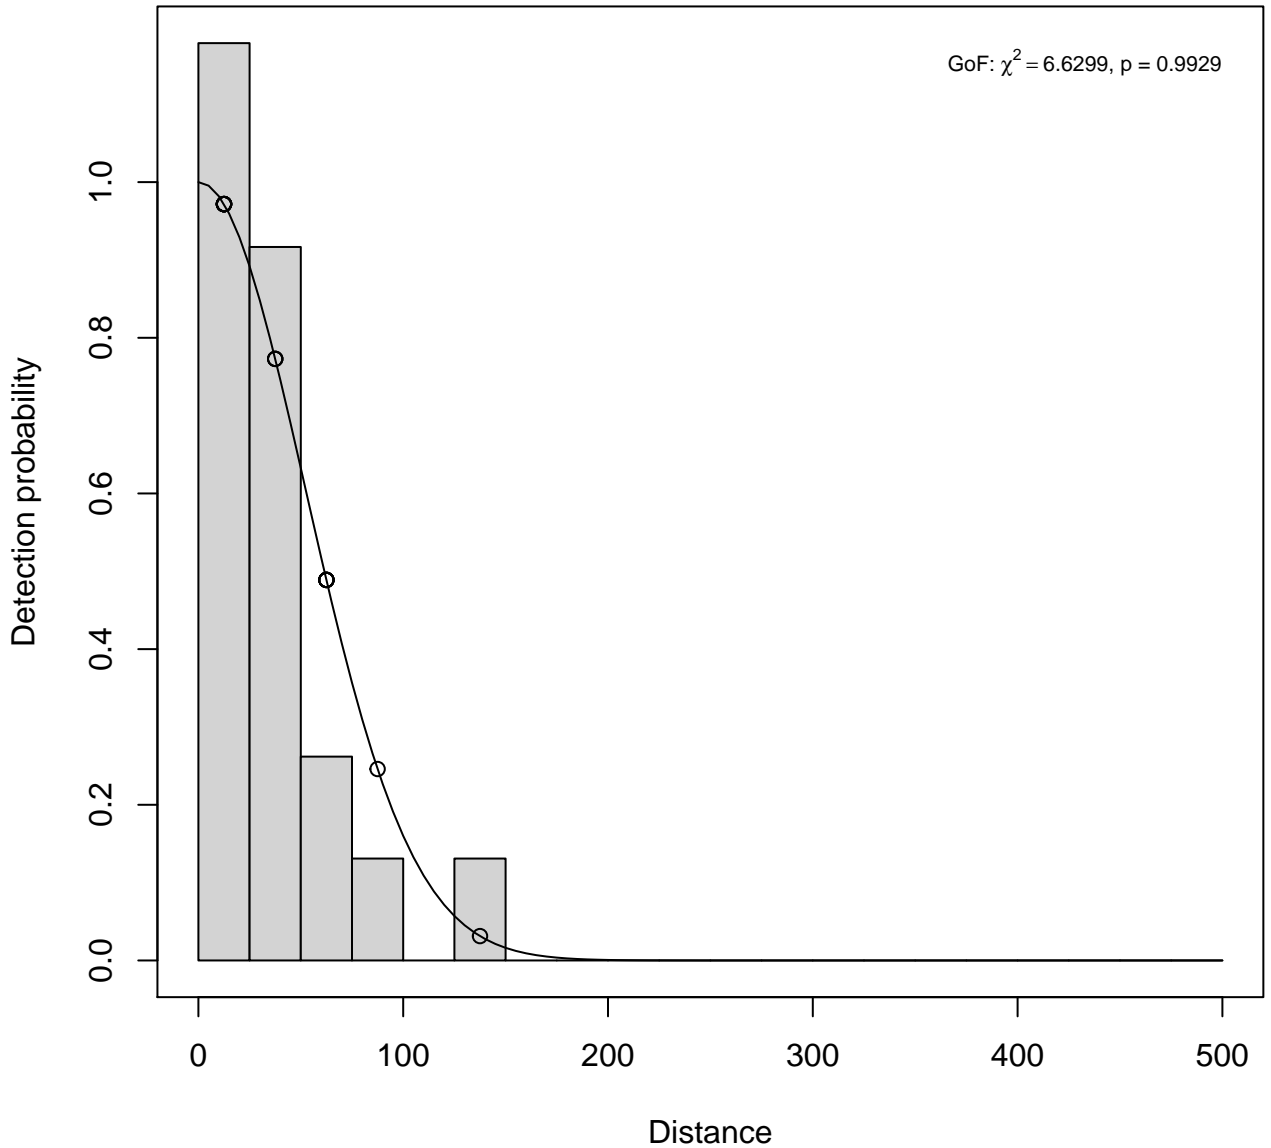

Supplement: s1 [file s1]
