# Supplementary material
Source: MDPI journal article supplement (https://www.mdpi.com/1424-2818/13/7/300)

# Forpus coelestis – Maranon dry forests – Peru

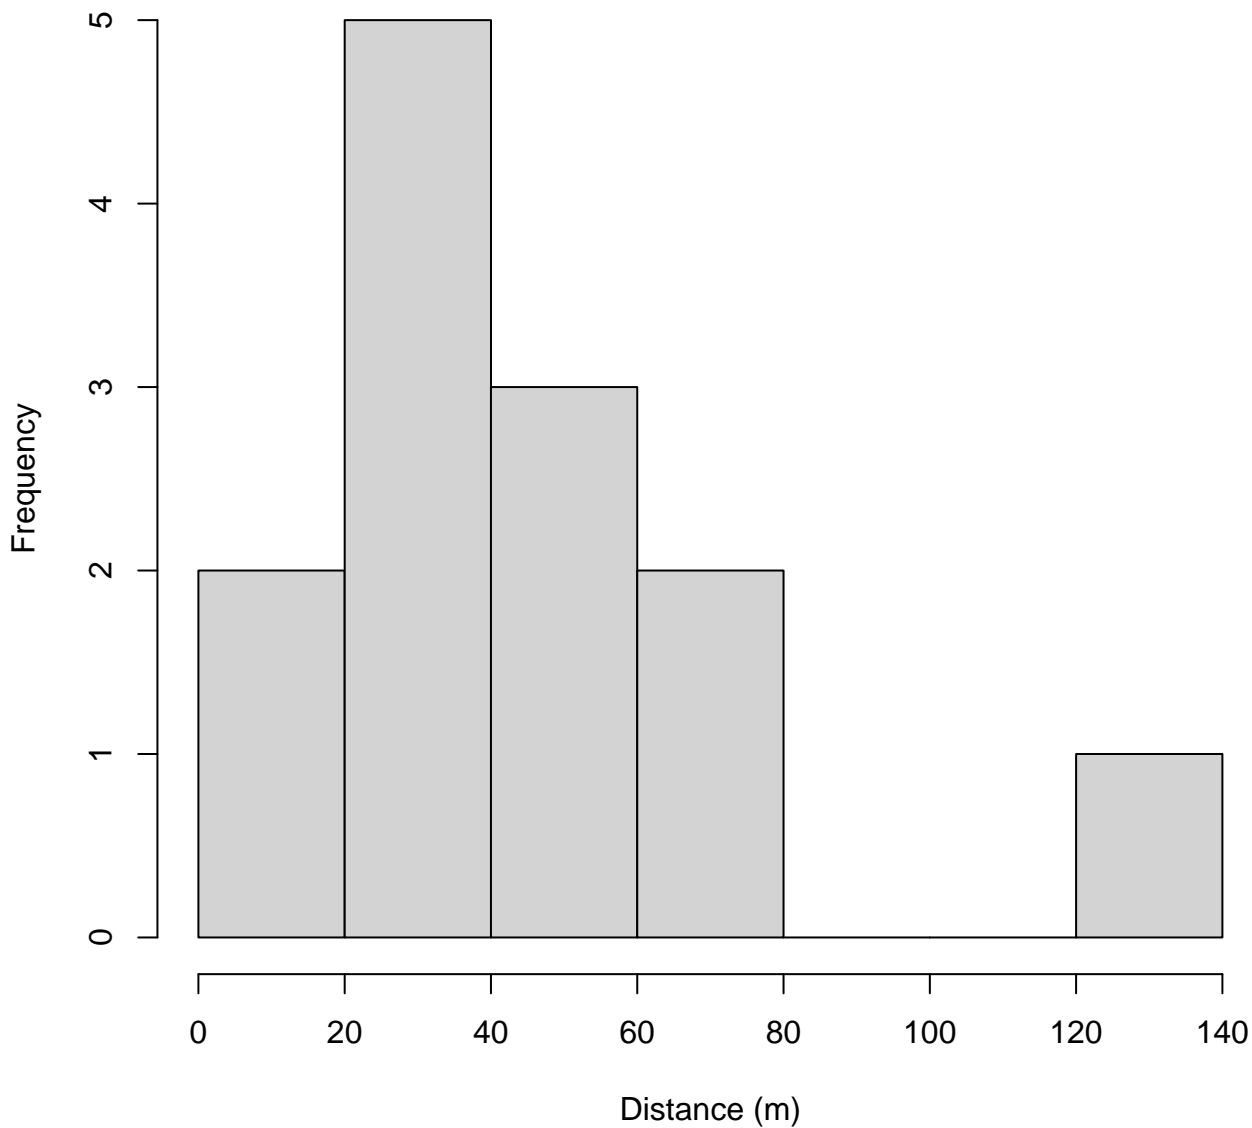

# Forpus coelestis – Maranon dry forests – Peru

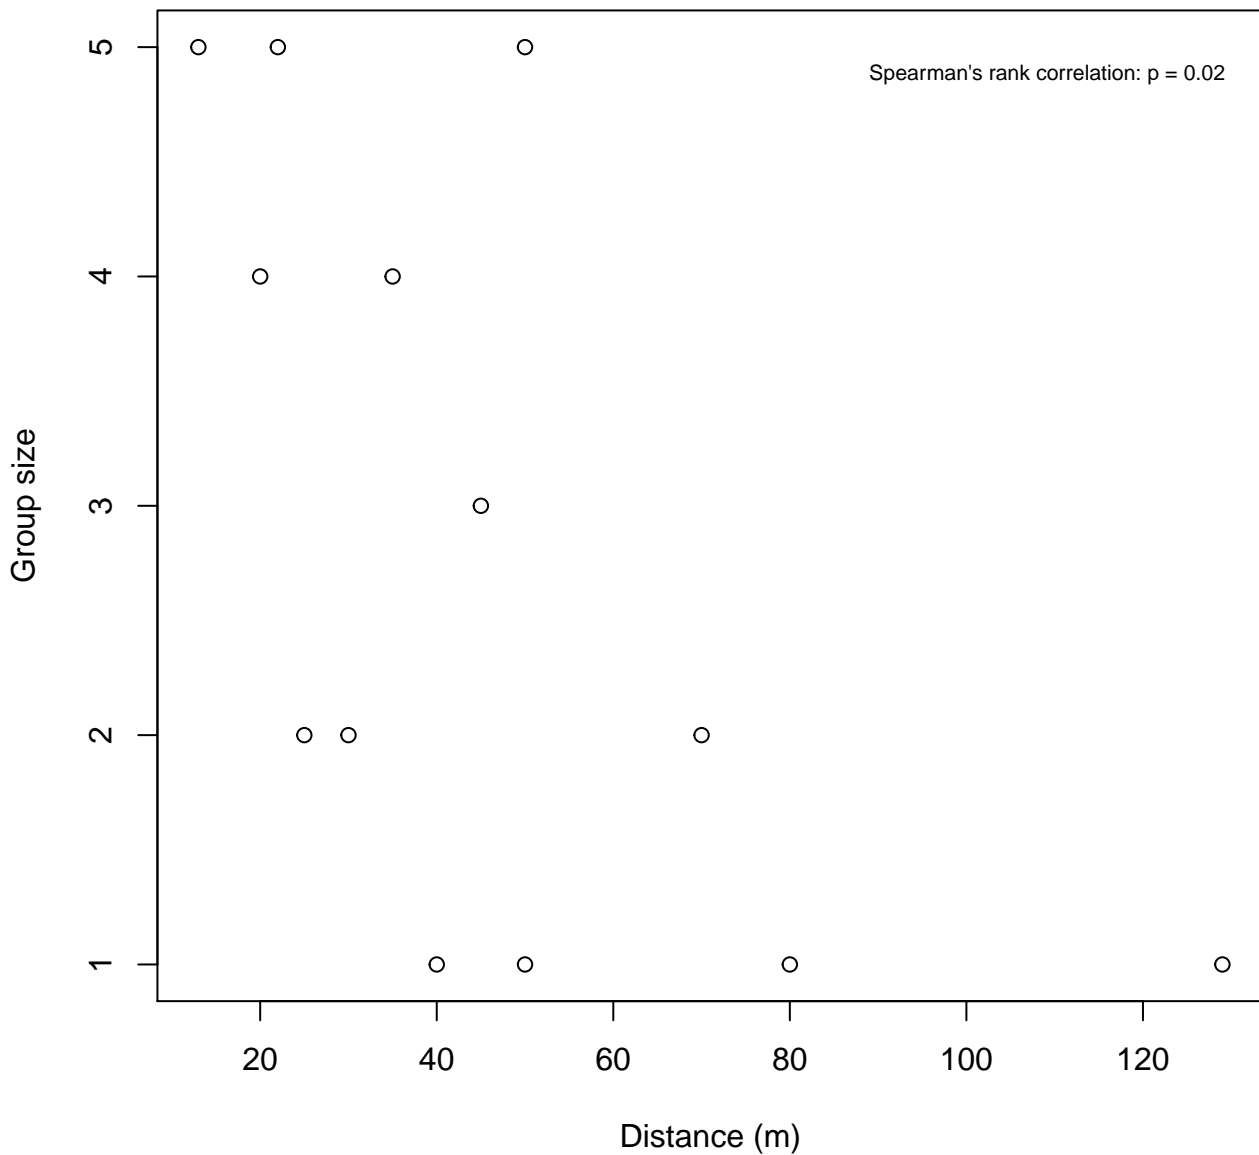

Forpus coelestis – Maranon dry forests – Peru (N = 13, key function = hn)

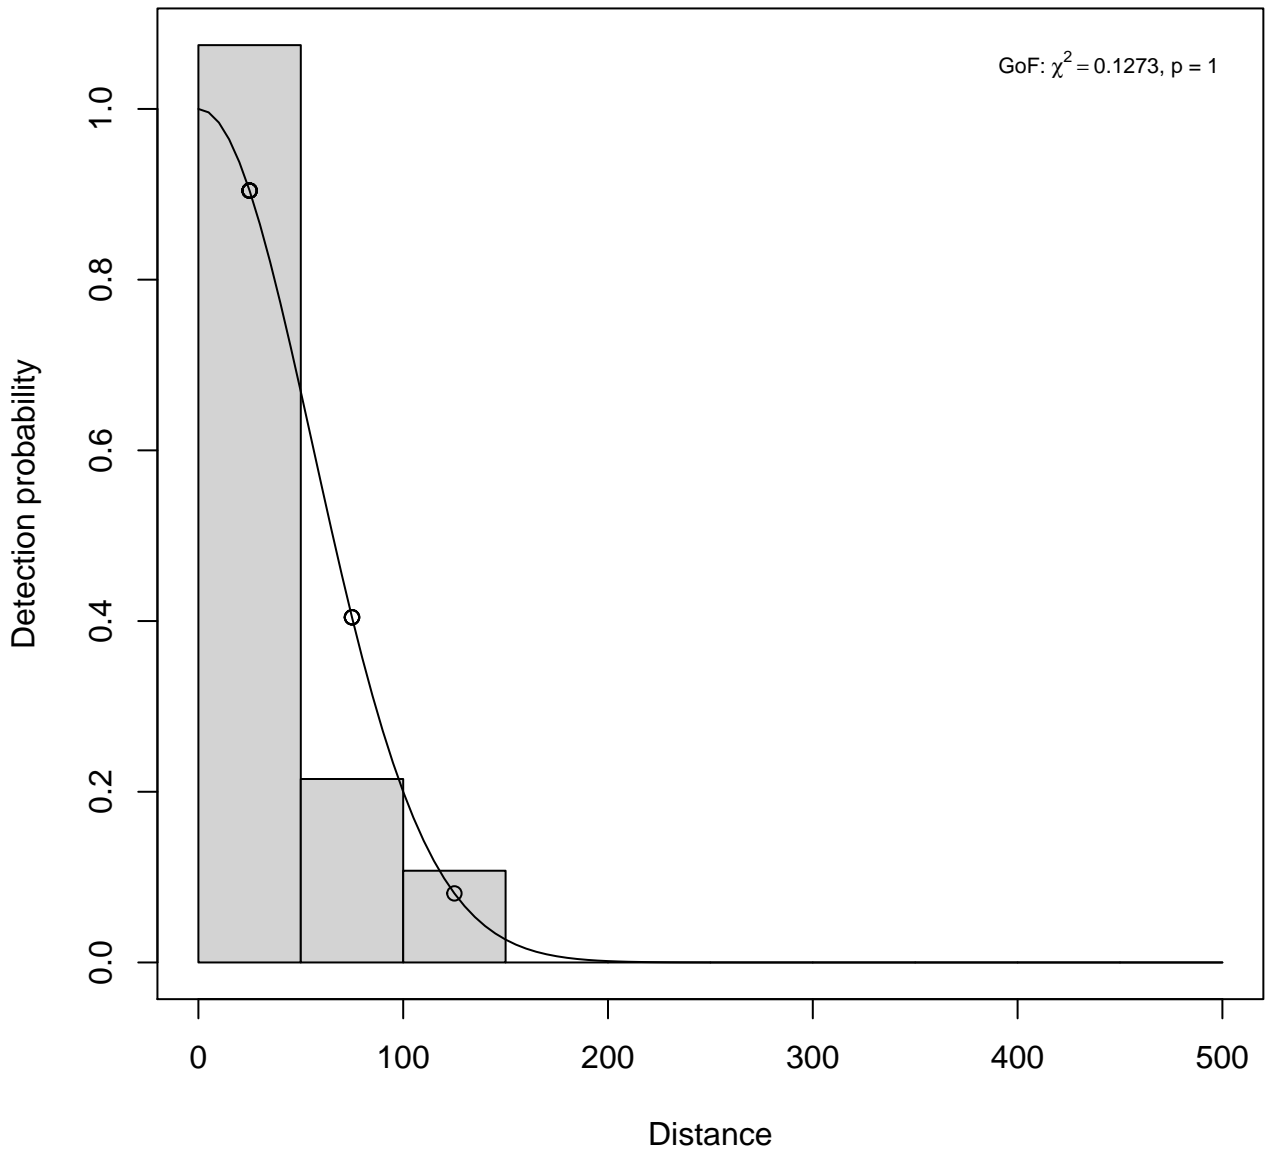

Forpus coelestis – Marañon dry forests – Peru (N = 13, key function = hn)

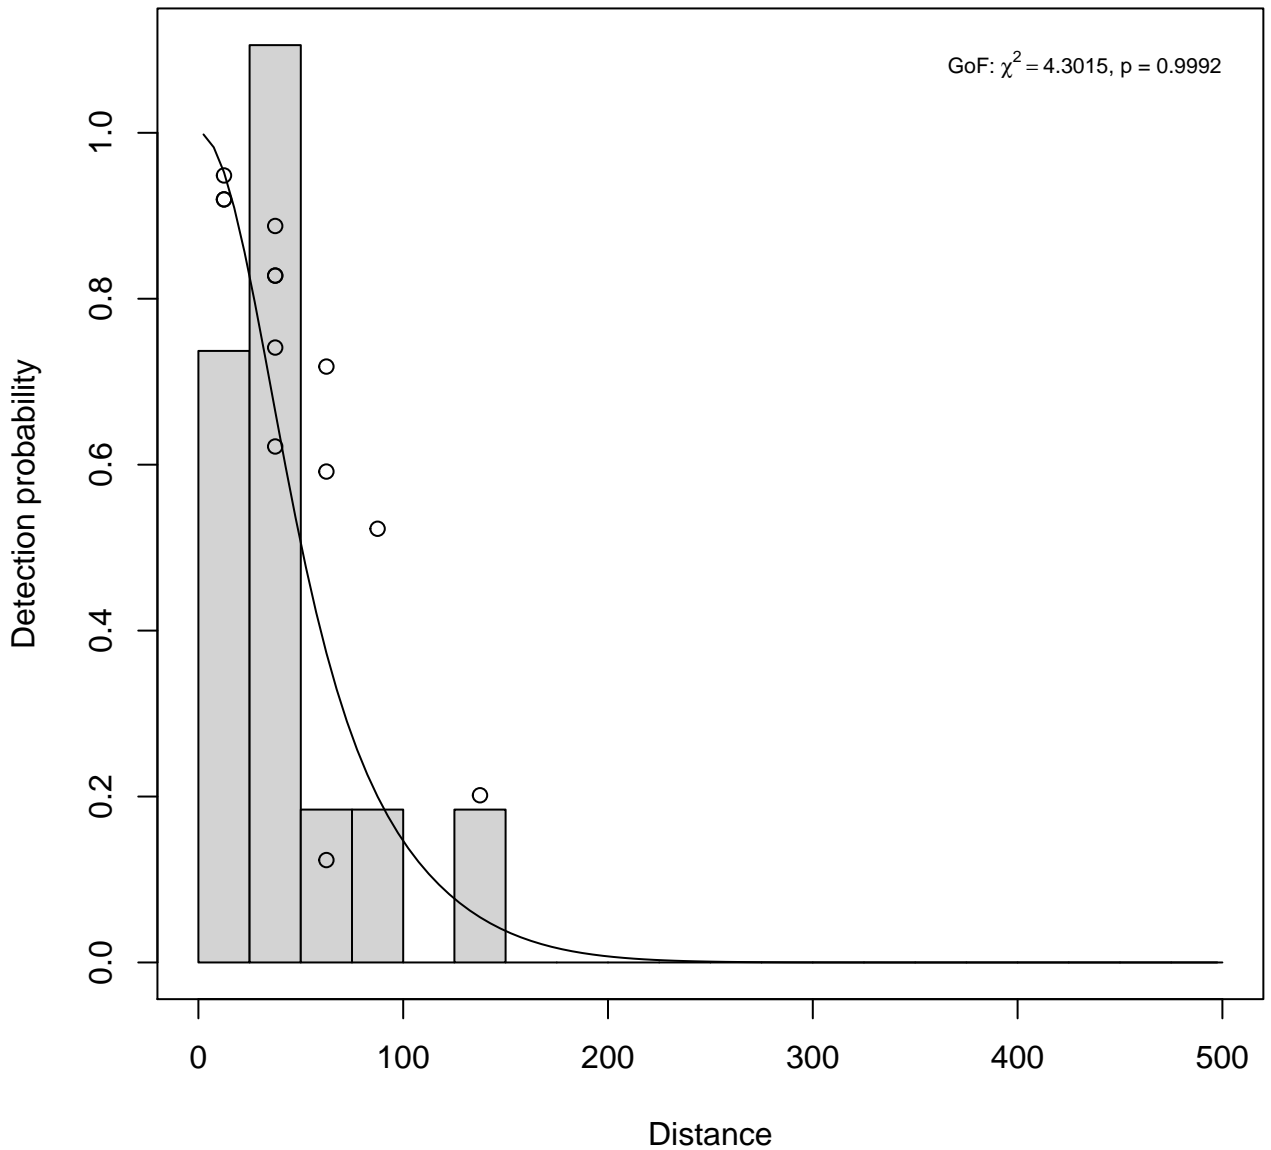

Forpus coelestis – Maranon dry forests – Peru (N = 13, key function = hn)

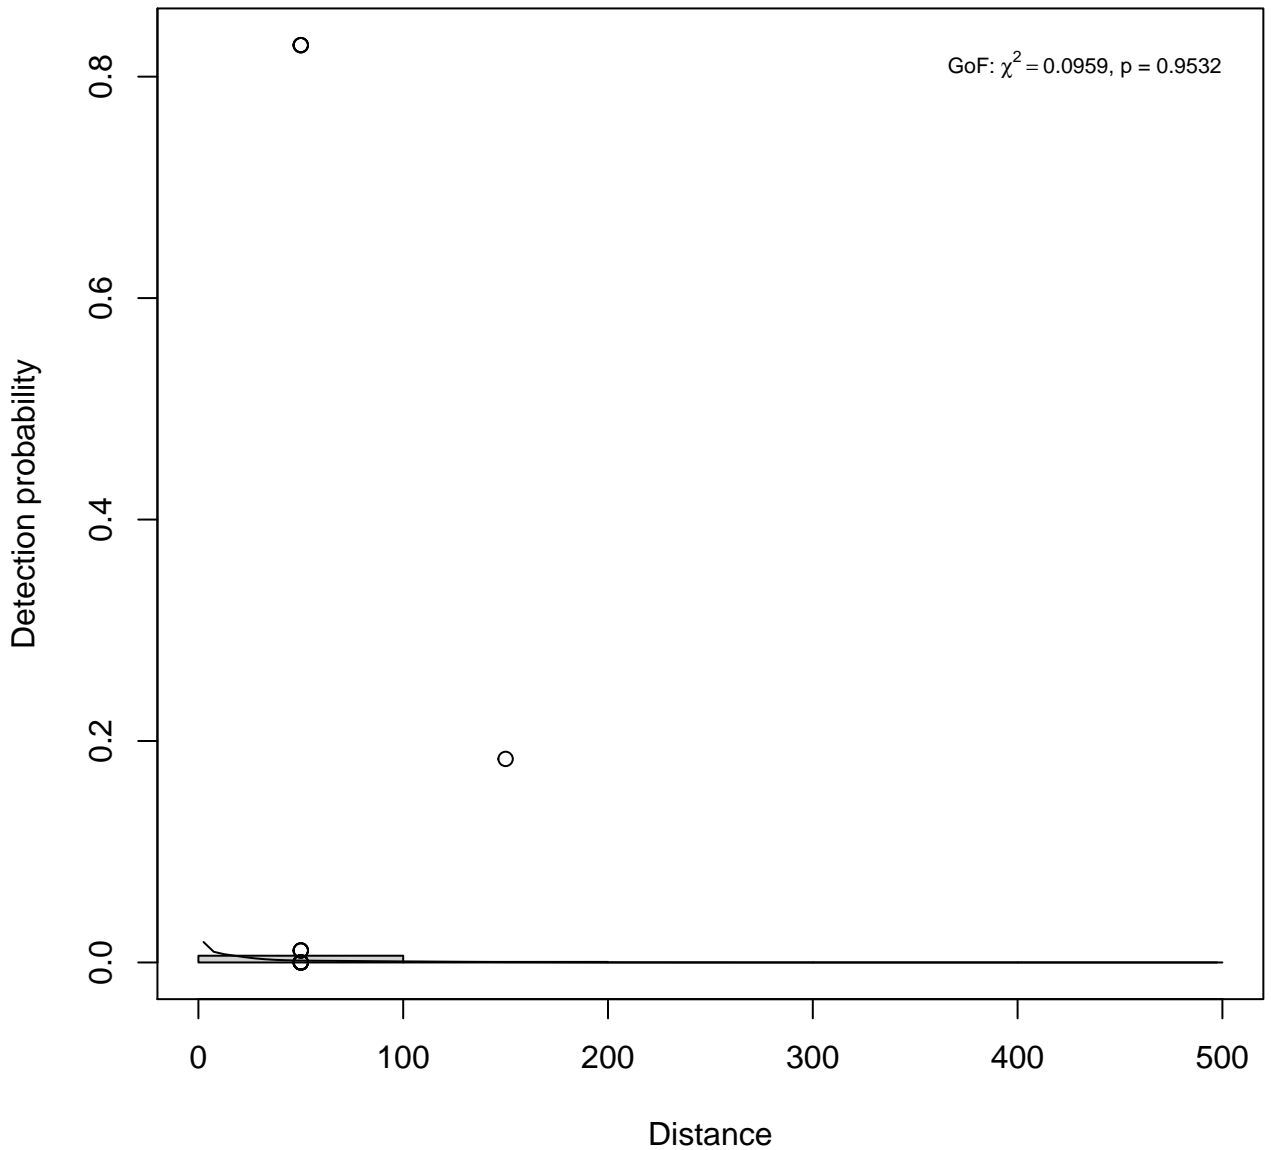

Supplement: s1 [file s1]
