# Supplementary material
Source: MDPI journal article supplement (https://www.mdpi.com/1424-2818/13/7/300)

# ***Eupsittula pertinax* – Isthmian–Pacific moist forests – Panama**

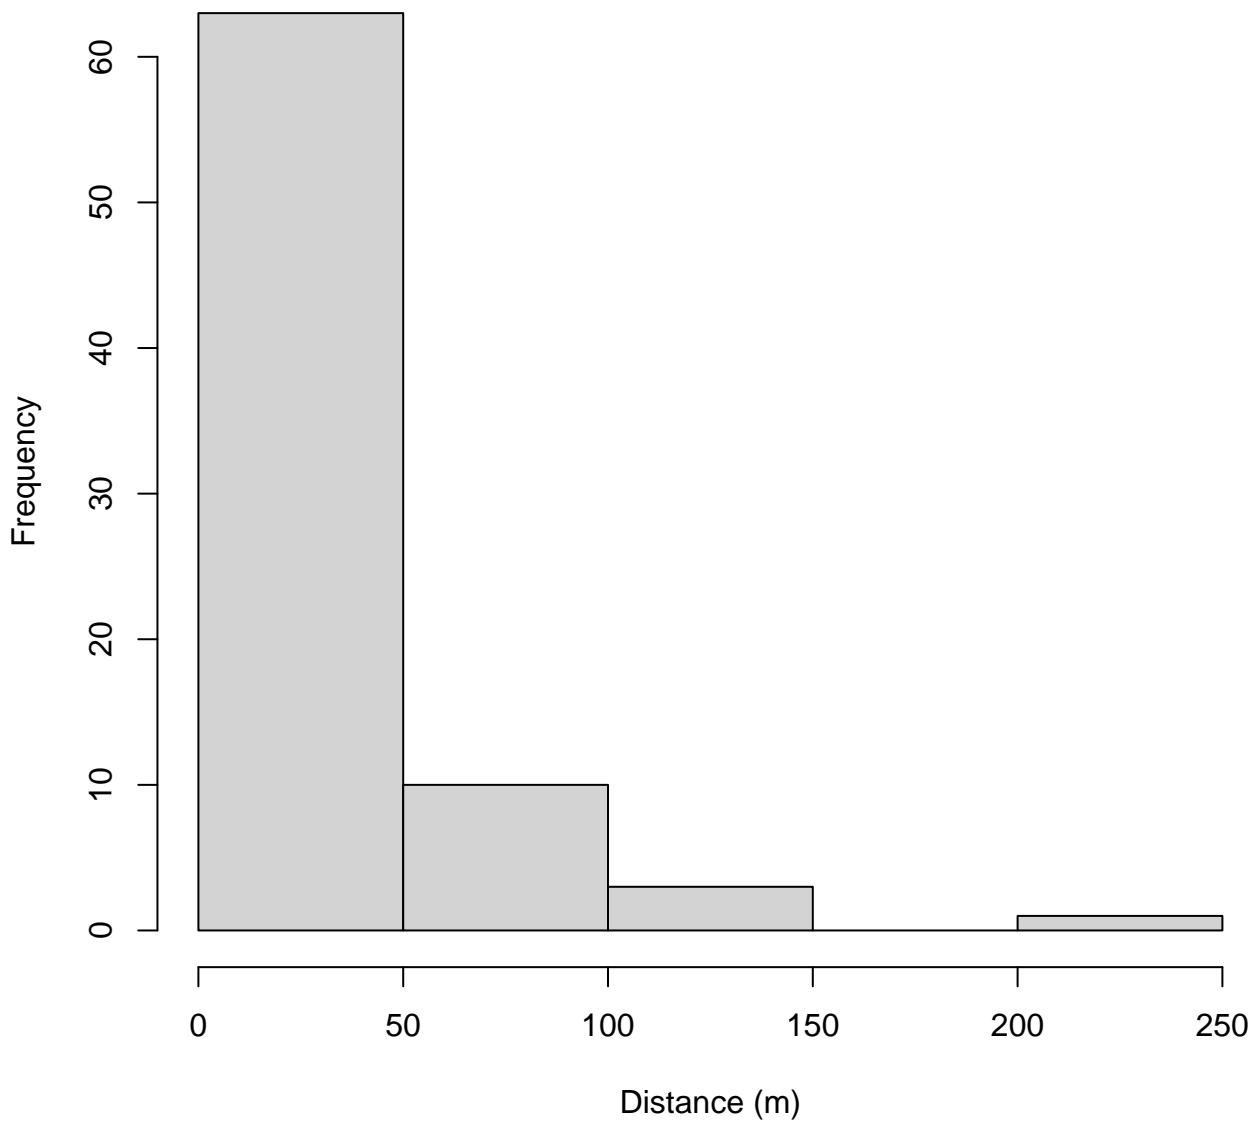

# **Eupsittula pertinax – Isthmian–Pacific moist forests – Panama**

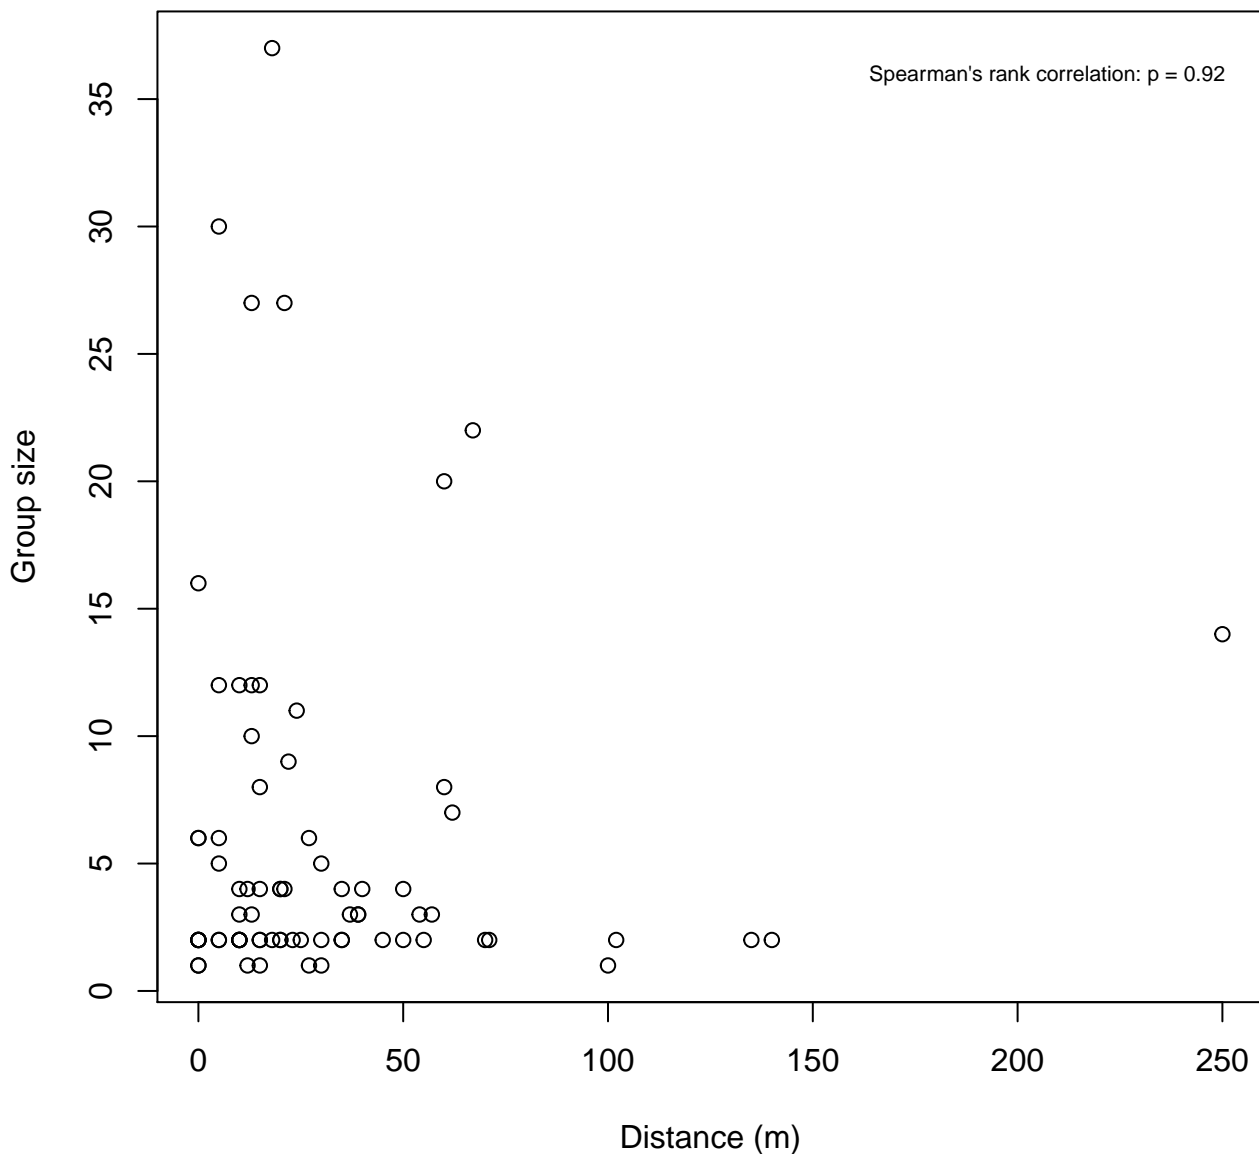

*Eupsittula pertinax* – Isthmian–Pacific moist forests – Panama (N = 77, key function = hr)

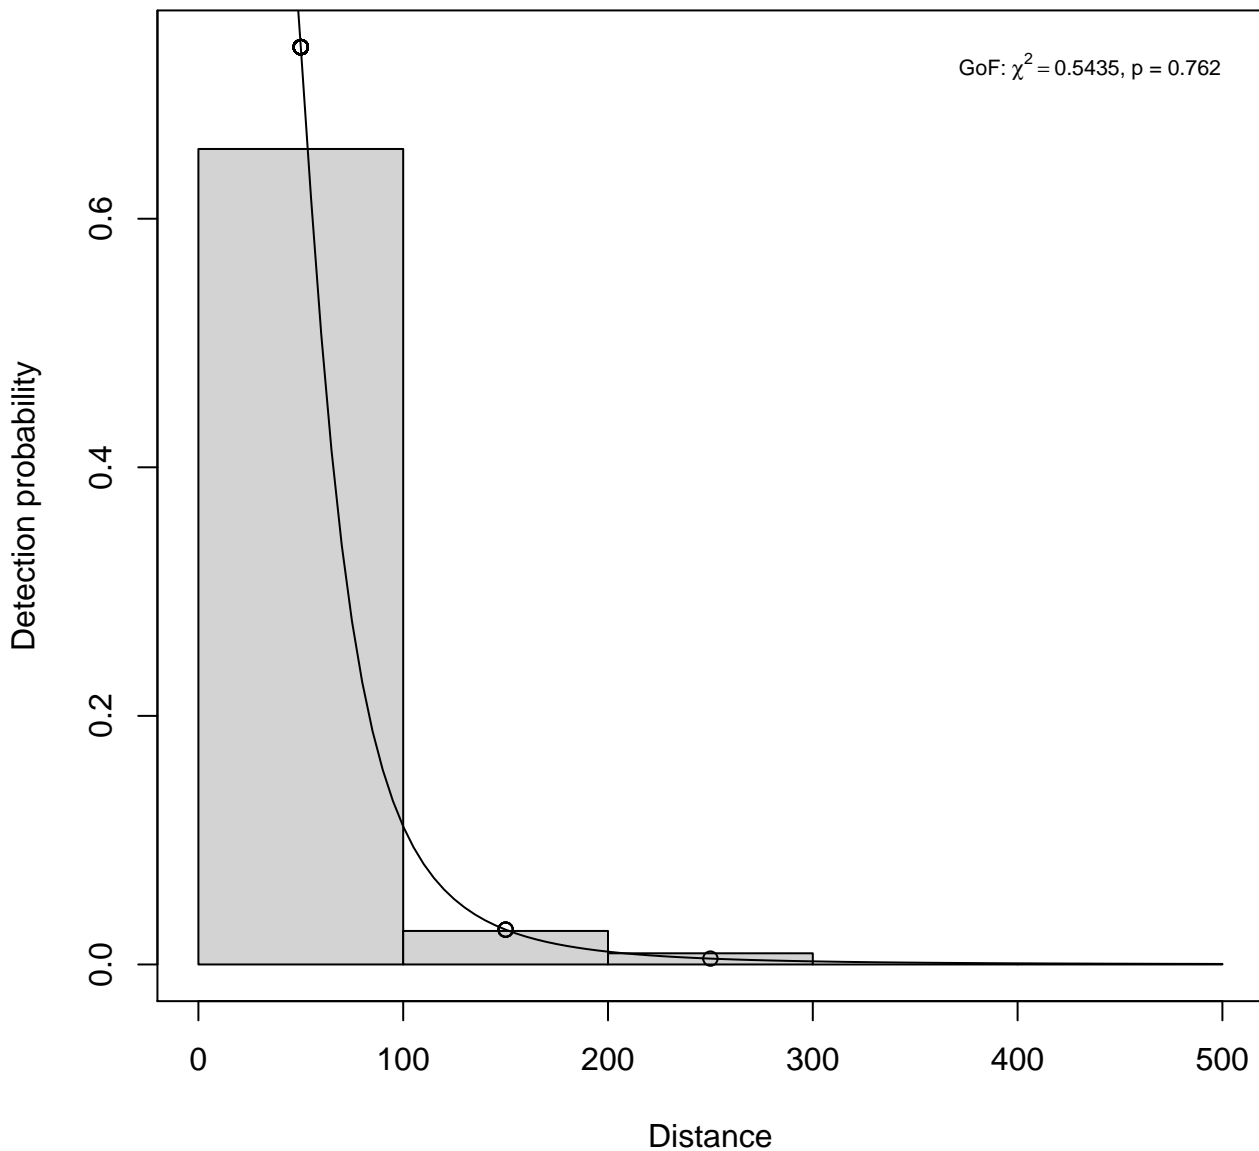

*Eupsittula pertinax* – Isthmian–Pacific moist forests – Panama (N = 77, key function = hr)

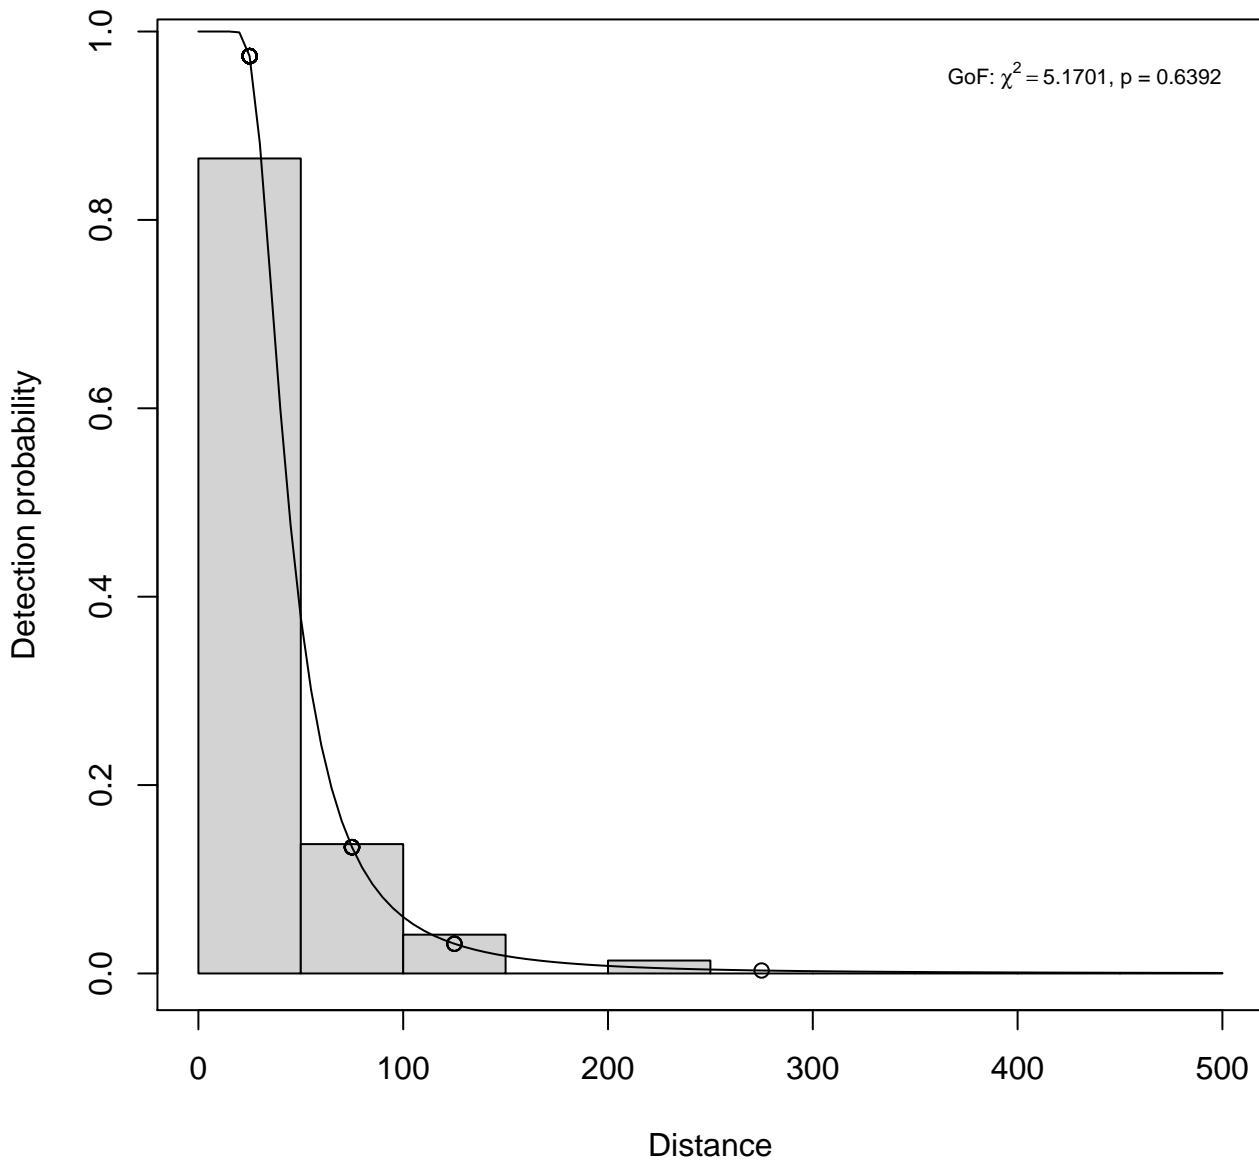

*Eupsittula pertinax* – Isthmian–Pacific moist forests – Panama (N = 77, key function = hr)

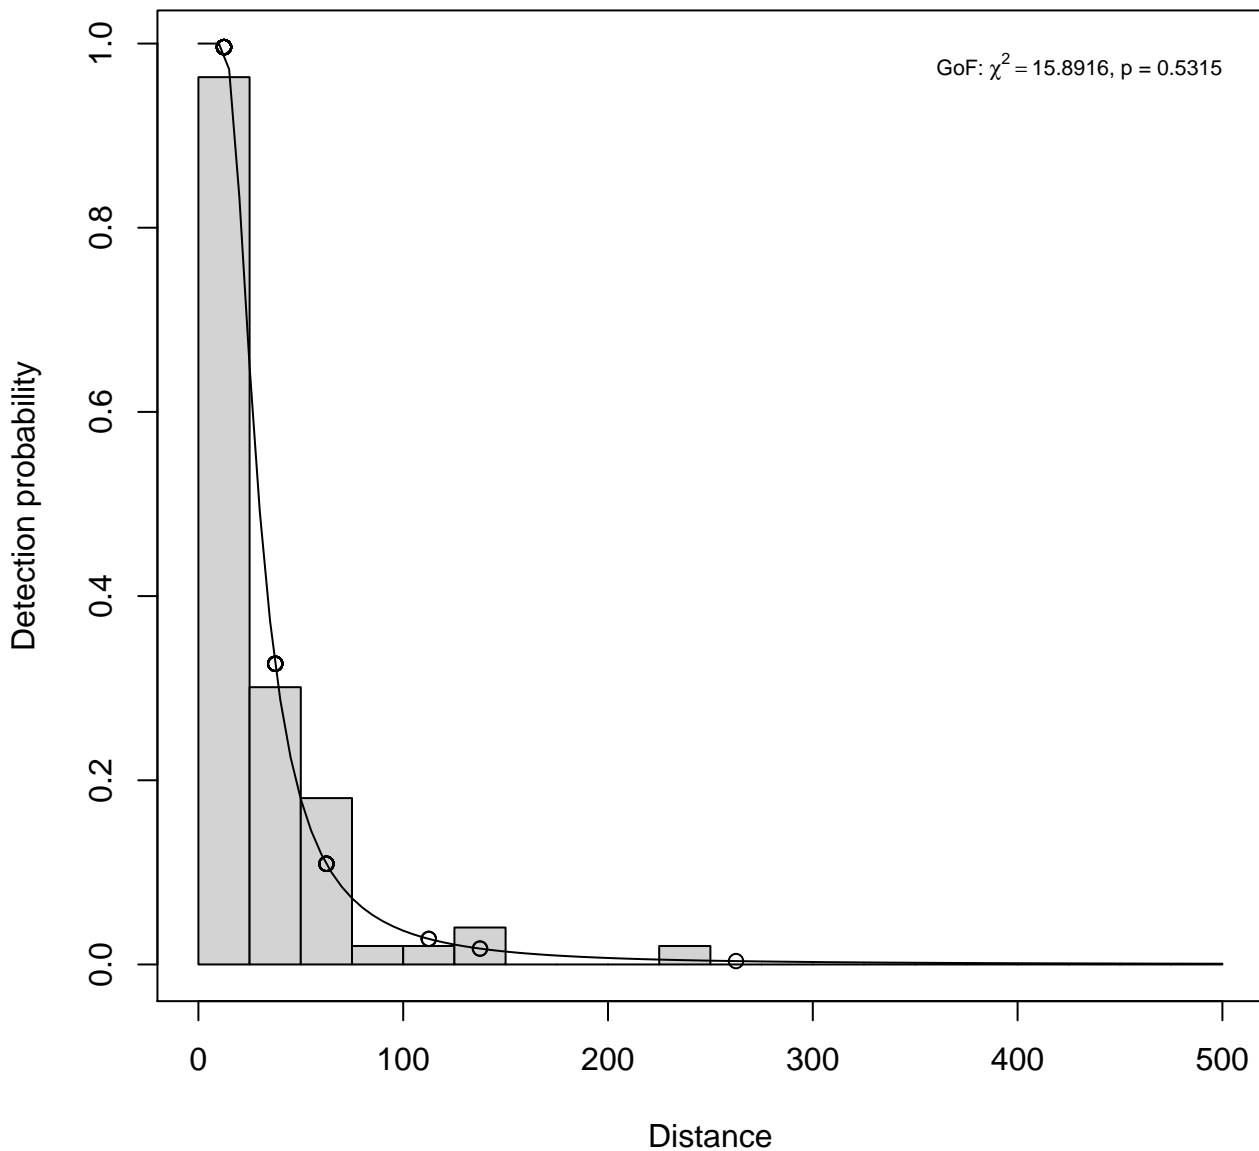

Supplement: s1 [file s1]
