# Supplementary material
Source: MDPI journal article supplement (https://www.mdpi.com/1424-2818/13/7/300)

# **Pionus maximiliani – Chiquitano dry forests – Bolivia**

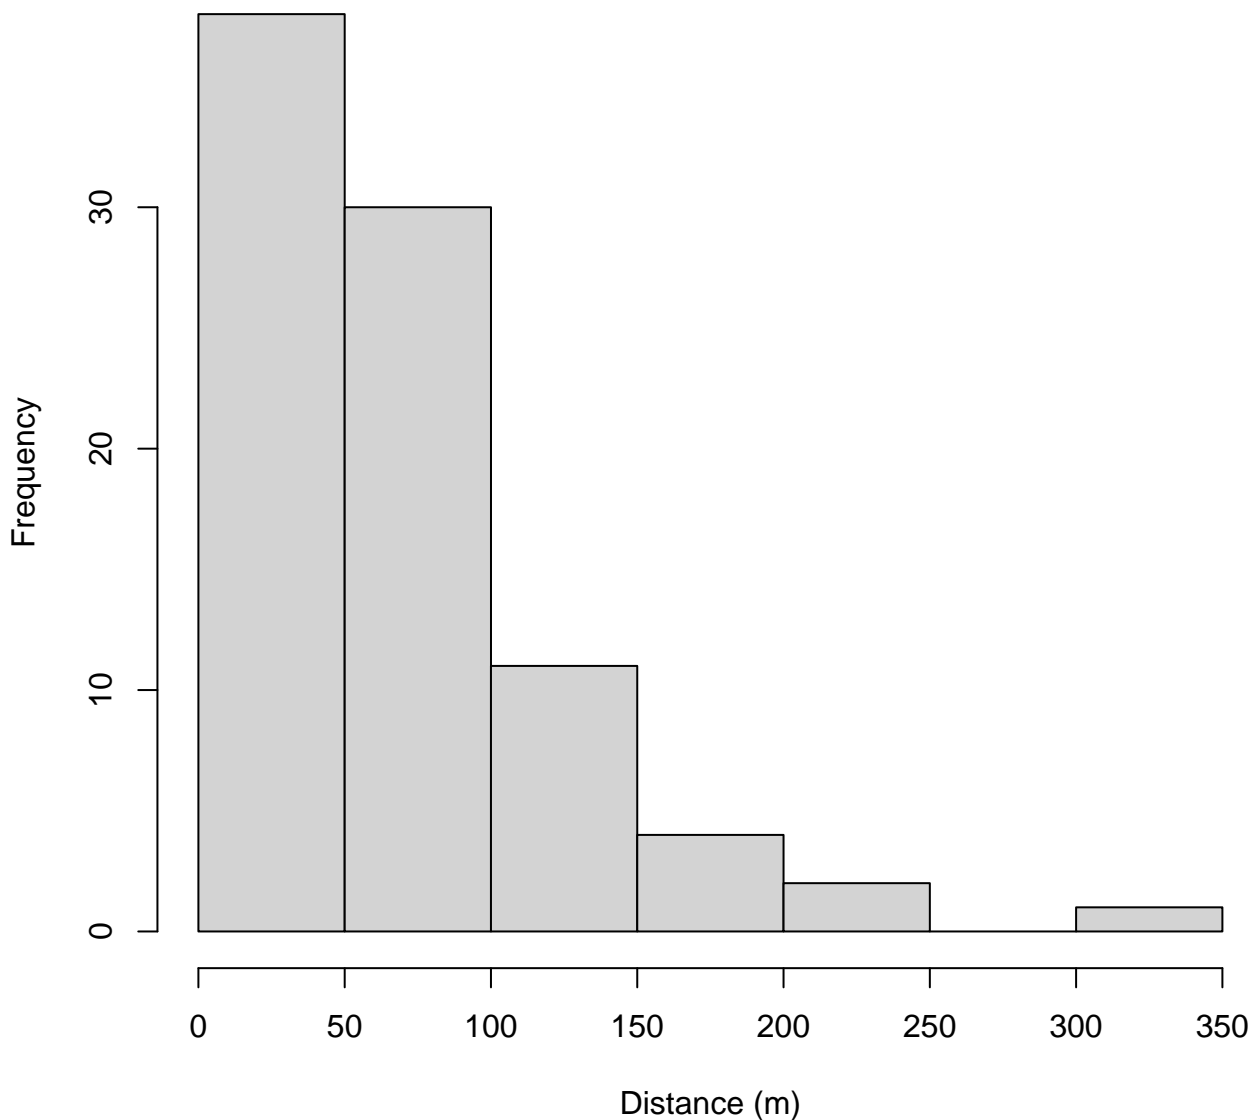

# **Pionus maximiliani – Chiquitano dry forests – Bolivia**

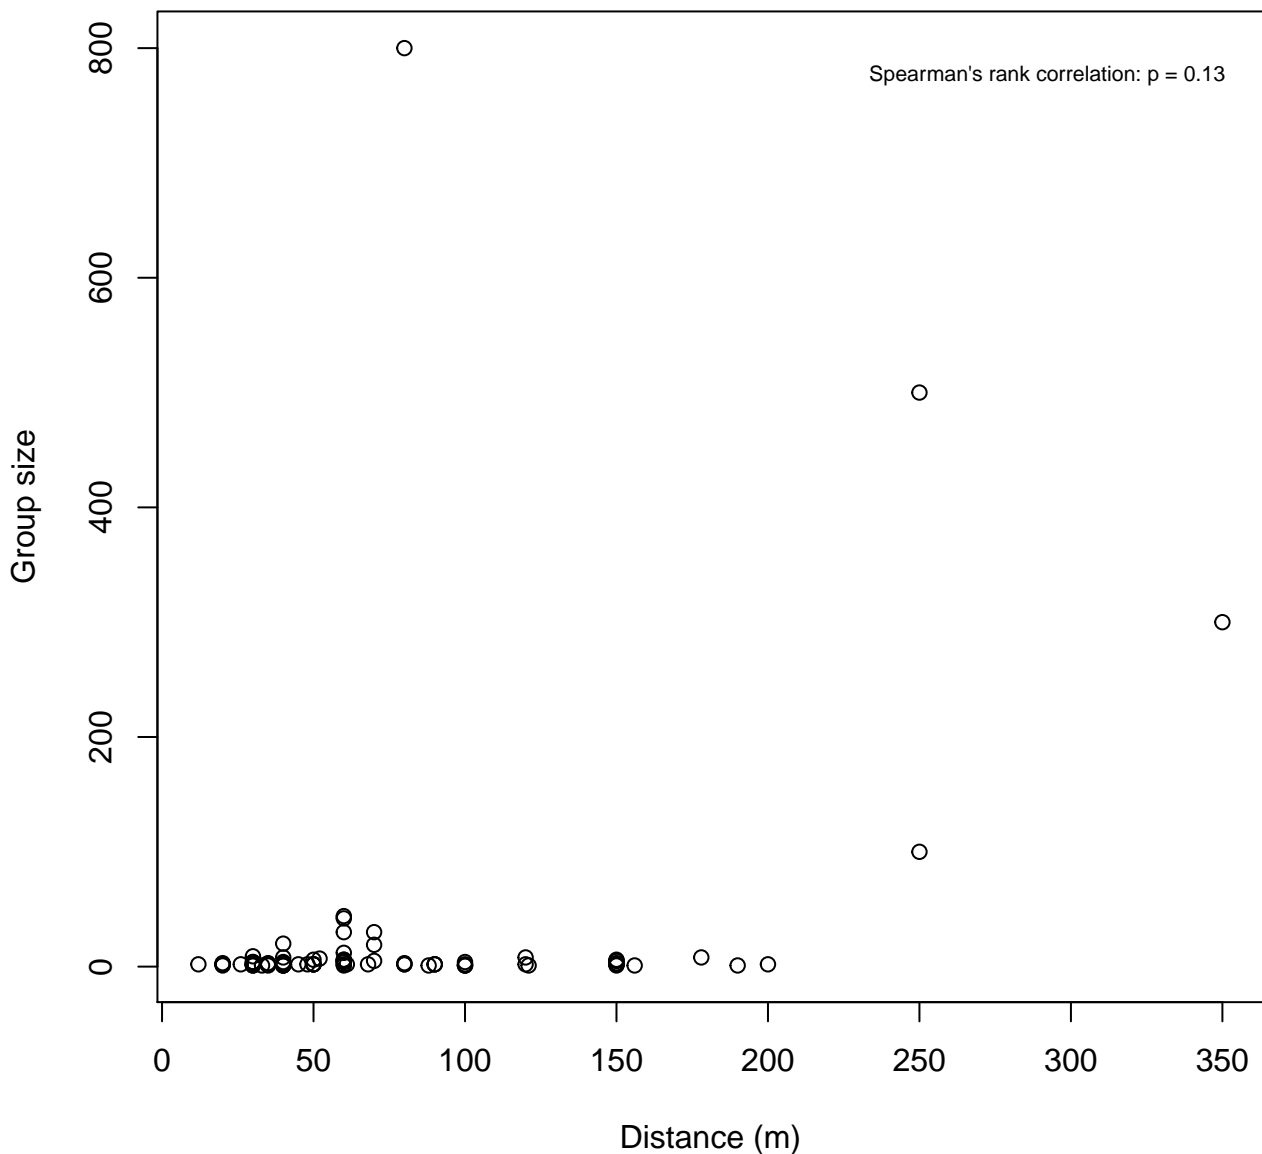

*Pionus maximiliani* – Chiquitano dry forests – Bolivia (N = 86, key function = hn)

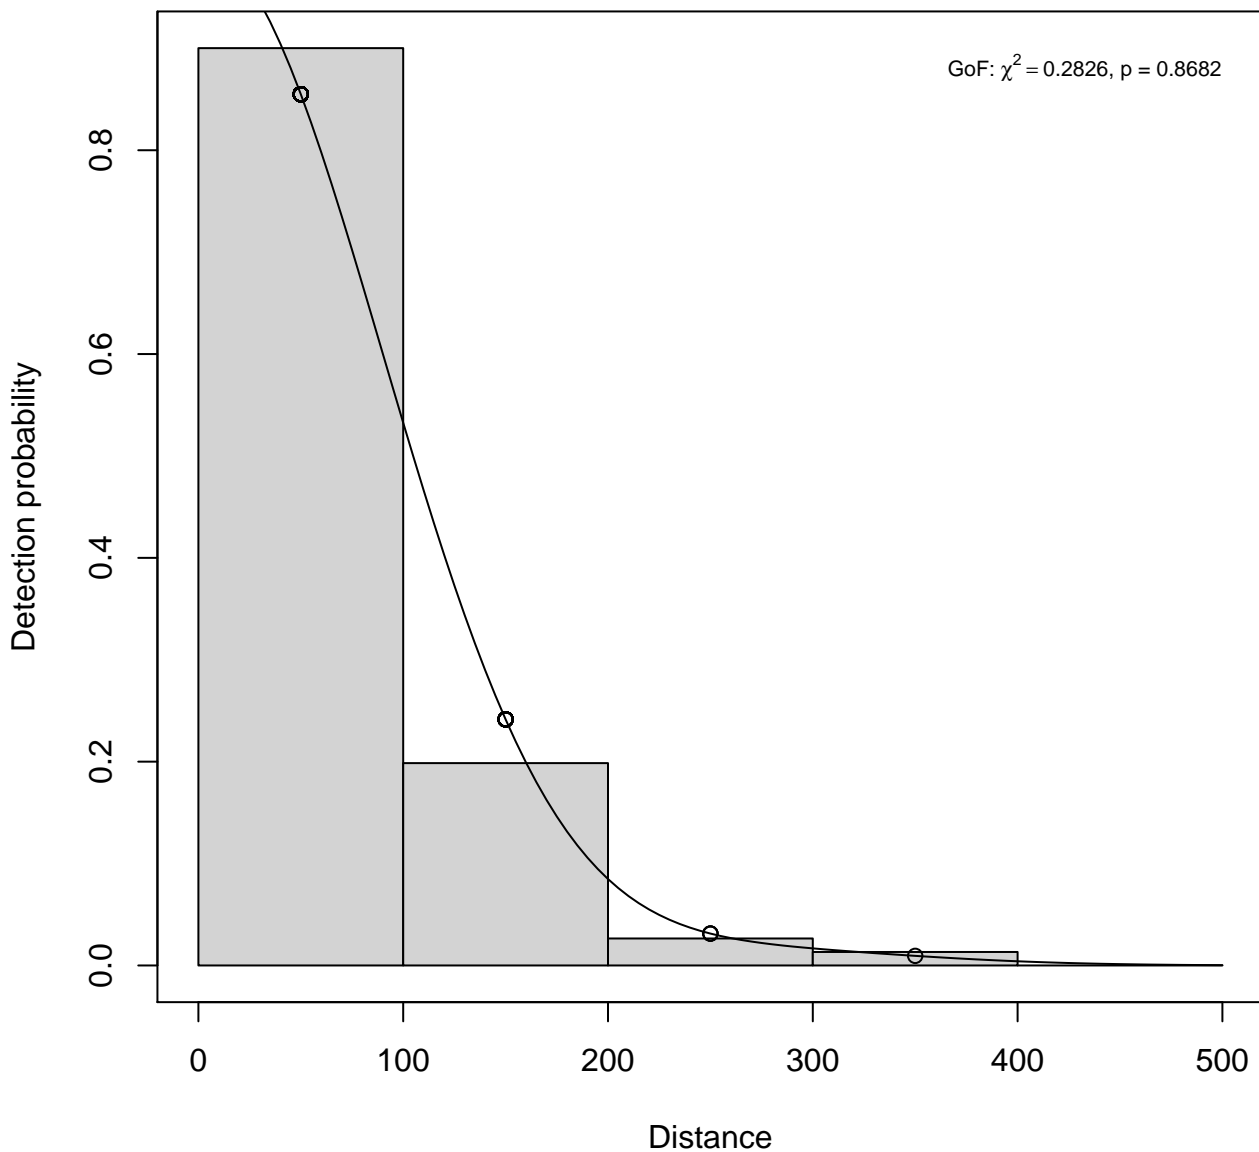

Pionus maximiliani – Chiquitano dry forests – Bolivia (N = 86, key function = hn)

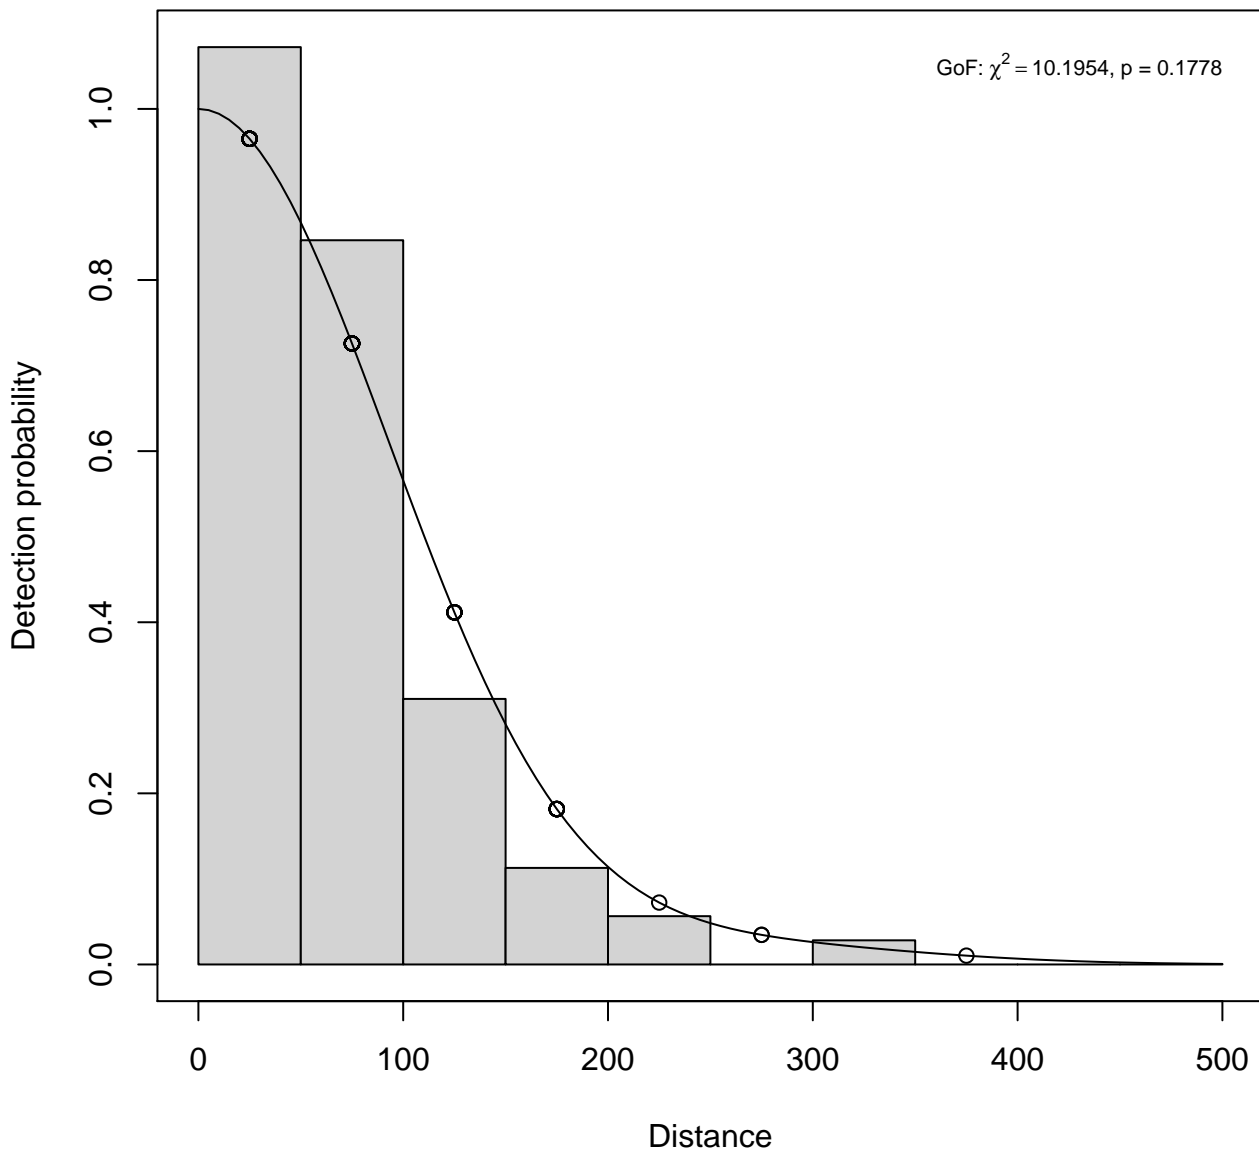

Pionus maximiliani – Chiquitano dry forests – Bolivia (N = 86, key function = hr)

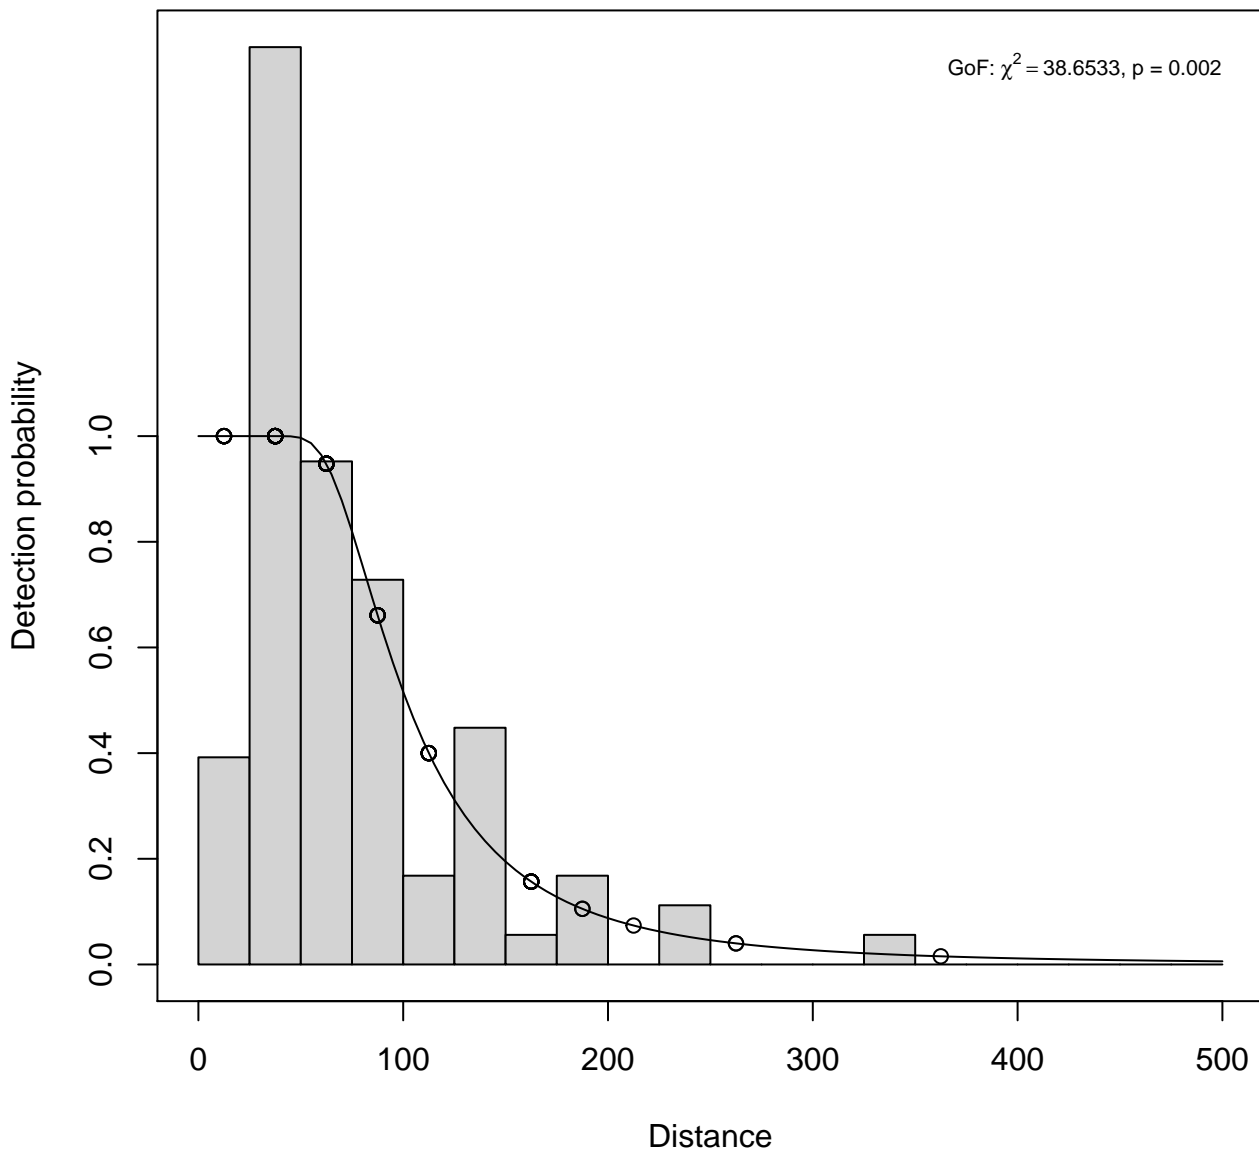

Supplement: s1 [file s1]
