# Supplementary material
Source: MDPI journal article supplement (https://www.mdpi.com/1424-2818/13/7/300)

# Amazona amazonica – Cerrado – Brazil

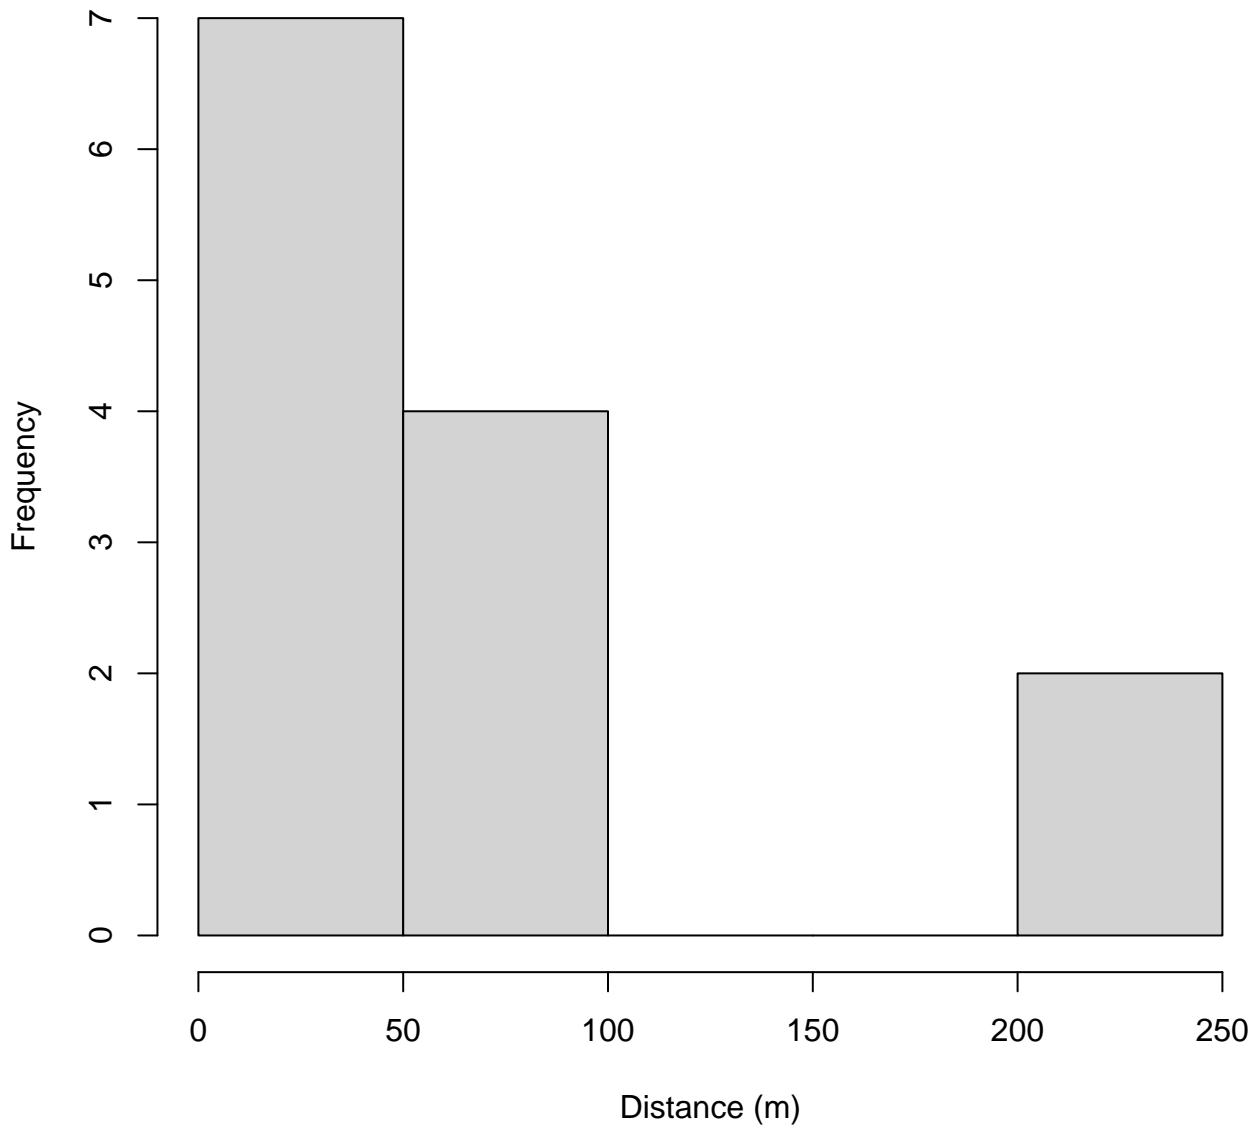

# Amazona amazonica – Cerrado – Brazil

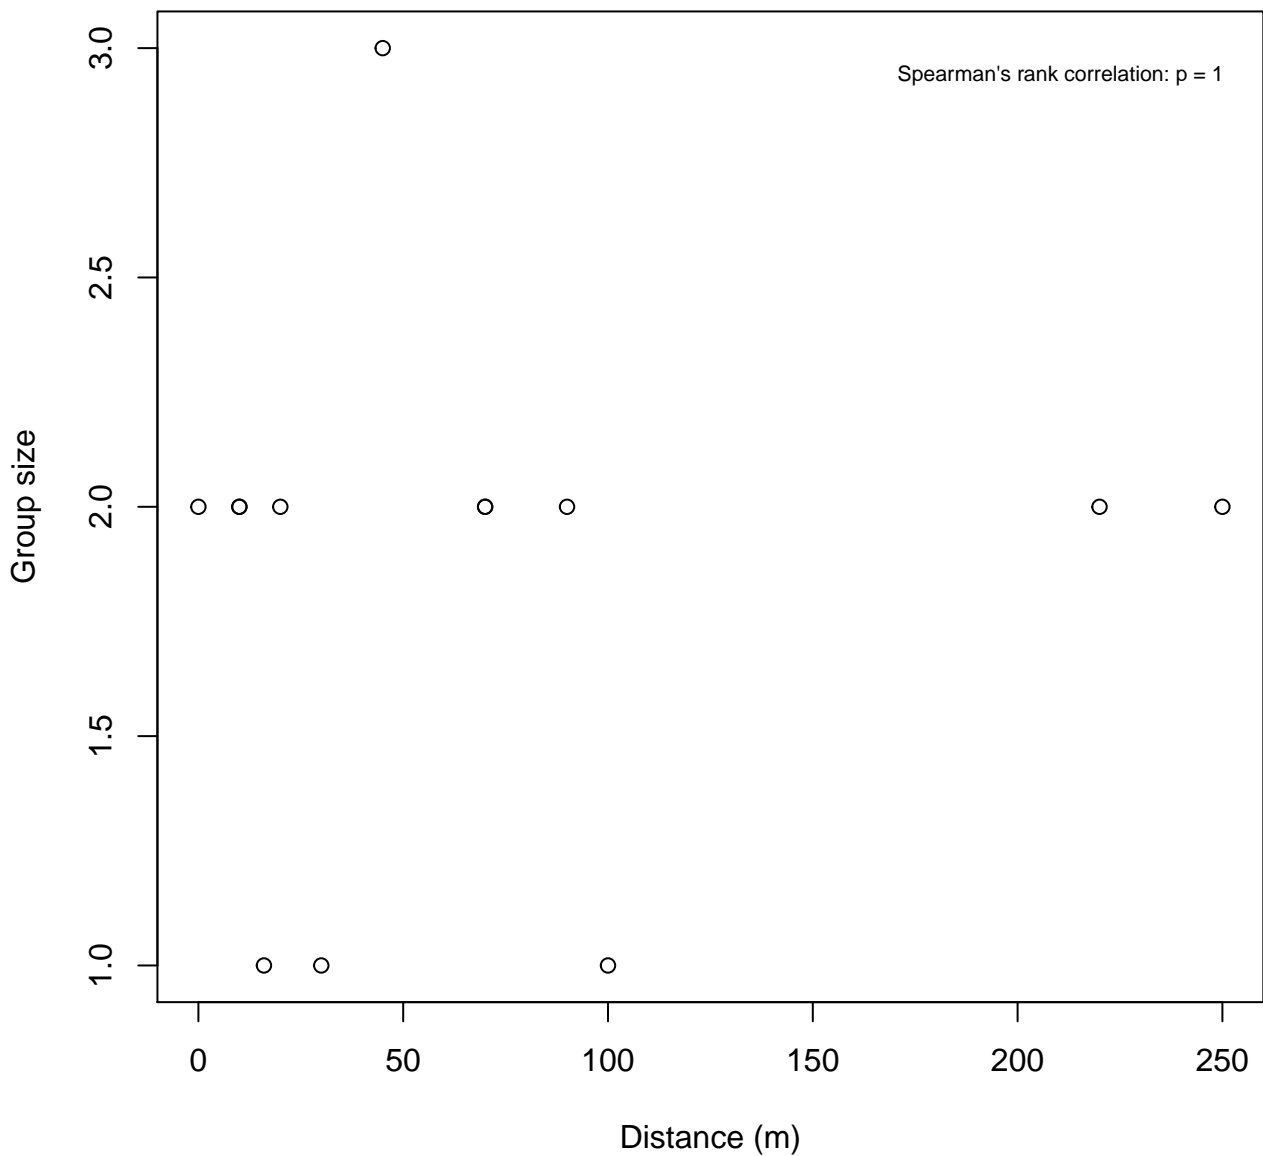

Amazona amazonica – Cerrado – Brazil (N = 13, key function = hr)

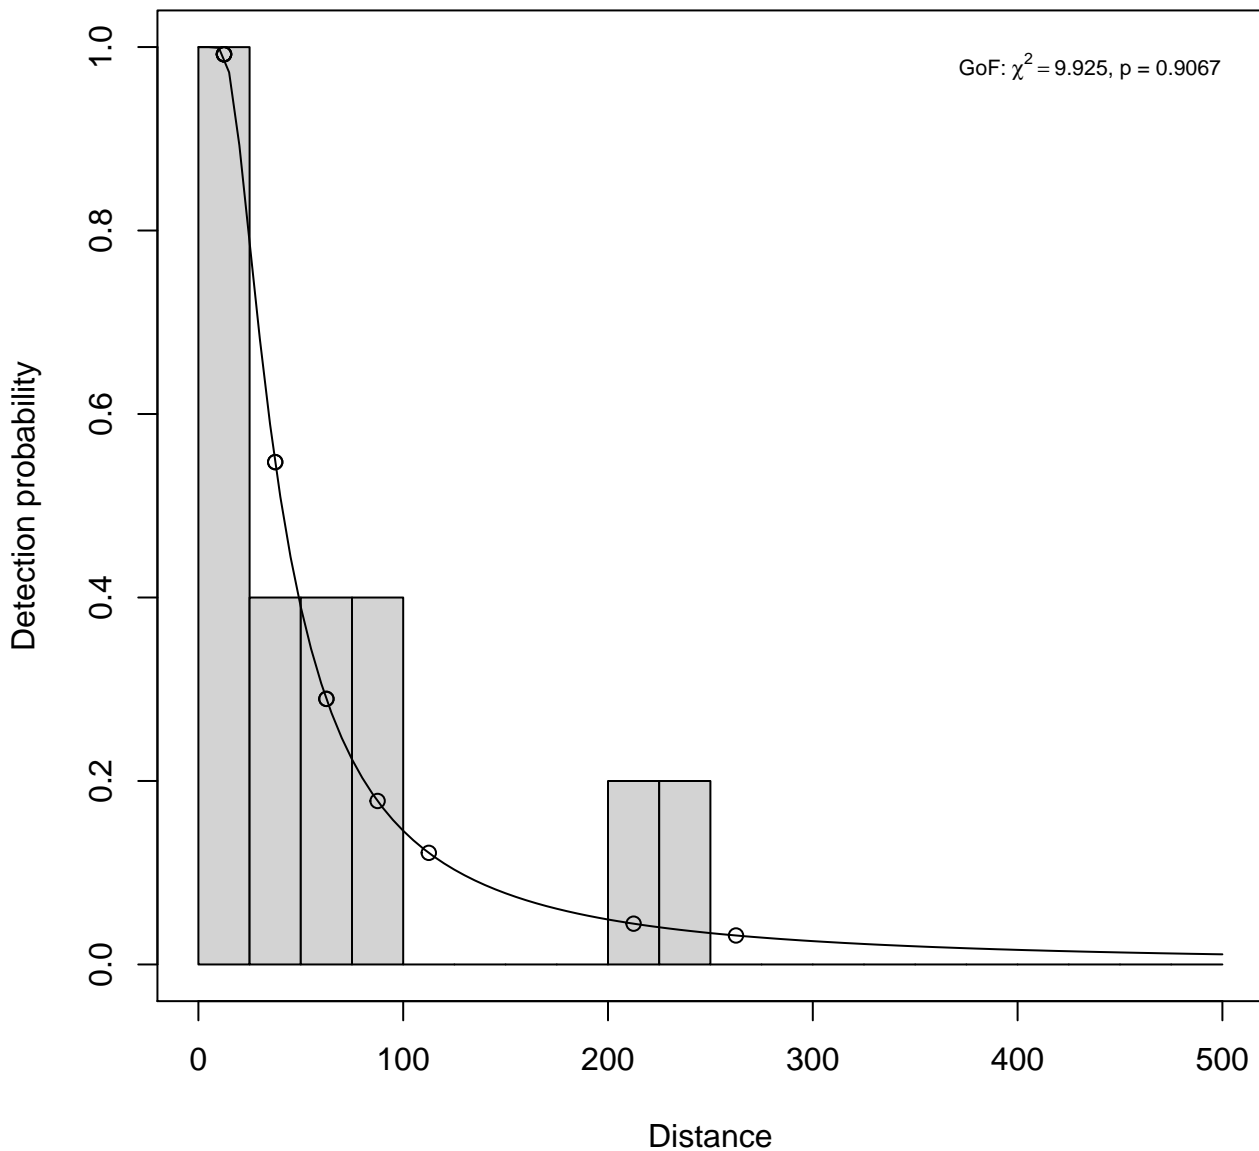

Amazona amazonica – Cerrado – Brazil (N = 13, key function = hr)

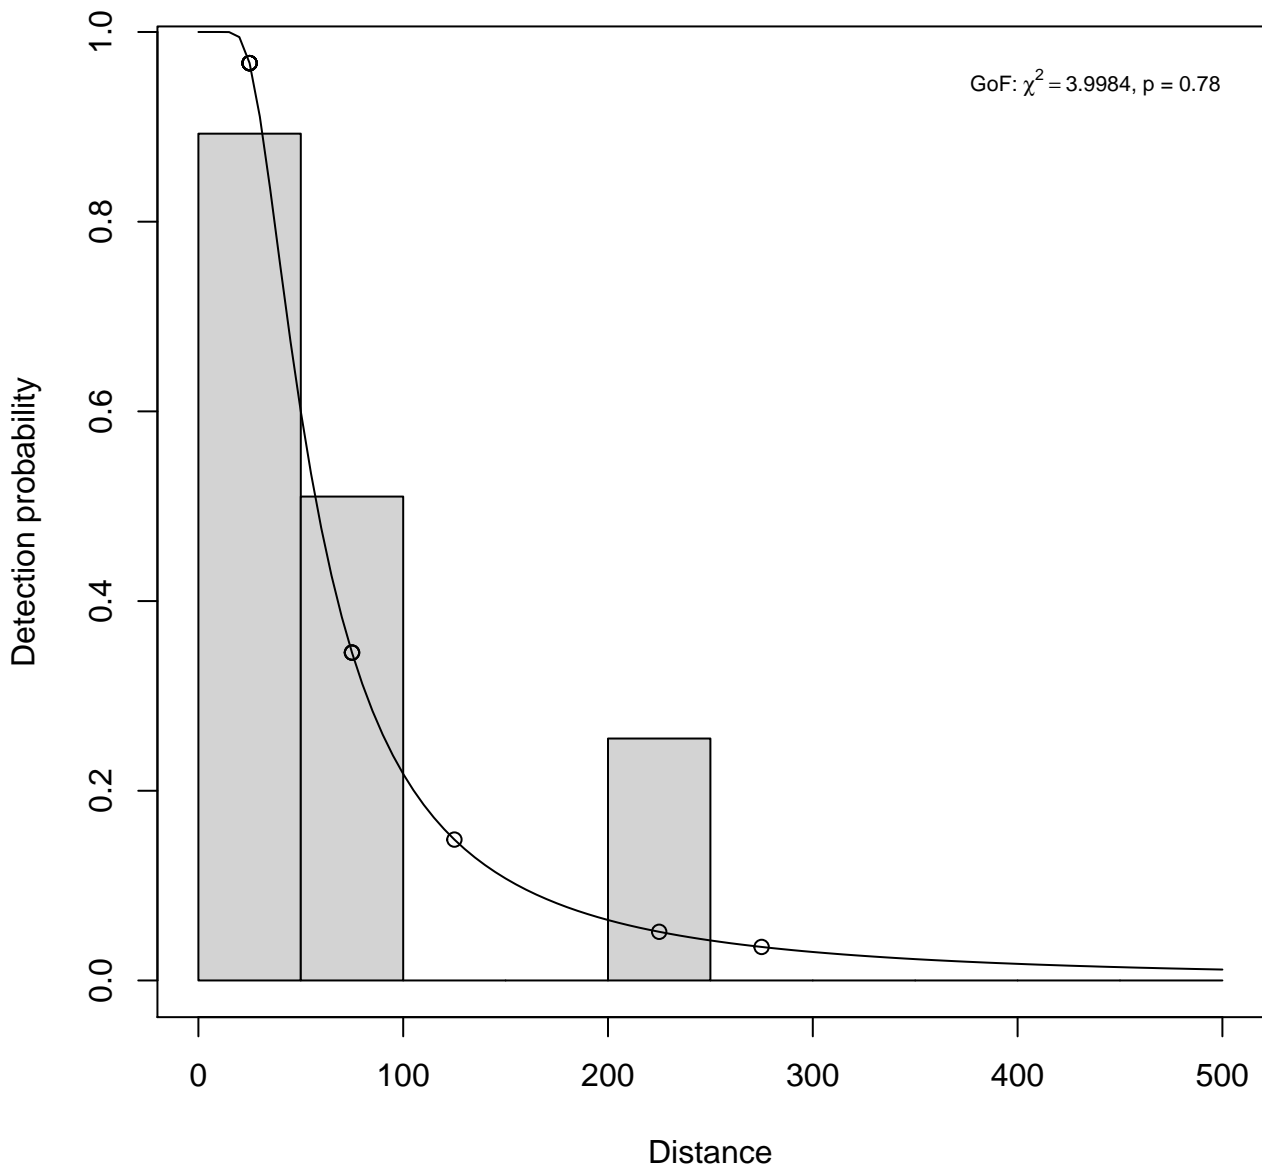

Amazona amazonica – Cerrado – Brazil (N = 13, key function = hn)

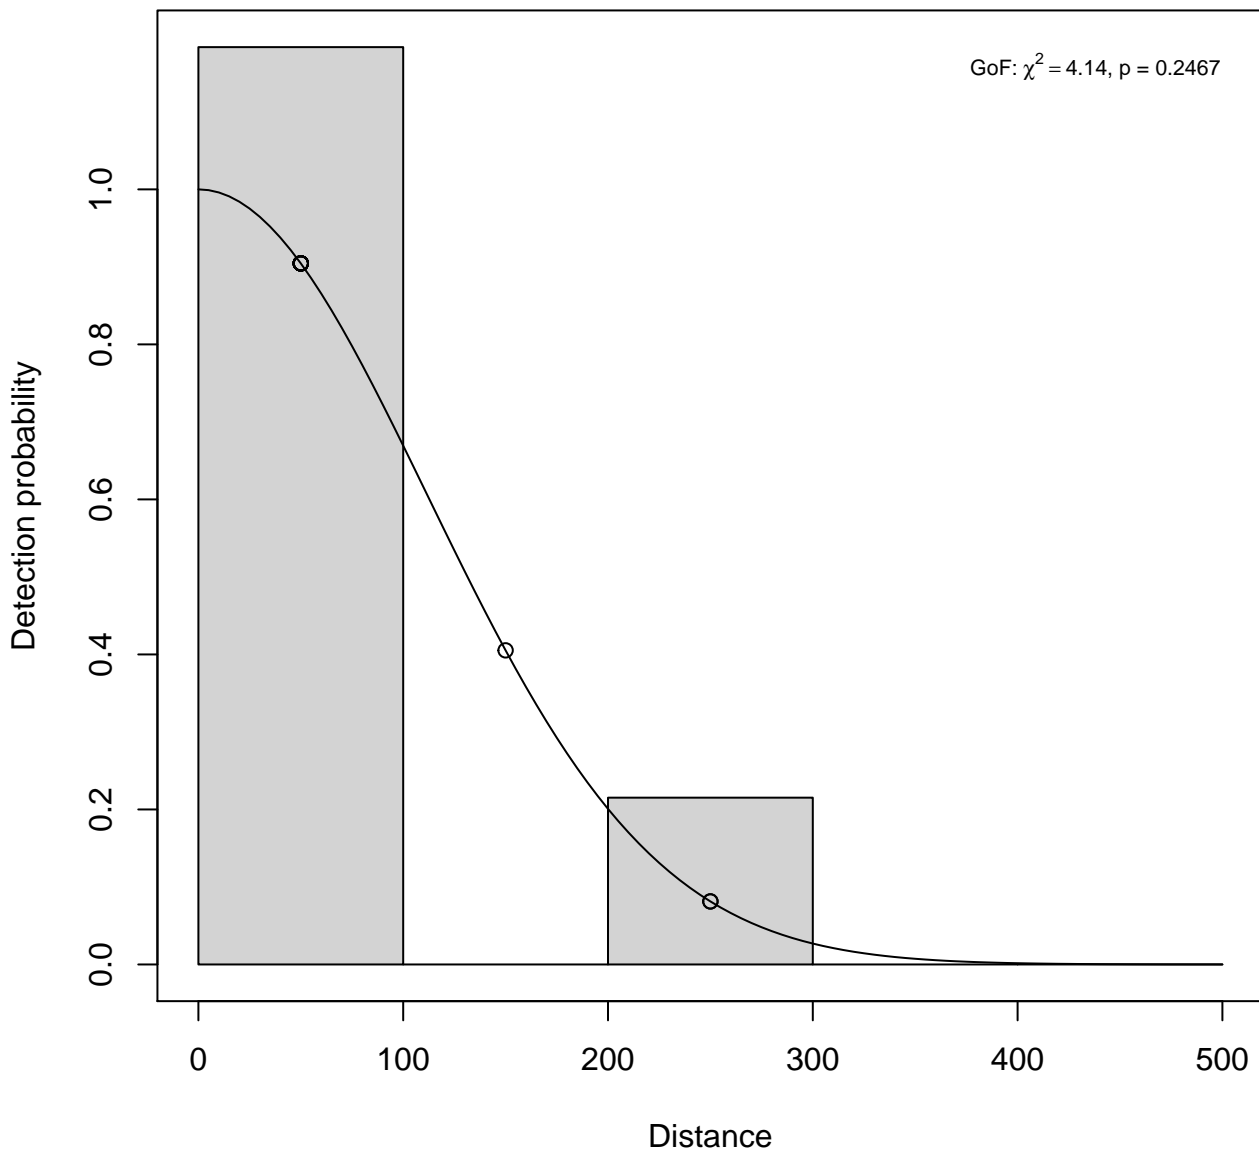

Supplement: s1 [file s1]
