# Supplementary material
Source: MDPI journal article supplement (https://www.mdpi.com/1424-2818/13/7/300)

# ***Psittacara leucophthalmus* – Madeira–Tapajos moist forests – Brazil**

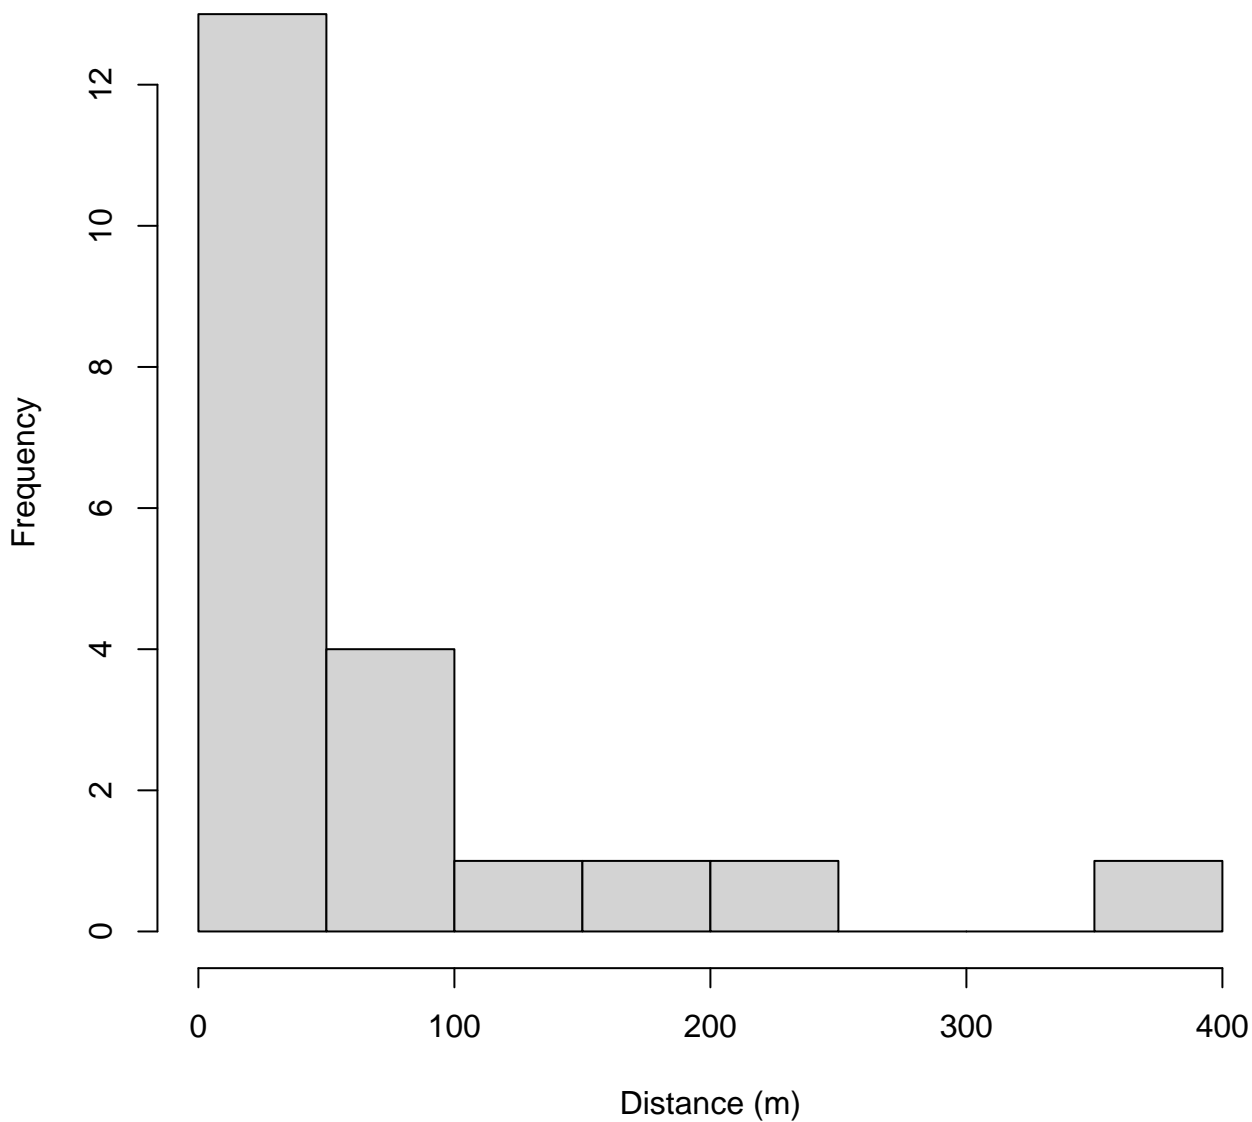

# Psittacara leucophthalmus – Madeira–Tapajos moist forests – Brazil

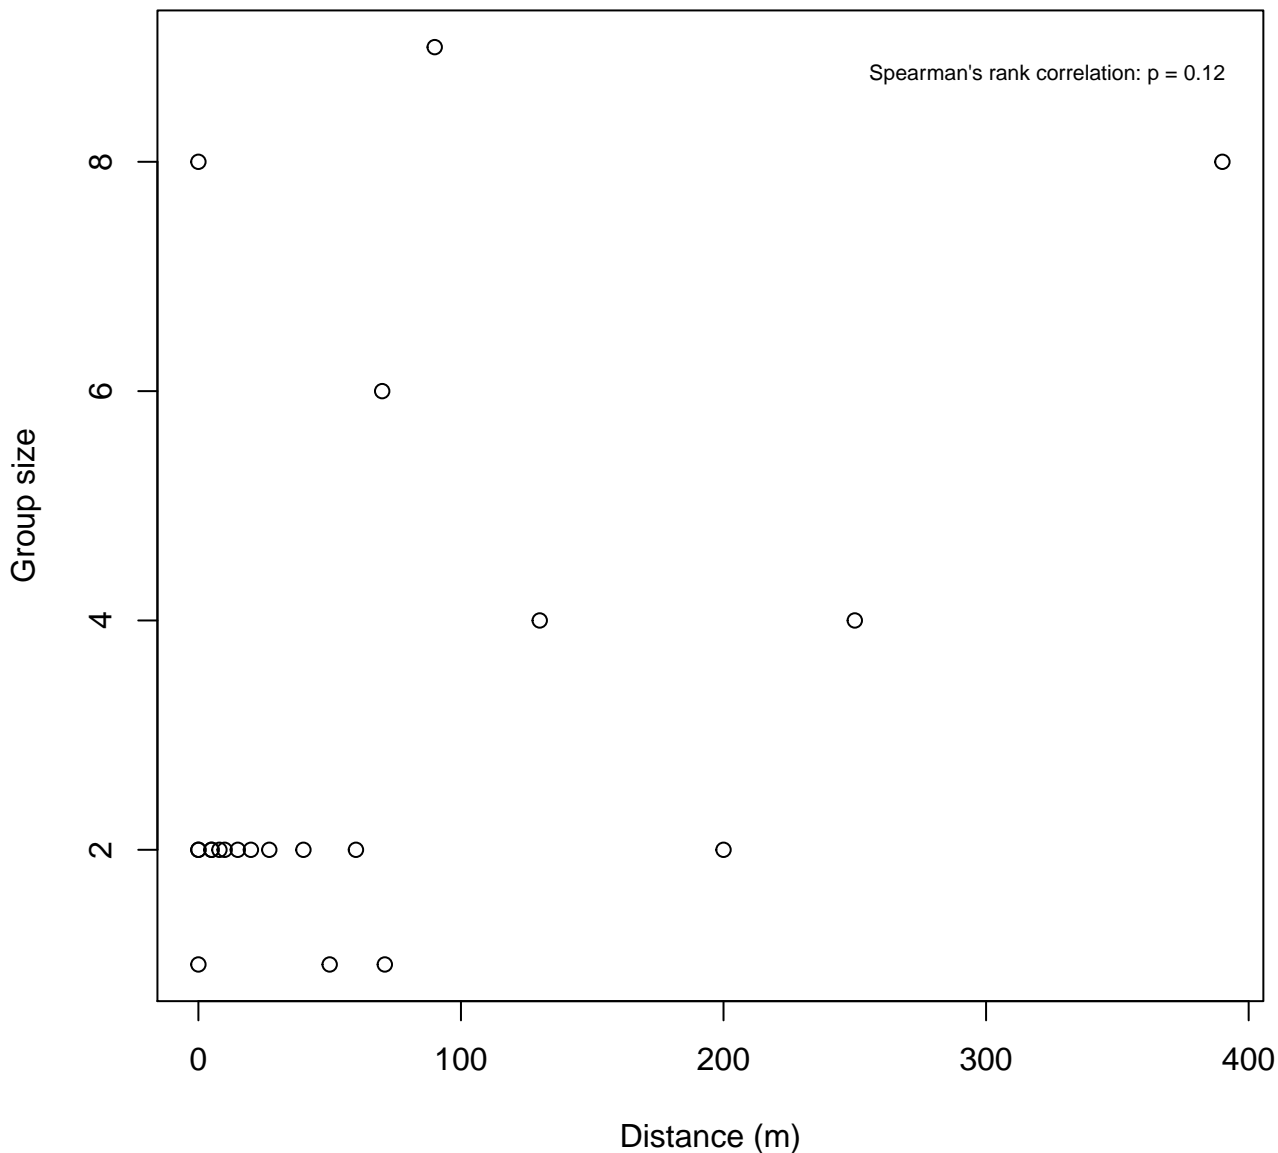

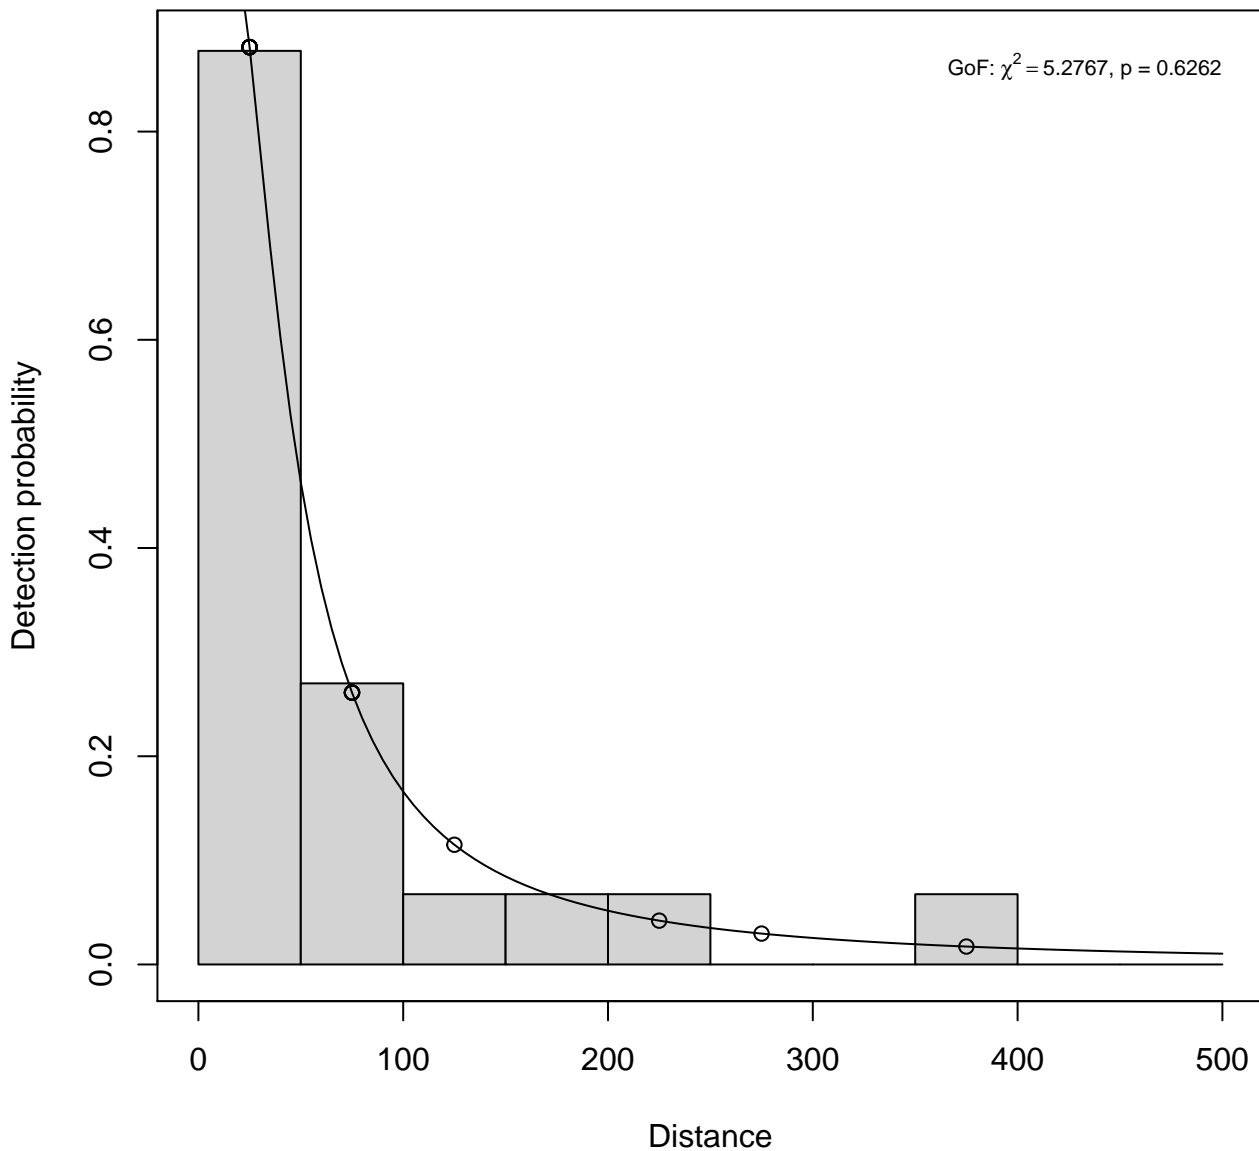

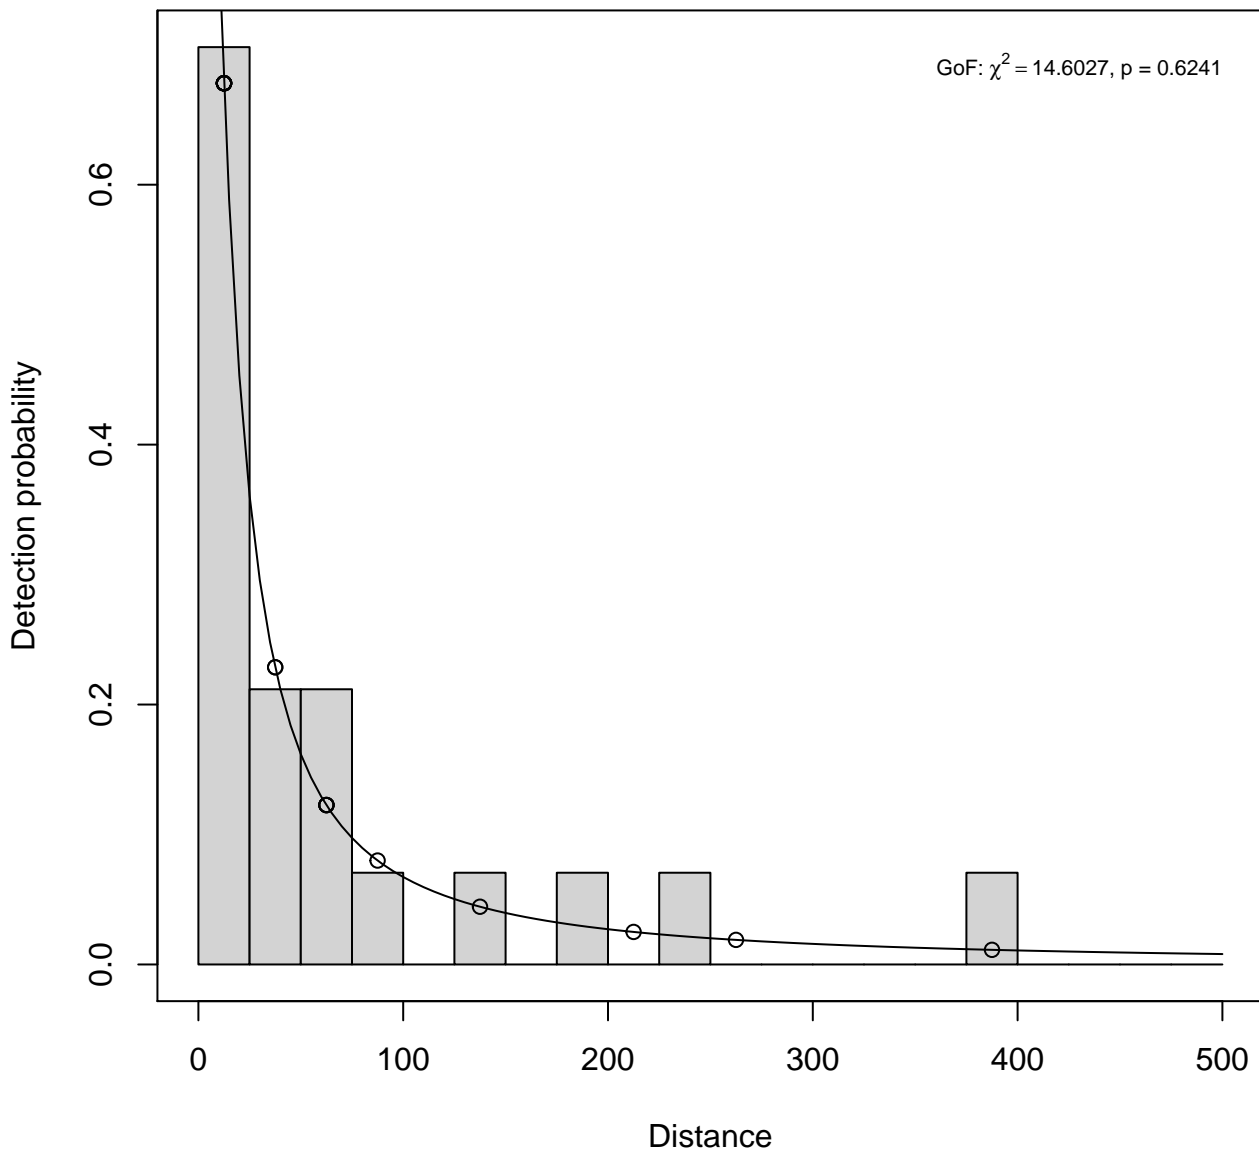

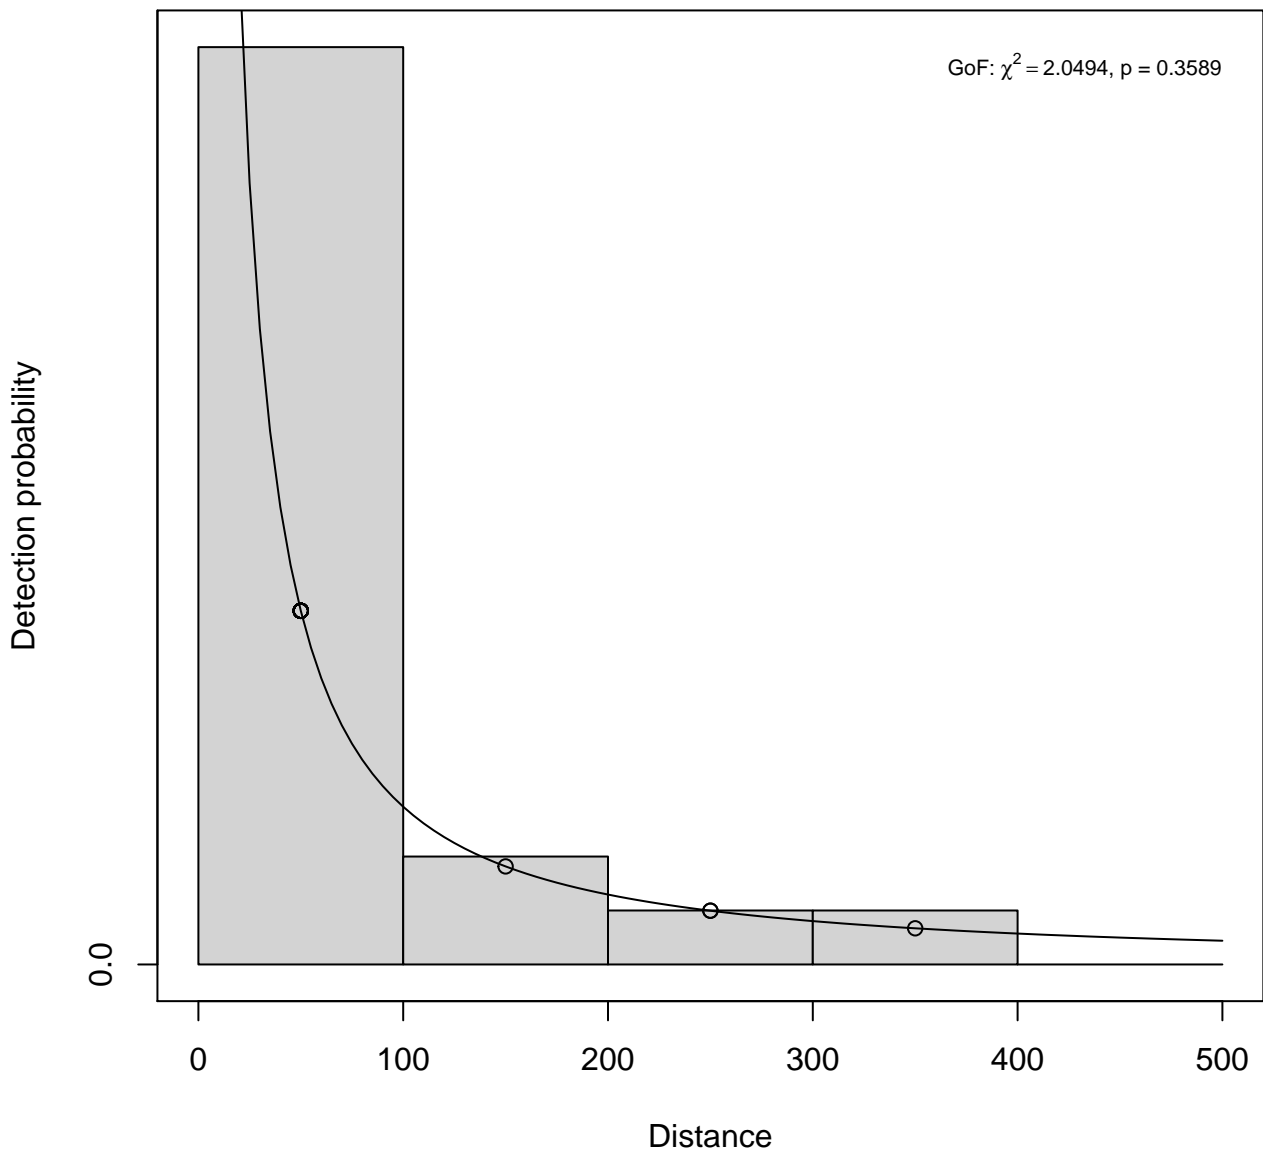

Supplement: s1 [file s1]
