# Supplementary material
Source: MDPI journal article supplement (https://www.mdpi.com/1424-2818/13/7/300)

# **Psittacara mitratus – Dry Chaco – Bolivia**

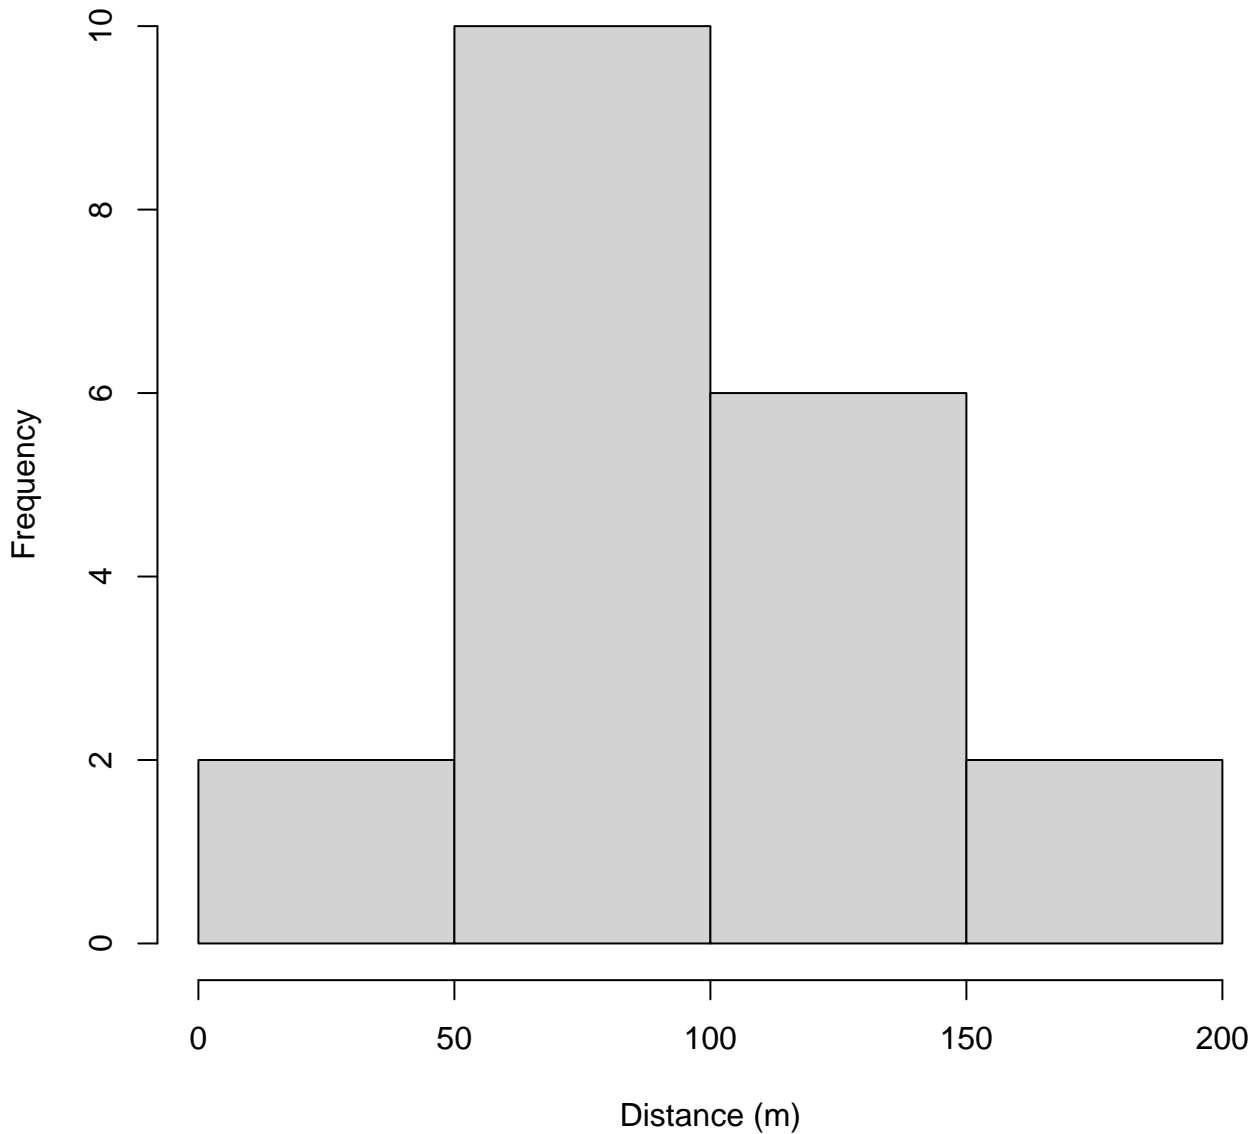

# **Psittacara mitratus – Dry Chaco – Bolivia**

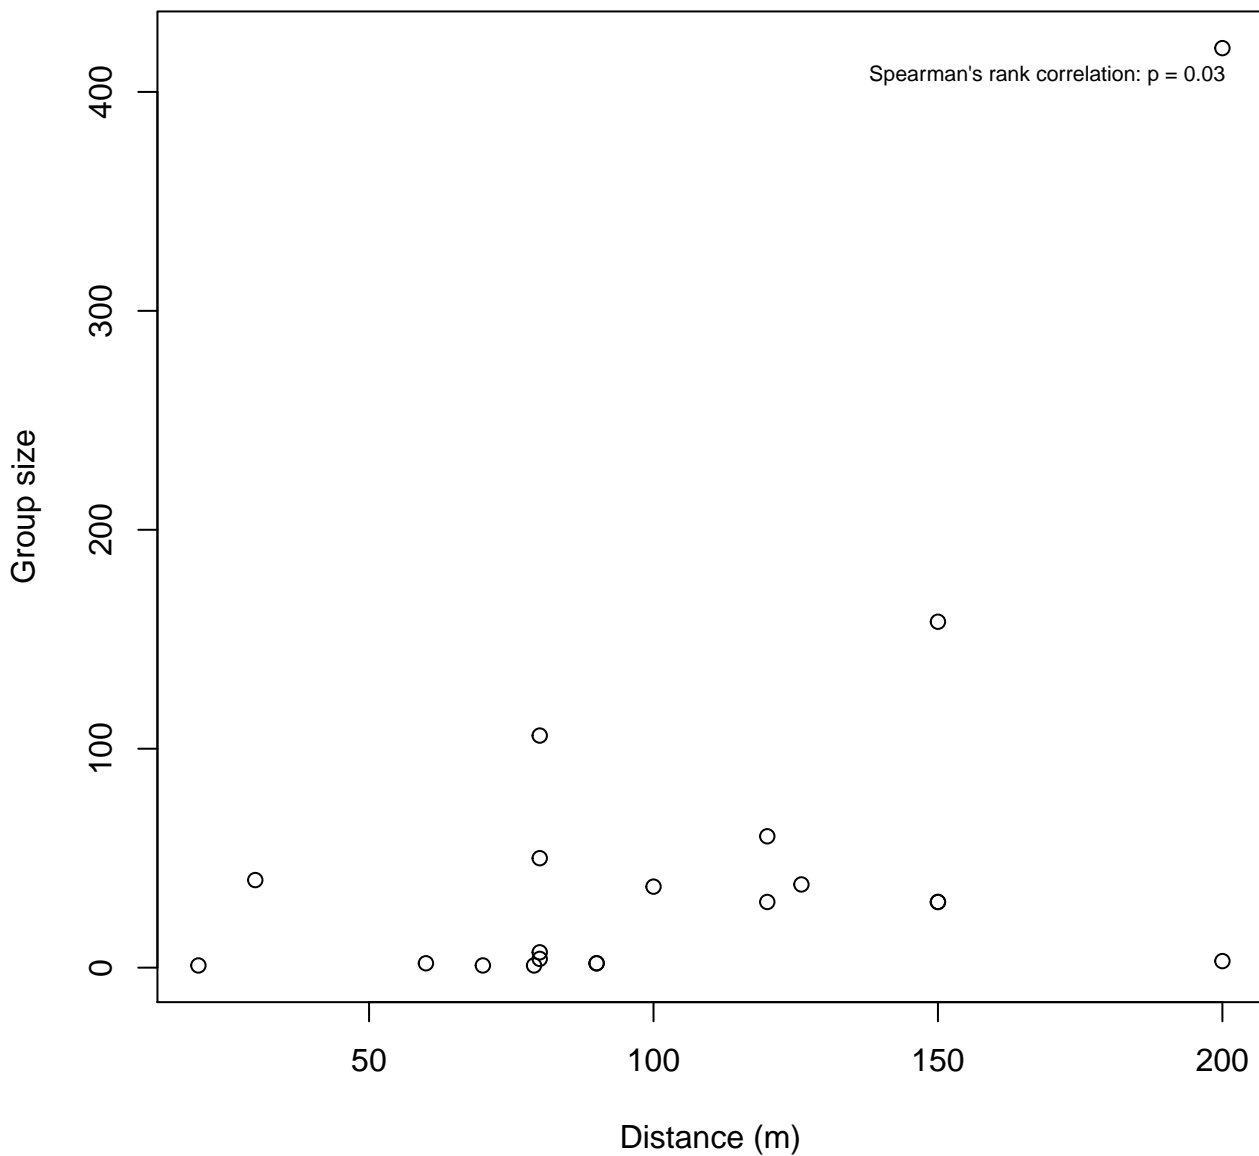

Psittacara mitratus – Dry Chaco – Bolivia (N = 20, key function = hn)

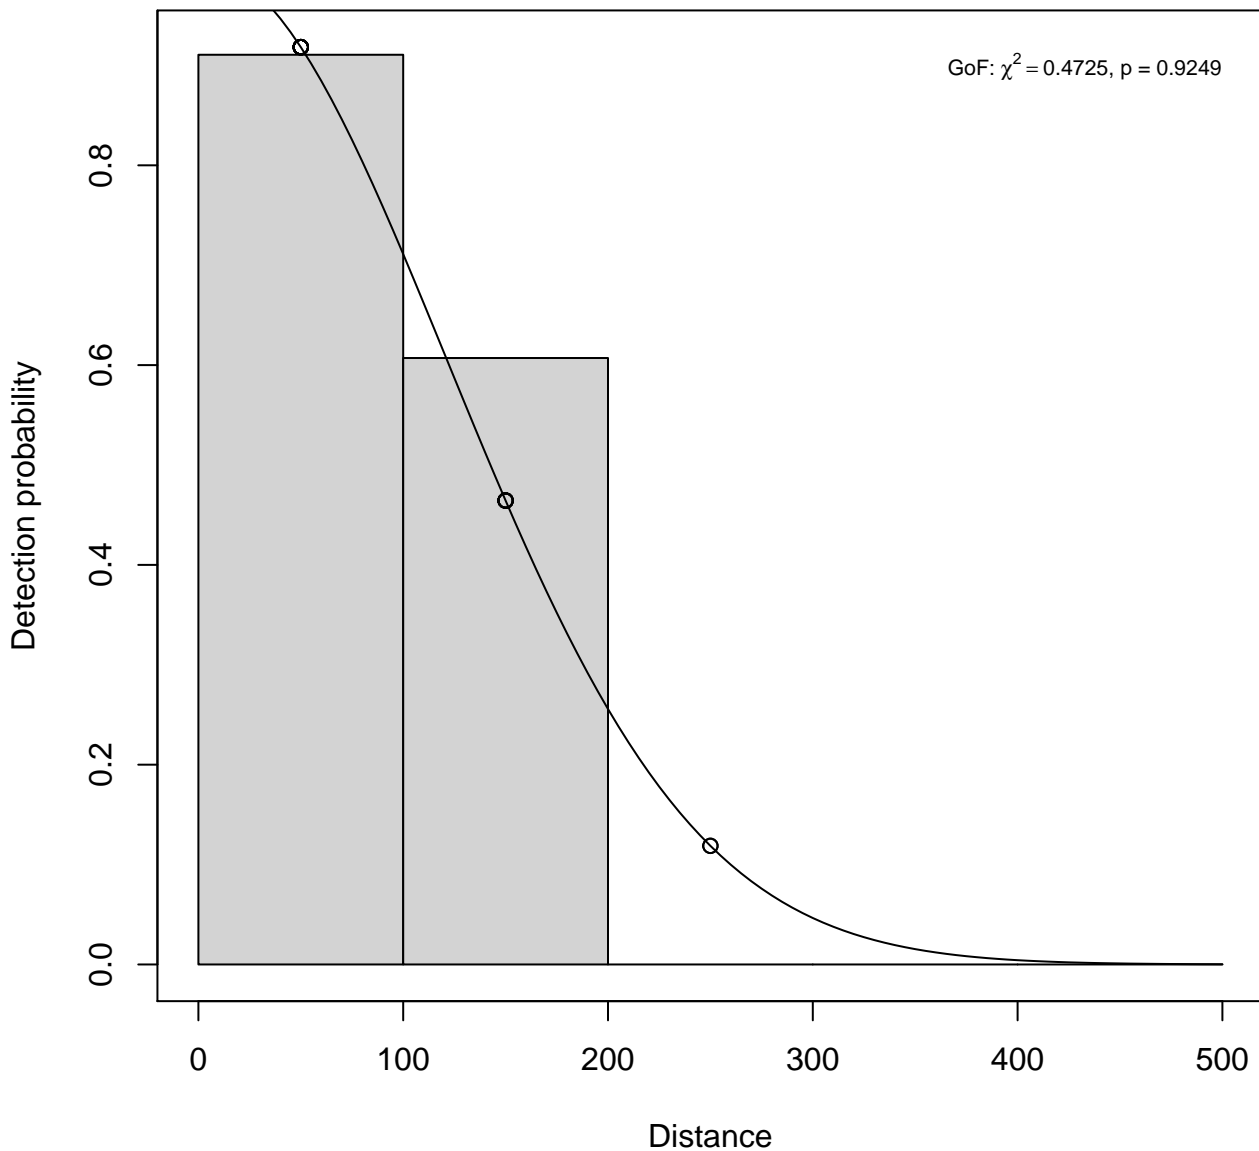

Psittacara mitratus – Dry Chaco – Bolivia (N = 20, key function = hr)

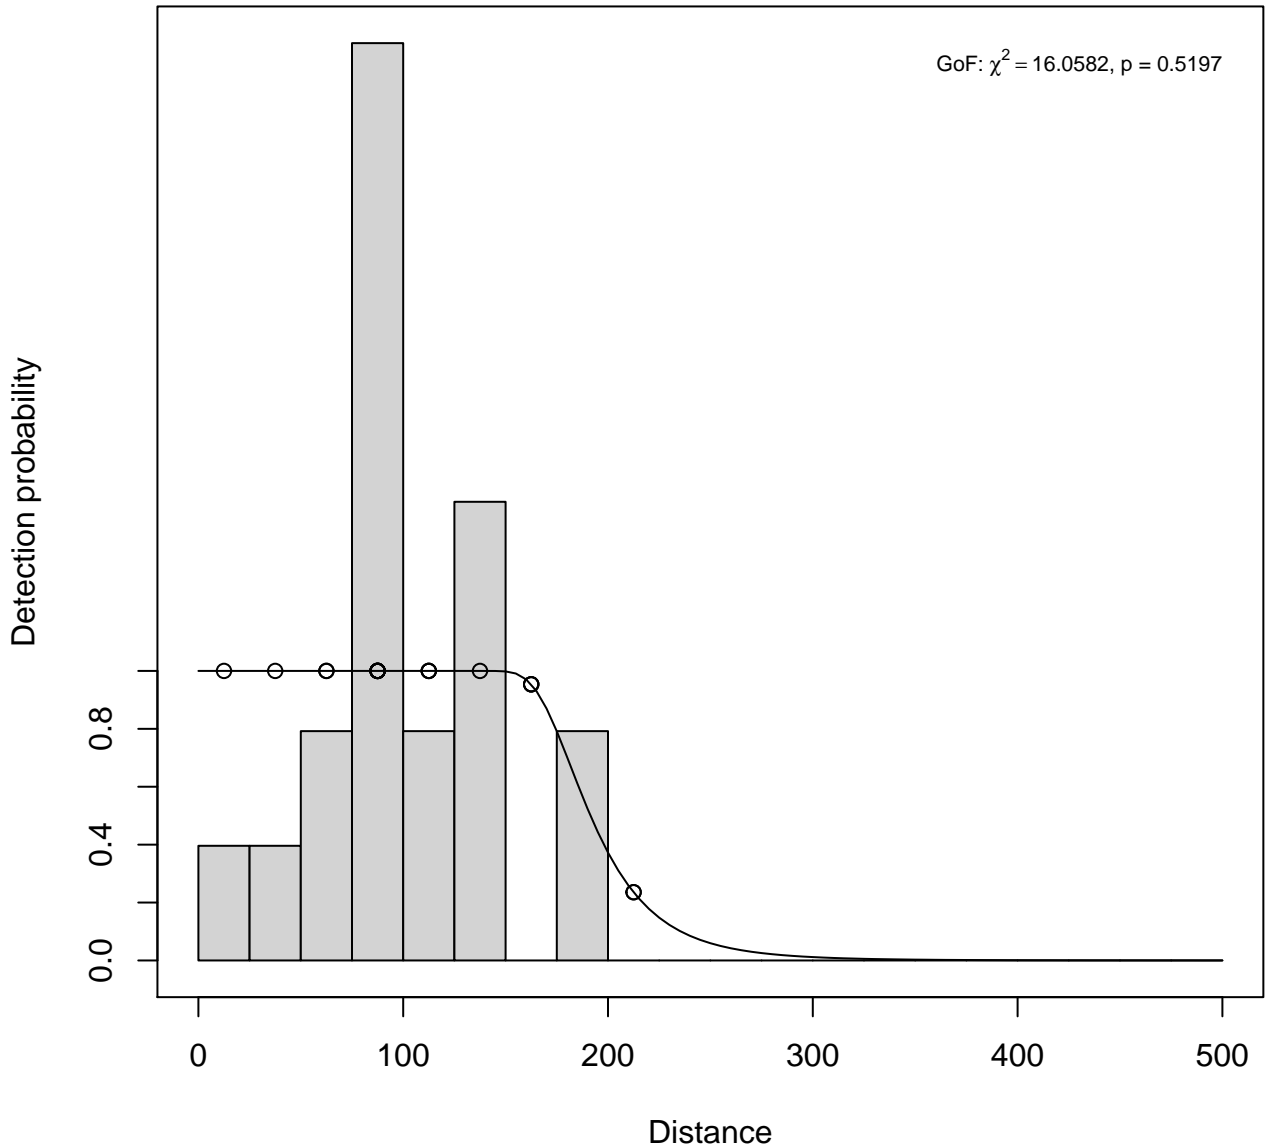

Psittacara mitratus – Dry Chaco – Bolivia (N = 20, key function = hr)

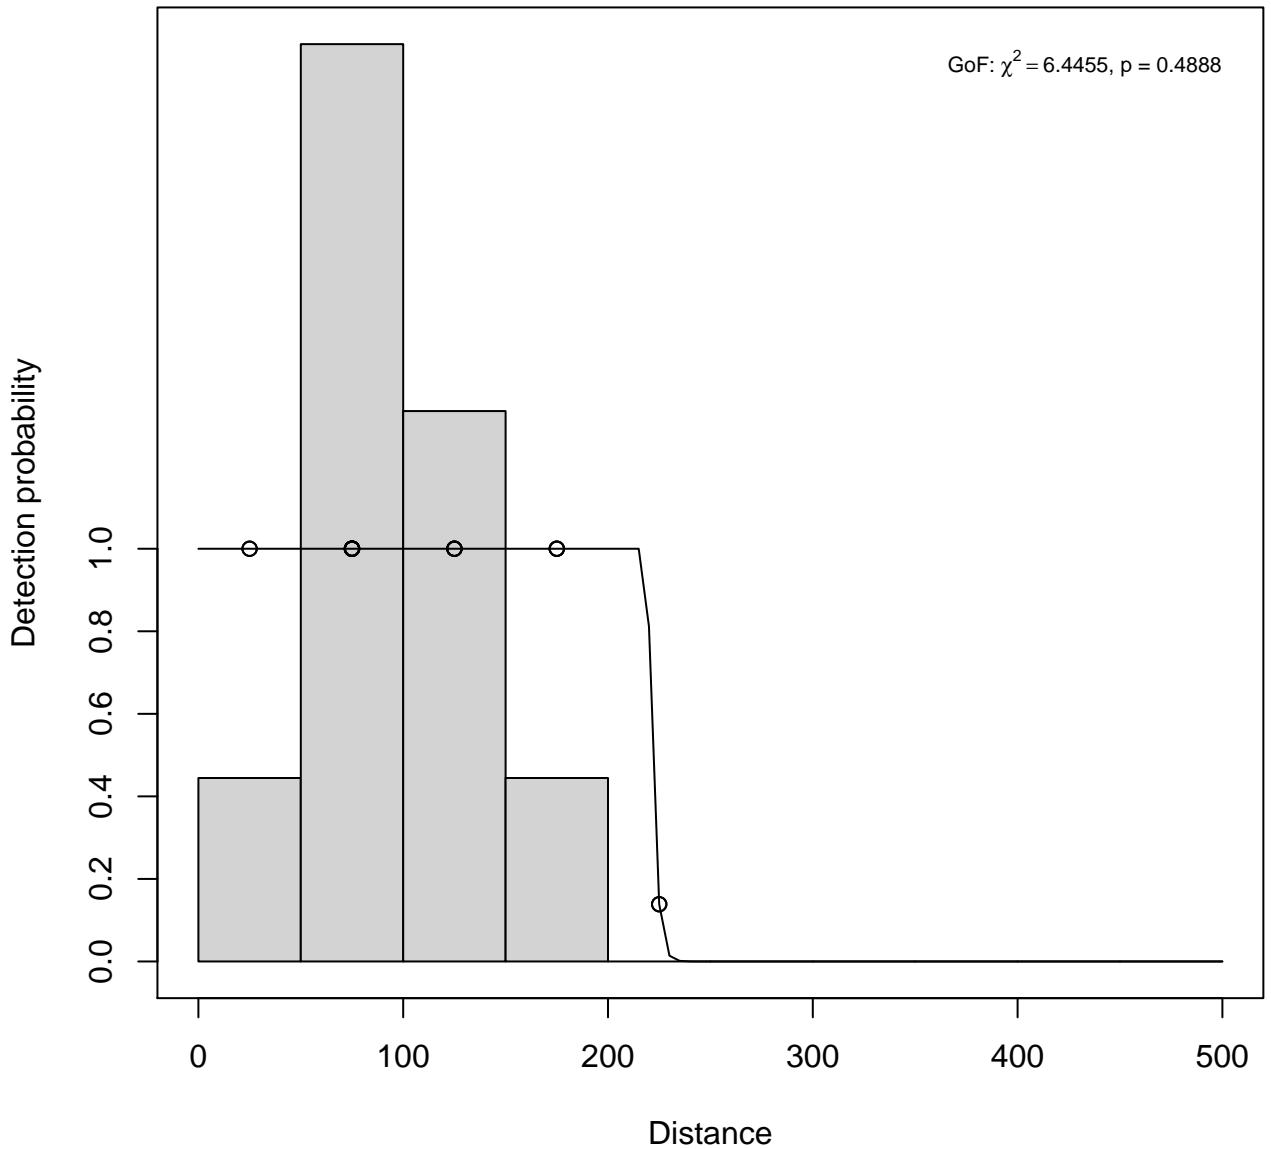

Supplement: s1 [file s1]
