# Supplementary material
Source: MDPI journal article supplement (https://www.mdpi.com/1424-2818/13/7/300)

# **Psittacara leucophthalmus – Chiquitano dry forests – Bolivia**

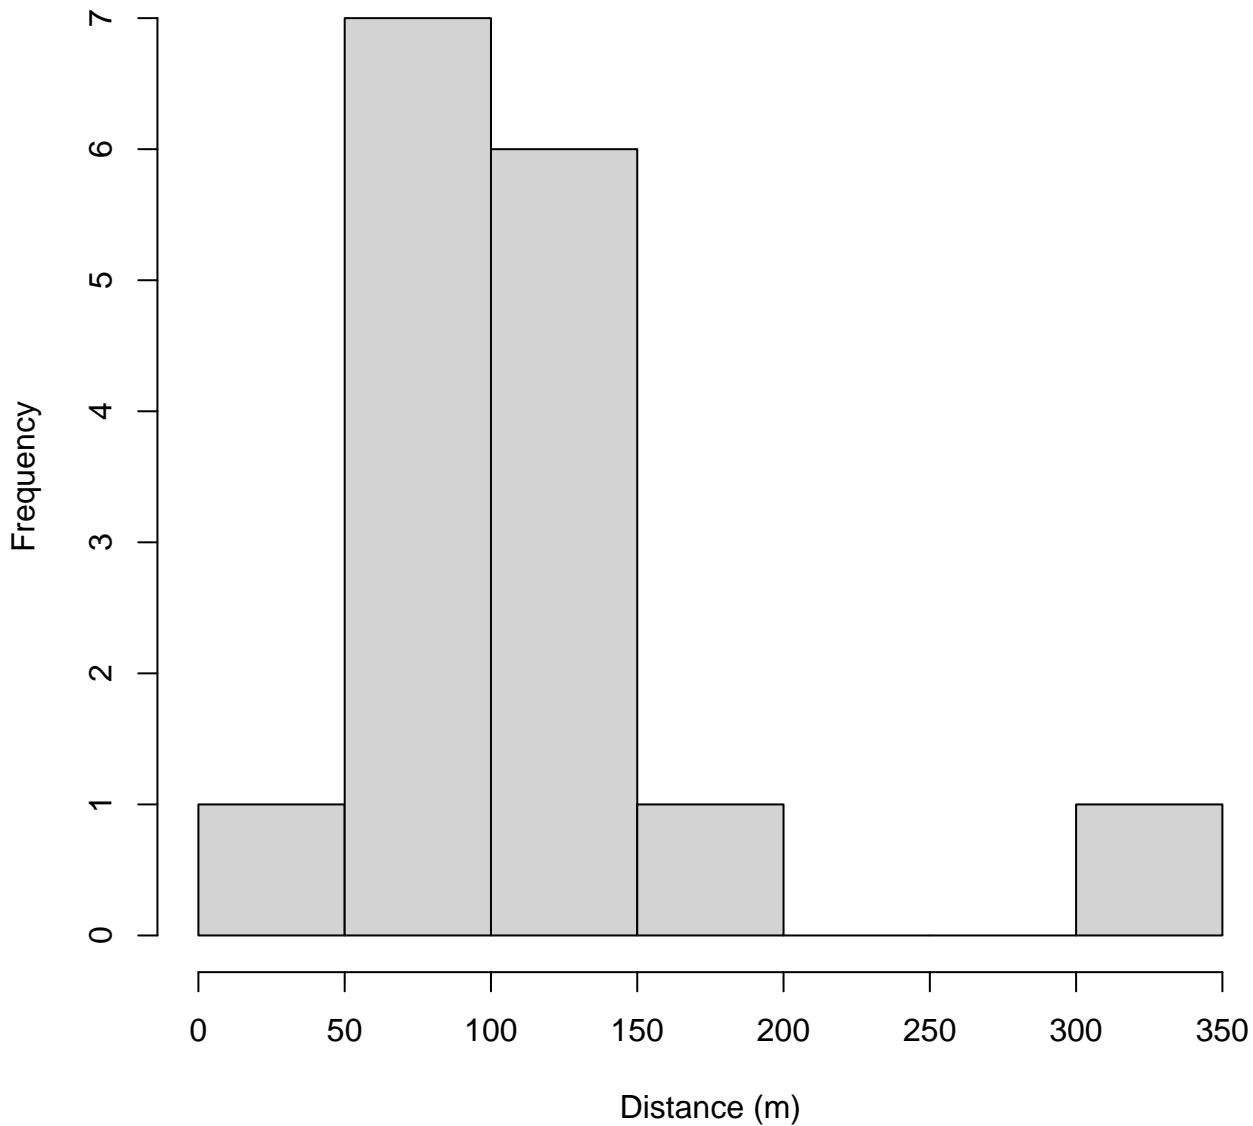

# **Psittacara leucophthalmus – Chiquitano dry forests – Bolivia**

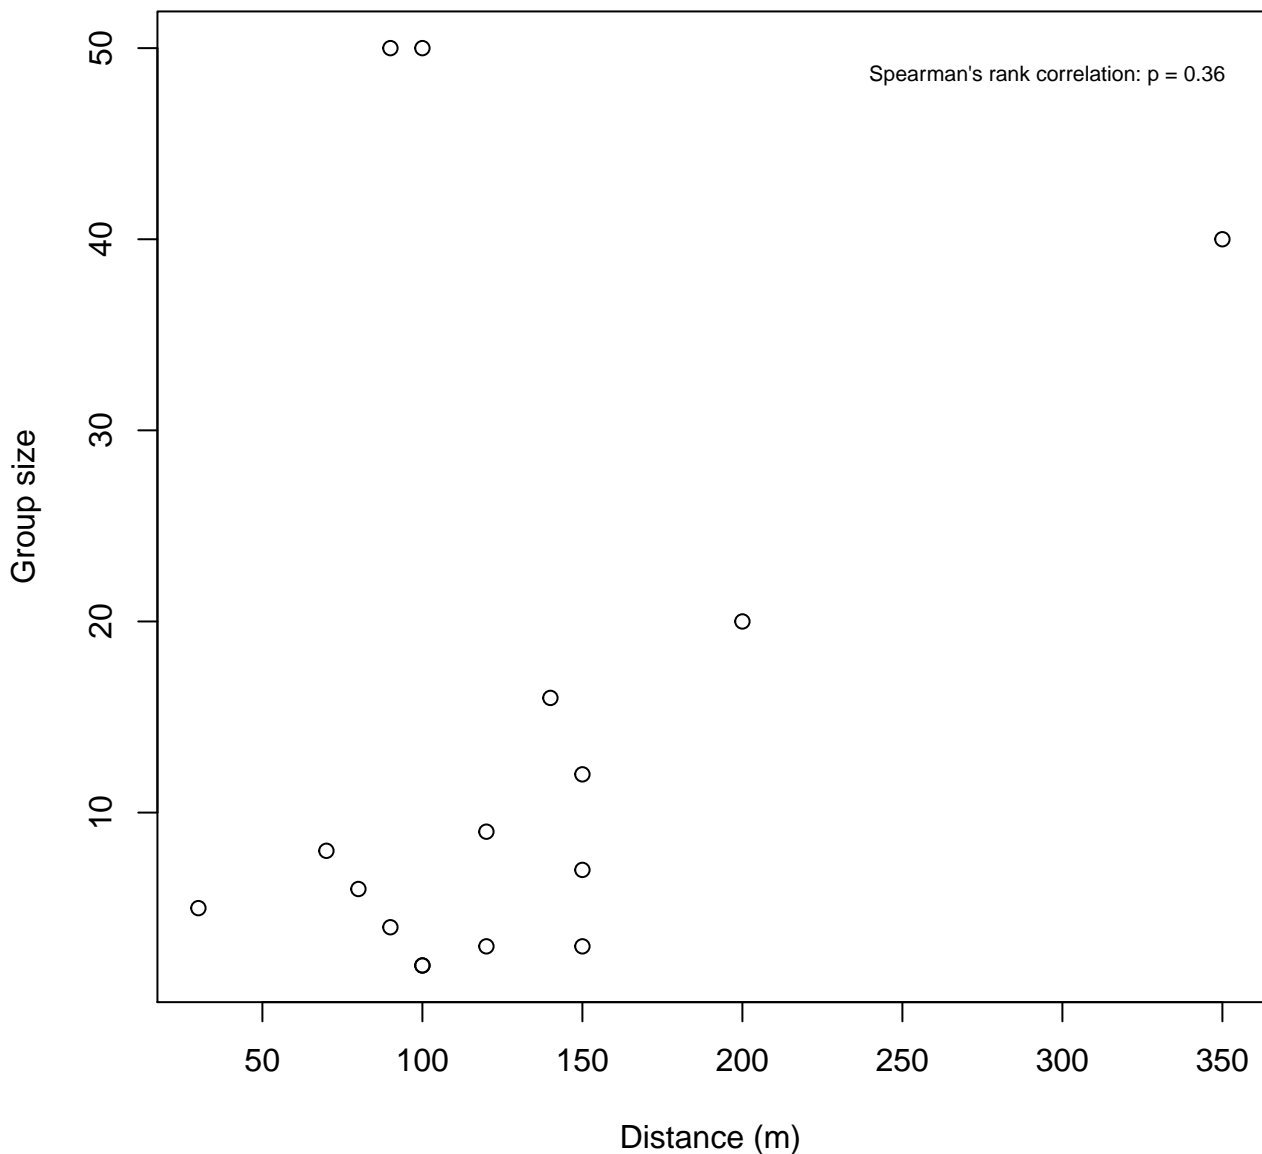

*Psittacara leucophthalmus* – Chiquitano dry forests – Bolivia (N = 16, key function = hr)

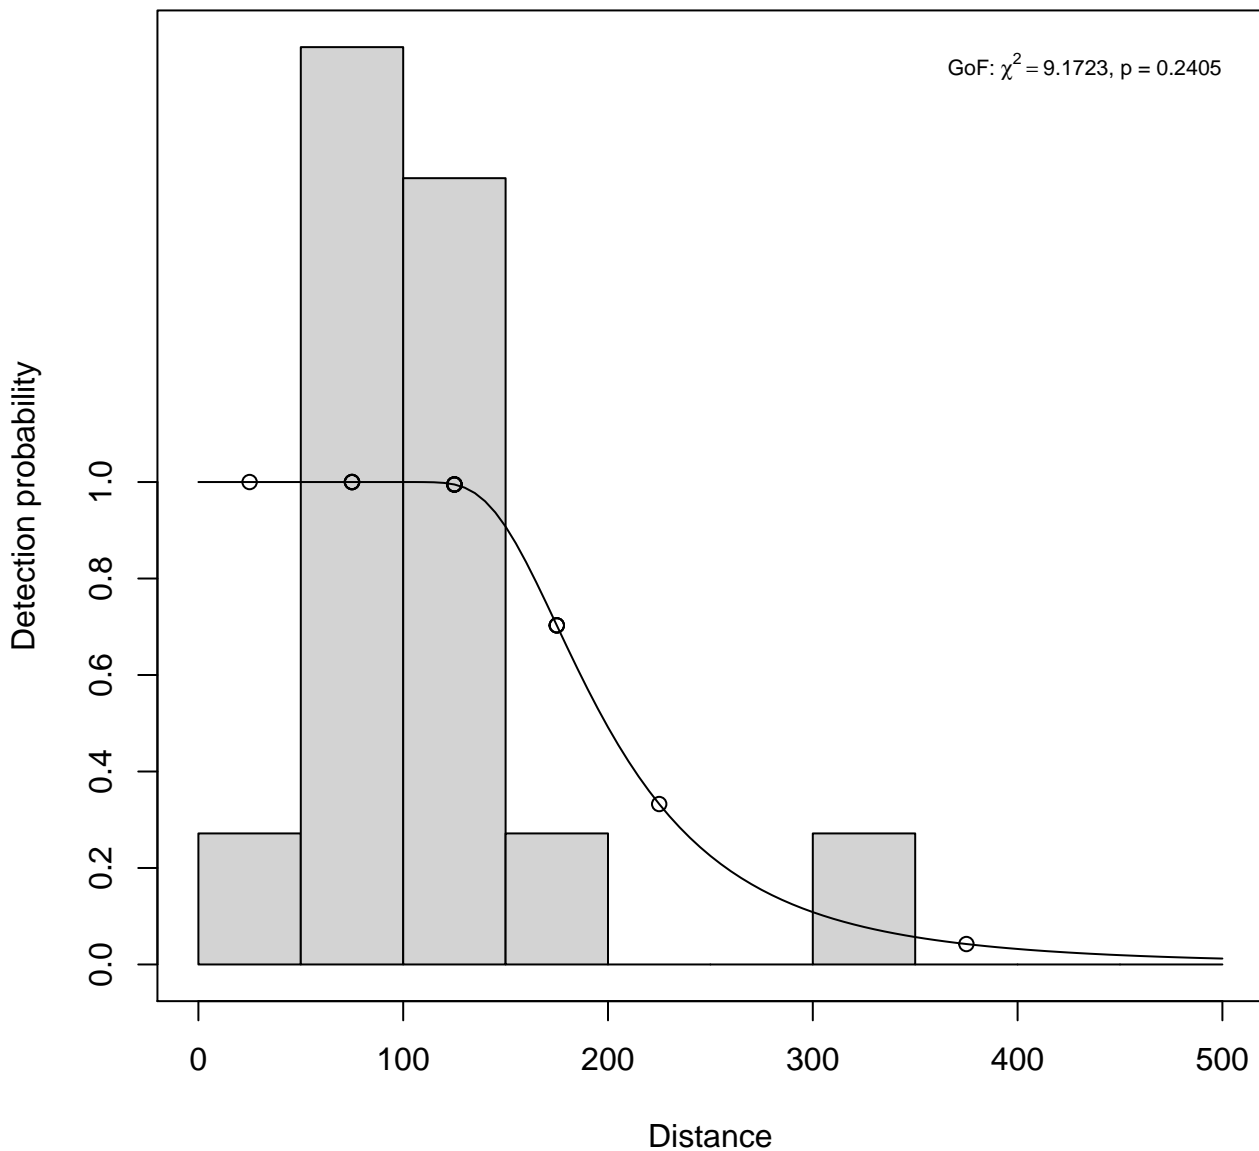

*Psittacara leucophthalmus* – Chiquitano dry forests – Bolivia (N = 16, key function = hn)

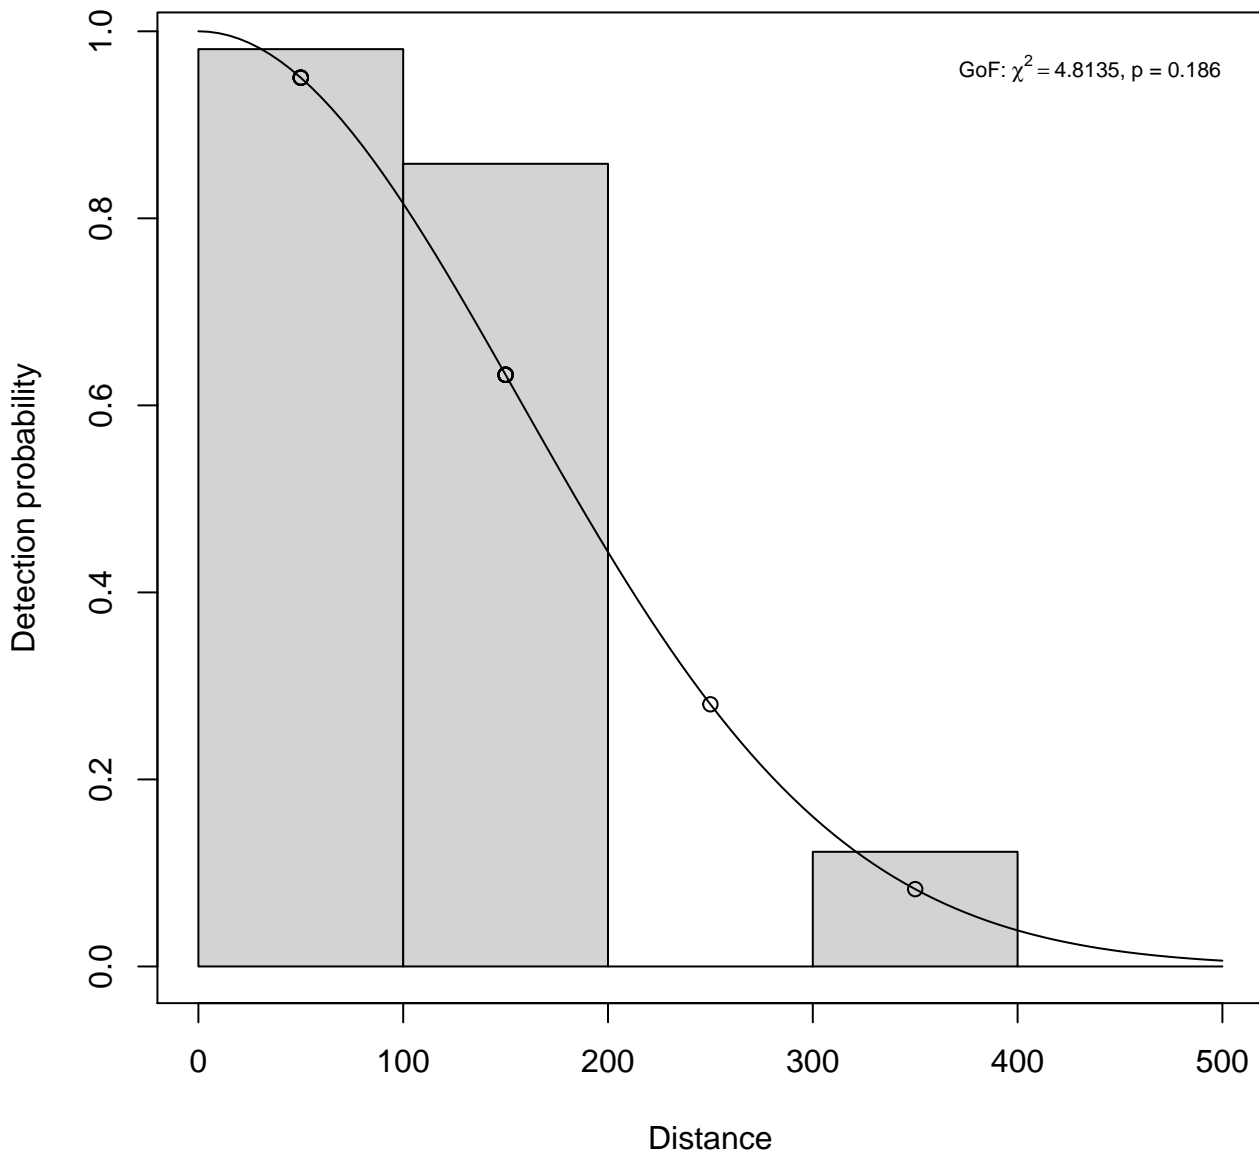

*Psittacara leucophthalmus* – Chiquitano dry forests – Bolivia (N = 16, key function = hr)

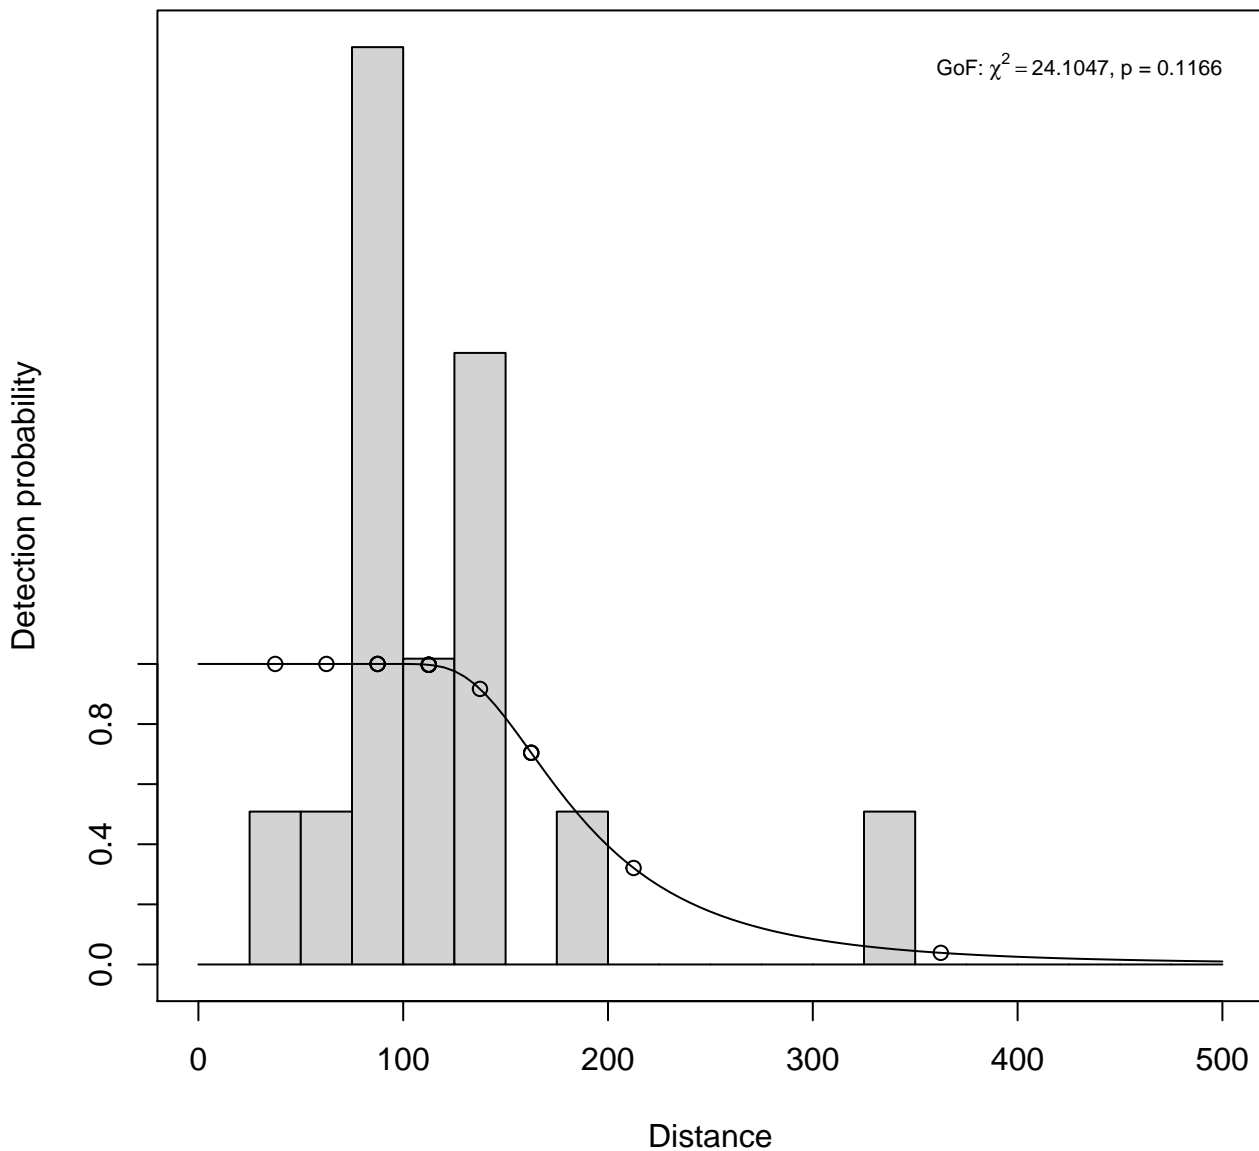

Supplement: s1 [file s1]
