# Supplementary material
Source: MDPI journal article supplement (https://www.mdpi.com/1424-2818/13/7/300)

# Brotogetis pyrrhoptera – Western Ecuador moist forests – Ecuador

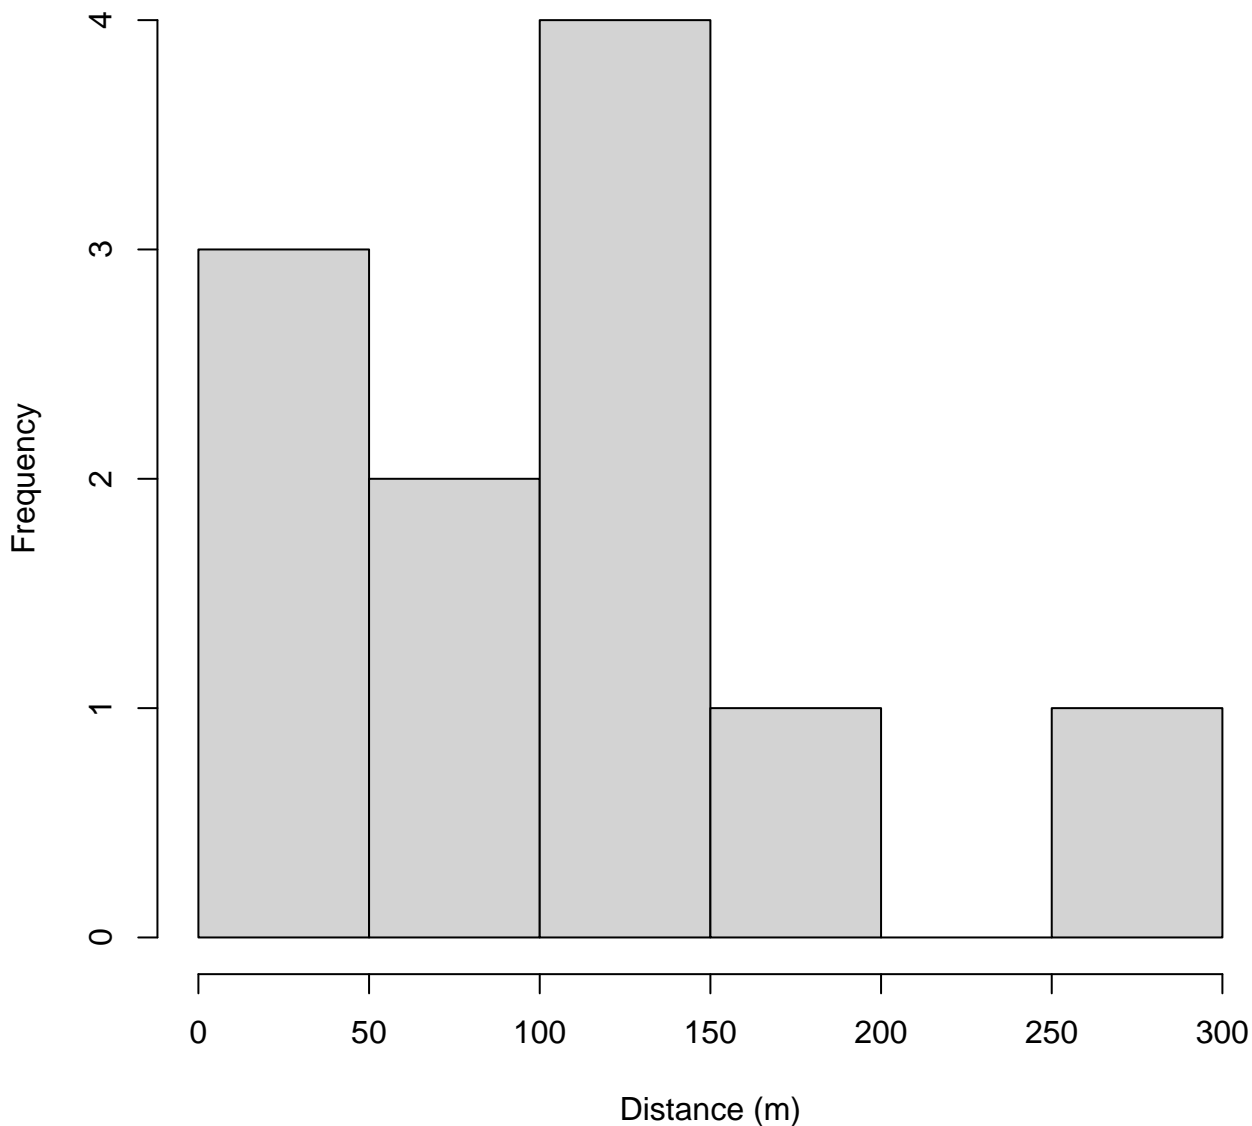

# **Brotogetis pyrrhoptera – Western Ecuador moist forests – Ecuador**

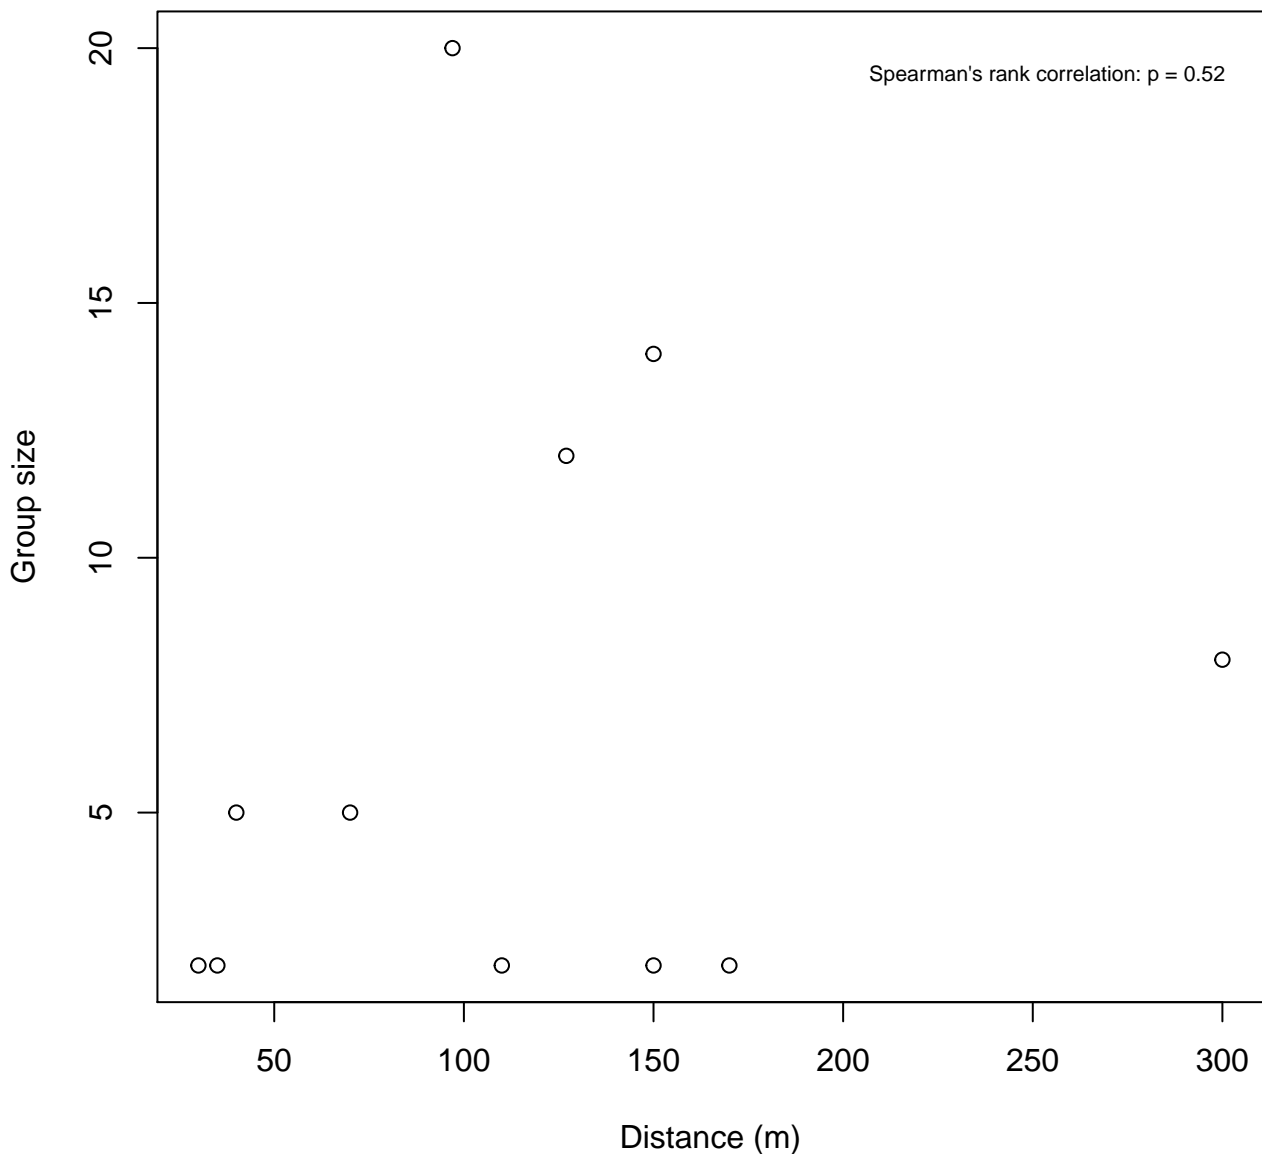

Brotogeris pyrrhoptera – Western Ecuador moist forests – Ecuador (N = 11, key function = hn)

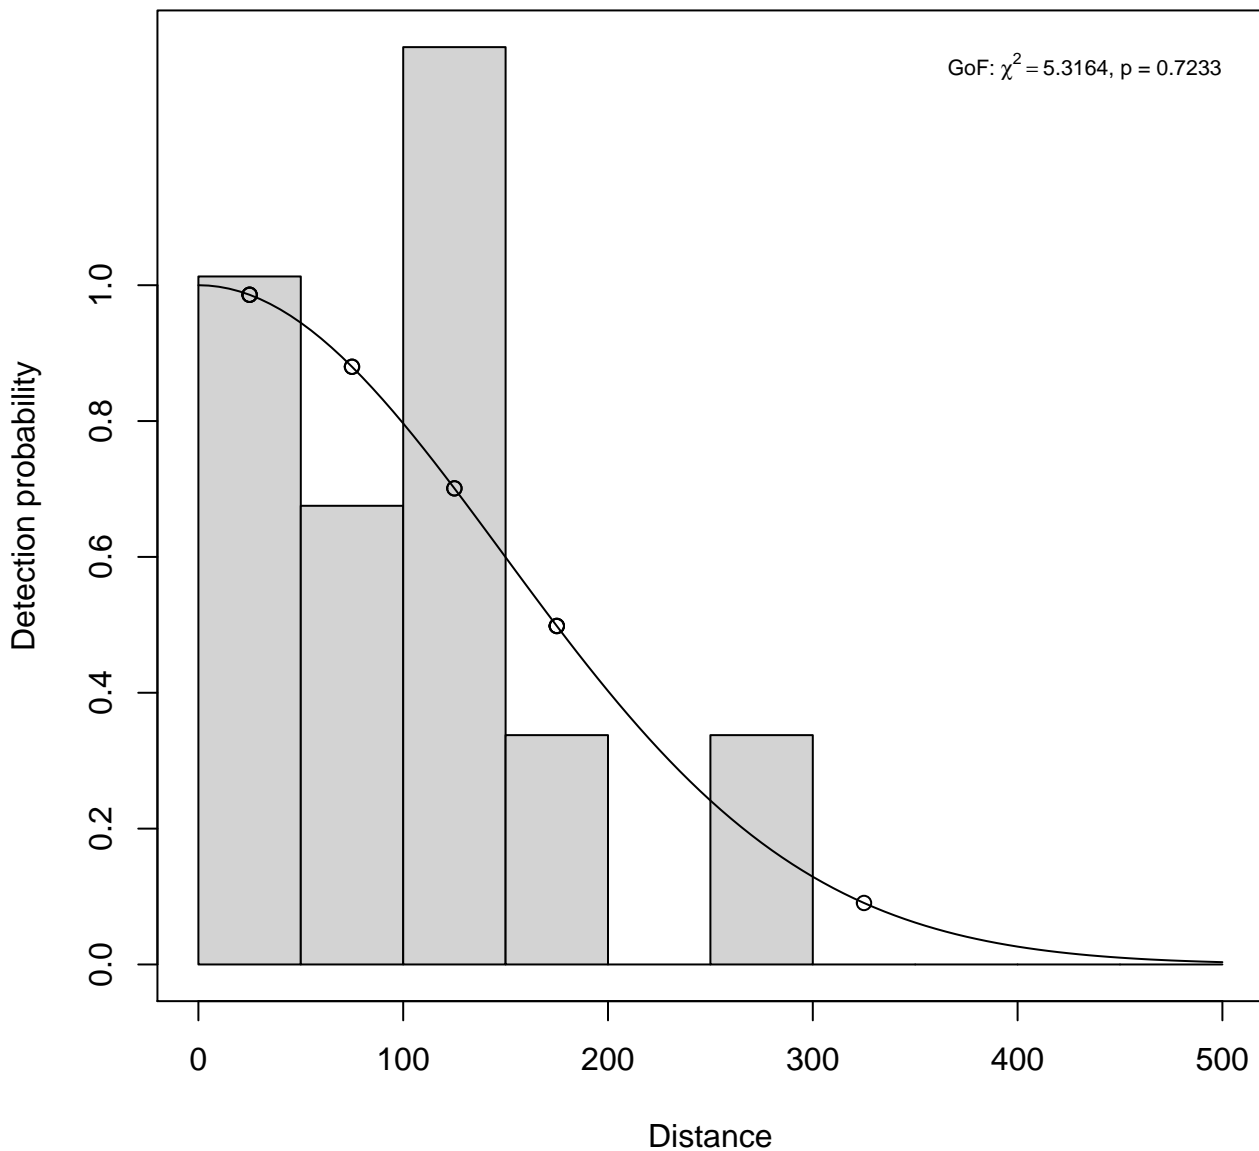

Brotogeris pyrrhoptera – Western Ecuador moist forests – Ecuador (N = 11, key function = hn)

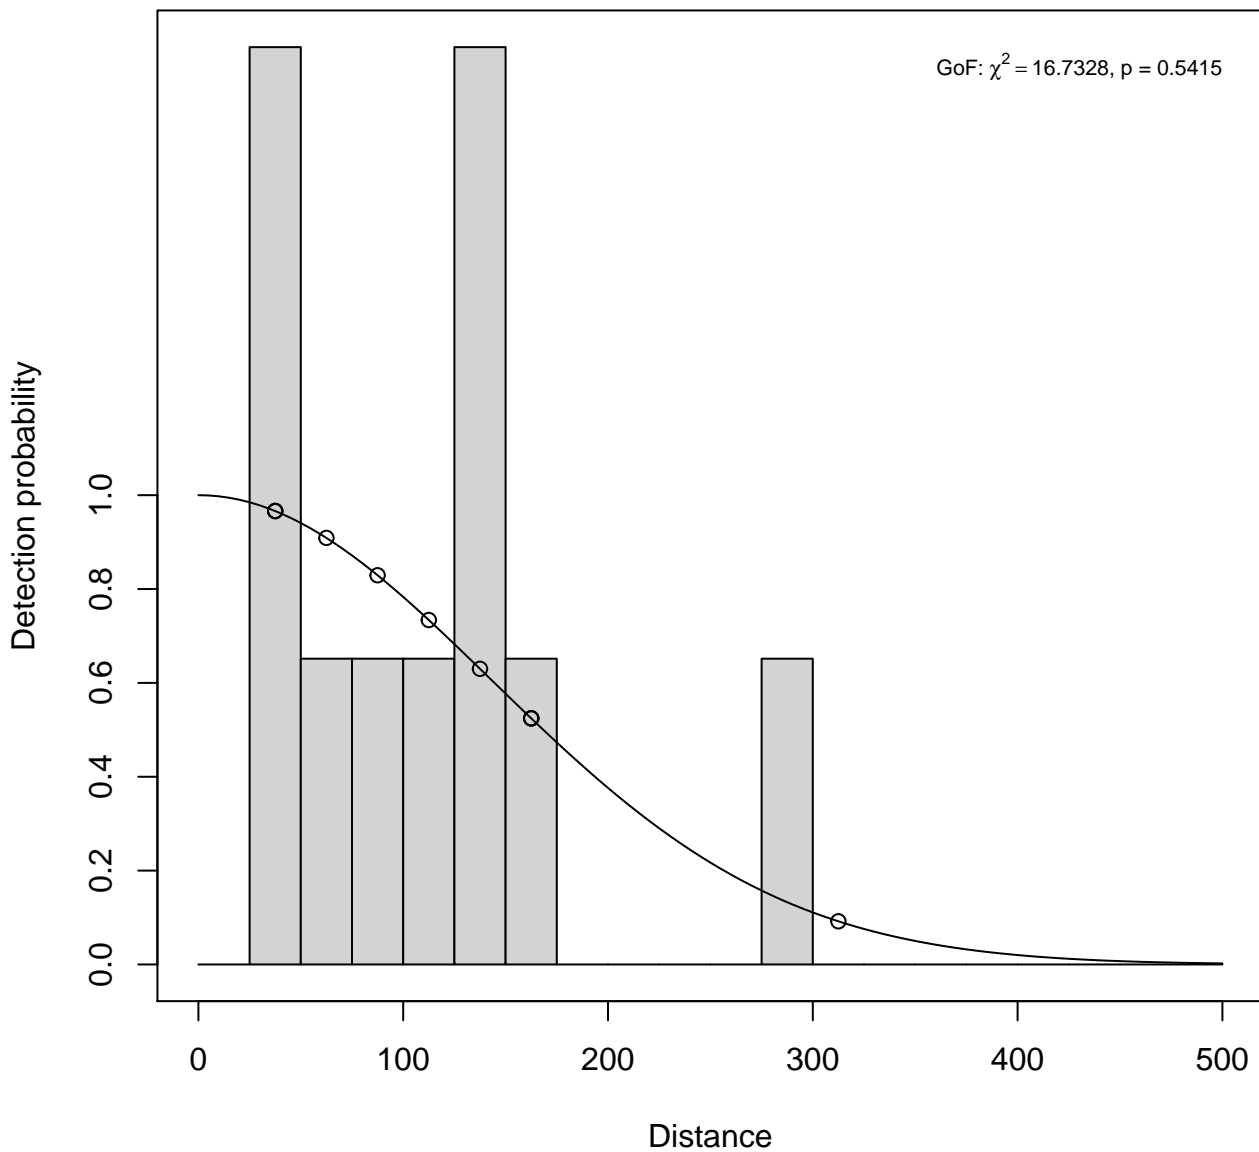

Brotogeris pyrrhoptera – Western Ecuador moist forests – Ecuador (N = 11, key function = hn)

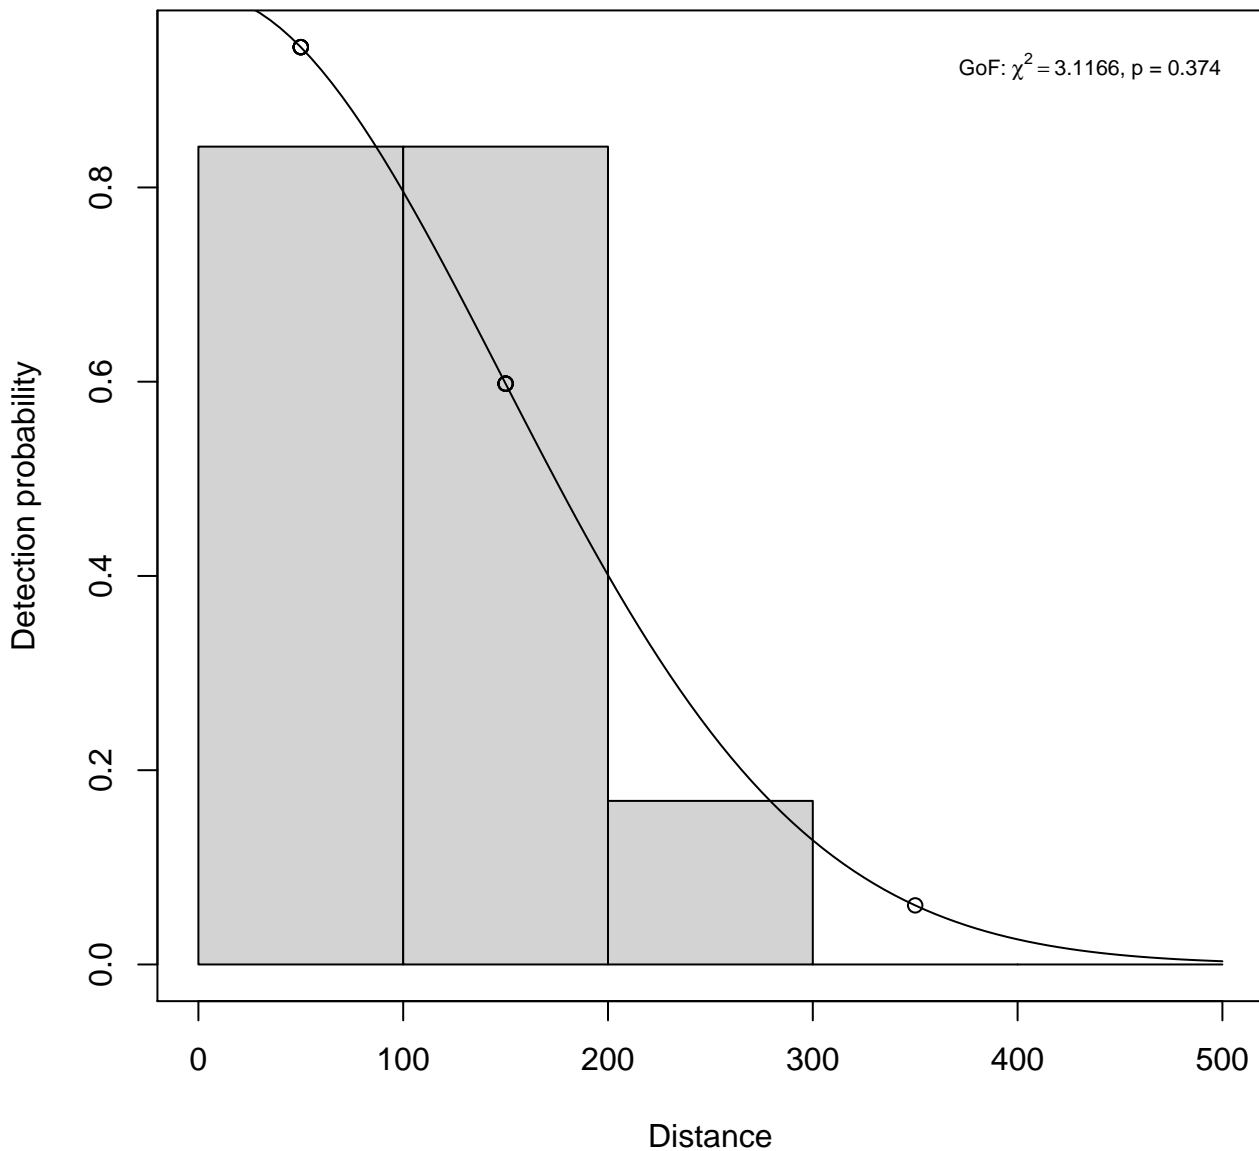

Supplement: s1 [file s1]
