# Supplementary material
Source: MDPI journal article supplement (https://www.mdpi.com/1424-2818/13/7/300)

# Orthopsittaca manilatus – Cerrado – Brazil

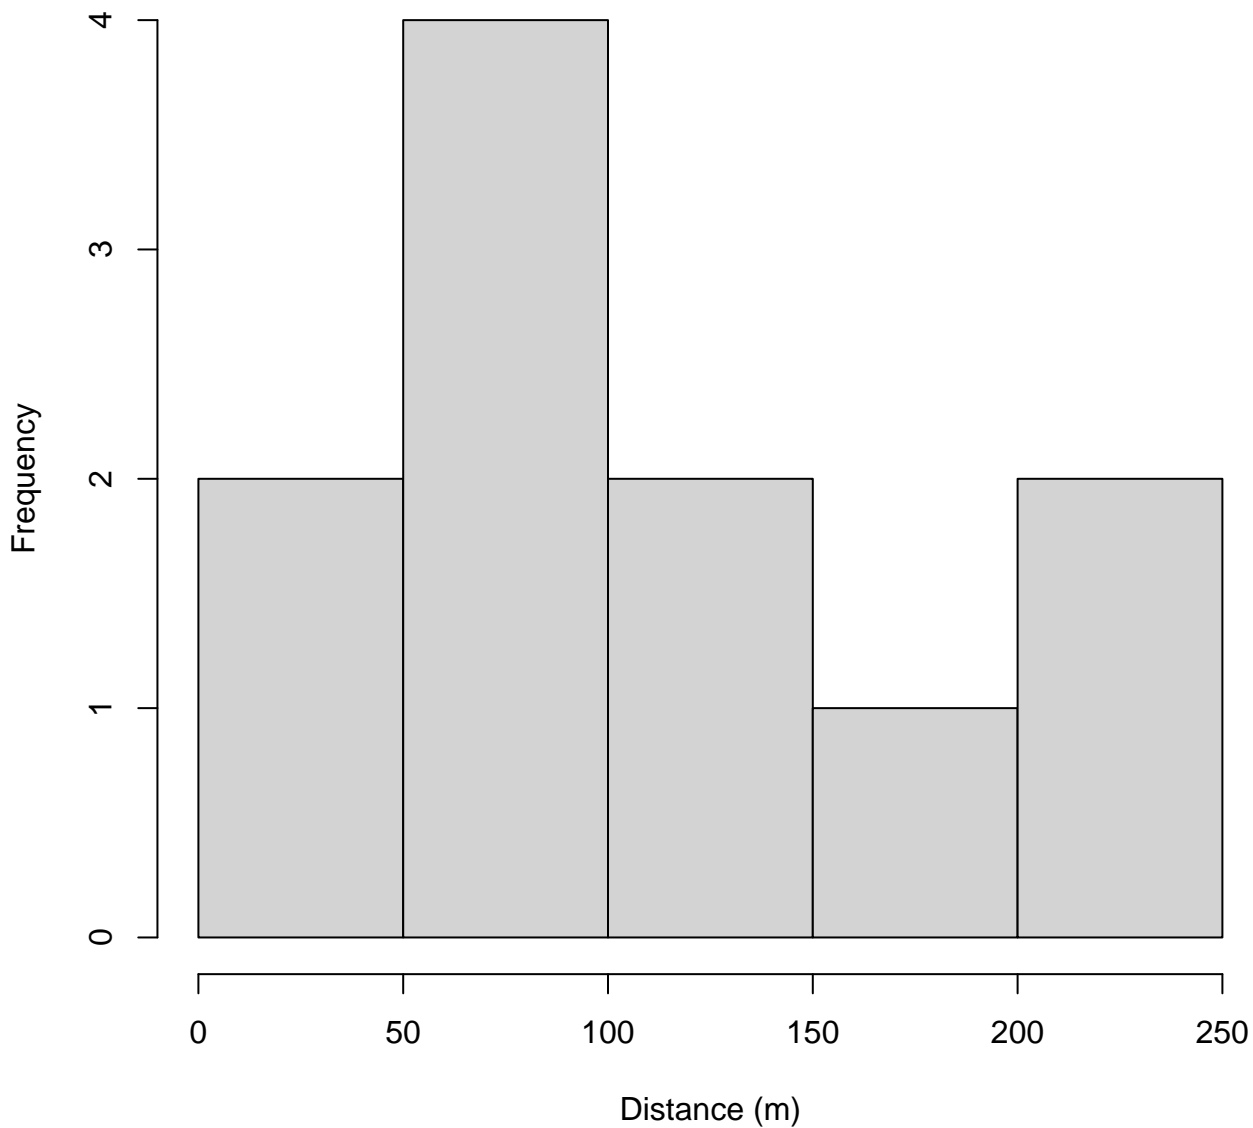

# Orthopsittaca manilatus – Cerrado – Brazil

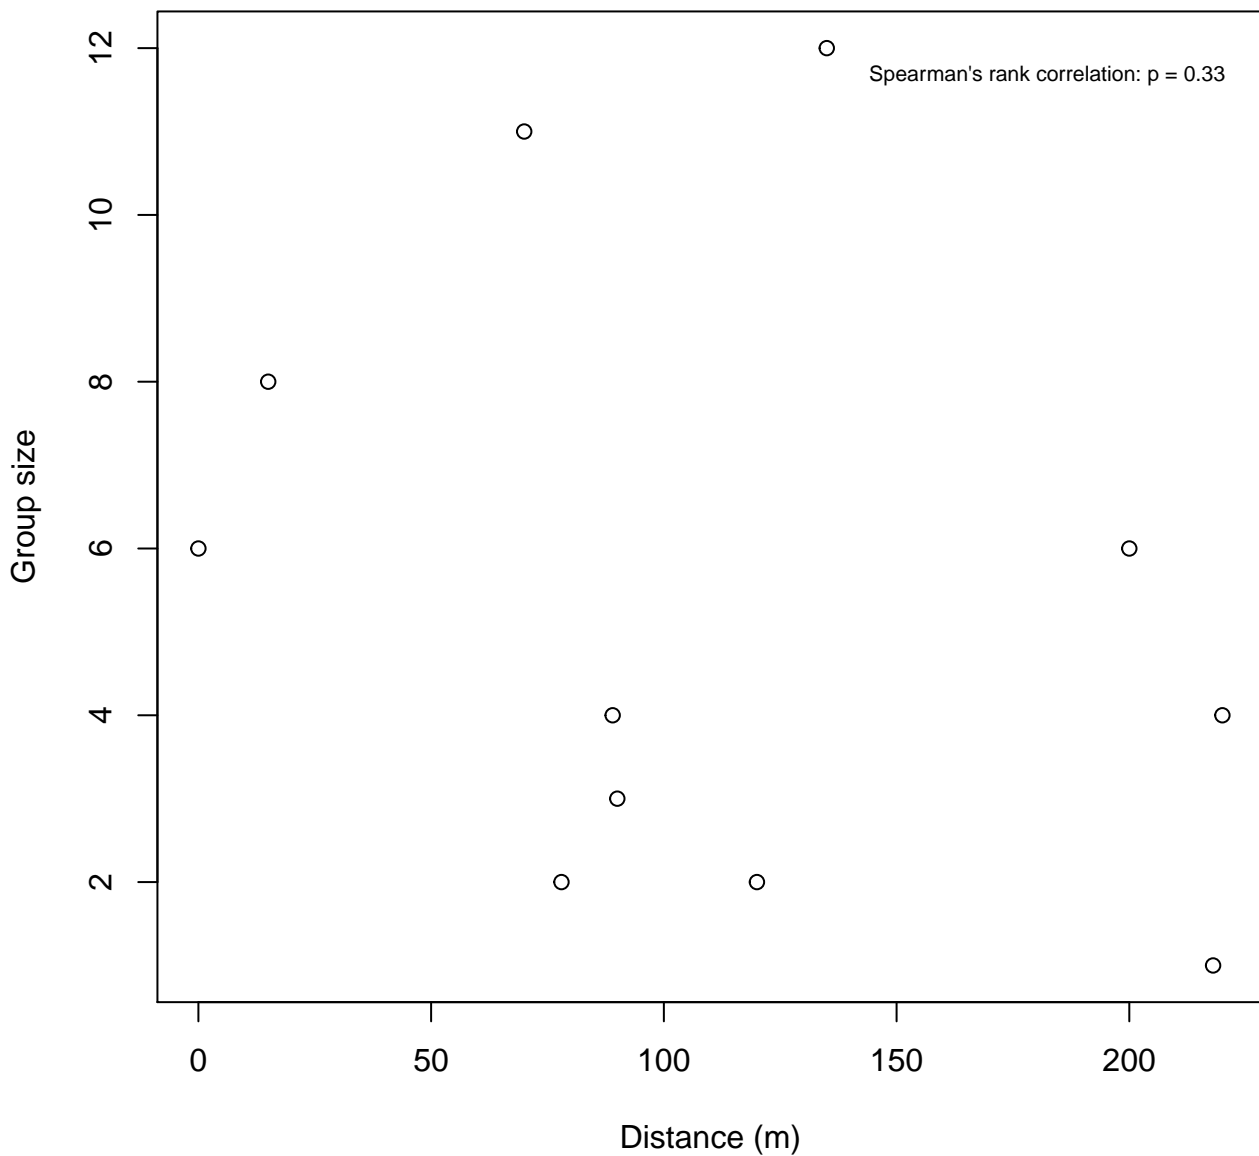

*Orthopsittaca manilatus* – Cerrado – Brazil (N = 11, key function = hn)

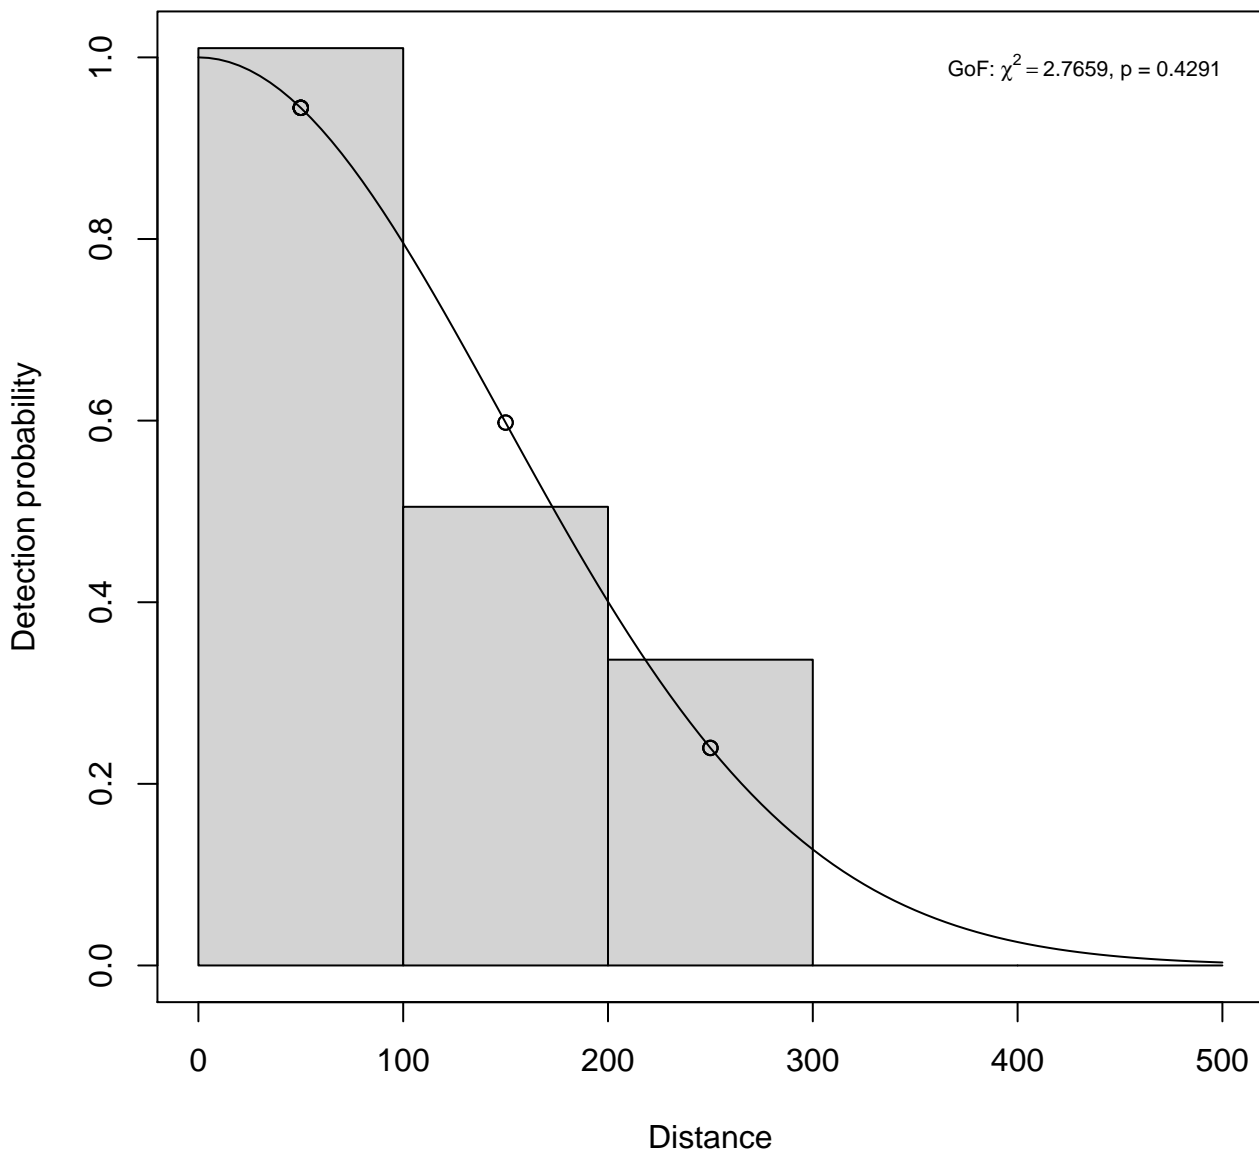

*Orthopsittaca manilatus* – Cerrado – Brazil (N = 11, key function = hn)

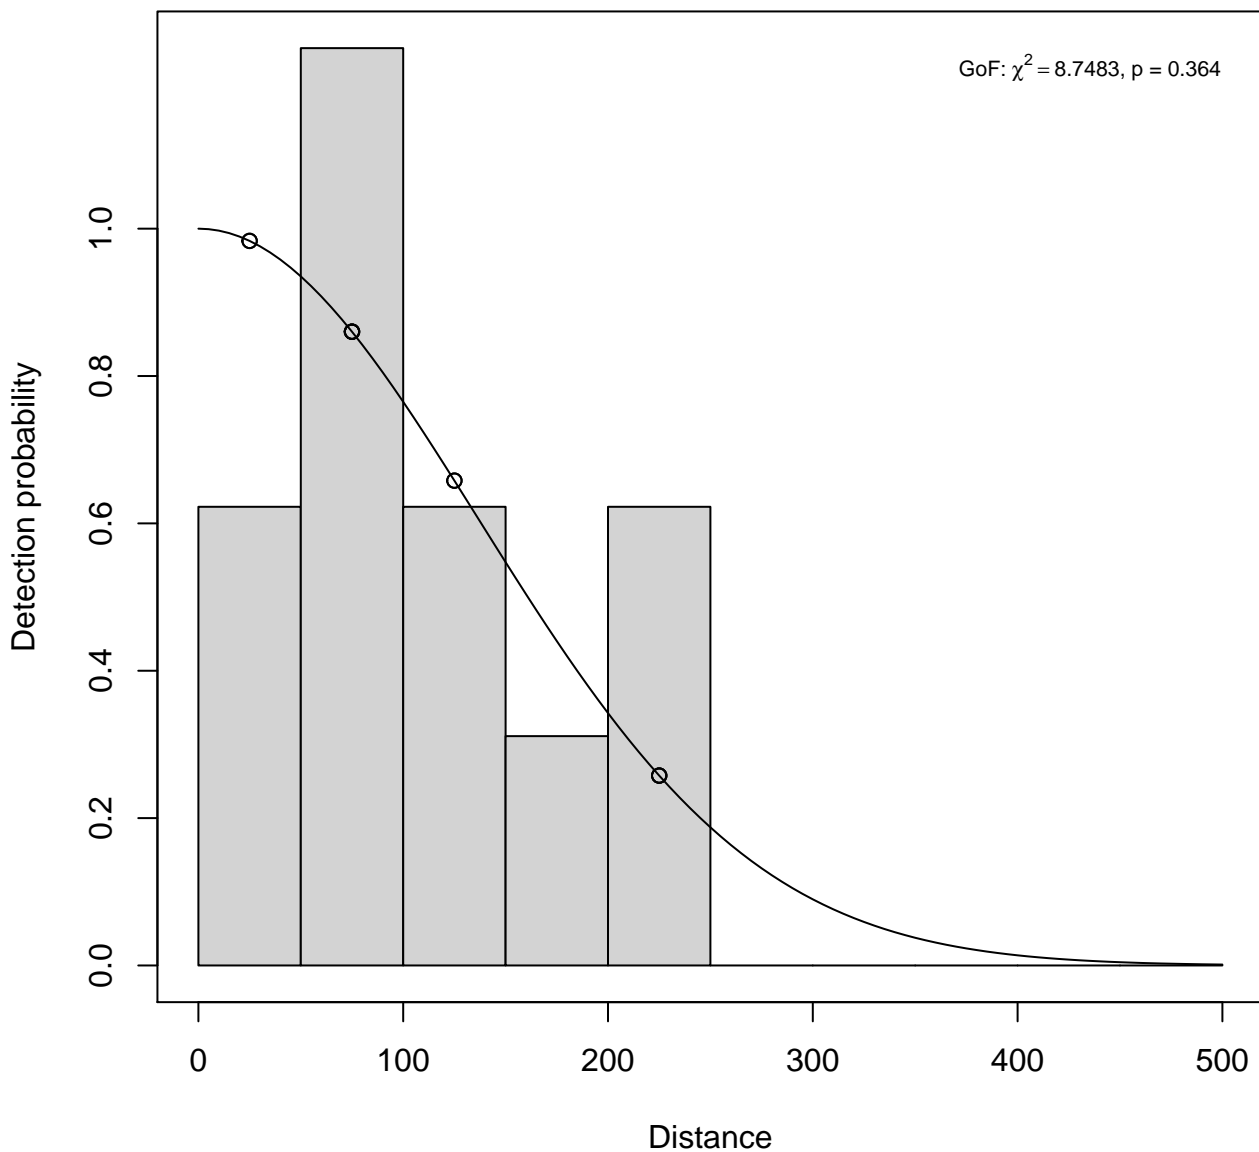

*Orthopsittaca manilatus* – Cerrado – Brazil (N = 11, key function = hn)

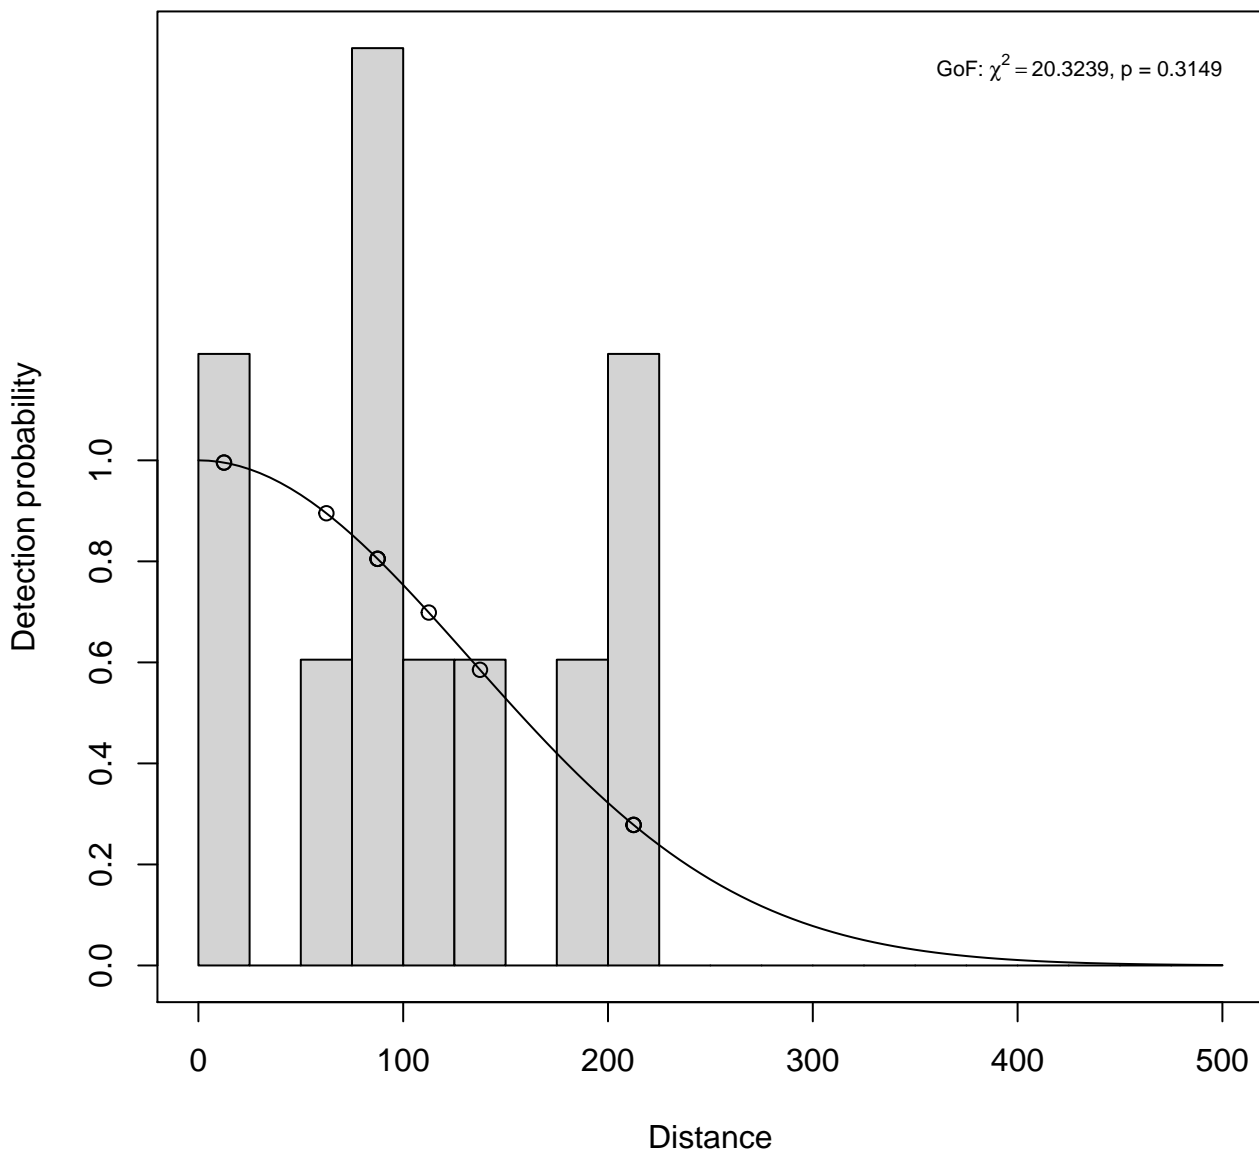

Supplement: s1 [file s1]
