# Supplementary material
Source: MDPI journal article supplement (https://www.mdpi.com/1424-2818/13/7/300)

# Aratinga jandaya – Cerrado – Brazil

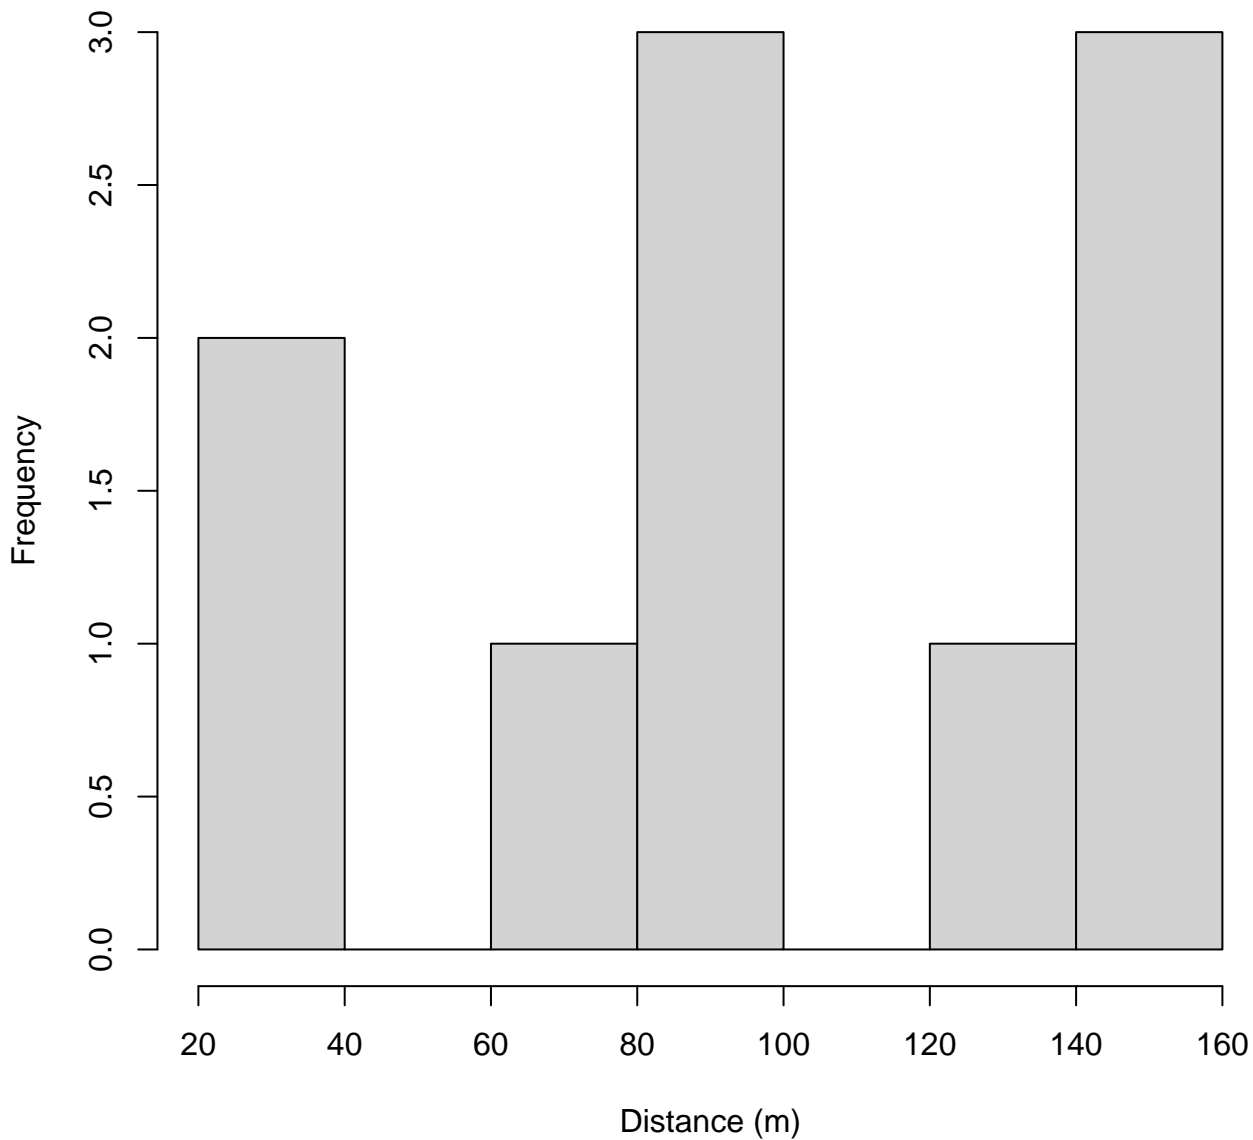

# Aratinga jandaya – Cerrado – Brazil

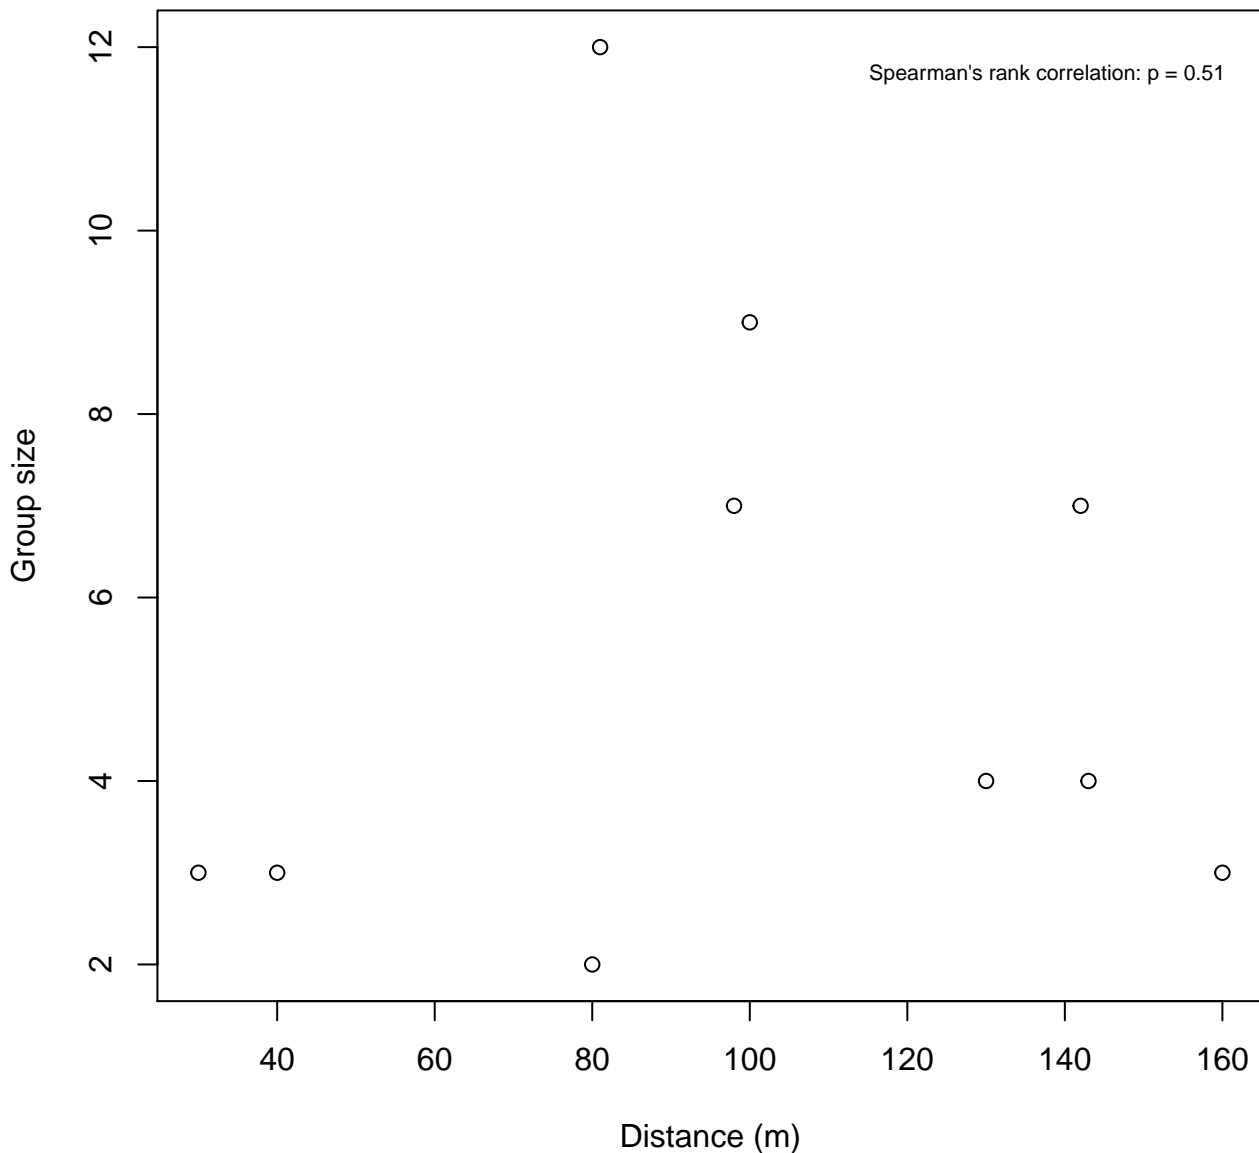

Aratinga jandaya – Cerrado – Brazil (N = 10, key function = hr)

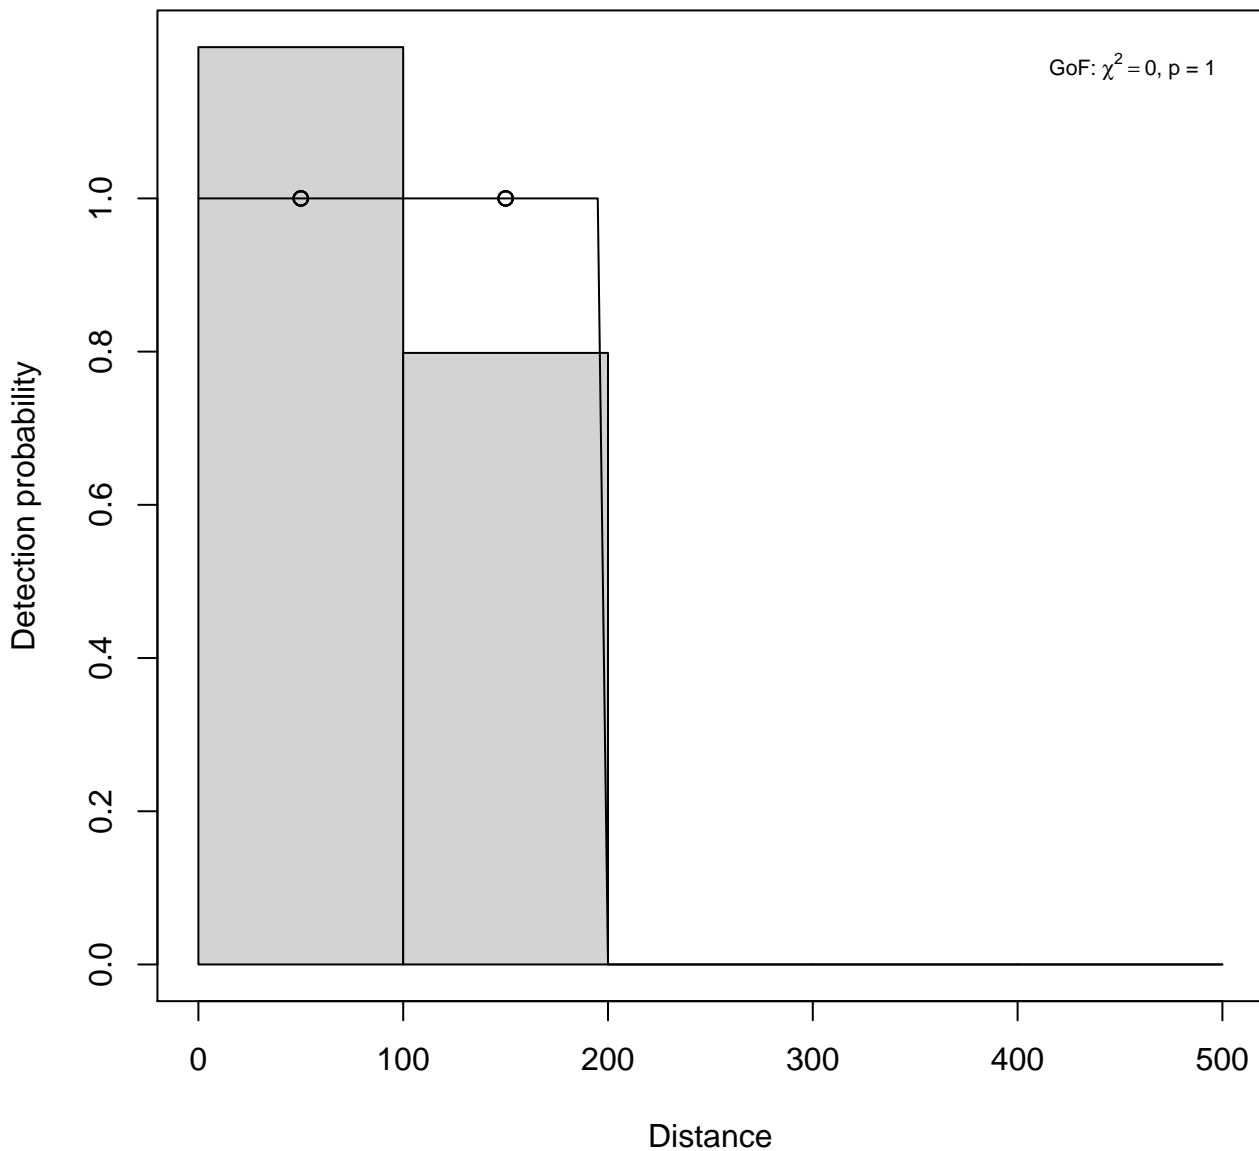

Aratinga jandaya – Cerrado – Brazil (N = 10, key function = hr)

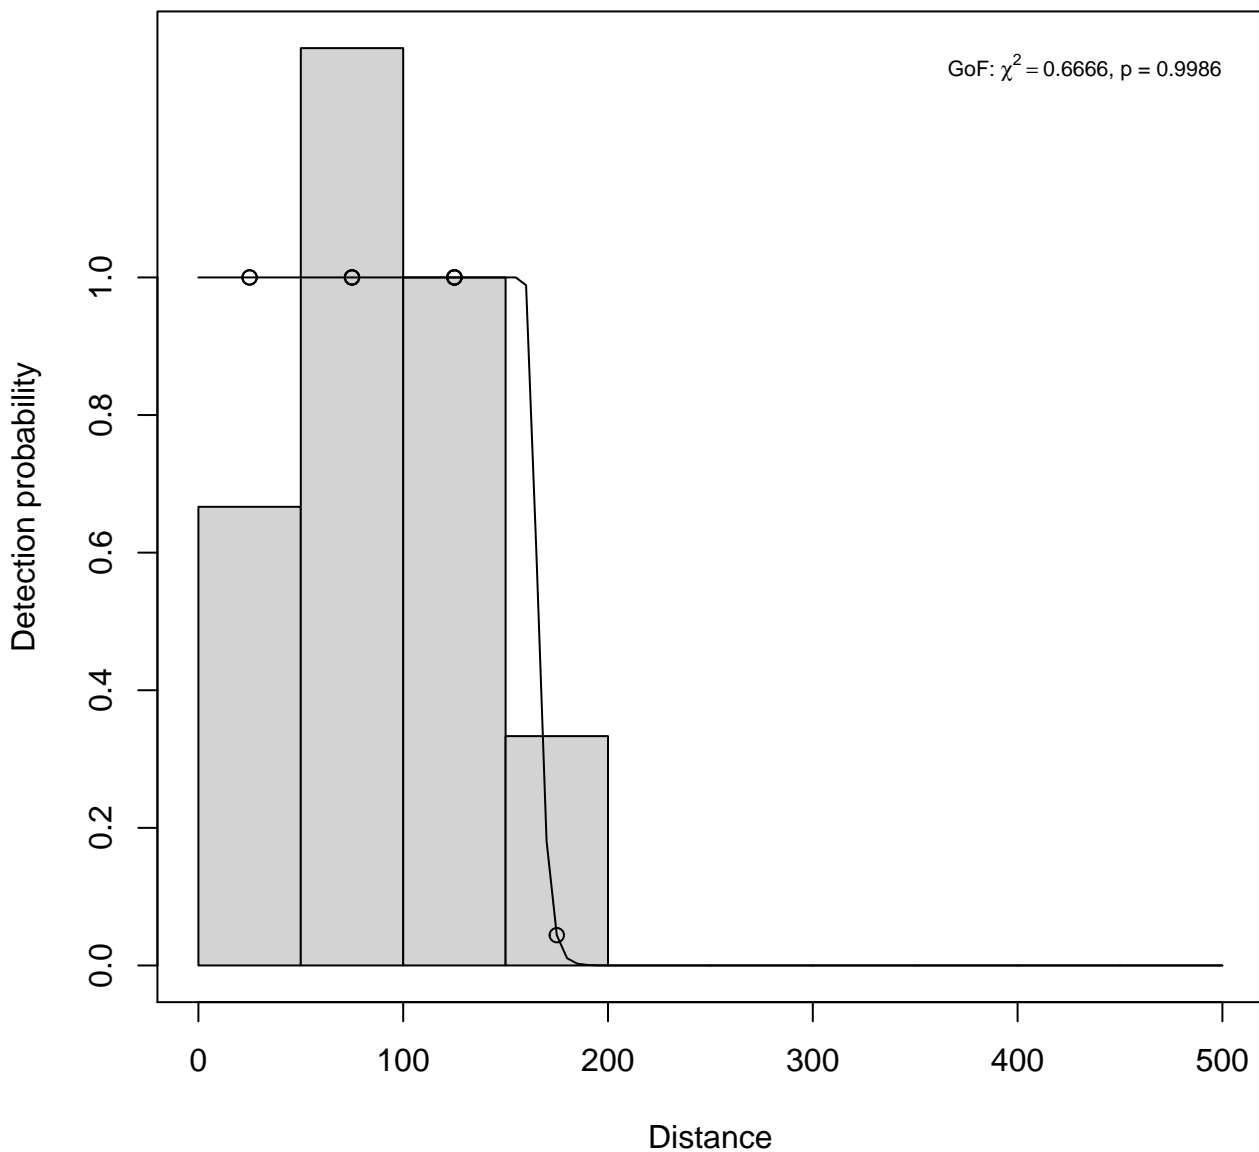

Aratinga jandaya – Cerrado – Brazil (N = 10, key function = hr)

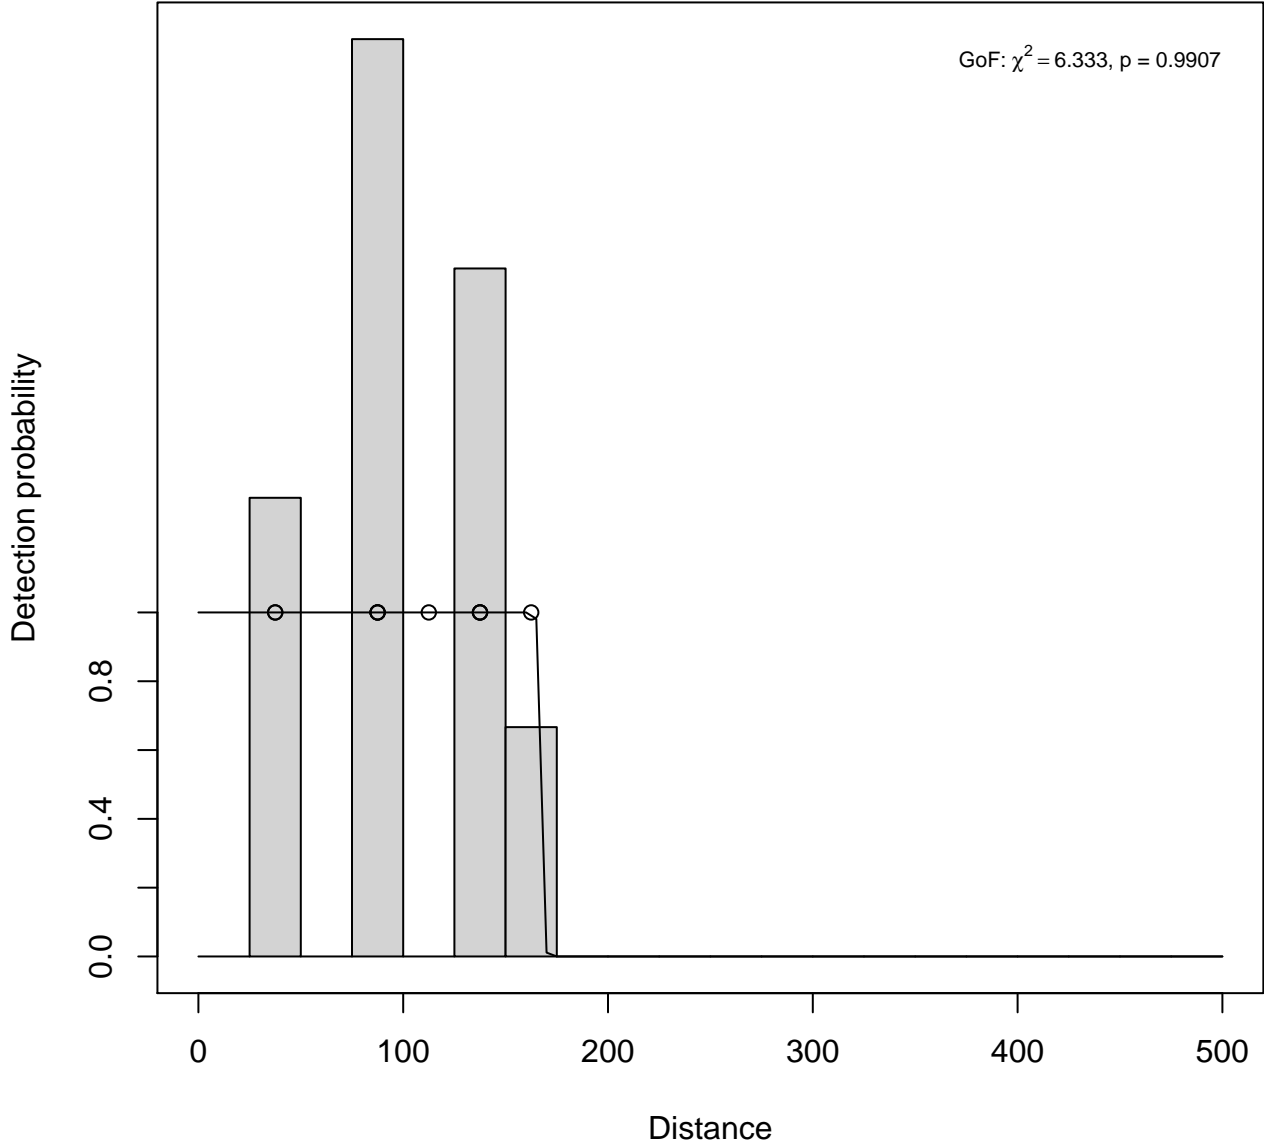

Supplement: s1 [file s1]
