# Supplementary material
Source: MDPI journal article supplement (https://www.mdpi.com/1424-2818/13/7/300)

# **Psittacara mitratus – Bolivian montane dry forests – Bolivia**

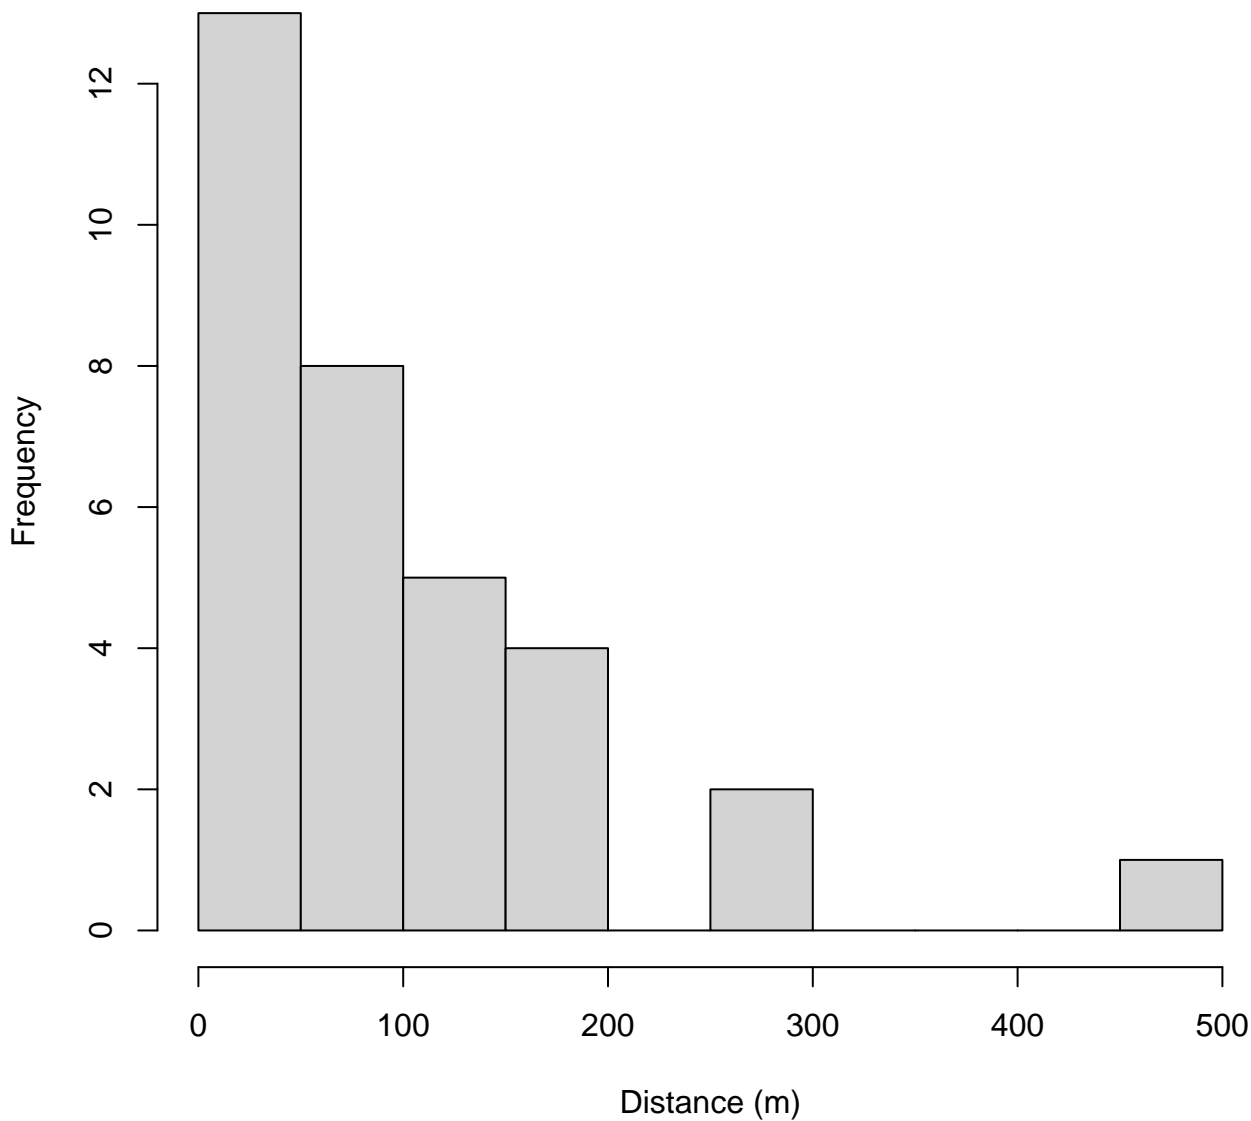

# Psittacara mitratus – Bolivian montane dry forests – Bolivia

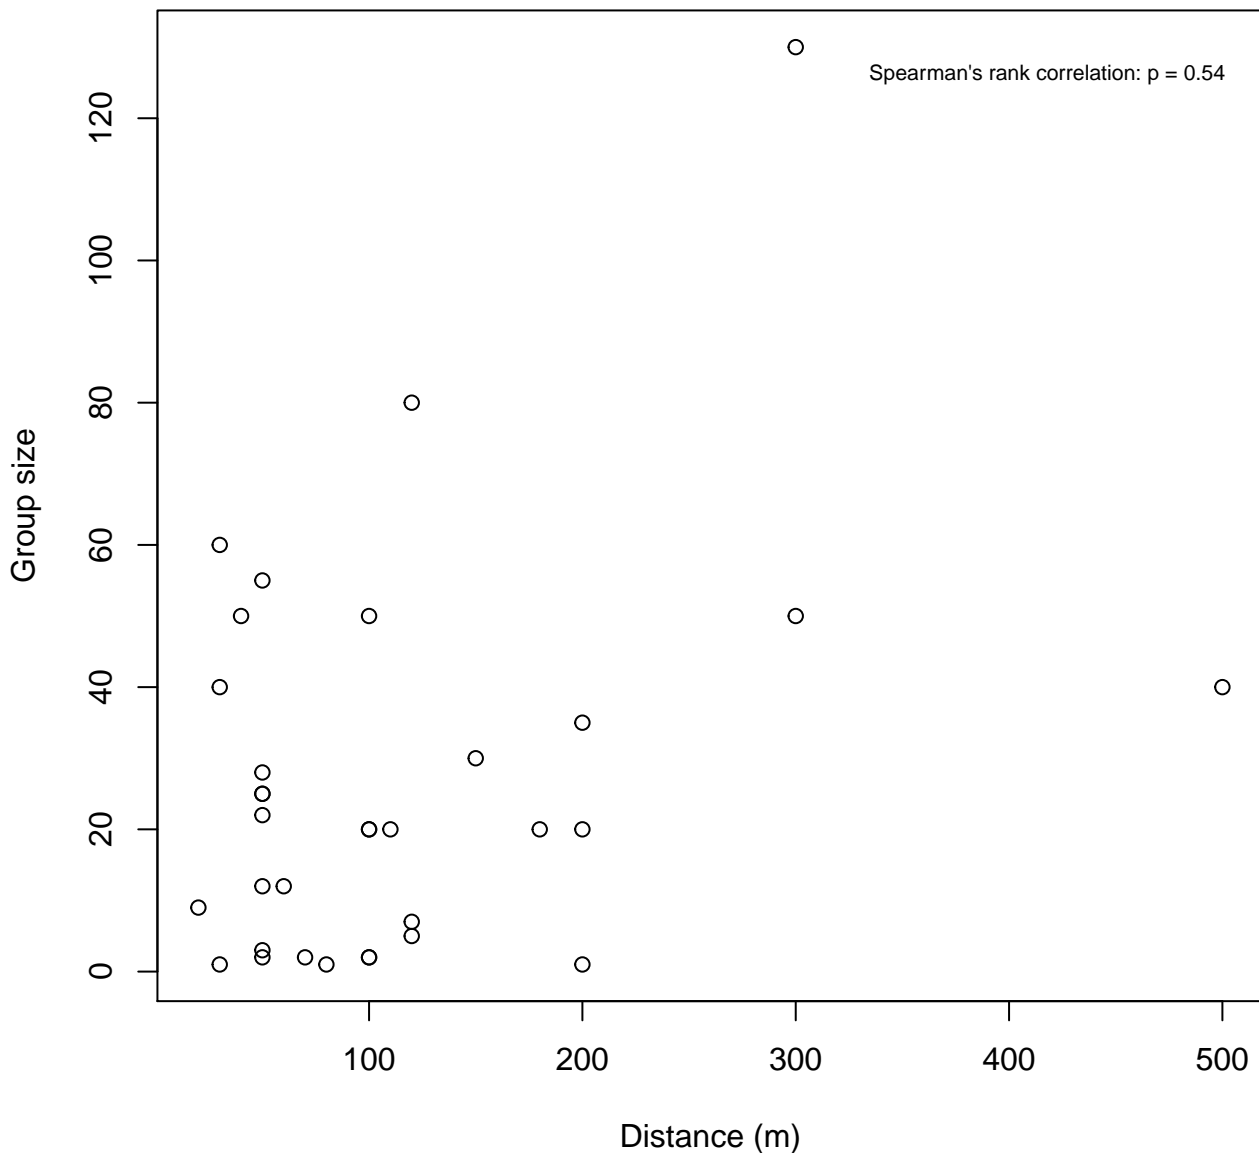

*Psittacara mitratus* – Bolivian montane dry forests – Bolivia (N = 33, key function = hn)

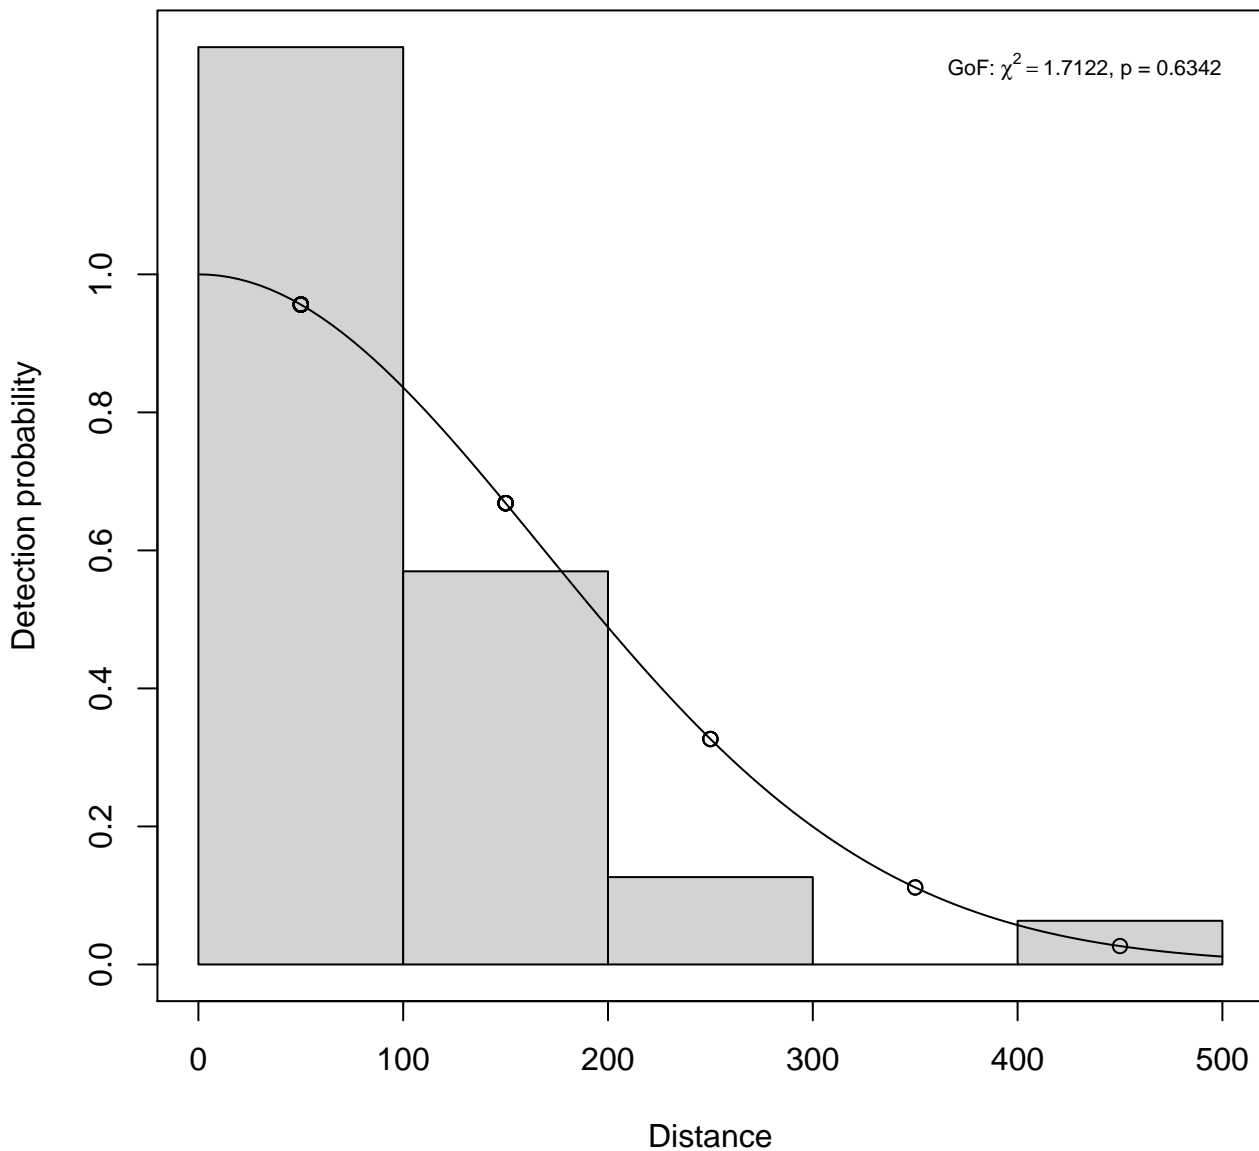

*Psittacara mitratus* – Bolivian montane dry forests – Bolivia (N = 33, key function = hr)

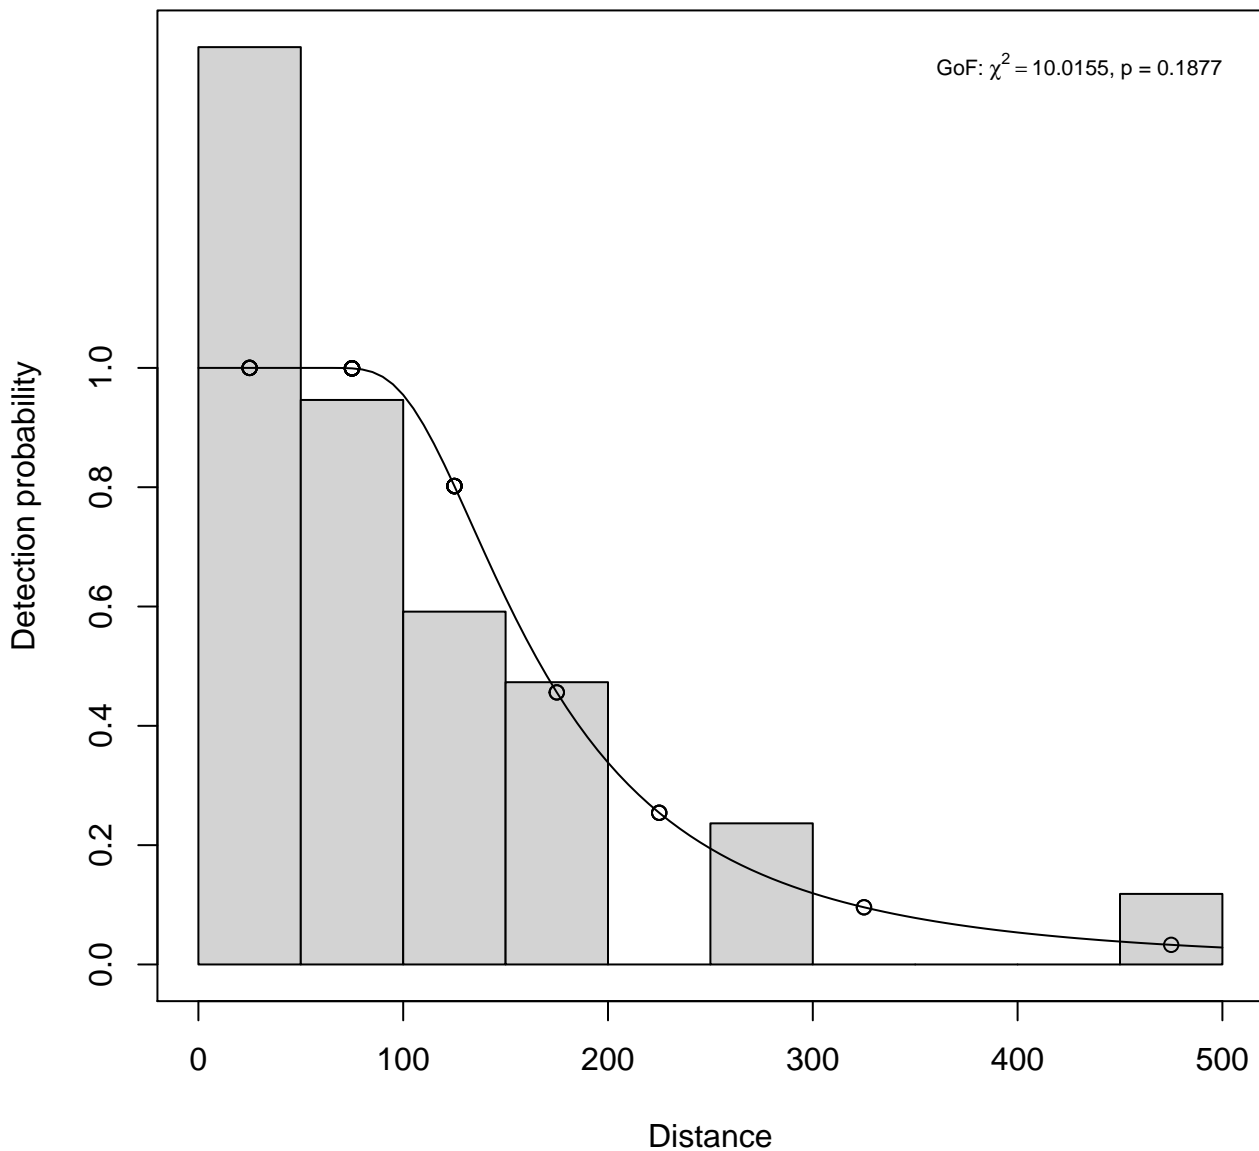

Psittacara mitratus – Bolivian montane dry forests – Bolivia (N = 33, key function = hr)

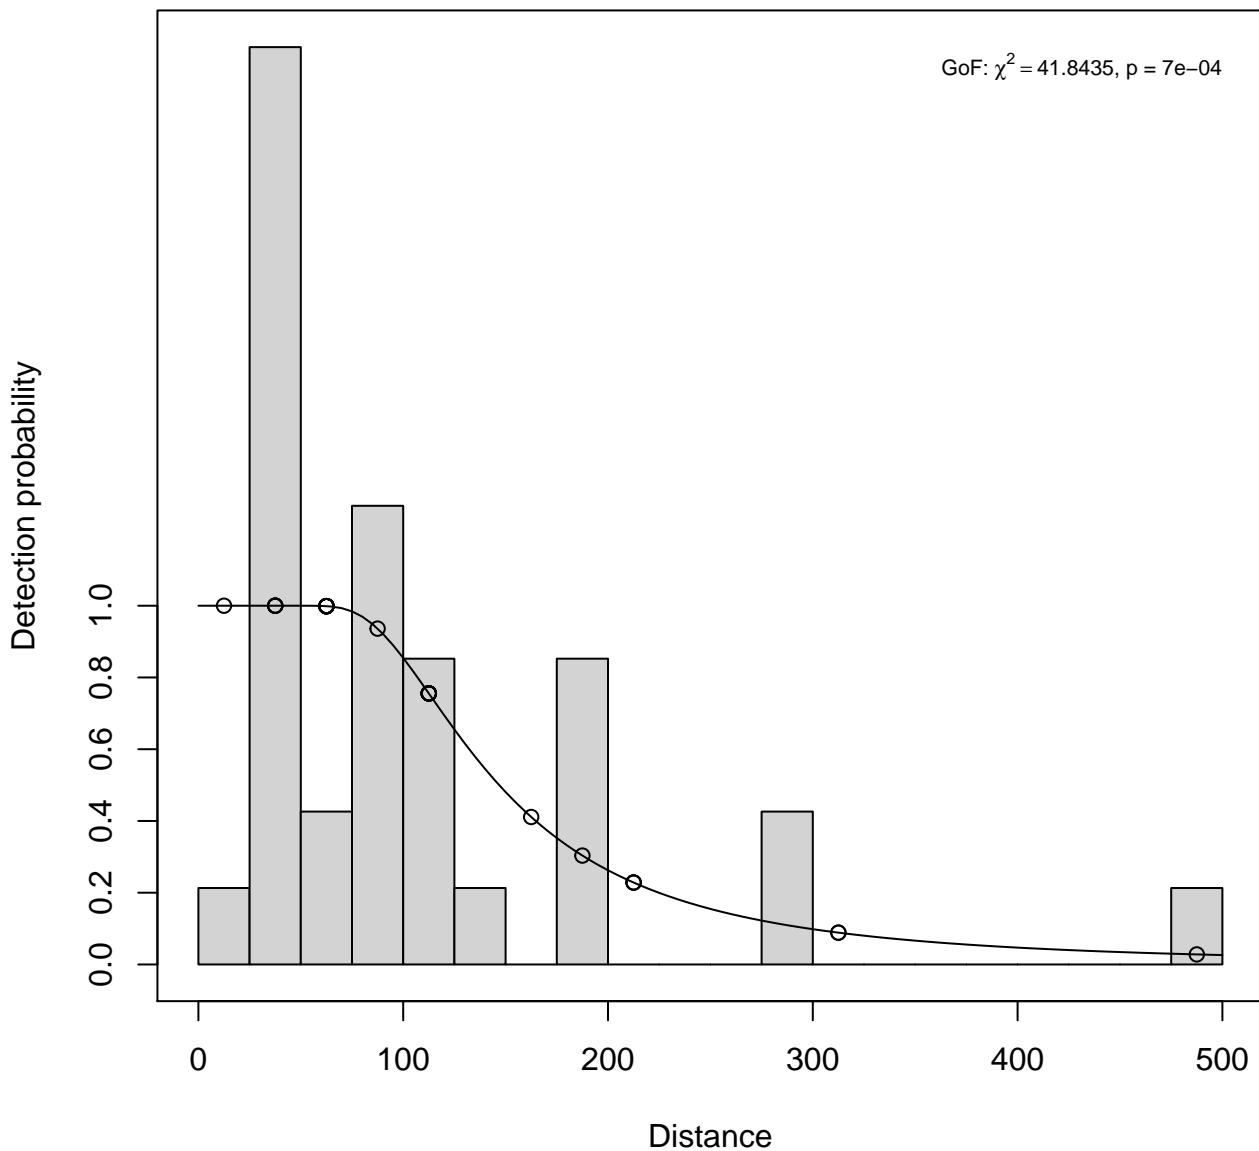

Supplement: s1 [file s1]
