# Supplementary material
Source: MDPI journal article supplement (https://www.mdpi.com/1424-2818/13/7/300)

# ***Myiopsitta monachus* – Humid Chaco – Argentina**

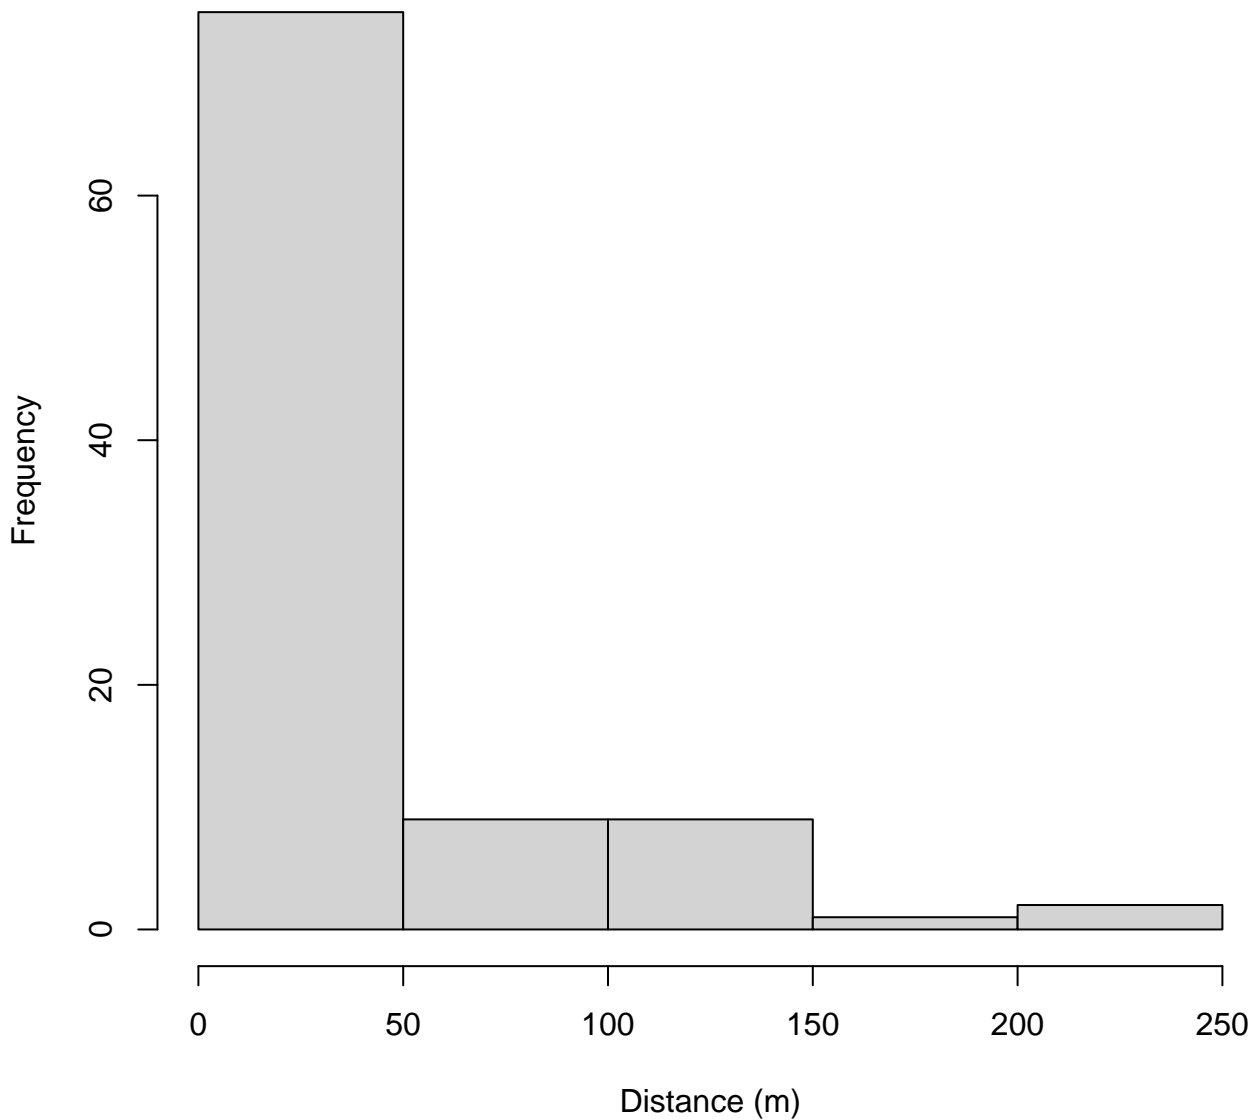

# **Myiopsitta monachus – Humid Chaco – Argentina**

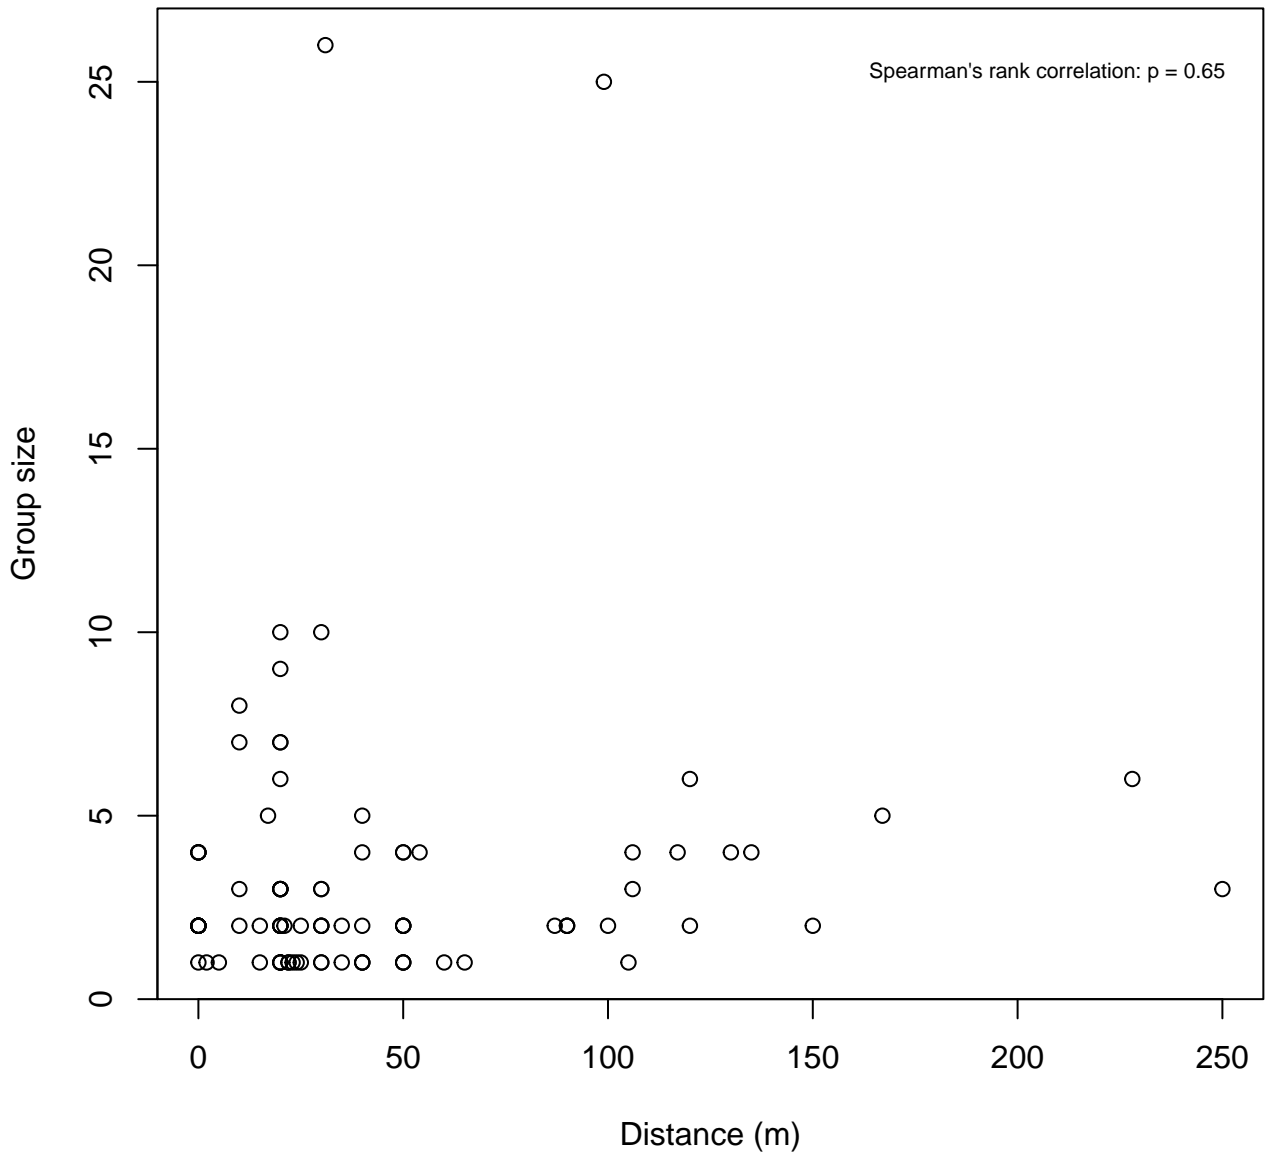

Myiopsitta monachus – Humid Chaco – Argentina (N = 96, key function = hr)

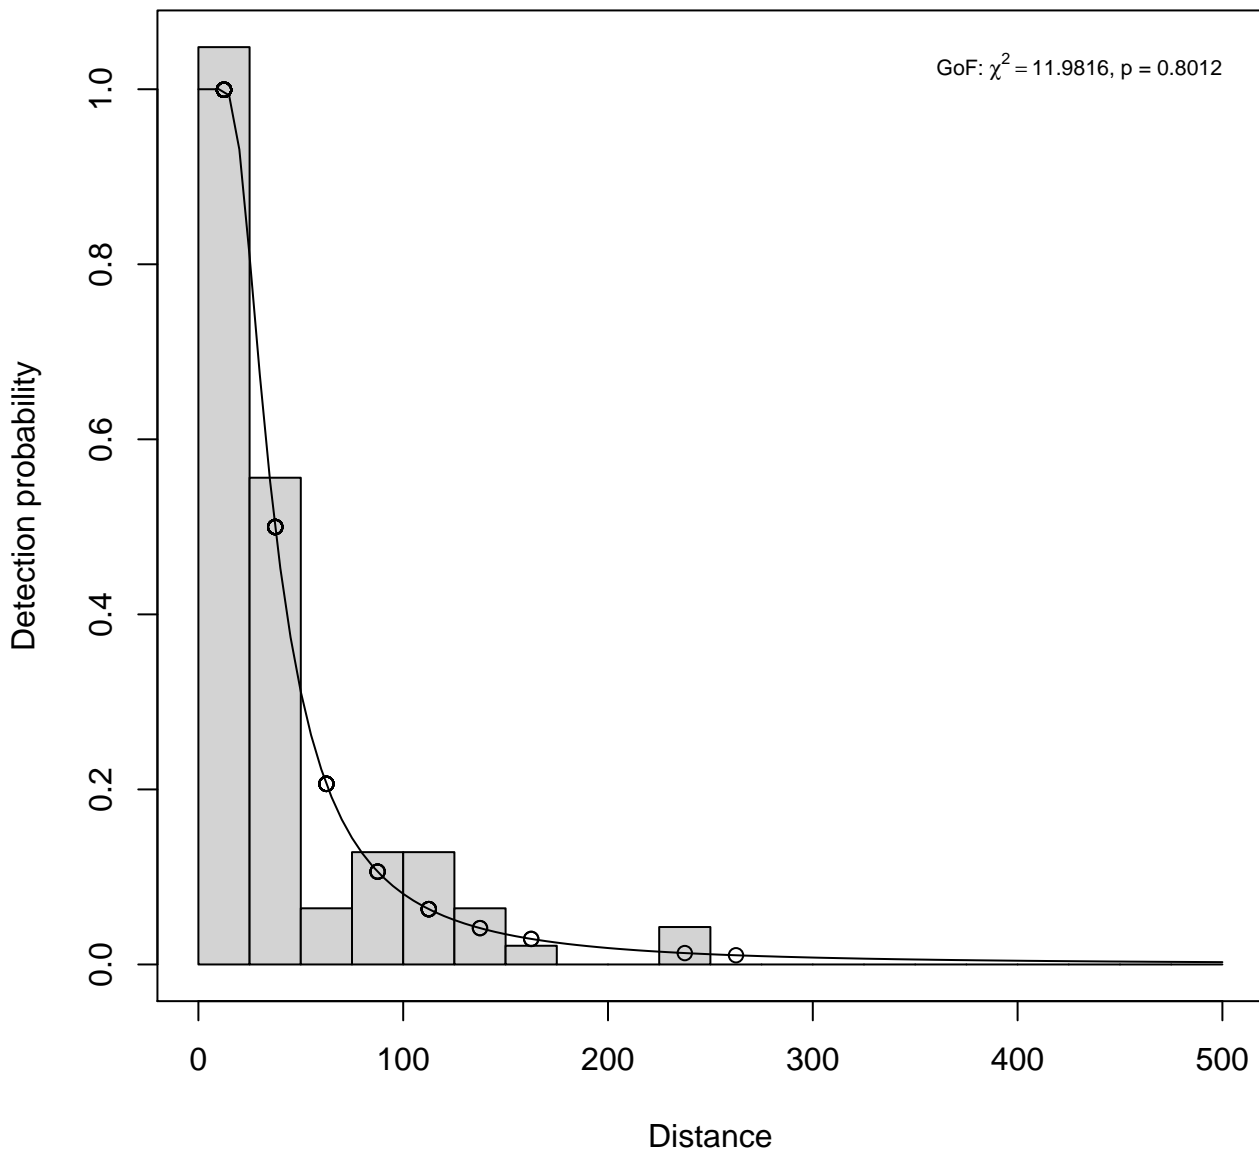

Myiopsitta monachus – Humid Chaco – Argentina (N = 96, key function = hr)

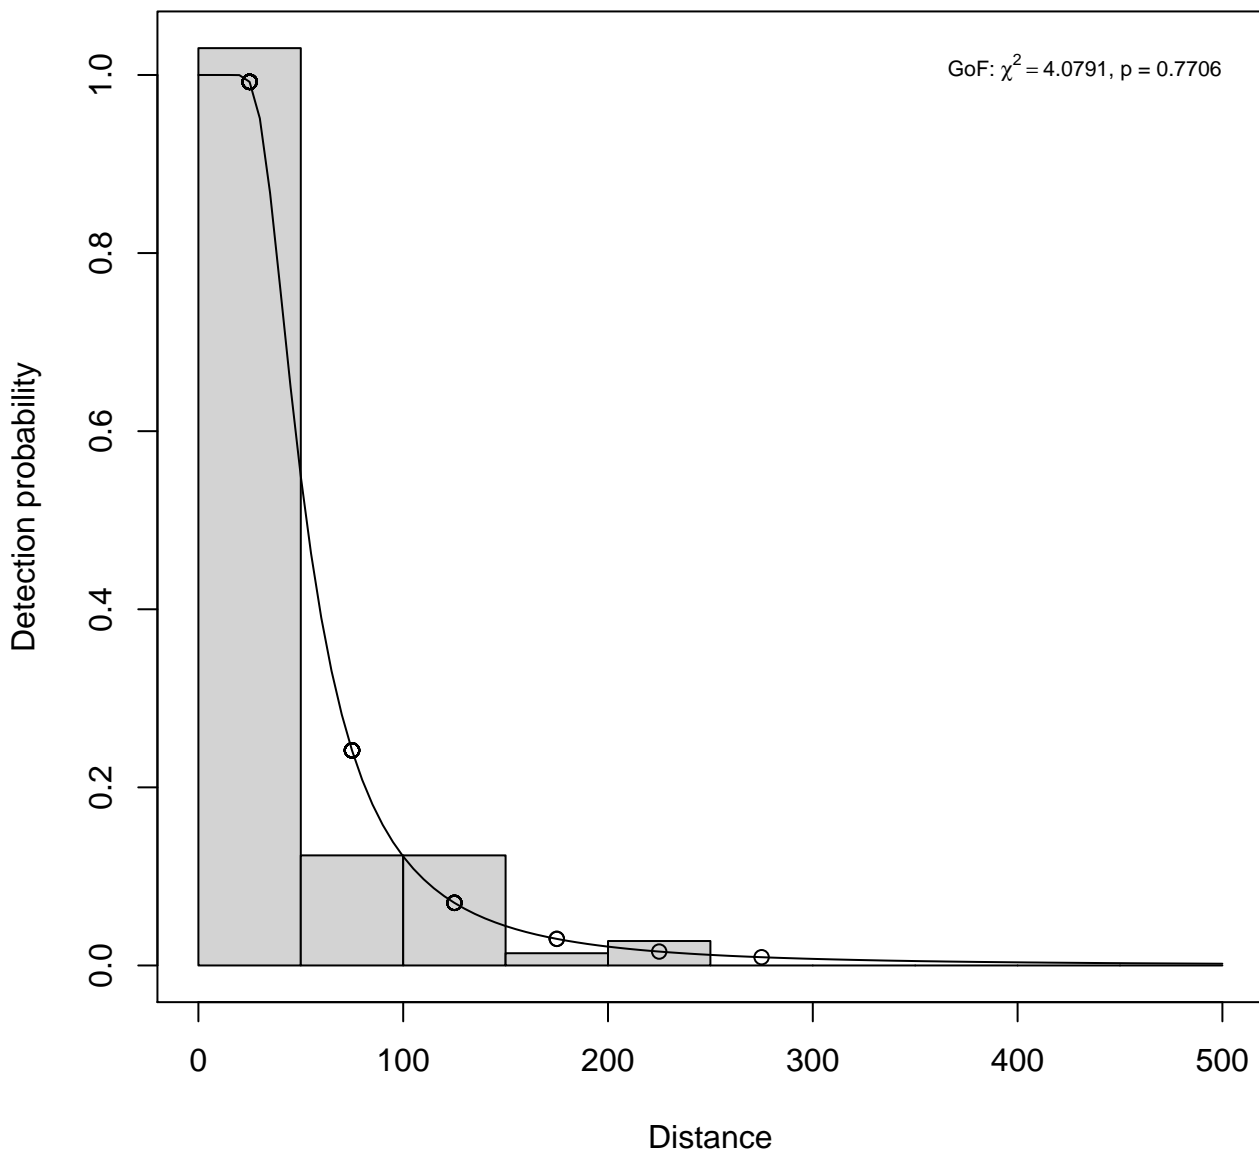

*Myiopsitta monachus* – Humid Chaco – Argentina (N = 96, key function = hr)

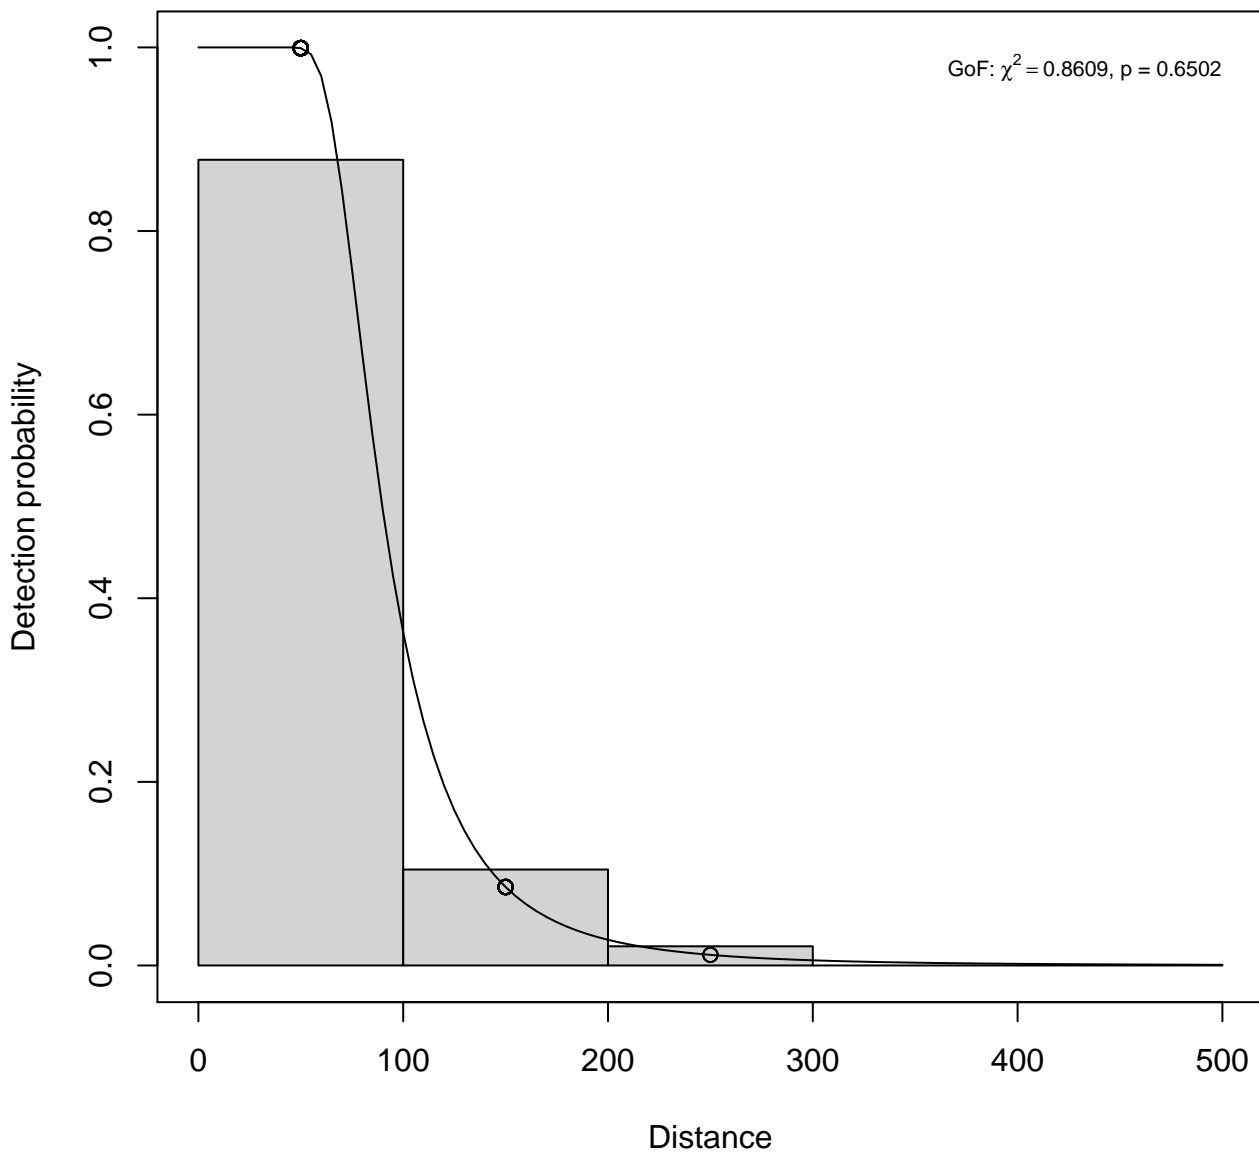

Supplement: s1 [file s1]
