# Supplementary material
Source: MDPI journal article supplement (https://www.mdpi.com/1424-2818/13/7/300)

# Pionus menstruus – Madeira–Tapajos moist forests – Brazil

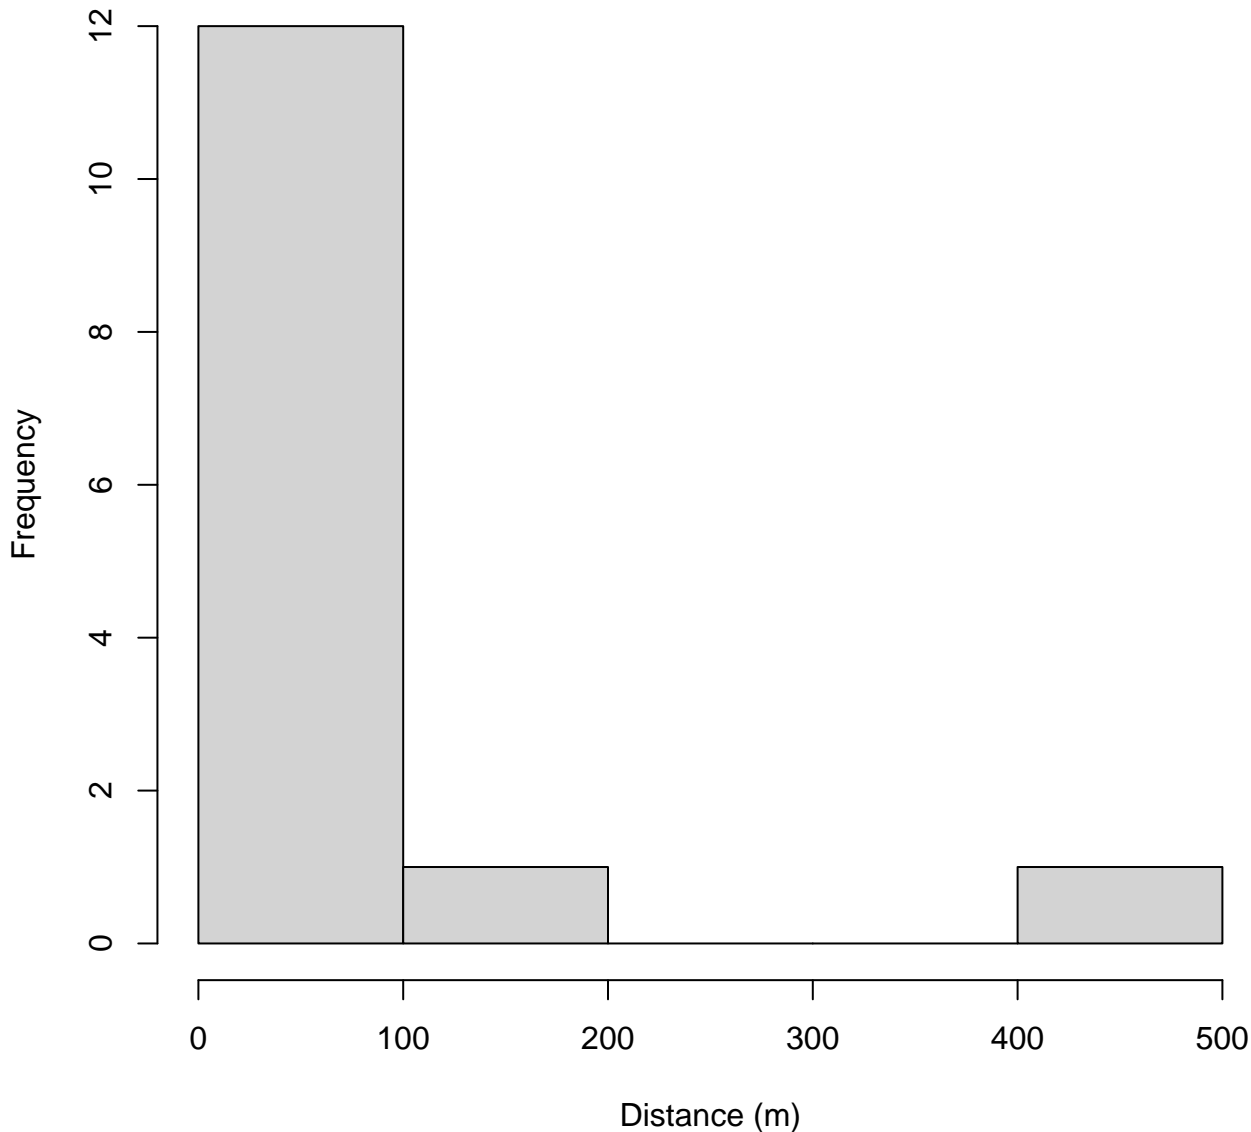

# Pionus menstruus – Madeira–Tapajos moist forests – Brazil

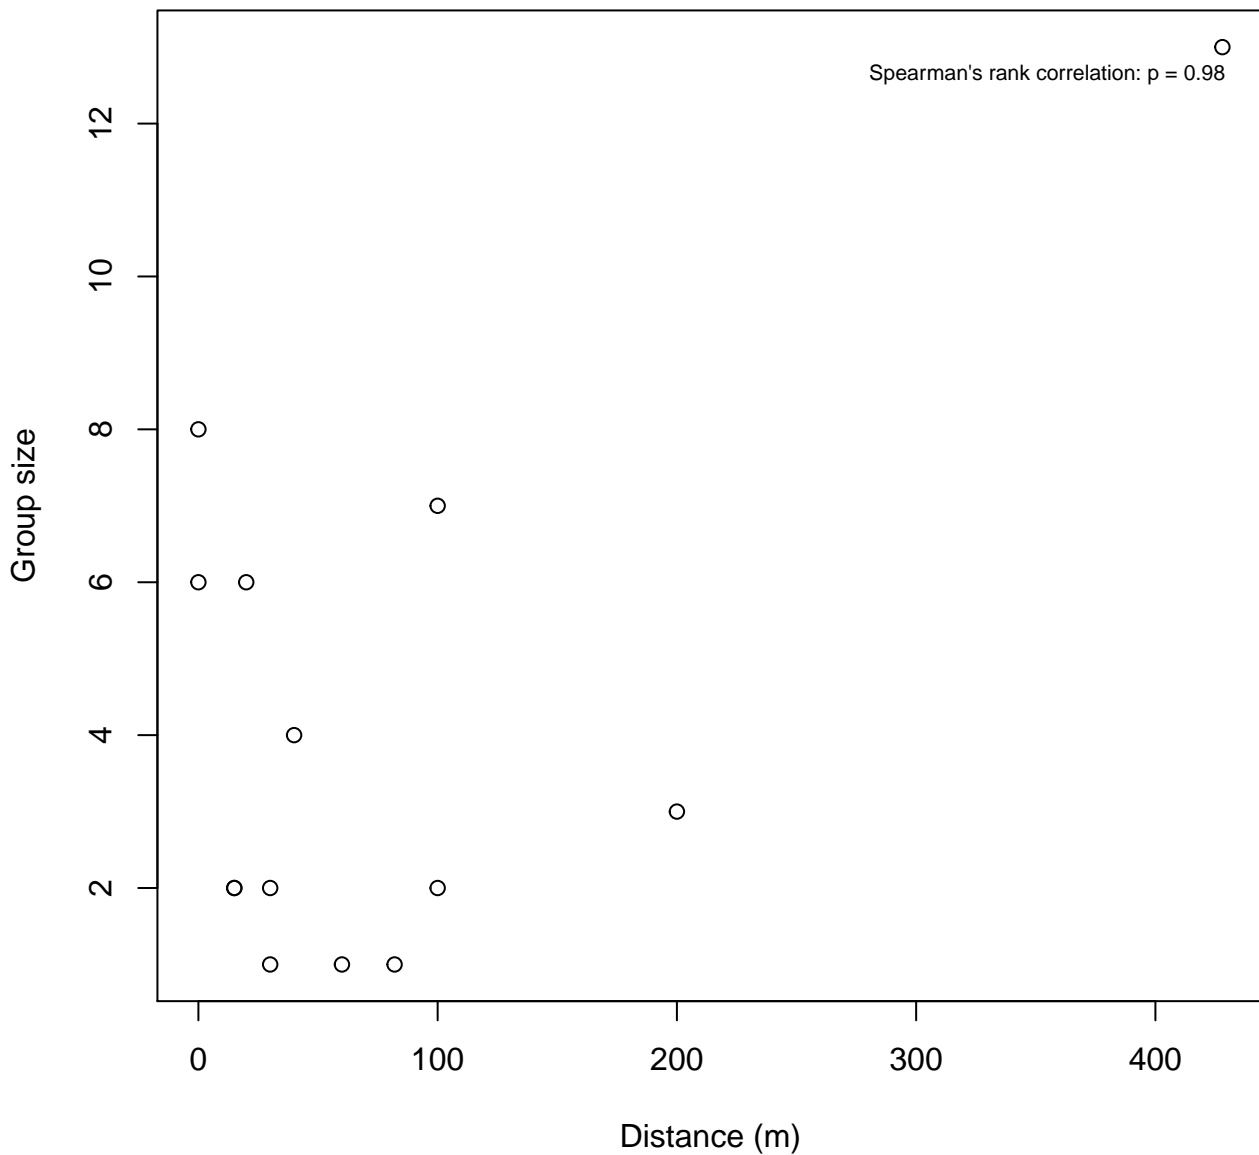

Pionus menstruus – Madeira–Tapajos moist forests – Brazil (N = 14, key function = hr)

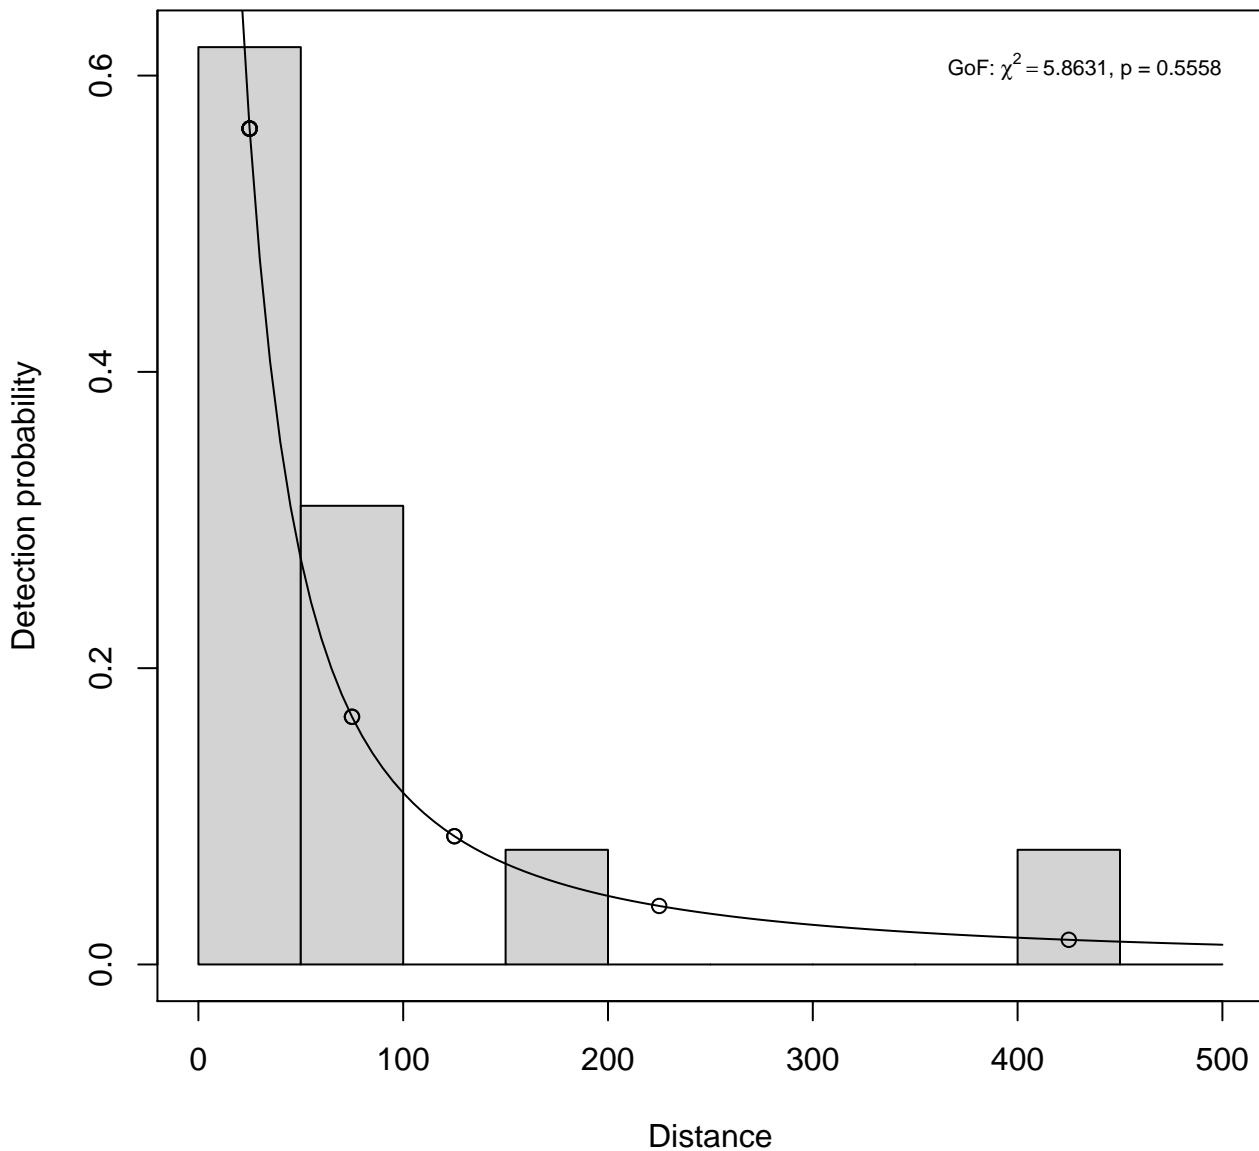

Pionus menstruus – Madeira–Tapajos moist forests – Brazil (N = 14, key function = hr)

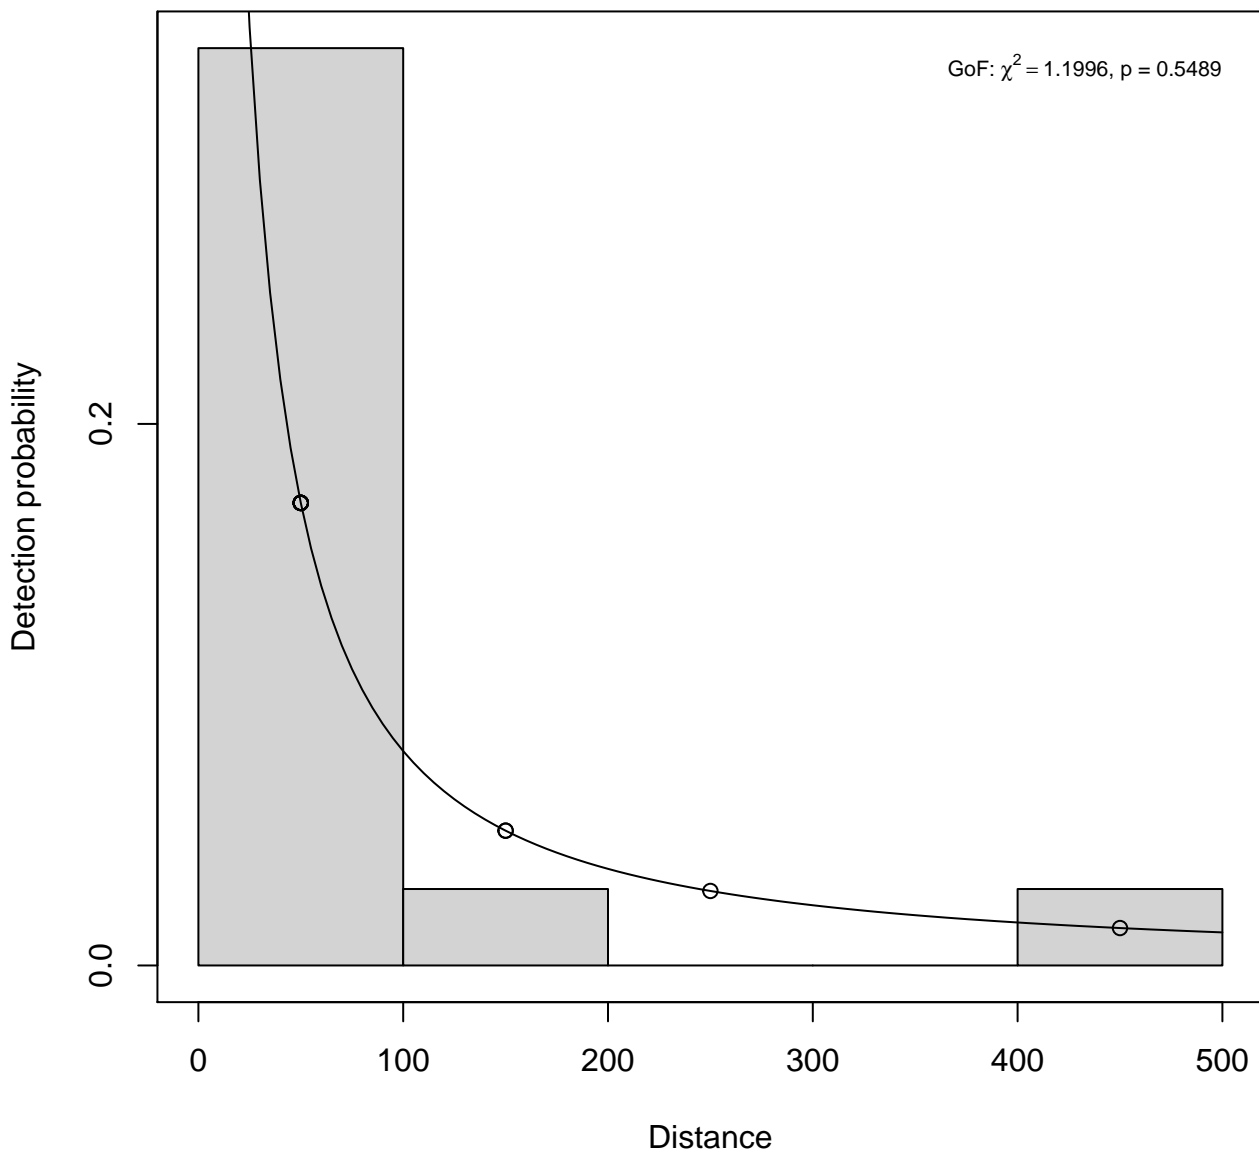

*Pionus menstruus* – Madeira–Tapajos moist forests – Brazil (N = 14, key function = hr)

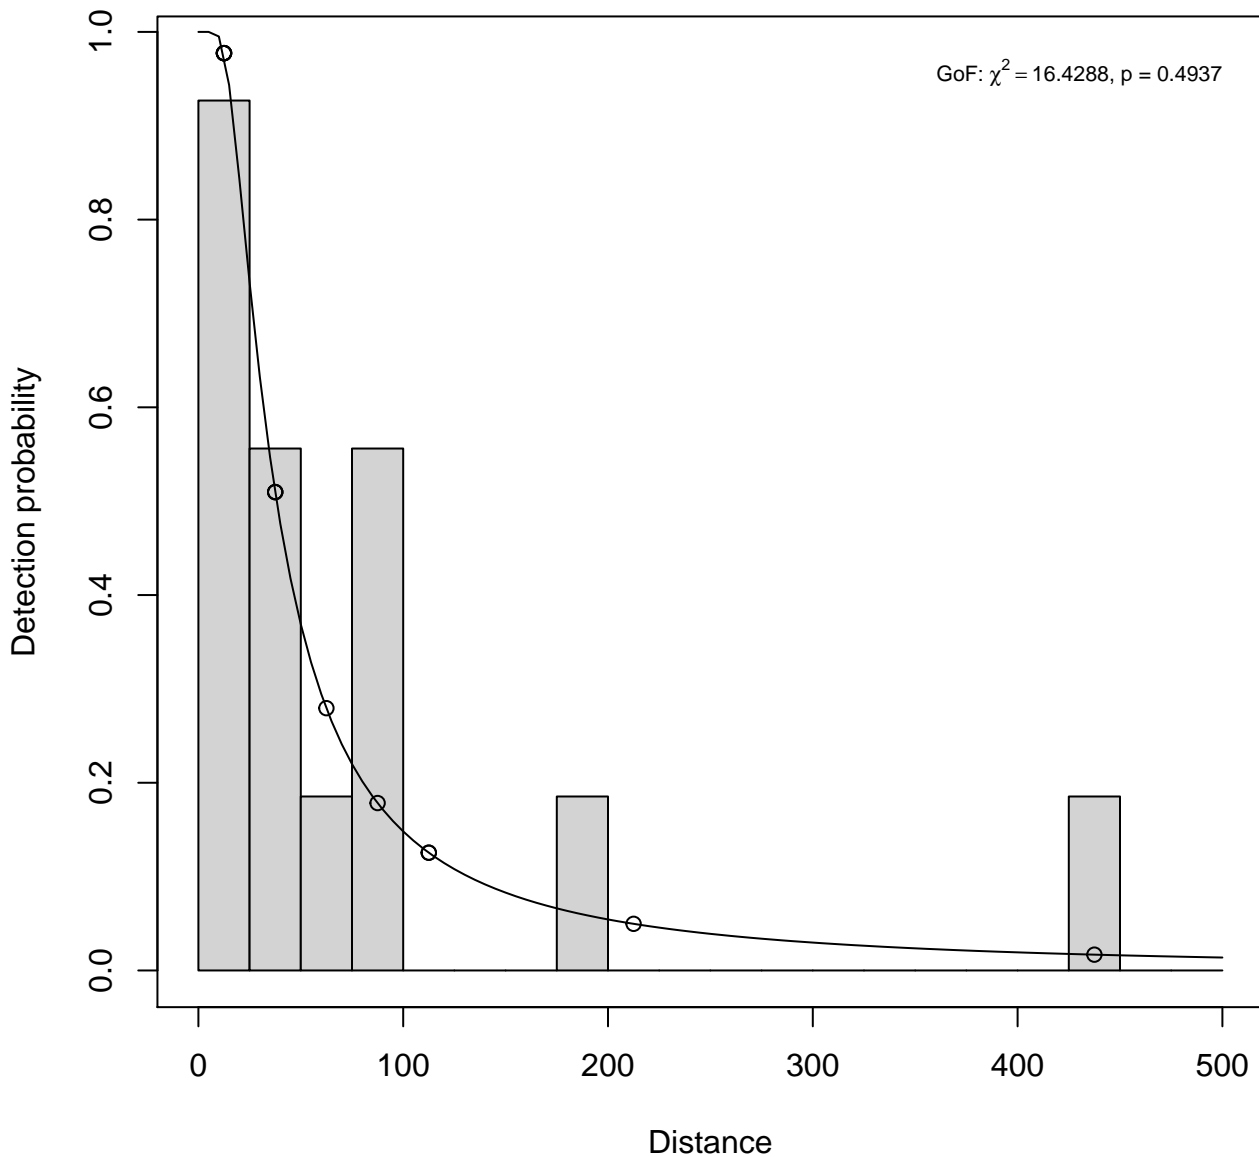

Supplement: s1 [file s1]
