# Supplementary material
Source: MDPI journal article supplement (https://www.mdpi.com/1424-2818/13/7/300)

# ***Diopsittaca cumanensis* – Cerrado – Brazil**

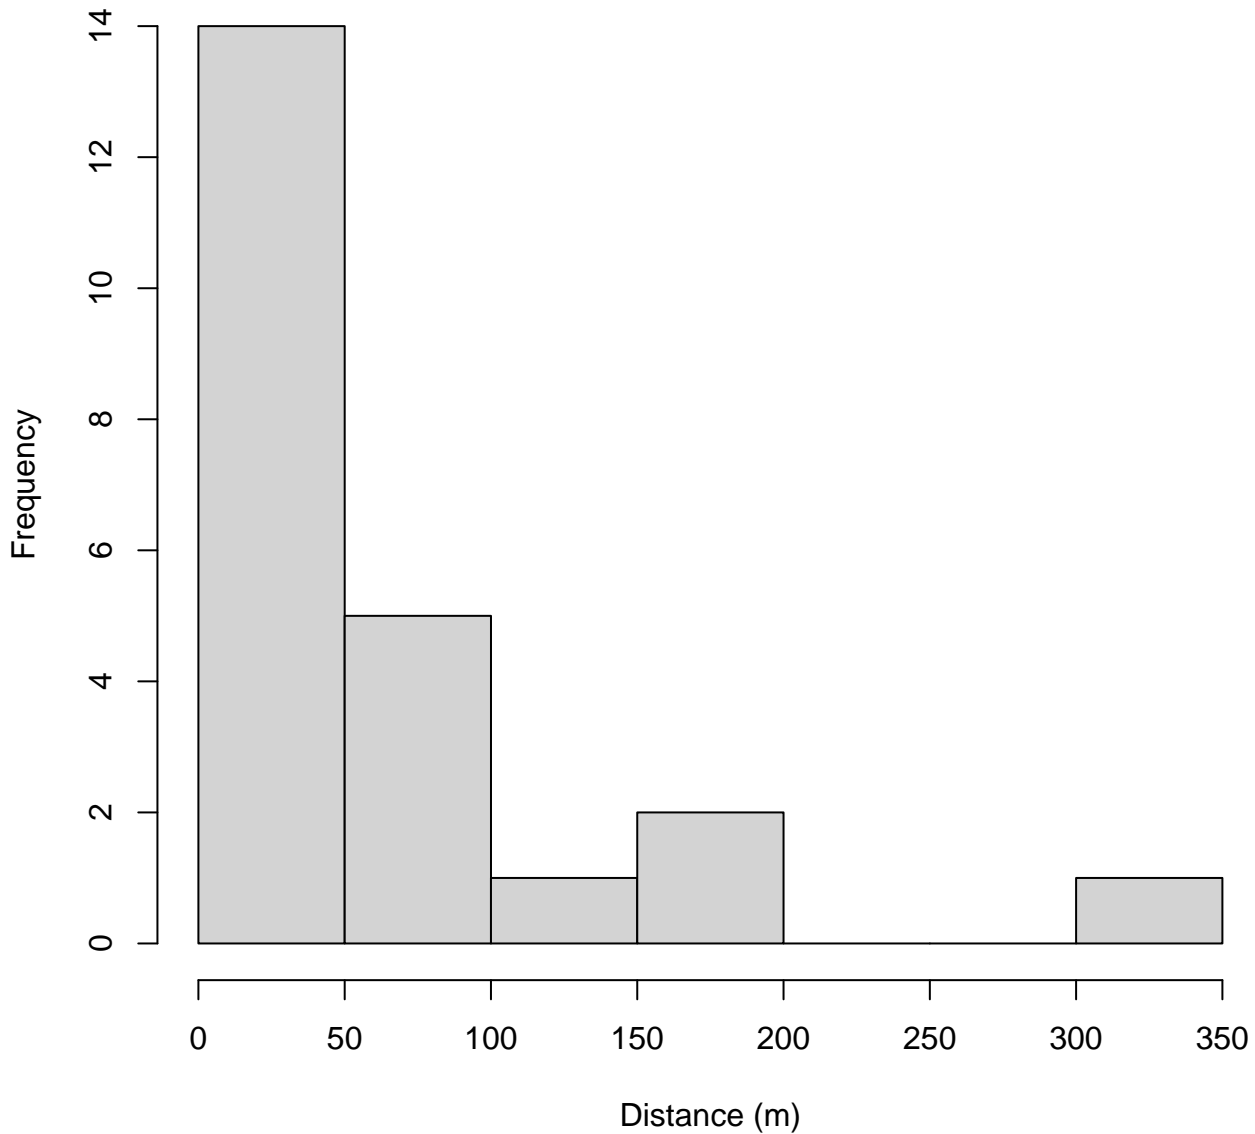

# Diopsittaca cumanensis – Cerrado – Brazil

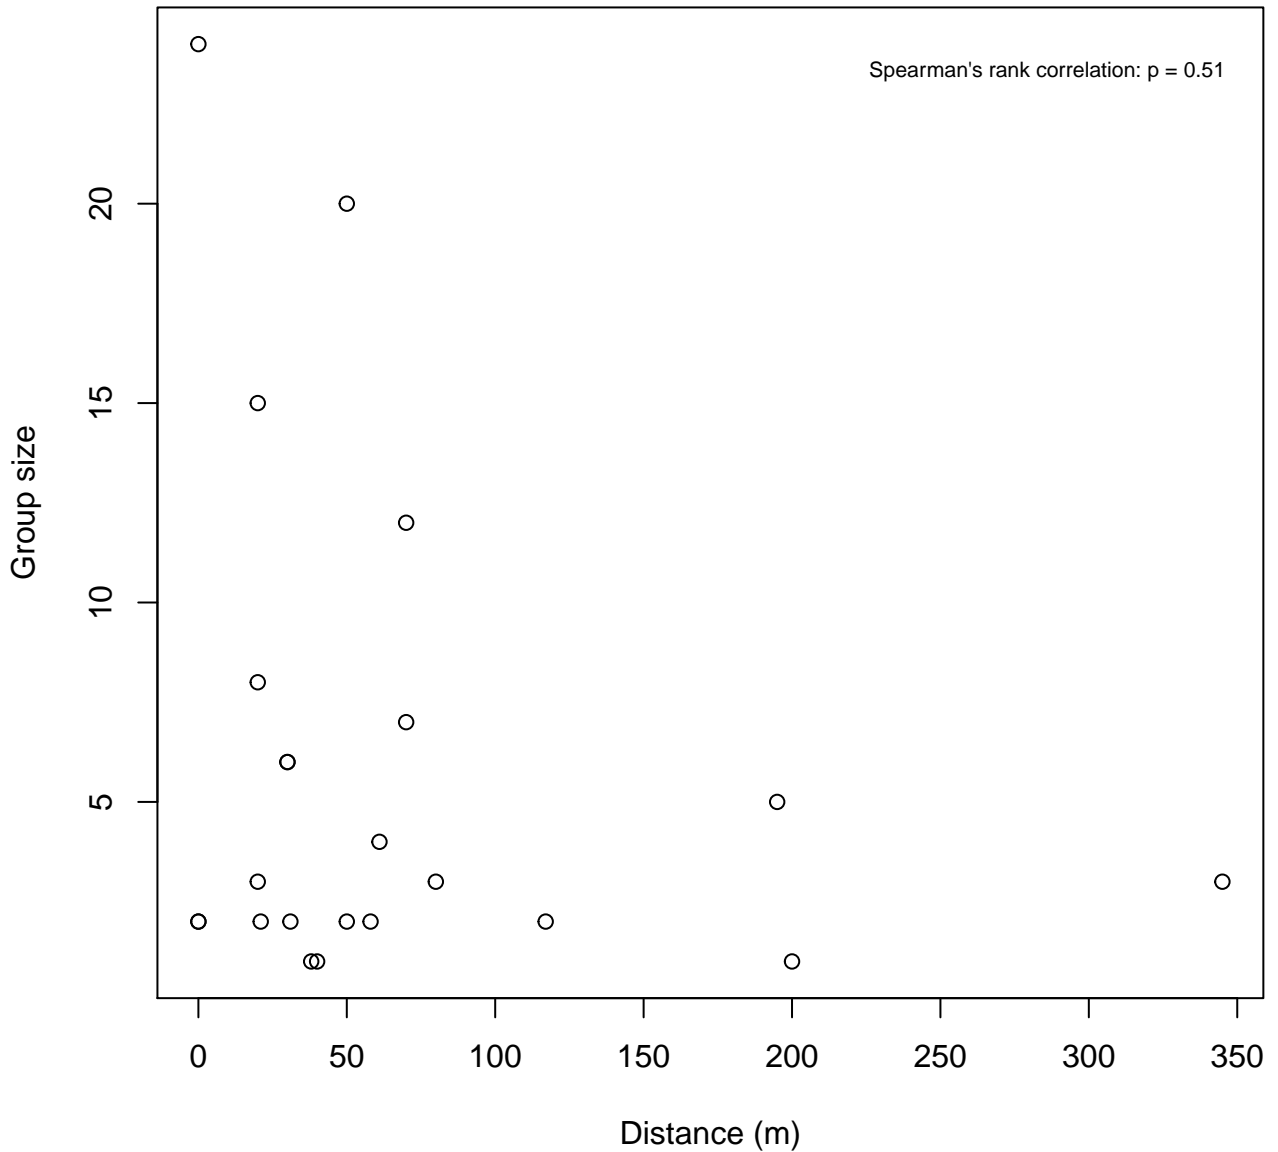

*Diopsittaca cumanensis* – Cerrado – Brazil (N = 23, key function = hr)

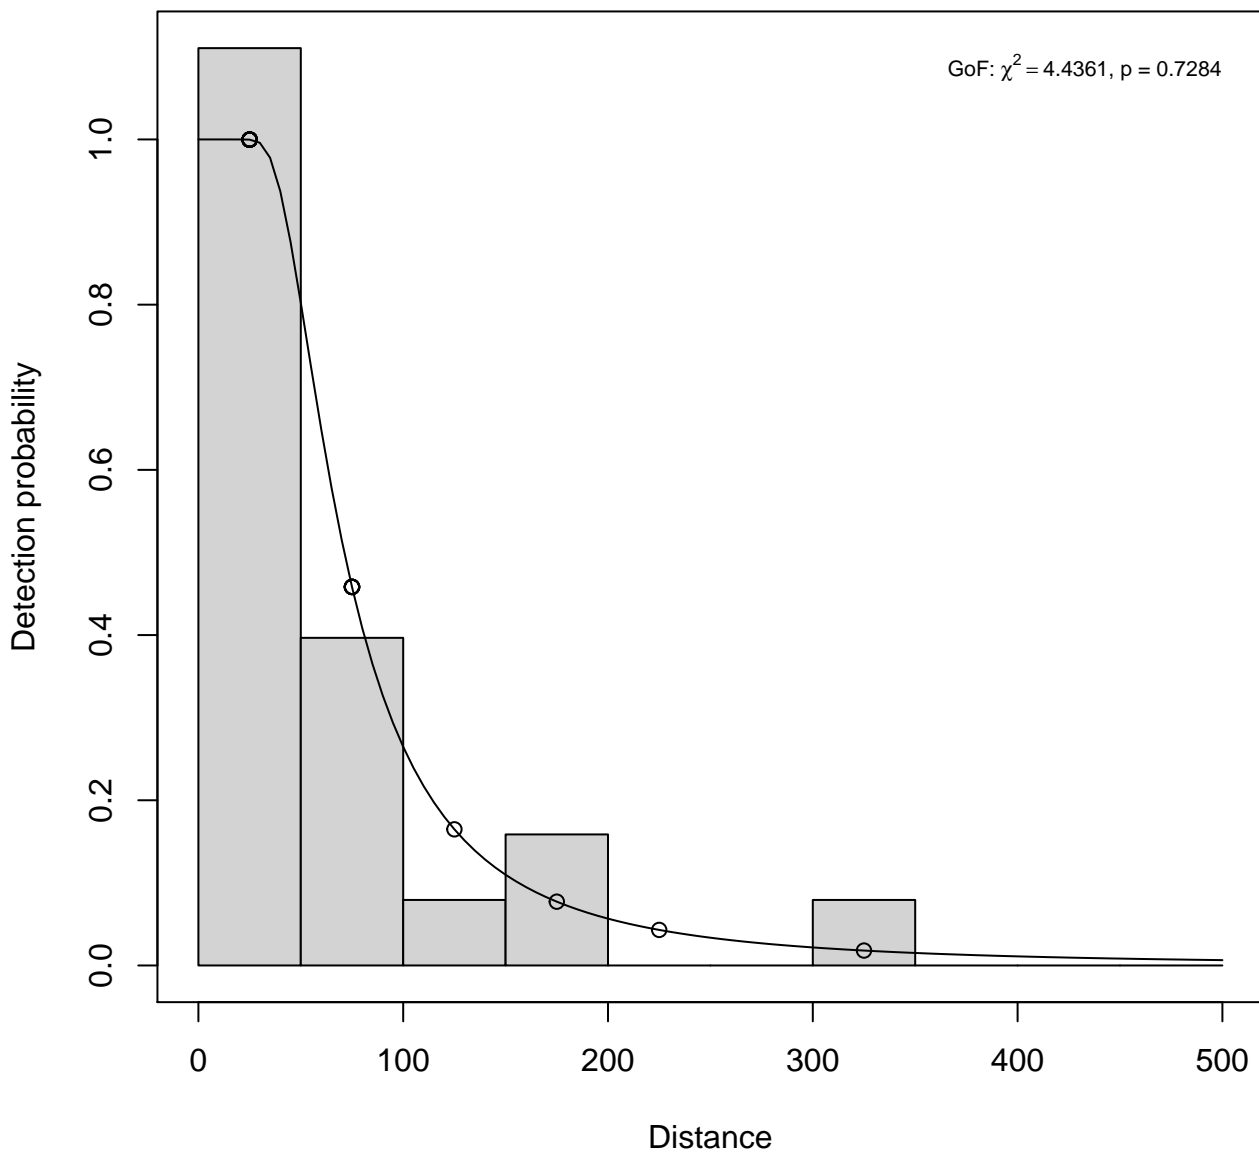

*Diopsittaca cumanensis* – Cerrado – Brazil (N = 23, key function = hr)

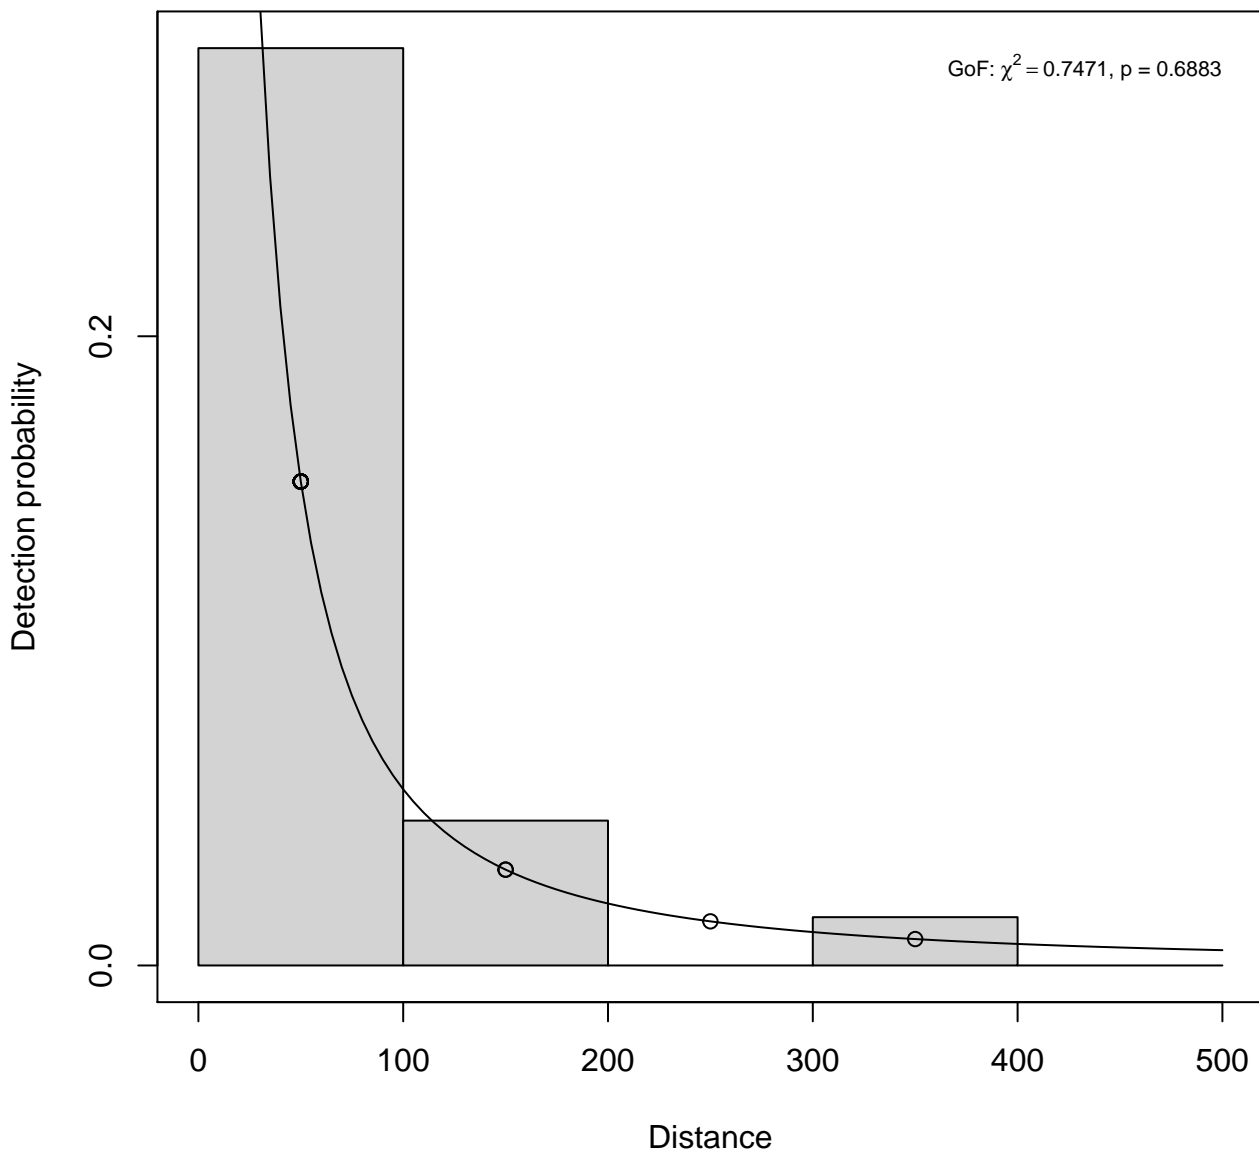

*Diopsittaca cumanensis* – Cerrado – Brazil (N = 23, key function = hr)

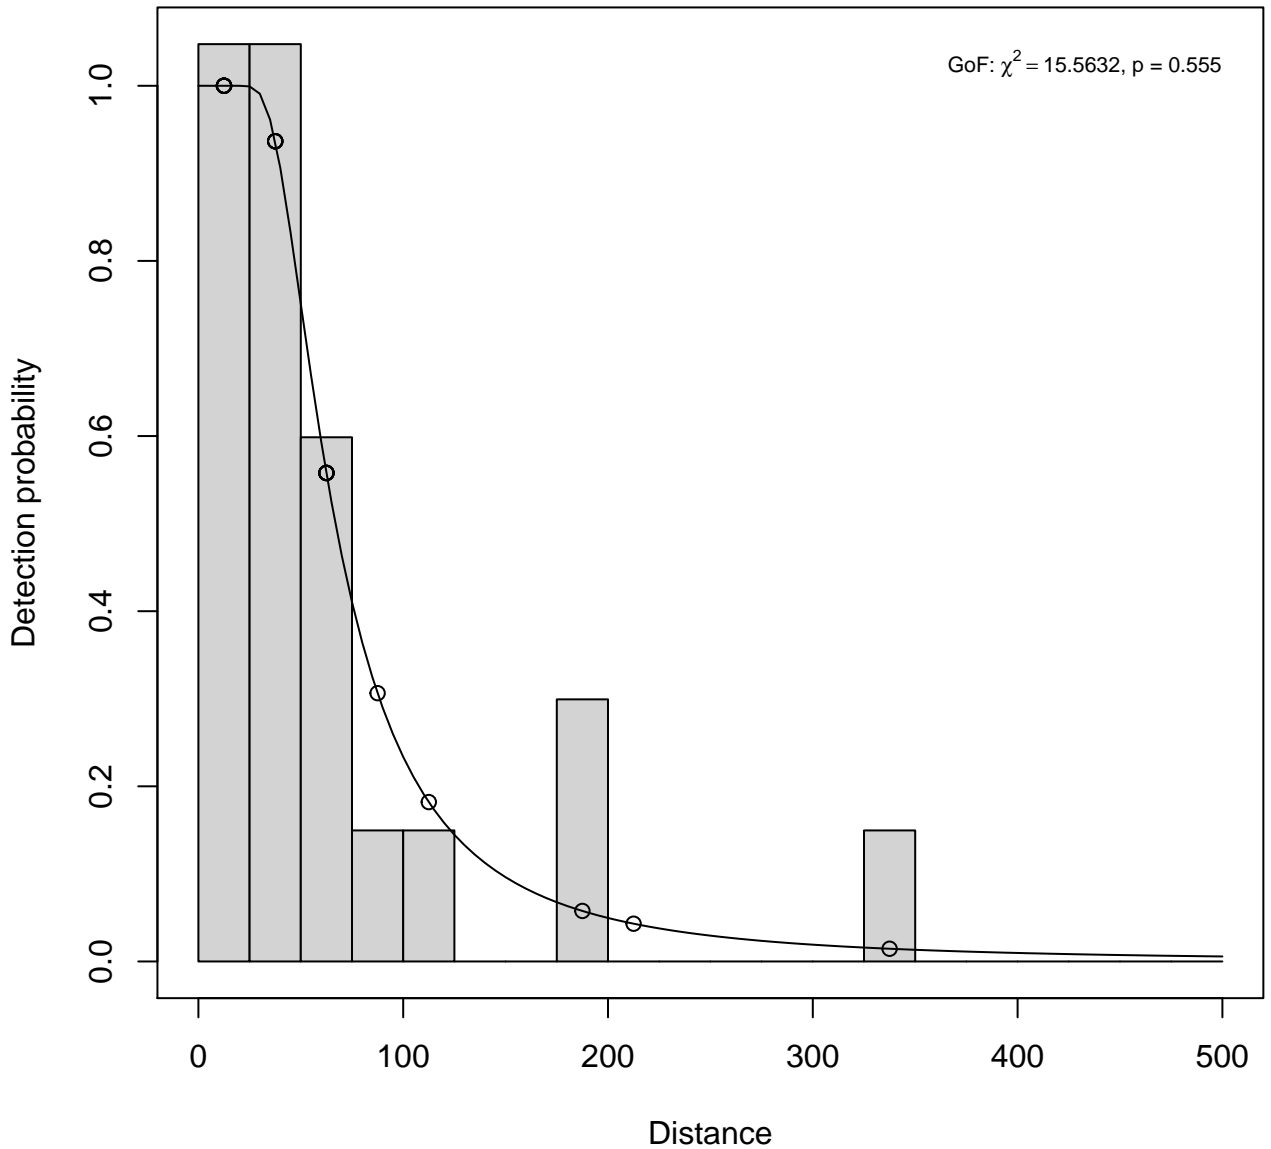

Supplement: s1 [file s1]
