# Supplementary material
Source: MDPI journal article supplement (https://www.mdpi.com/1424-2818/13/7/300)

# **Eupsittula aurea – Beni savanna – Bolivia**

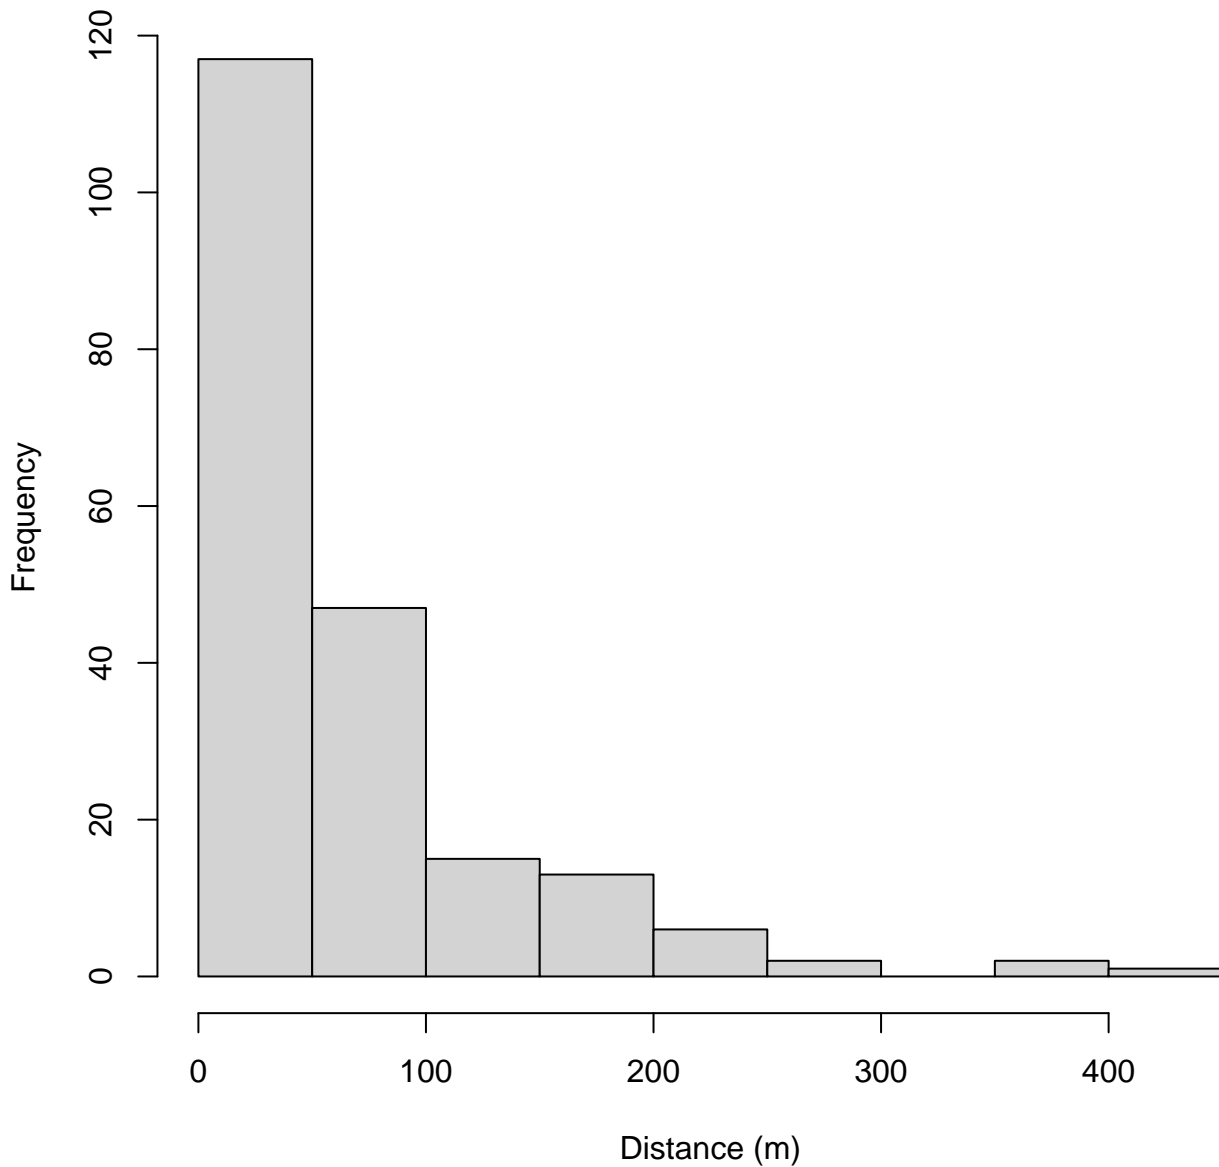

**Eupsittula aurea – Beni savanna – Bolivia**

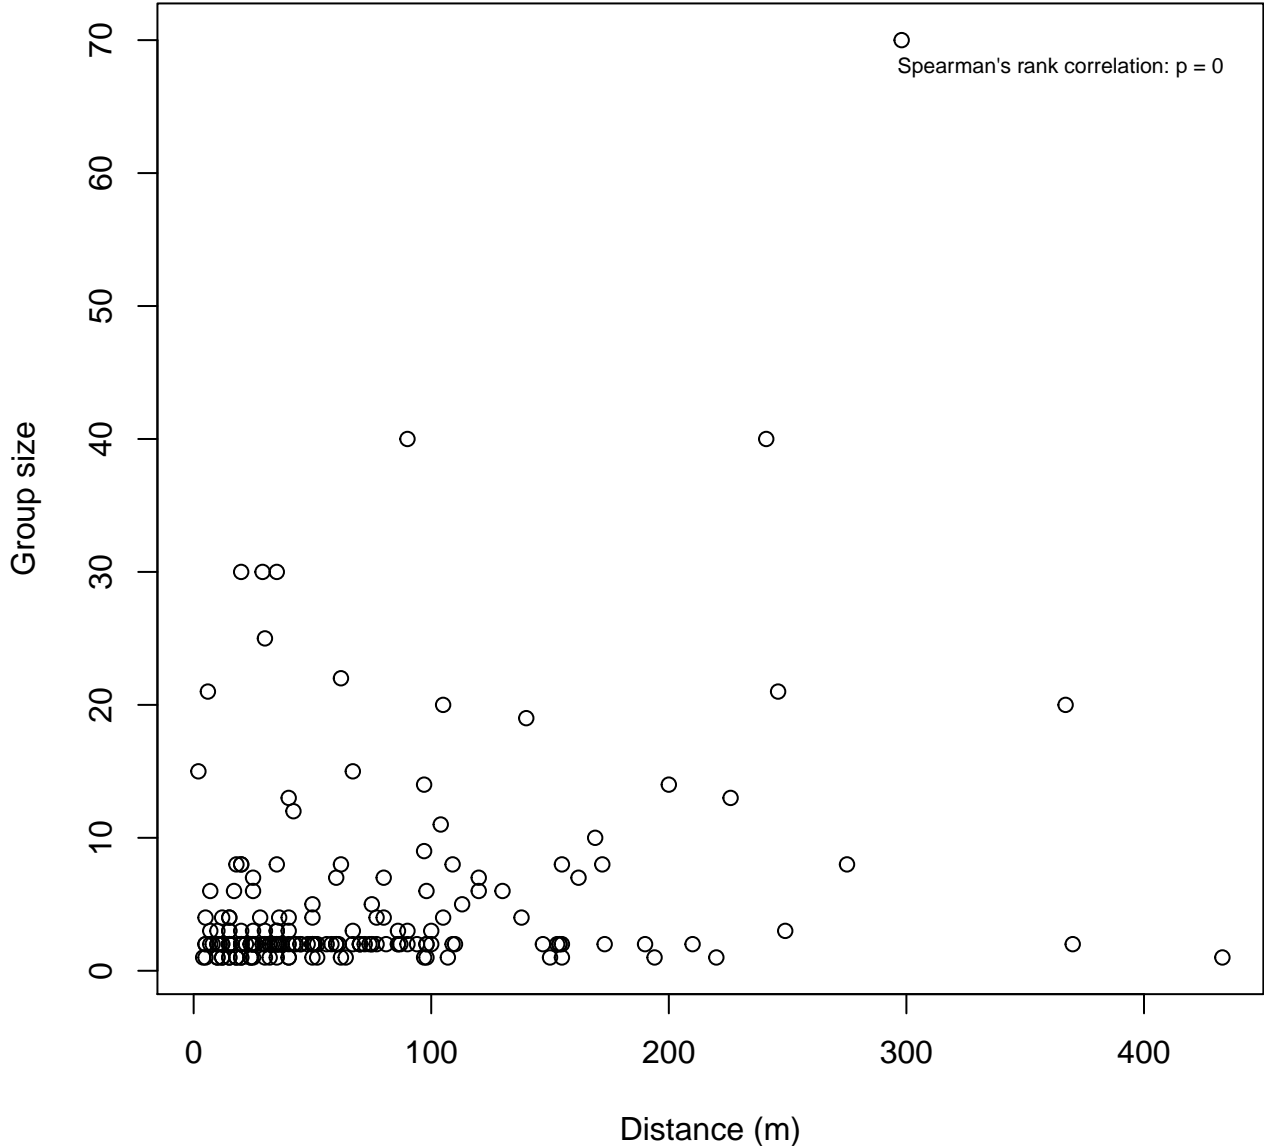

Eupsittula aurea – Beni savanna – Bolivia (N = 203, key function = hr)

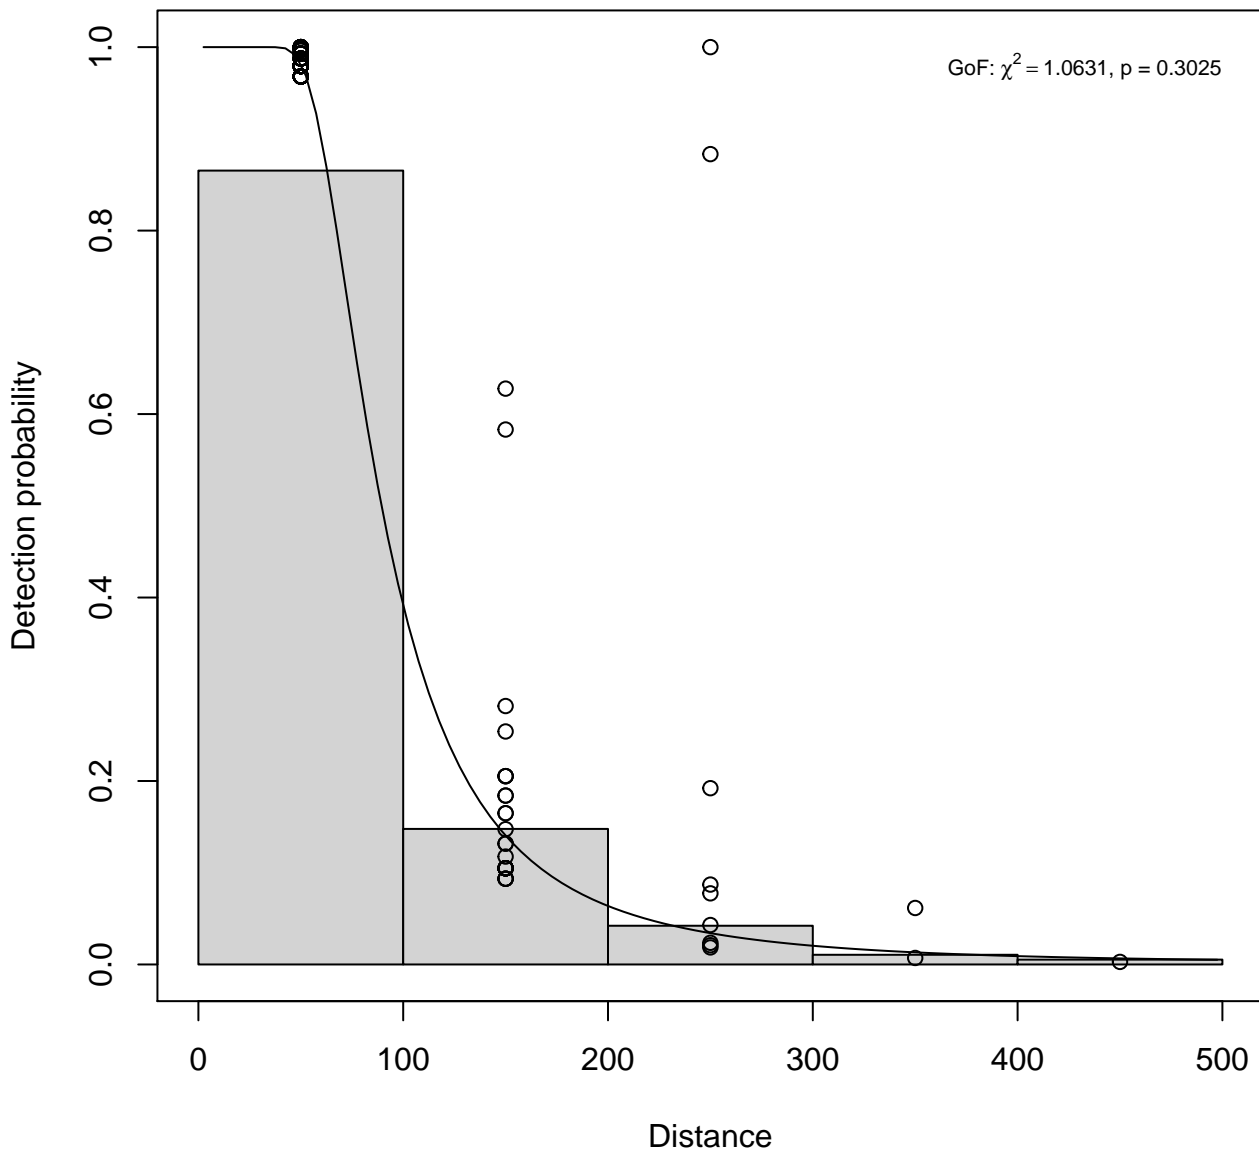

Eupsittula aurea – Beni savanna – Bolivia (N = 203, key function = hr)

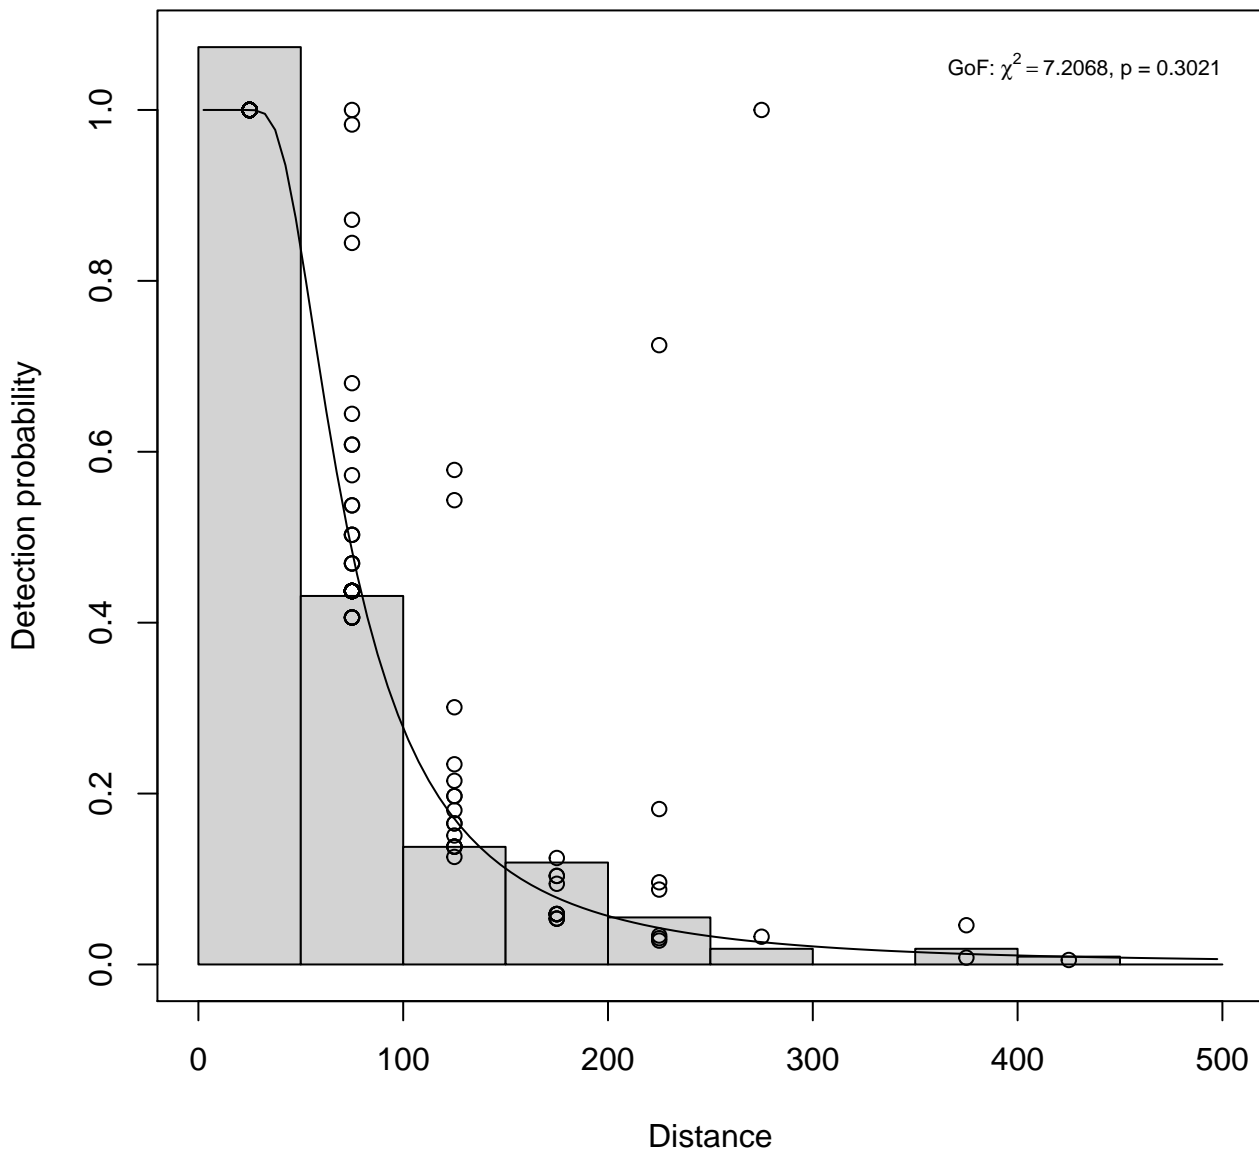

Eupsittula aurea – Beni savanna – Bolivia (N = 203, key function = hr)

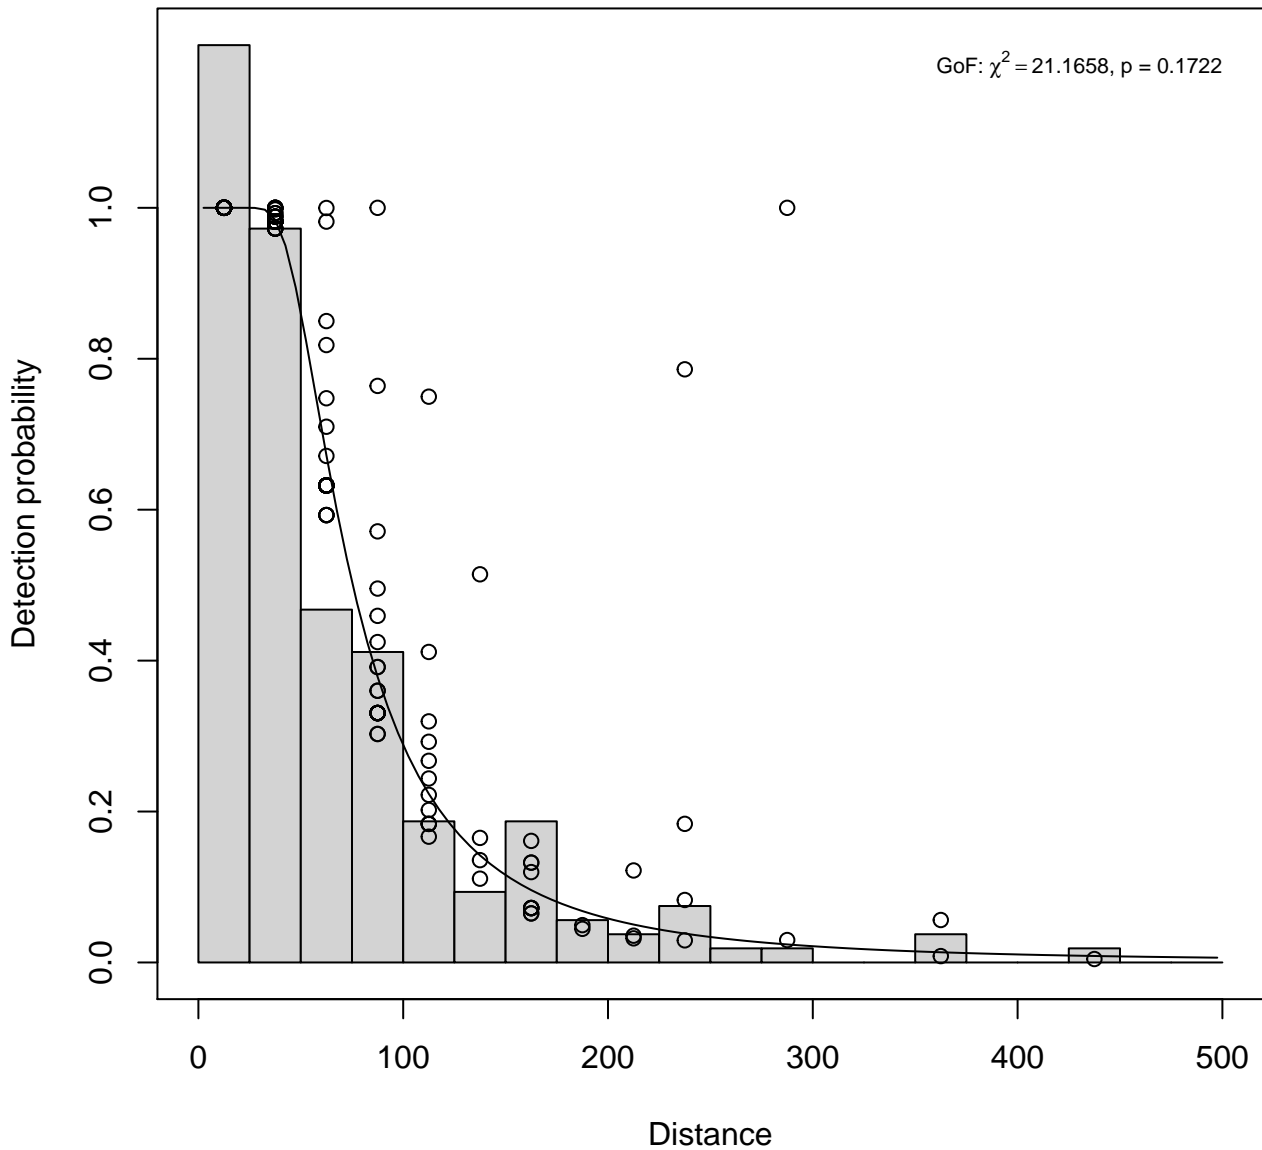

Supplement: s1 [file s1]
