# Supplementary material
Source: MDPI journal article supplement (https://www.mdpi.com/1424-2818/13/7/300)

# ***Psittacula chloropterus* – Hispaniolan moist forests – Dominican Republic**

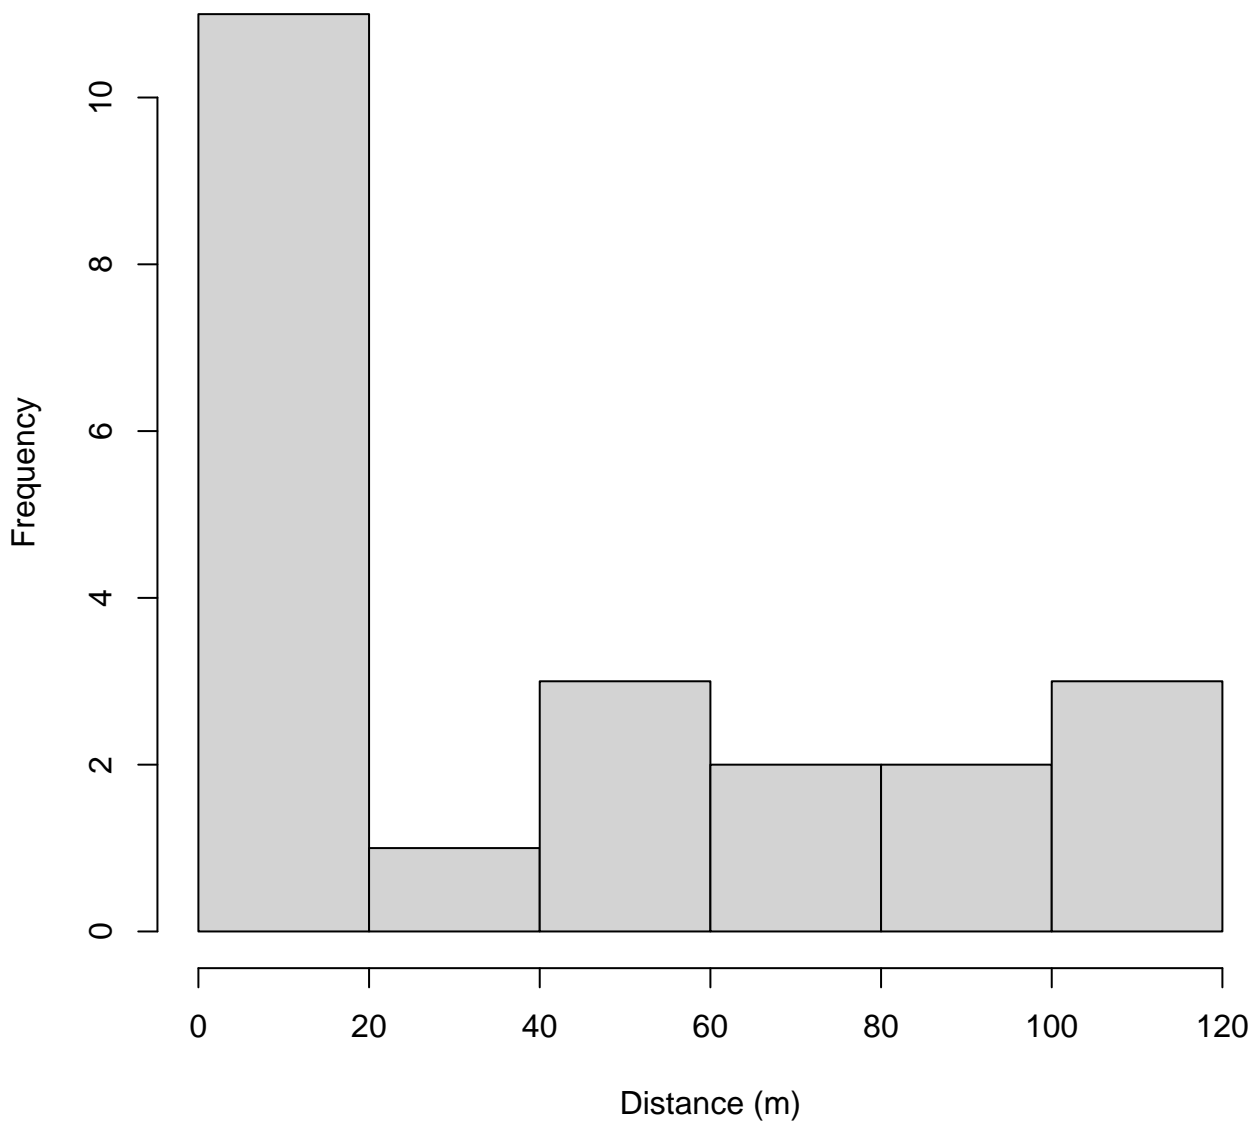

# **Psittacula chloropterus – Hispaniolan moist forests – Dominican Republic**

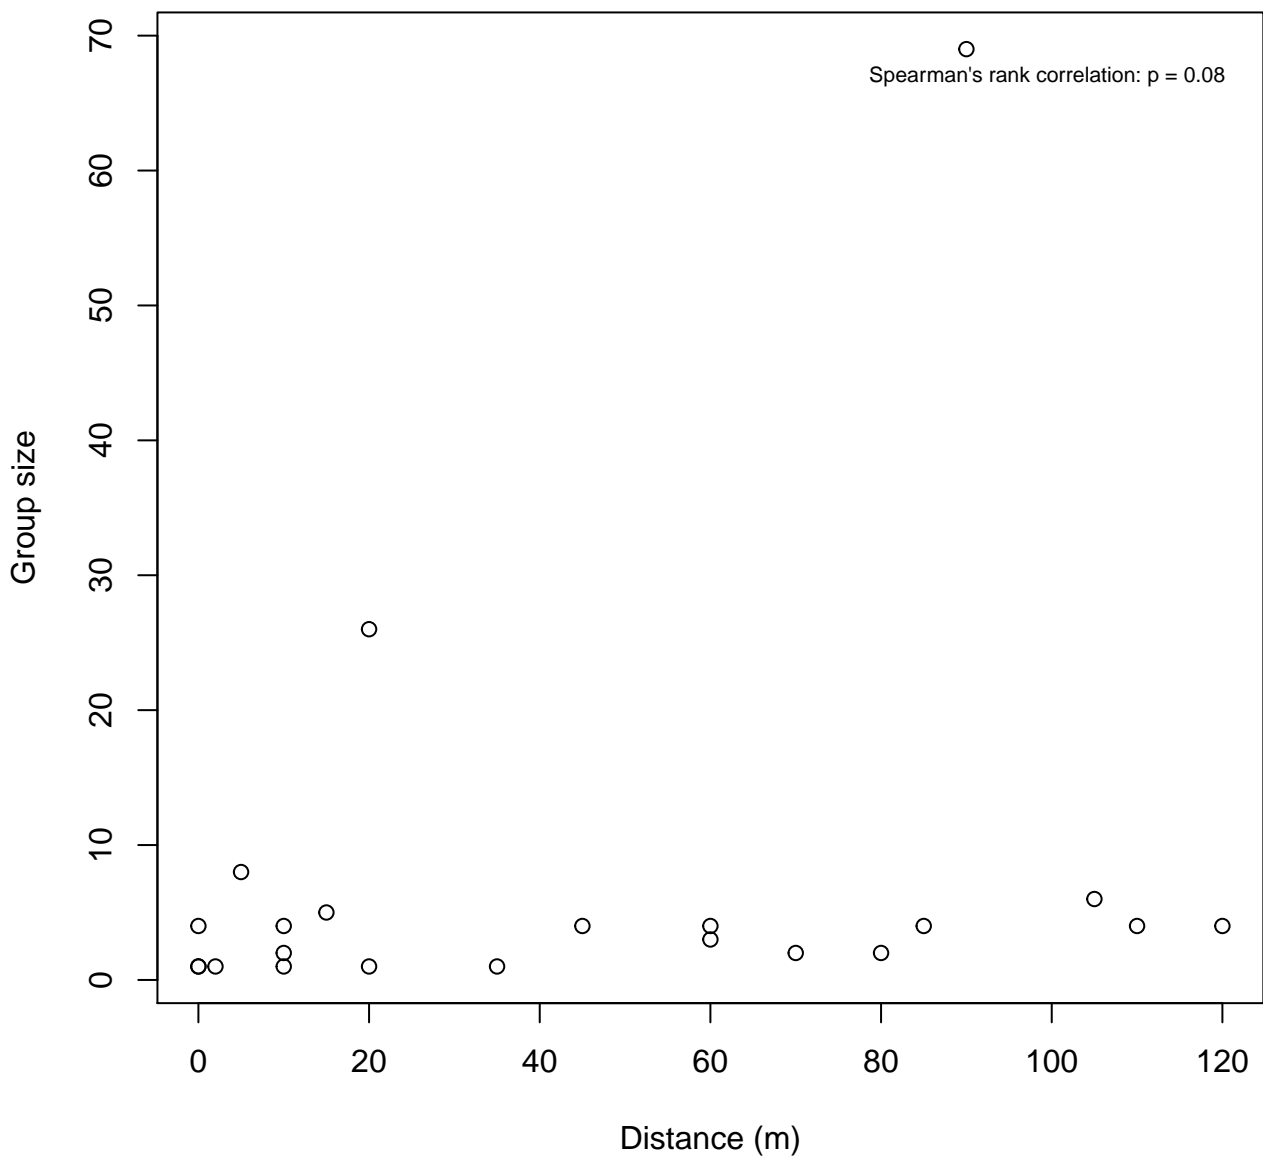

*Psittacula chloropterus* – Hispaniolan moist forests – Dominican Republic (N = 22, key function = hn)

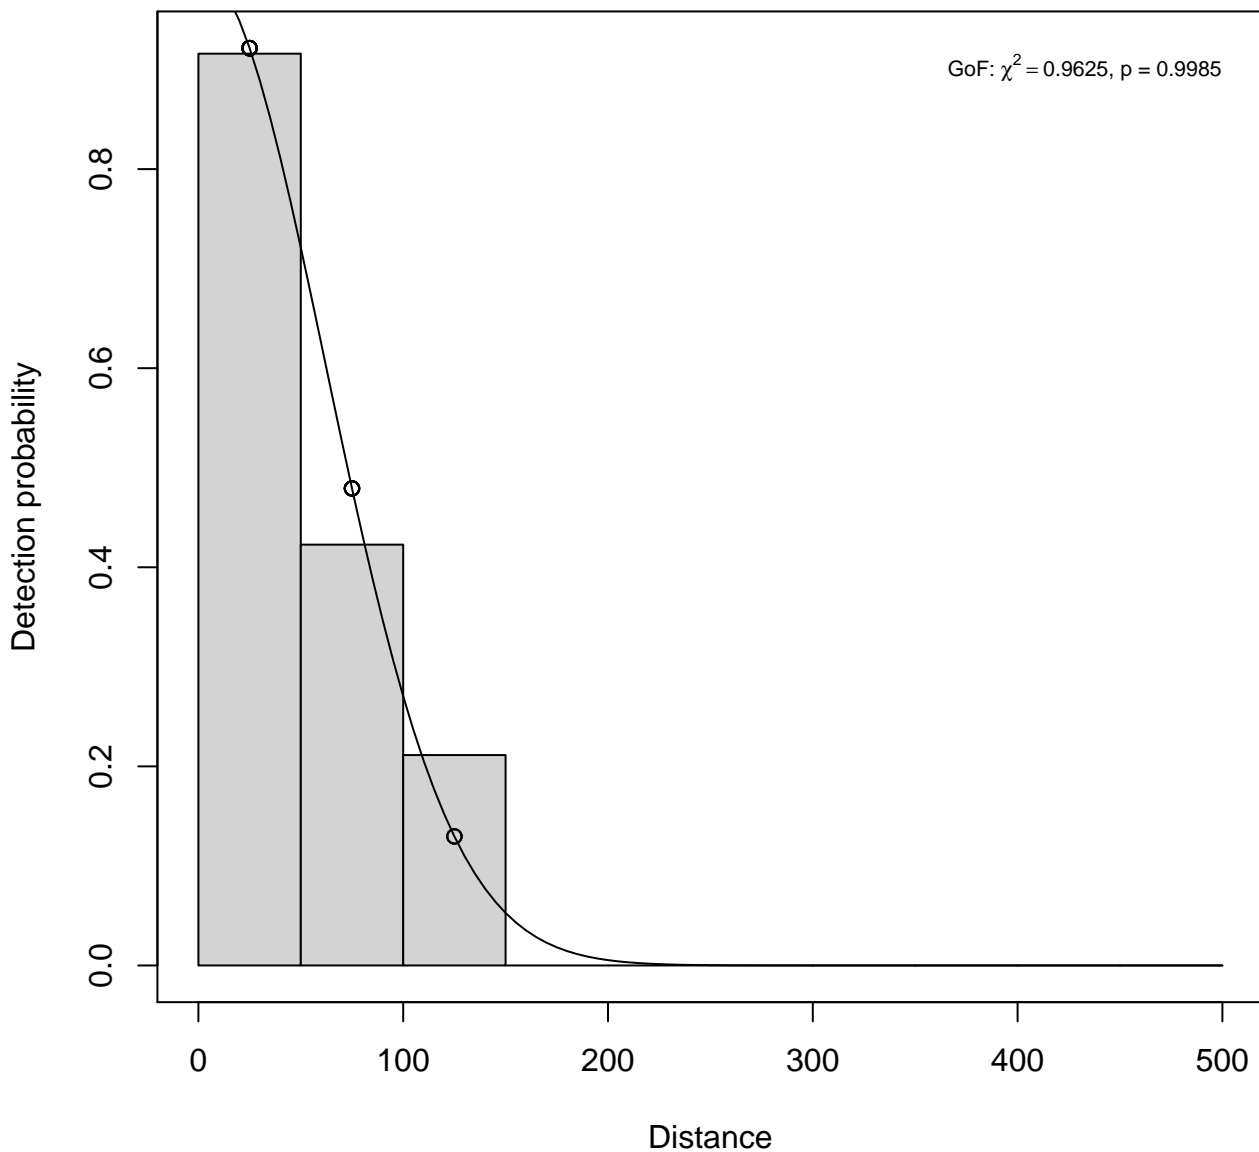

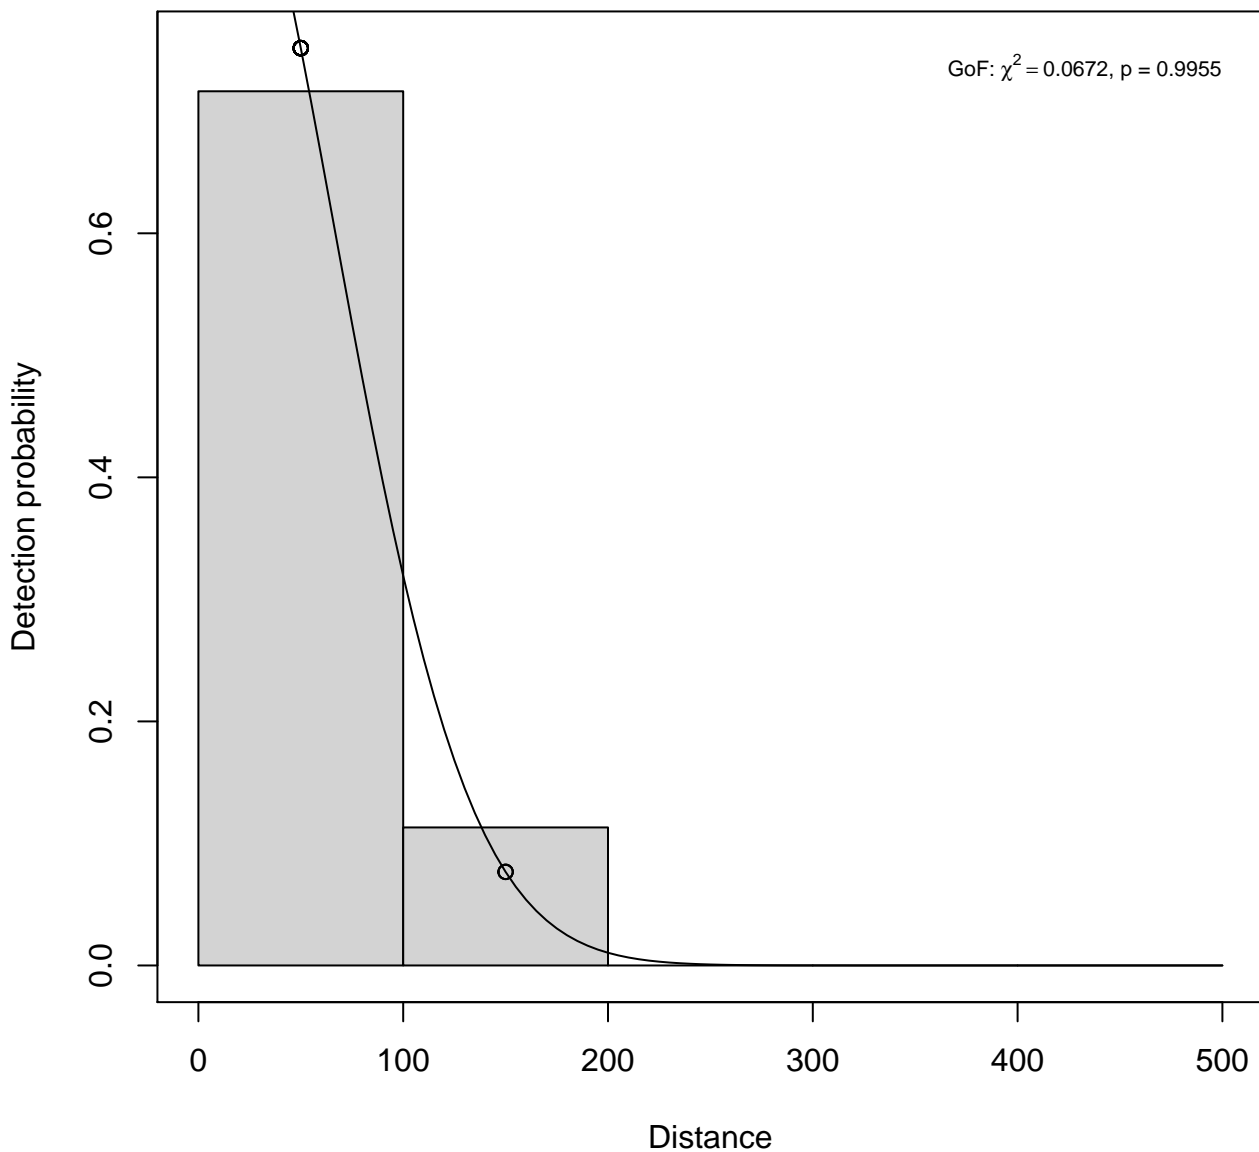

*Psittacula chloropterus* – Hispaniolan moist forests – Dominican Republic (N = 22, key function = hn)

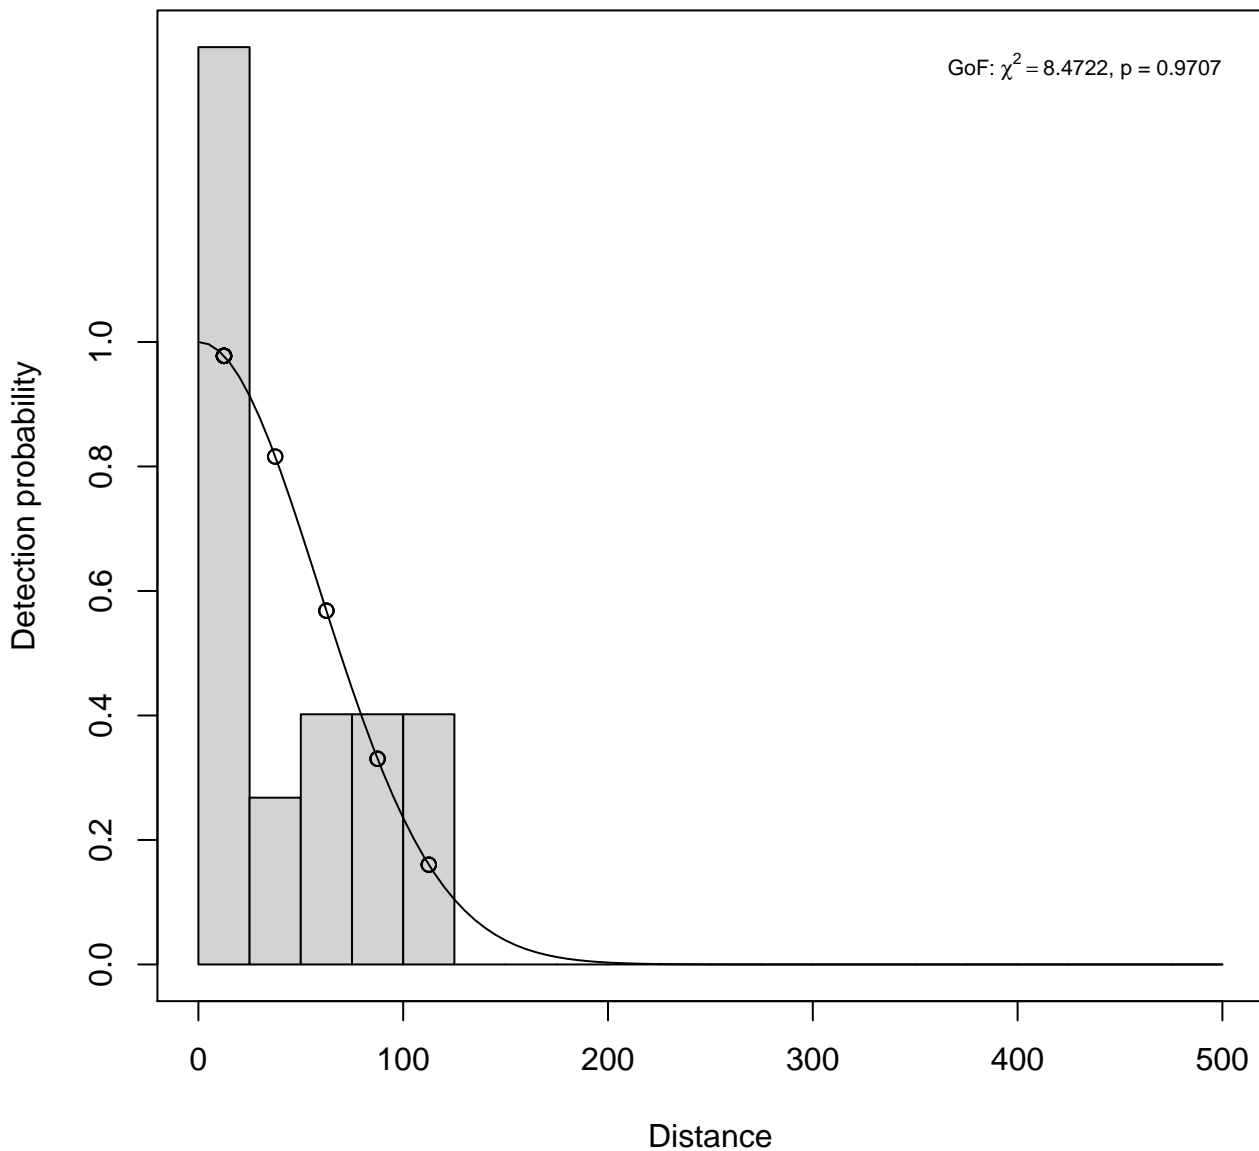

Supplement: s1 [file s1]
