# Supplementary material
Source: MDPI journal article supplement (https://www.mdpi.com/1424-2818/13/7/300)

# **Amazona autumnalis – Isthmian–Pacific moist forests – Costa Rica**

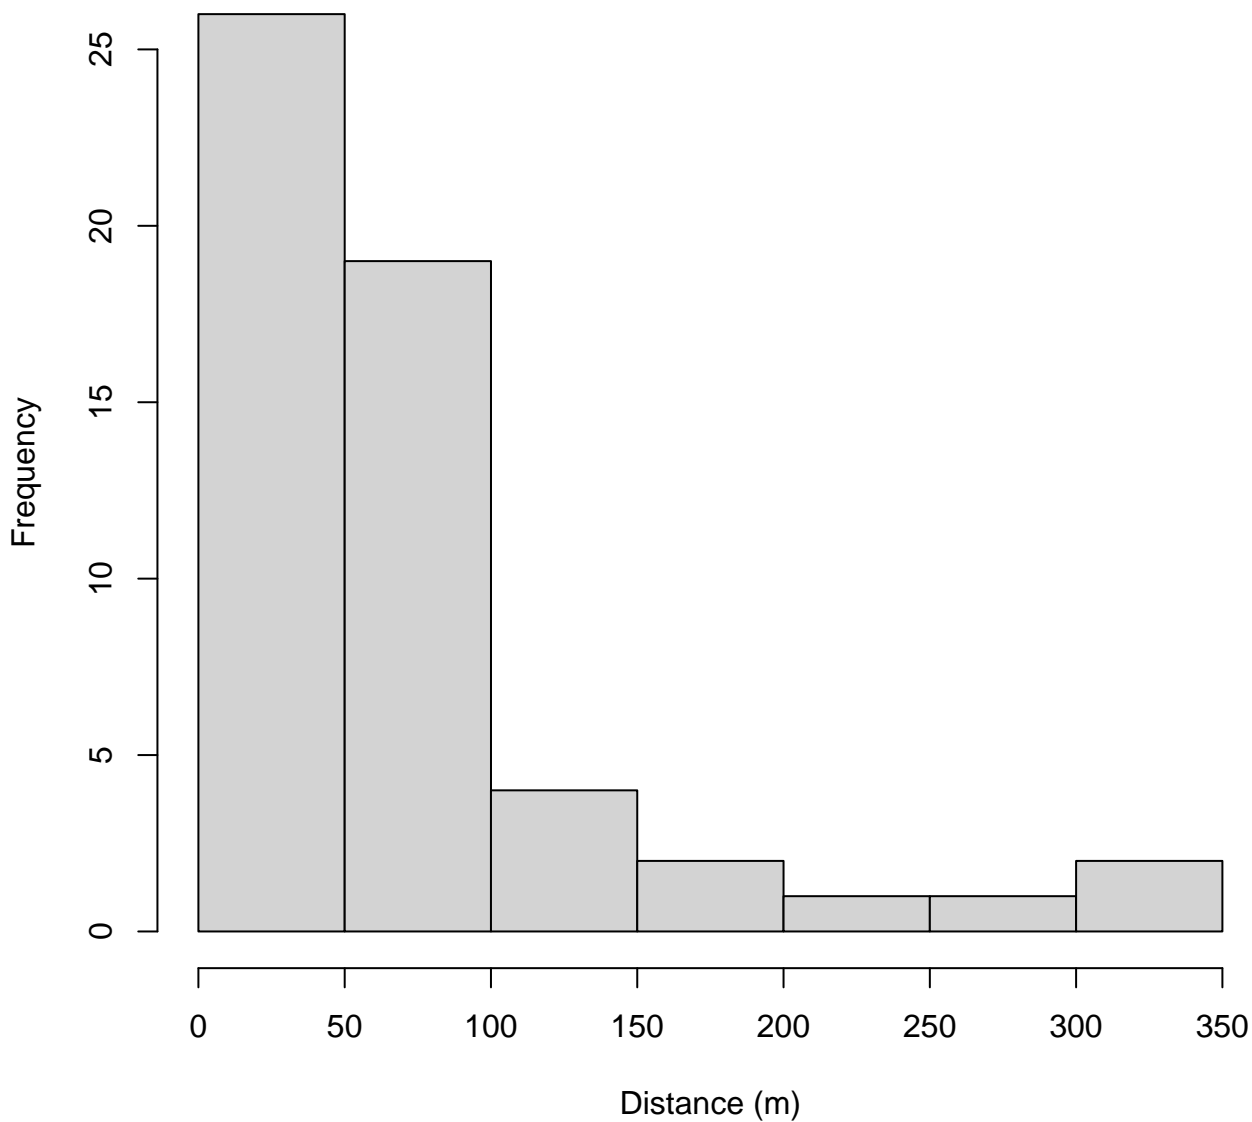

# Amazona autumnalis – Isthmian–Pacific moist forests – Costa Rica

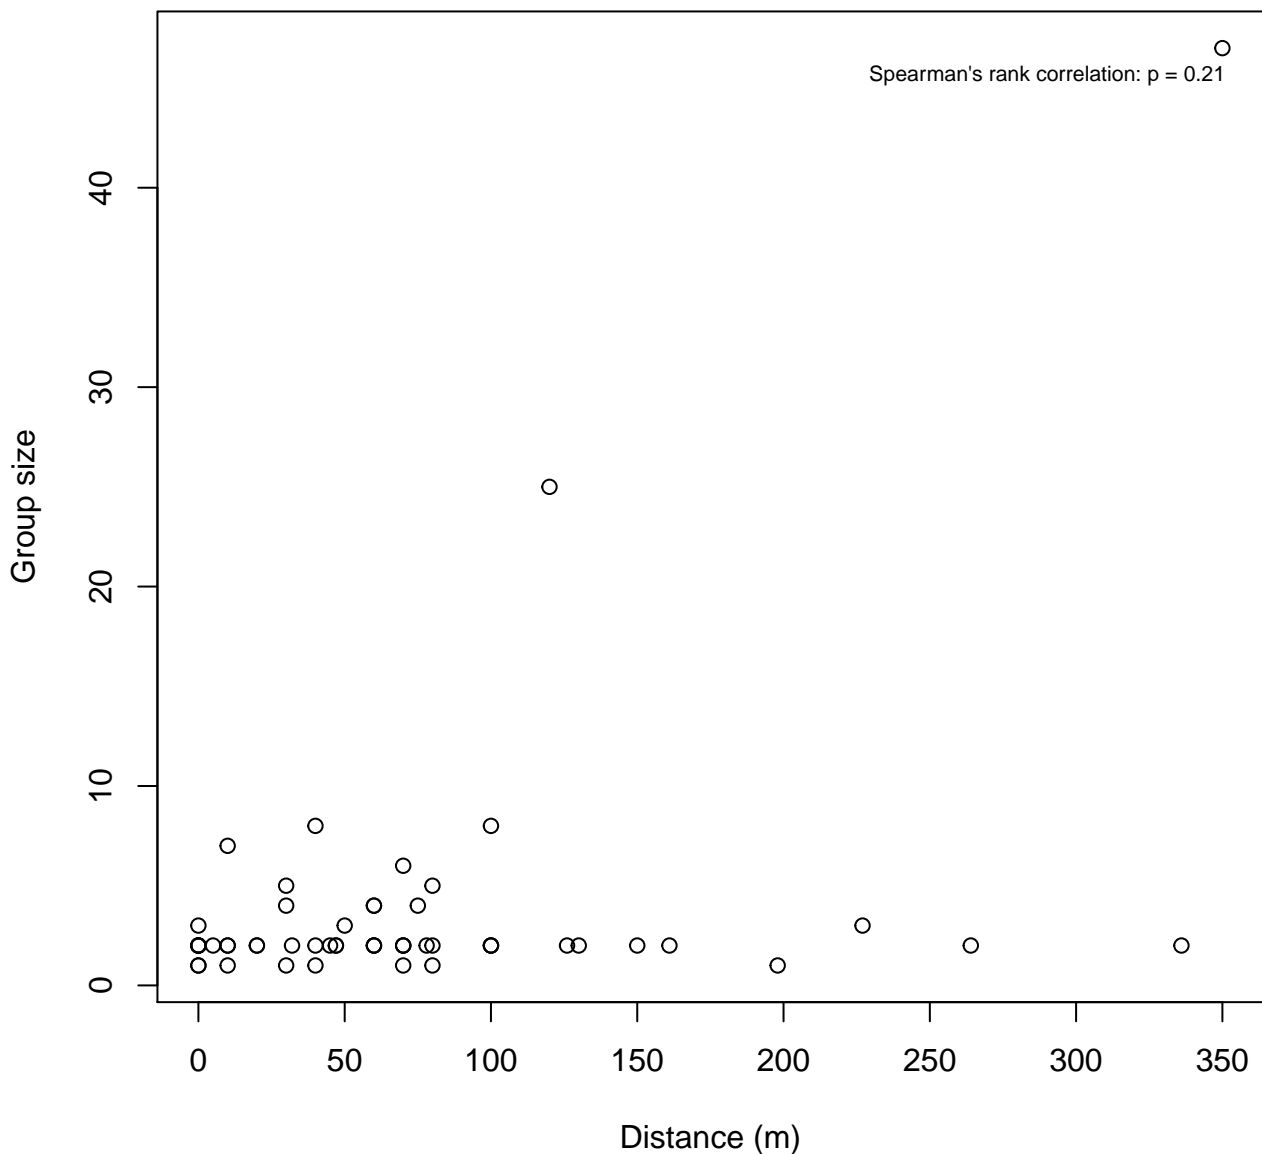

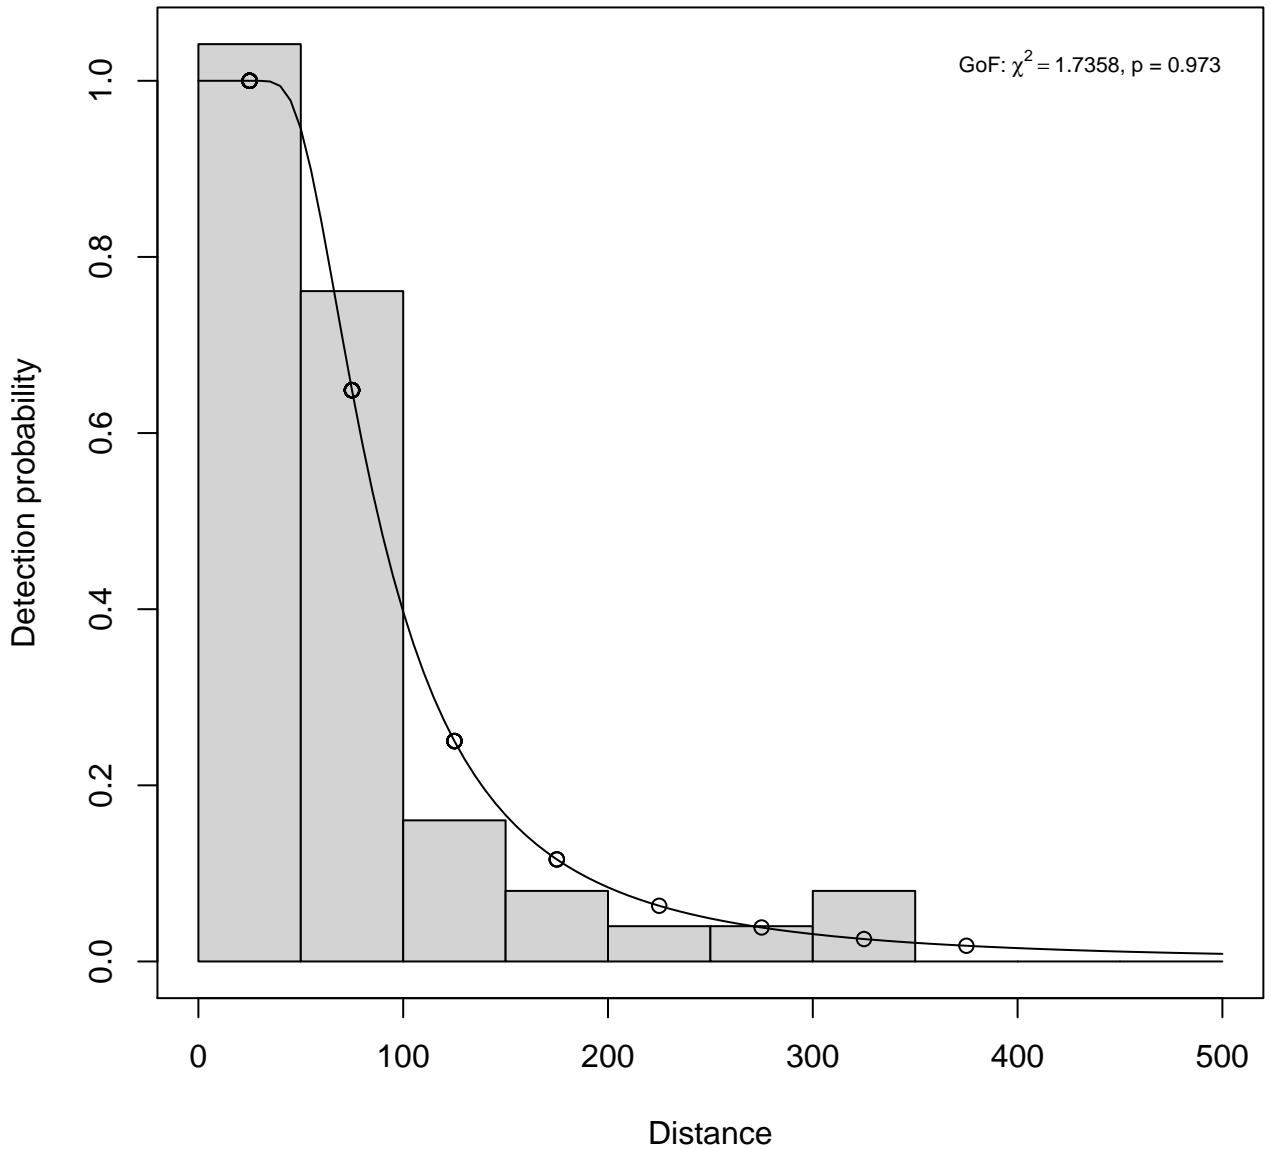

Amazona autumnalis – Isthmian–Pacific moist forests – Costa Rica (N = 55, key function = hr)

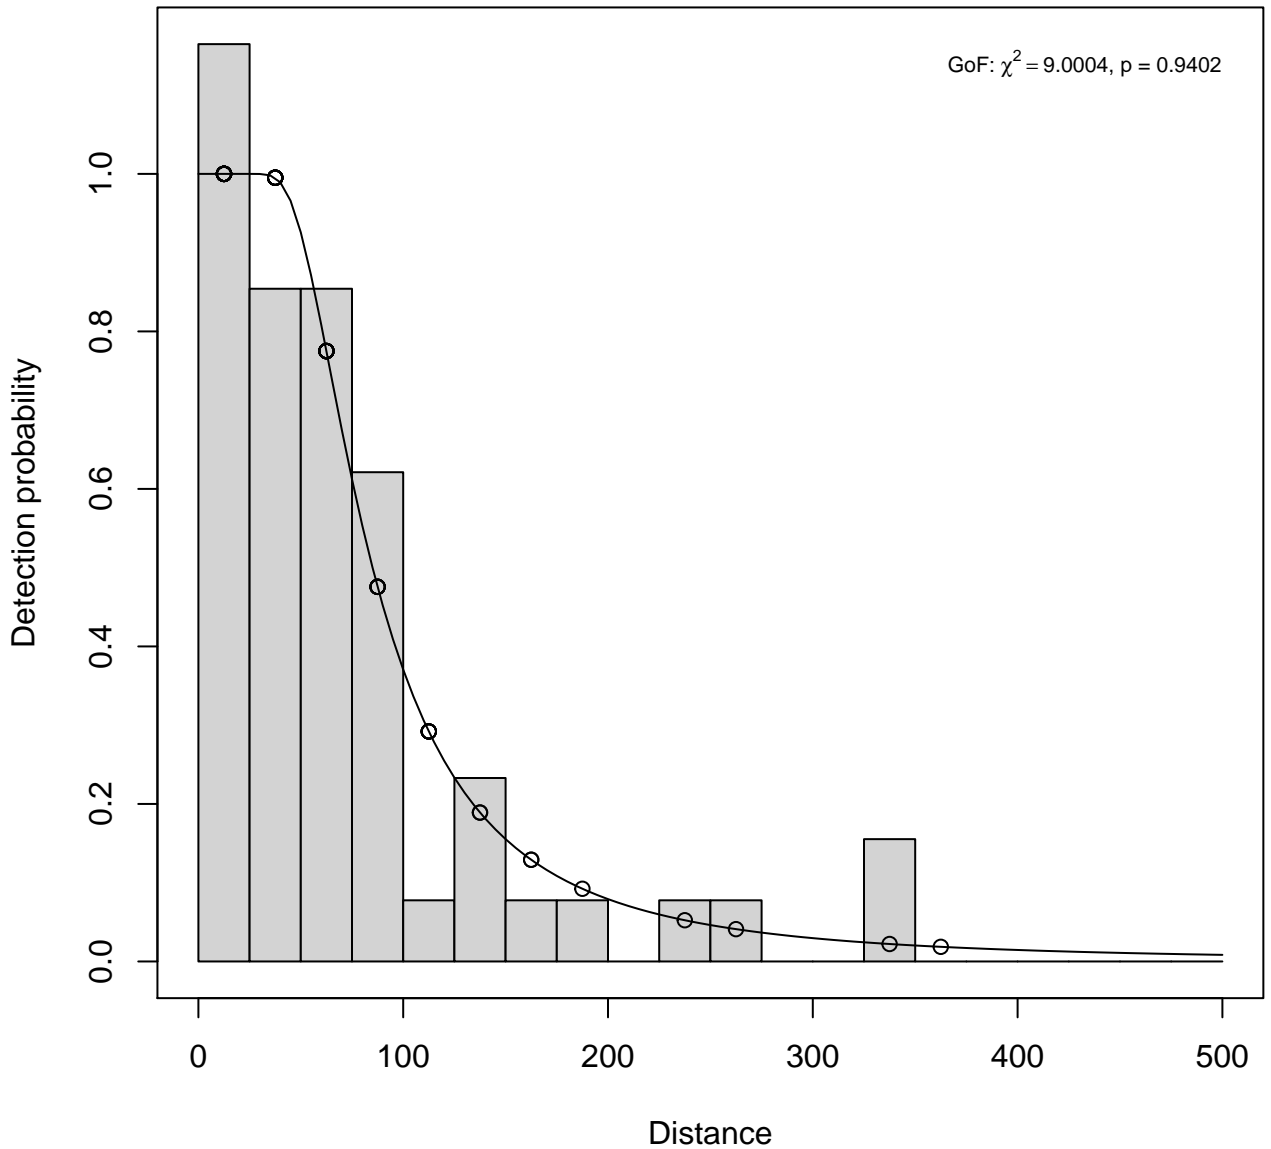

*Amazona autumnalis* – Isthmian–Pacific moist forests – Costa Rica (N = 55, key function = hr)

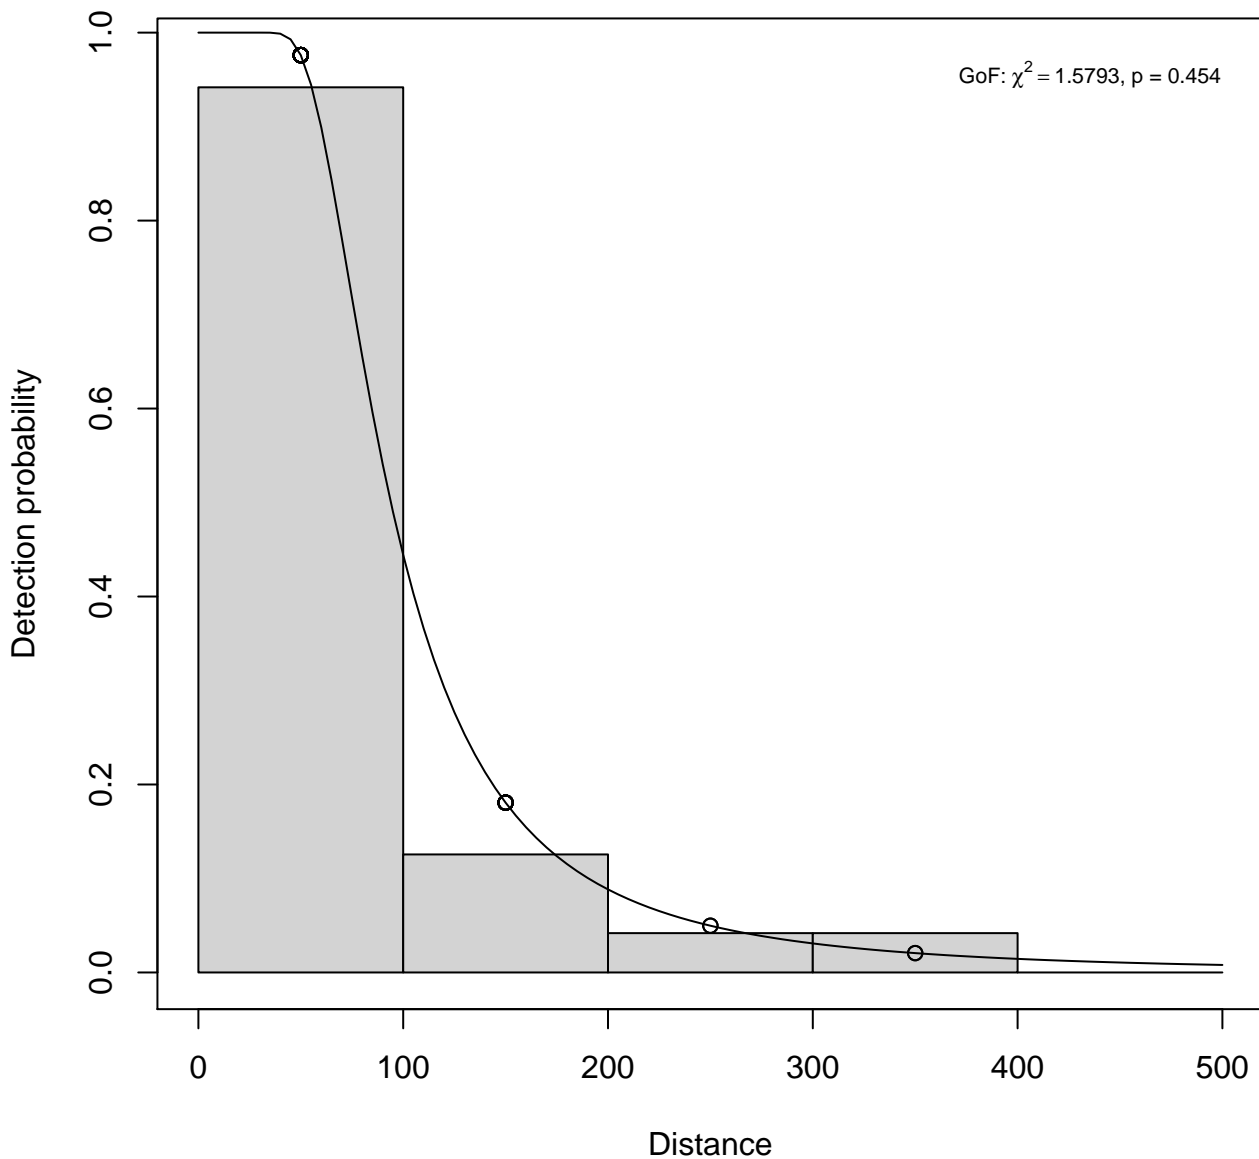

Supplement: s1 [file s1]
