# Supplementary material
Source: MDPI journal article supplement (https://www.mdpi.com/1424-2818/13/7/300)

# **Cyanoliseus patagonus – Patagonian steppe – Argentina**

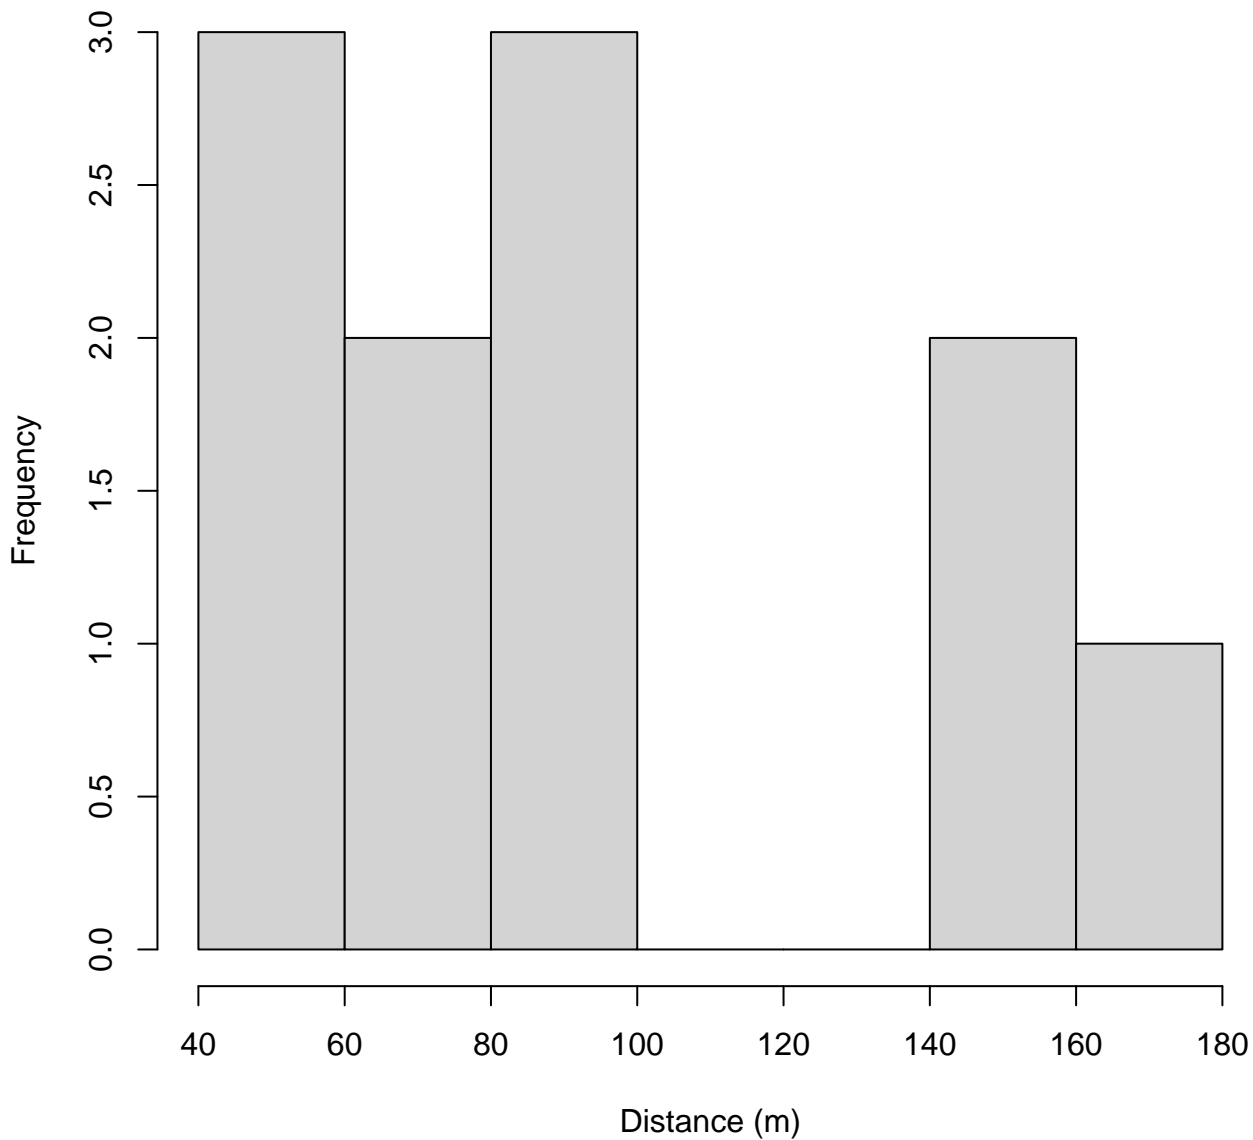

# Cyanoliseus patagonus – Patagonian steppe – Argentina

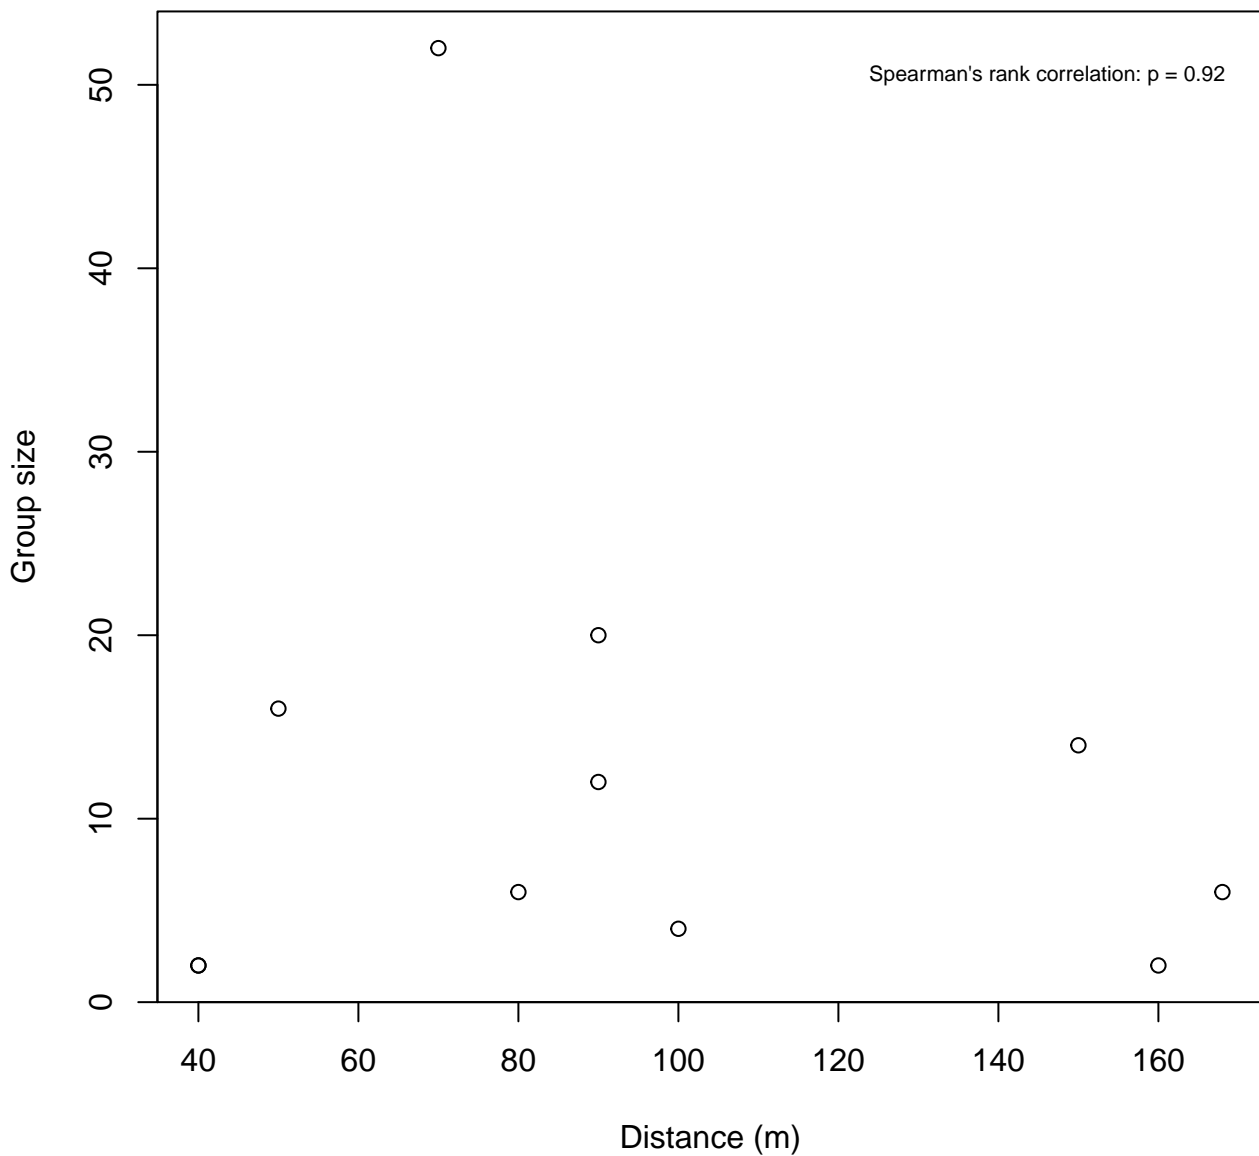

Cyanoliseus patagonus – Patagonian steppe – Argentina (N = 11, key function = hn)

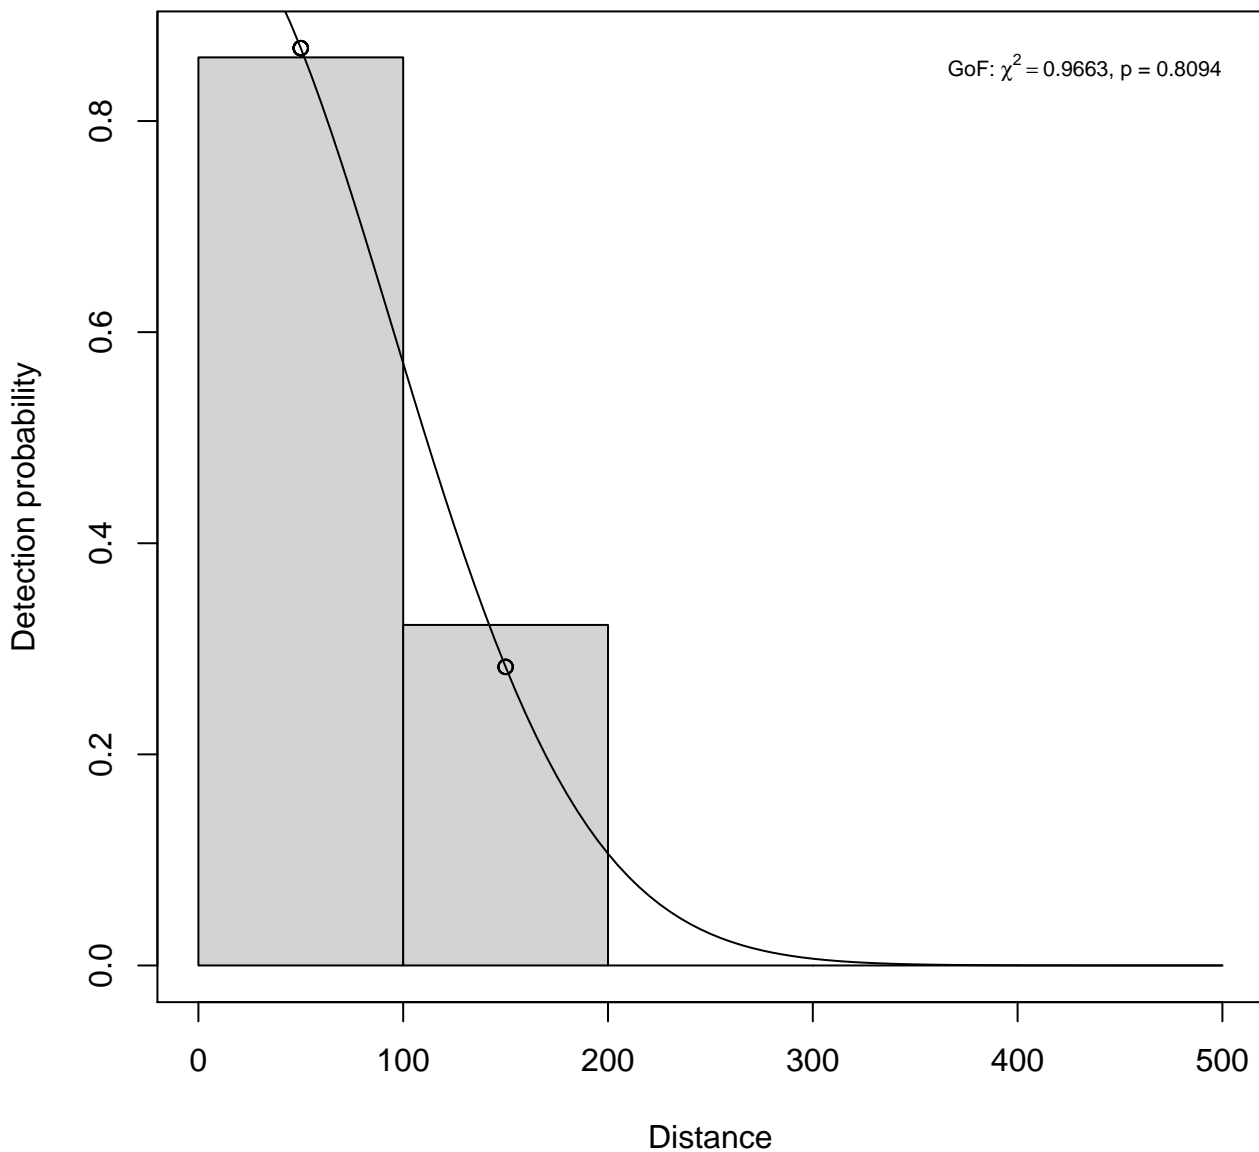

Cyanoliseus patagonus – Patagonian steppe – Argentina (N = 11, key function = hn)

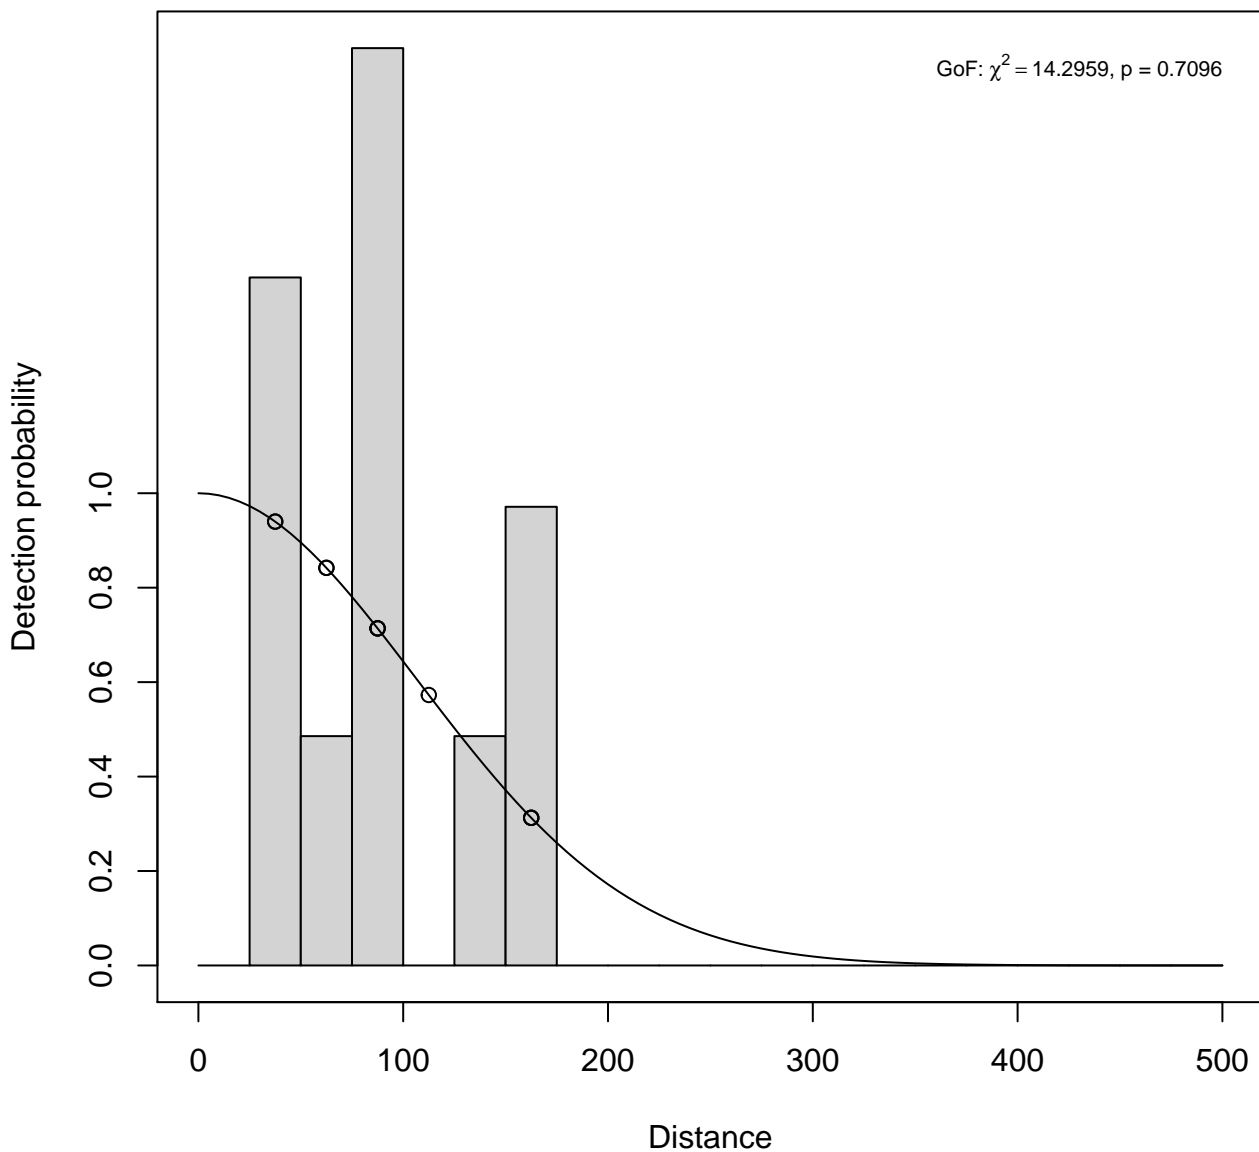

Cyanoliseus patagonus – Patagonian steppe – Argentina (N = 11, key function = hn)

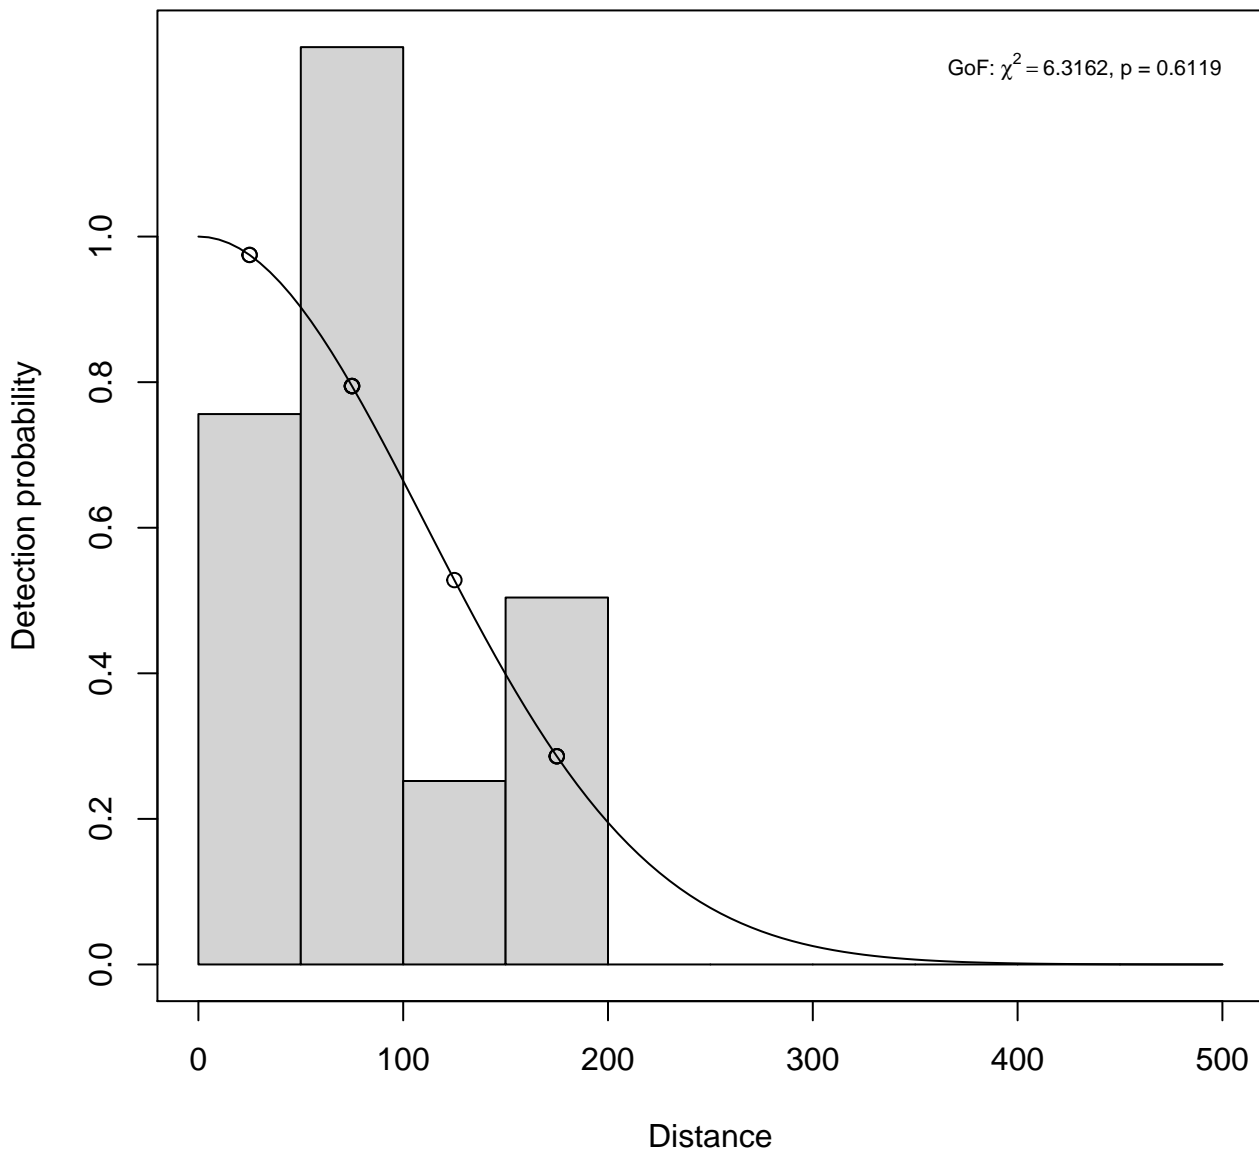

Supplement: s1 [file s1]
