# Supplementary material
Source: MDPI journal article supplement (https://www.mdpi.com/1424-2818/13/7/300)

# **Brotogetis jugularis – Sinu Valley dry forests – Colombia**

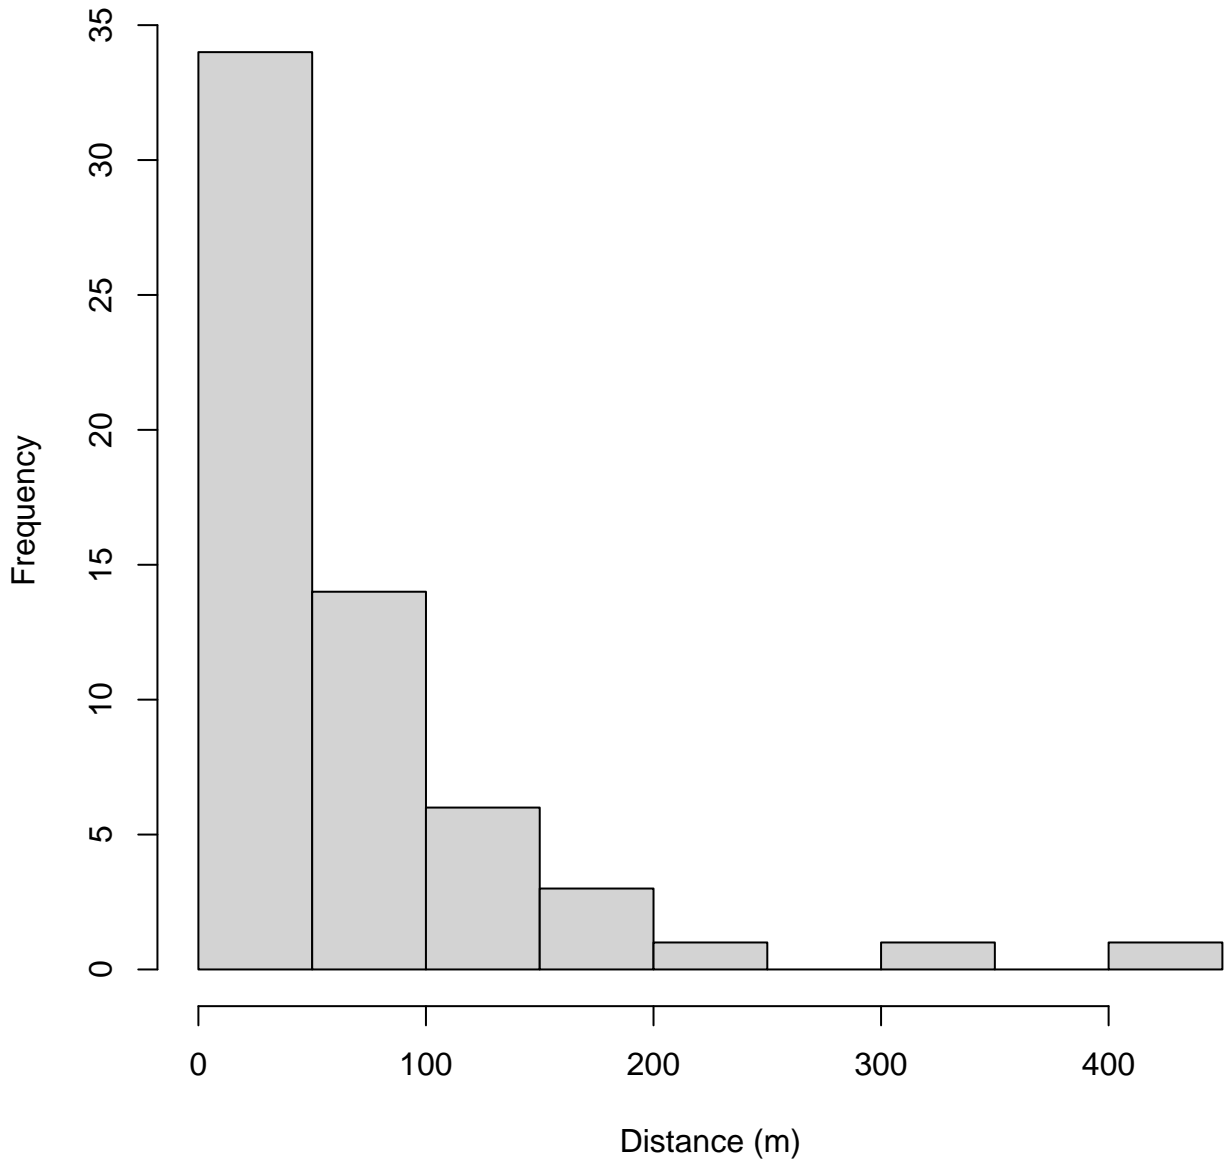

# Brotogeris jugularis – Sinu Valley dry forests – Colombia

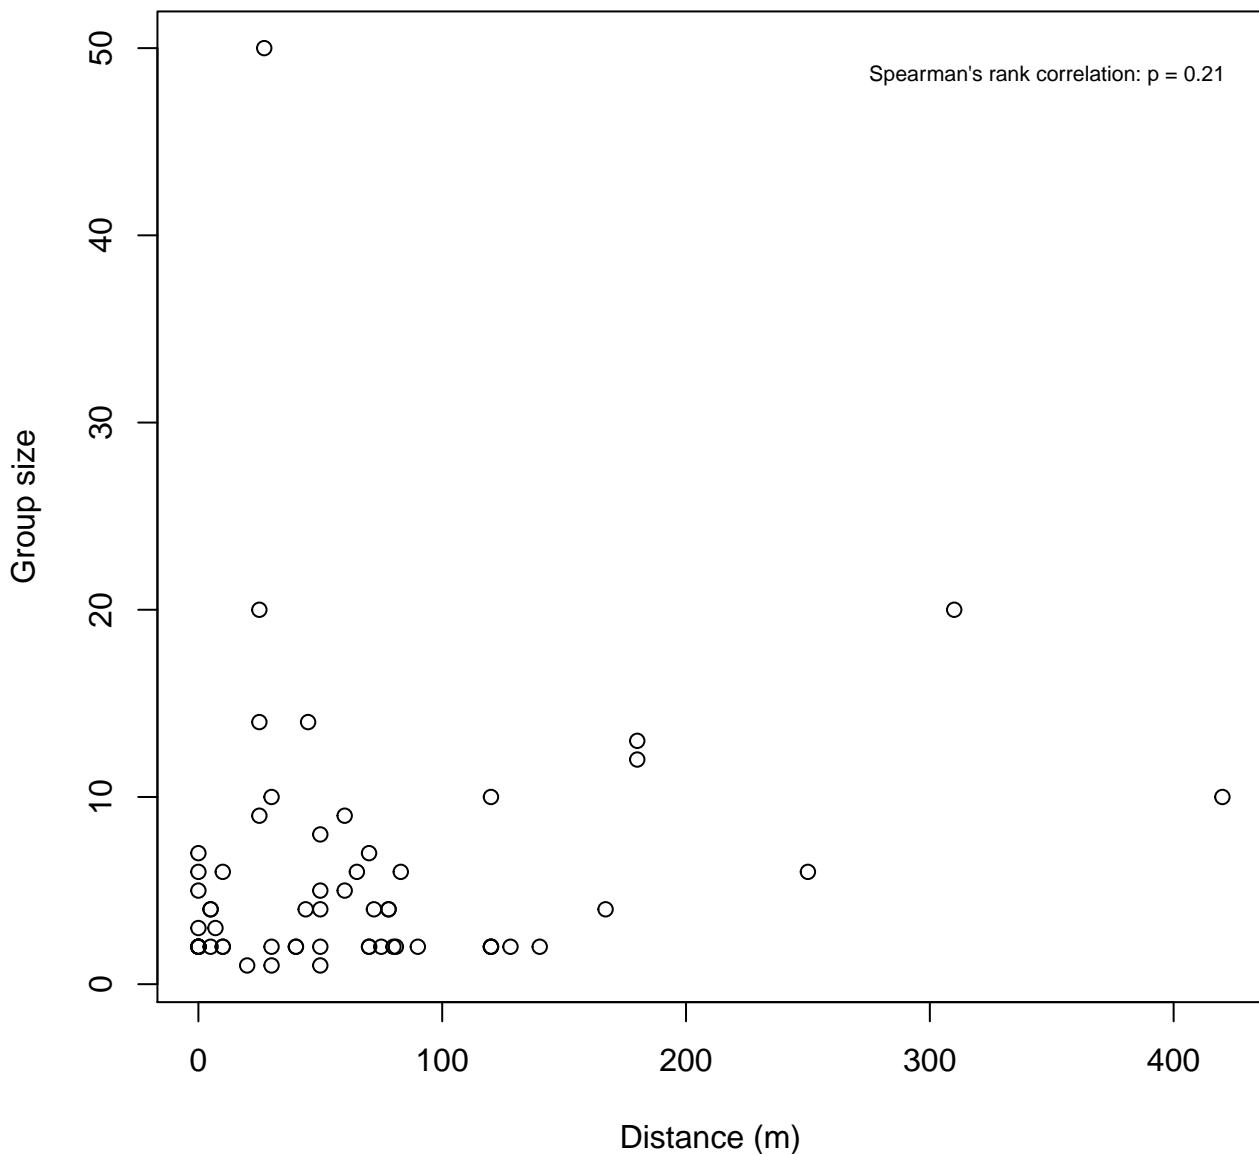

Brotogeris jugularis – Sinu Valley dry forests – Colombia (N = 60, key function = hr)

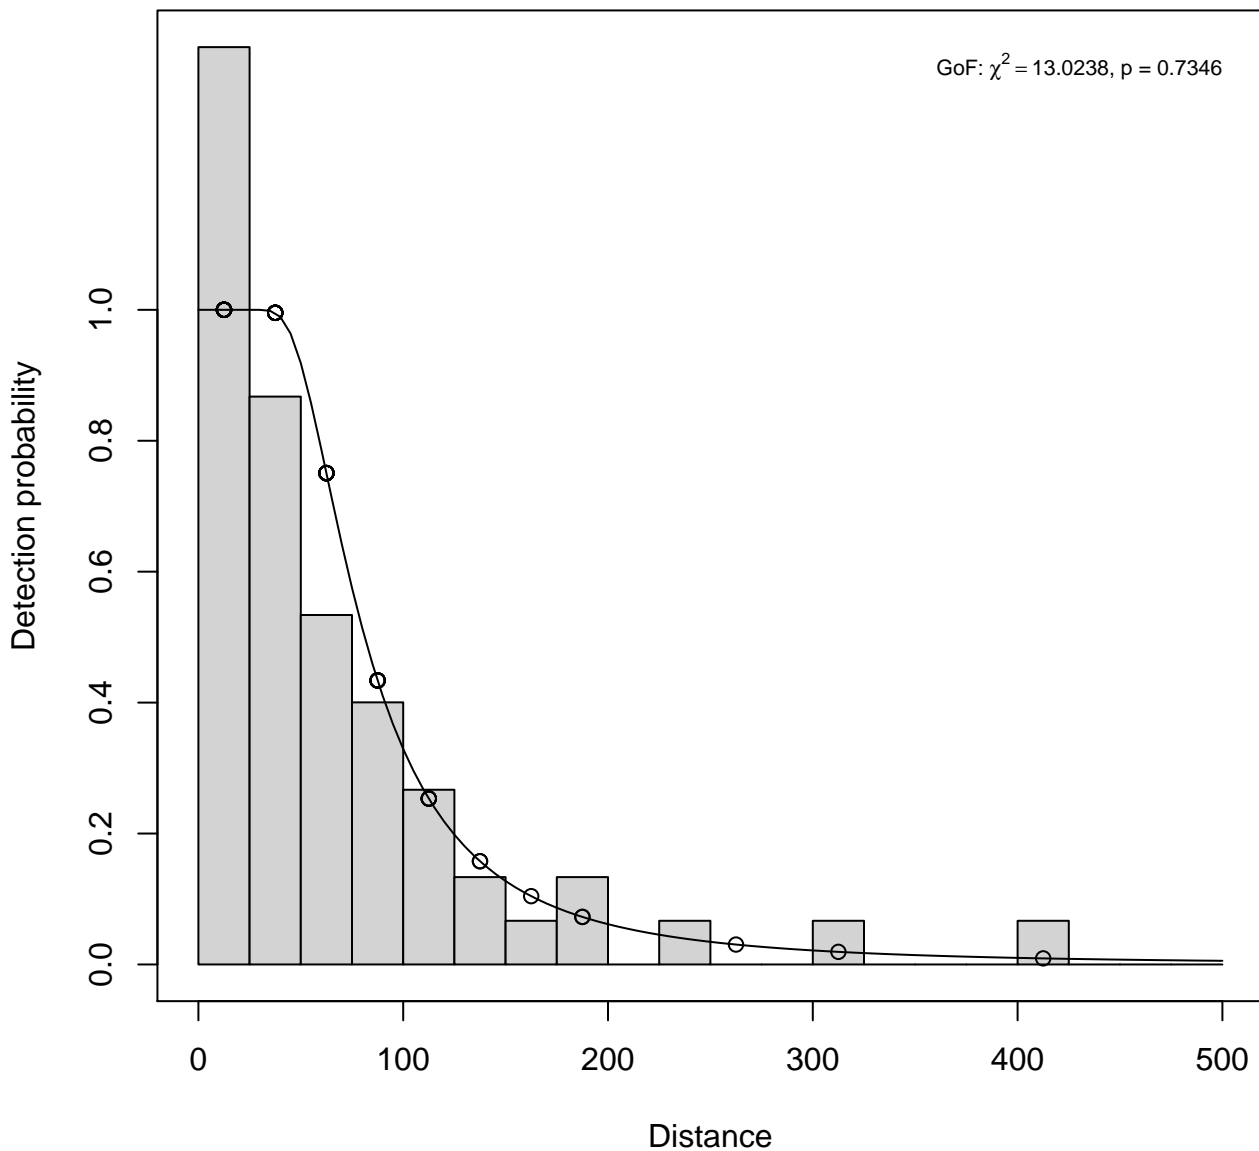

Brotogeris jugularis – Sinu Valley dry forests – Colombia (N = 60, key function = hr)

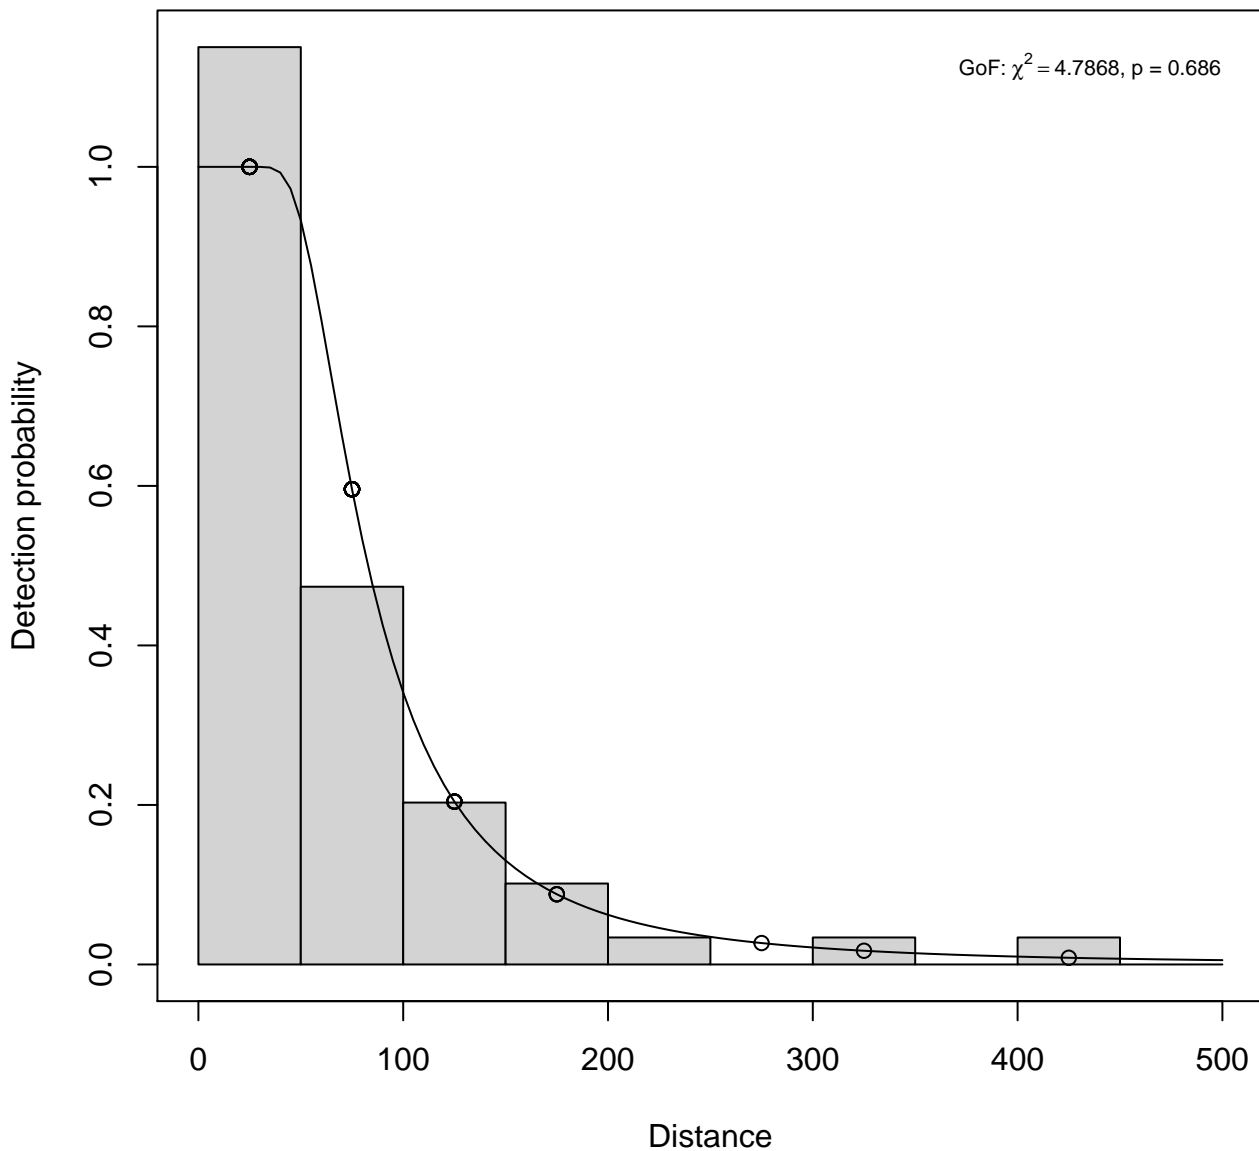

Brotogeris jugularis – Sinu Valley dry forests – Colombia (N = 60, key function = hr)

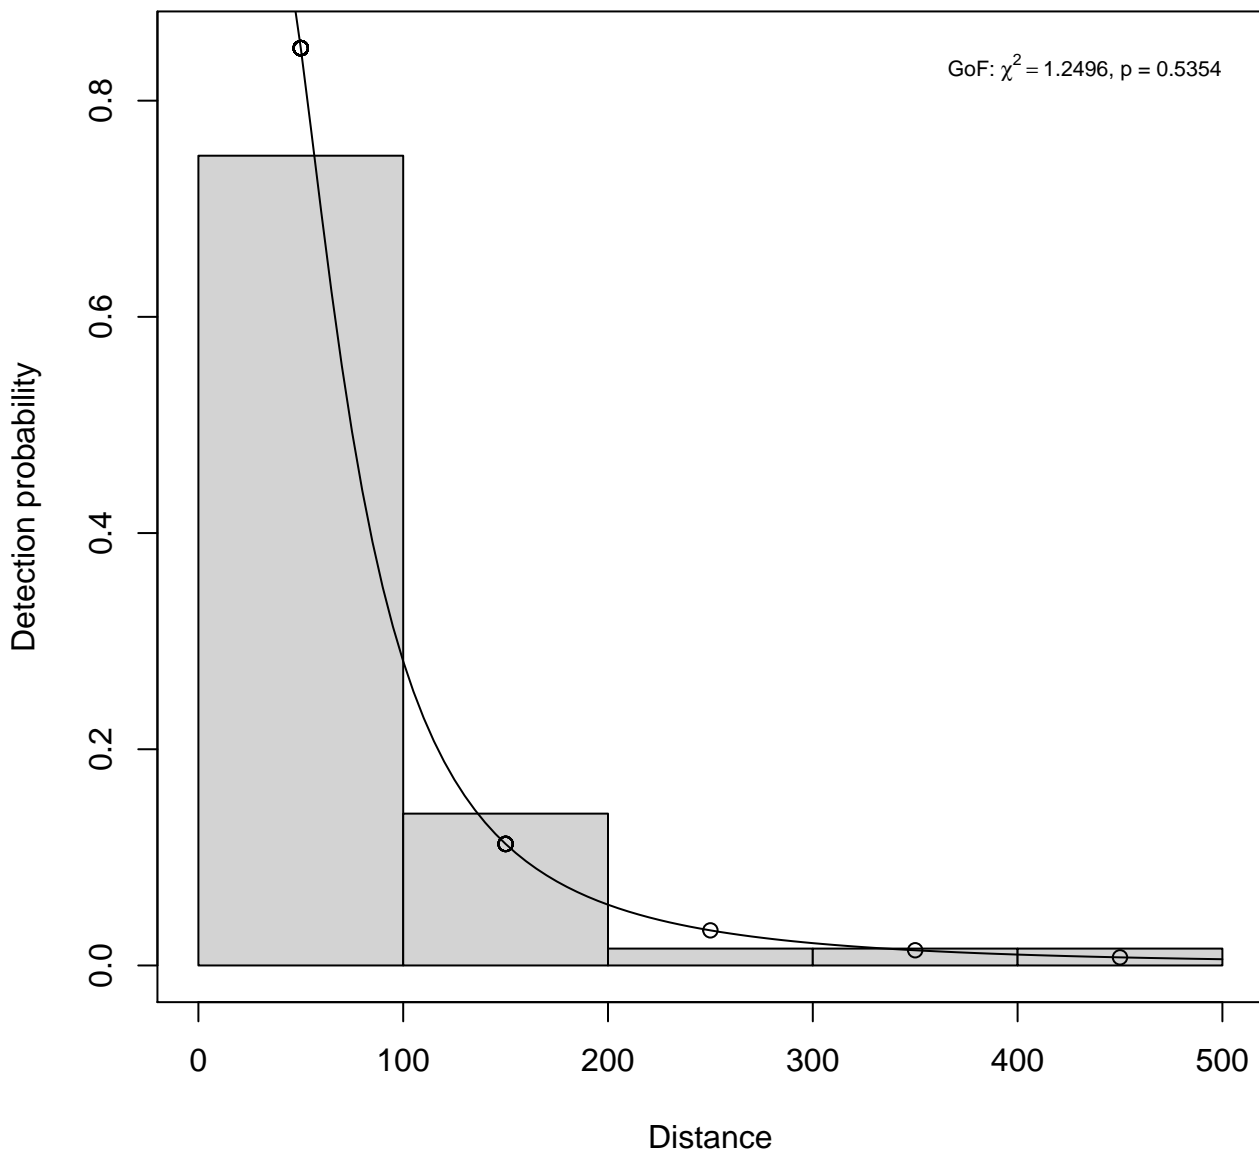

Supplement: s1 [file s1]
