# Supplementary material
Source: MDPI journal article supplement (https://www.mdpi.com/1424-2818/13/7/300)

# **Forpus xanthopterygius – Caatinga – Brazil**

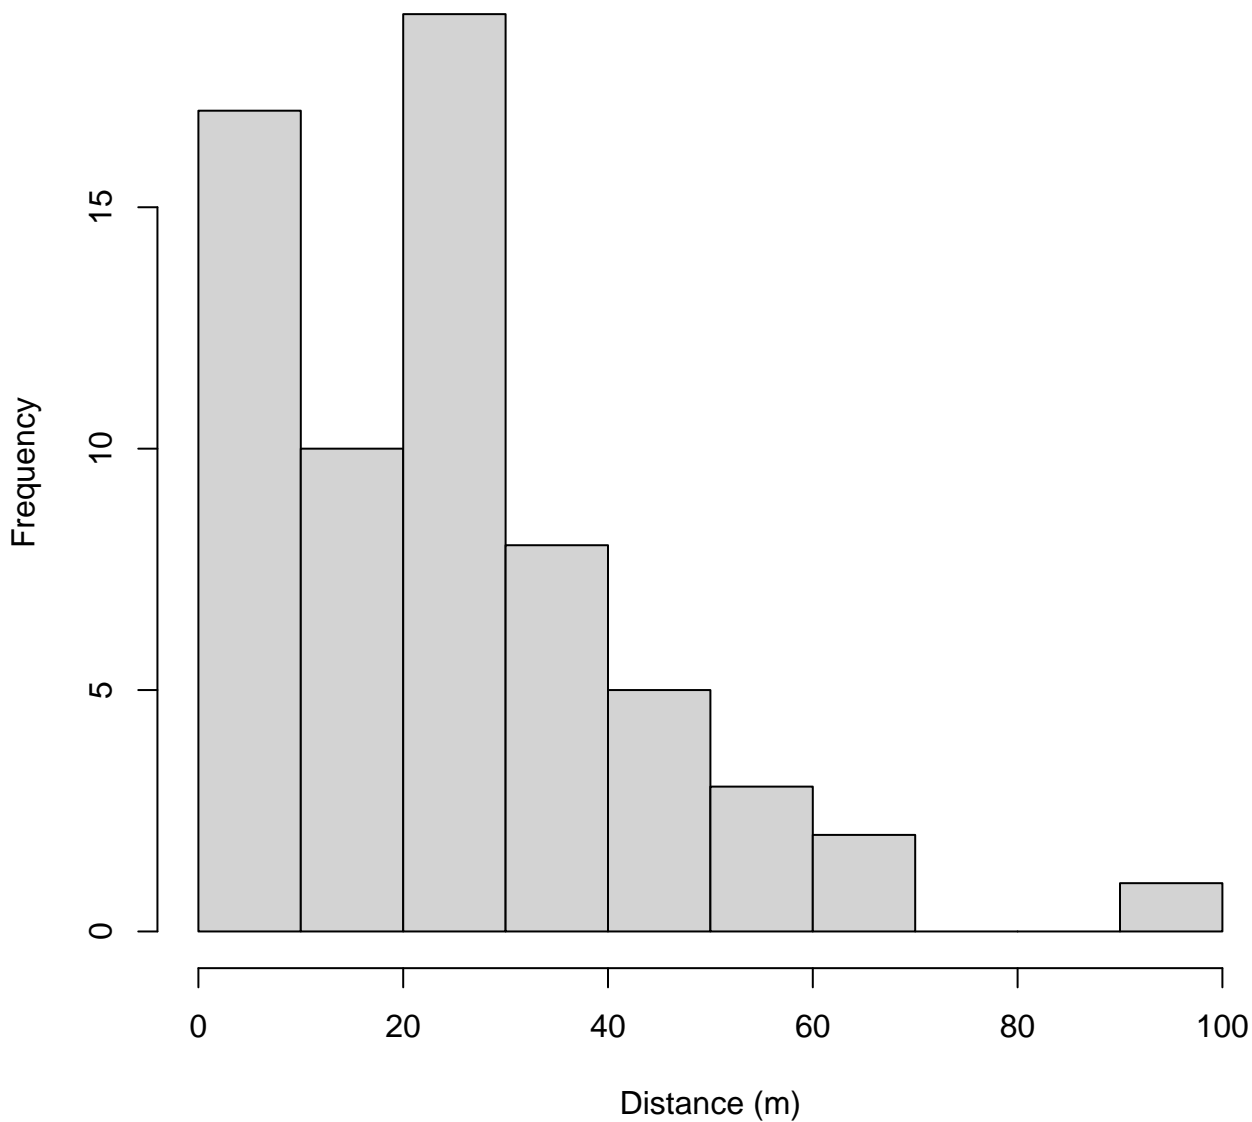

# Forpus xanthopterygius – Caatinga – Brazil

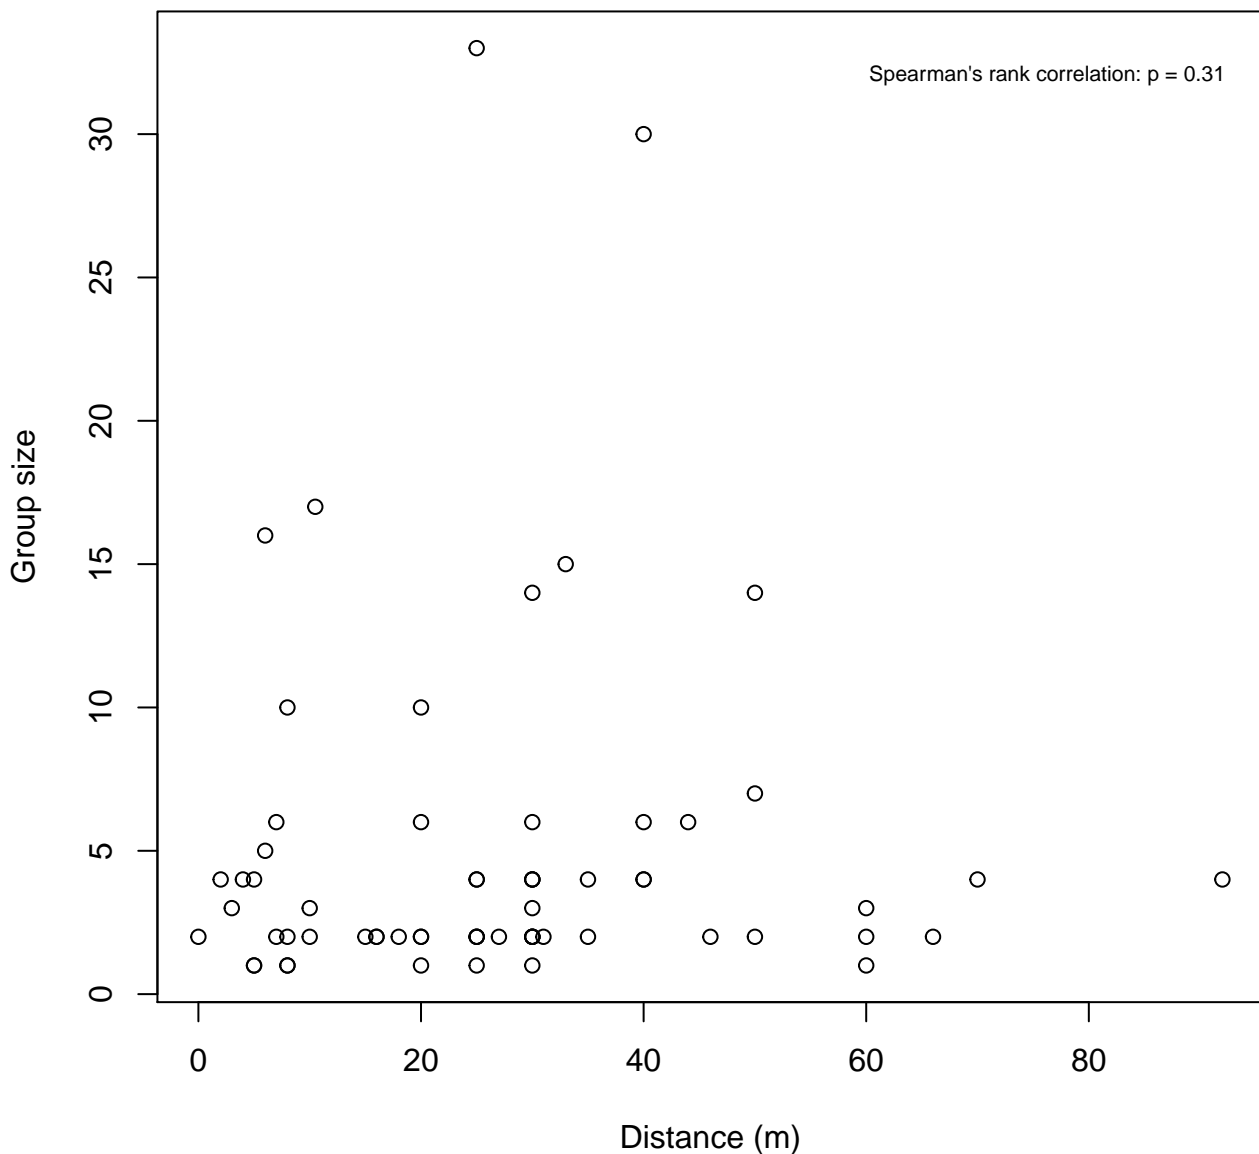

Forpus xanthopterygius – Caatinga – Brazil (N = 65, key function = hr)

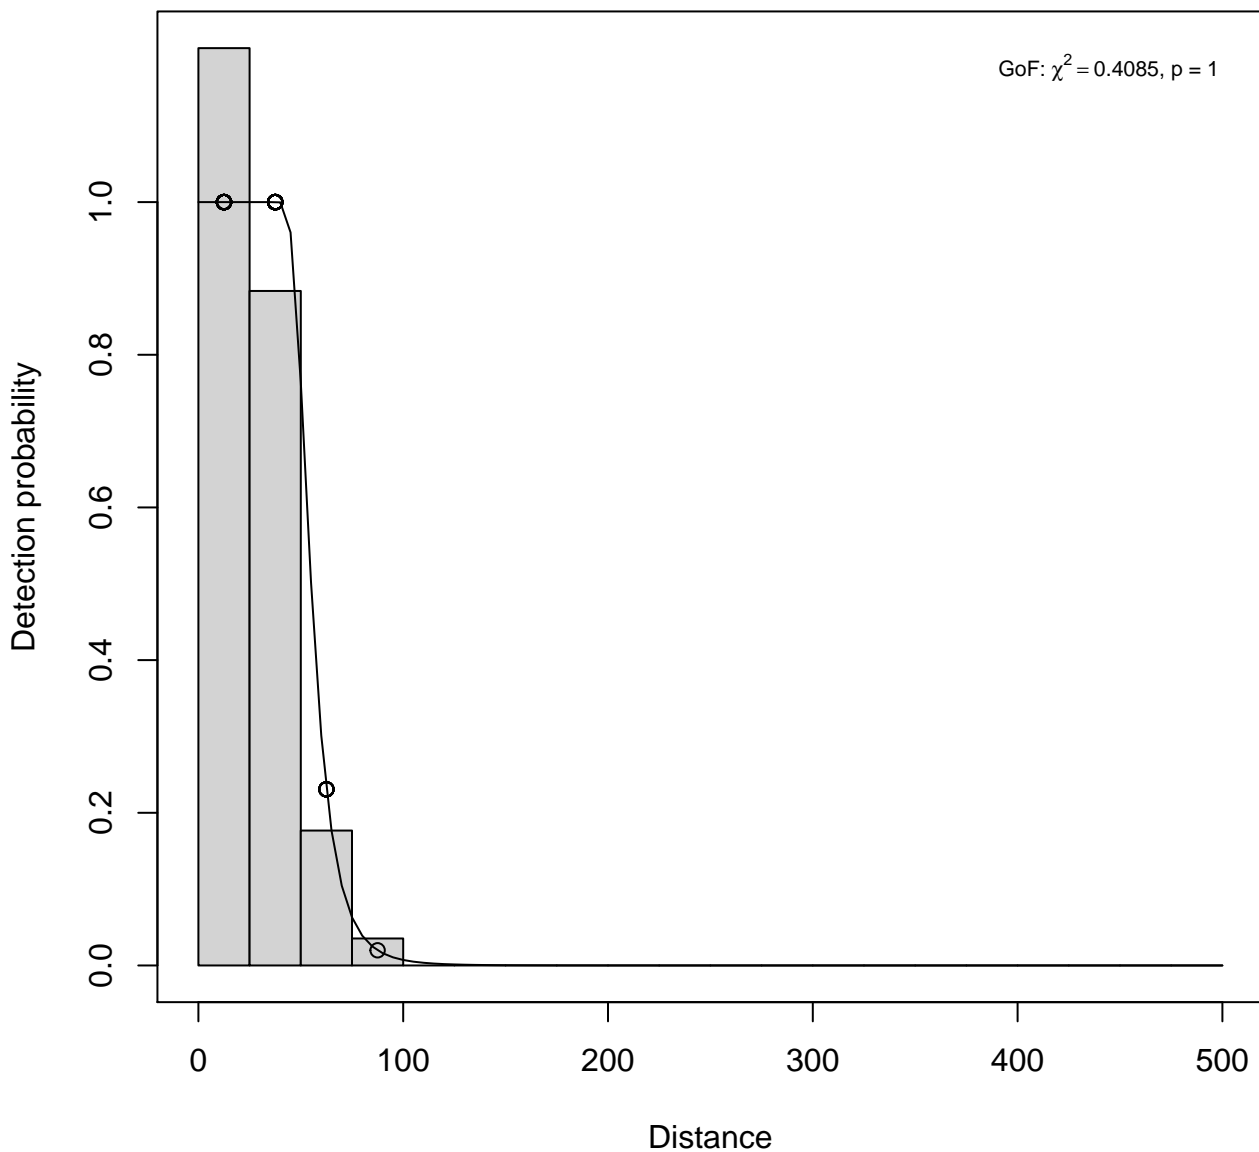

GoF:  $\chi^2 = \text{NA}$ , p = NA

Forpus xanthopterygius – Caatinga – Brazil (N = 65, key function = hn)

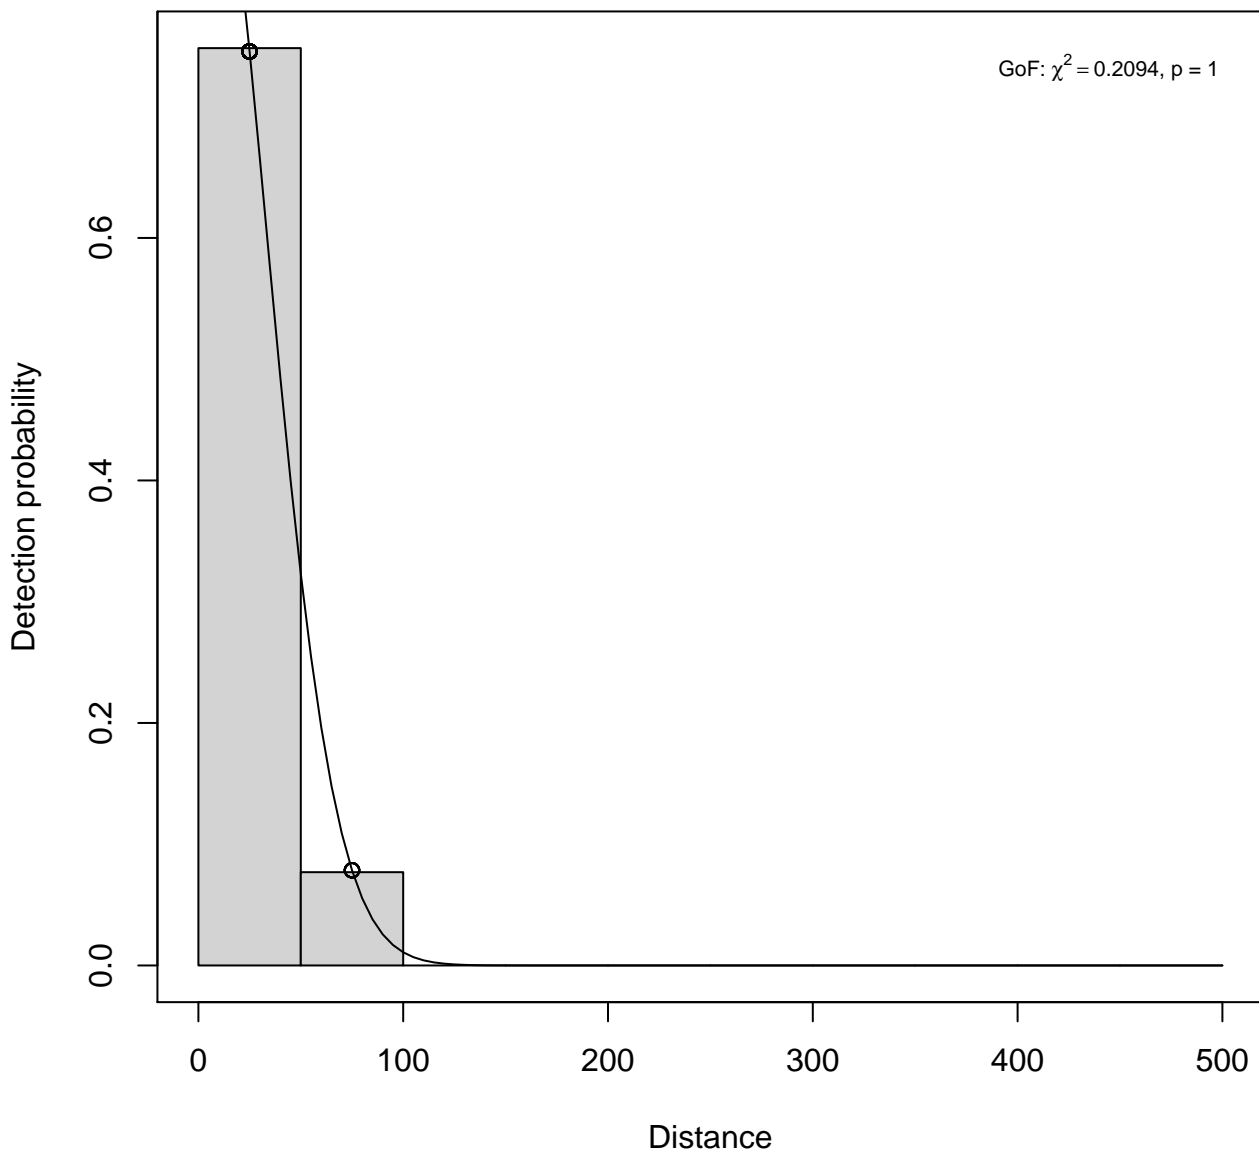

Supplement: s1 [file s1]
