# Supplementary material
Source: MDPI journal article supplement (https://www.mdpi.com/1424-2818/13/7/300)

**Trichoglossus haematodus – Cape York Peninsula tropical savanna – Austr**

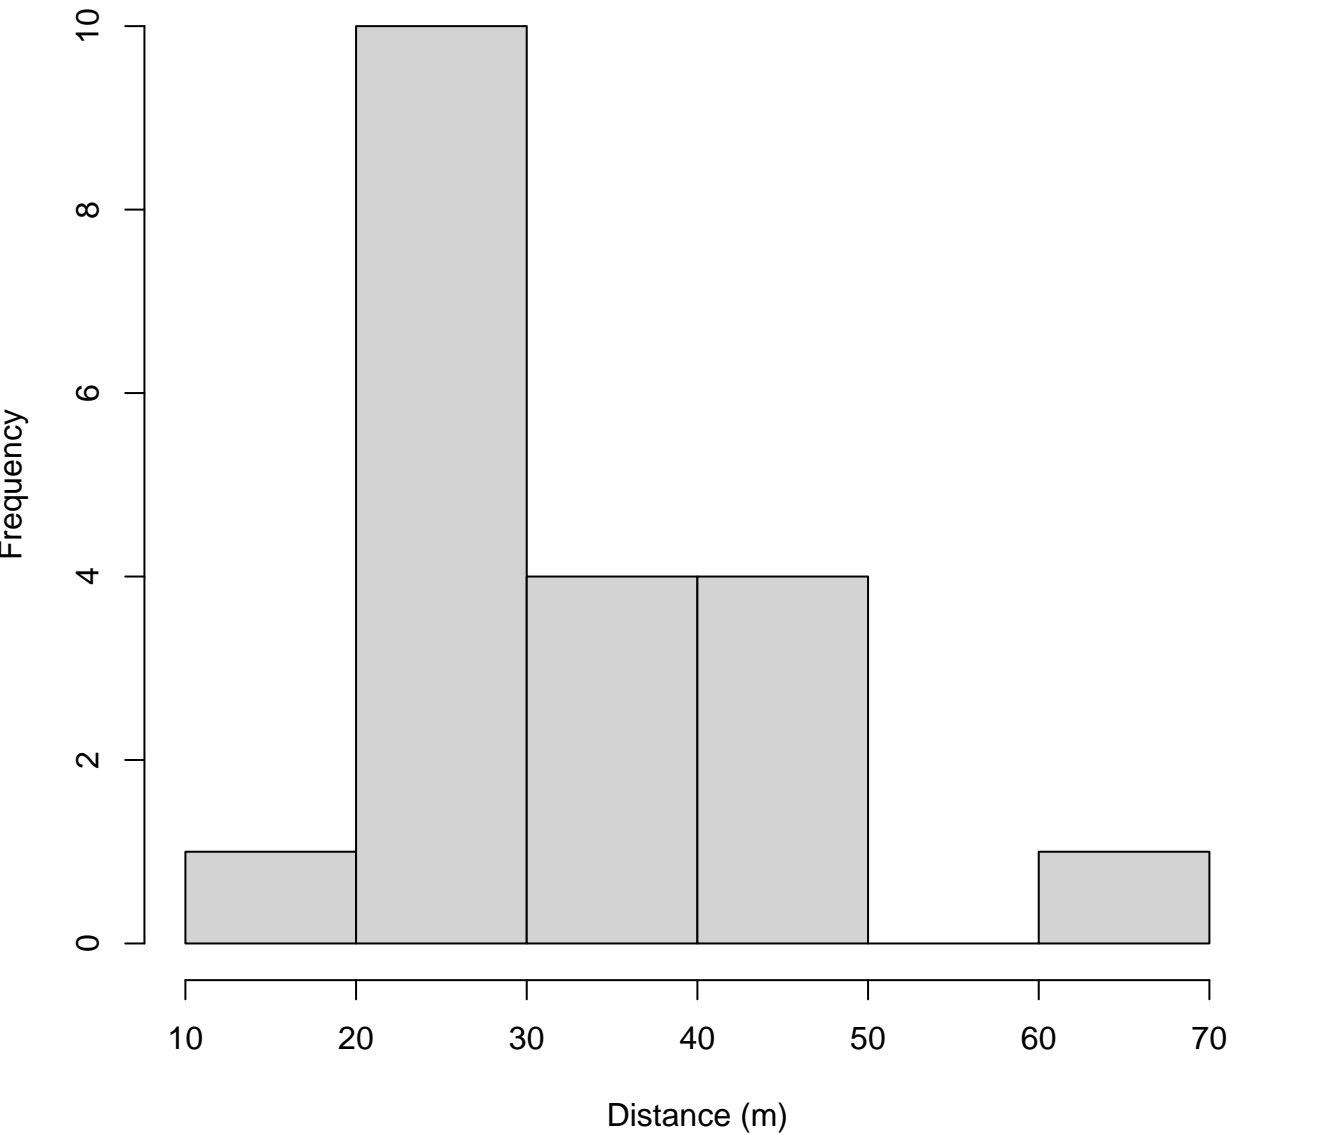

**Trichoglossus haematodus – Cape York Peninsula tropical savanna – Australia**

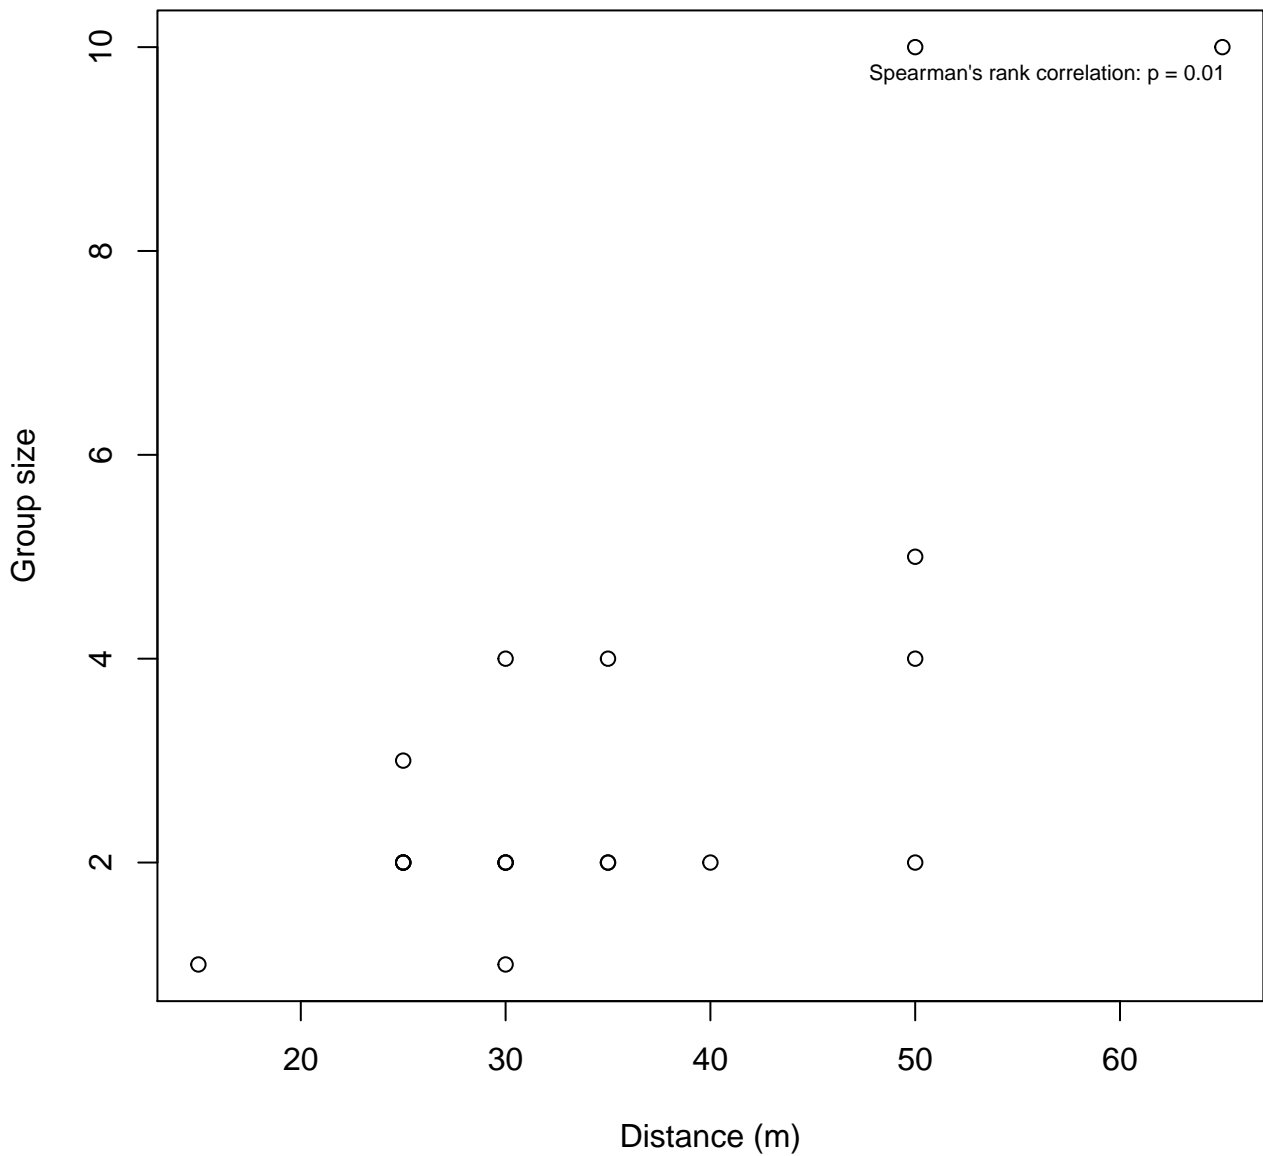

Trichoglossus haematodus – Cape York Peninsula tropical savanna – Australia (N = 20, key function = hn)

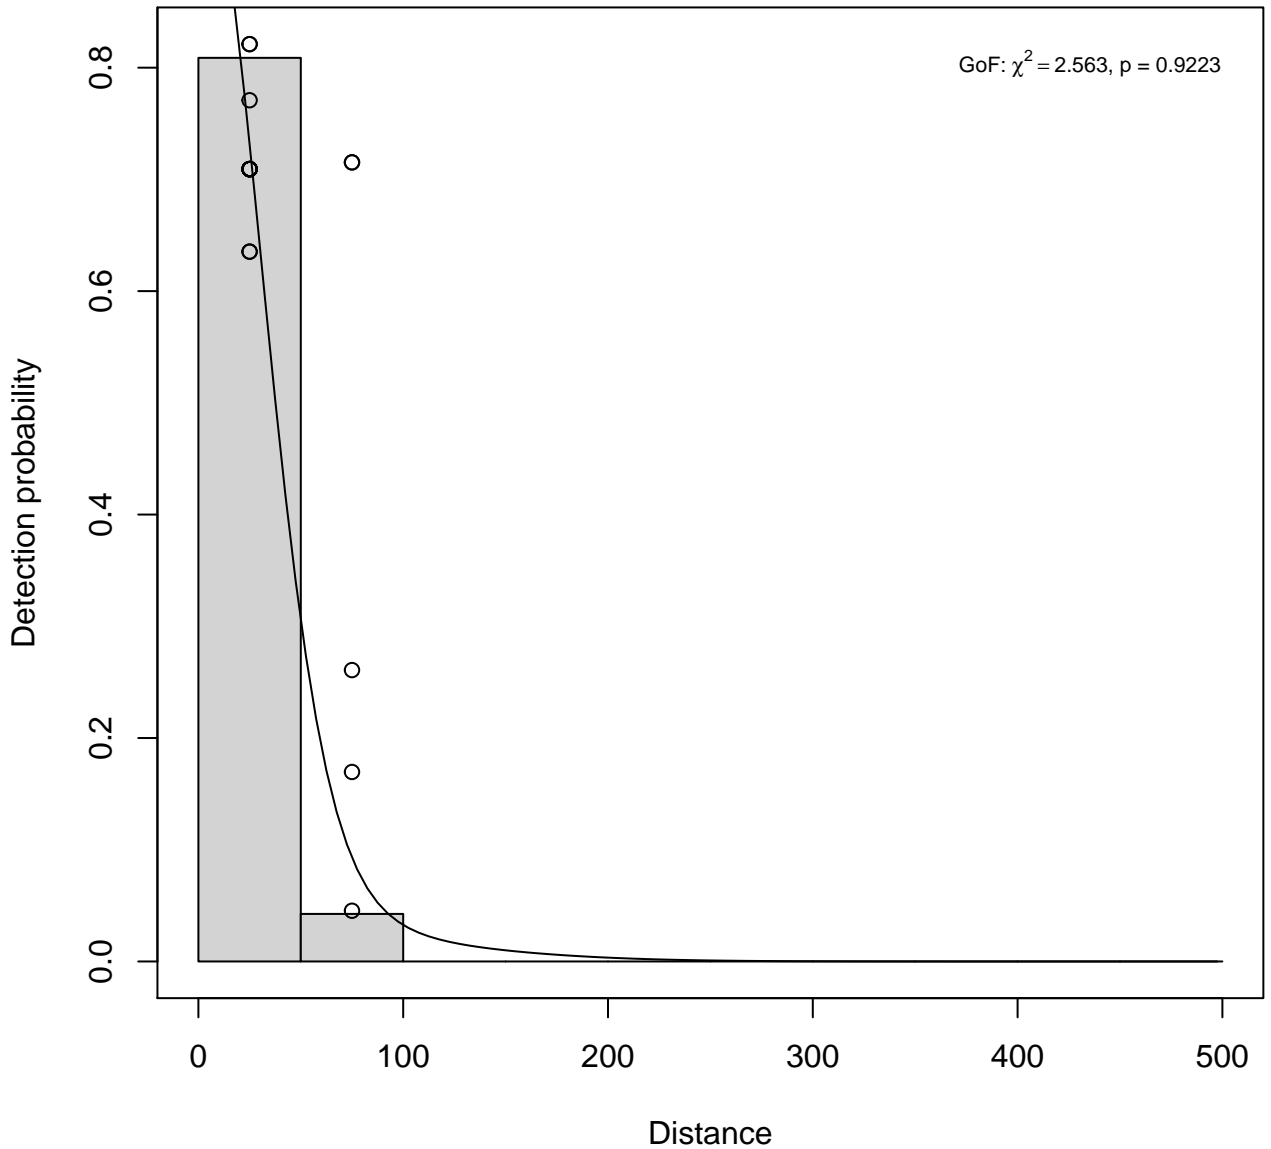

GoF:  $\chi^2 = \text{NA}$ , p = NA

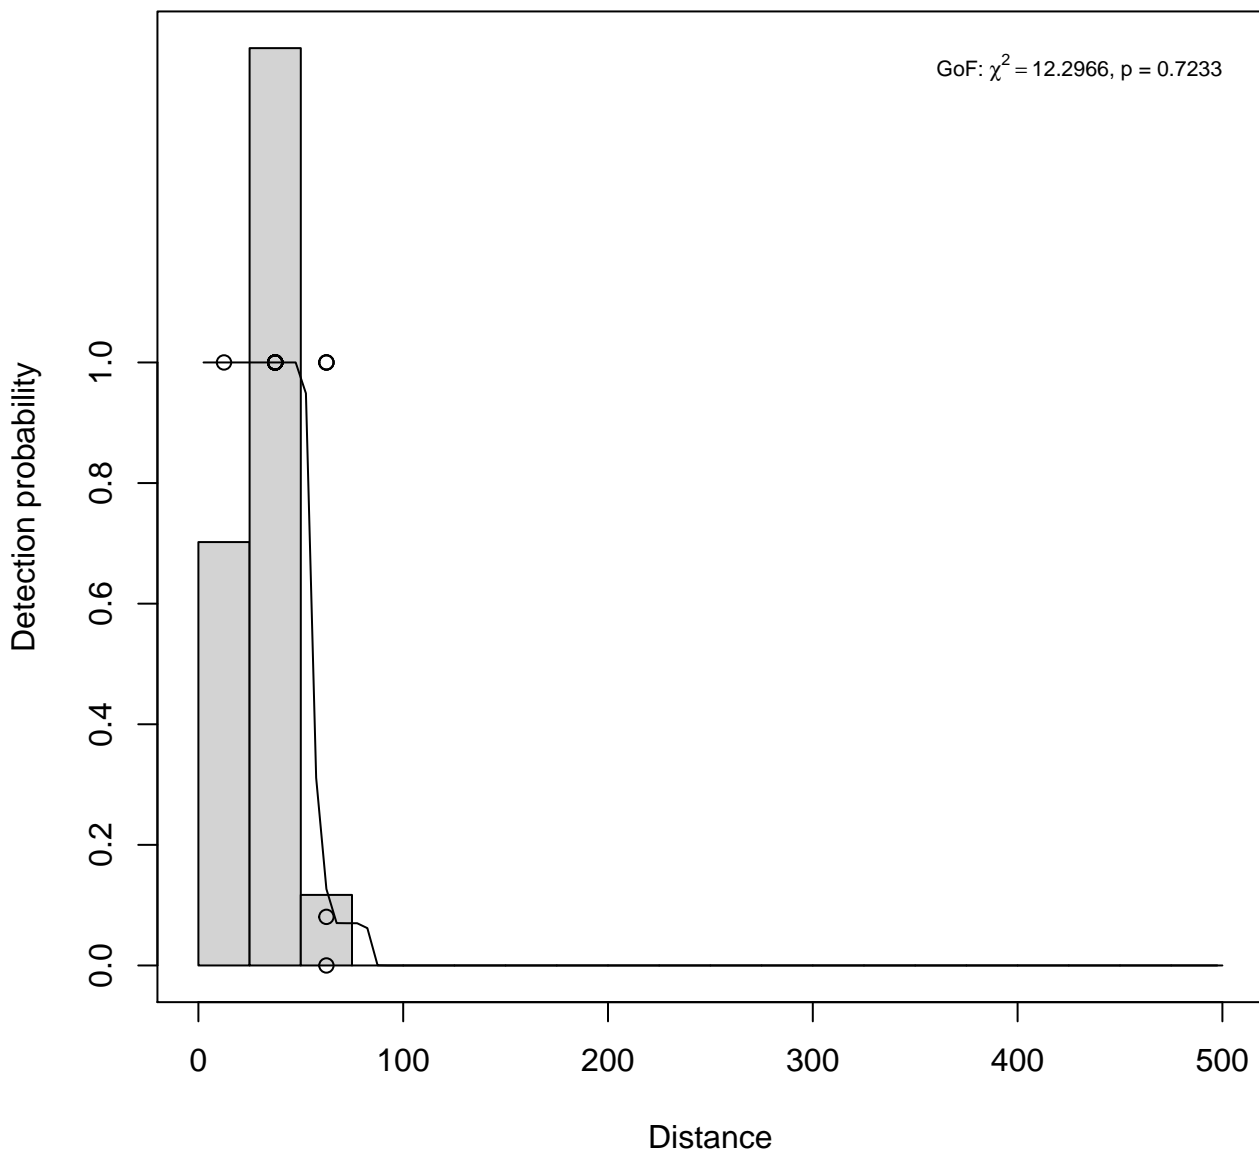

Supplement: s1 [file s1]
