# Supplementary material
Source: MDPI journal article supplement (https://www.mdpi.com/1424-2818/13/7/300)

# **Amazona farinosa – Isthmian–Atlantic moist forests – Panama**

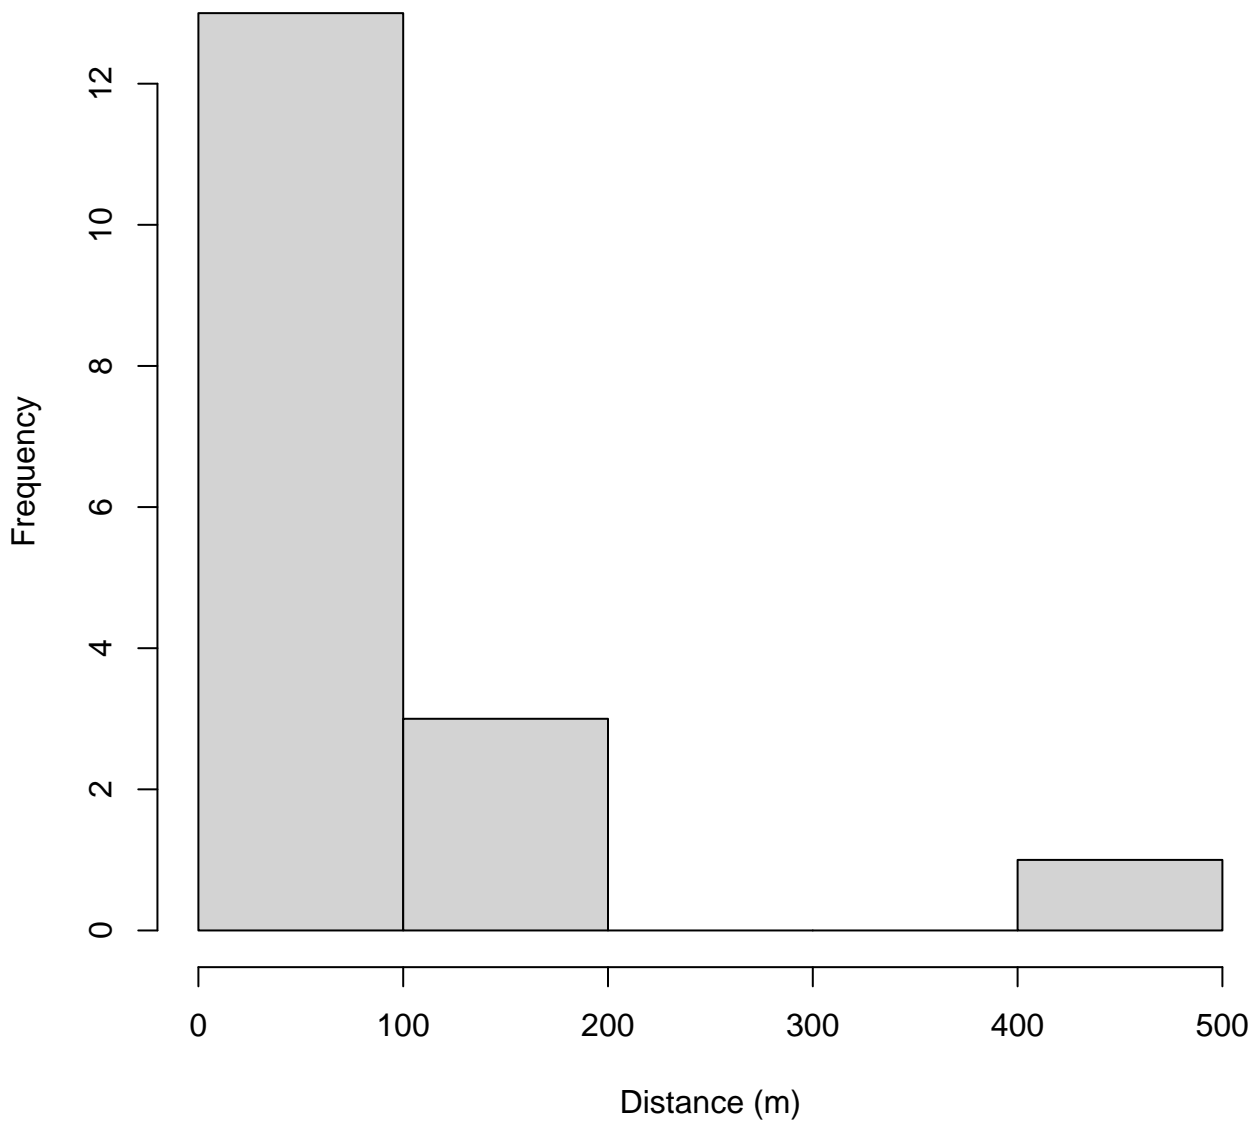

# Amazona farinosa – Isthmian–Atlantic moist forests – Panama

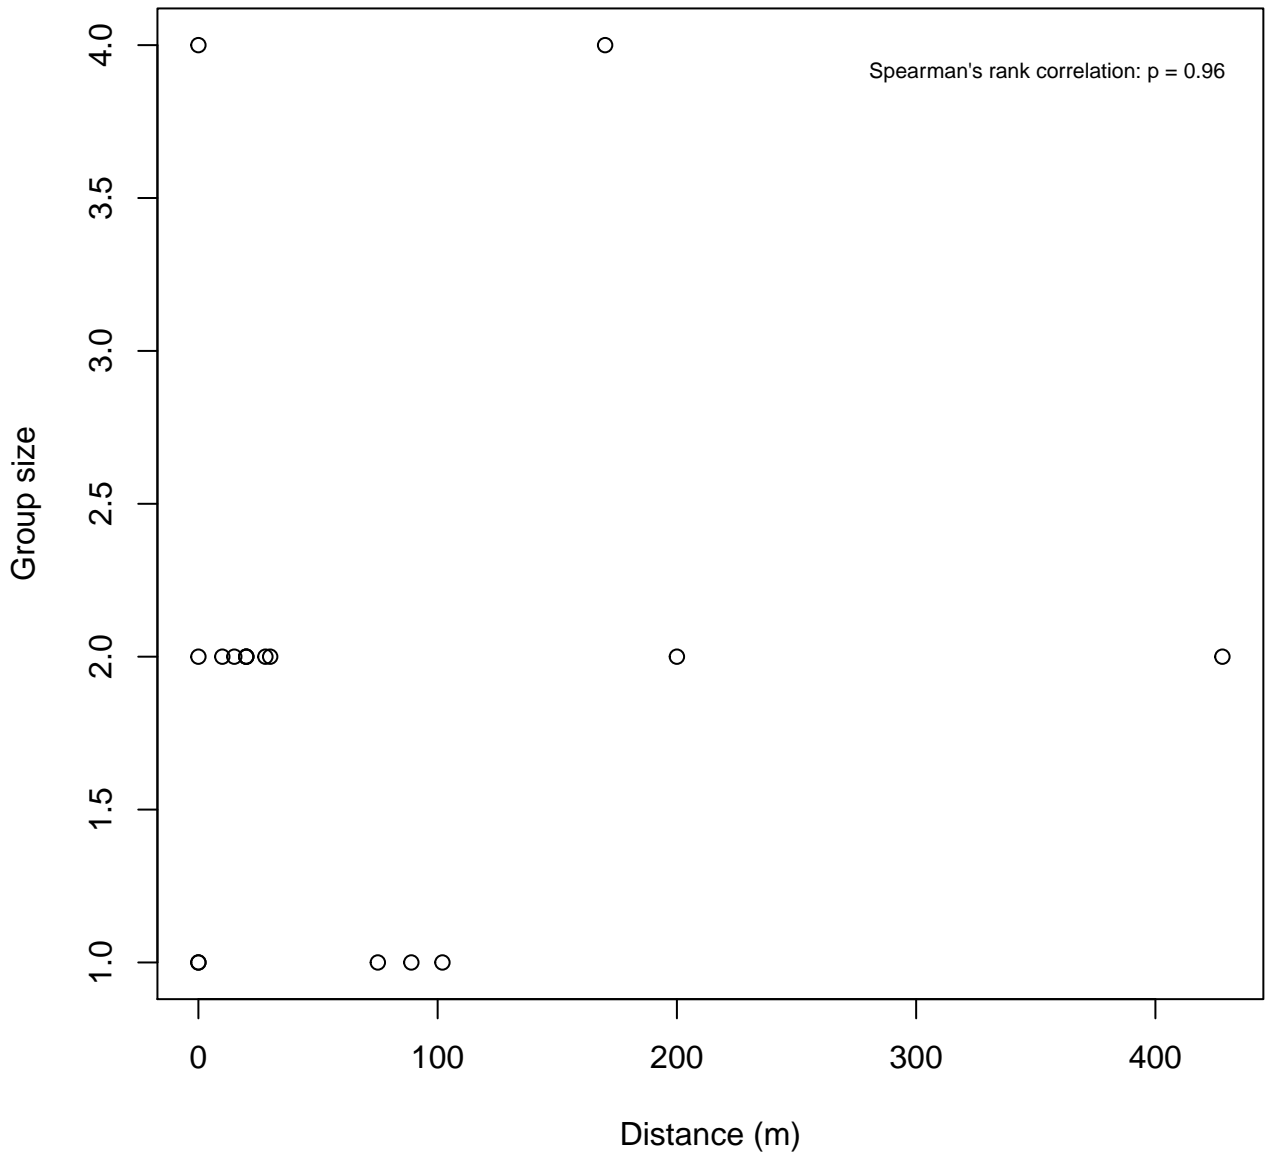

Amazona farinosa – Isthmian–Atlantic moist forests – Panama (N = 17, key function = hr)

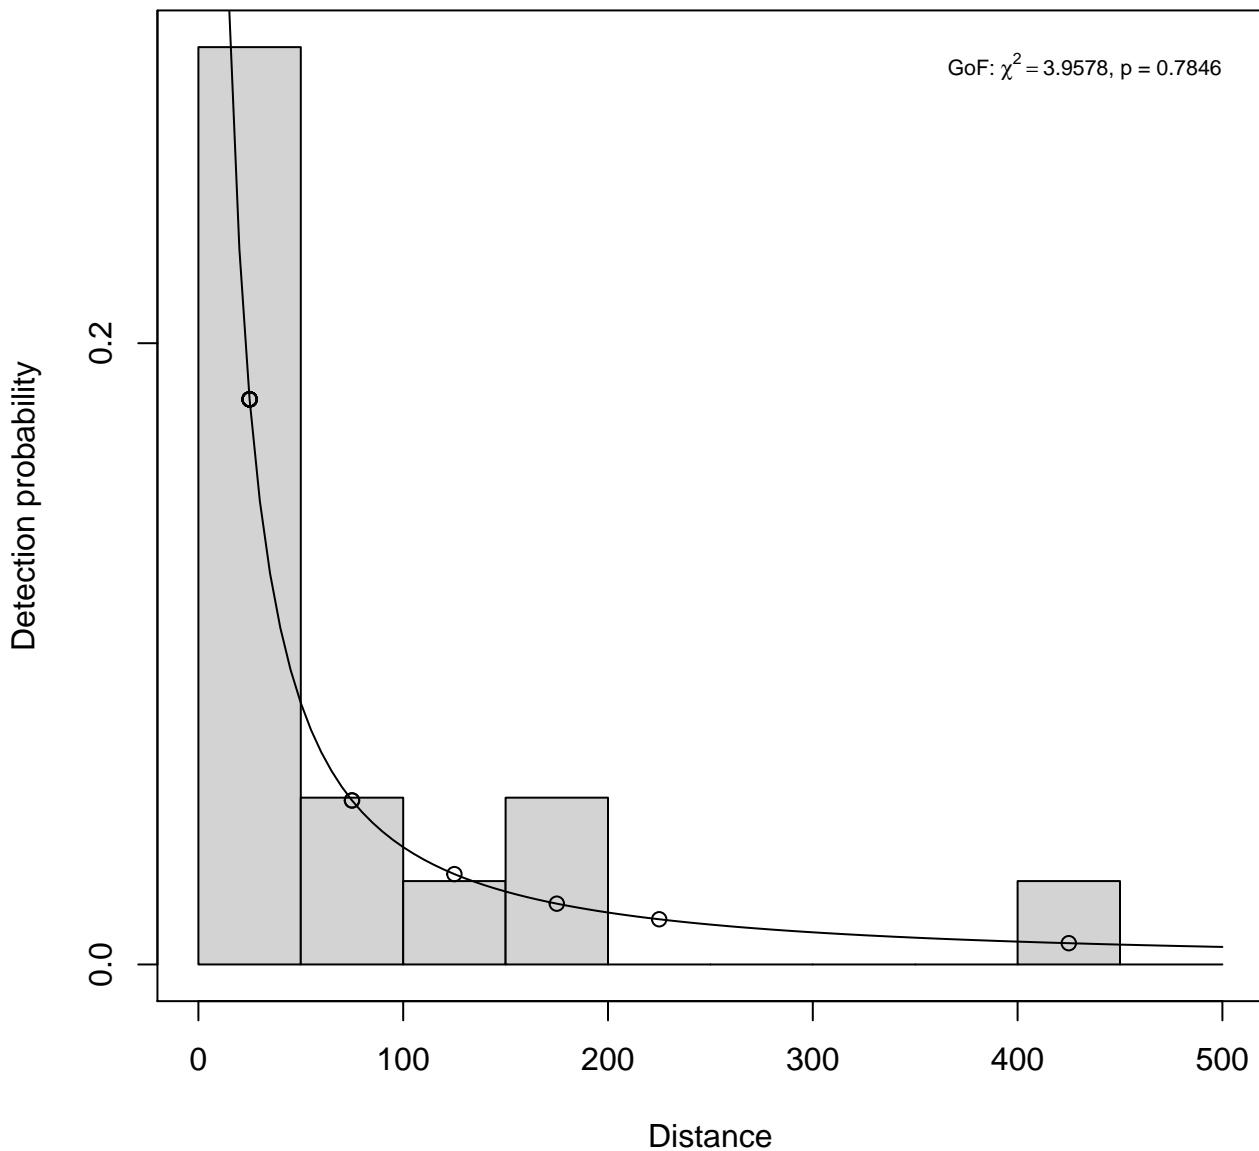

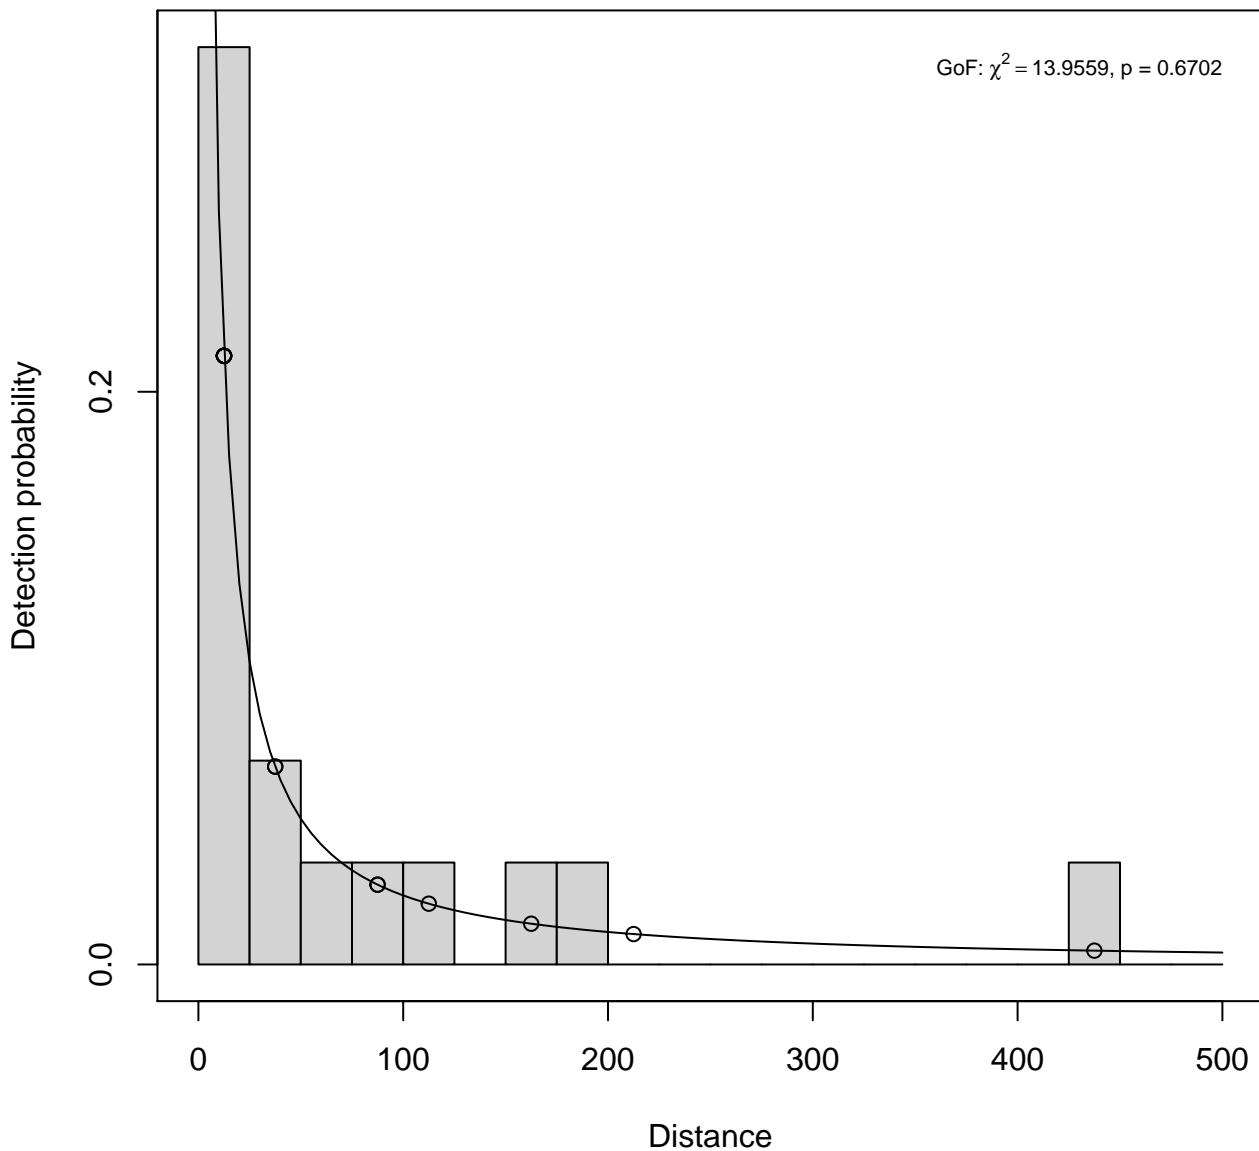

Amazona farinosa – Isthmian–Atlantic moist forests – Panama (N = 17, key function = hr)

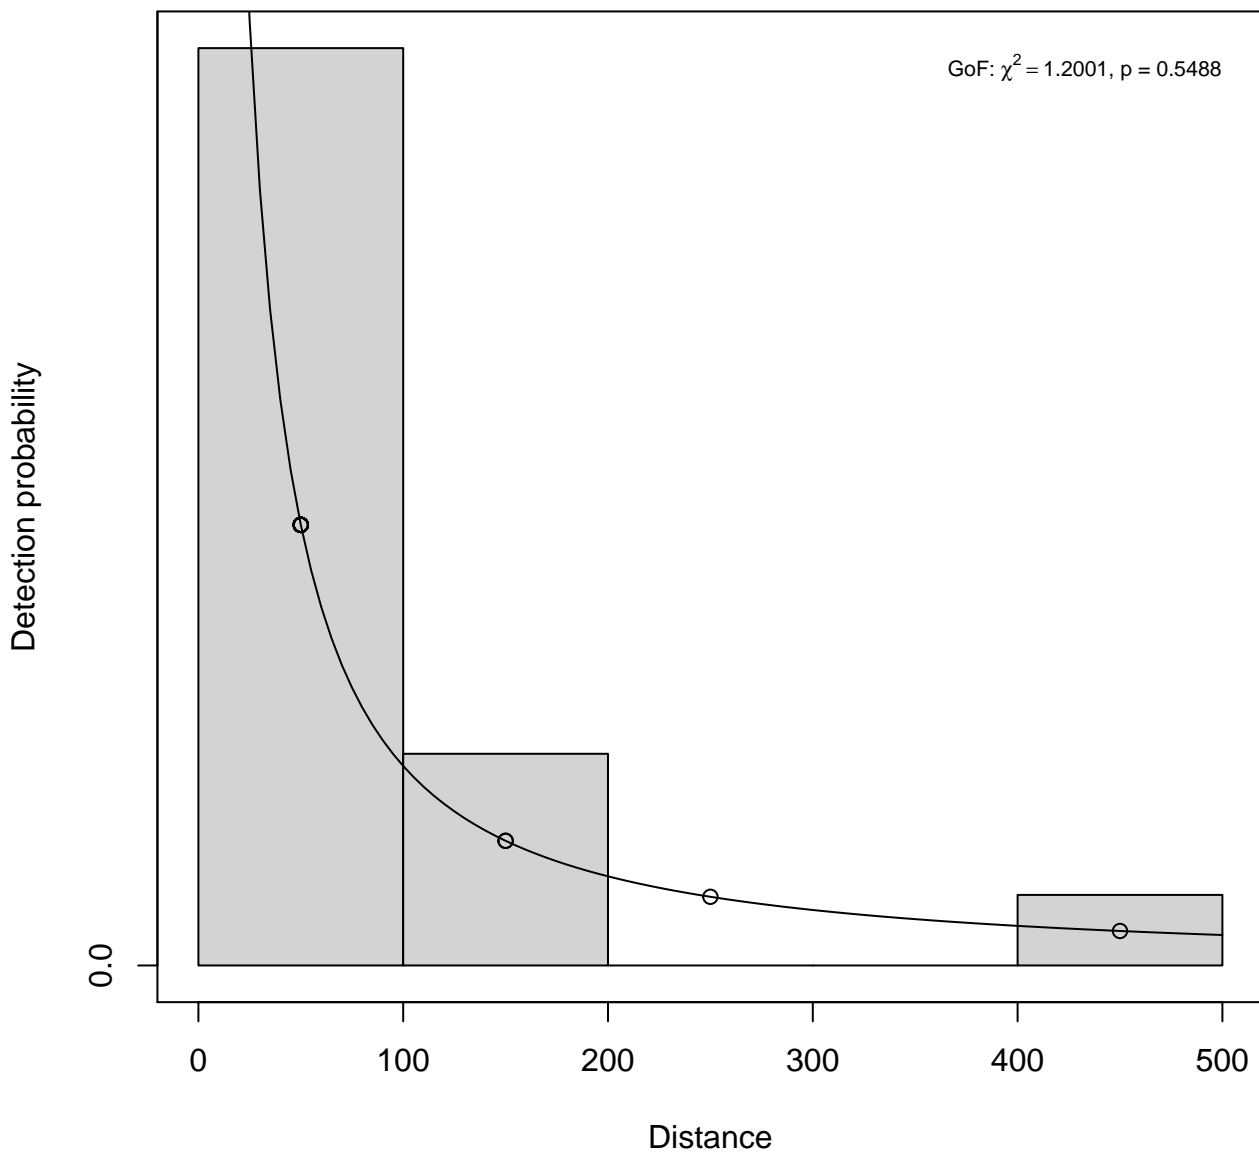

Supplement: s1 [file s1]
