# Supplementary material
Source: MDPI journal article supplement (https://www.mdpi.com/1424-2818/13/7/300)

# Psittacara leucophthalmus – Cerrado – Brazil

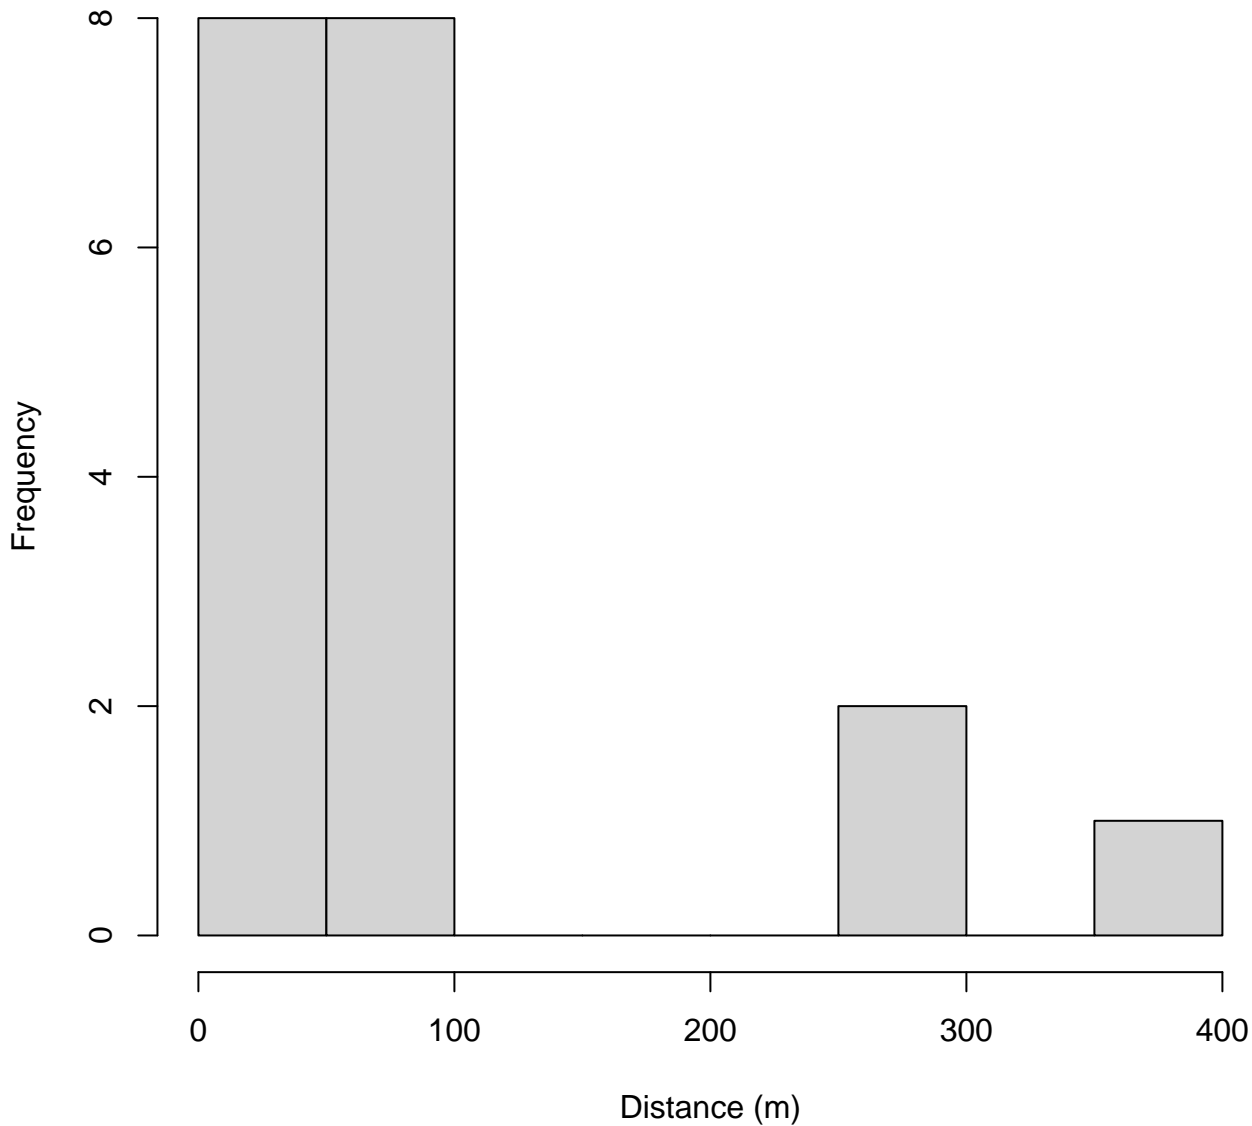

# Psittacara leucophthalmus – Cerrado – Brazil

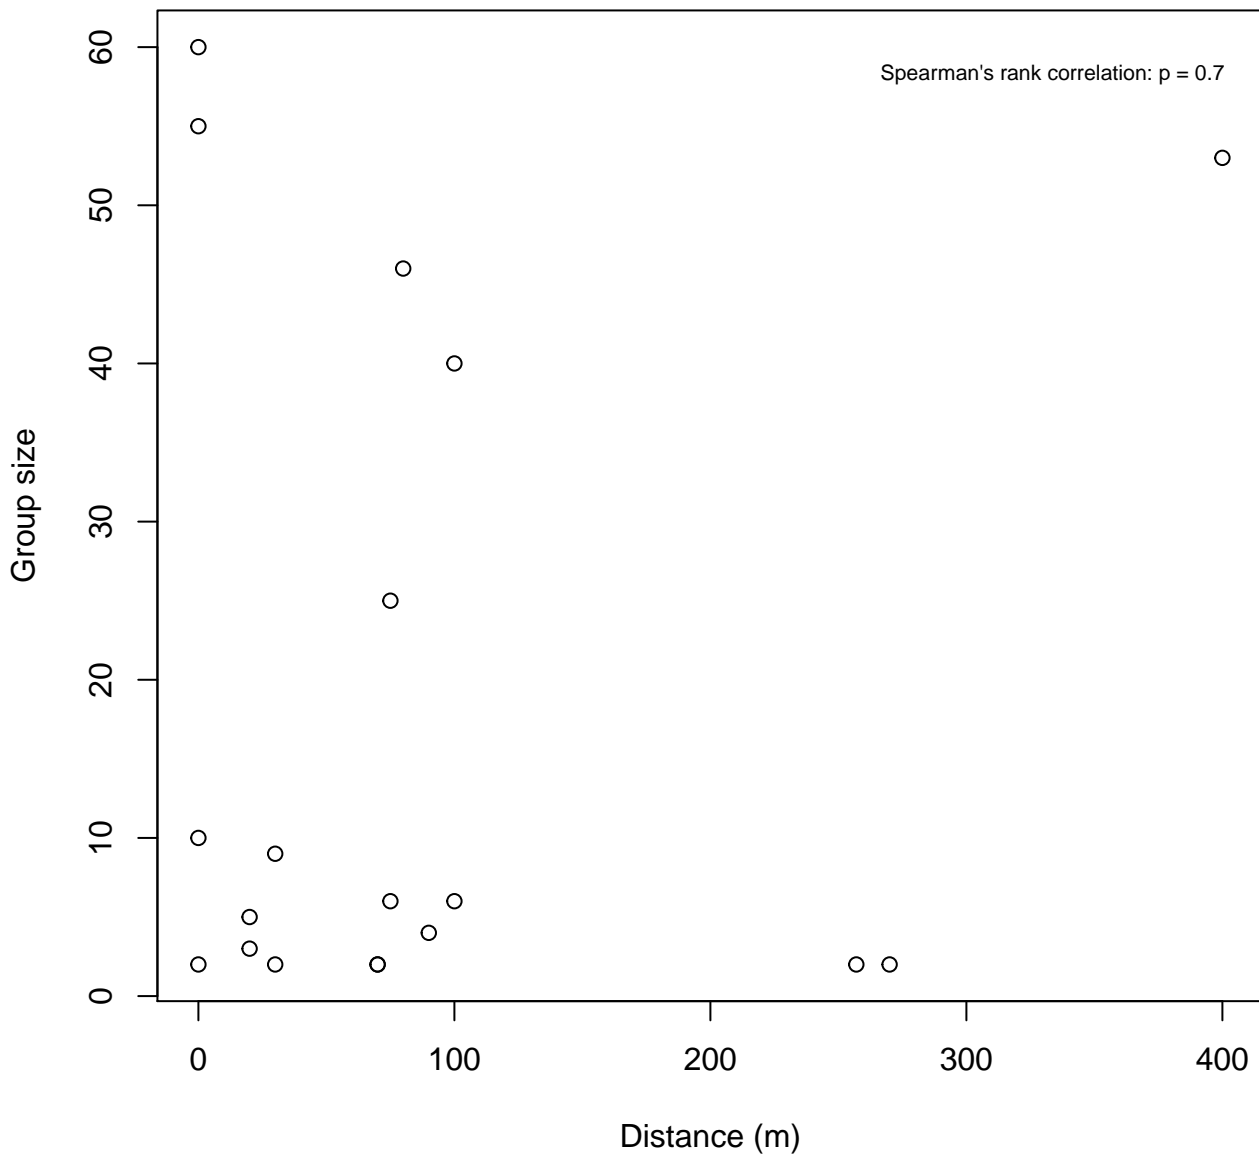

Psittacara leucophthalmus – Cerrado – Brazil (N = 19, key function = hr)

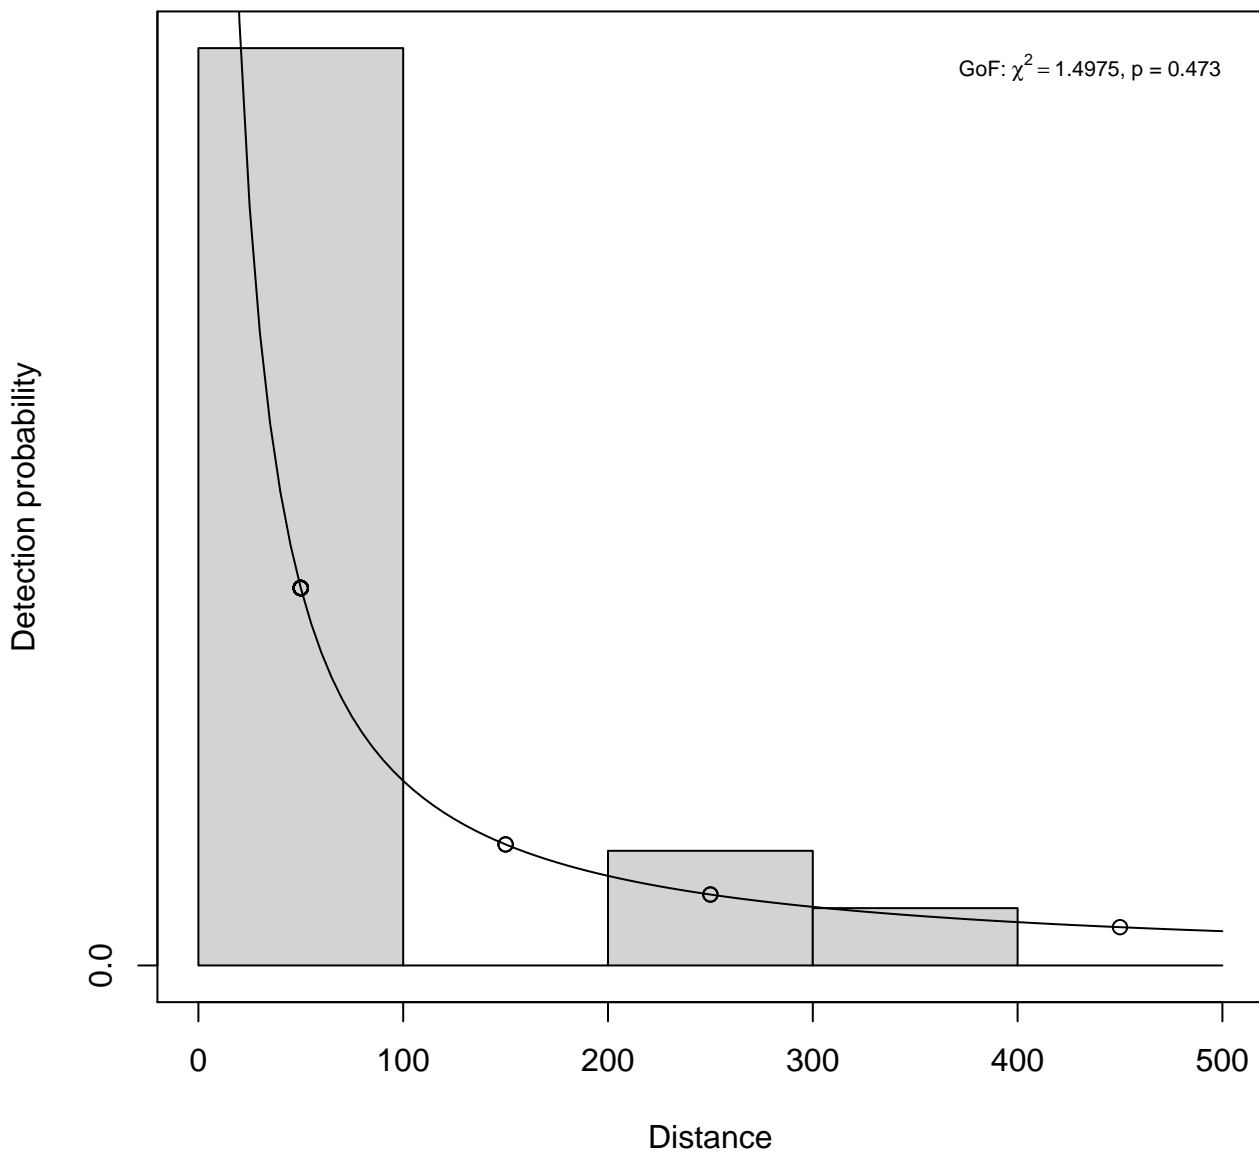

Psittacara leucophthalmus – Cerrado – Brazil (N = 19, key function = hr)

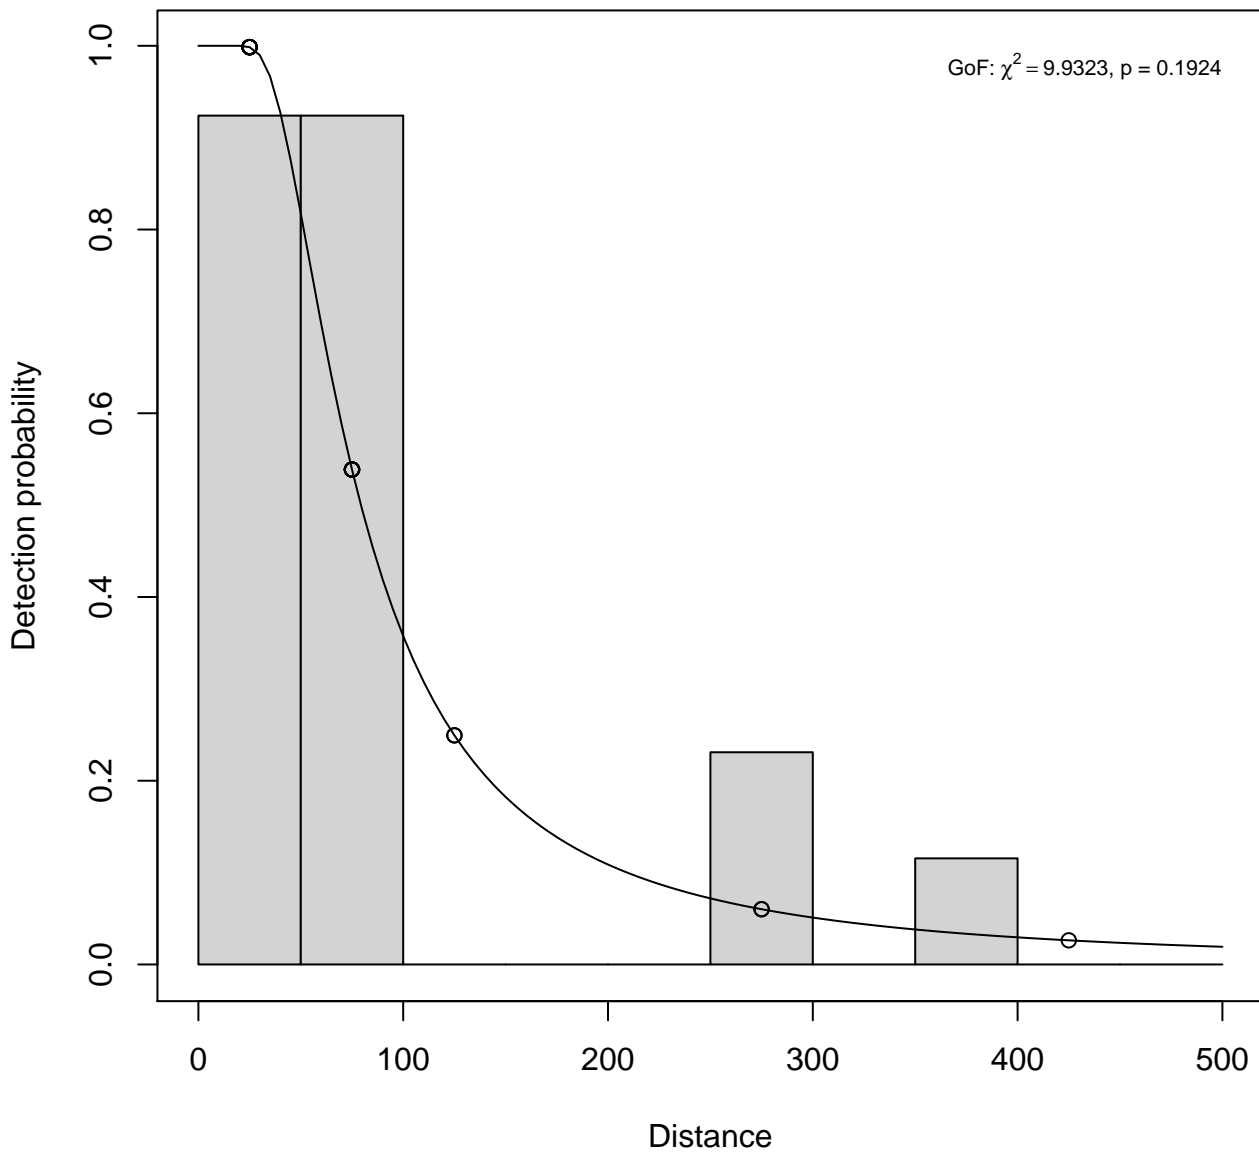

Psittacara leucophthalmus – Cerrado – Brazil (N = 19, key function = hr)

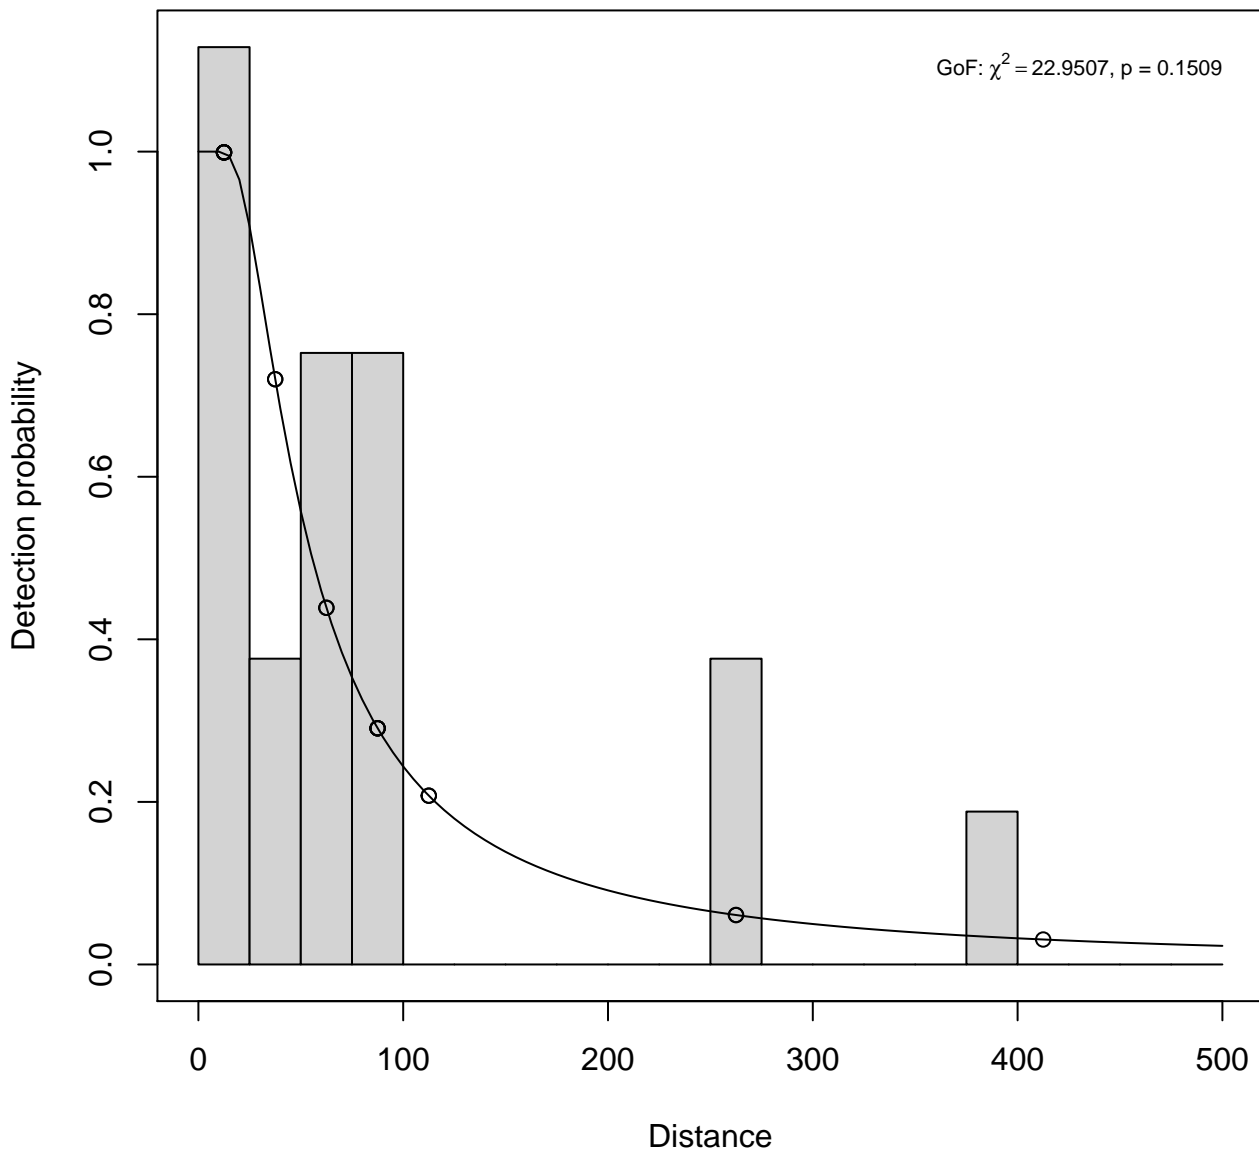

Supplement: s1 [file s1]
