# Supplementary material
Source: MDPI journal article supplement (https://www.mdpi.com/1424-2818/13/7/300)

# ***Thectocercus acuticaudatus* – Cerrado – Brazil**

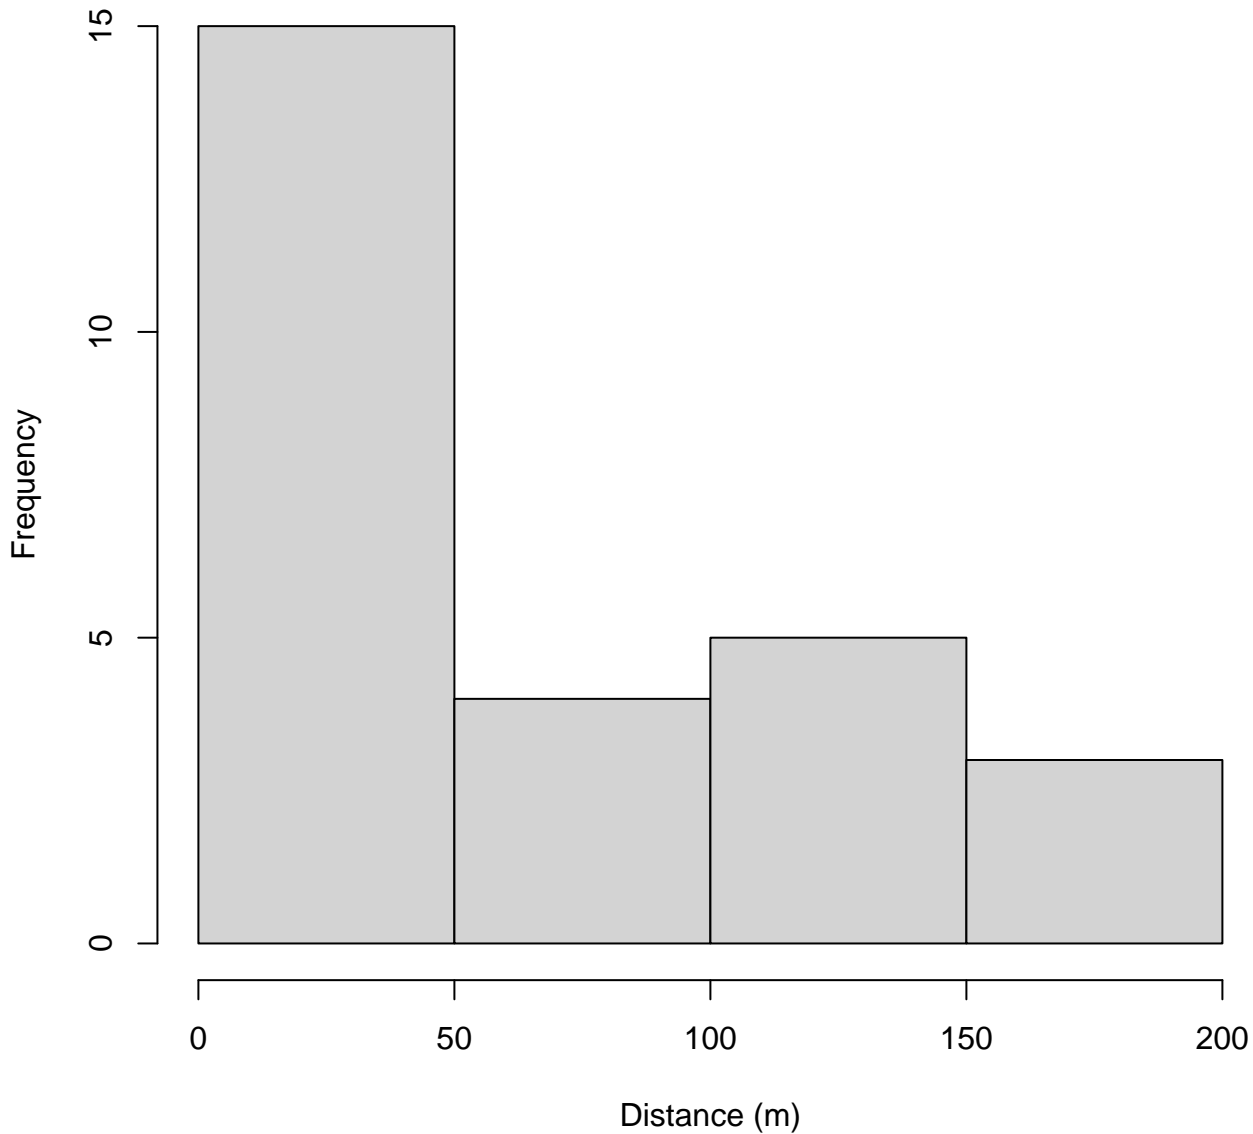

# **Thectocercus acuticaudatus – Cerrado – Brazil**

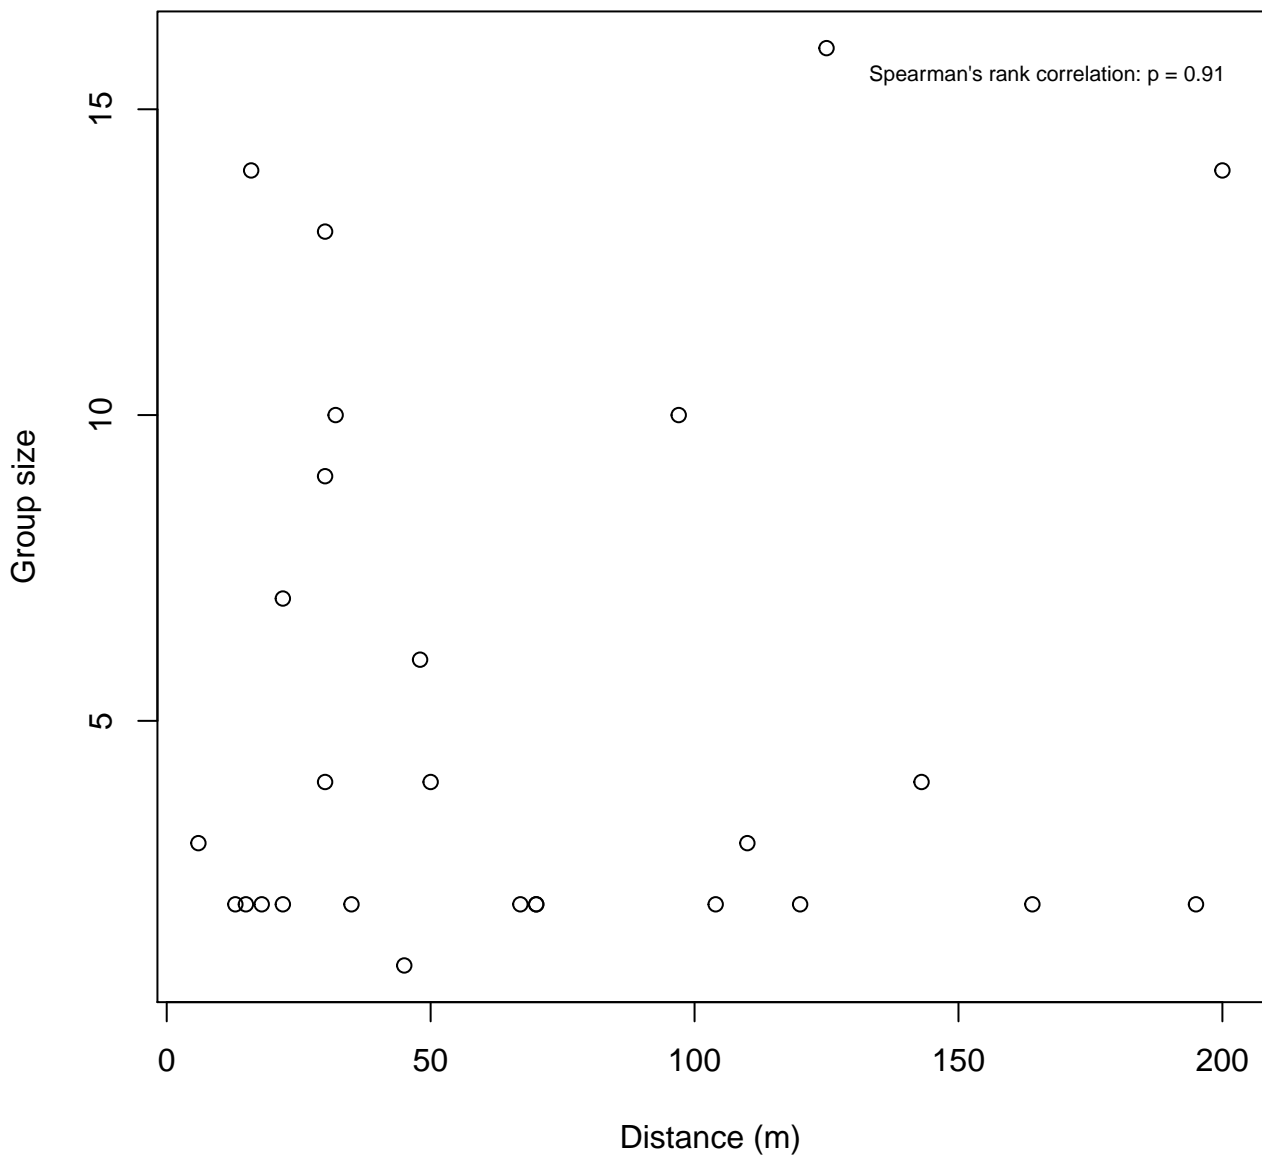

*Thectocercus acuticaudatus* – Cerrado – Brazil (N = 27, key function = hn)

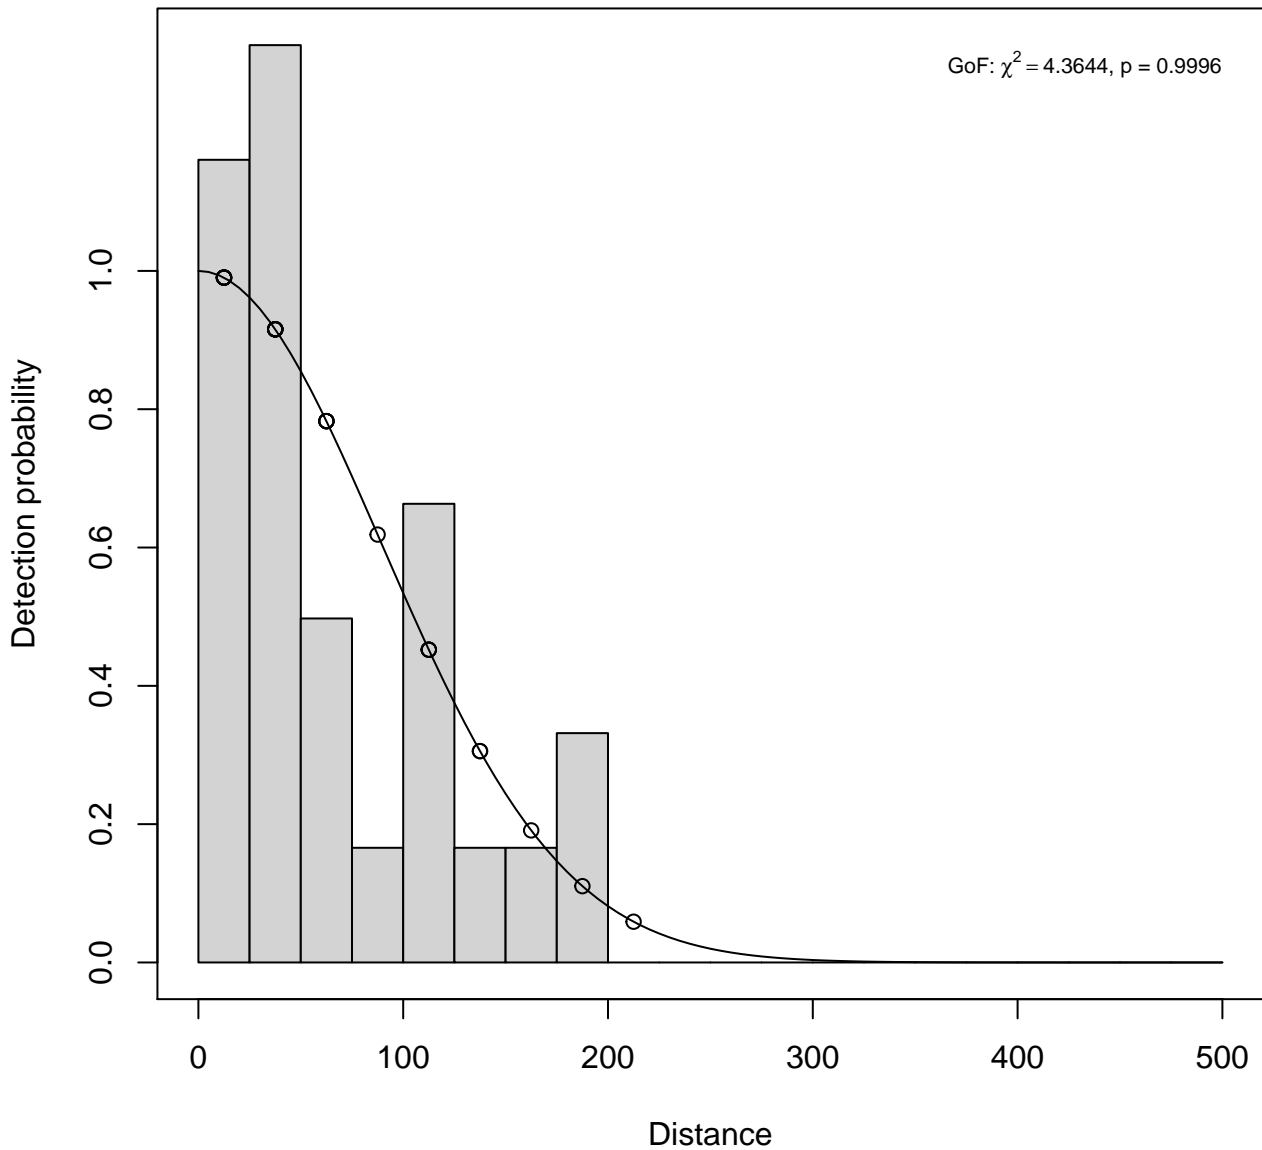

*Thectocercus acuticaudatus* – Cerrado – Brazil (N = 27, key function = hn)

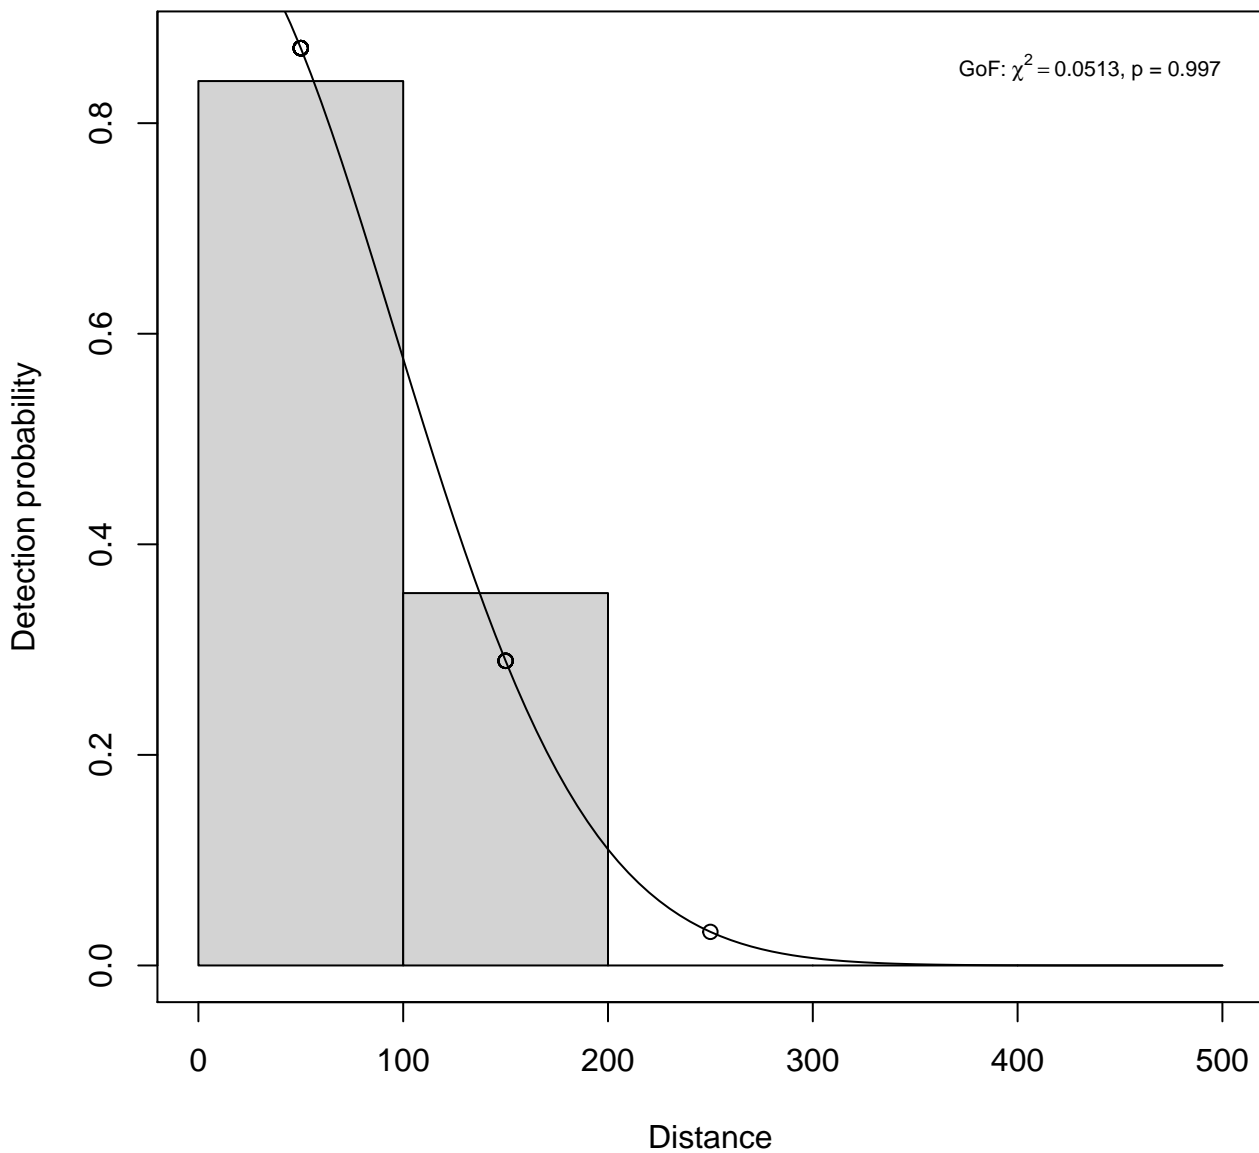

*Thectocercus acuticaudatus* – Cerrado – Brazil (N = 27, key function = hn)

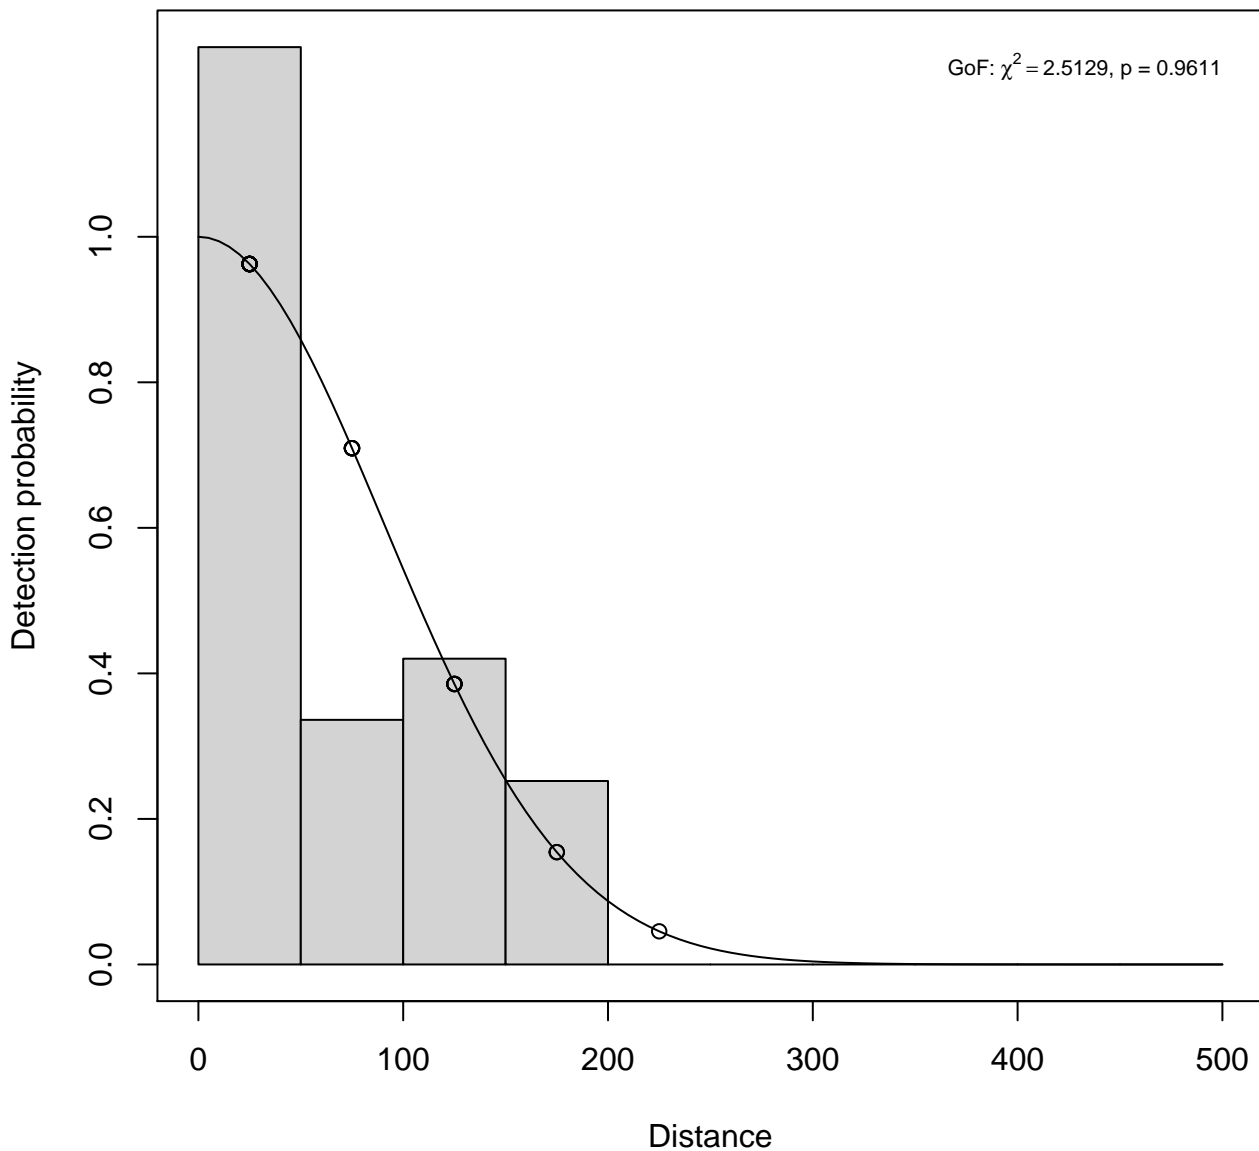

Supplement: s1 [file s1]
