# Supplementary material
Source: MDPI journal article supplement (https://www.mdpi.com/1424-2818/13/7/300)

# ***Eupsittula cactorum* – Caatinga – Brazil**

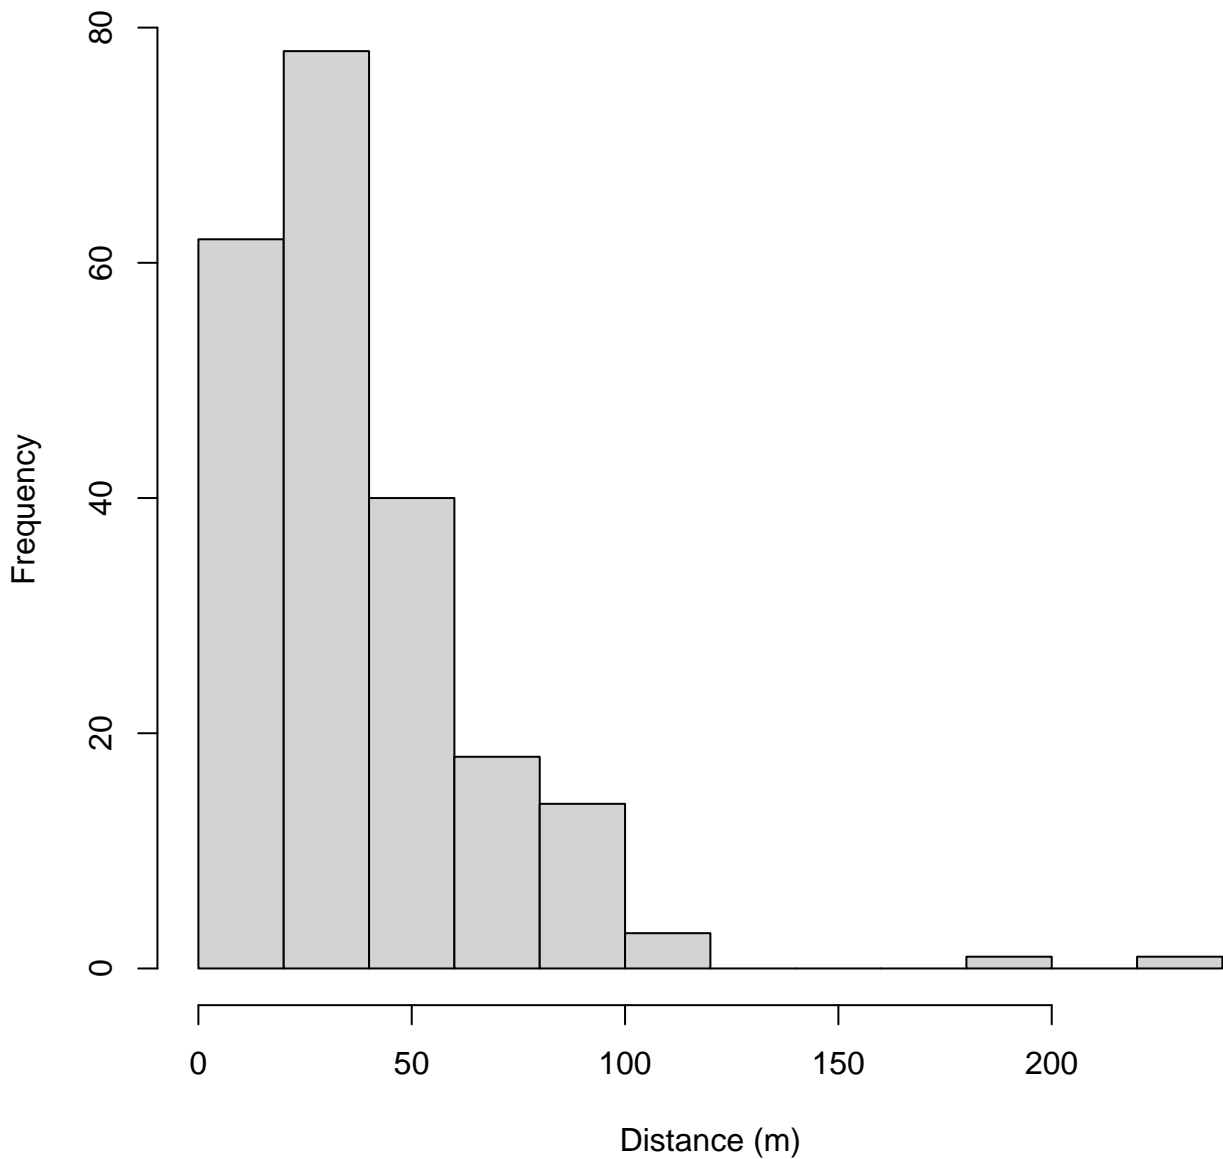

# **Eupsittula cactorum – Caatinga – Brazil**

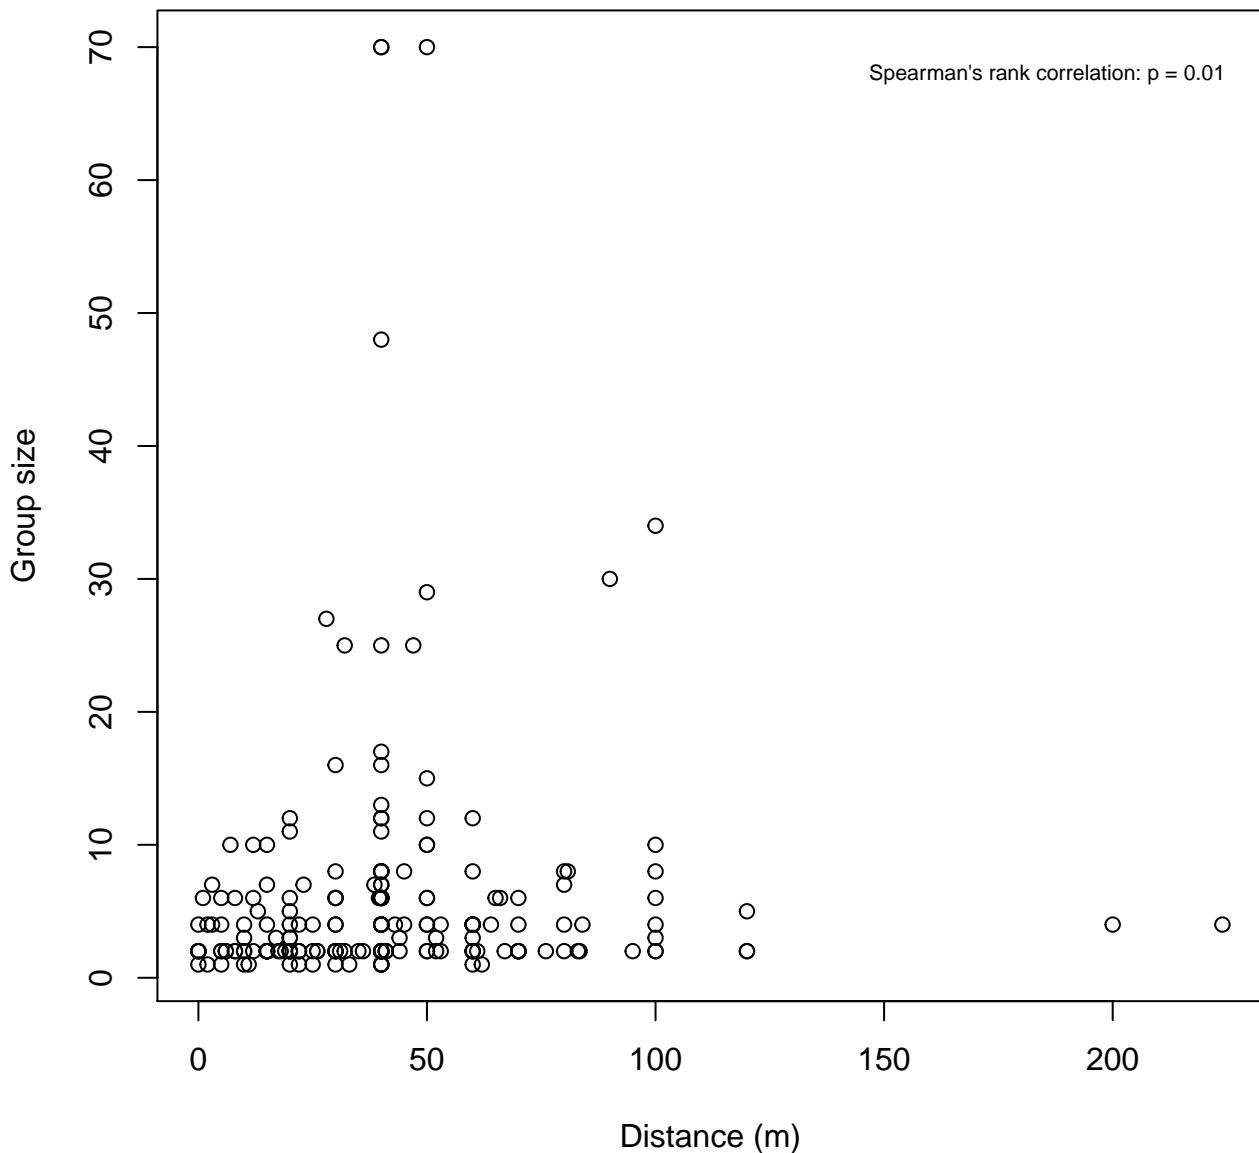

Eupsittula cactorum – Caatinga – Brazil (N = 217, key function = hr)

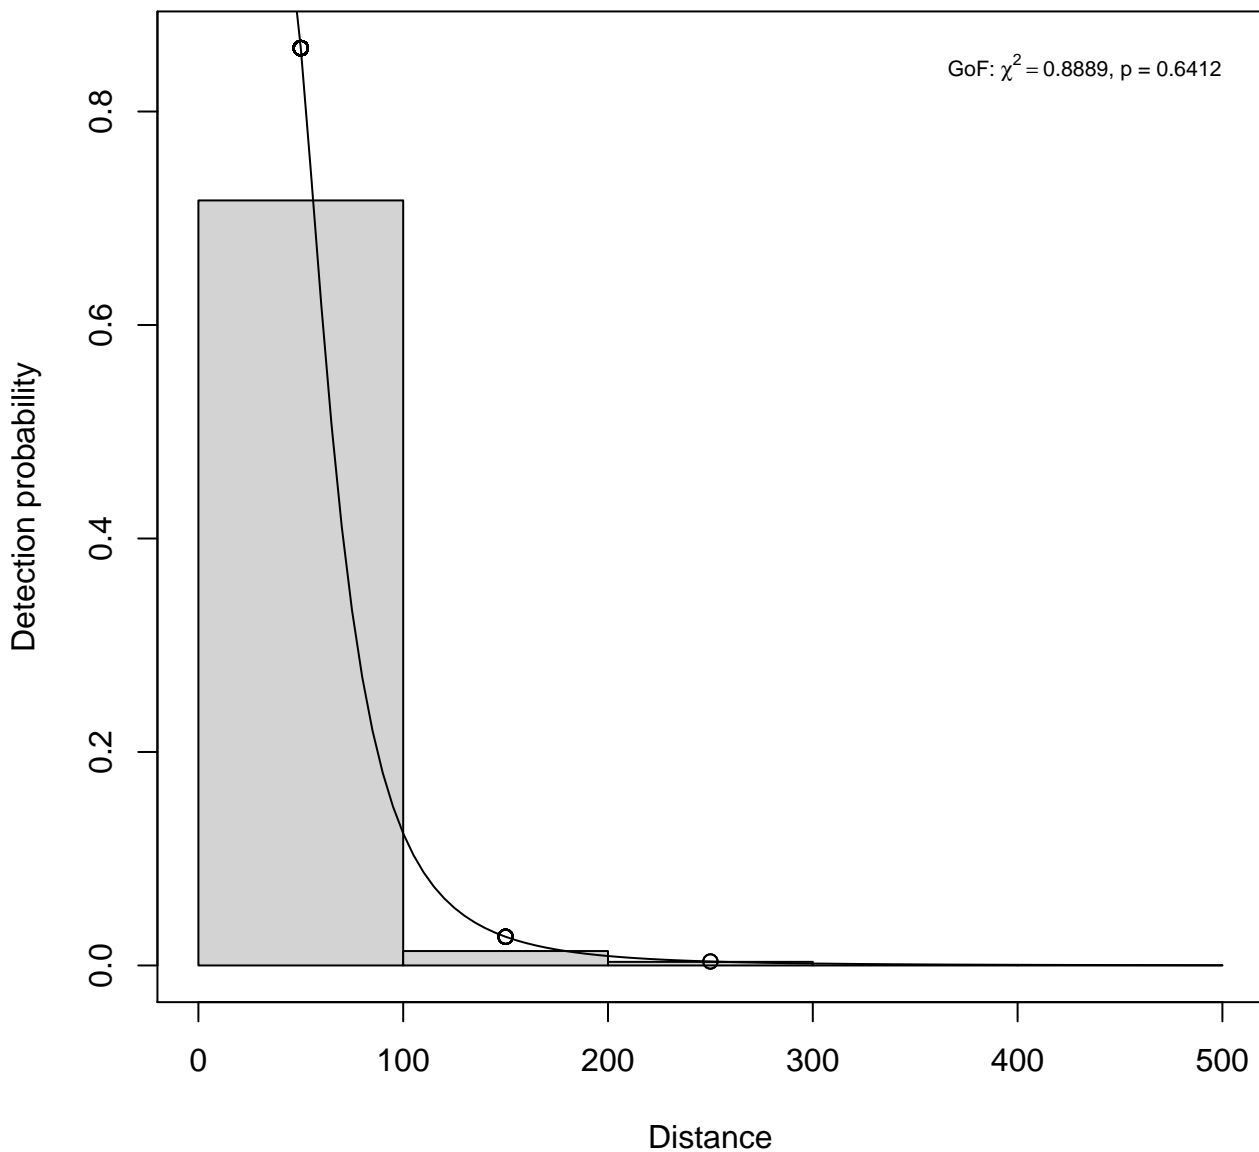

*Eupsittula cactorum* – Caatinga – Brazil (N = 217, key function = hr)

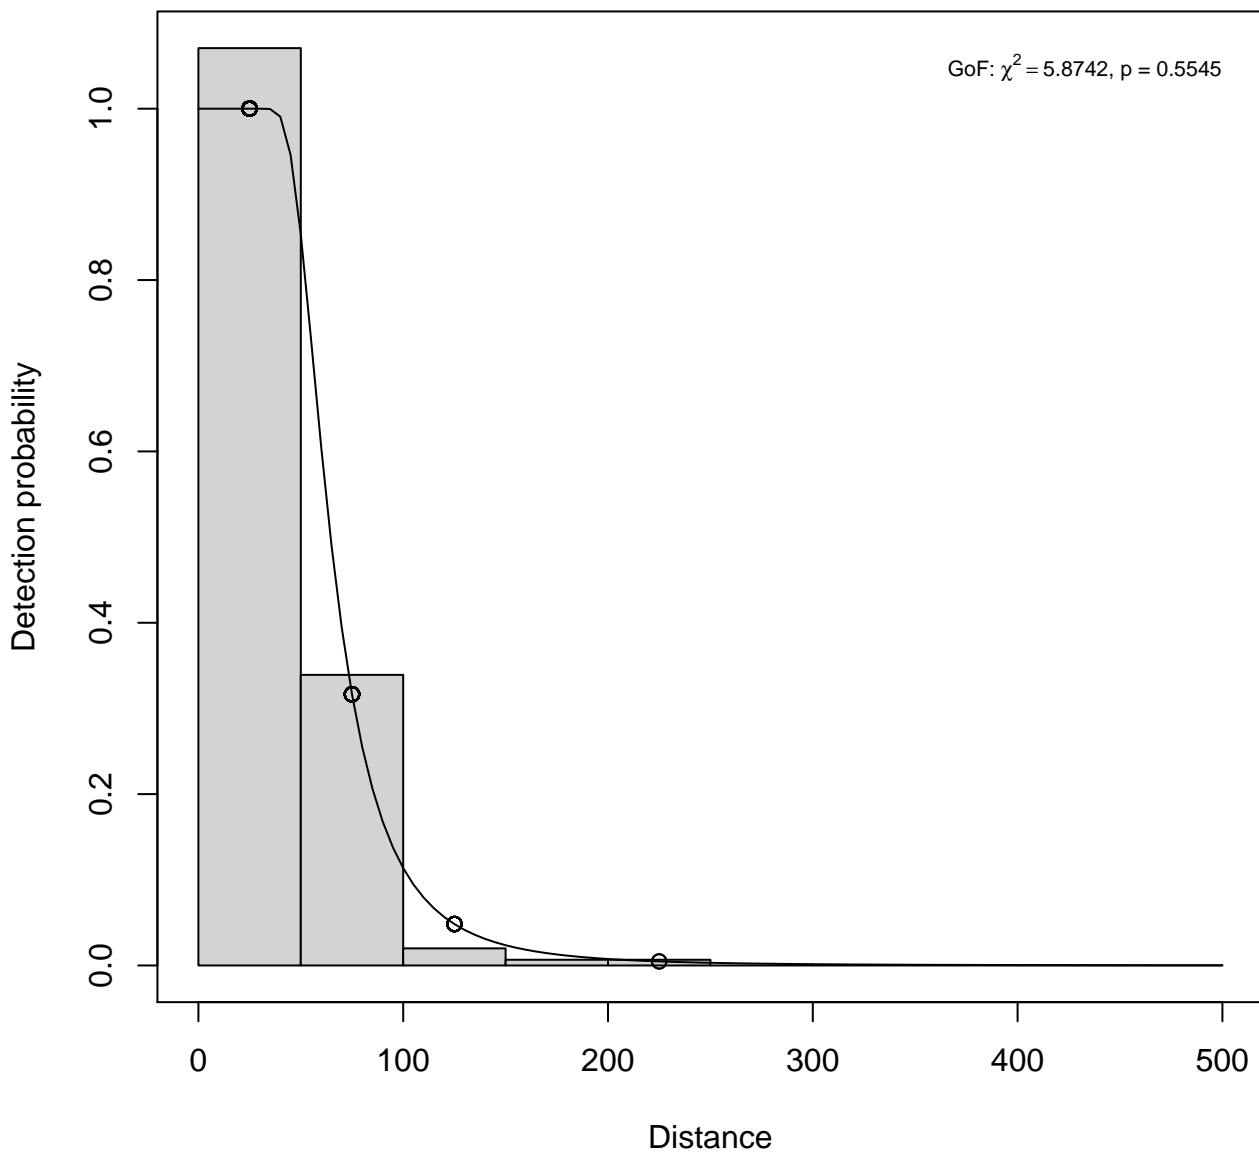

Eupsittula cactorum – Caatinga – Brazil (N = 217, key function = hr)

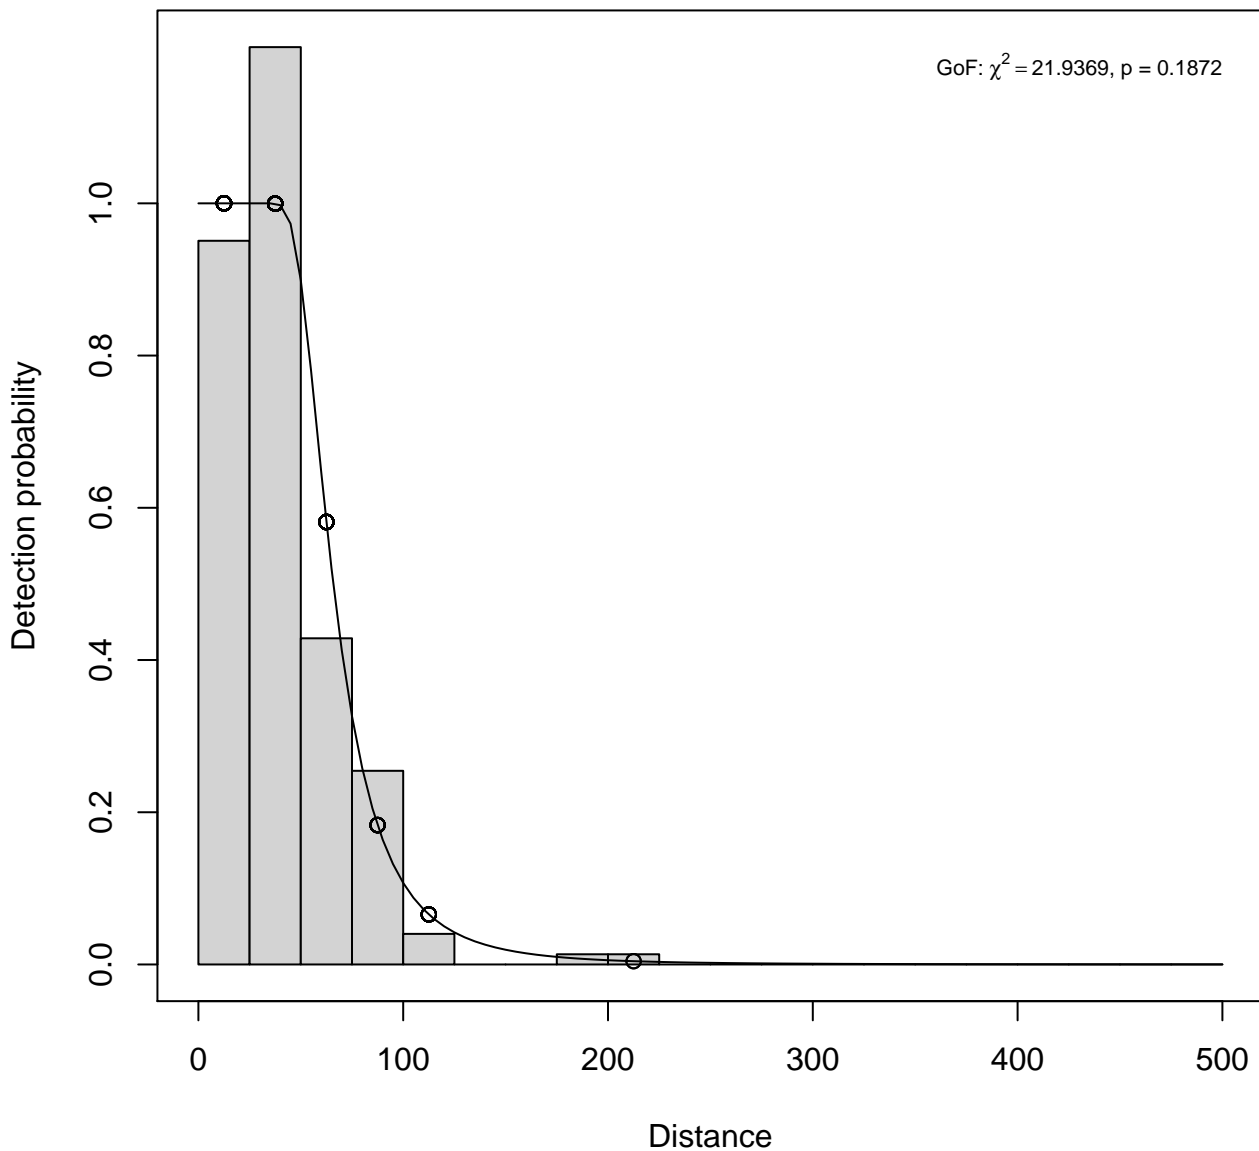

Supplement: s1 [file s1]
