# Supplementary material
Source: MDPI journal article supplement (https://www.mdpi.com/1424-2818/13/7/300)

**Trichoglossus chlorolepidotus – Eastern Australian temperate forests – Aust**

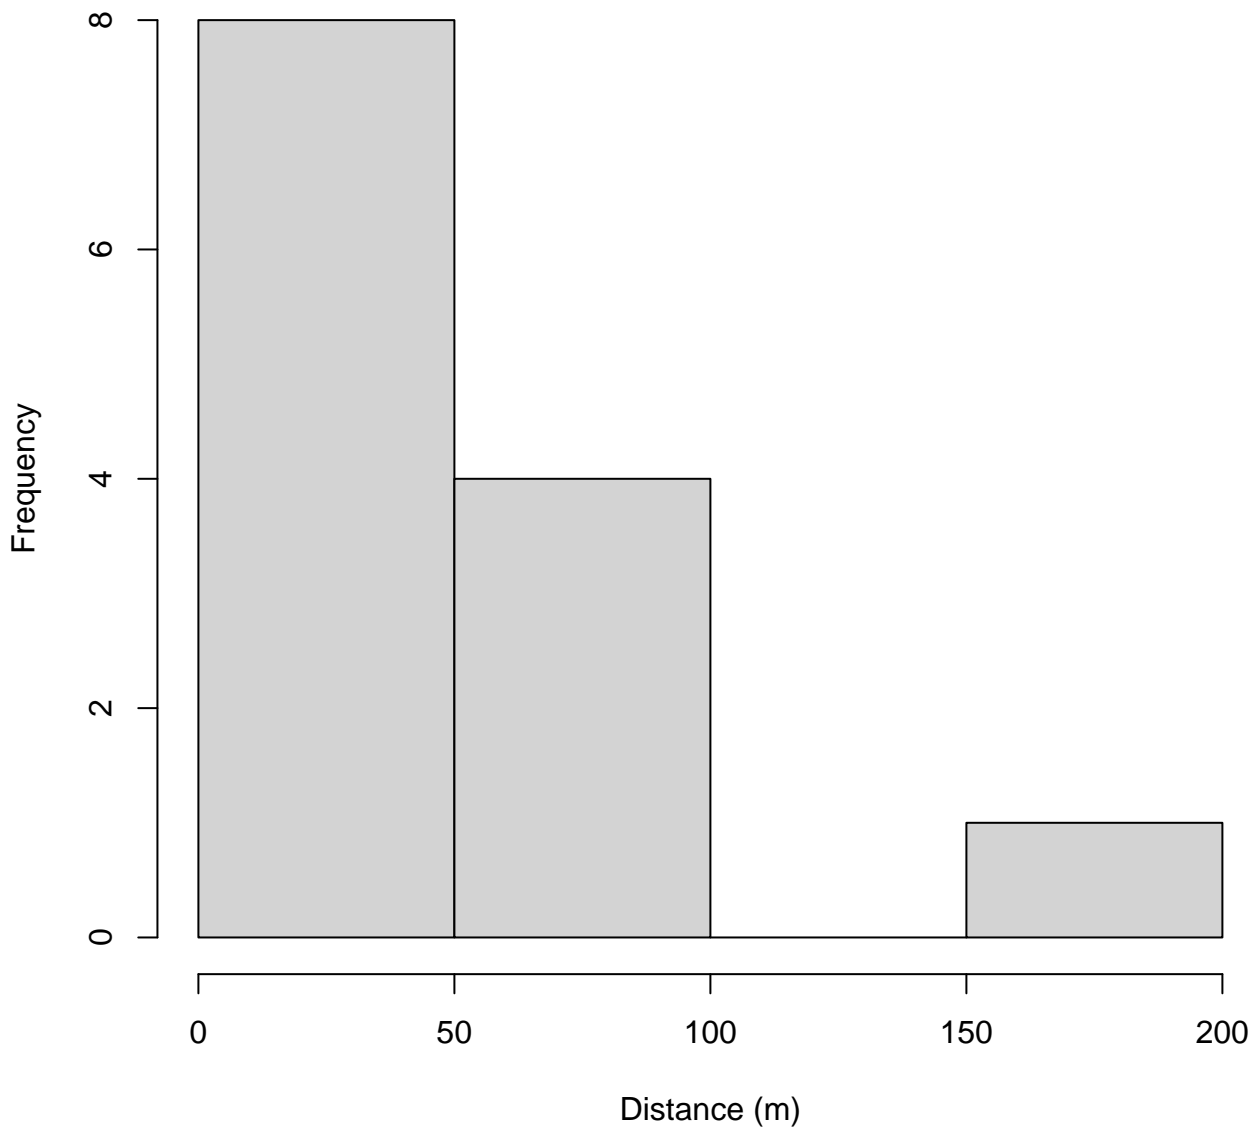

# Trichoglossus chlorolepidotus – Eastern Australian temperate forests – Australia

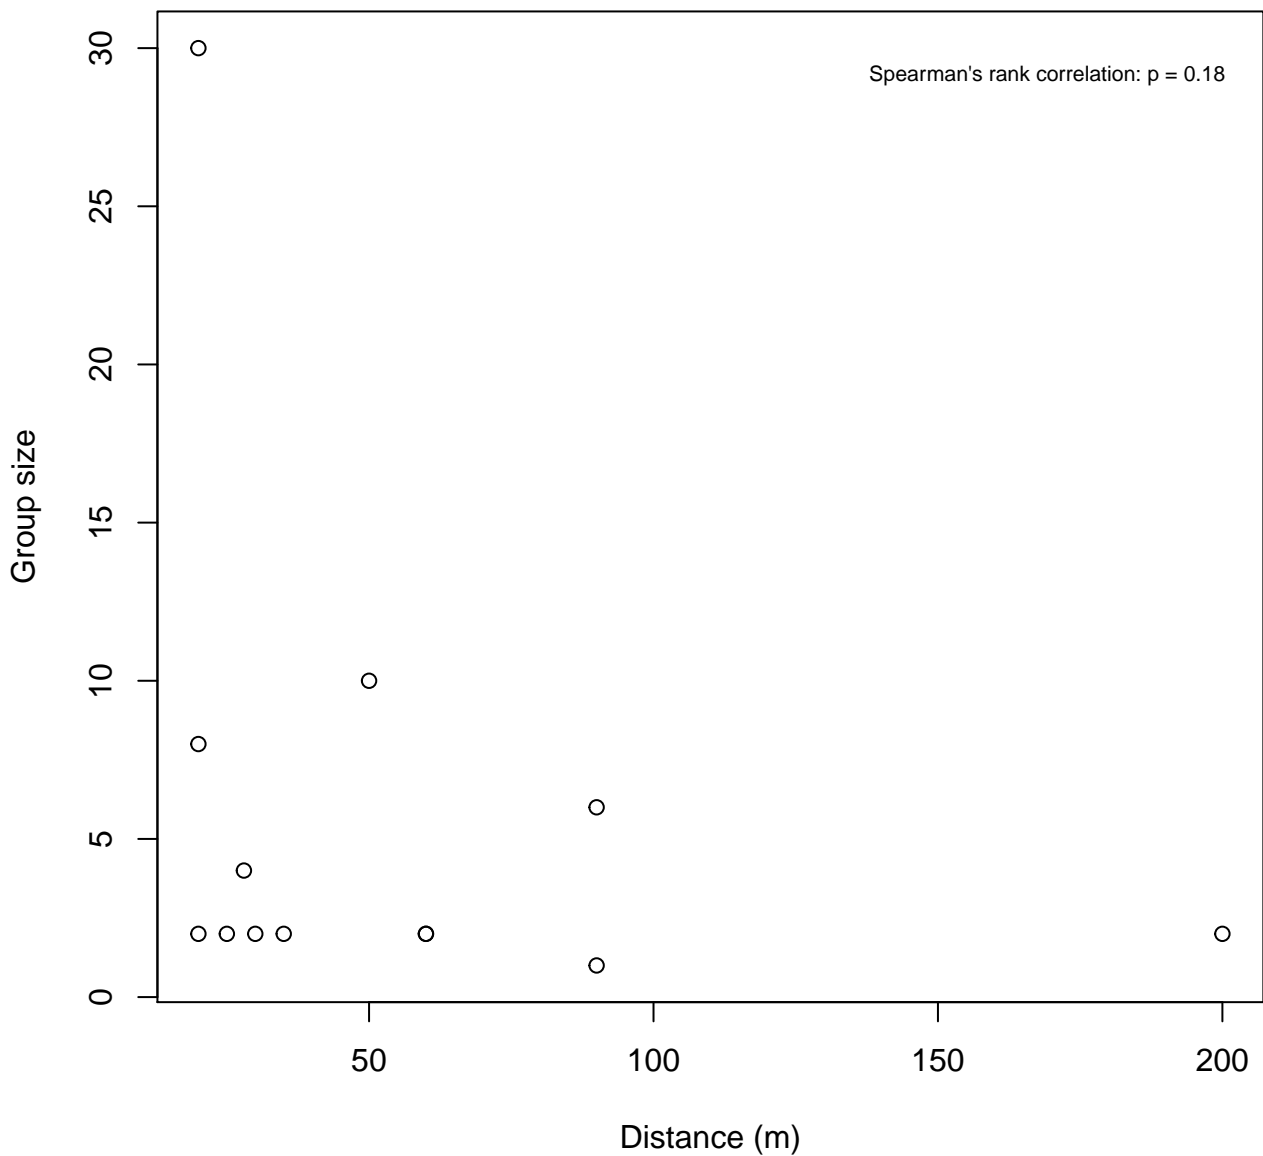

*Trichoglossus chlorolepidotus* – Eastern Australian temperate forests – Australia (N = 13, key function = hn)

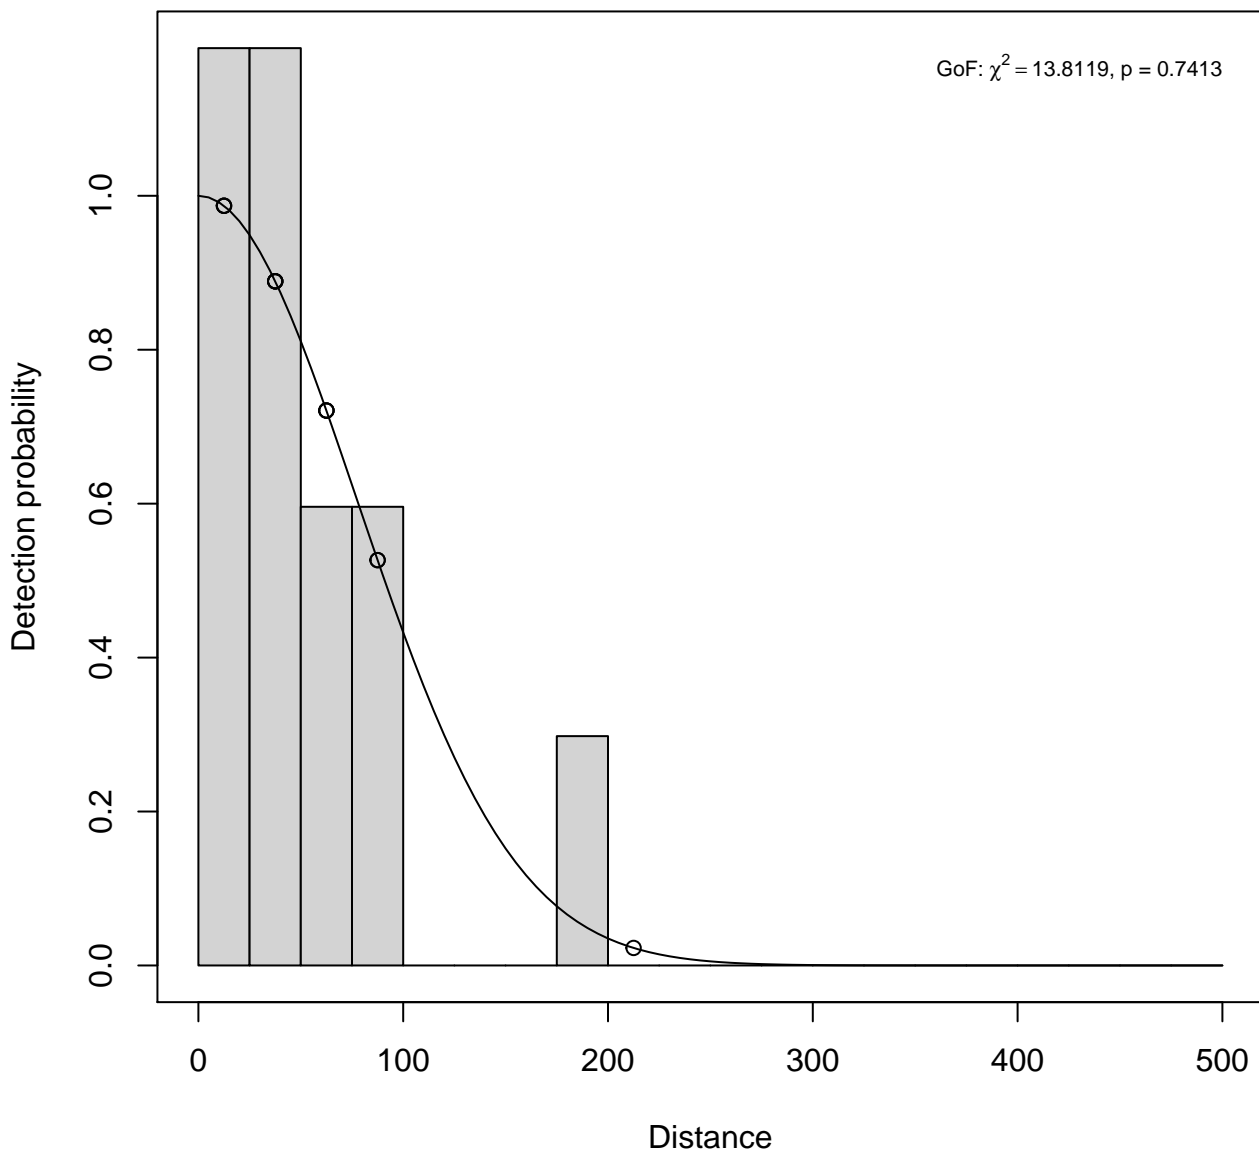

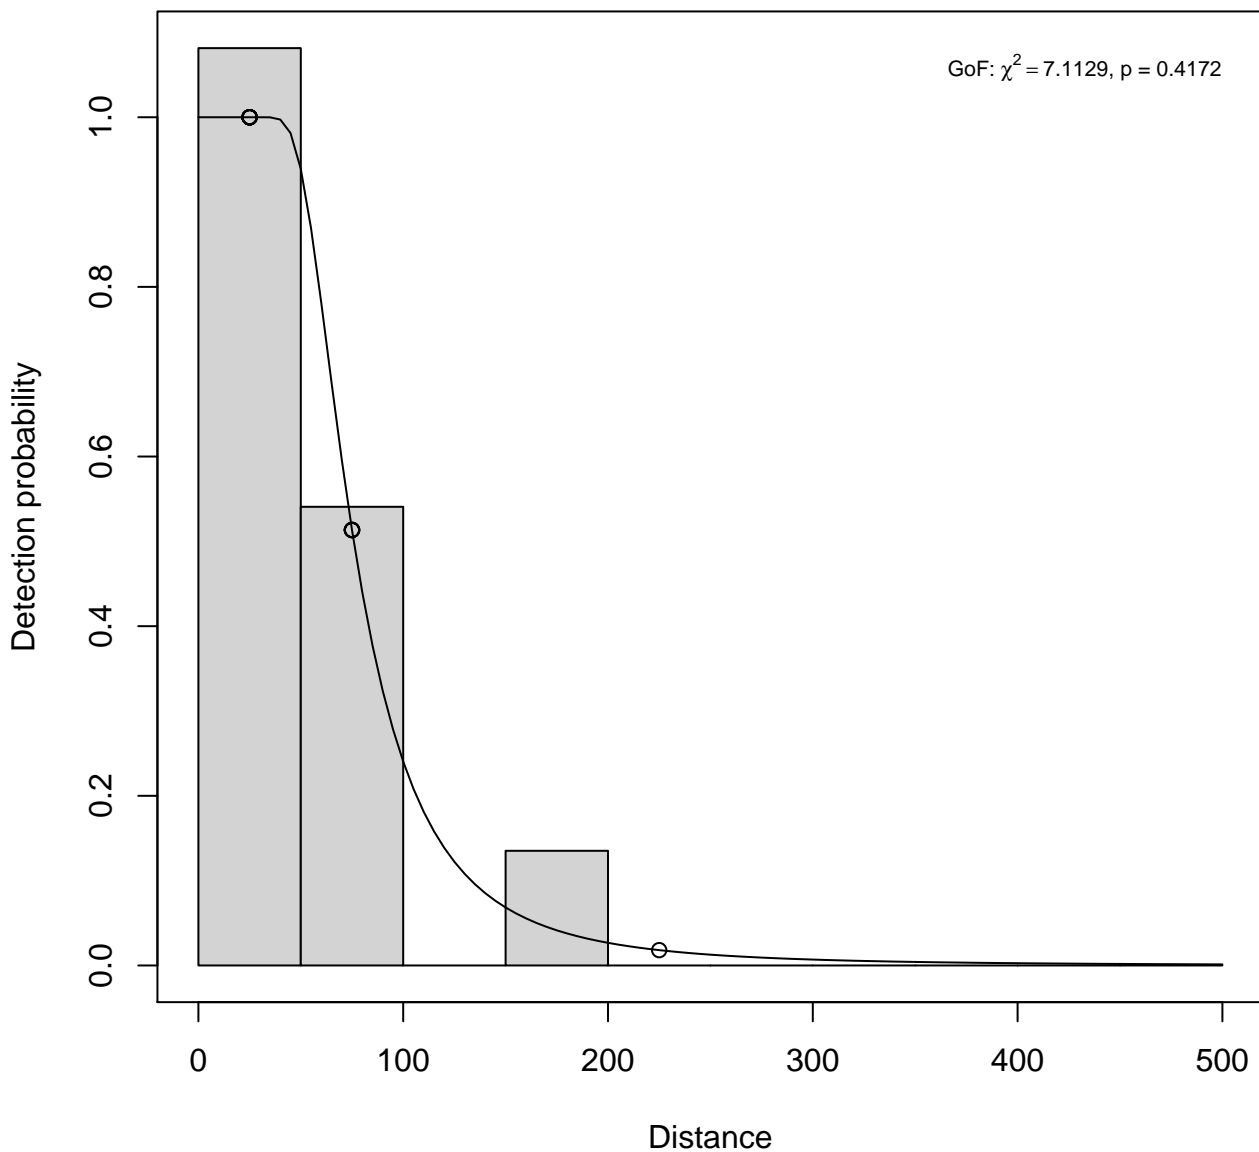

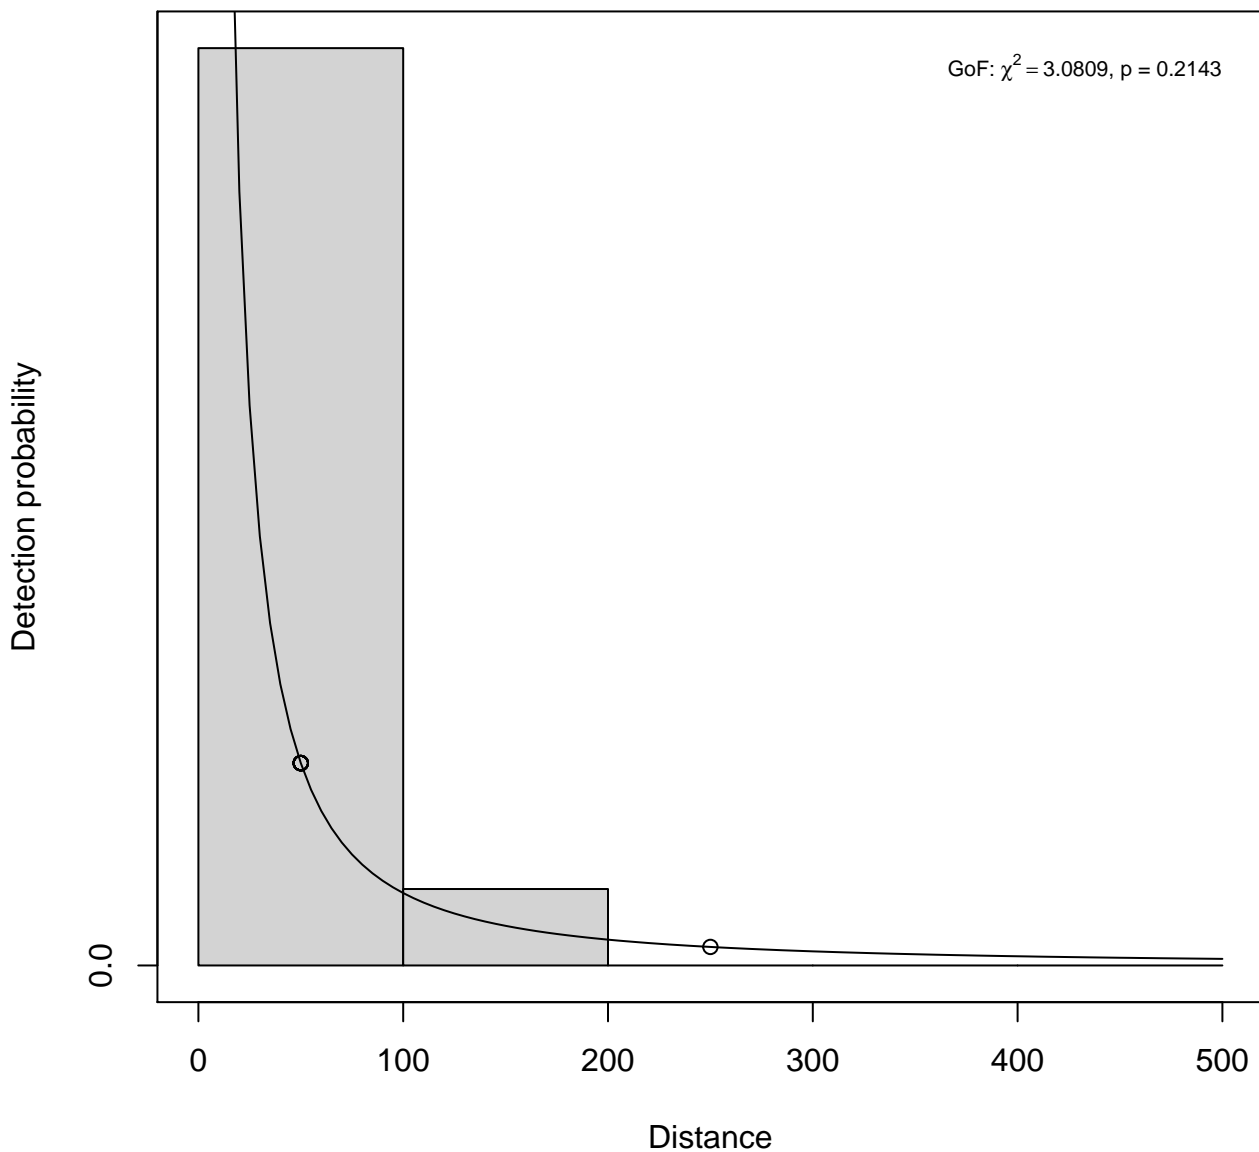

Supplement: s1 [file s1]
