# Supplementary material
Source: MDPI journal article supplement (https://www.mdpi.com/1424-2818/13/7/300)

# **Amazona ochrocephala – Sinu Valley dry forests – Colombia**

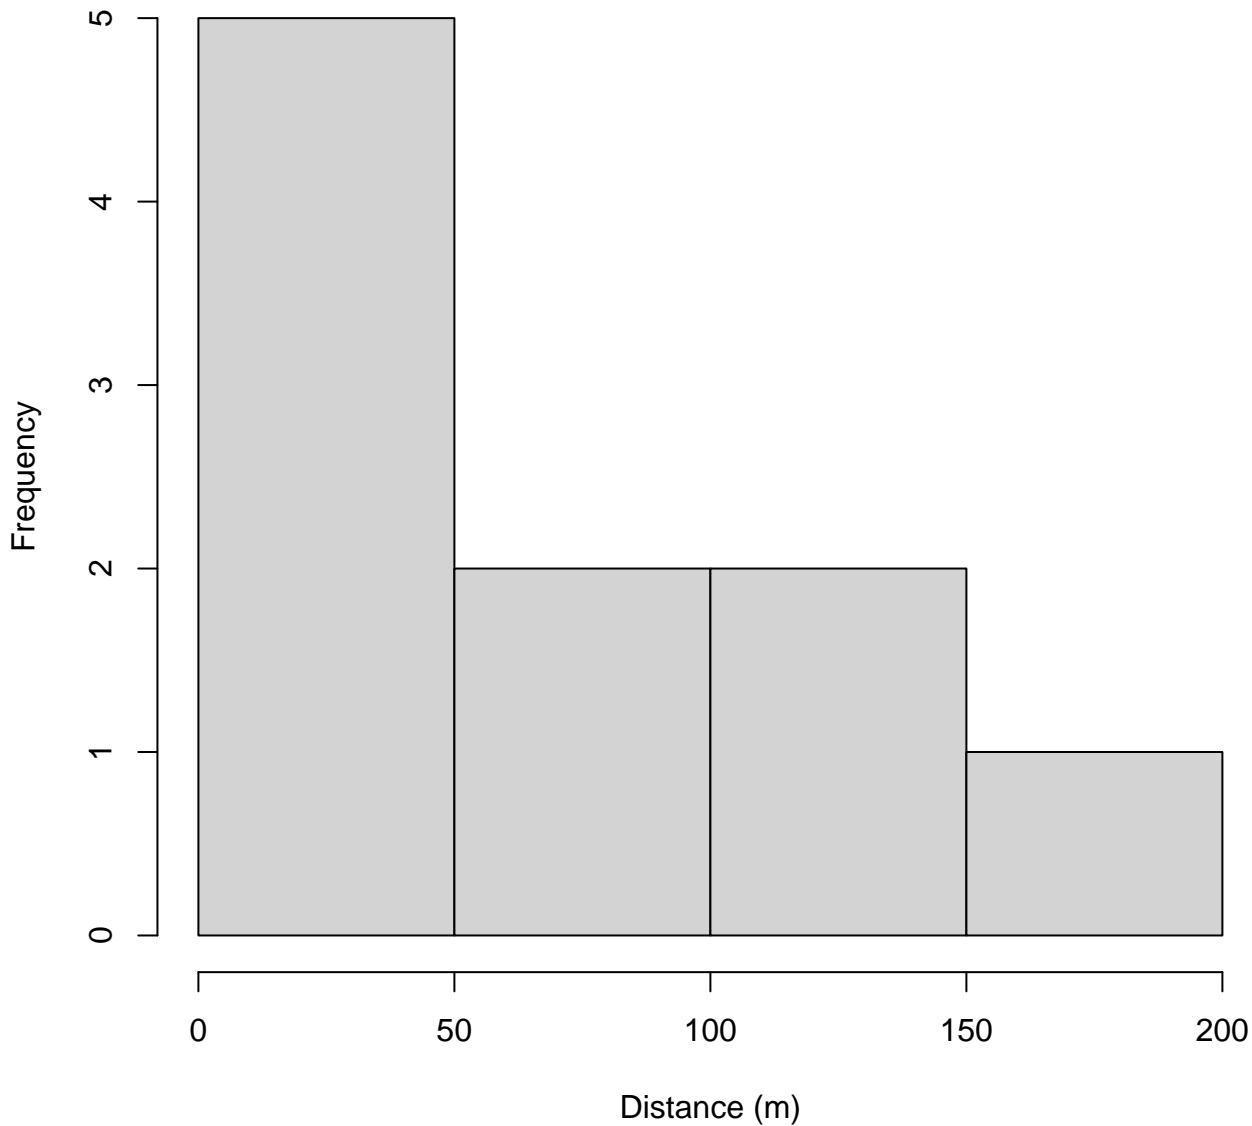

# Amazona ochrocephala – Sinu Valley dry forests – Colombia

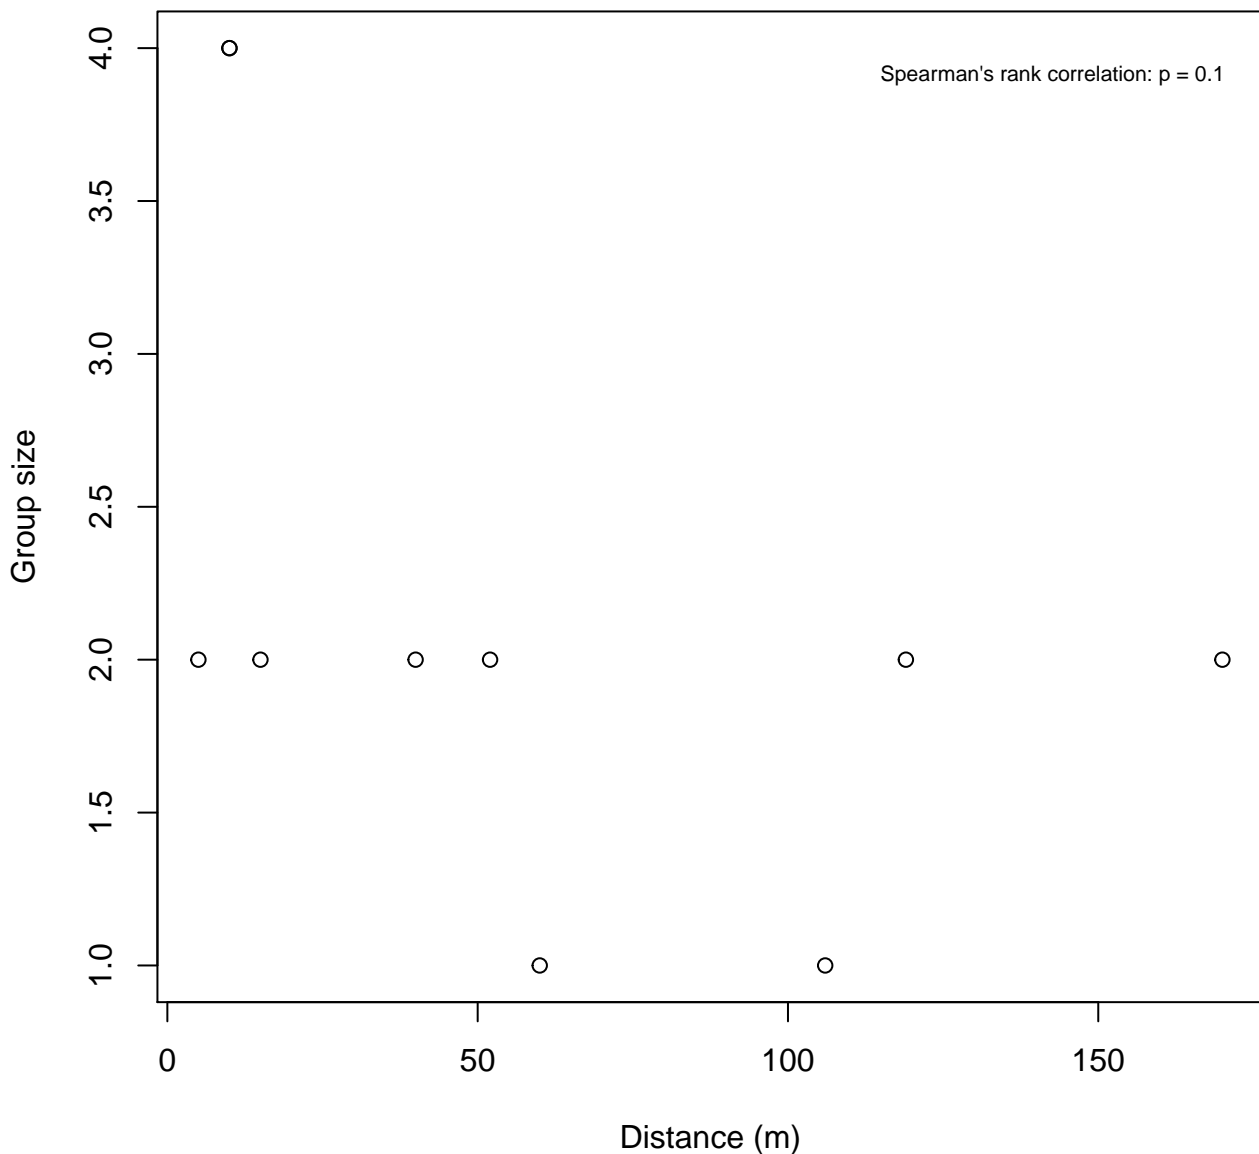

*Amazona ochrocephala* – Sinu Valley dry forests – Colombia (N = 10, key function = hn)

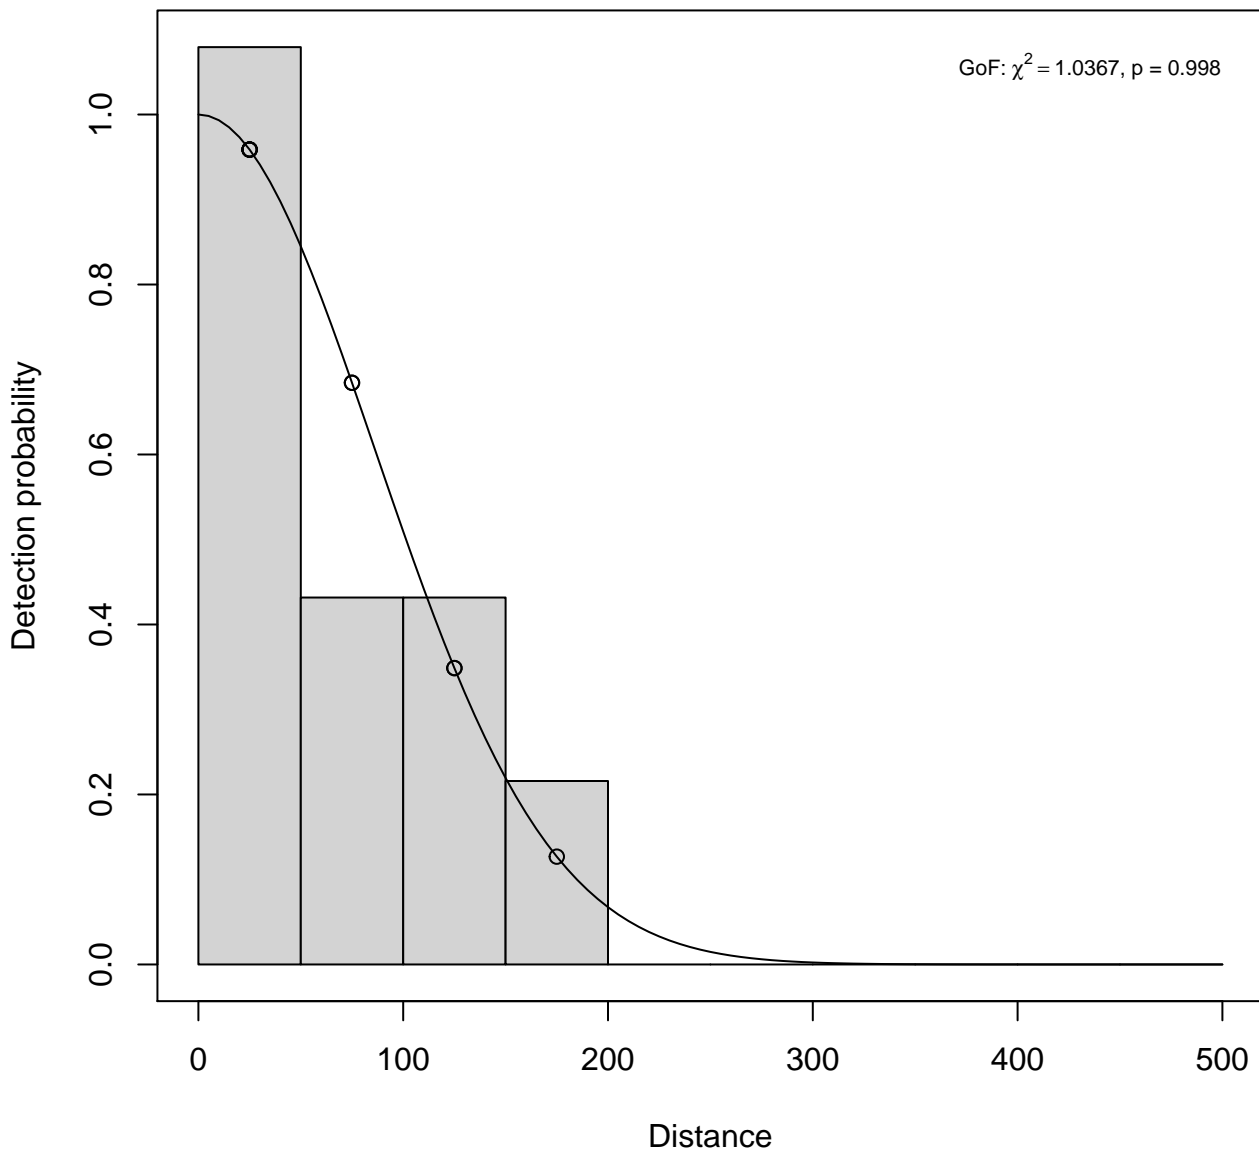

*Amazona ochrocephala* – Sinu Valley dry forests – Colombia (N = 10, key function = hn)

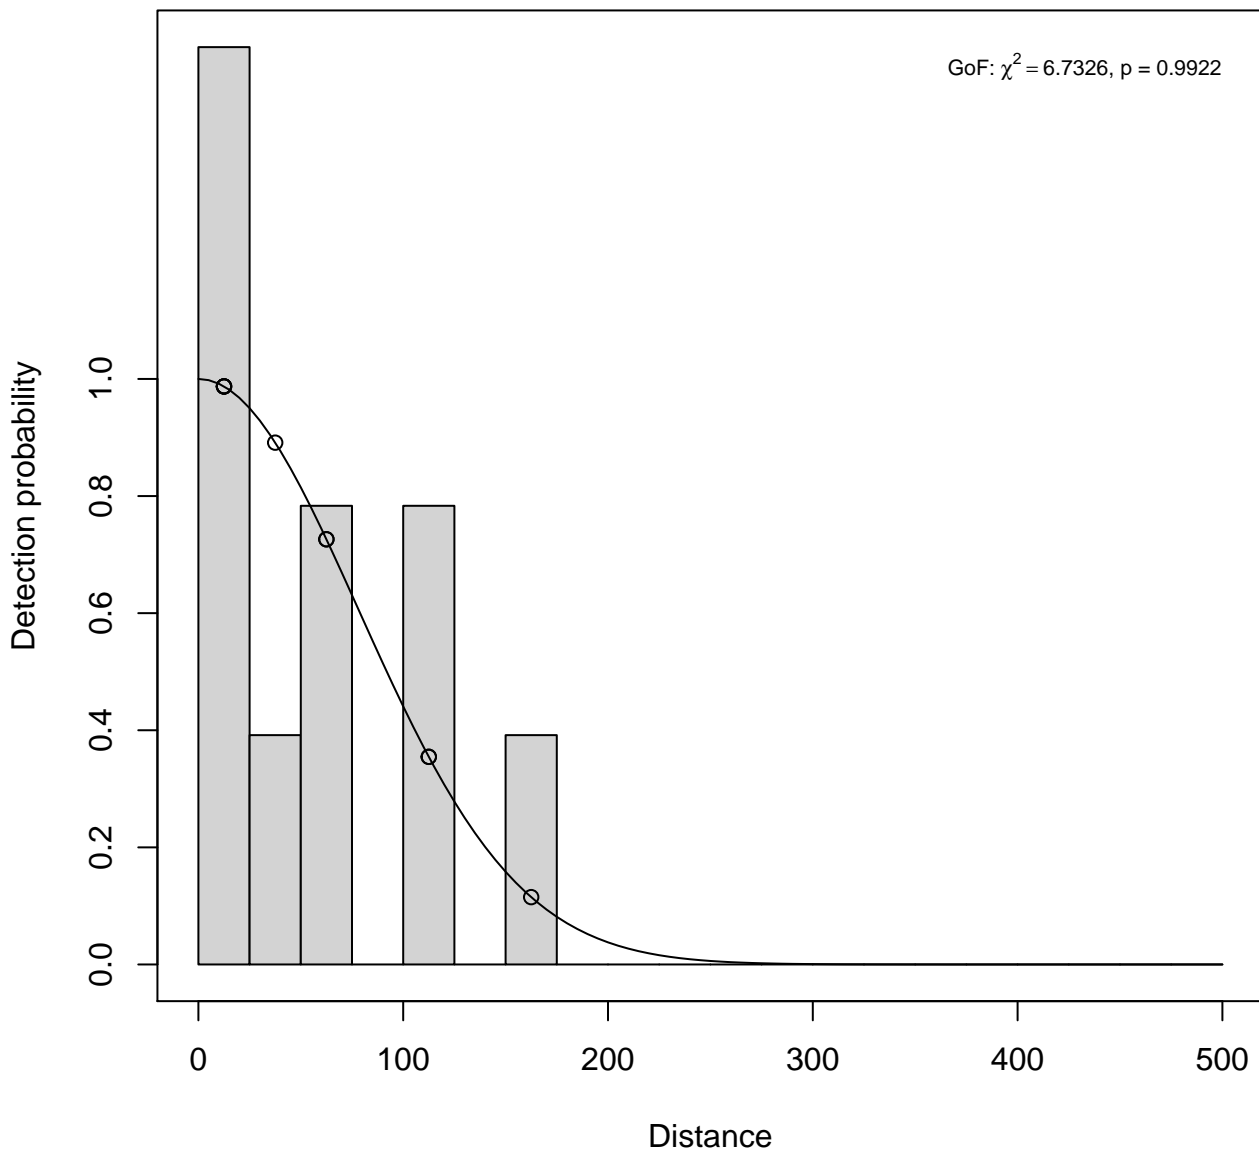

*Amazona ochrocephala* – Sinu Valley dry forests – Colombia (N = 10, key function = hn)

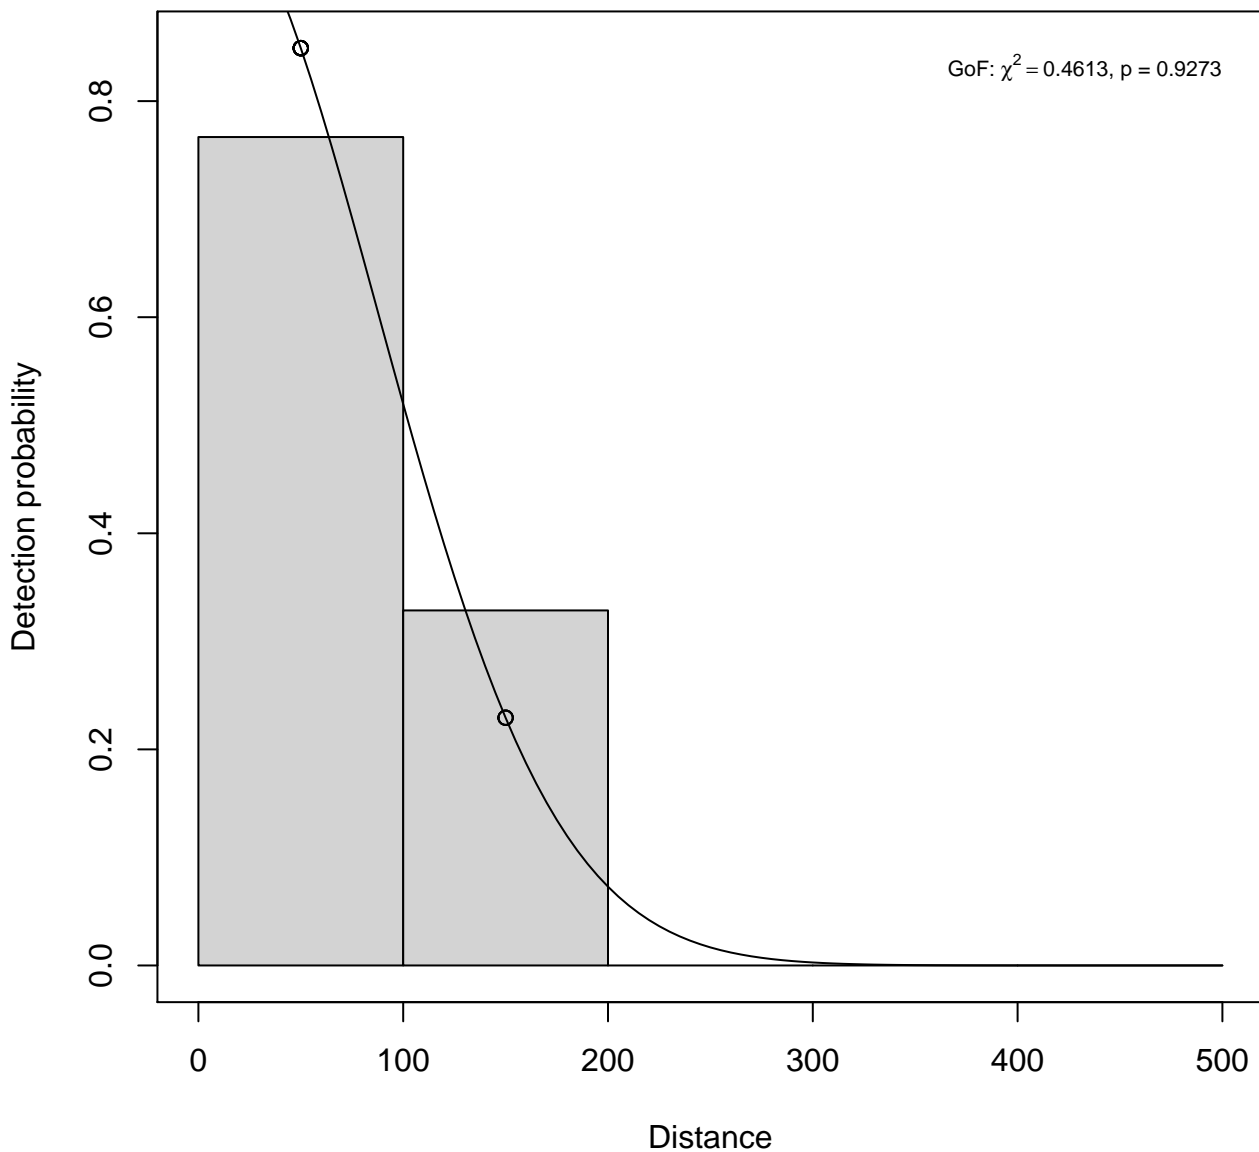

Supplement: s1 [file s1]
