# Supplementary material
Source: MDPI journal article supplement (https://www.mdpi.com/1424-2818/13/7/300)

# Brotoyeris jugularis – Magdalena–Uraba moist forests – Colombia

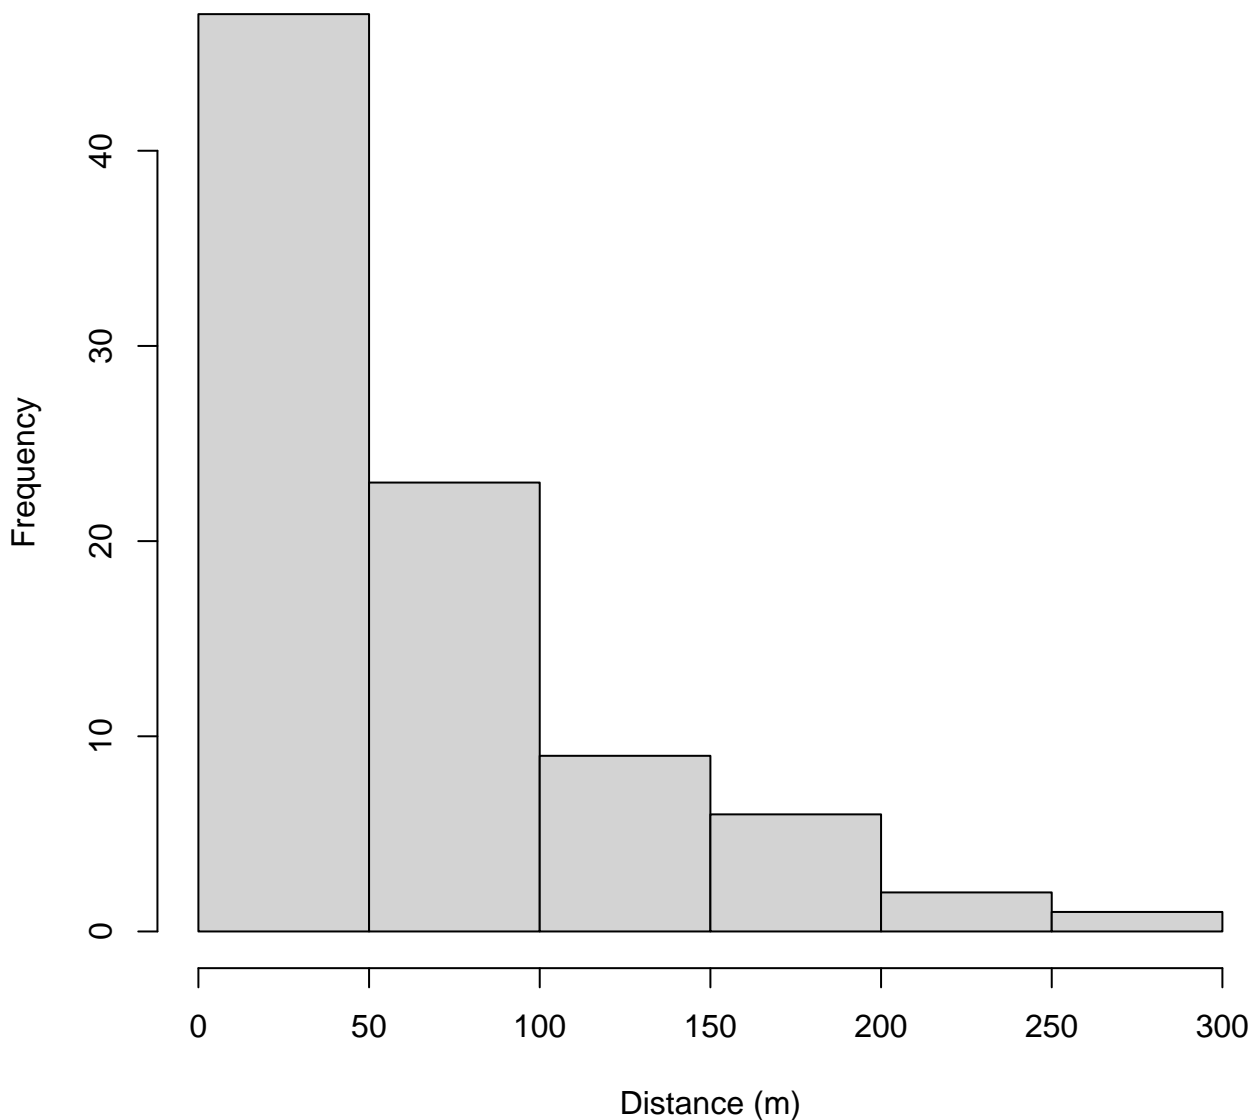

# Brotoyeris jugularis – Magdalena–Uraba moist forests – Colombia

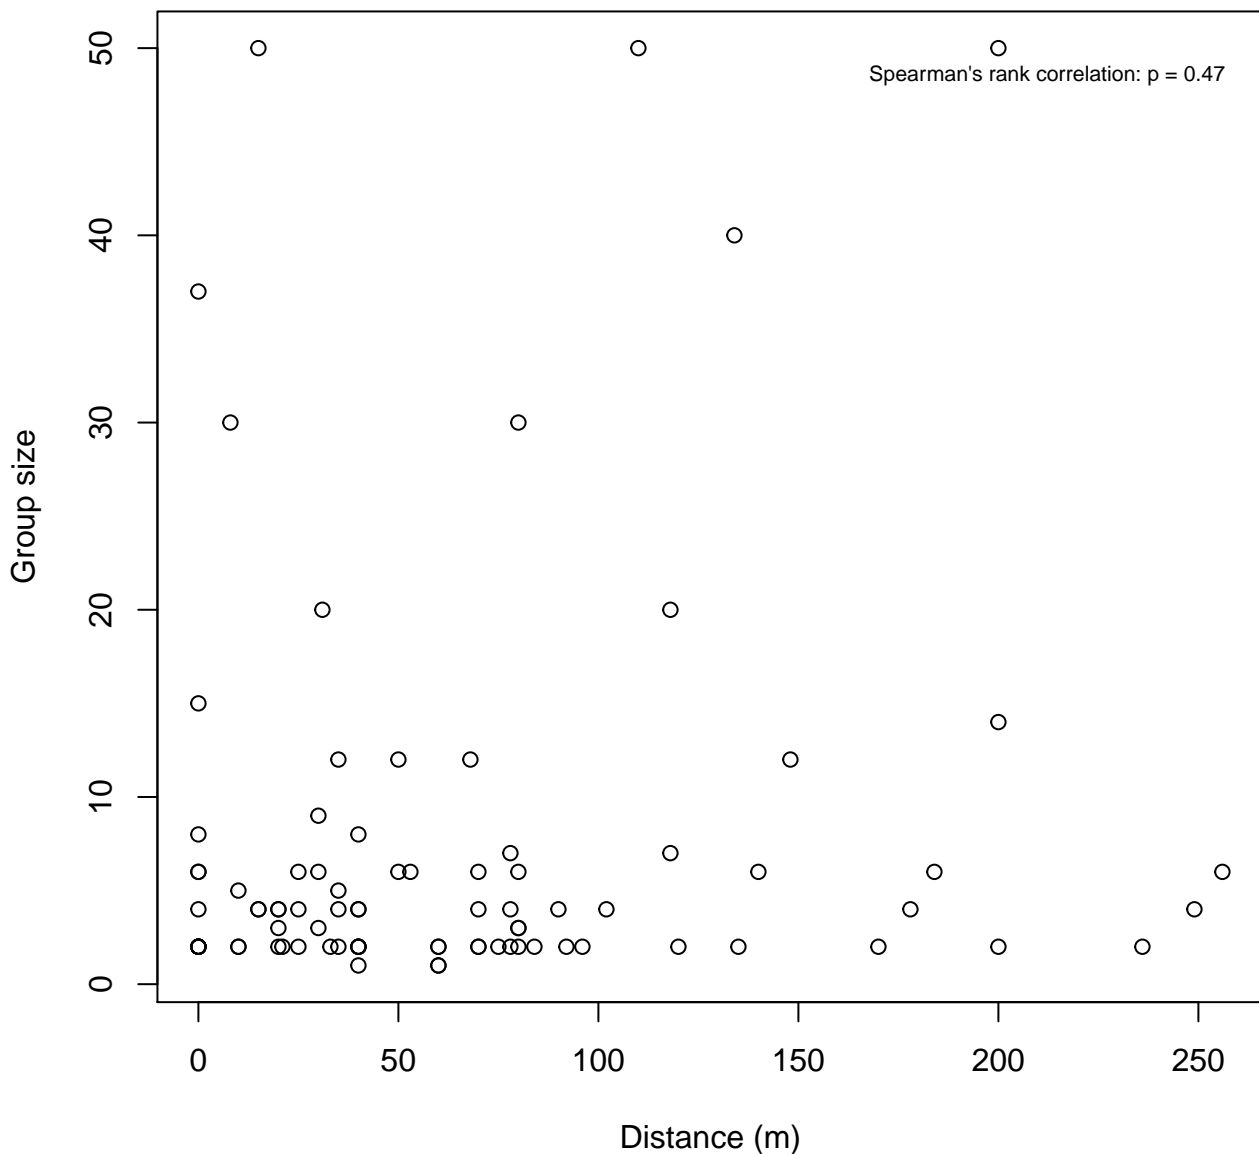

Brotogetis jugularis – Magdalena–Uraba moist forests – Colombia (N = 88, key function = hn)

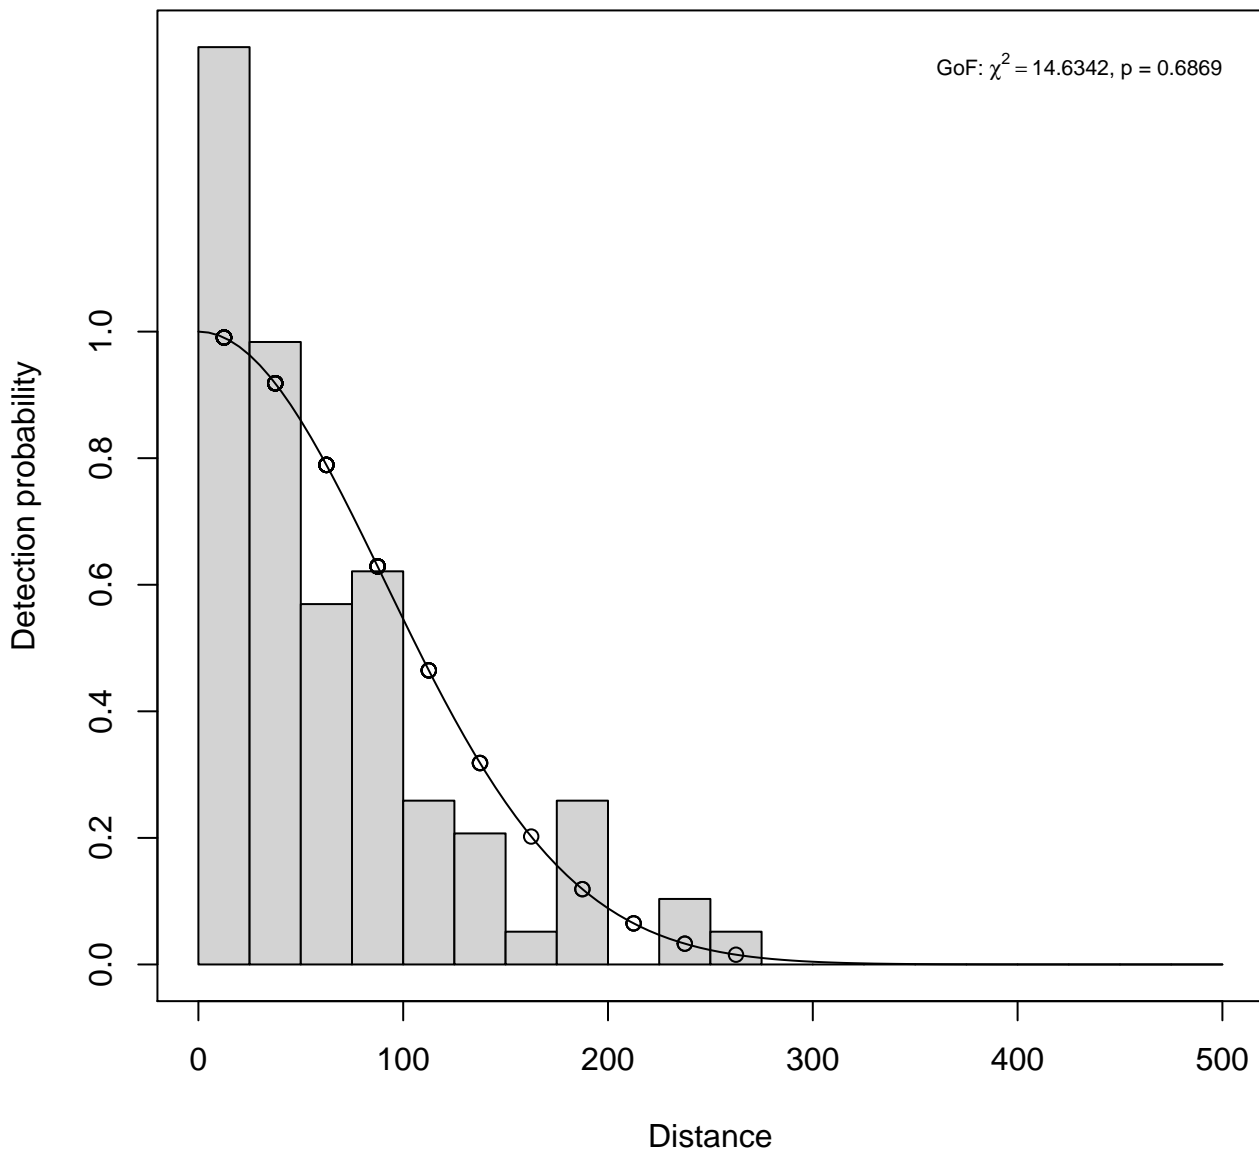

Brotoyeris jugularis – Magdalena–Uraba moist forests – Colombia (N = 88, key function = hr)

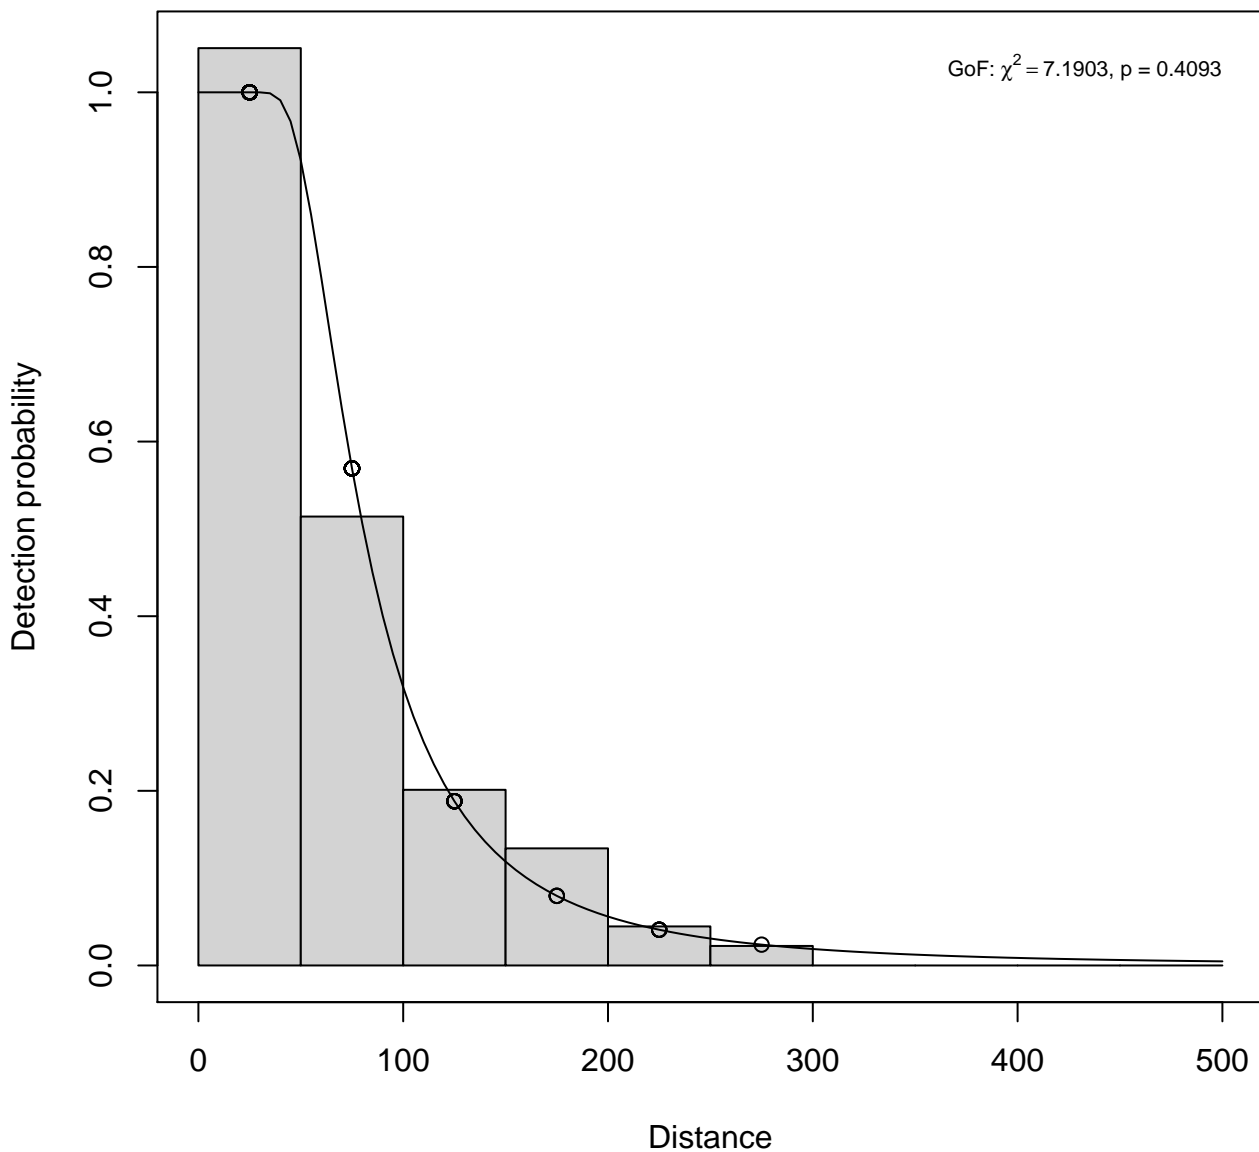

Brotoyeris jugularis – Magdalena–Uraba moist forests – Colombia (N = 88, key function = hr)

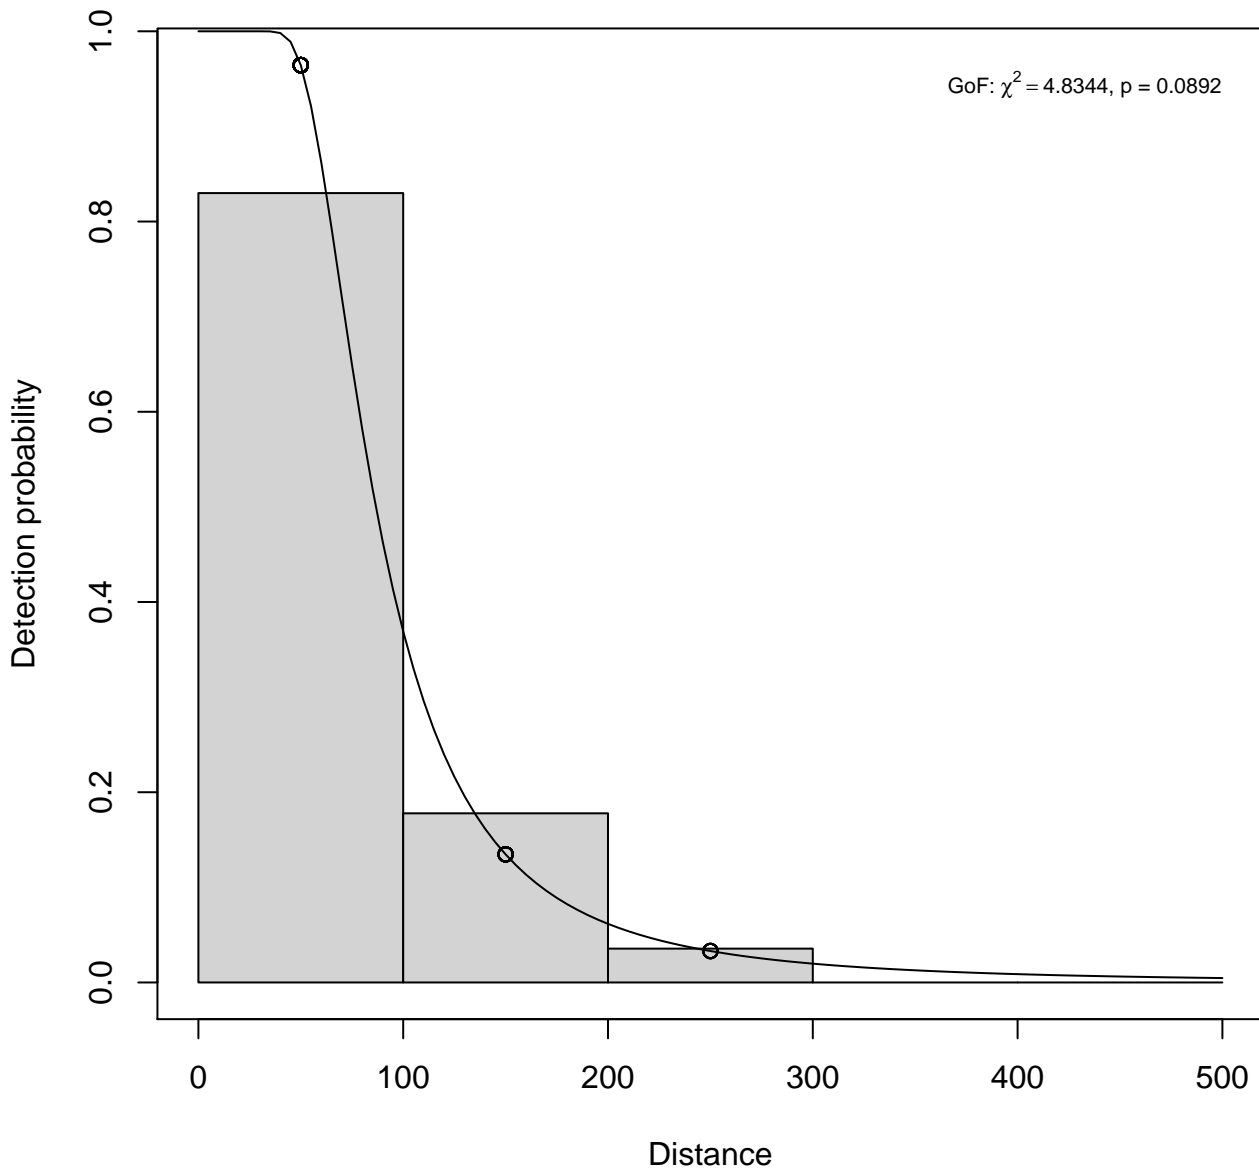

Supplement: s1 [file s1]
