# Supplementary material
Source: MDPI journal article supplement (https://www.mdpi.com/1424-2818/13/7/300)

# Enicognathus leptorhynchus – Chilean Matorral – Chile

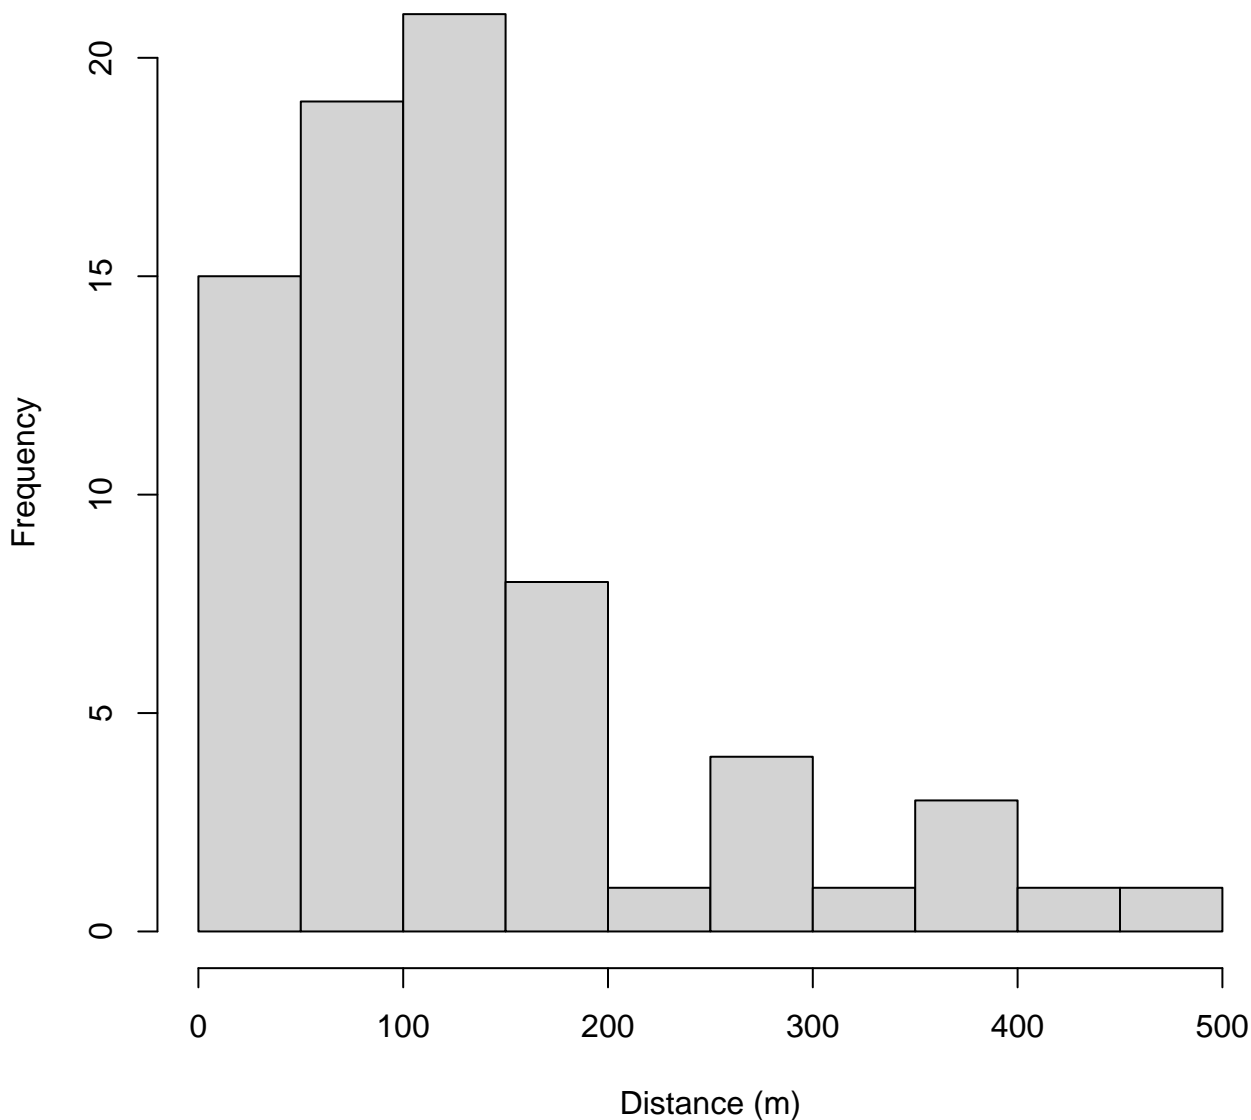

# Enicognathus leptorhynchus – Chilean Matorral – Chile

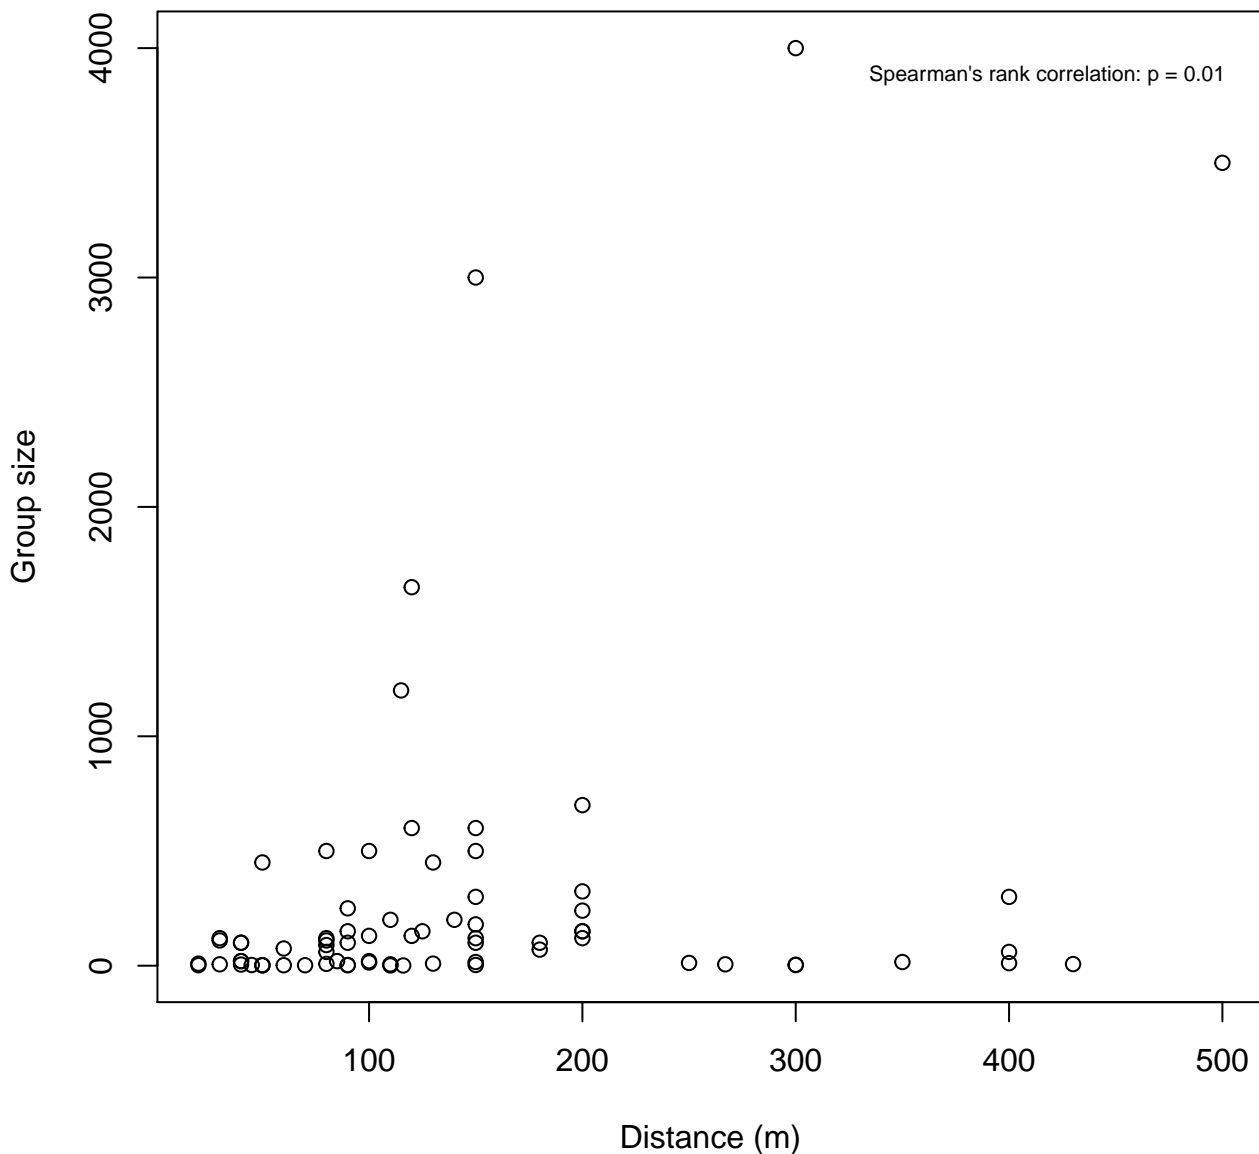

Enicognathus leptorhynchus – Chilean Matorral – Chile (N = 74, key function = hr)

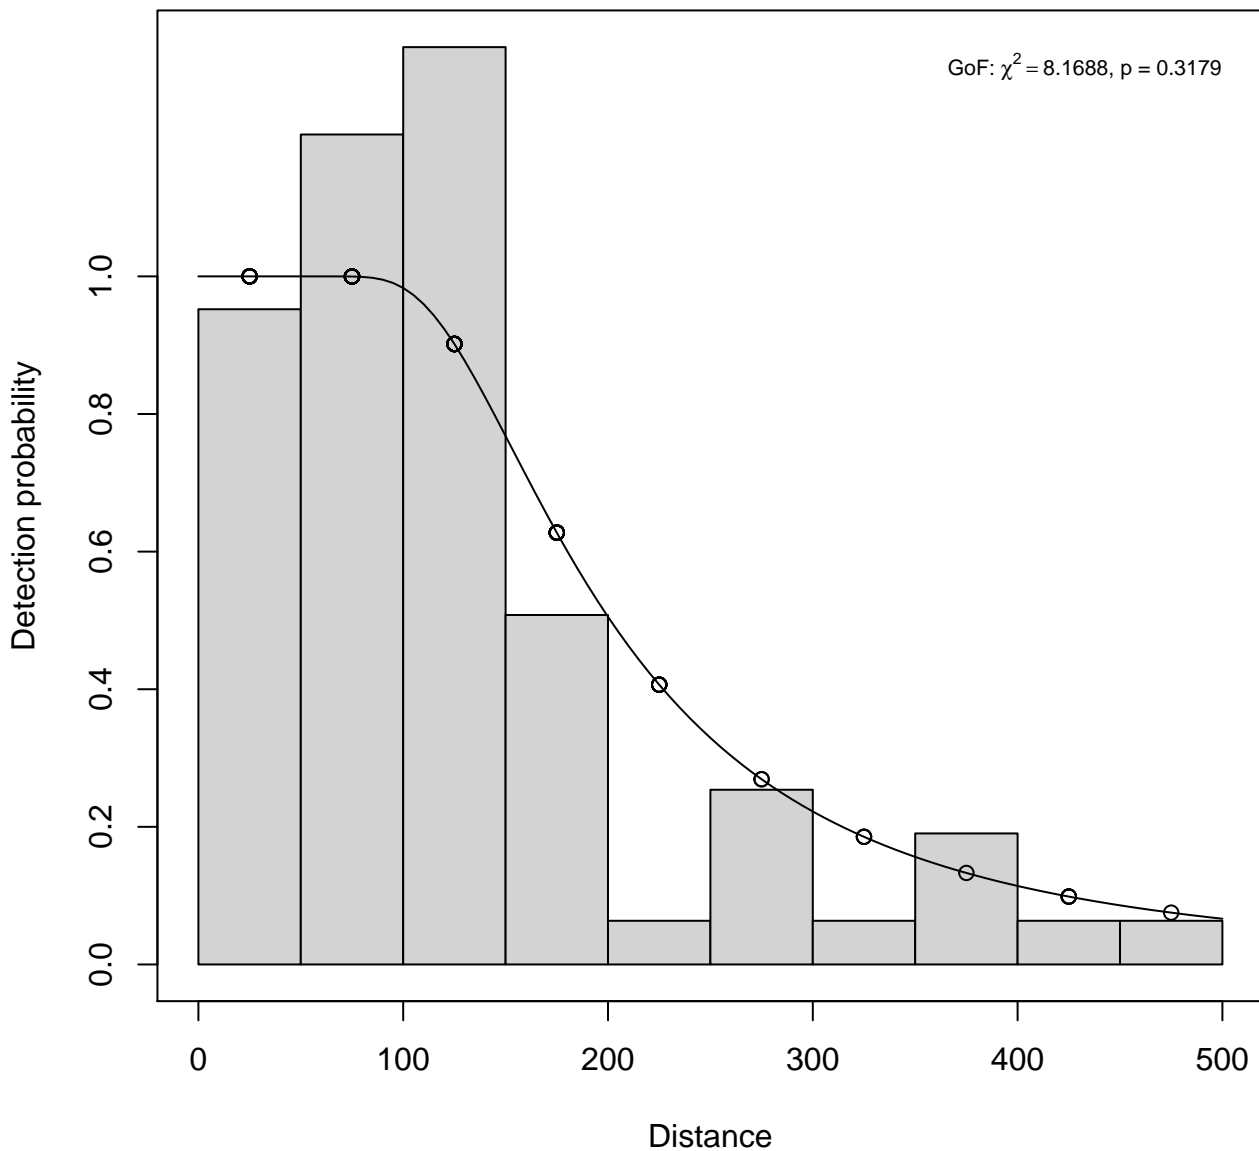

Enicognathus leptorhynchus – Chilean Matorral – Chile (N = 74, key function = unif)

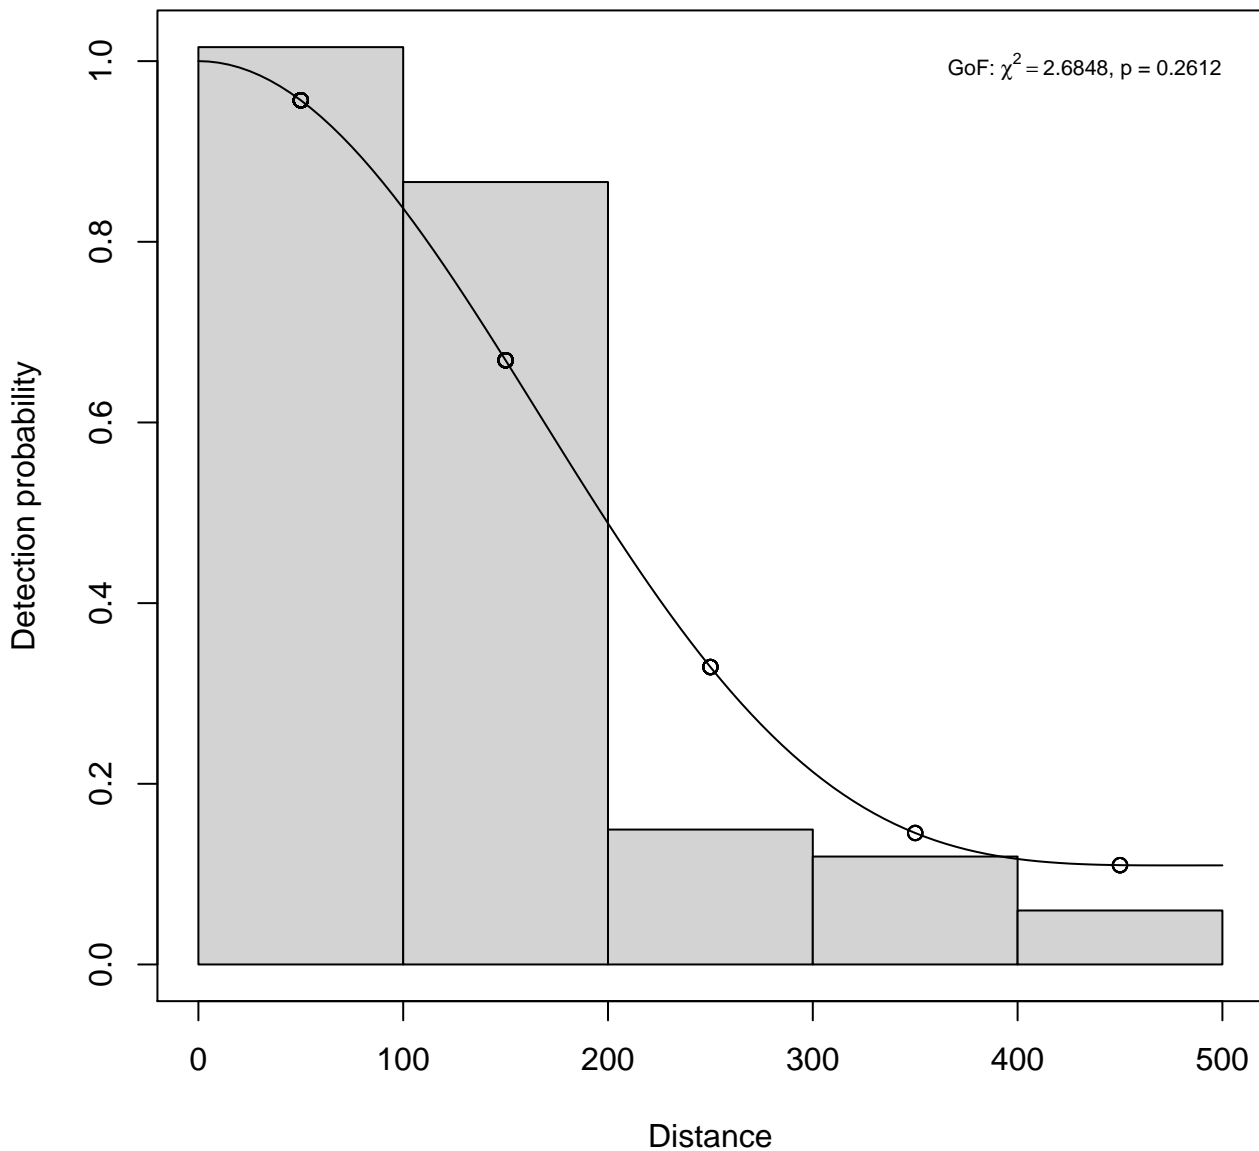

Enicognathus leptorhynchus – Chilean Matorral – Chile (N = 74, key function = hr)

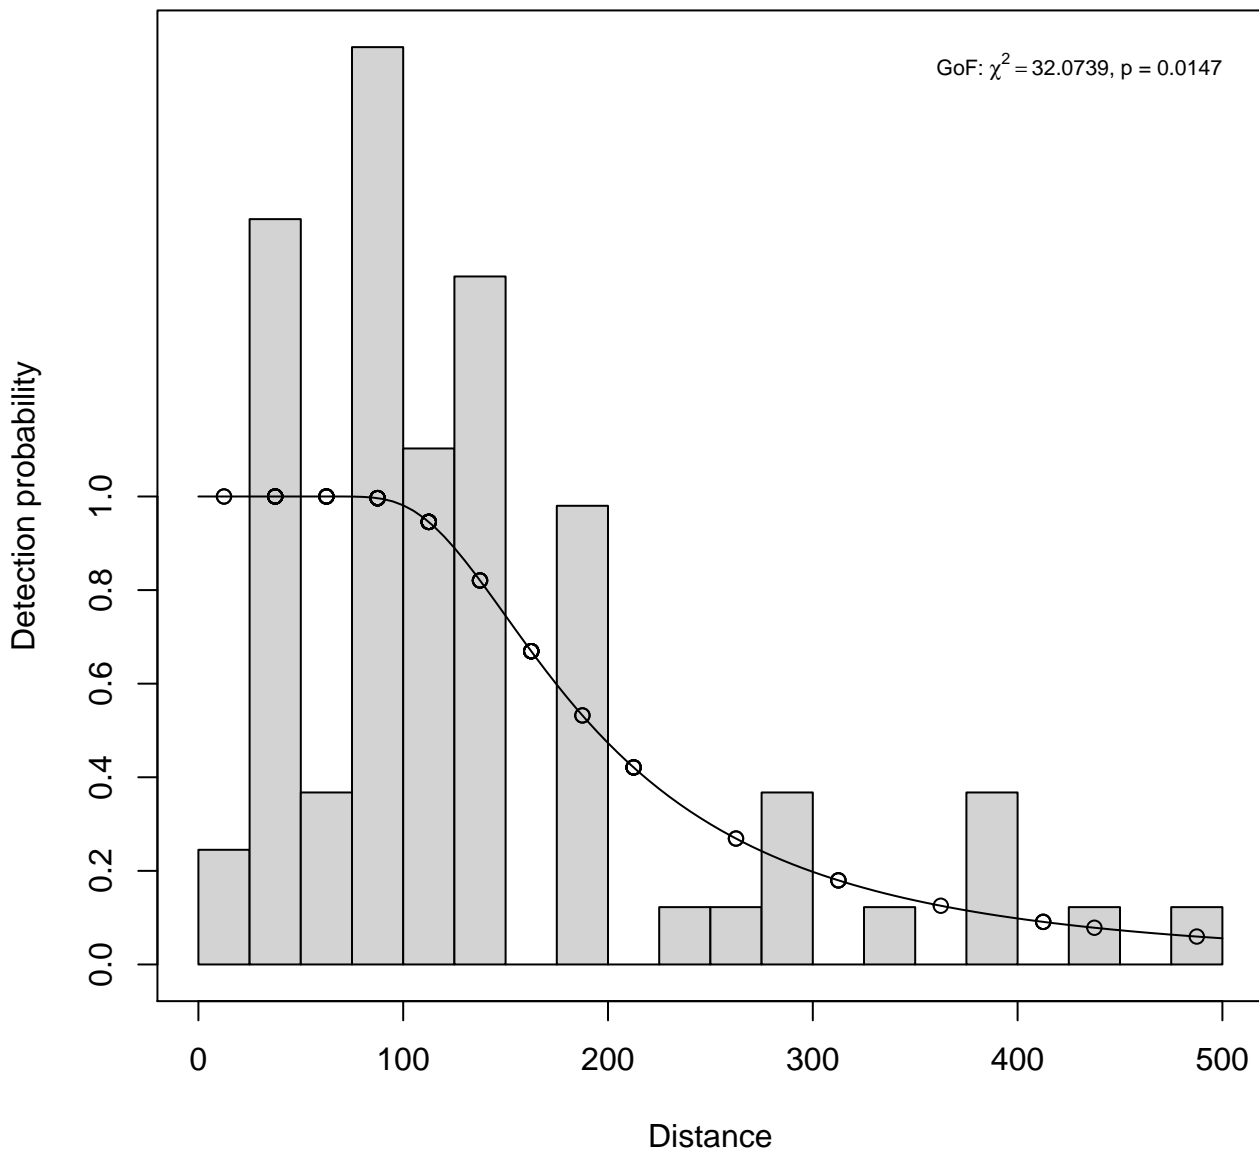

Supplement: s1 [file s1]
