# Supplementary material
Source: MDPI journal article supplement (https://www.mdpi.com/1424-2818/13/7/300)

**Eupsittula canicularis – Costa Rican seasonal moist forests – Costa Rica**

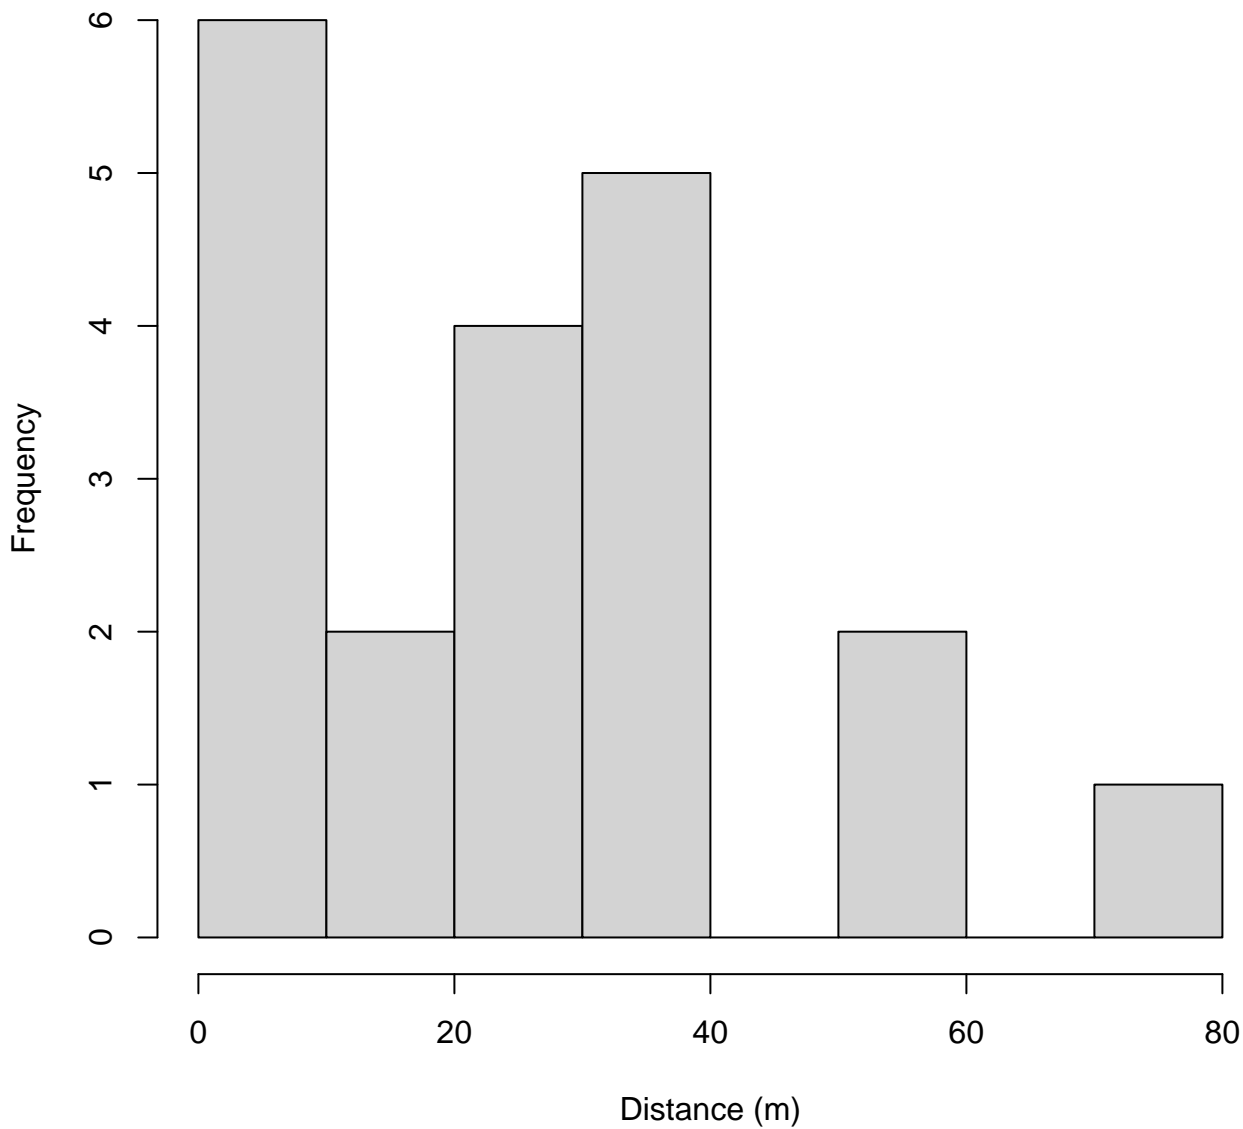

Eupsittula canicularis – Costa Rican seasonal moist forests – Costa Rica

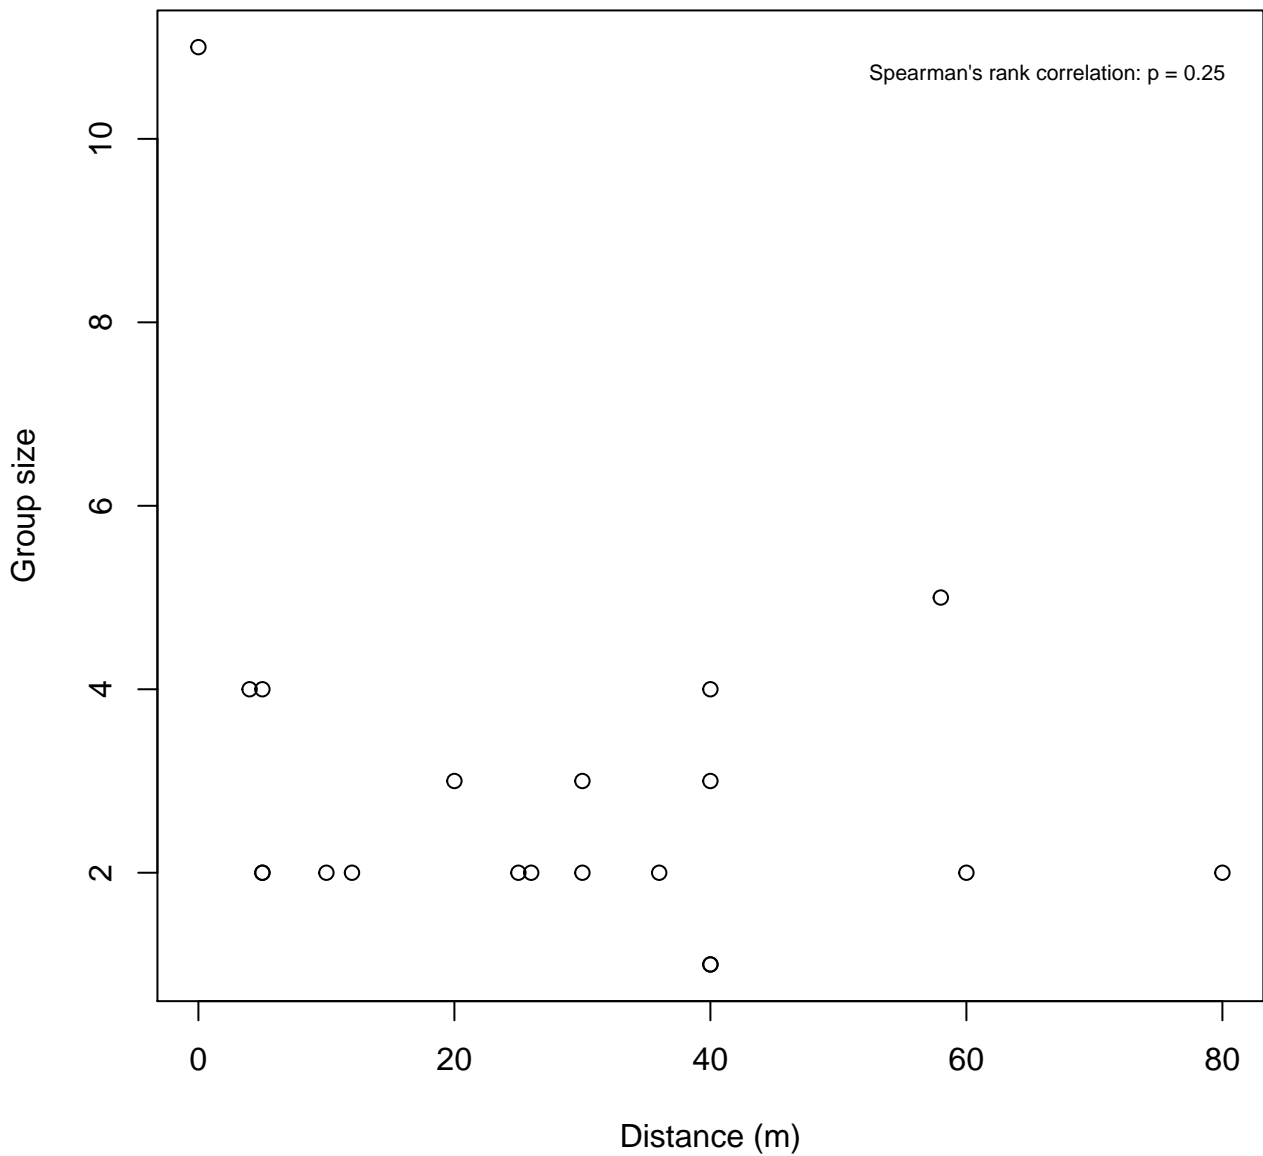

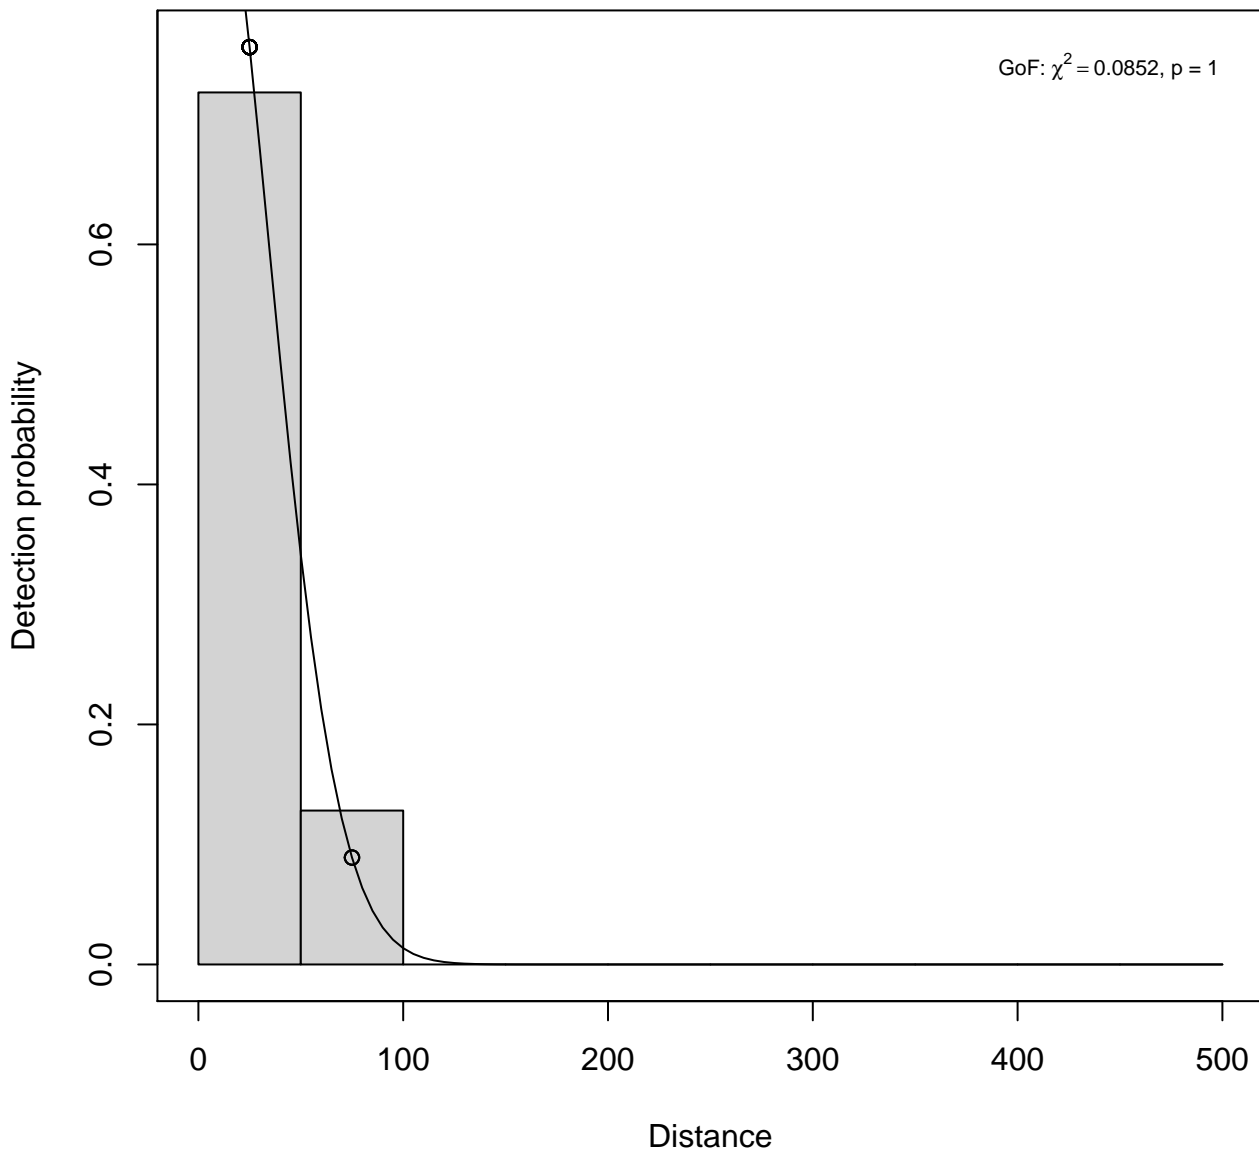

GoF:  $\chi^2 = \text{NA}$ , p = NA

*Eupsittula canicularis* – Costa Rican seasonal moist forests – Costa Rica (N = 20, key function = hn)

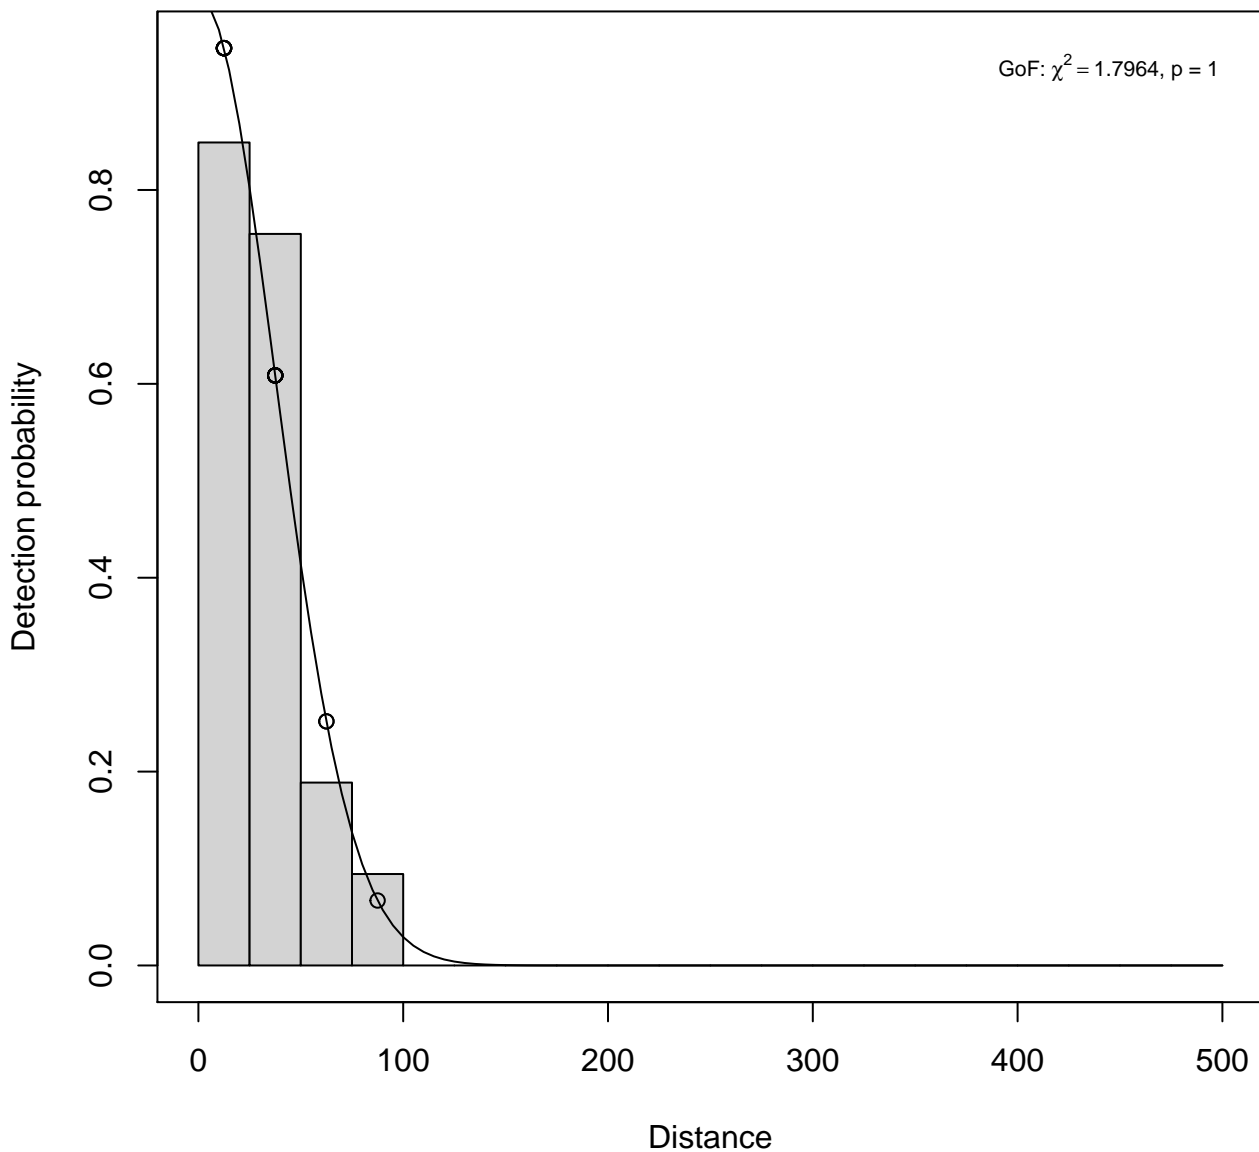

Supplement: s1 [file s1]
