# Supplementary material
Source: MDPI journal article supplement (https://www.mdpi.com/1424-2818/13/7/300)

# Ara ararauna – Beni savanna – Bolivia

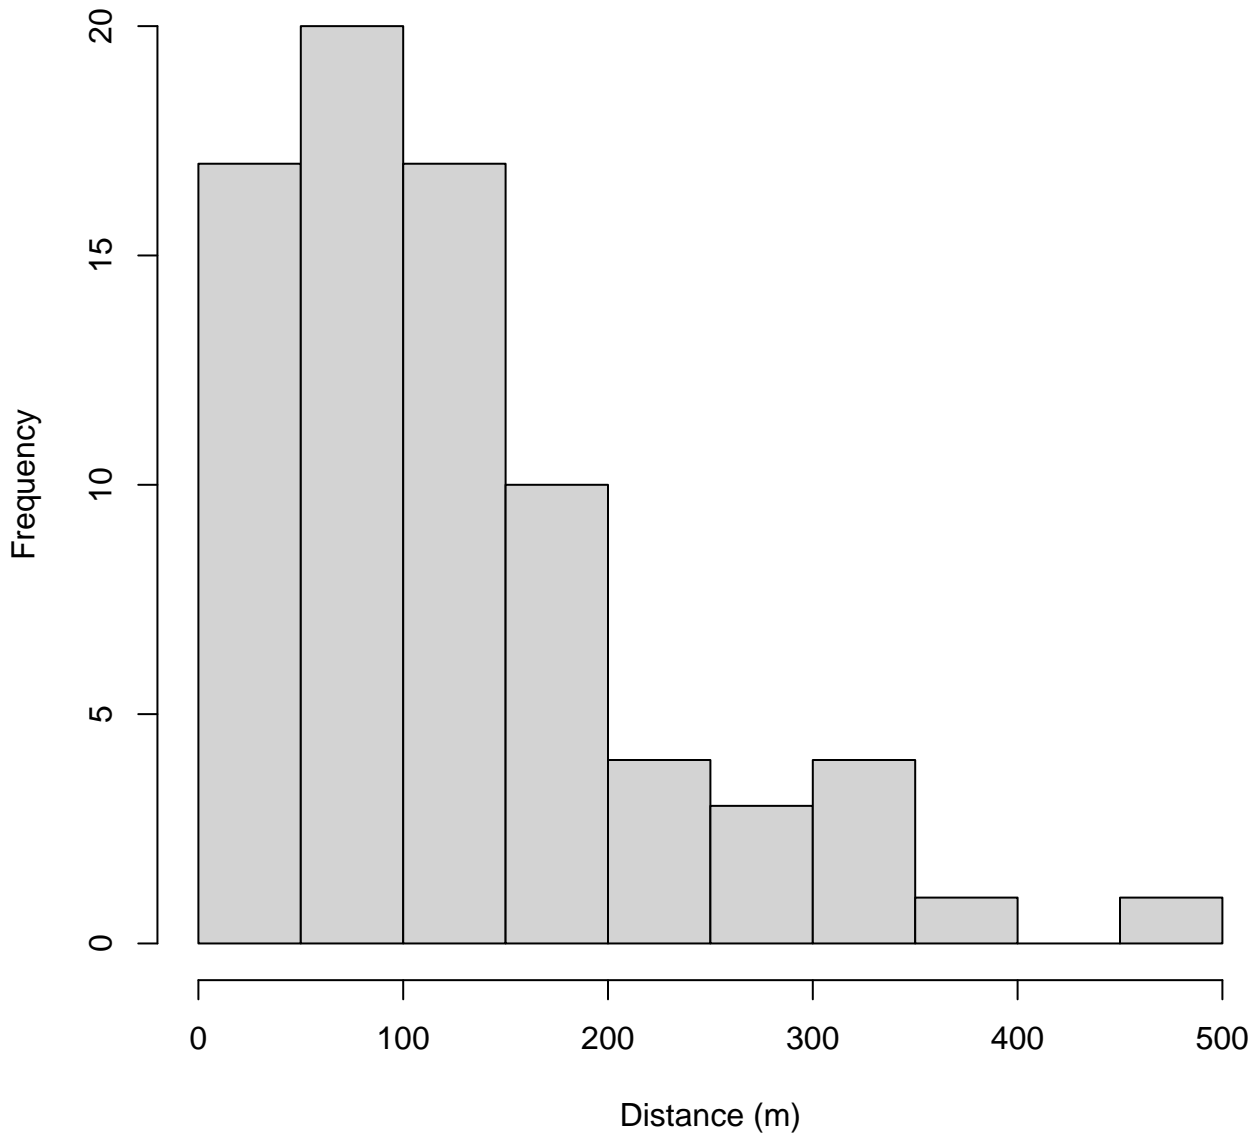

# Ara ararauna – Beni savanna – Bolivia

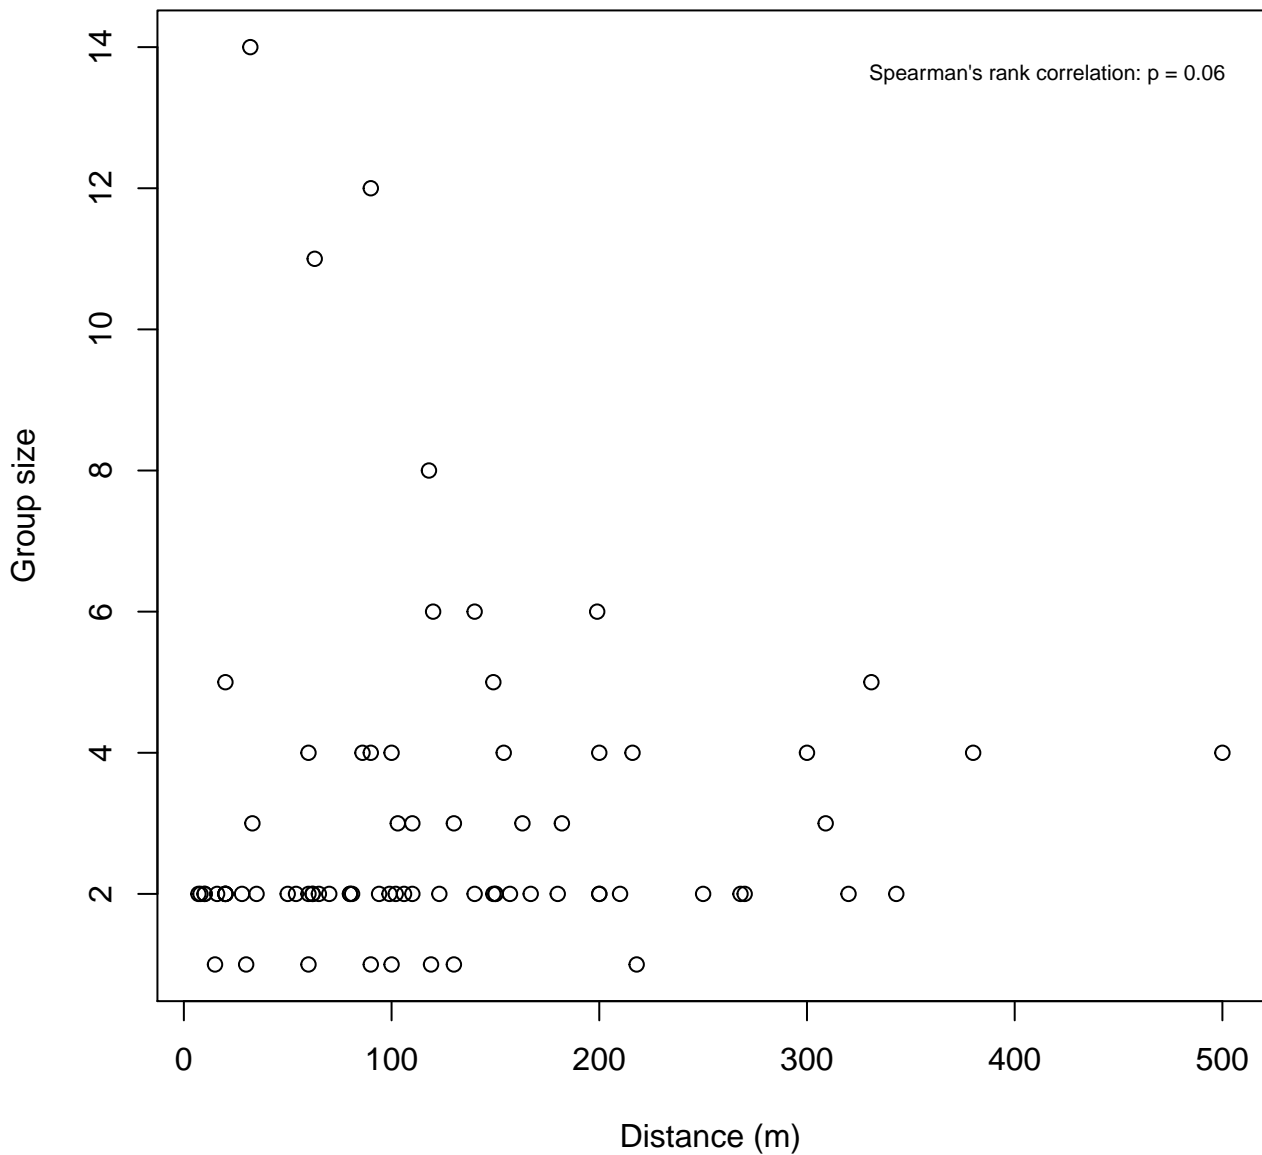

Ara ararauna – Beni savanna – Bolivia (N = 77, key function = hn)

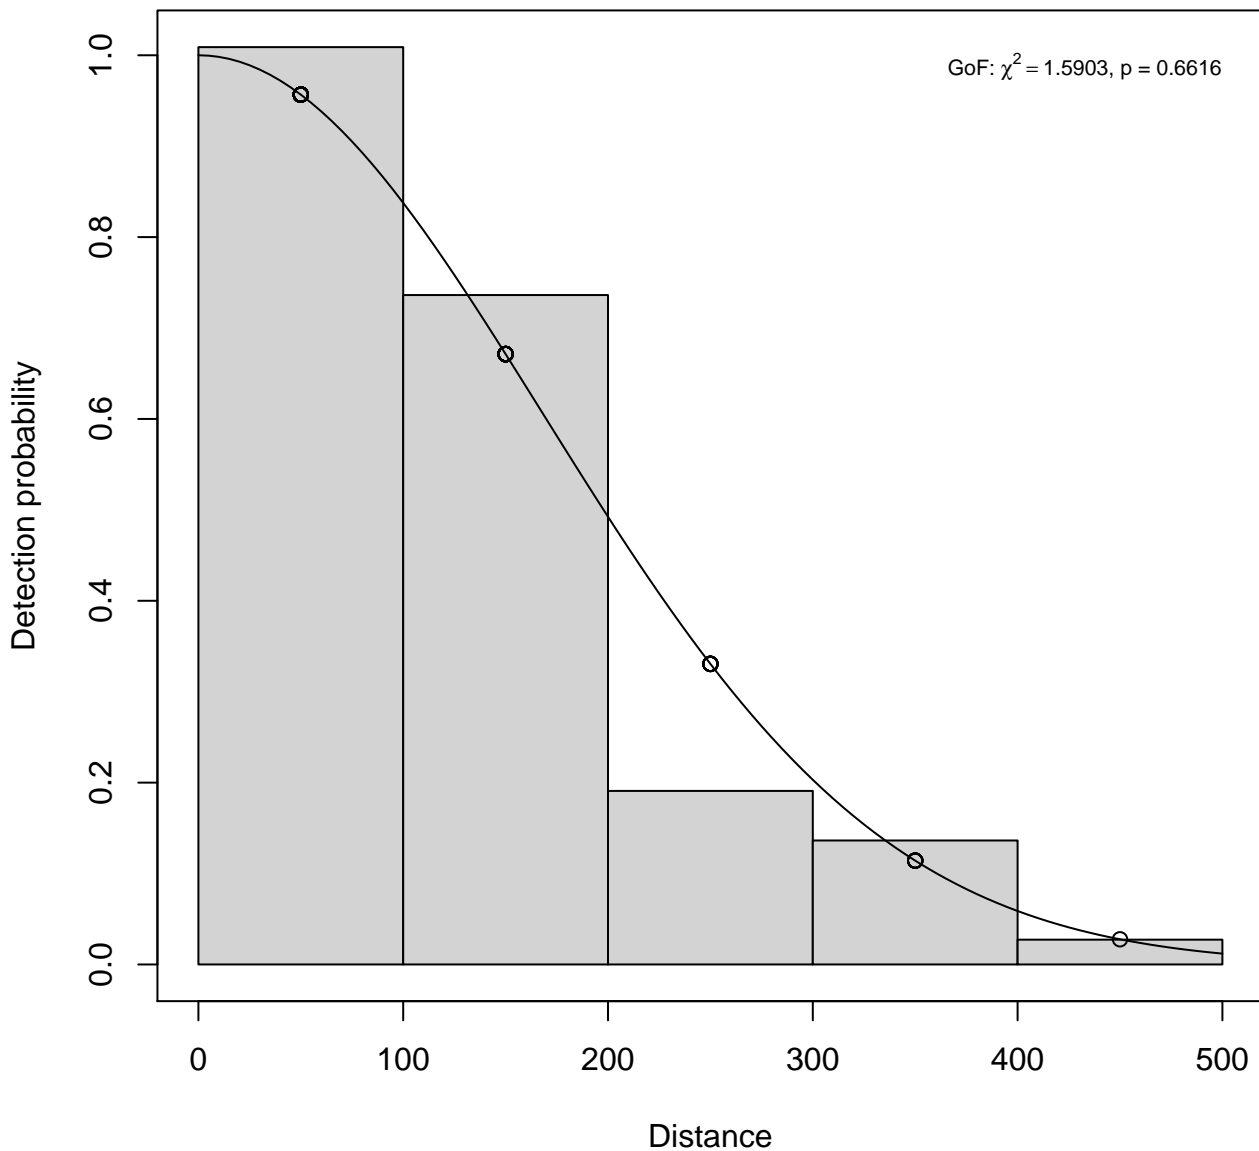

Ara ararauna – Beni savanna – Bolivia (N = 77, key function = hn)

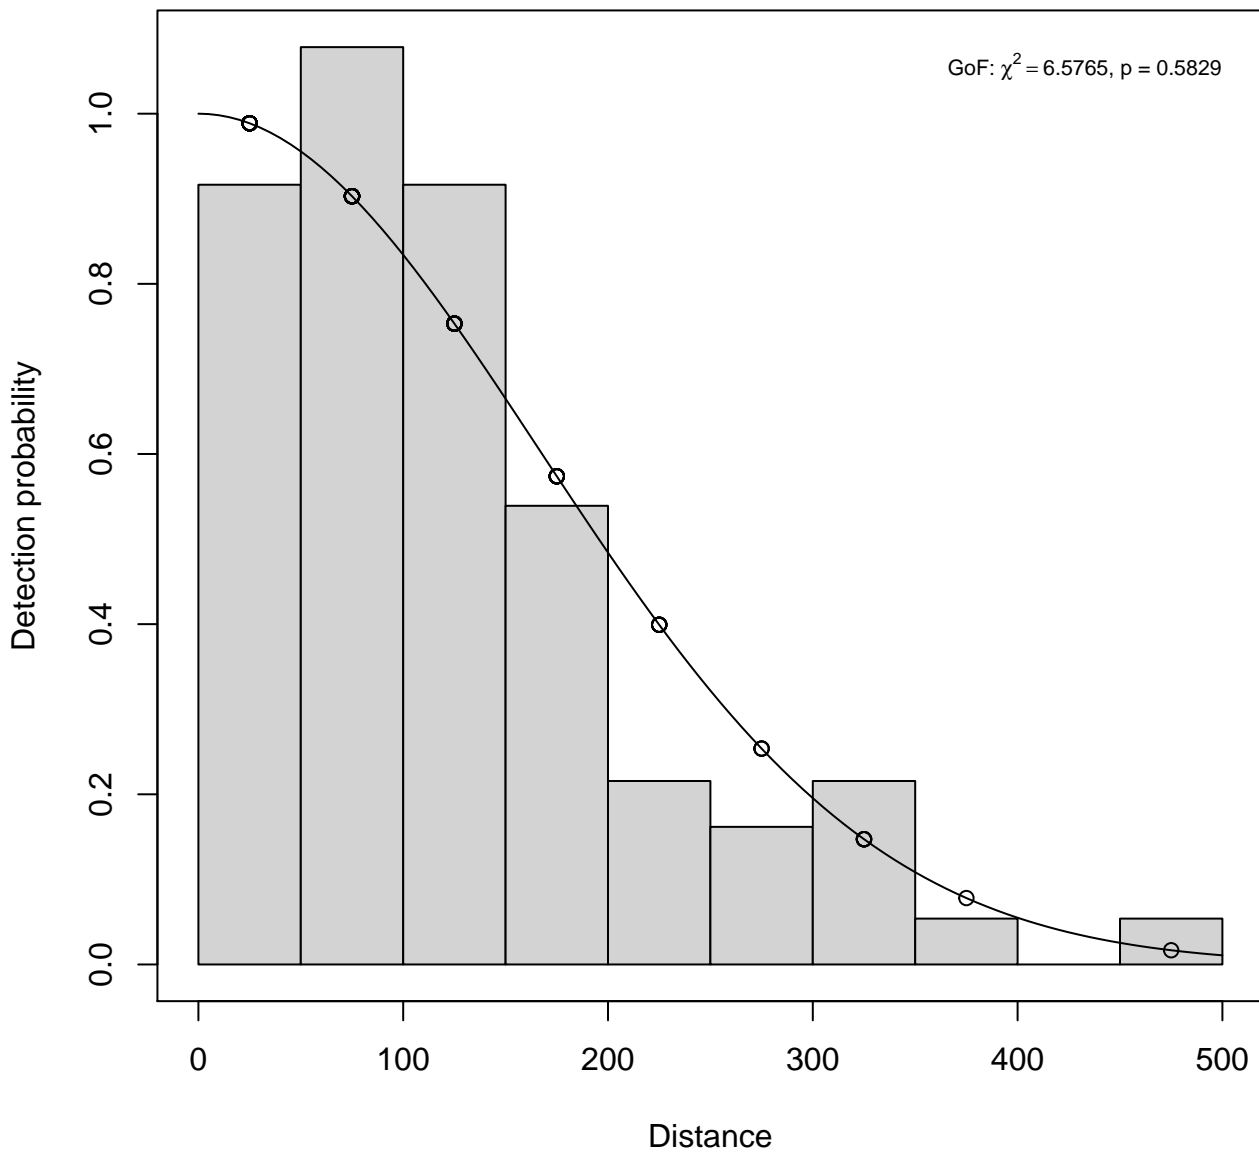

Ara ararauna – Beni savanna – Bolivia (N = 77, key function = hr)

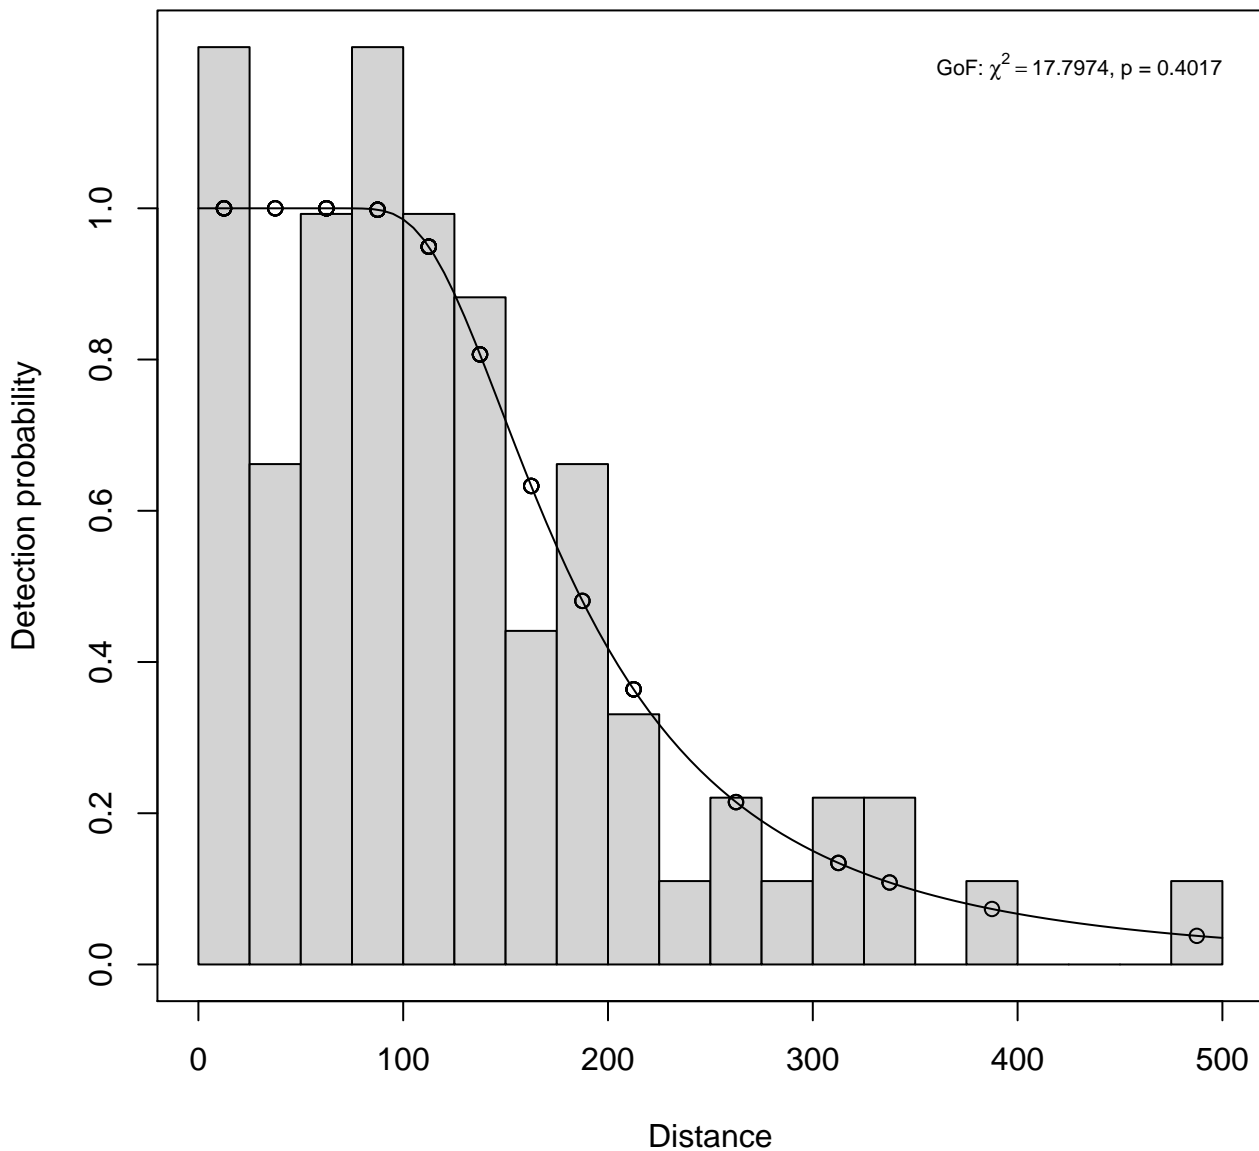

Supplement: s1 [file s1]
