# Supplementary material
Source: MDPI journal article supplement (https://www.mdpi.com/1424-2818/13/7/300)

# **Psittacara leucophthalmus – Southern Andean Yungas – Argentina**

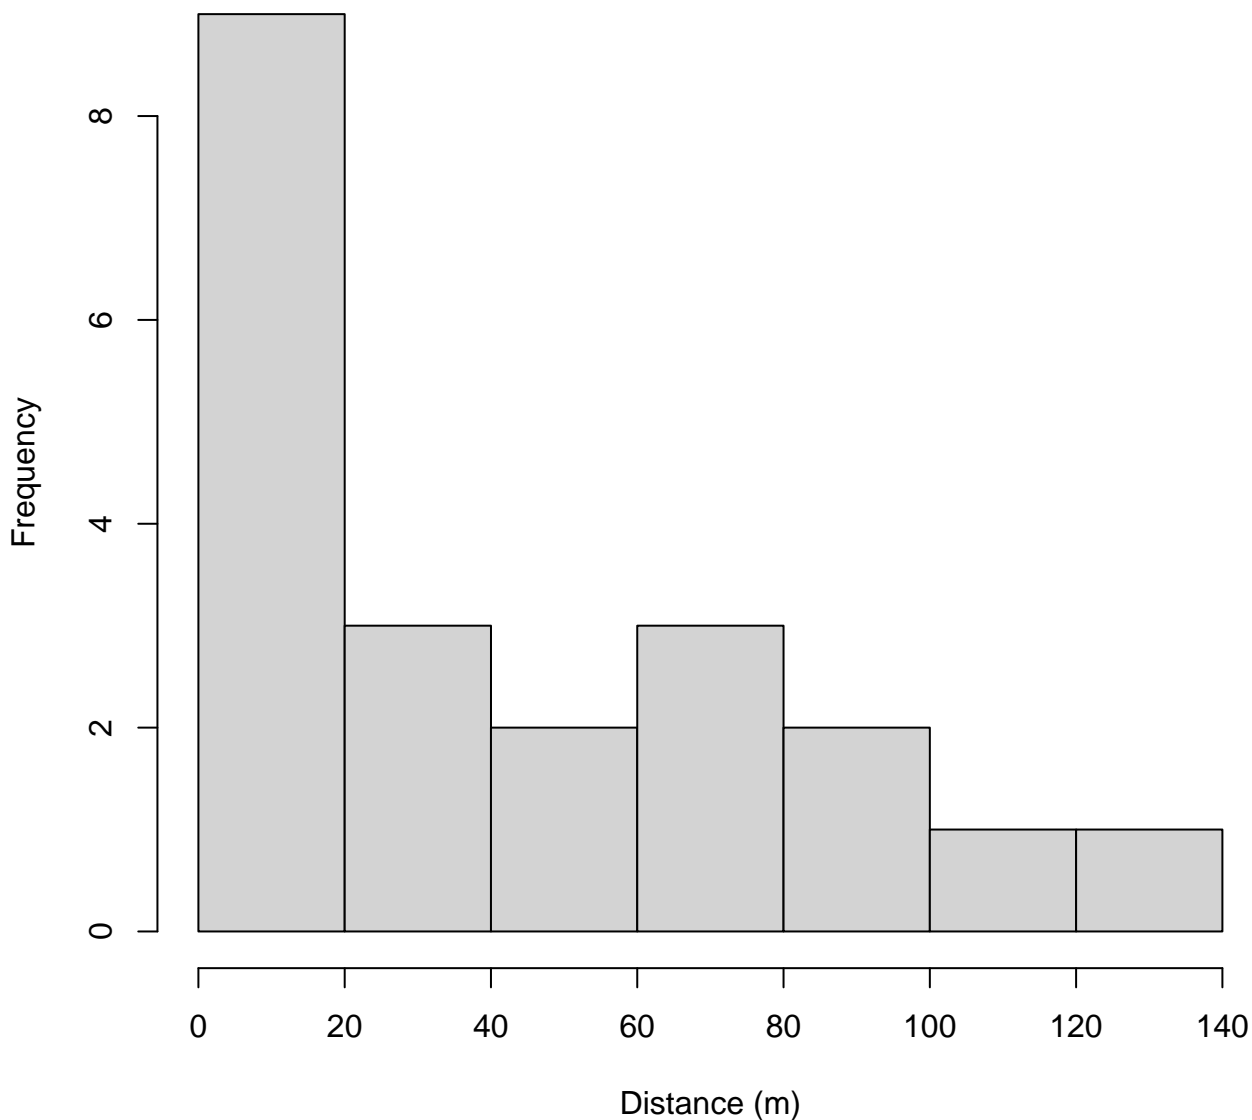

# Psittacara leucophthalmus – Southern Andean Yungas – Argentina

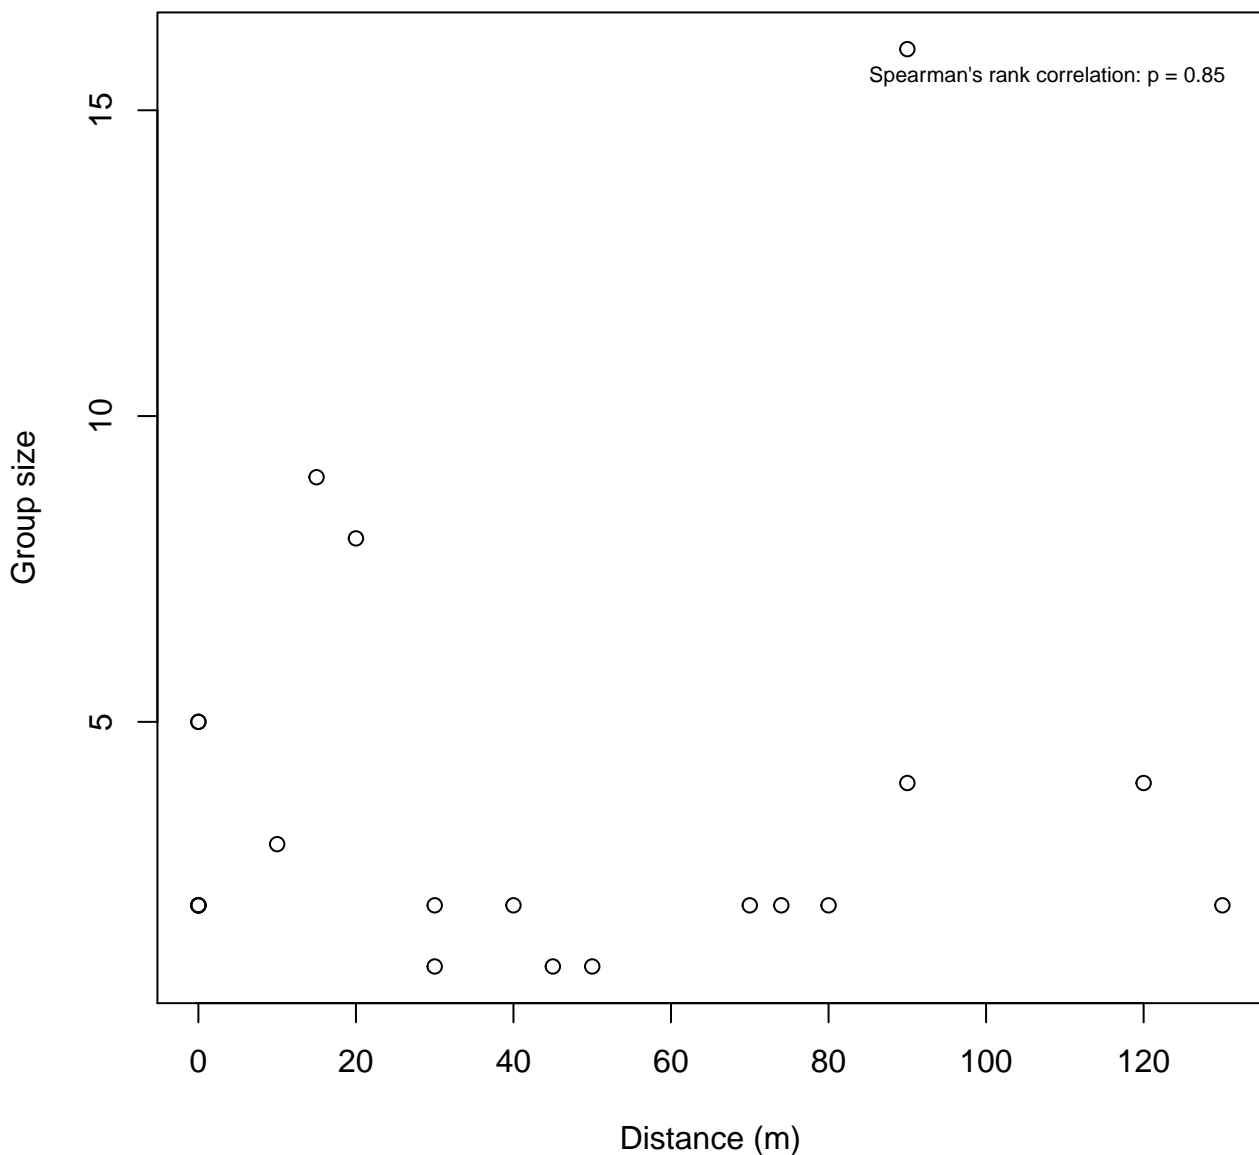

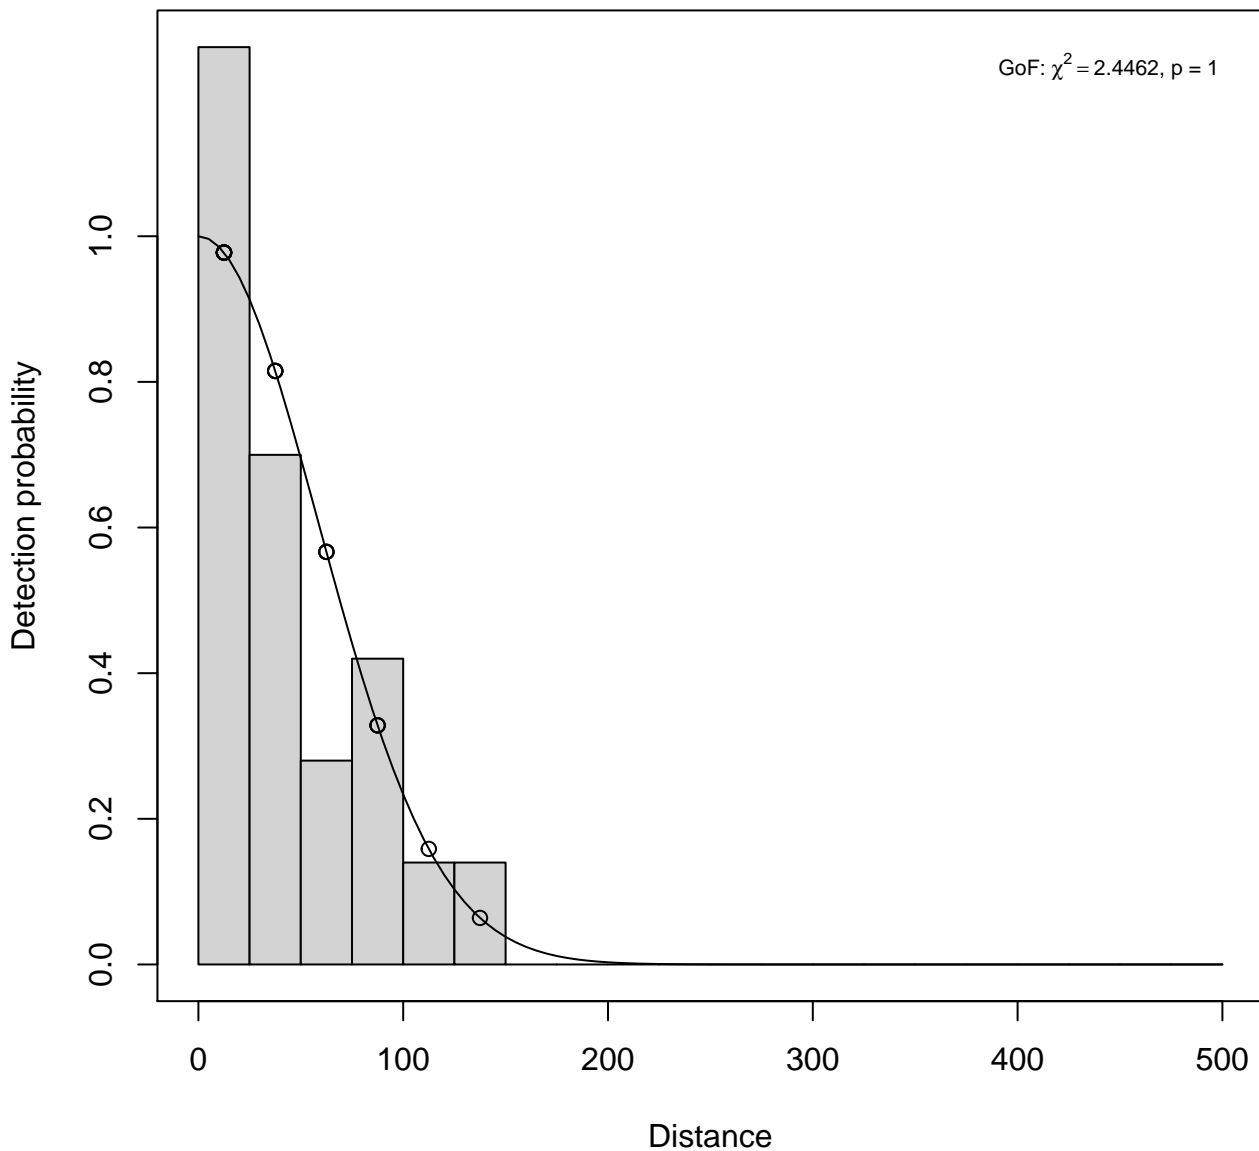

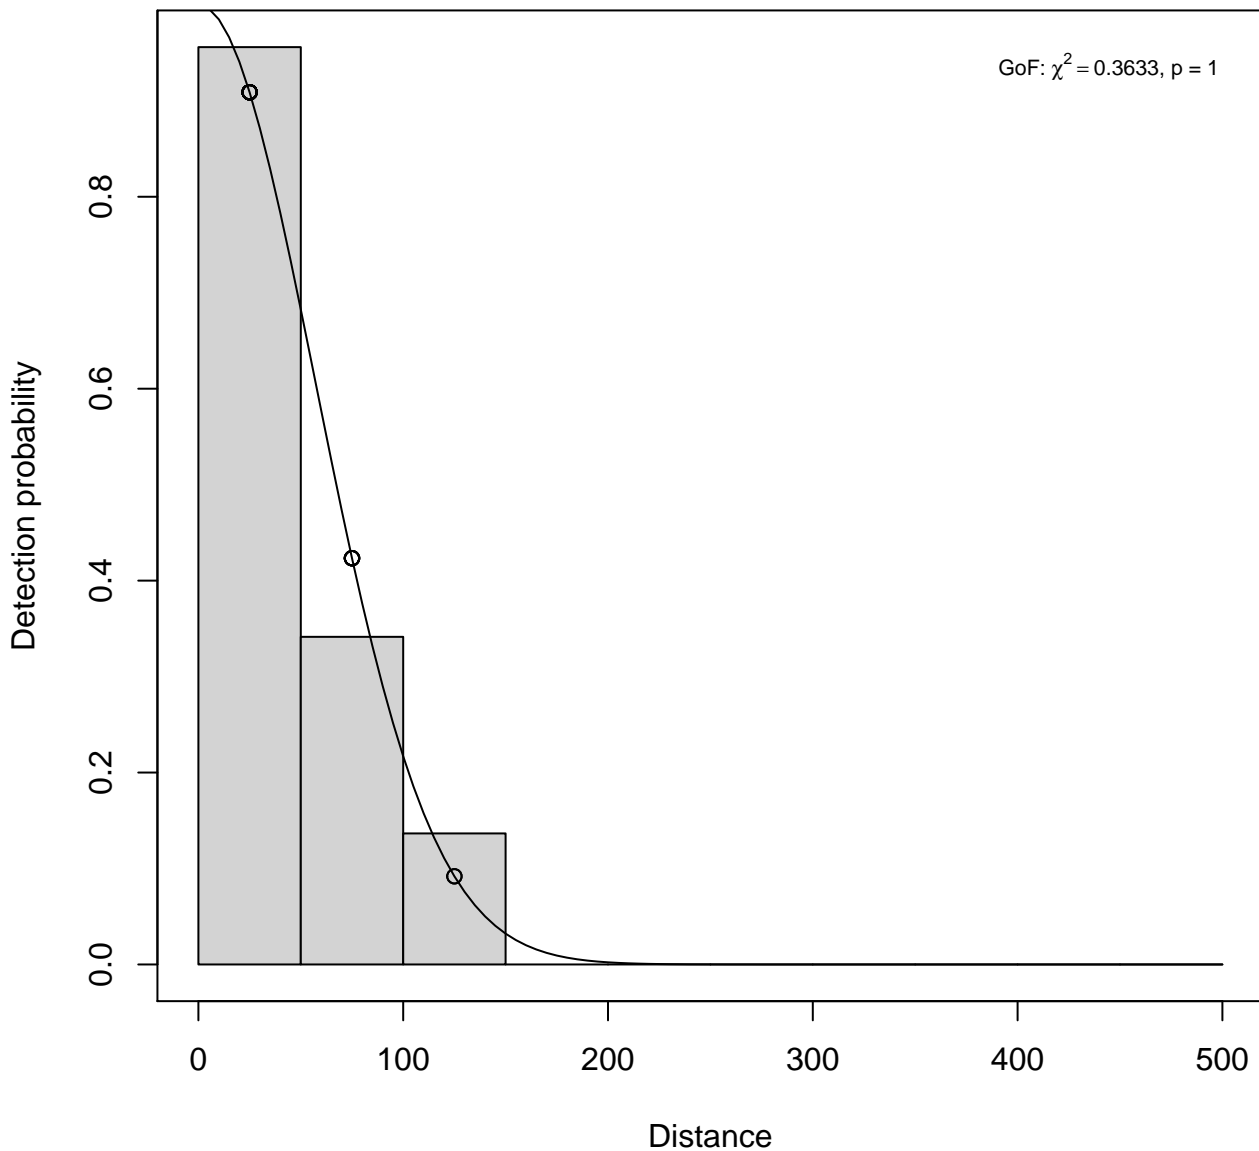

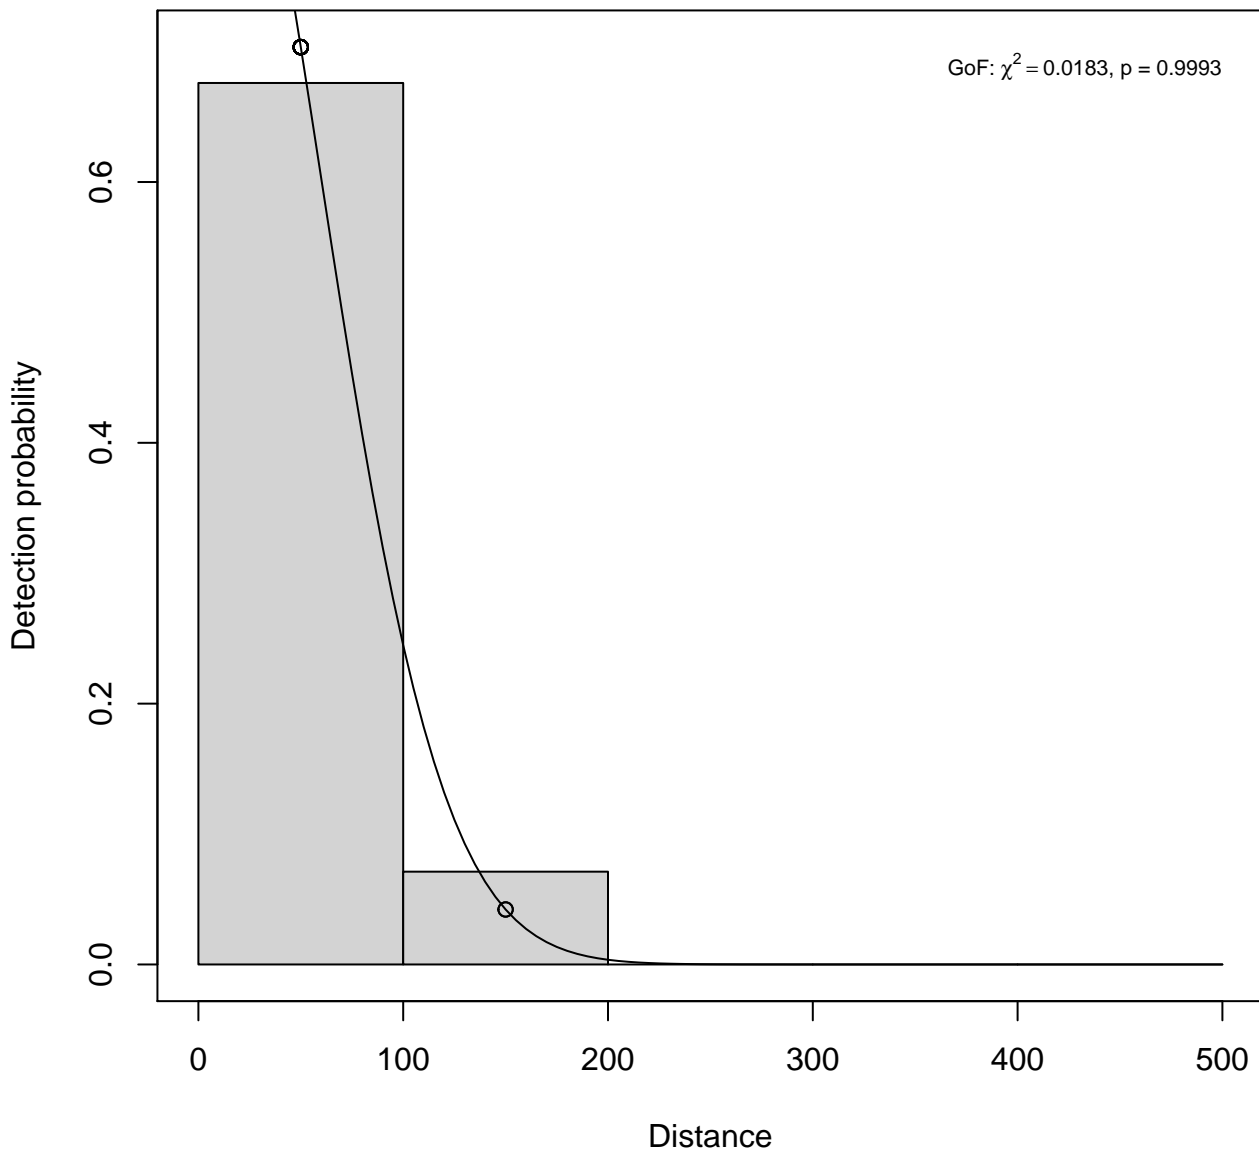

Supplement: s1 [file s1]
