# Supplementary material
Source: MDPI journal article supplement (https://www.mdpi.com/1424-2818/13/7/300)

# Brotoyeris jugularis – Isthmian–Pacific moist forests – Panama

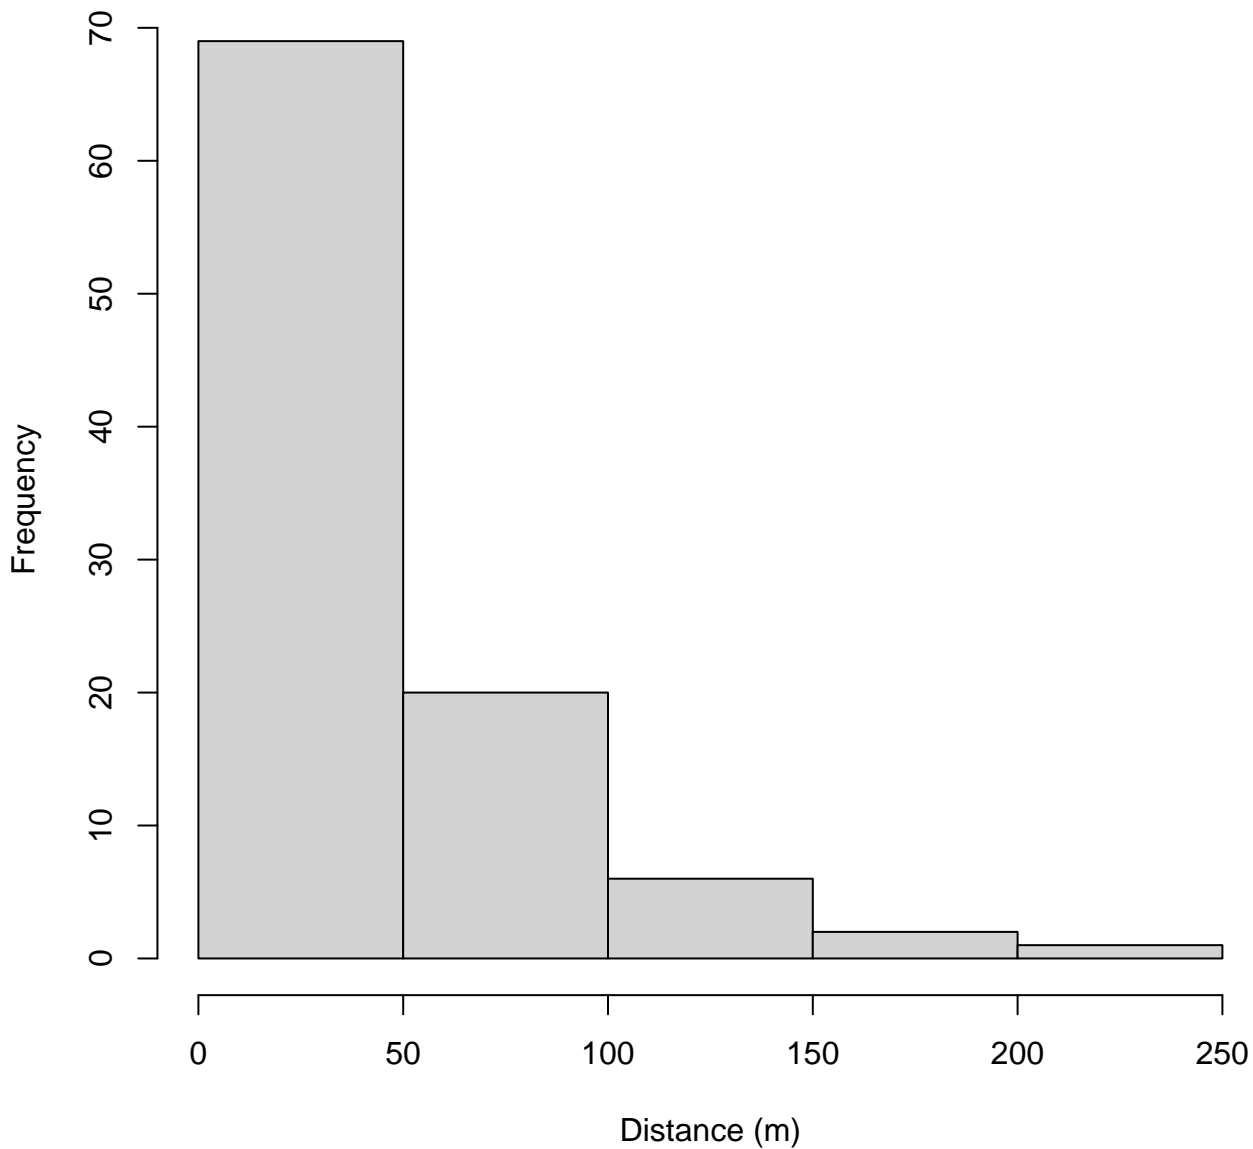

# Brotogetis jugularis – Isthmian–Pacific moist forests – Panama

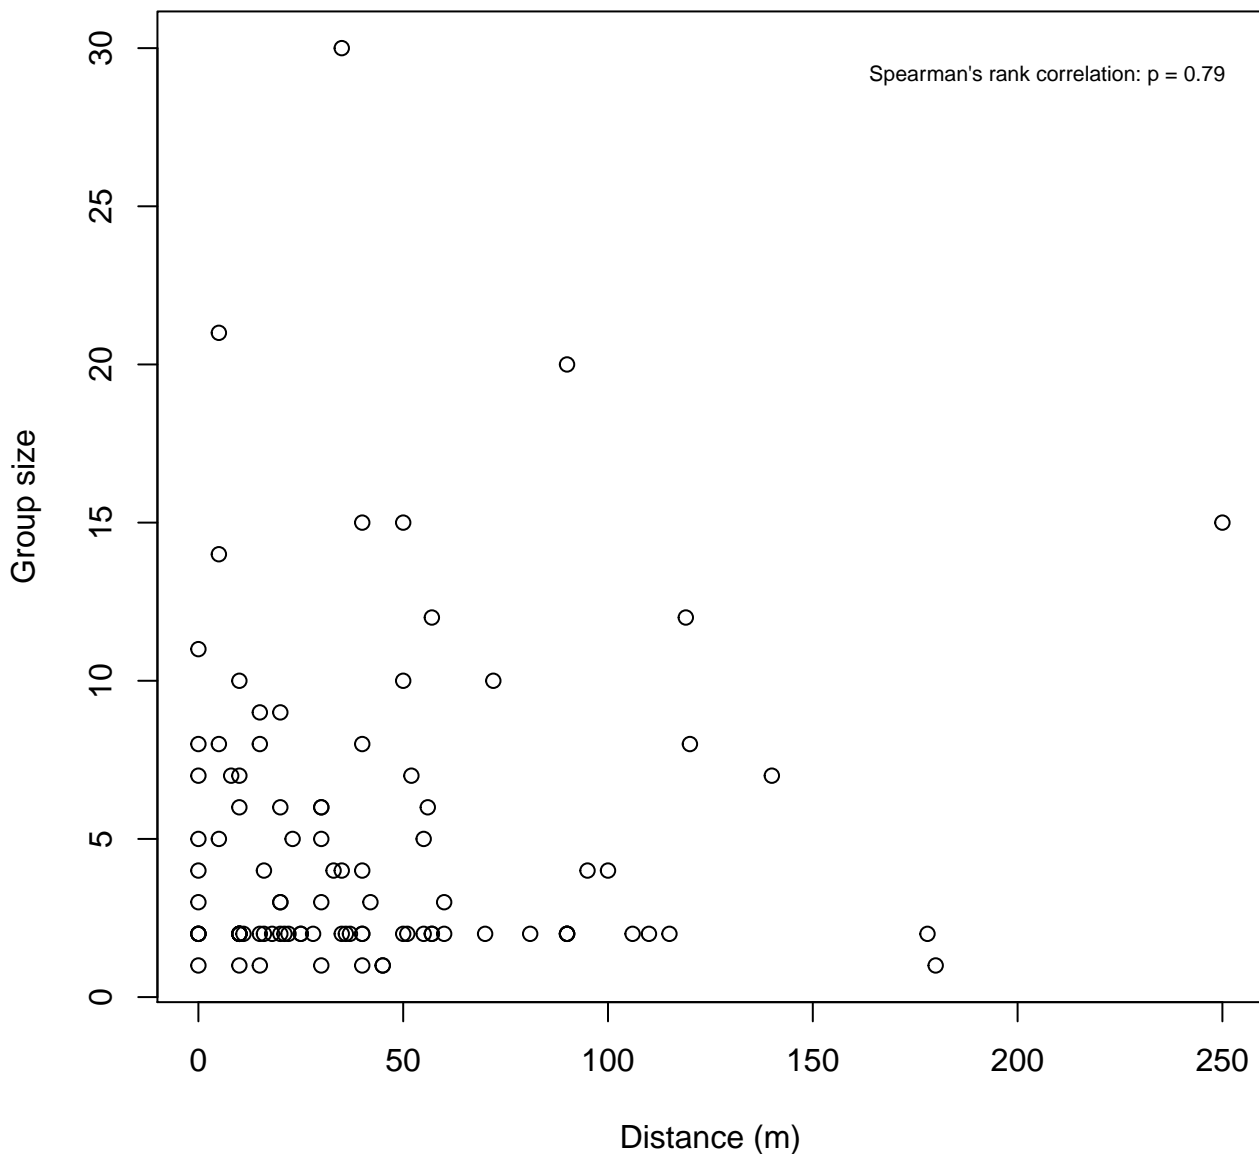

Brotogetis jugularis – Isthmian–Pacific moist forests – Panama (N = 98, key function = hr)

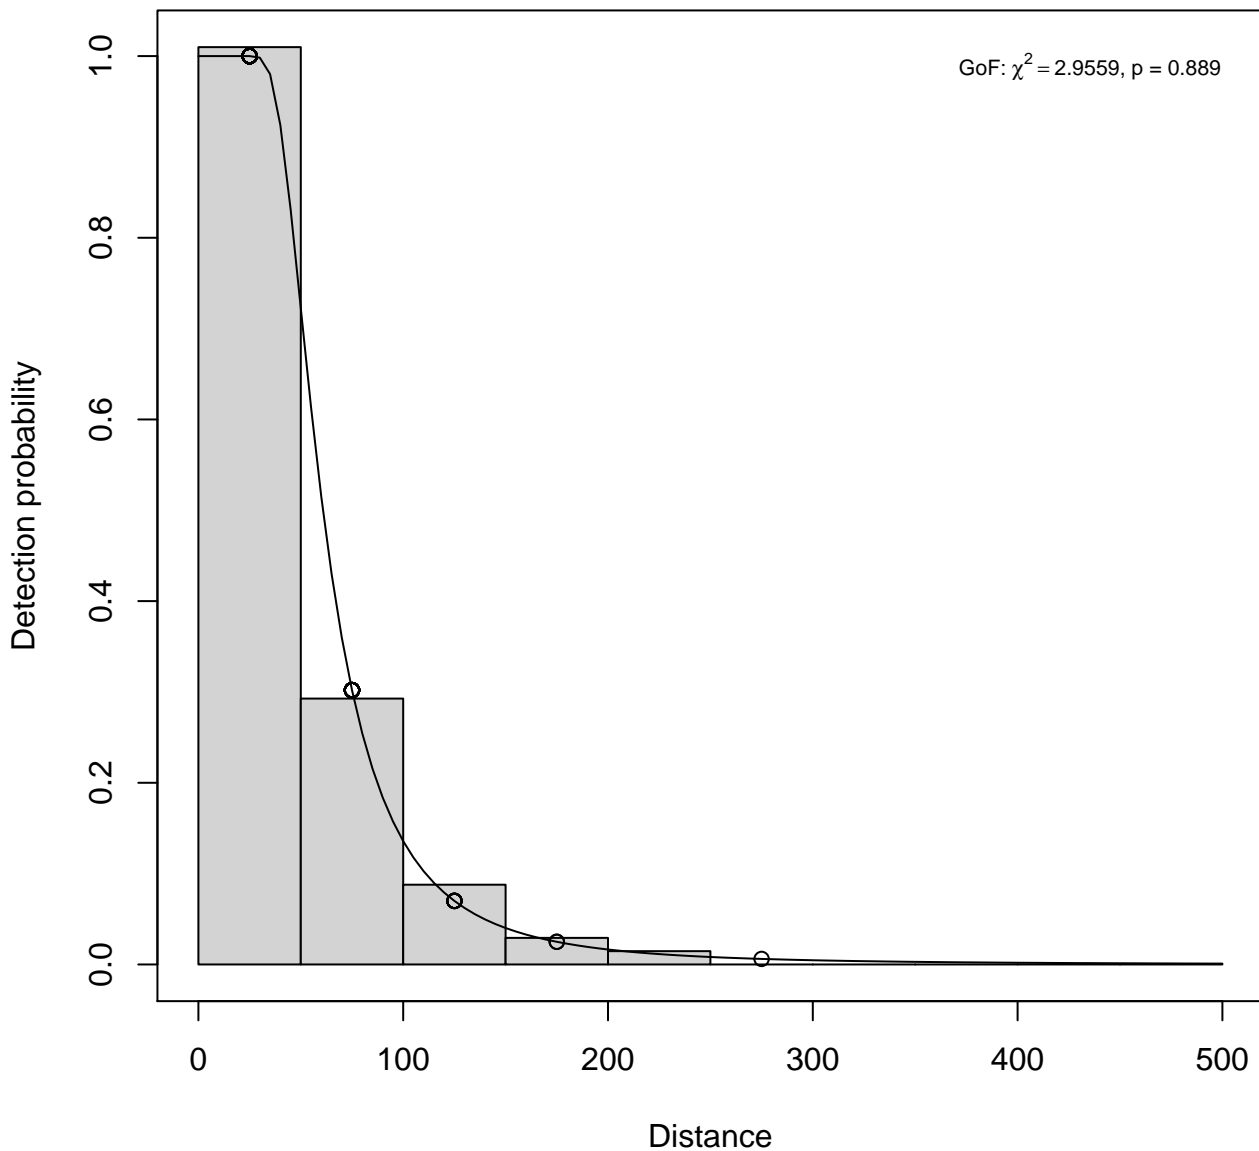

Brotozeris jugularis – Isthmian–Pacific moist forests – Panama (N = 98, key function = hr)

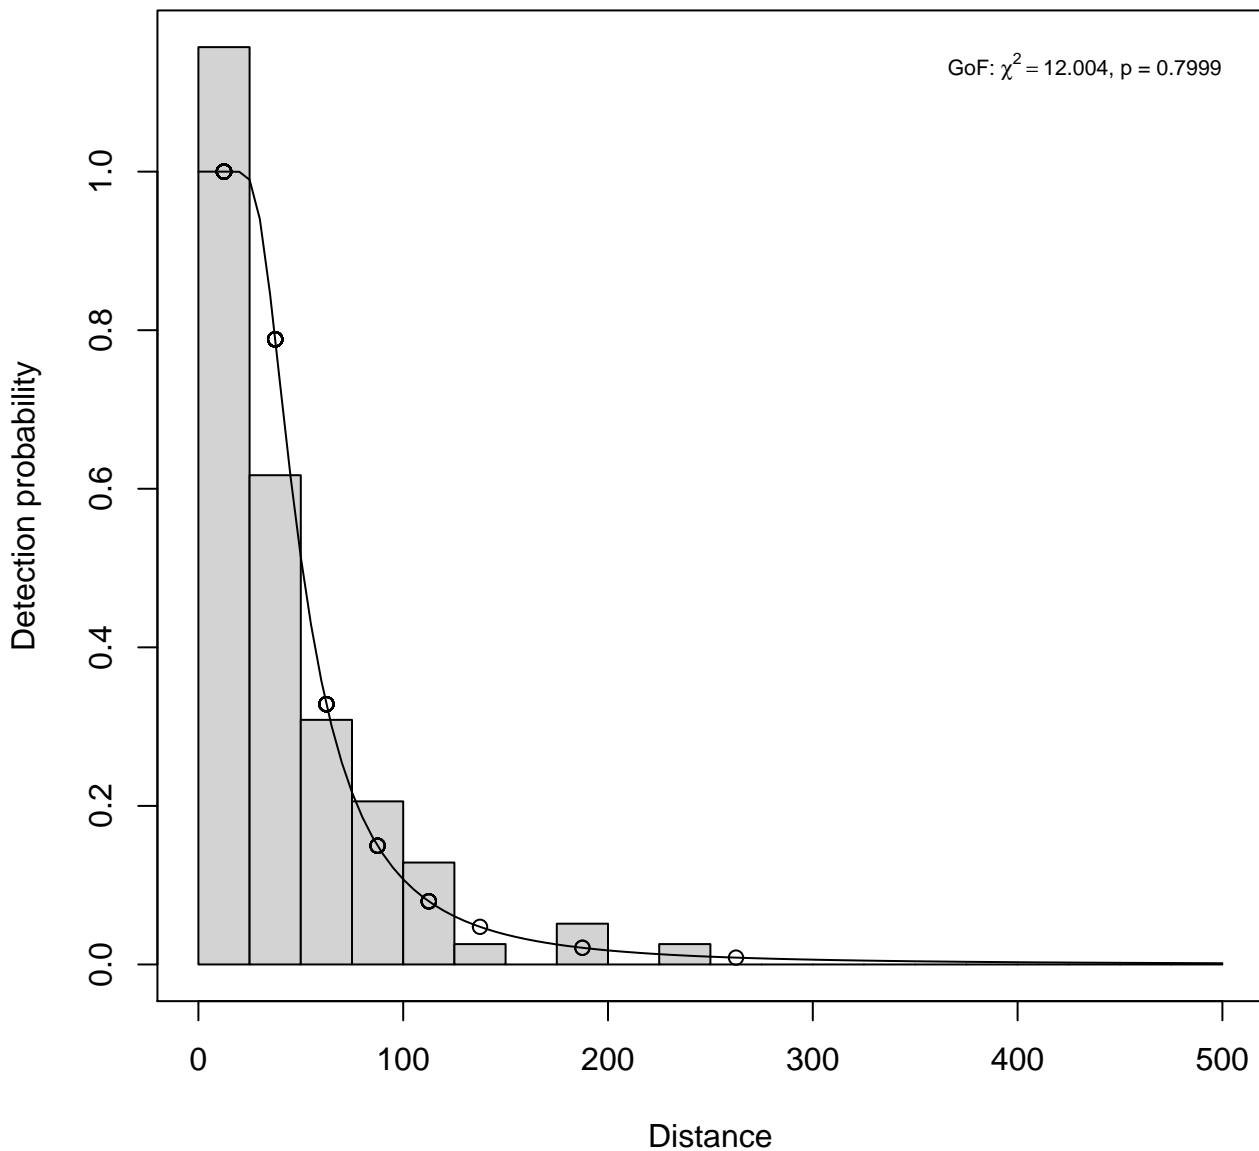

*Brotogetis jugularis* – Isthmian–Pacific moist forests – Panama (N = 98, key function = hn)

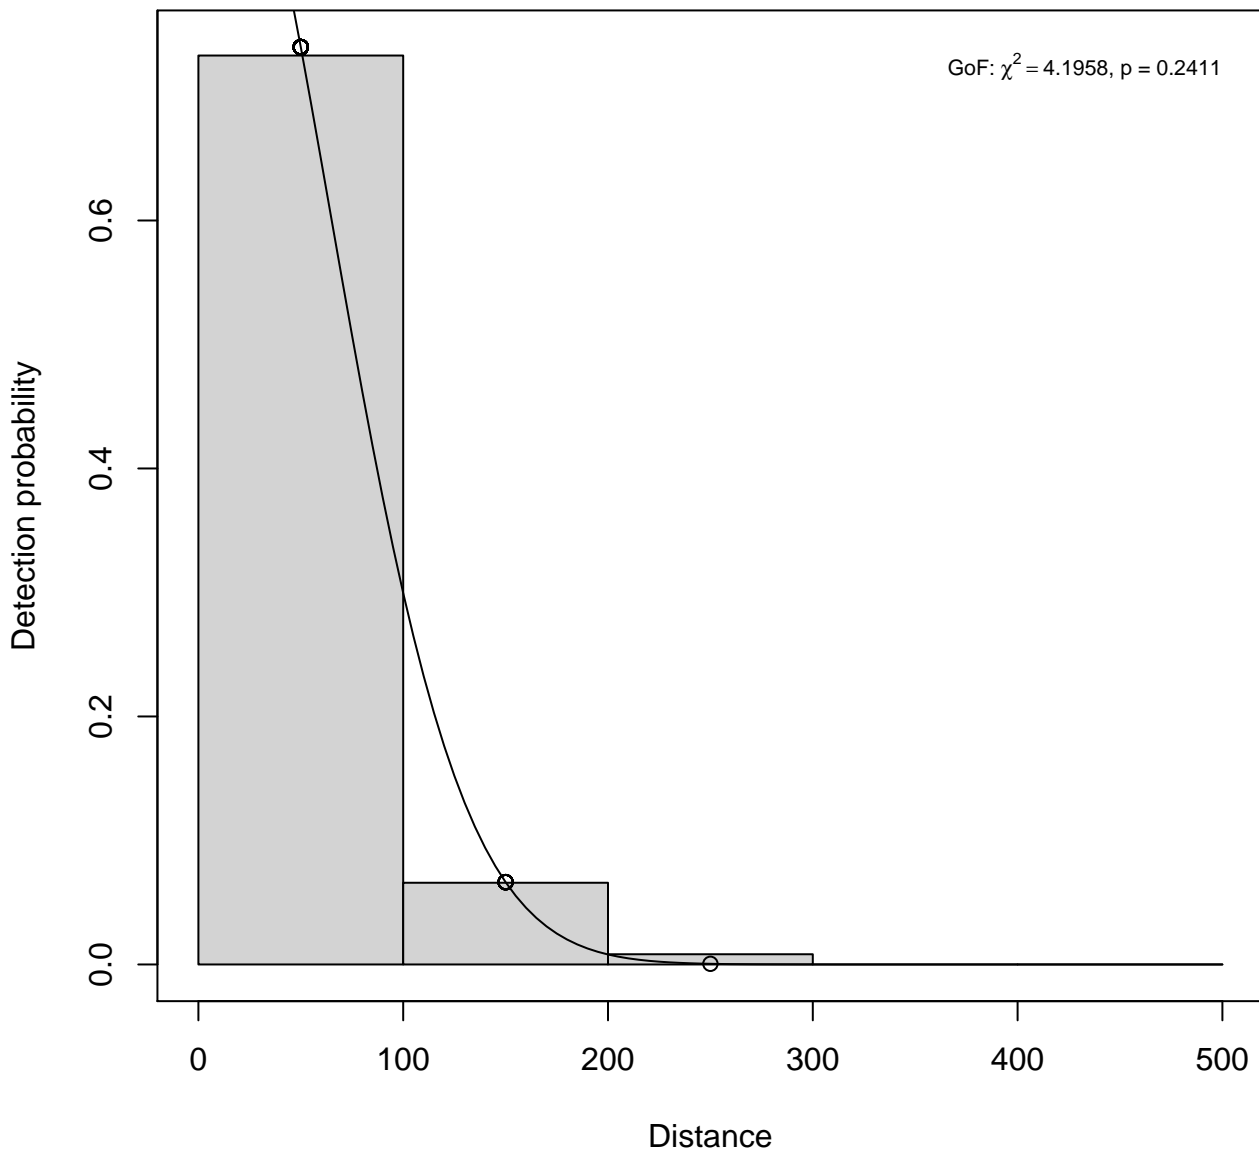

Supplement: s1 [file s1]
