# Supplementary material
Source: MDPI journal article supplement (https://www.mdpi.com/1424-2818/13/7/300)

**Brotogetis jugularis – Southern Mesoamerican Pacific mangroves – Panama**

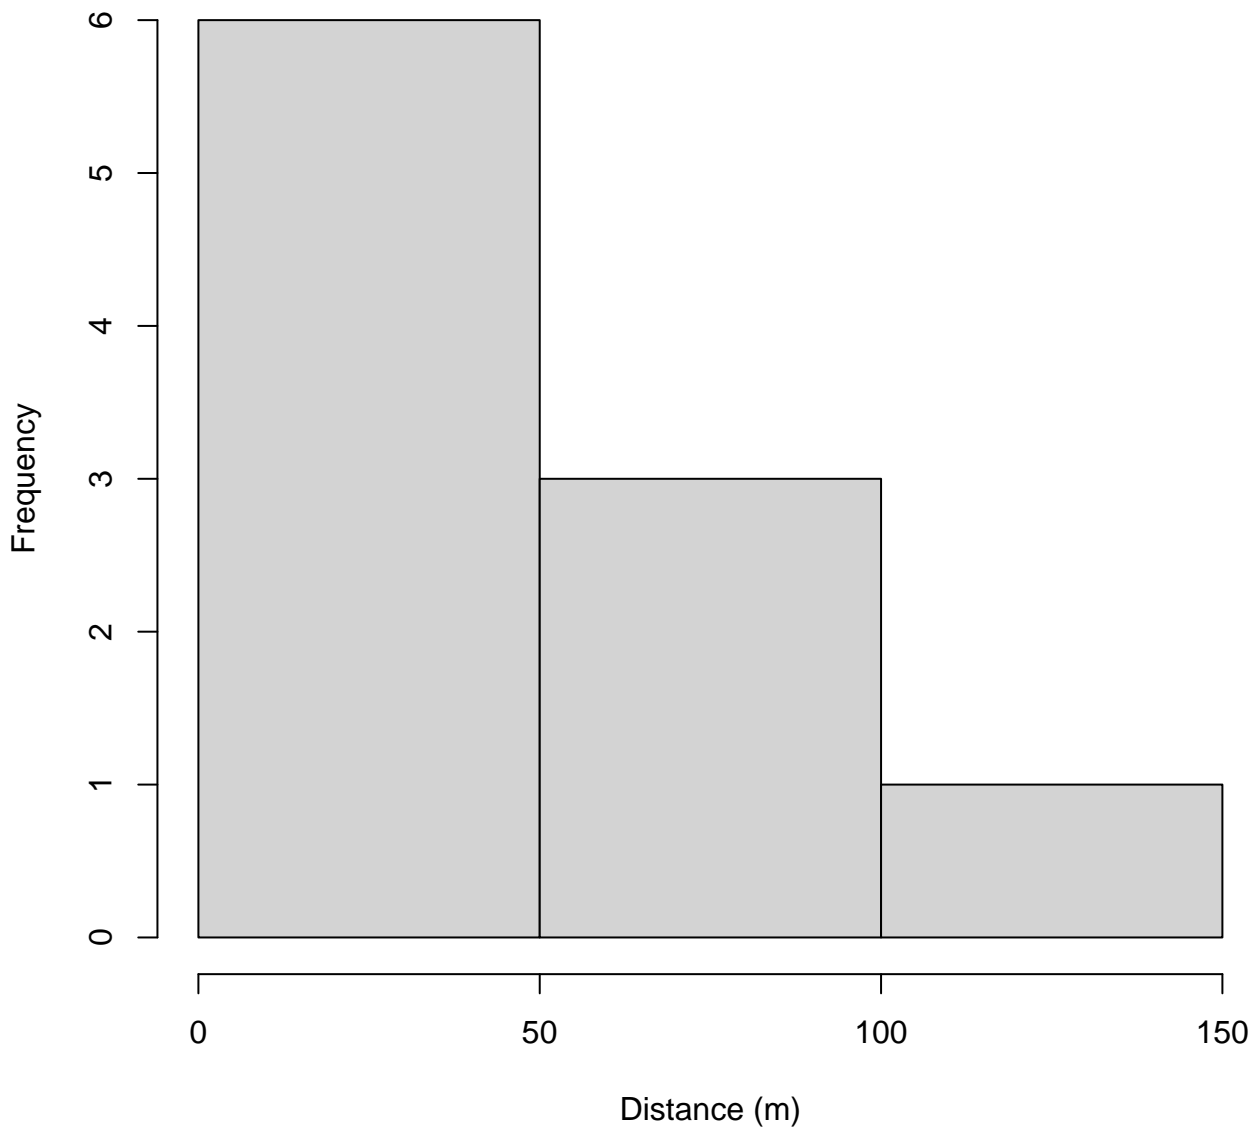

**Brotogetis jugularis – Southern Mesoamerican Pacific mangroves – Panam**

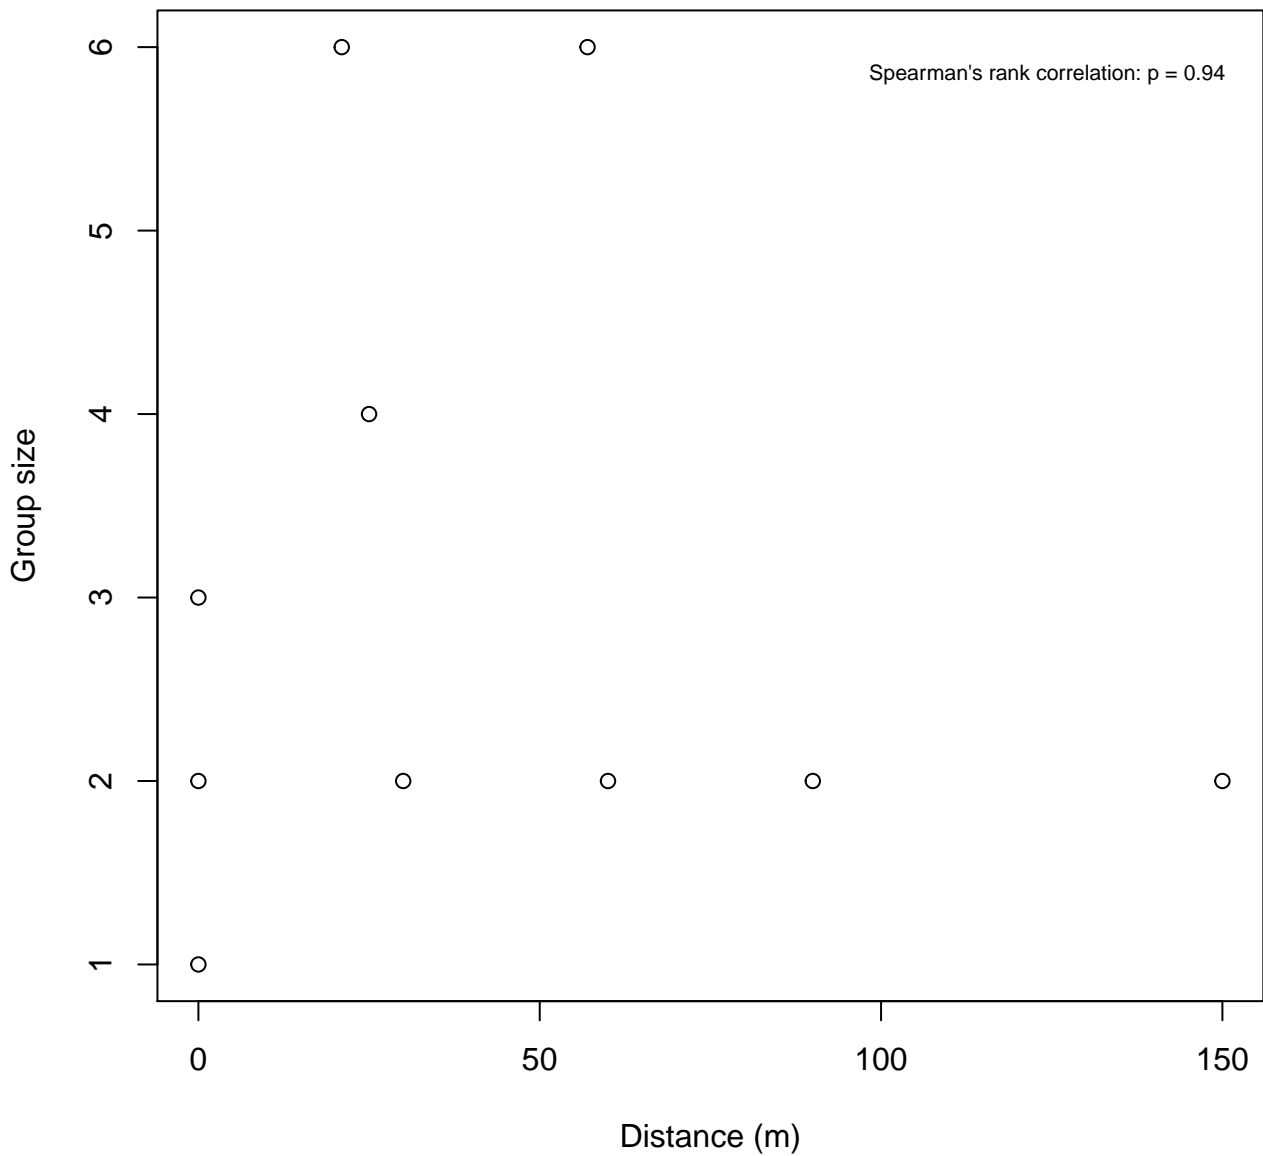

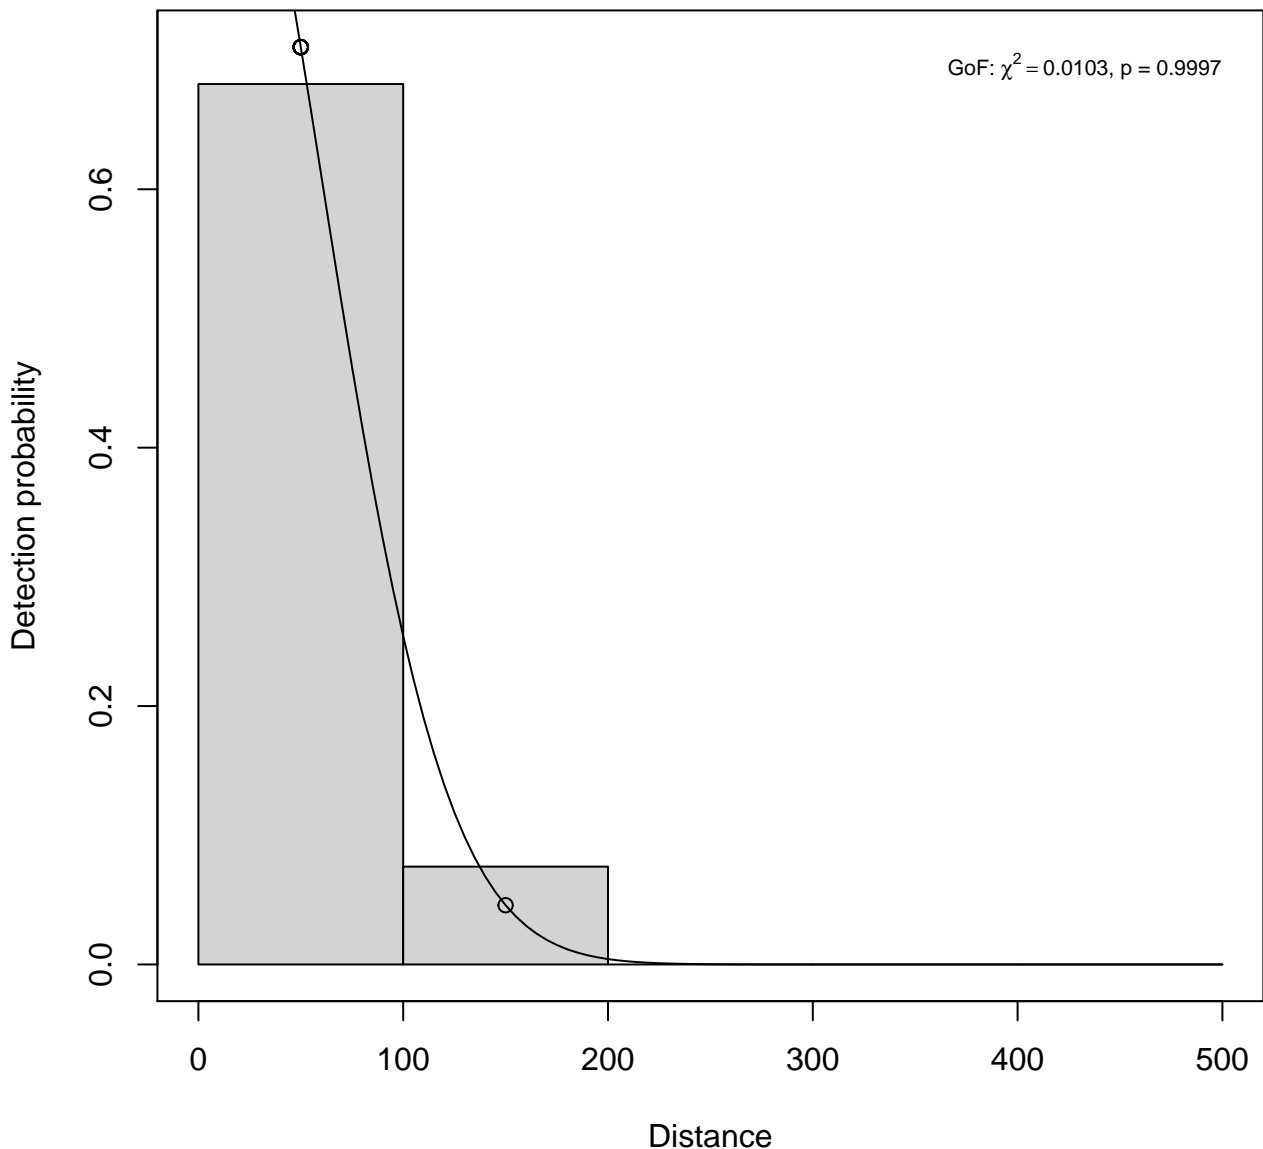

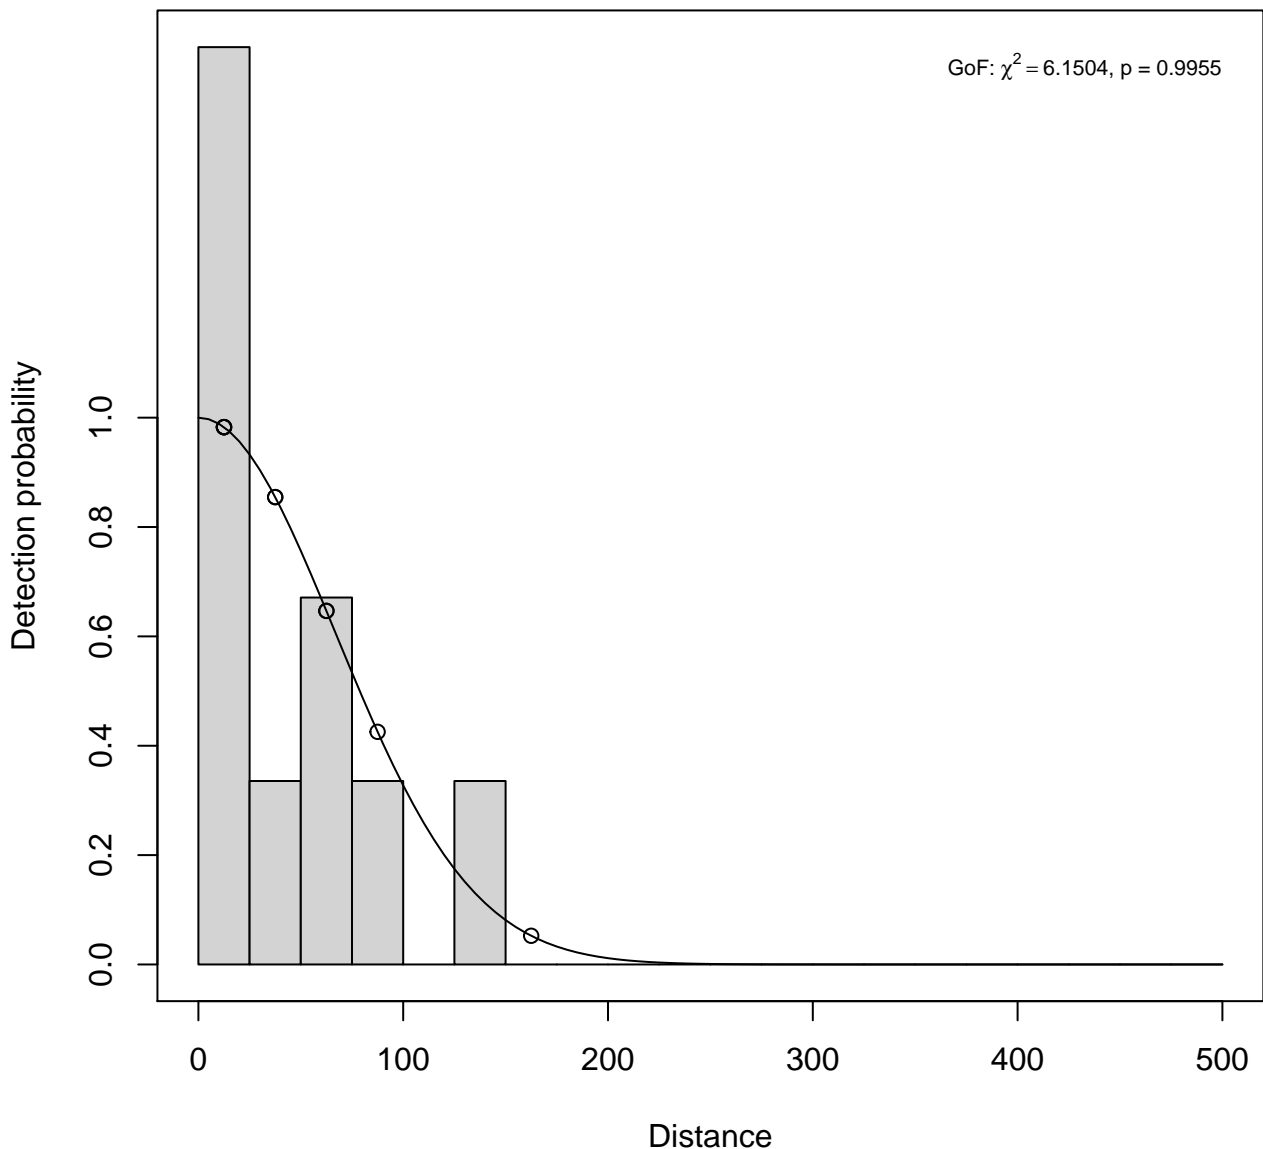

Brotogetis jugularis – Southern Mesoamerican Pacific mangroves – Panama (N = 10, key function = hn)

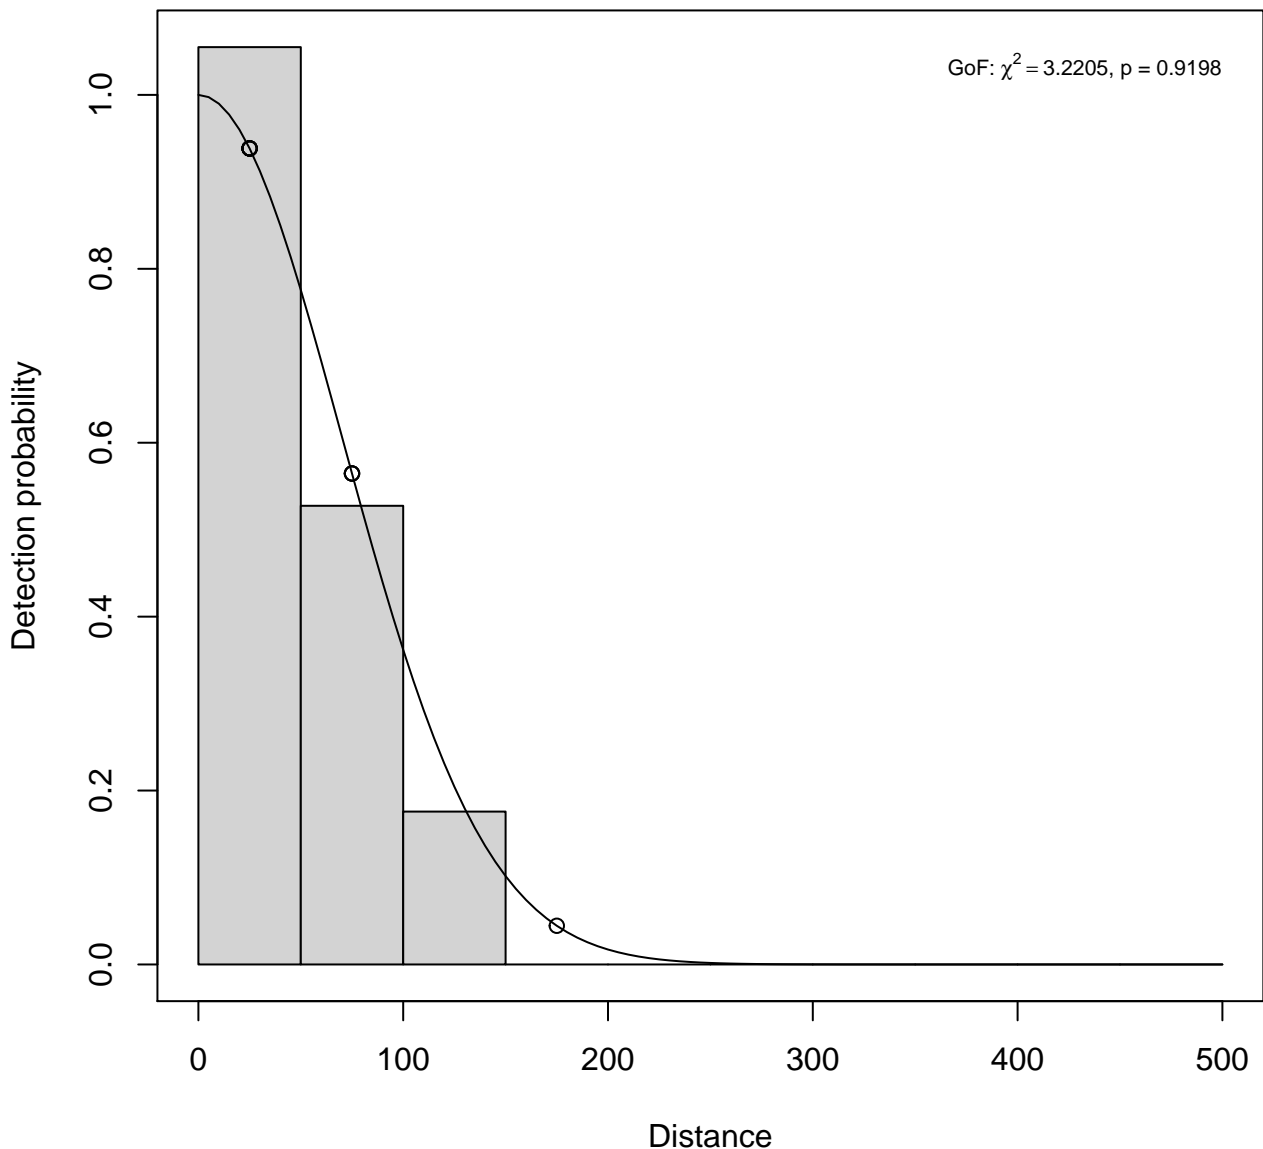

Supplement: s1 [file s1]
