# Supplementary material
Source: MDPI journal article supplement (https://www.mdpi.com/1424-2818/13/7/300)

# **Pionus menstruus – Cauca Valley dry forests – Colombia**

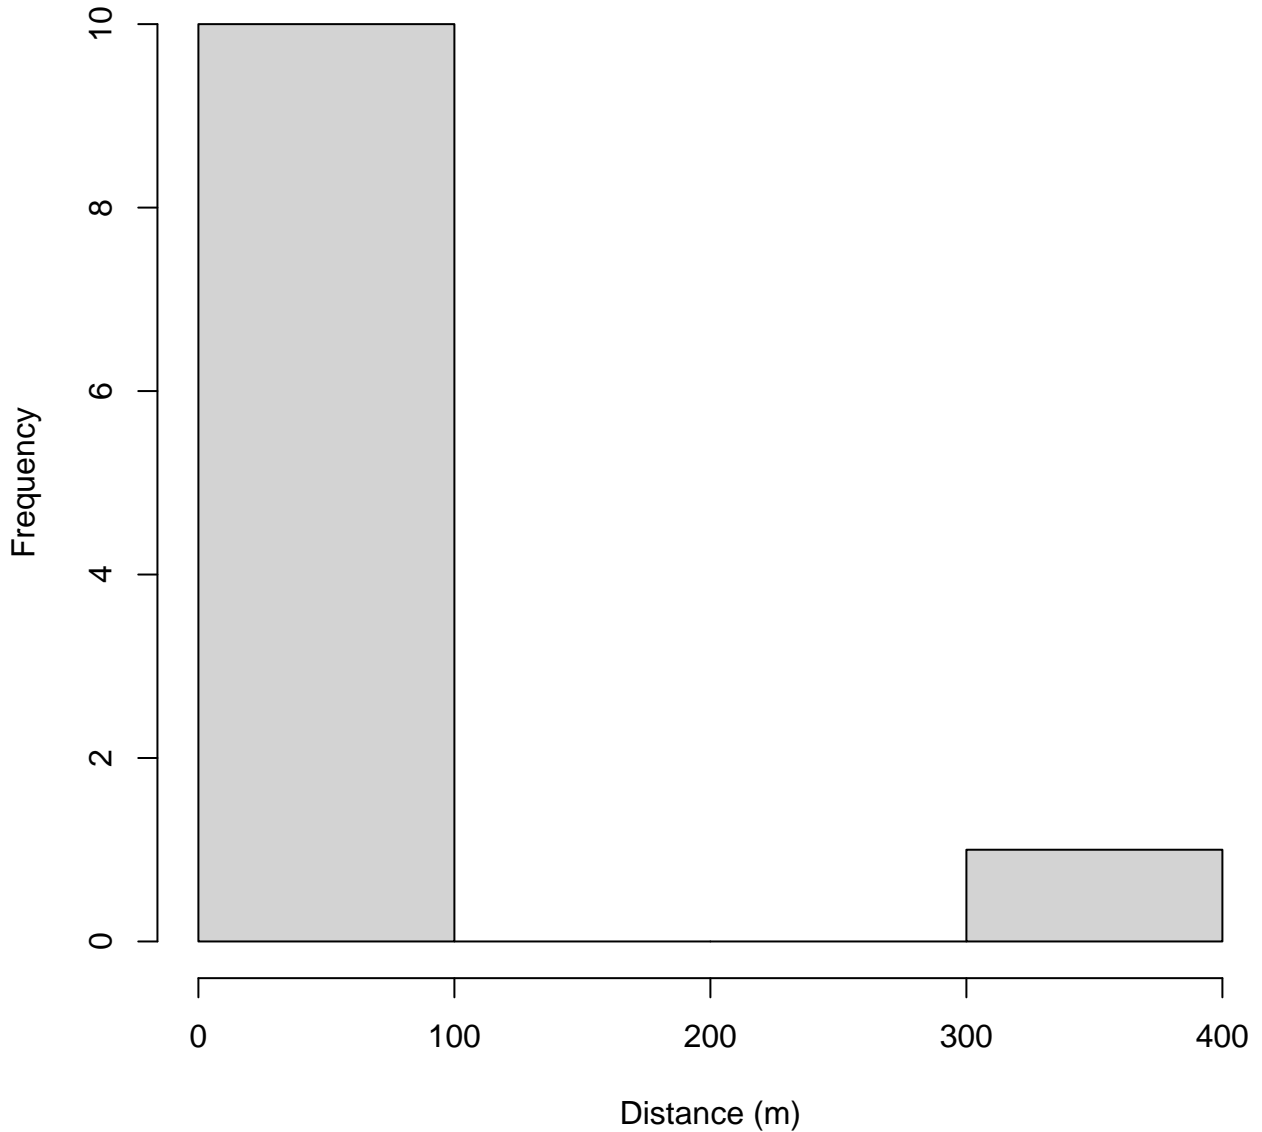

# Pionus menstruus – Cauca Valley dry forests – Colombia

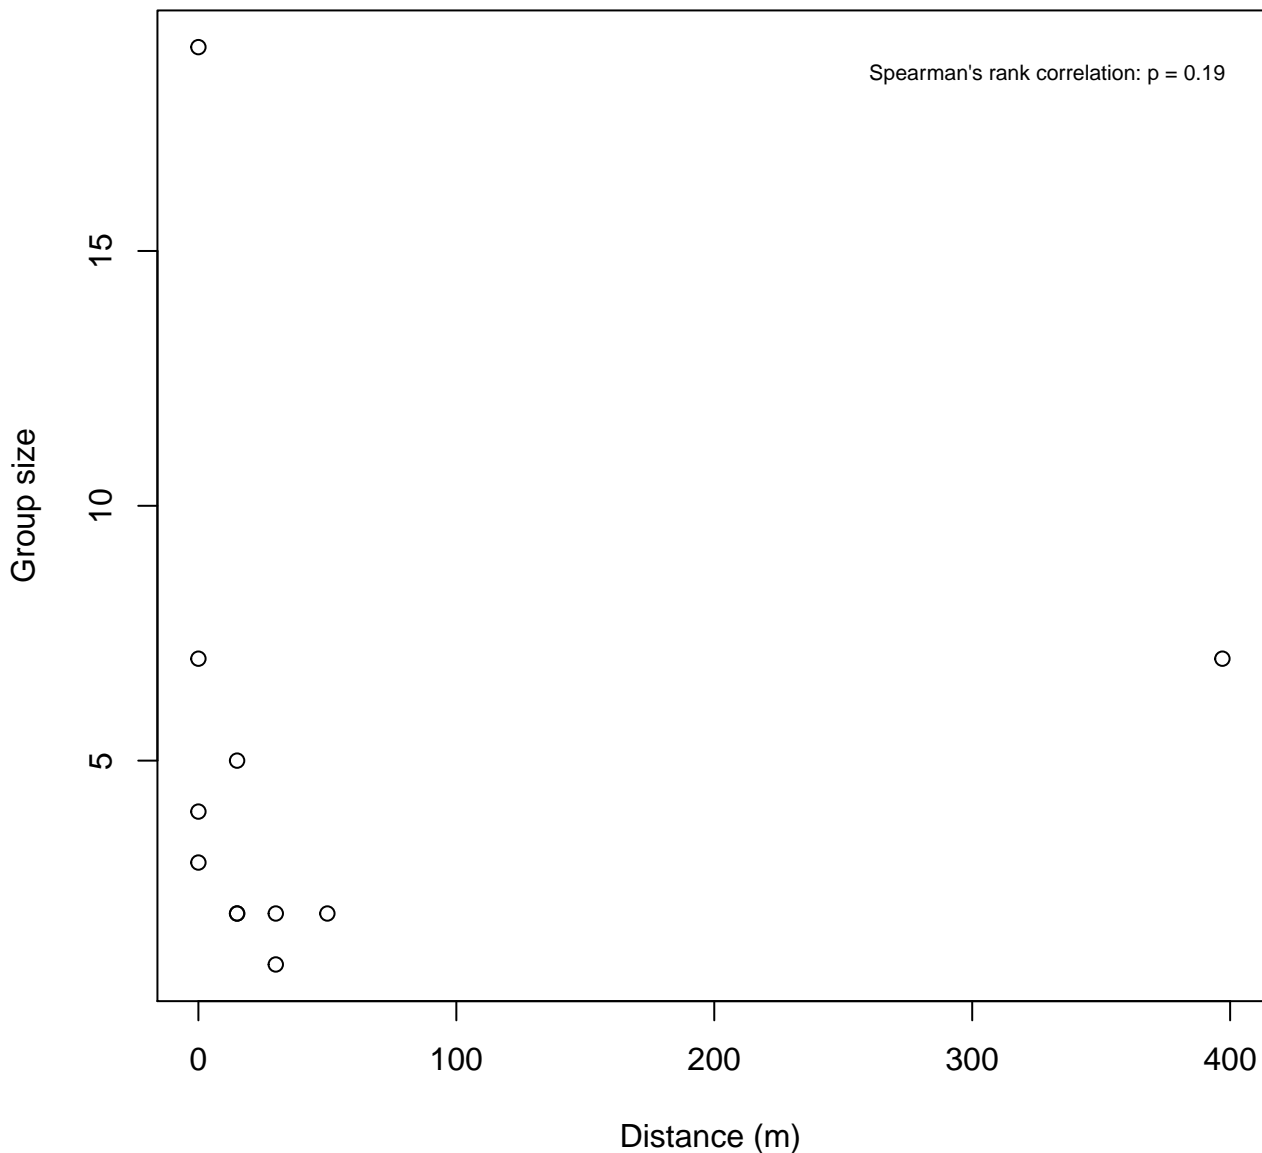

Pionus menstruus – Cauca Valley dry forests – Colombia (N = 11, key function = hr)

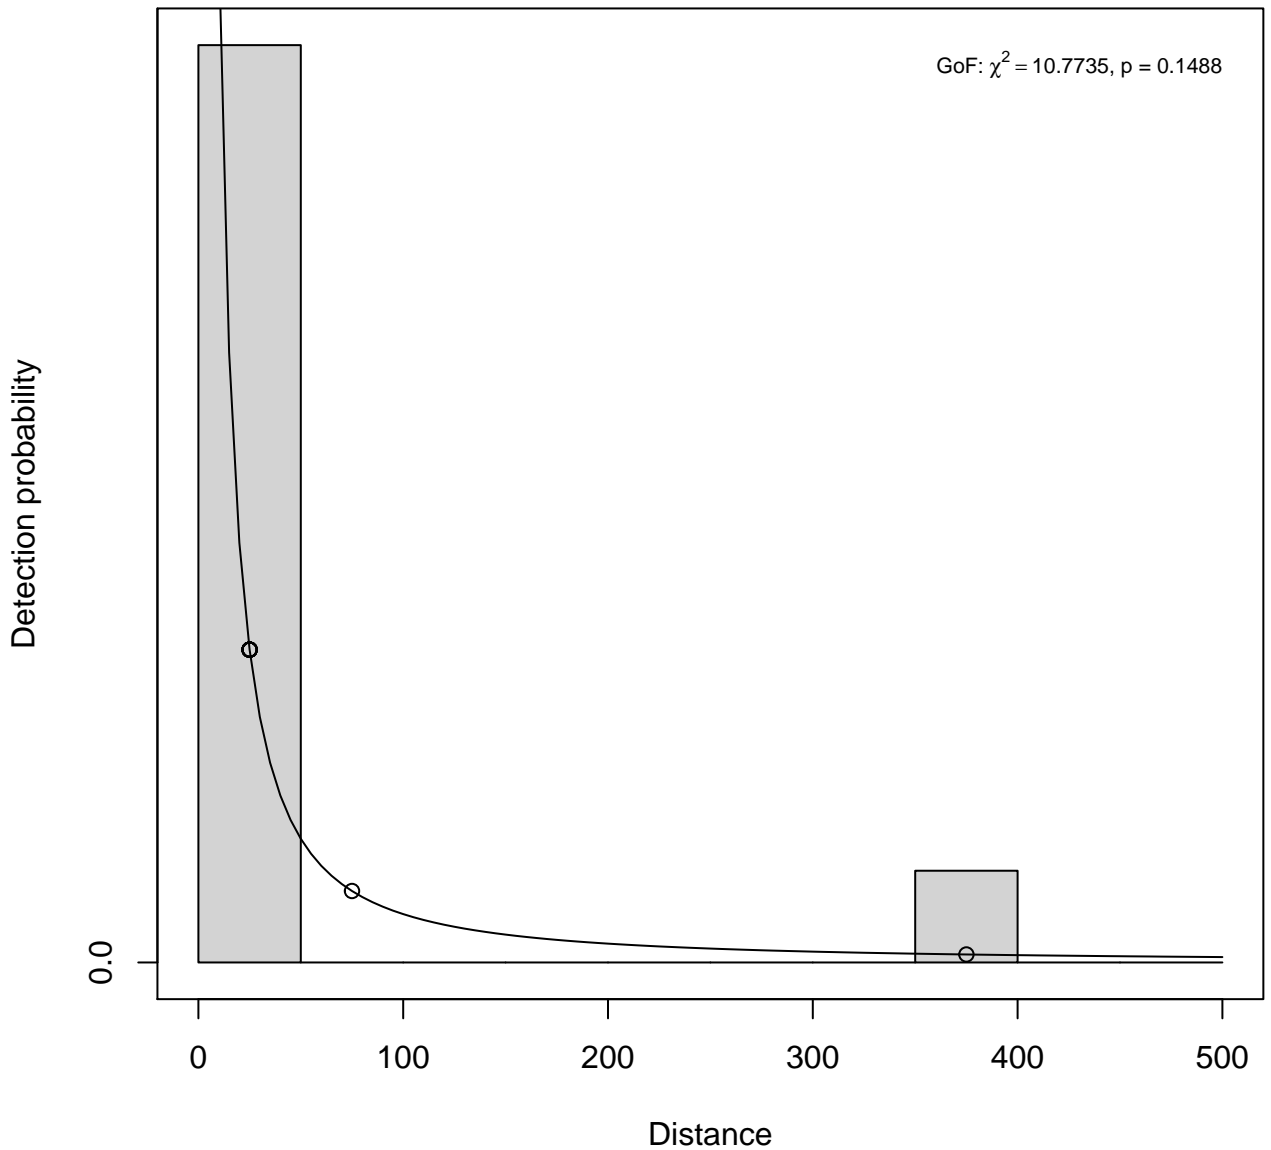

Pionus menstruus – Cauca Valley dry forests – Colombia (N = 11, key function = hr)

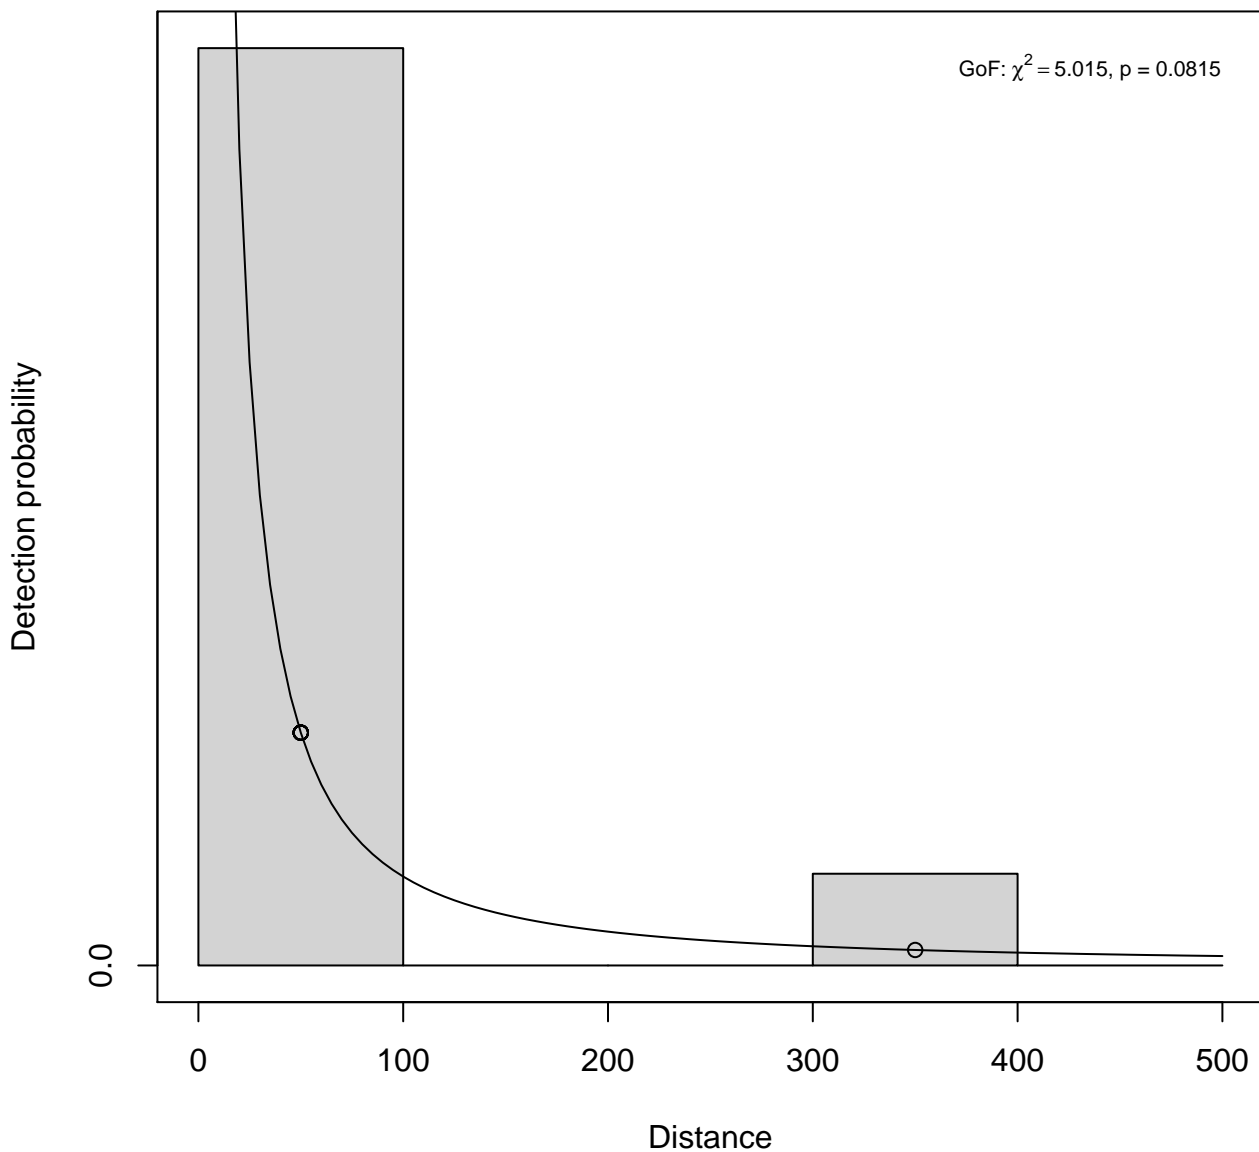

Pionus menstruus – Cauca Valley dry forests – Colombia (N = 11, key function = hr)

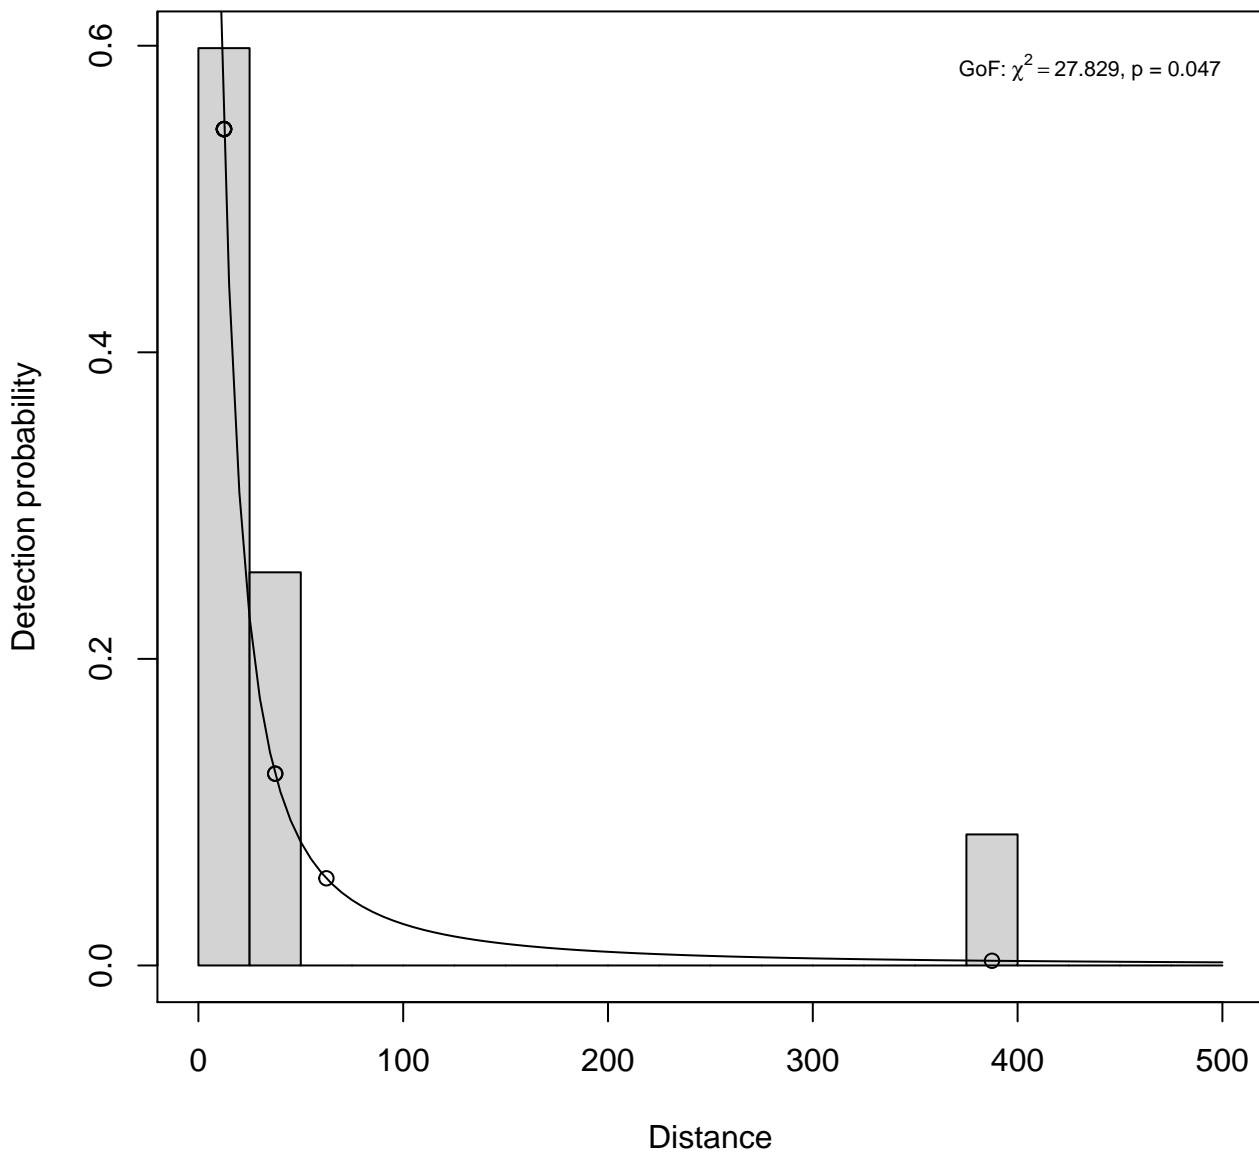

Supplement: s1 [file s1]
