# Supplementary material
Source: MDPI journal article supplement (https://www.mdpi.com/1424-2818/13/7/300)

# **Amazona auropalliata – Central American dry forests – Costa Rica**

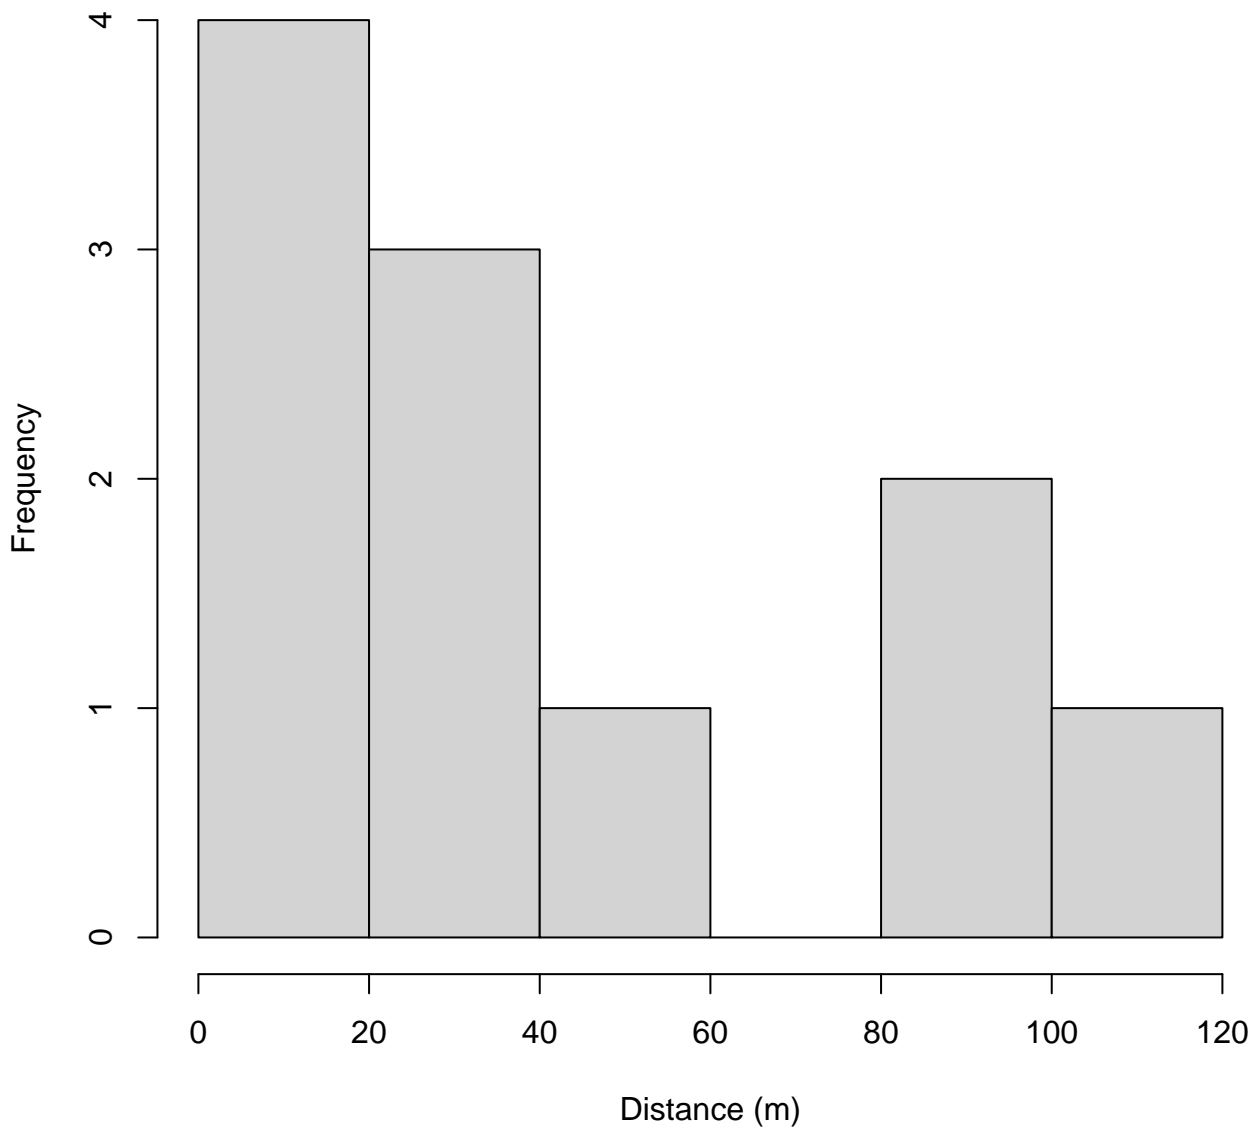

# Amazona auropalliata – Central American dry forests – Costa Rica

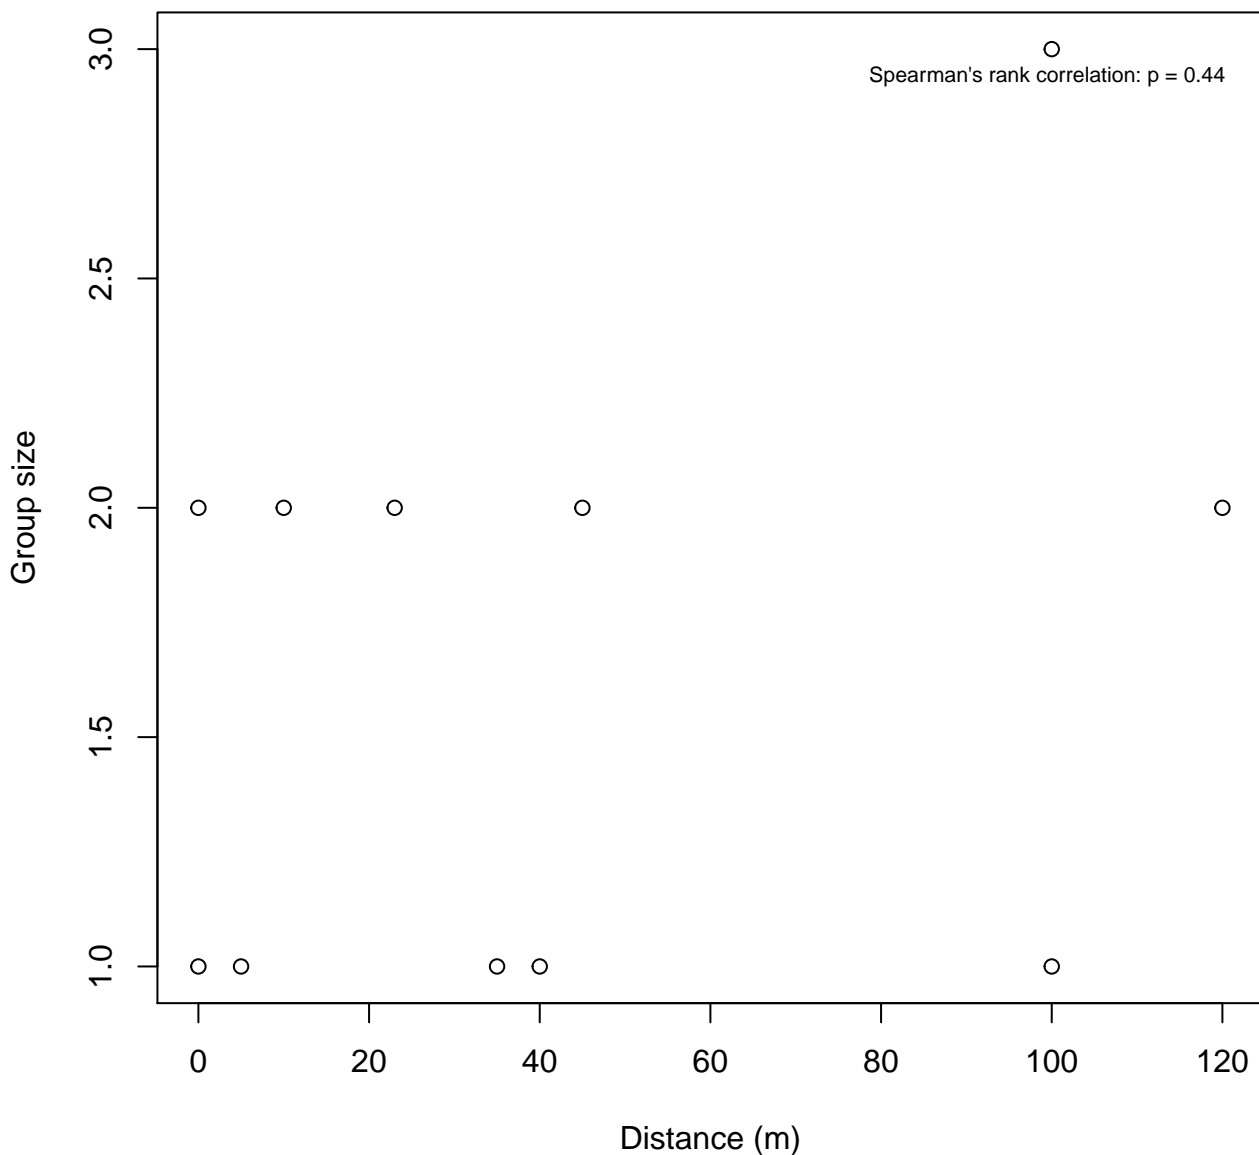

*Amazona auropalliata* – Central American dry forests – Costa Rica (N = 11, key function = hn)

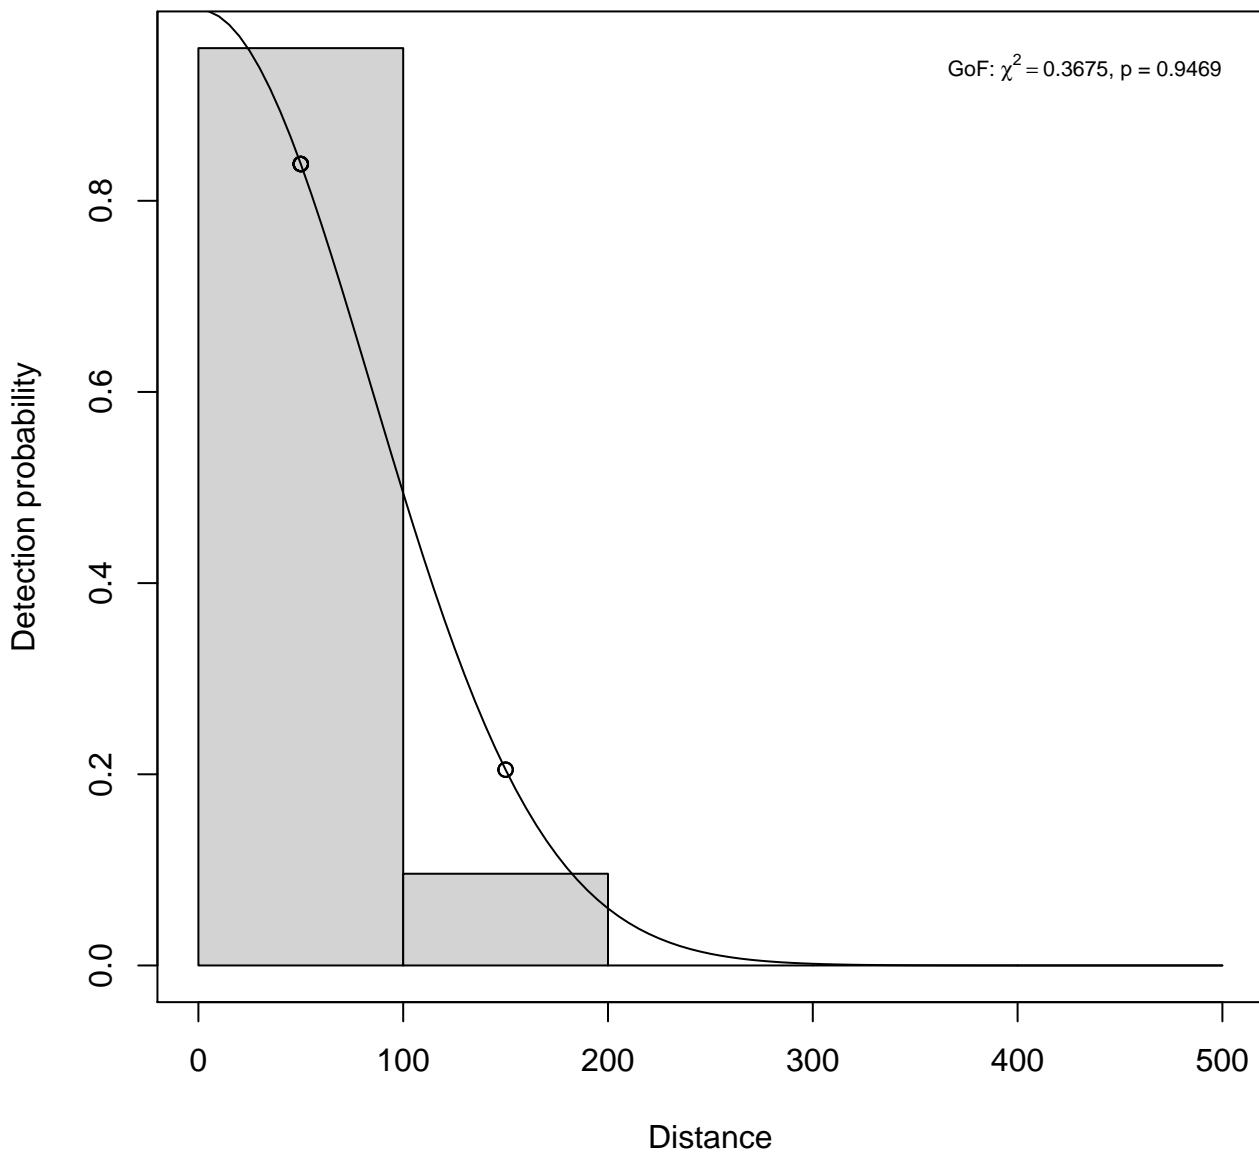

*Amazona auropalliata* – Central American dry forests – Costa Rica (N = 11, key function = hn)

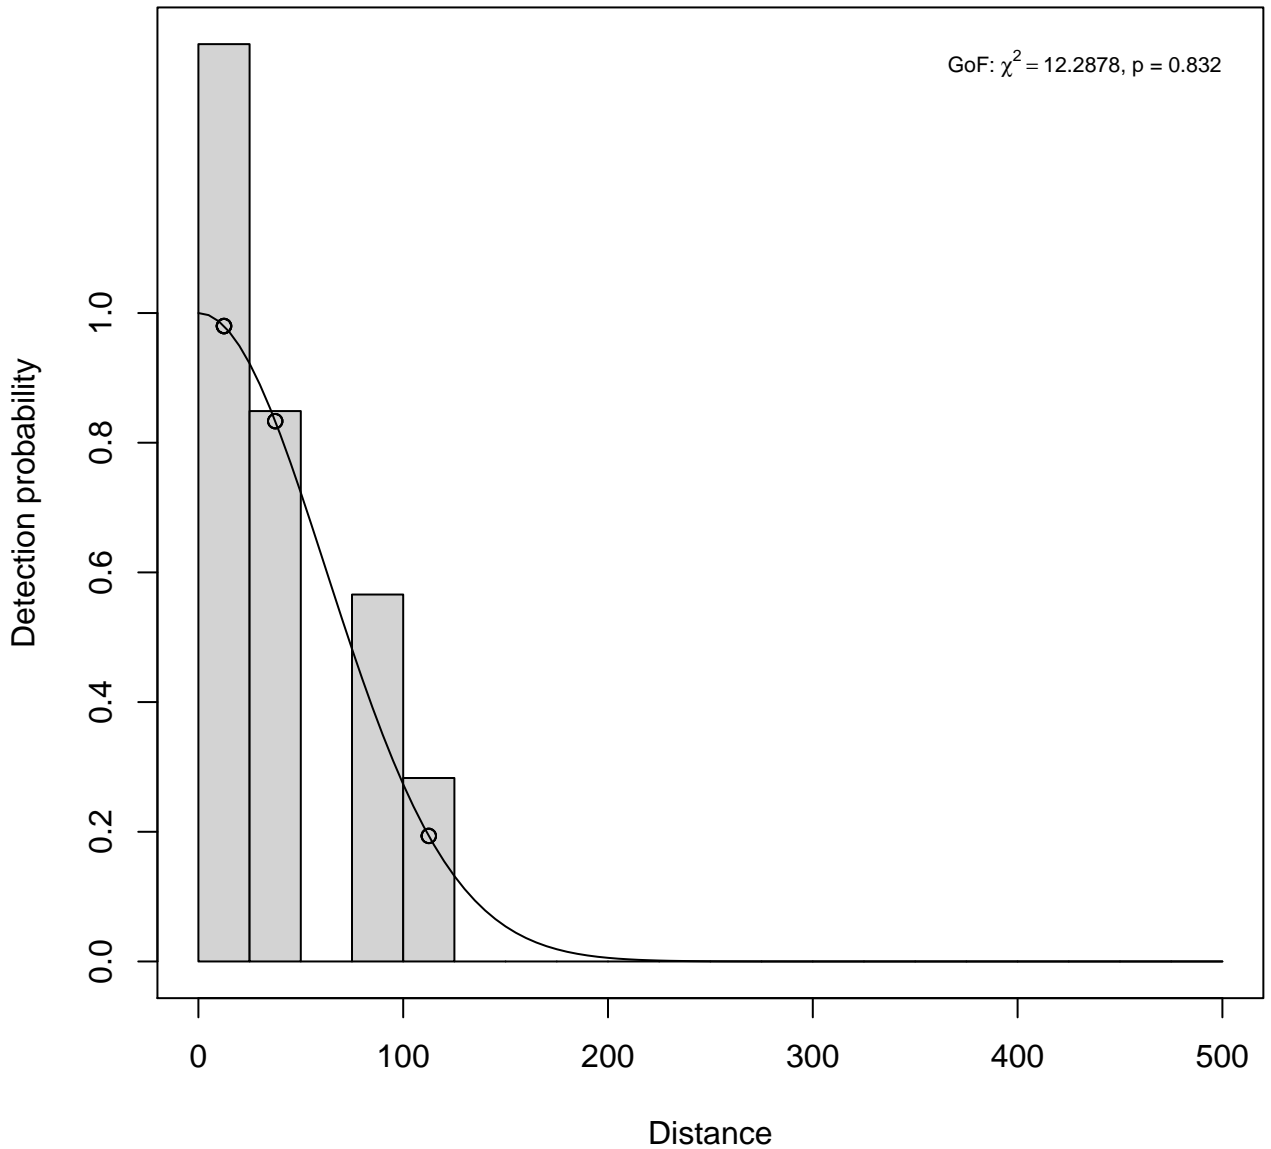

*Amazona auropalliata* – Central American dry forests – Costa Rica (N = 11, key function = hn)

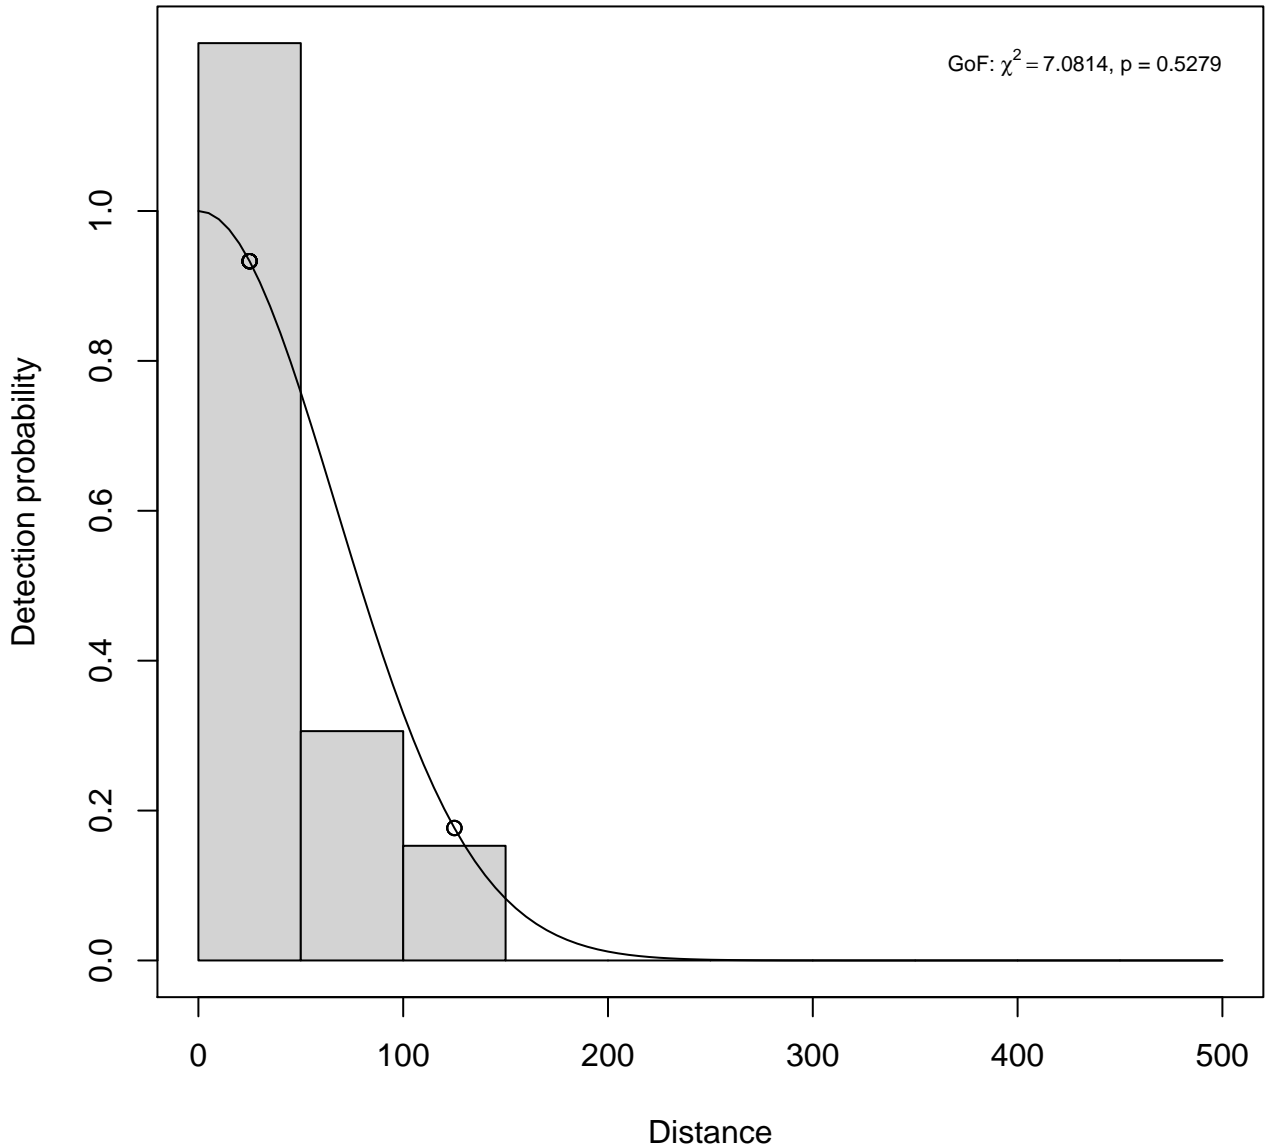

Supplement: s1 [file s1]
