# Supplementary material
Source: MDPI journal article supplement (https://www.mdpi.com/1424-2818/13/7/300)

# Enicognathus ferrugineus – Patagonian steppe – Argentina

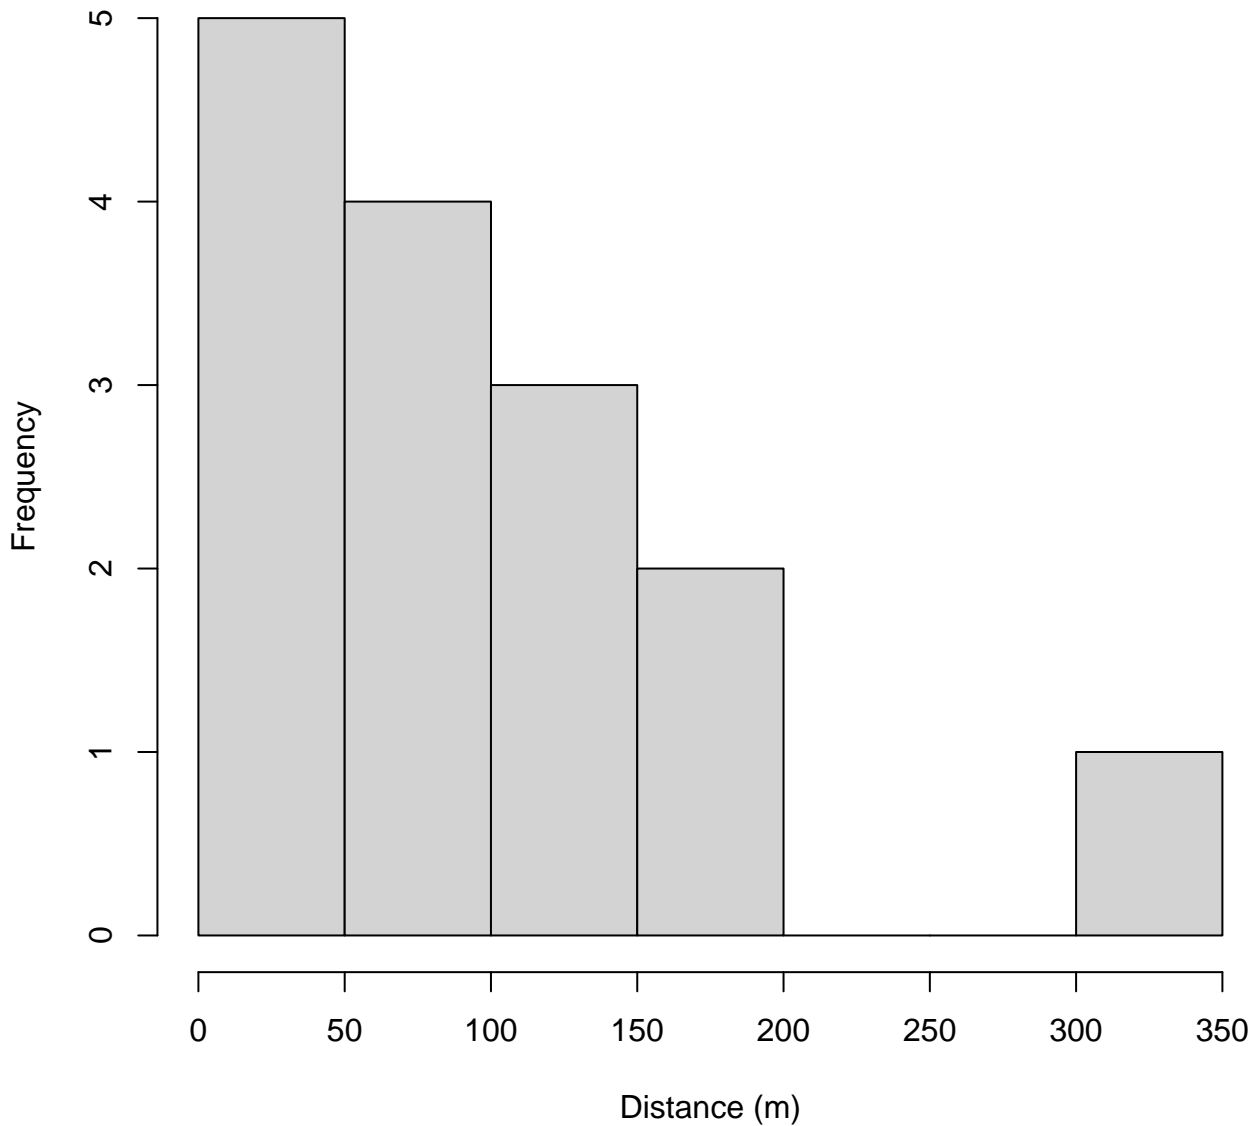

# Enicognathus ferrugineus – Patagonian steppe – Argentina

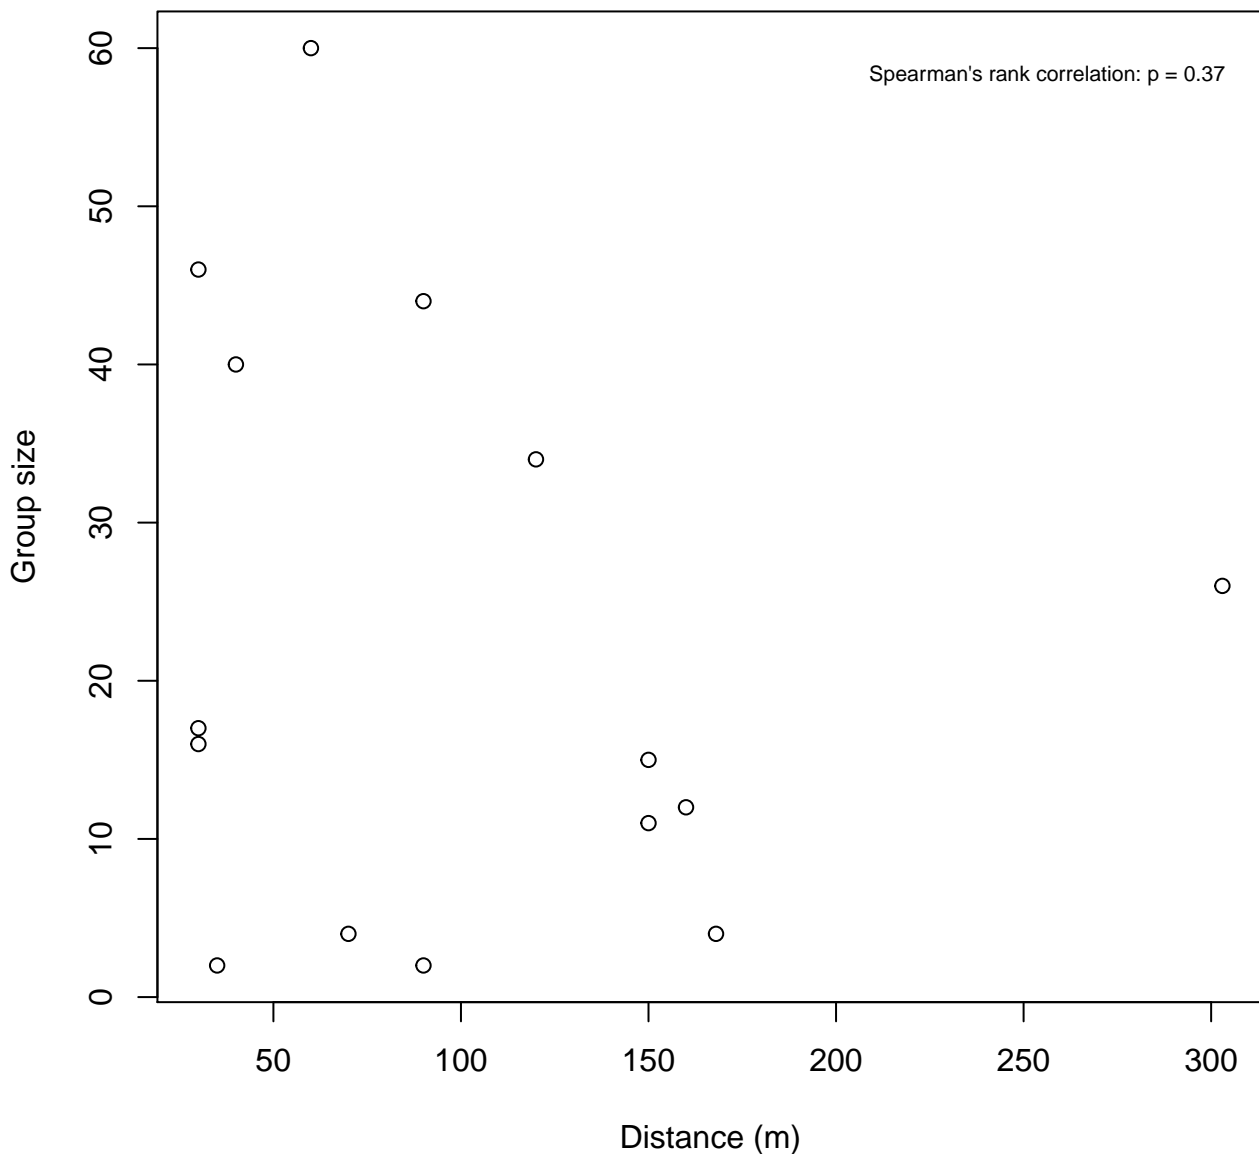

Enicognathus ferrugineus – Patagonian steppe – Argentina (N = 15, key function = hn)

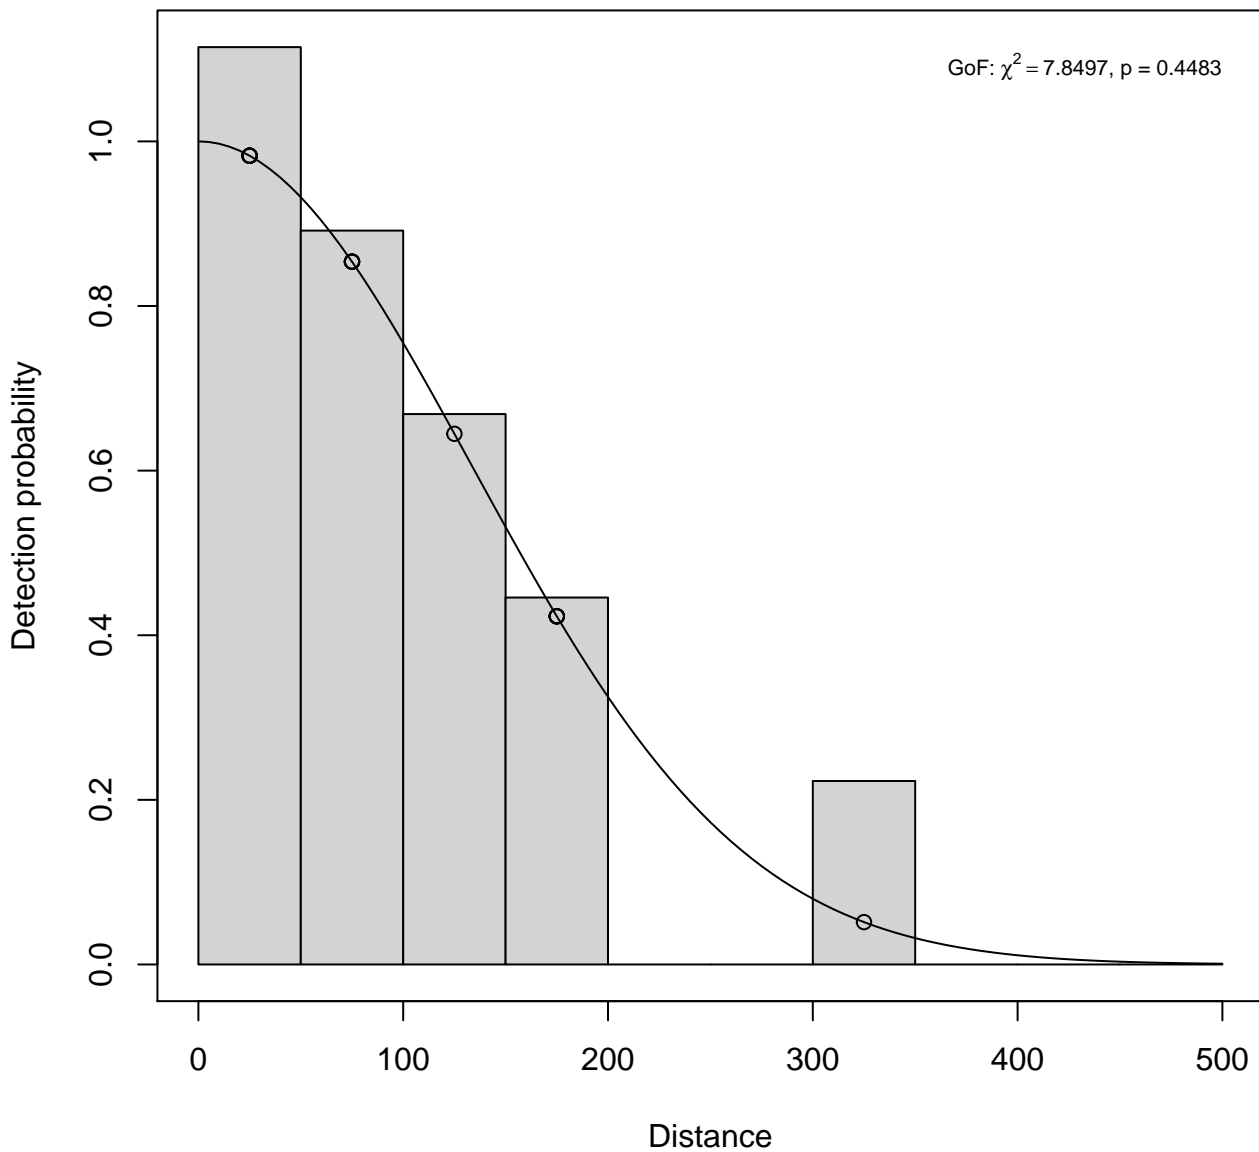

Enicognathus ferrugineus – Patagonian steppe – Argentina (N = 15, key function = hn)

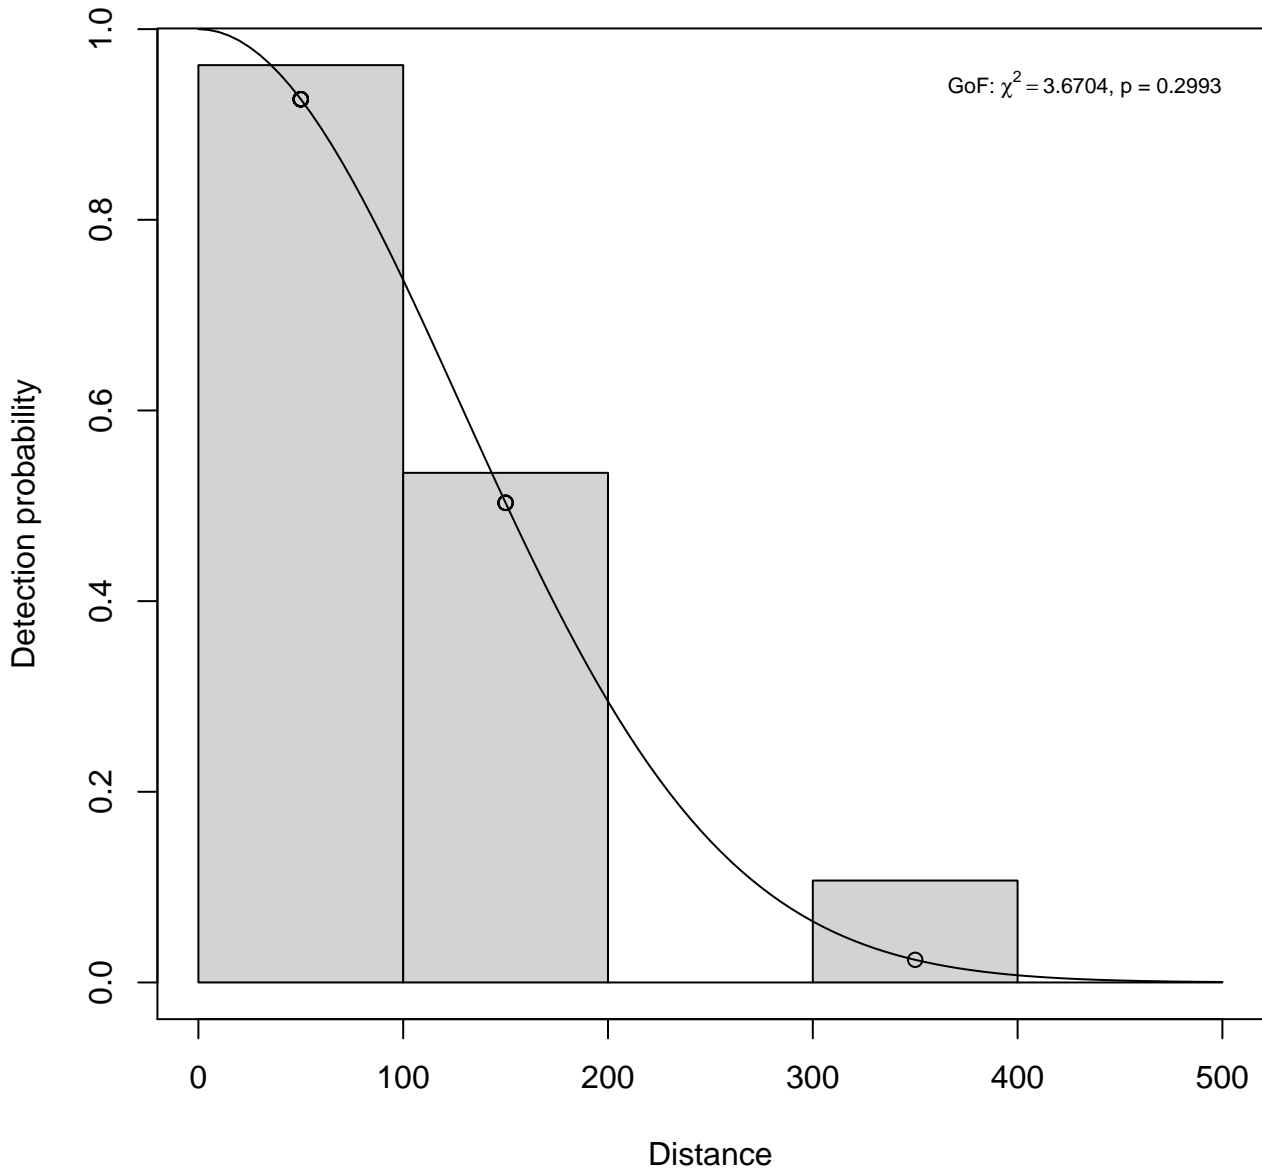

Enicognathus ferrugineus – Patagonian steppe – Argentina (N = 15, key function = hn)

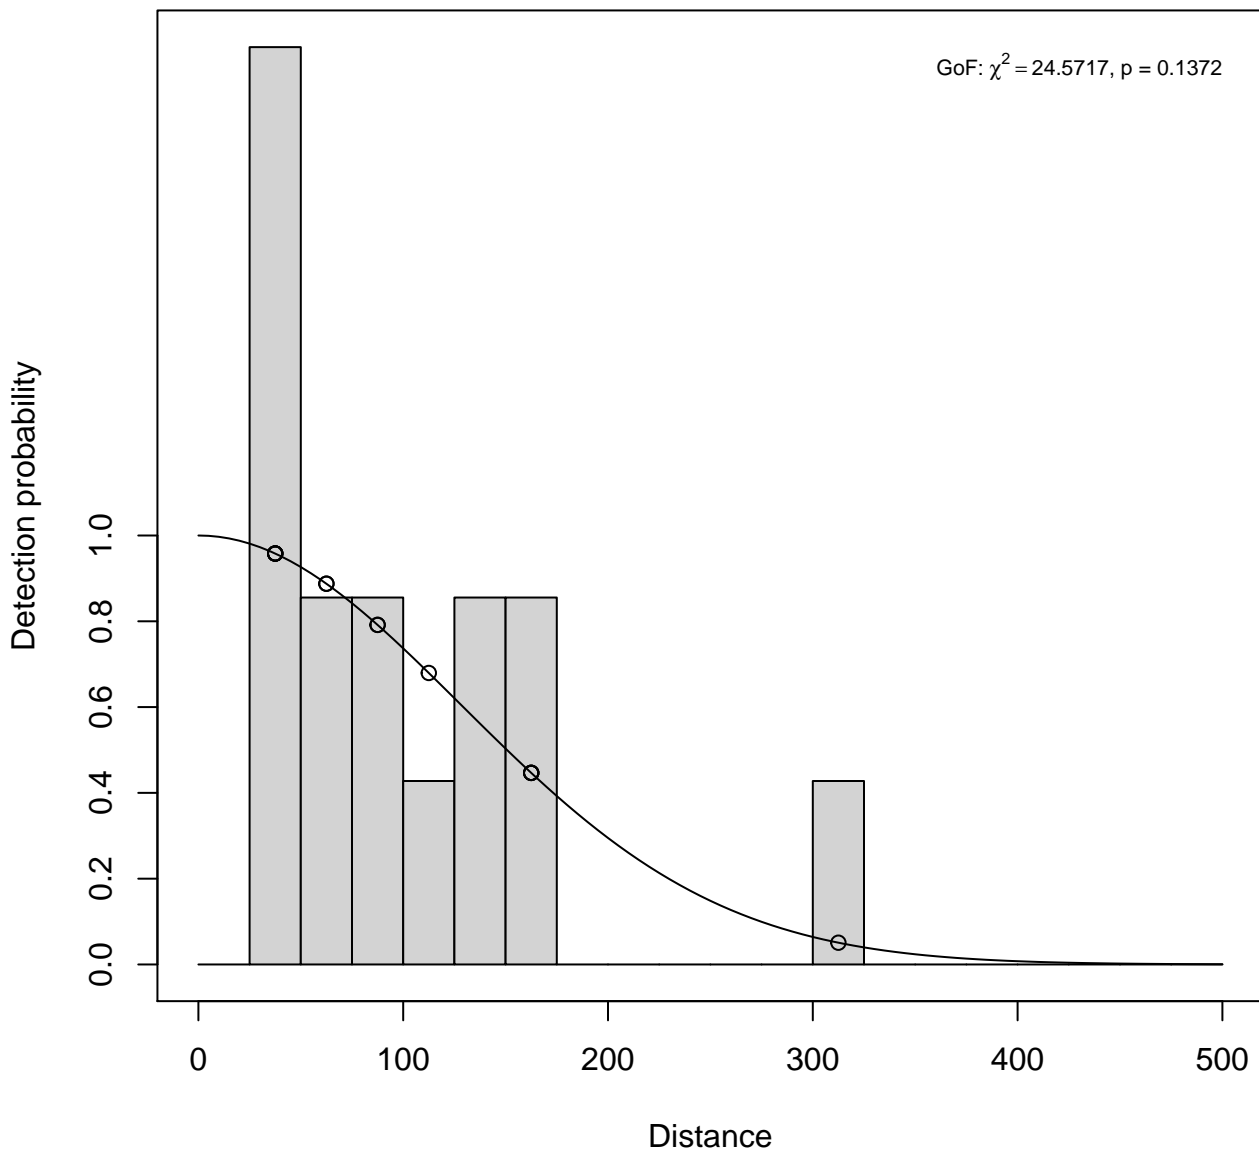

Supplement: s1 [file s1]
