# Supplementary material
Source: MDPI journal article supplement (https://www.mdpi.com/1424-2818/13/7/300)

# **Brotoogeris chiriri – Pantanal – Brazil**

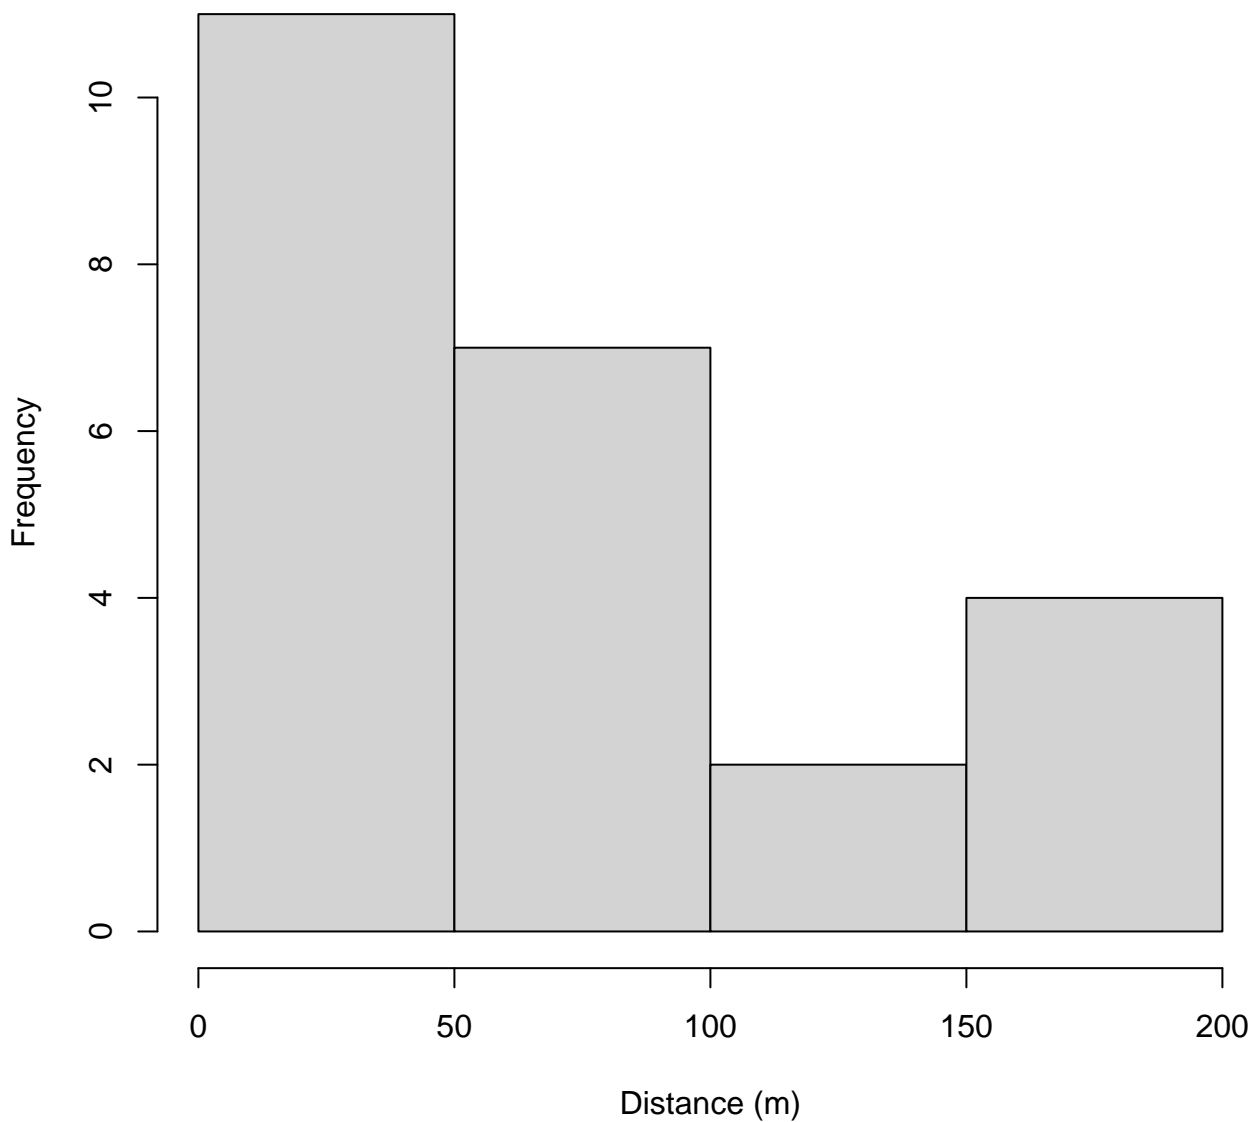

# Brotogeris chiriri – Pantanal – Brazil

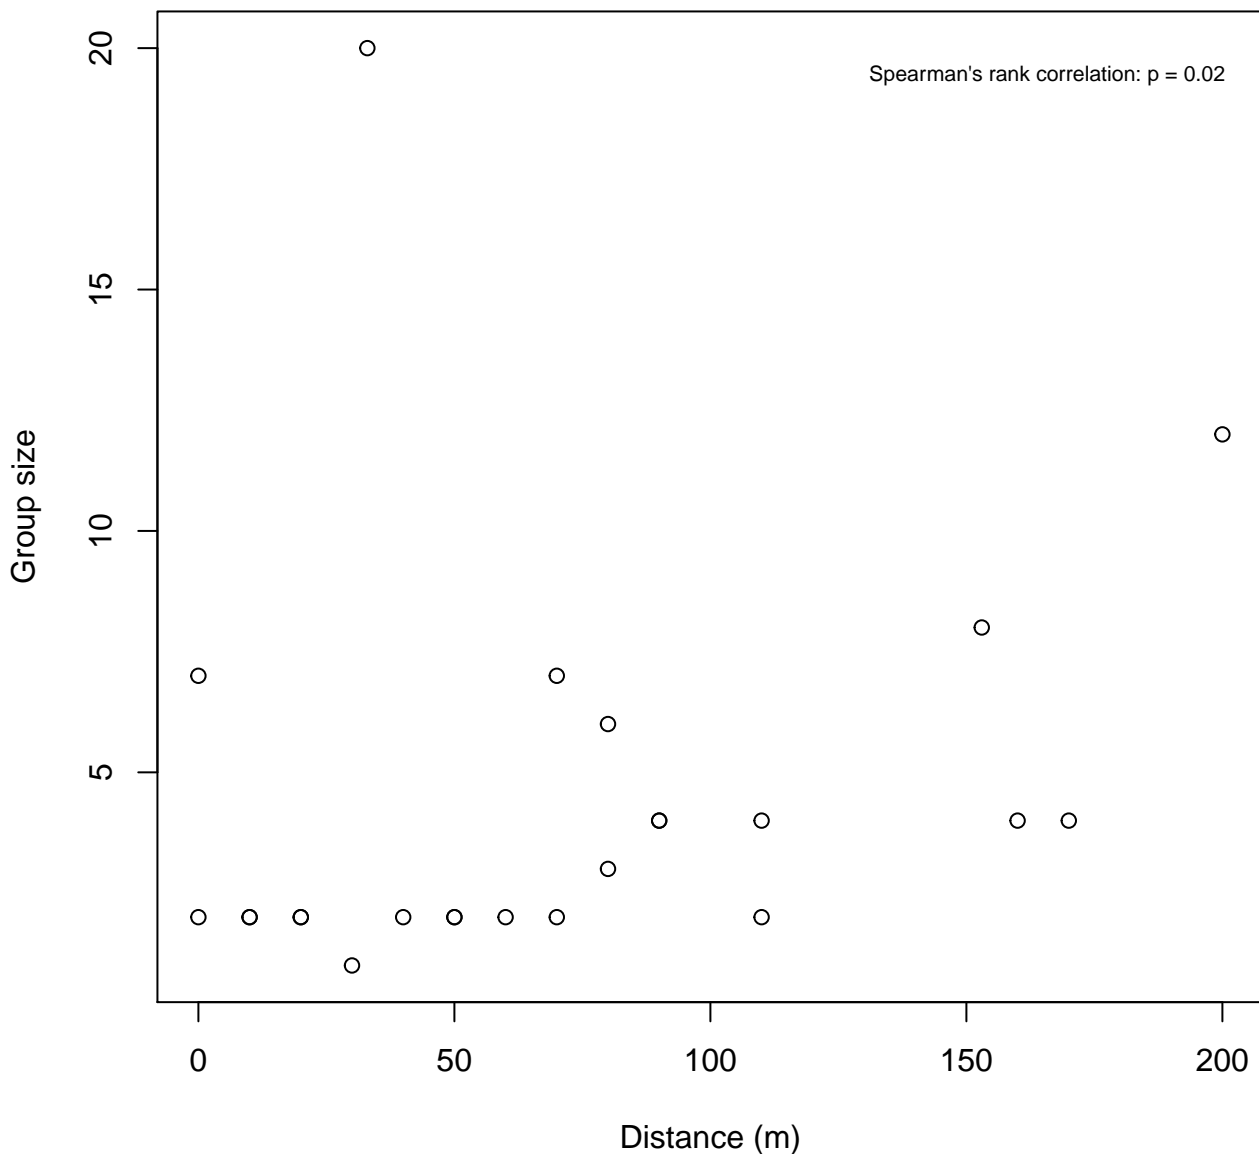

Brotogetis chiriri – Pantanal – Brazil (N = 24, key function = hn)

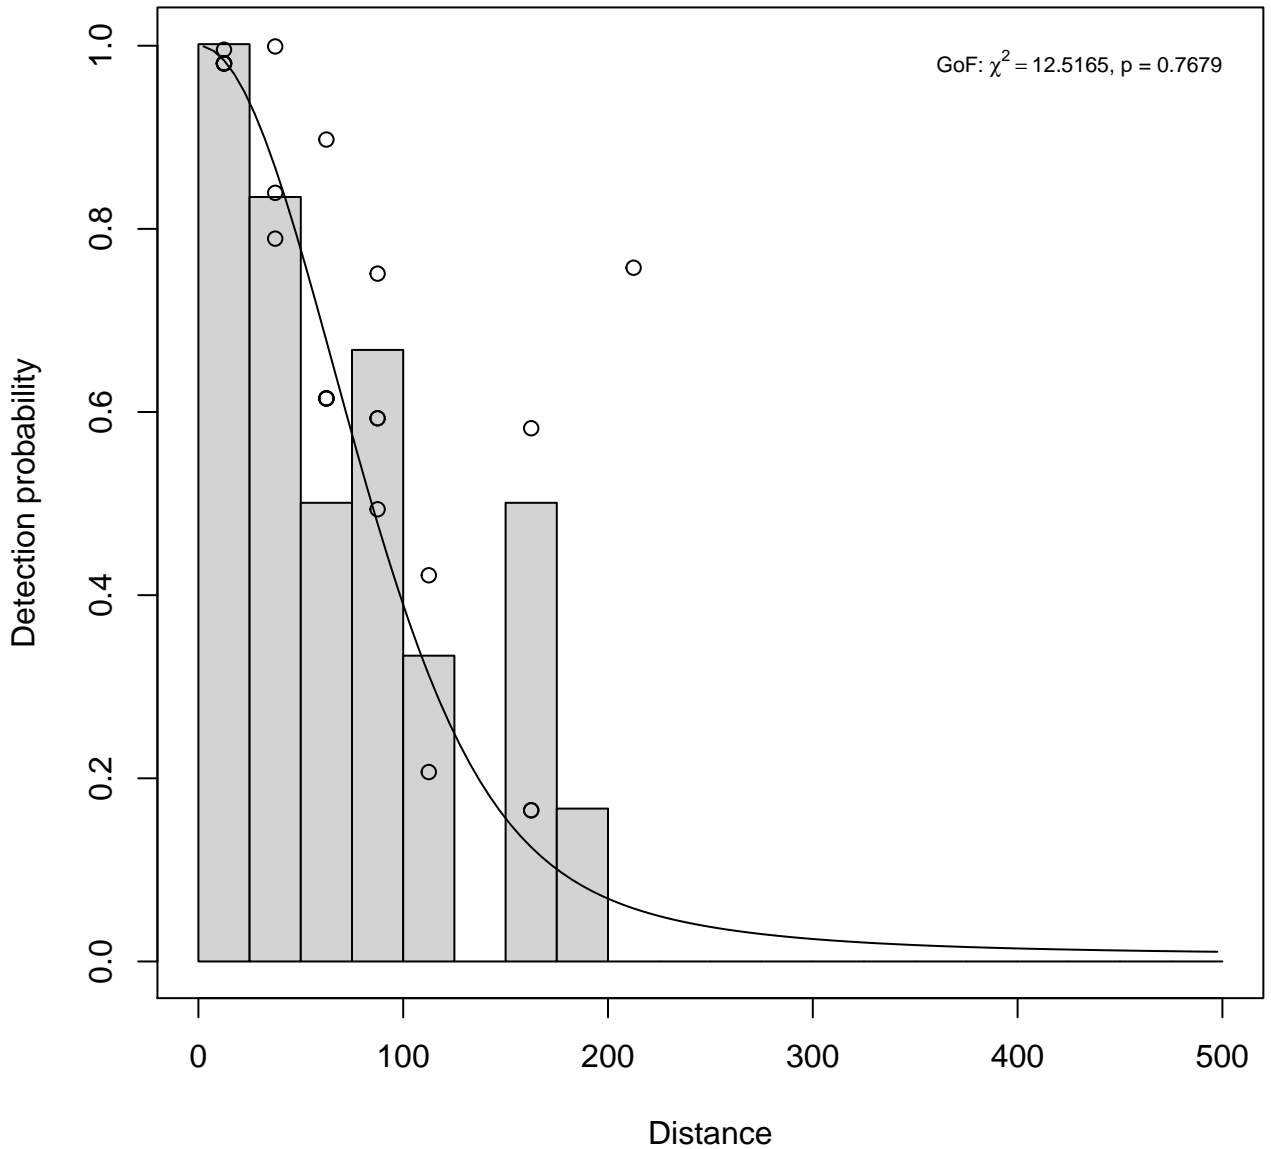

Brotogeris chiriri – Pantanal – Brazil (N = 24, key function = hn)

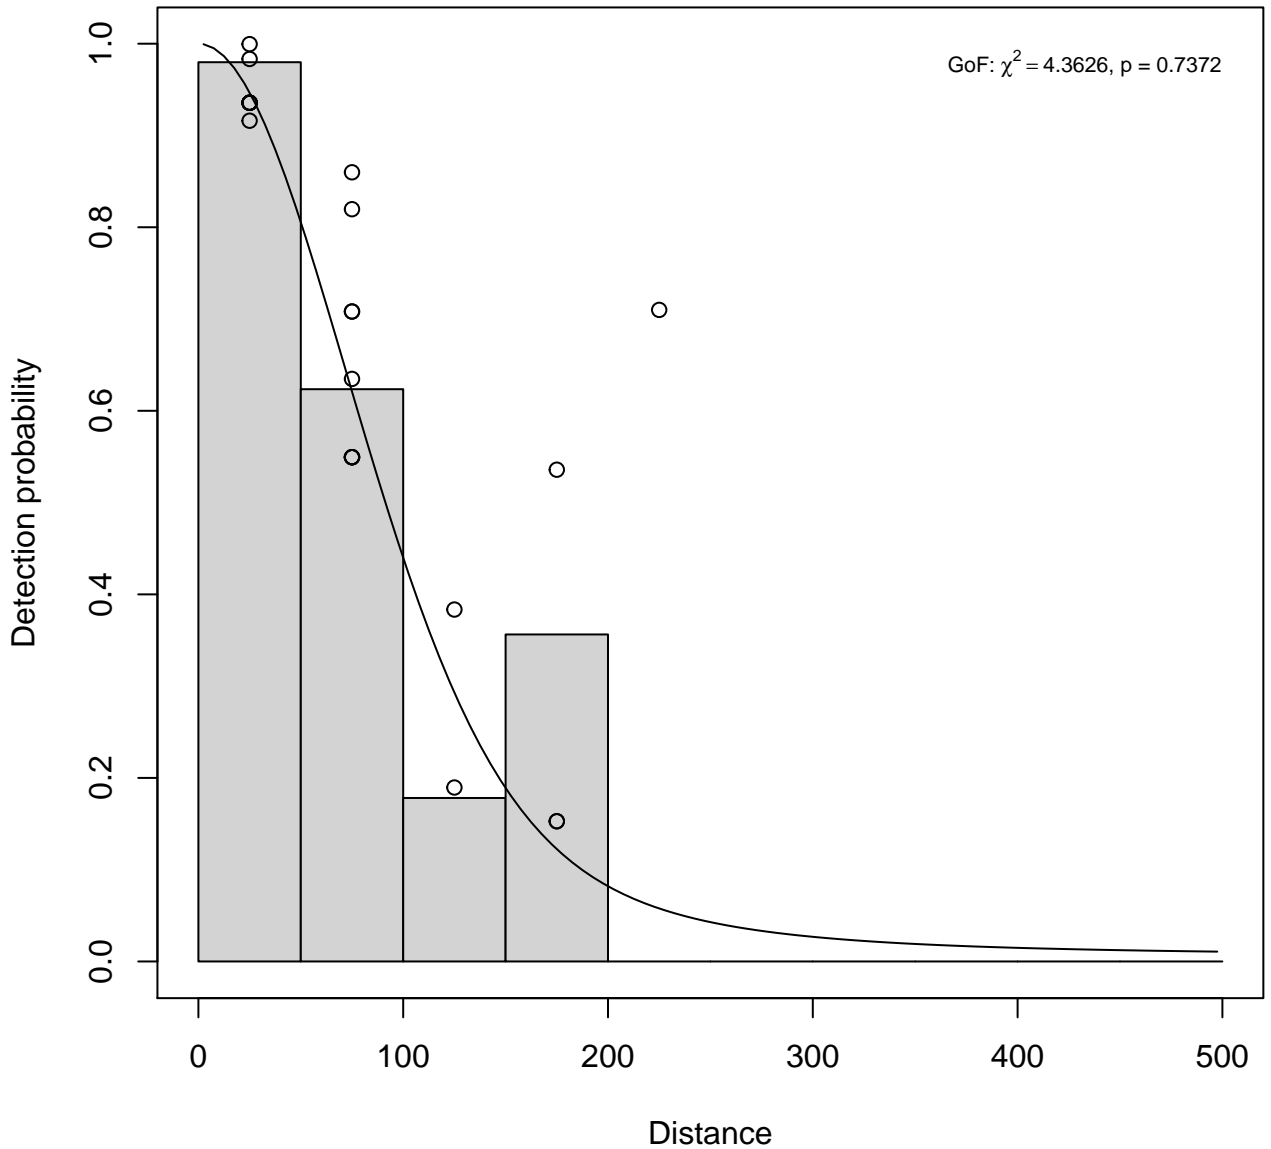

Brotojeris chiriri – Pantanal – Brazil (N = 24, key function = hr)

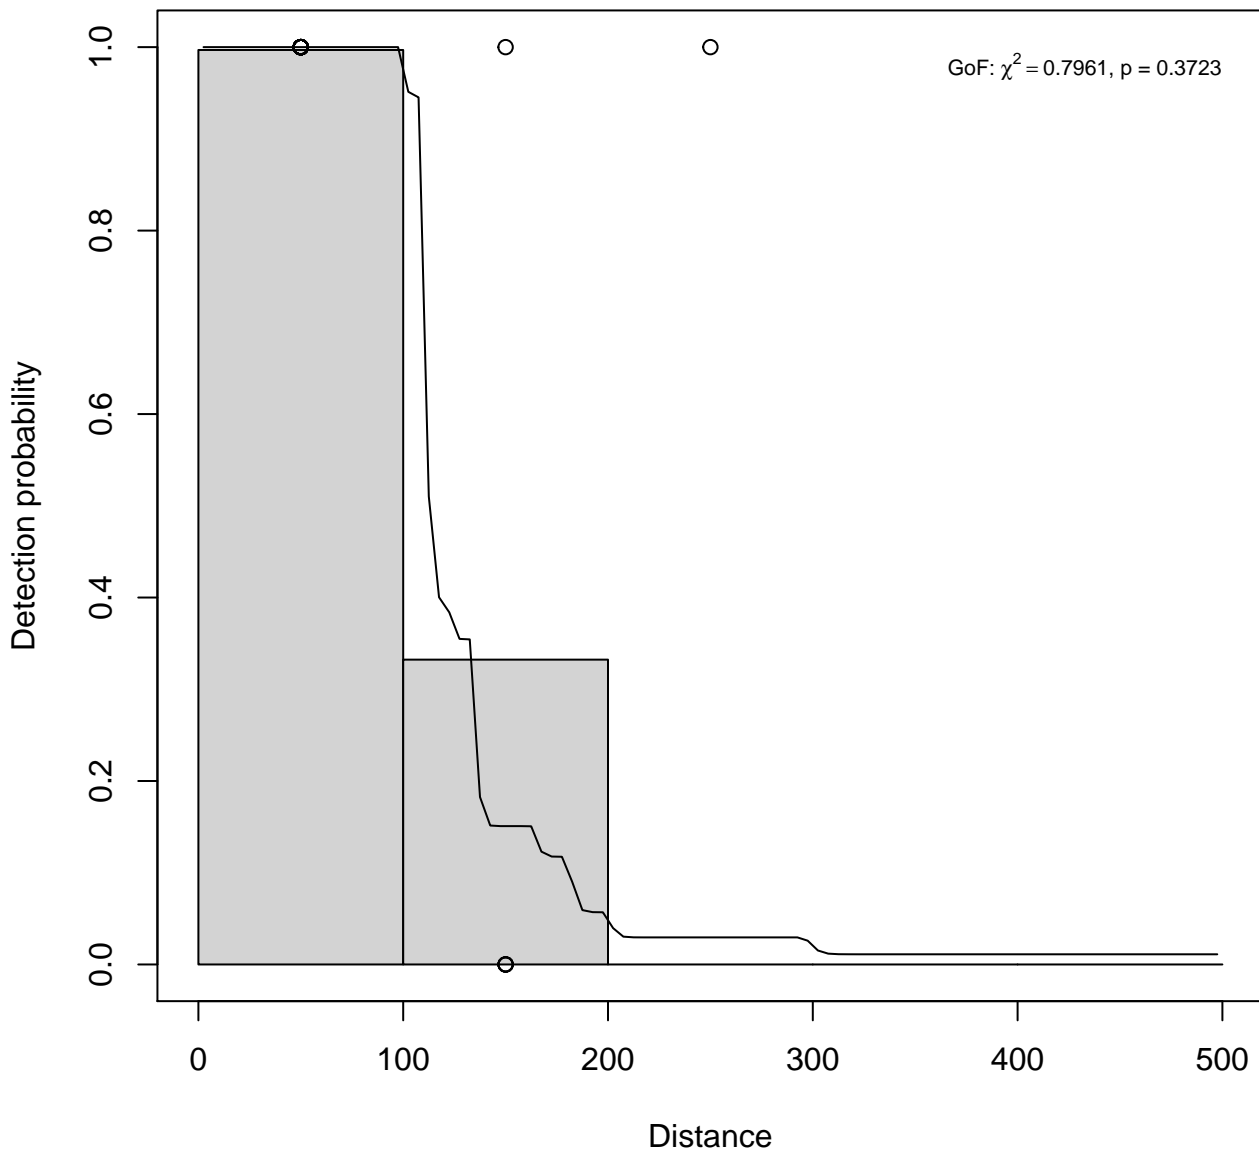

Supplement: s1 [file s1]
