# Supplementary material
Source: MDPI journal article supplement (https://www.mdpi.com/1424-2818/13/7/300)

# **Thectocercus acuticaudatus – Chiquitano dry forests – Brazil**

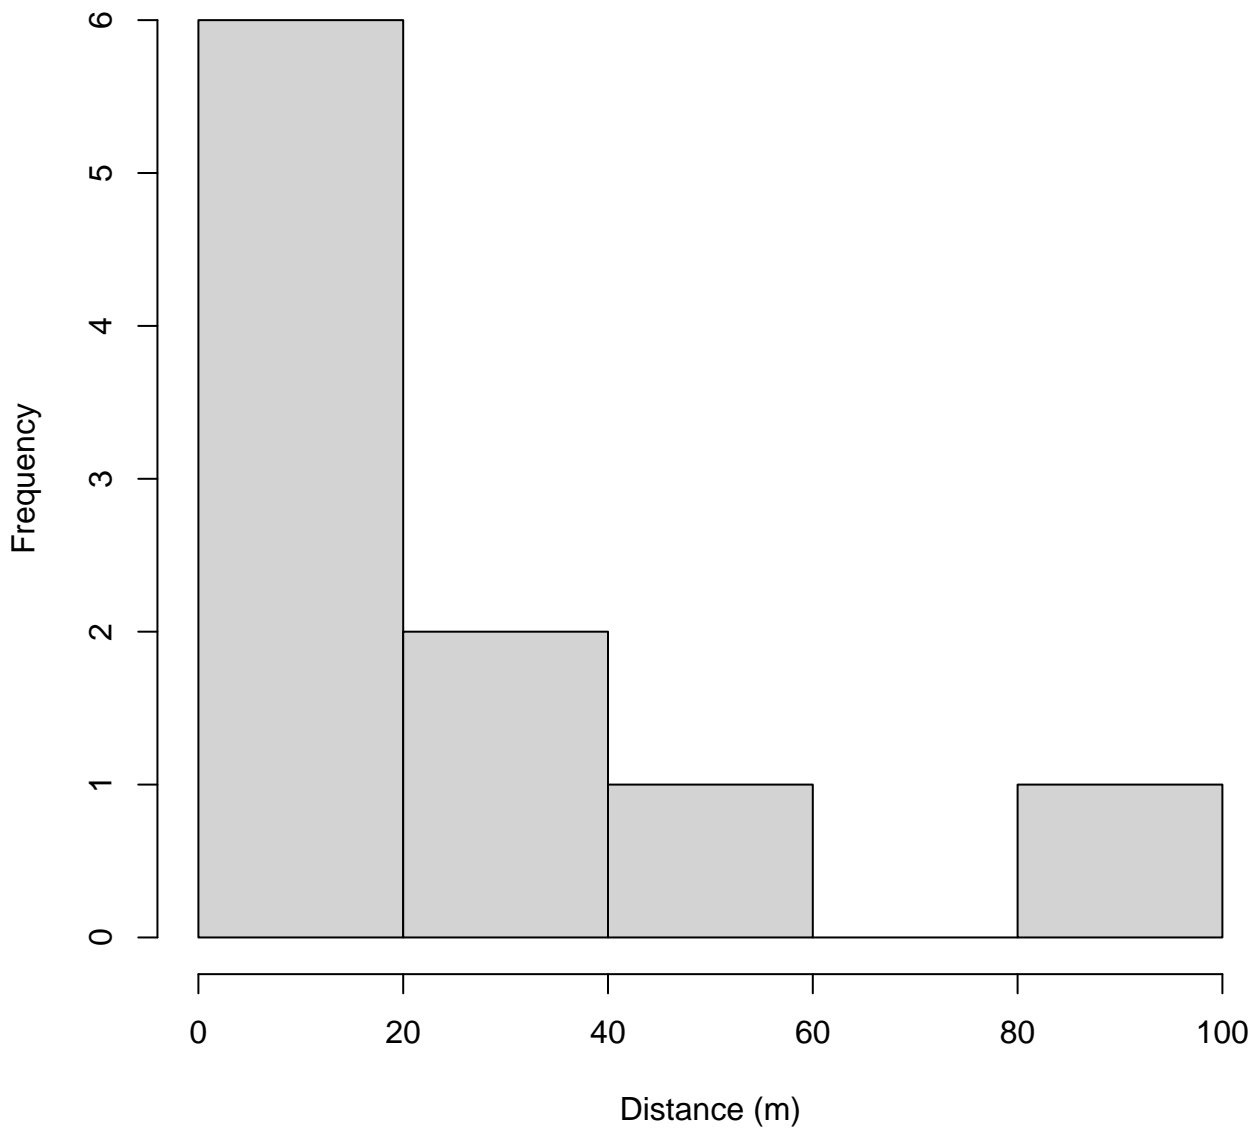

# **Thectocercus acuticaudatus – Chiquitano dry forests – Brazil**

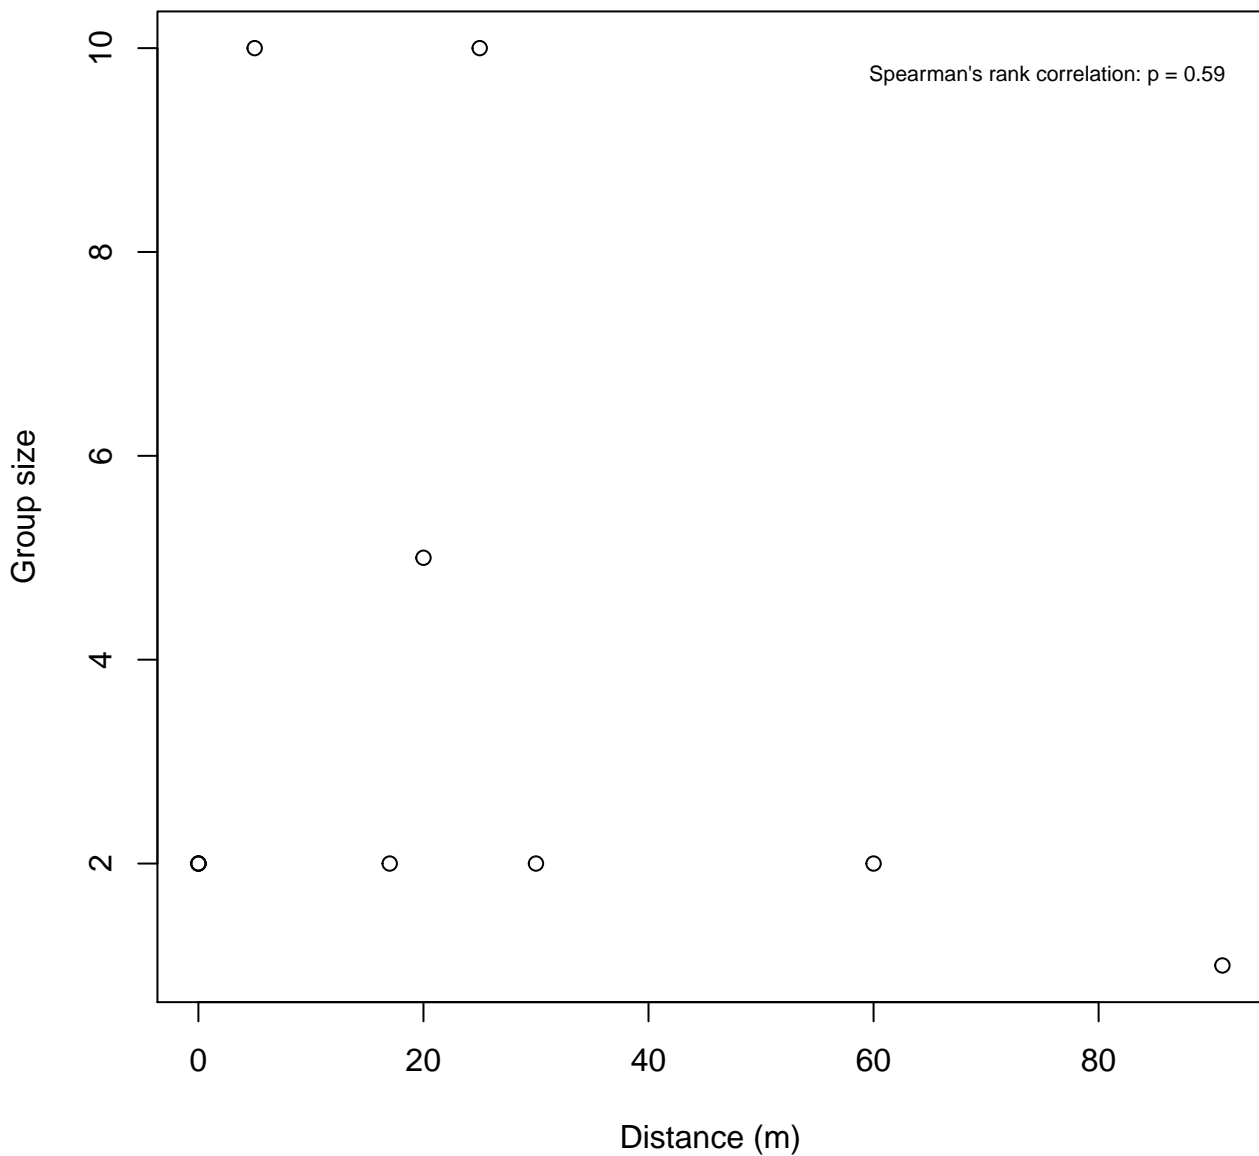

*Tectocercus acuticaudatus* – Chiquitano dry forests – Brazil (N = 10, key function = hn)

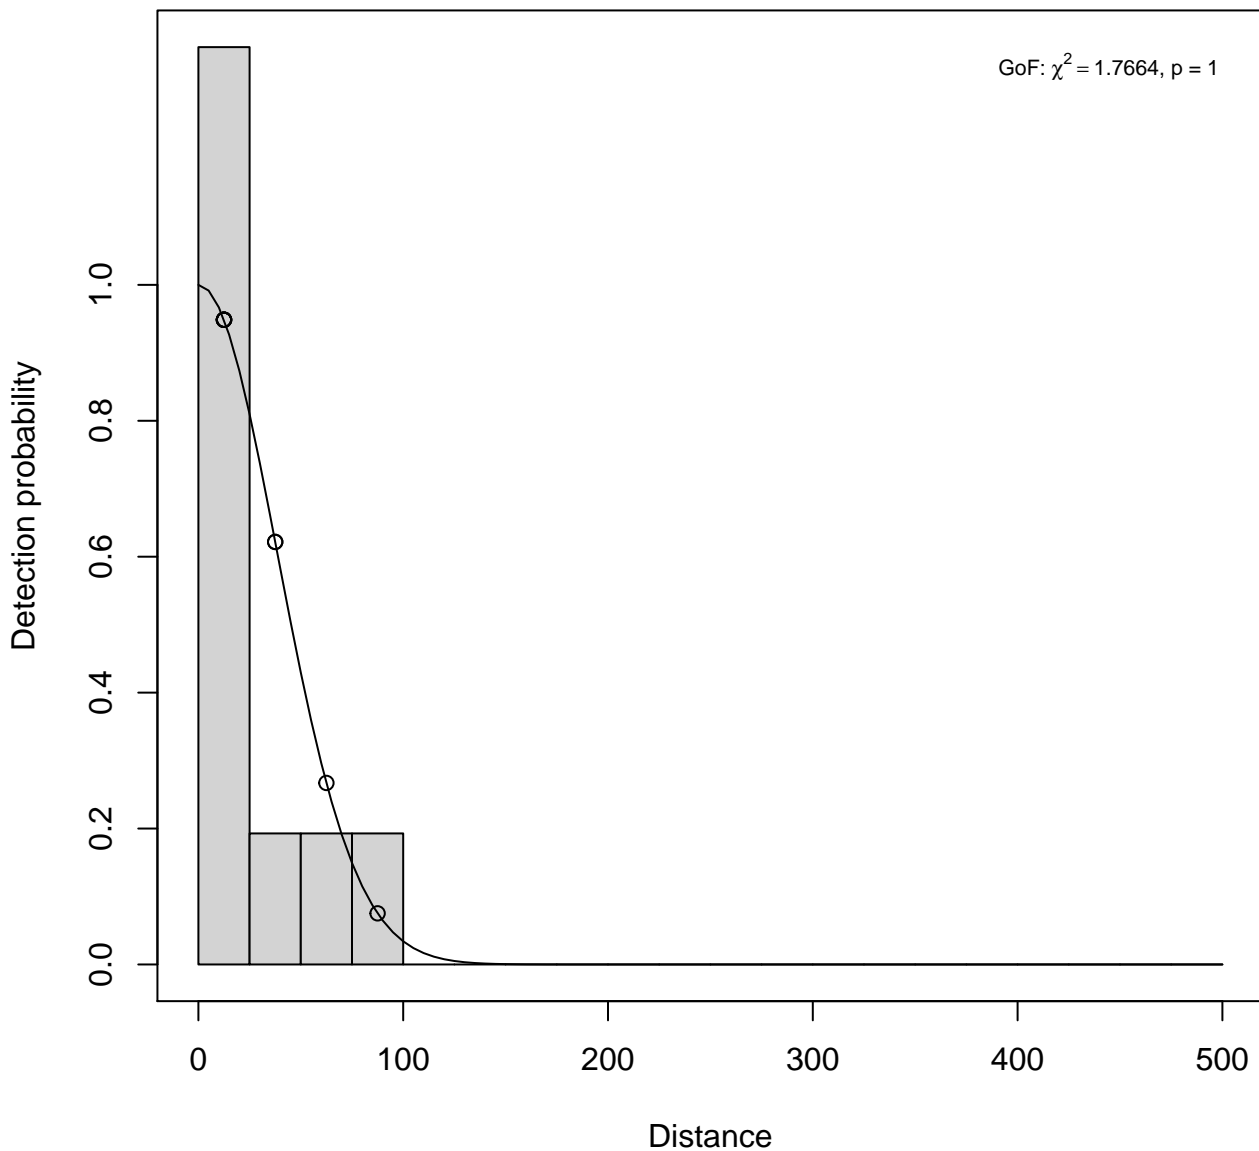

GoF:  $\chi^2 = \text{NA}$ , p = NA

*Thectocercus acuticaudatus* – Chiquitano dry forests – Brazil (N = 10, key function = hn)

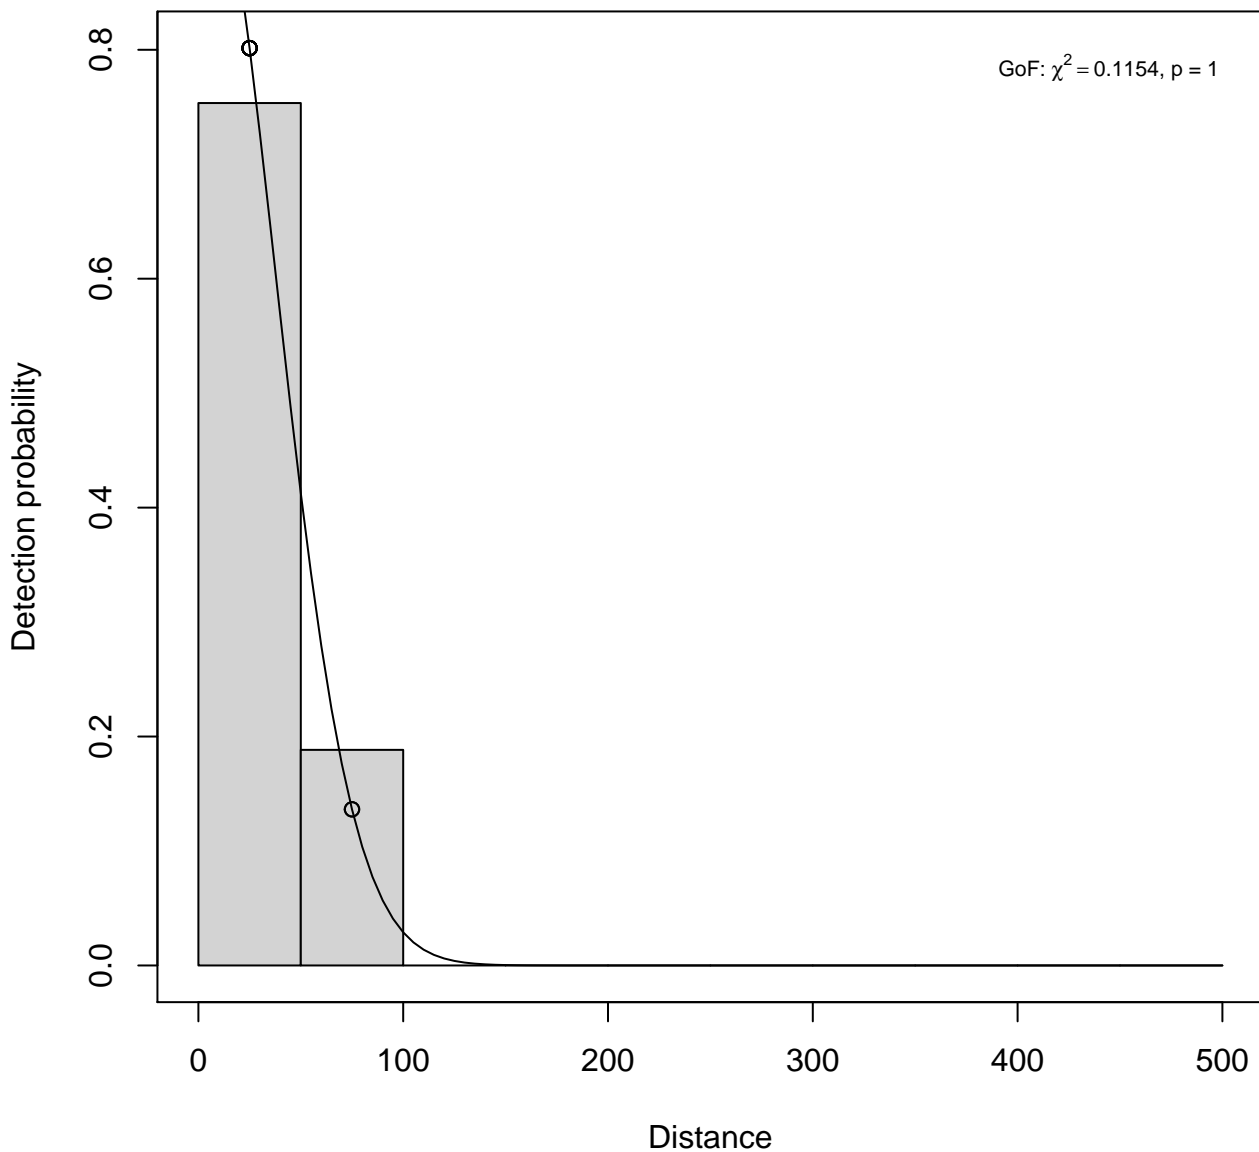

Supplement: s1 [file s1]
