# Supplementary material
Source: MDPI journal article supplement (https://www.mdpi.com/1424-2818/13/7/300)

# **Brotogeris cyanoptera – Iquitos varzea – Peru**

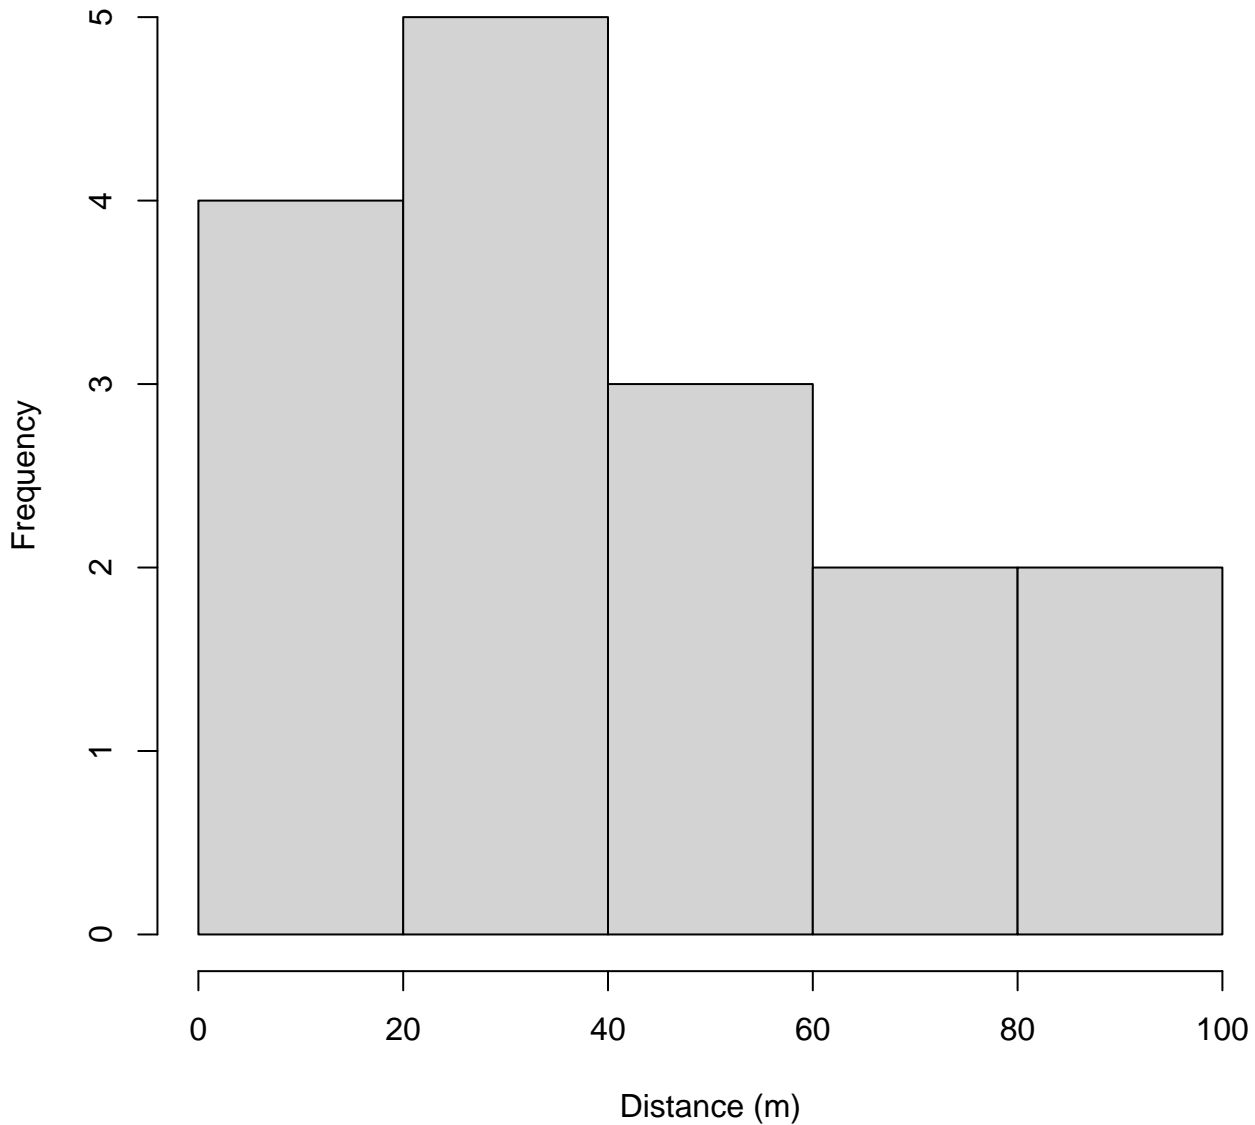

# Brotogeris cyanoptera – Iquitos varzea – Peru

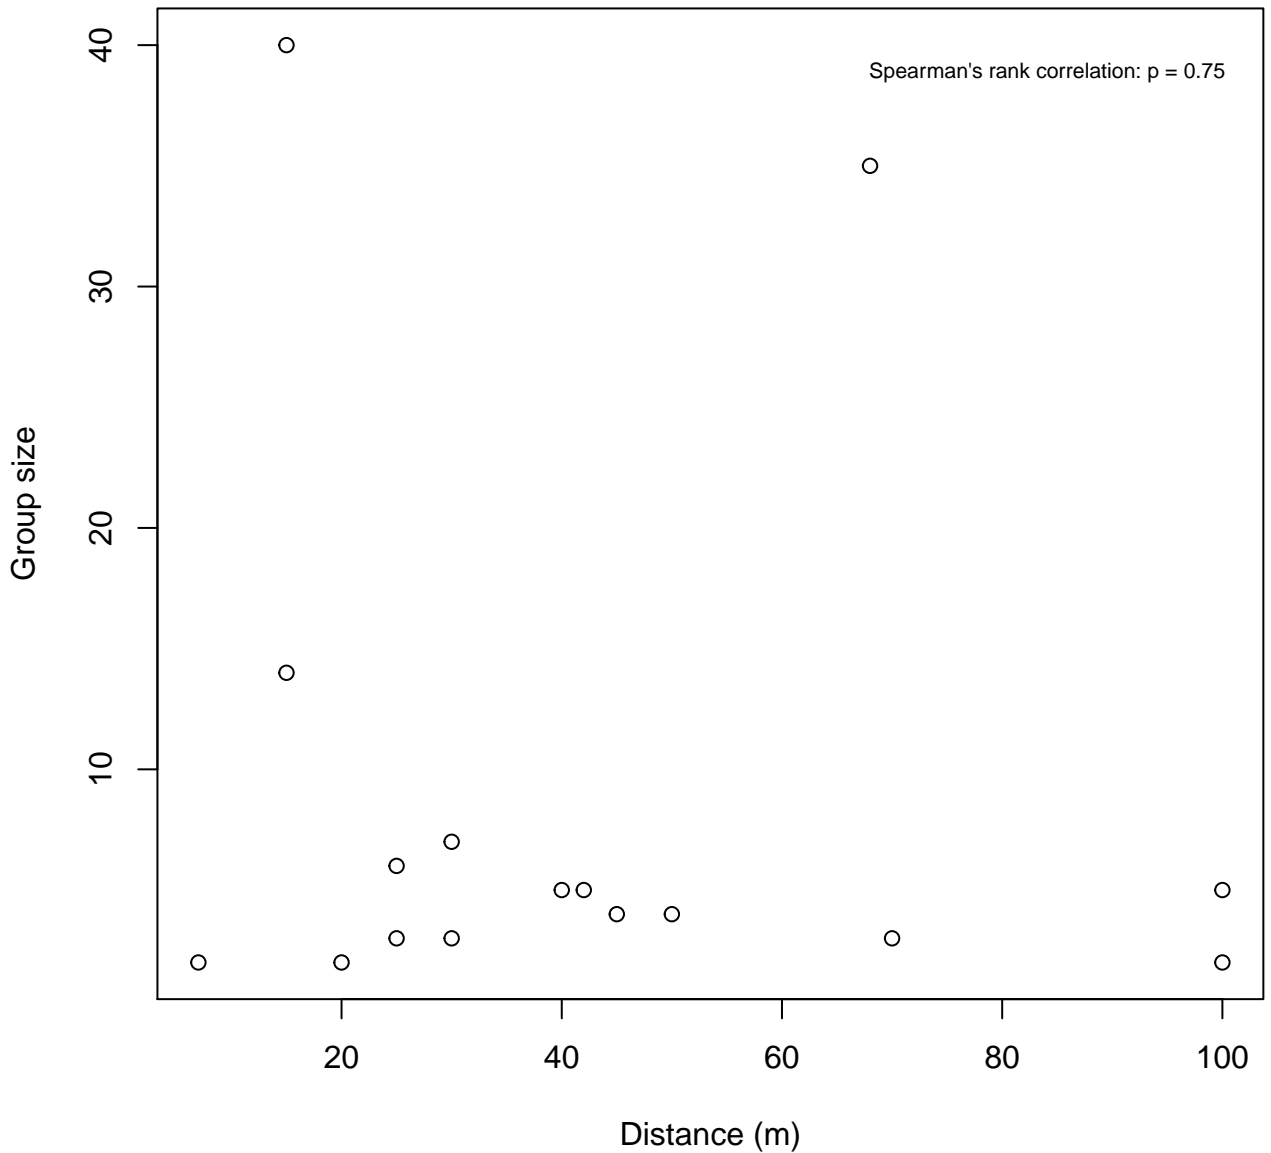

Brotogetis cyanoptera – Iquitos varzea – Peru (N = 16, key function = hn)

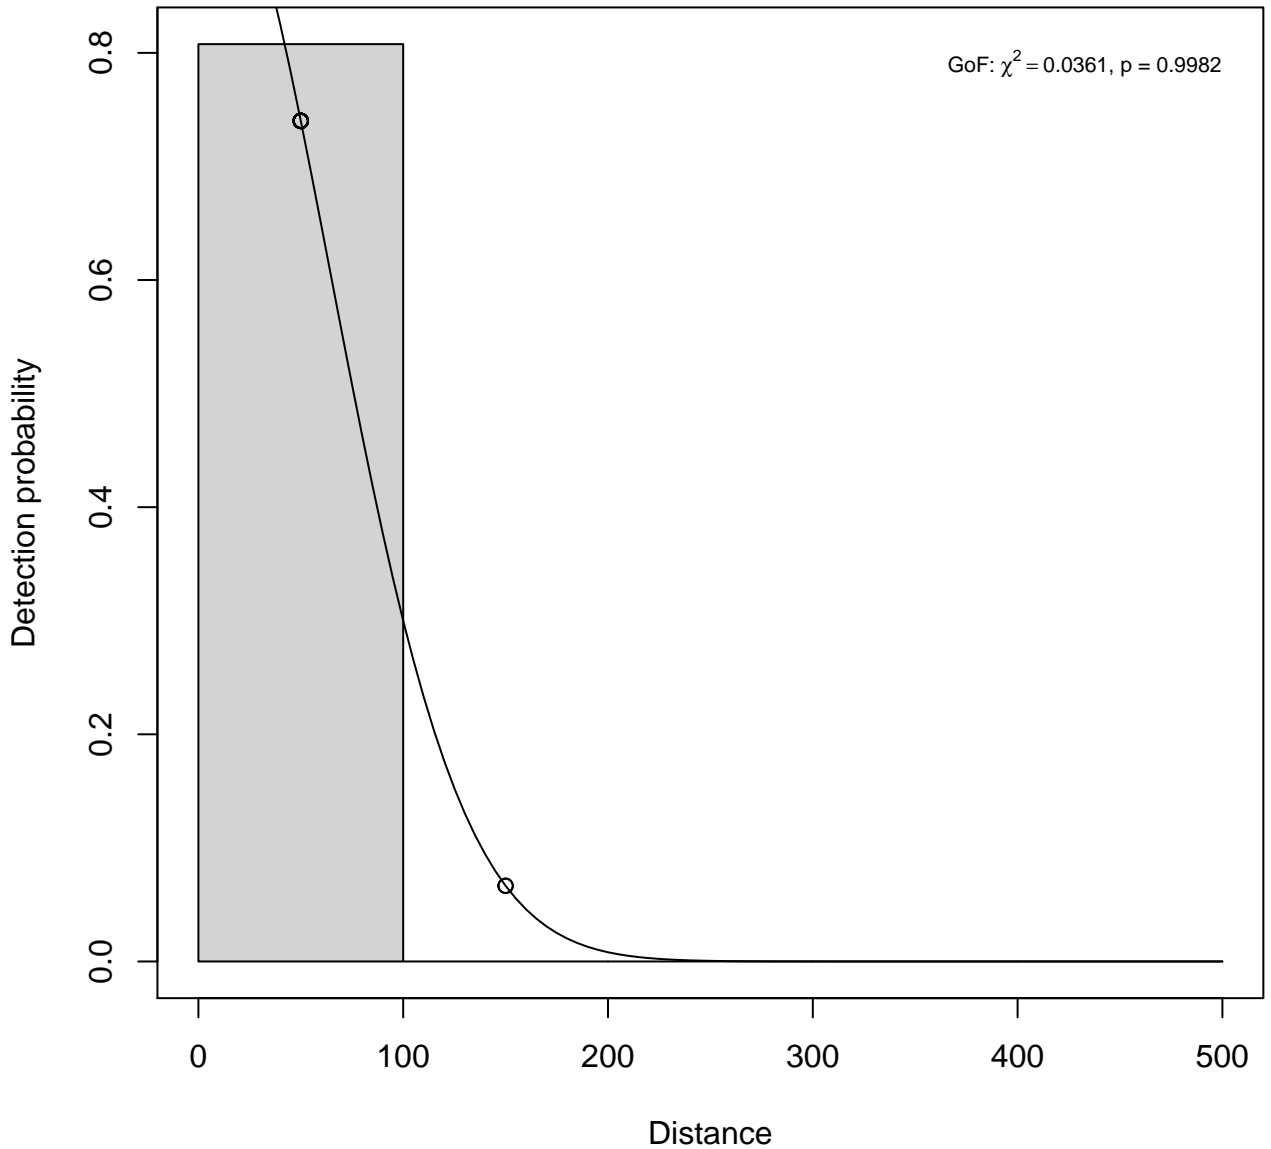

Brotogetis cyanoptera – Iquitos varzea – Peru (N = 16, key function = hn)

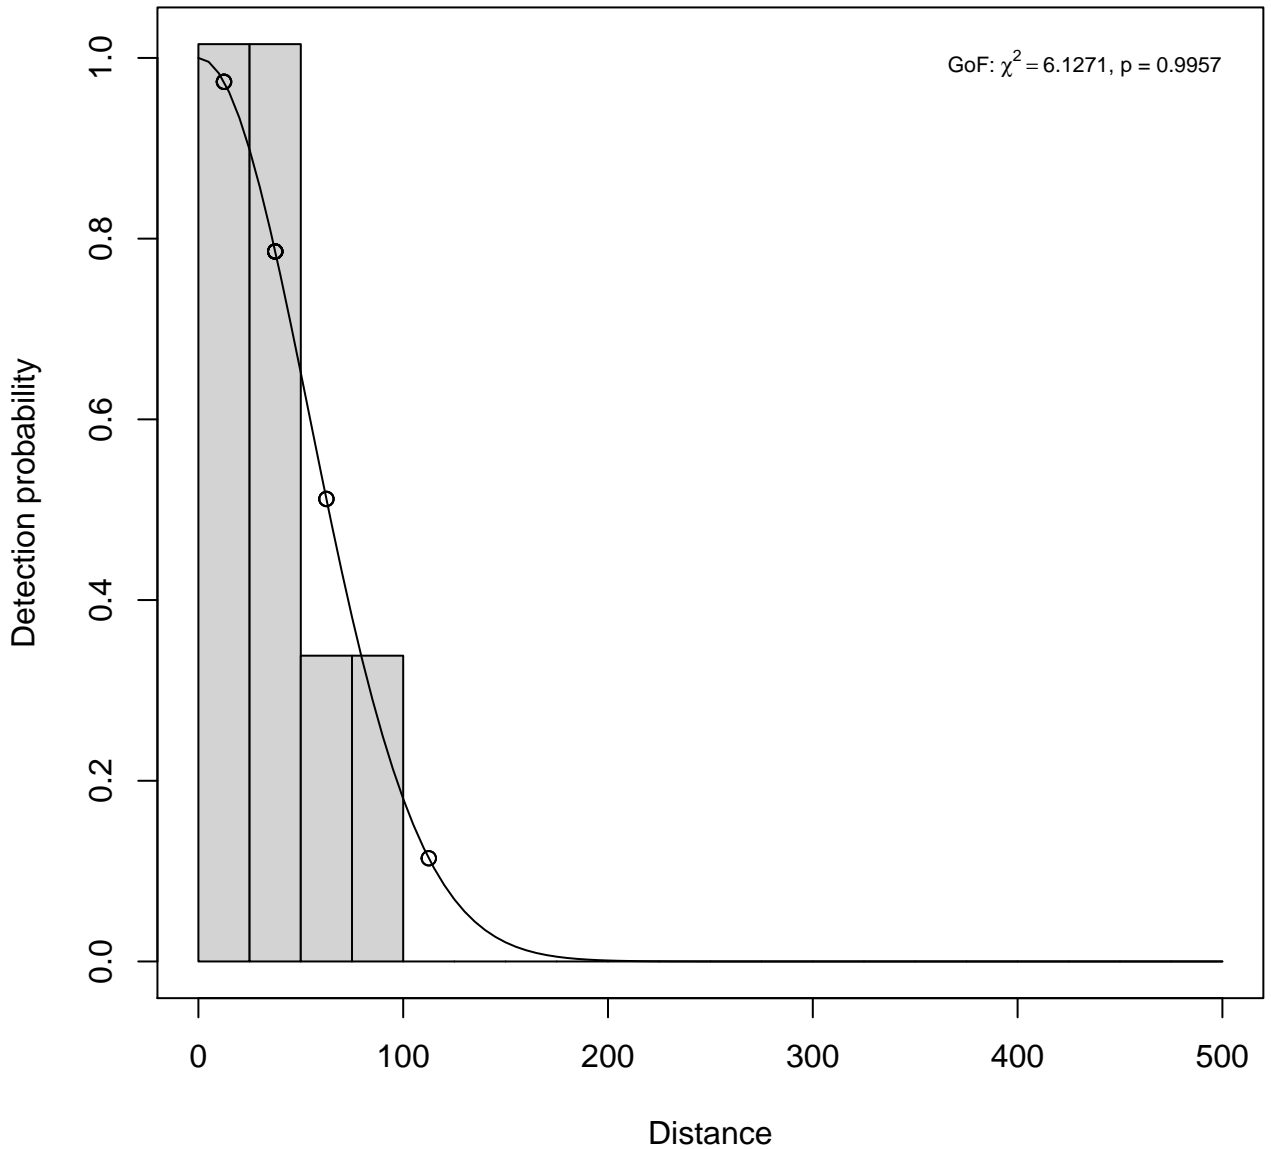

Brotogeris cyanoptera – Iquitos varzea – Peru (N = 16, key function = hn)

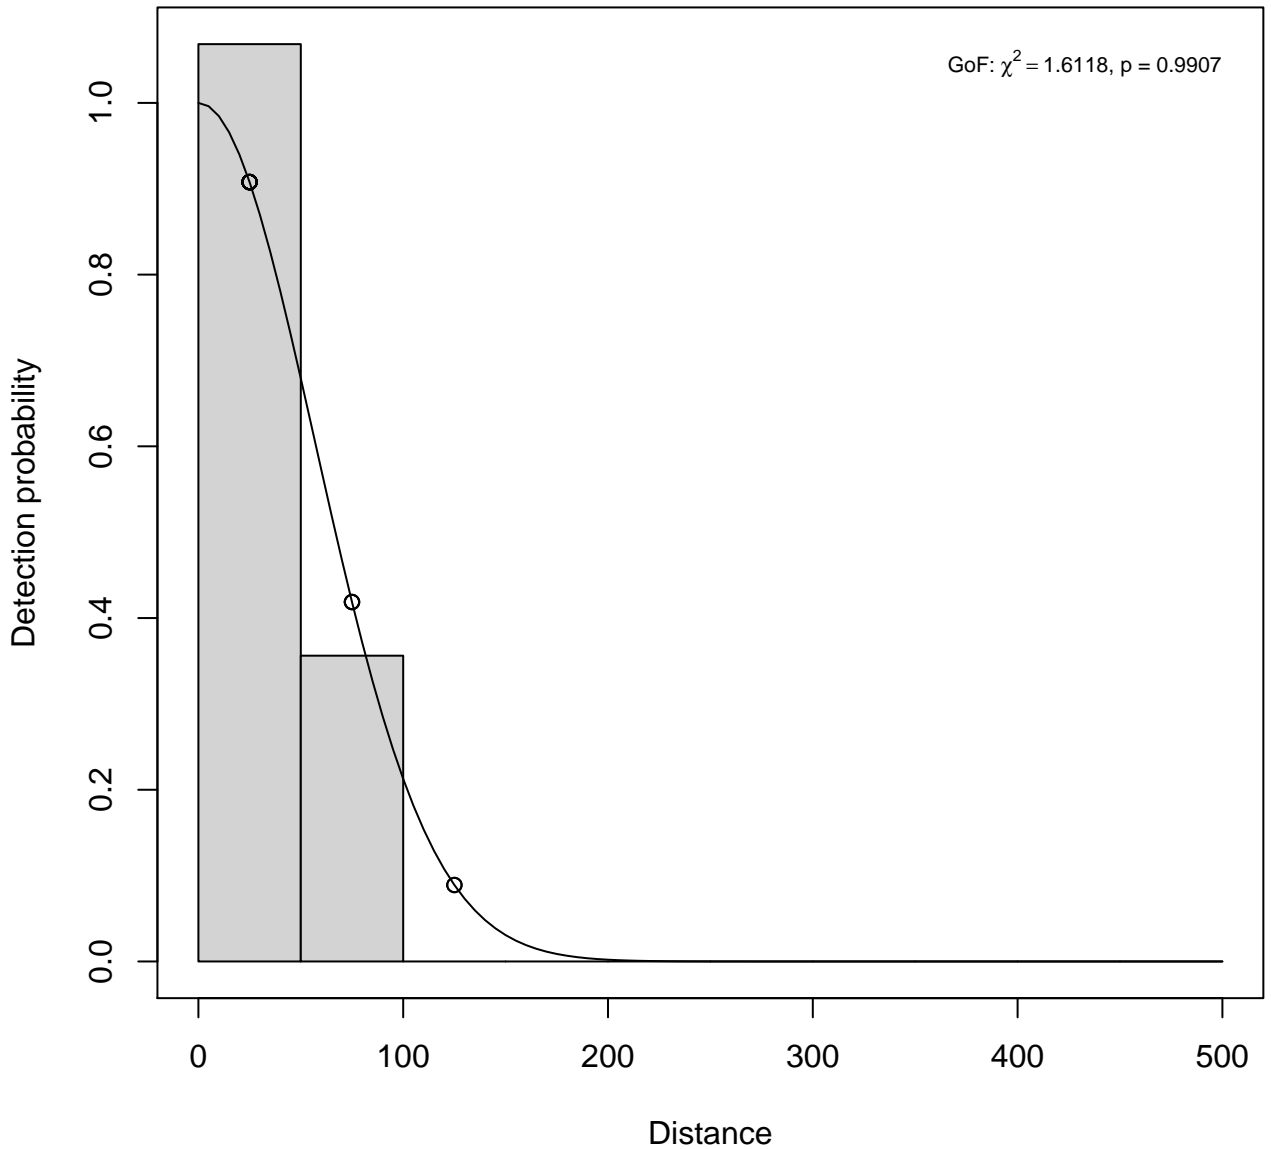

Supplement: s1 [file s1]
