# Supplementary material
Source: MDPI journal article supplement (https://www.mdpi.com/1424-2818/13/7/300)

# **Brotogetis chiriri – Xingu–Tocantins–Araguaia moist forests – Brazil**

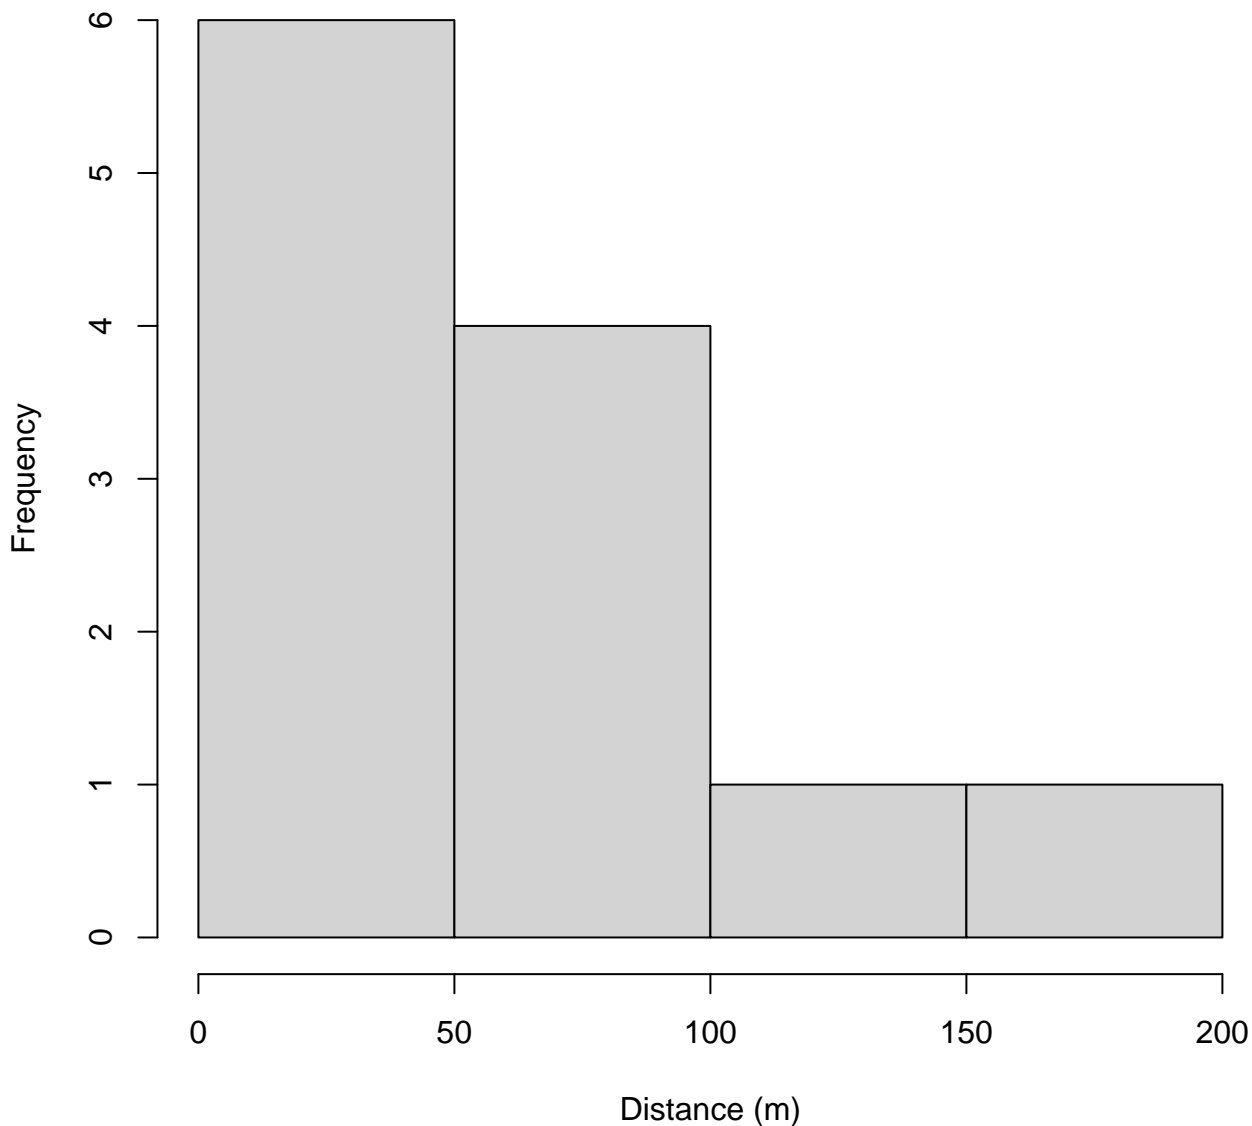

# Brotogetis chiriri – Xingu–Tocantins–Araguaia moist forests – Brazil

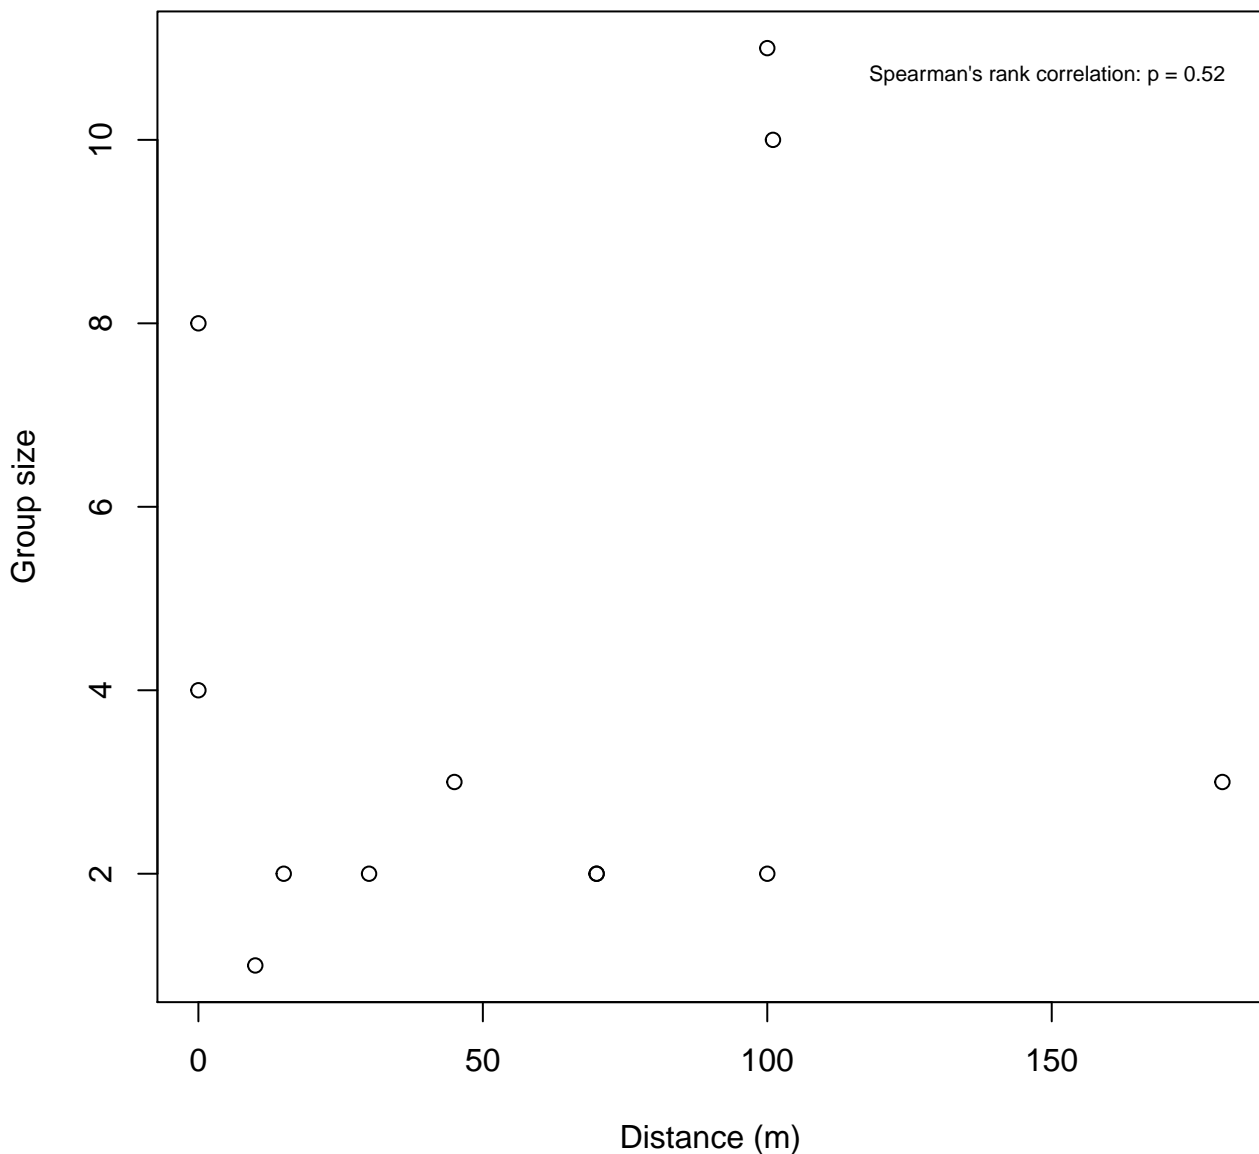

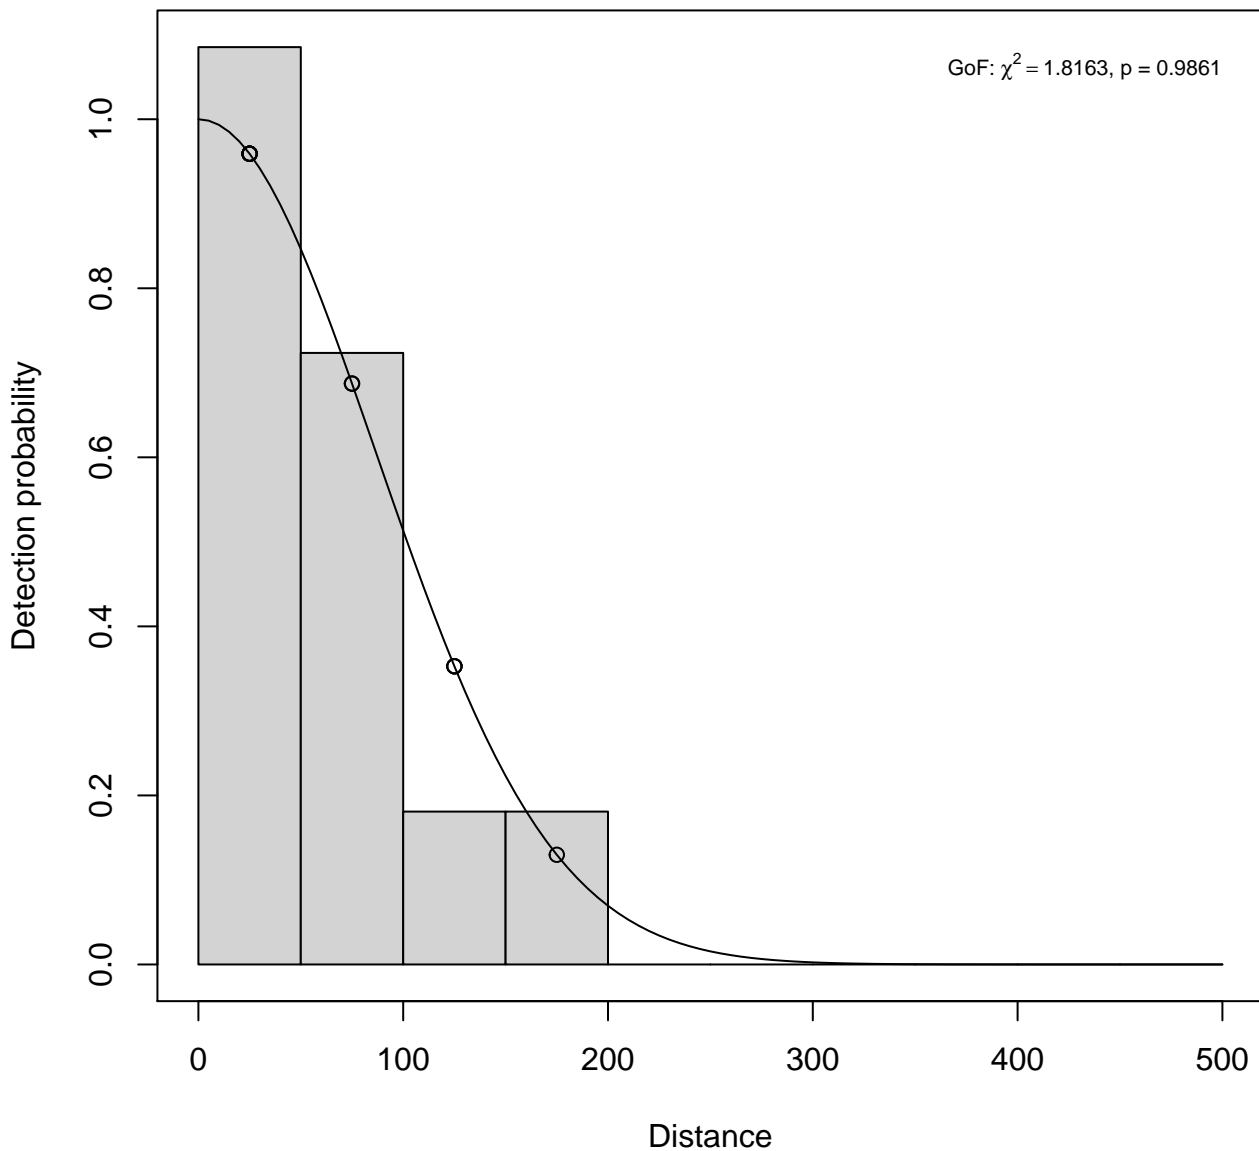

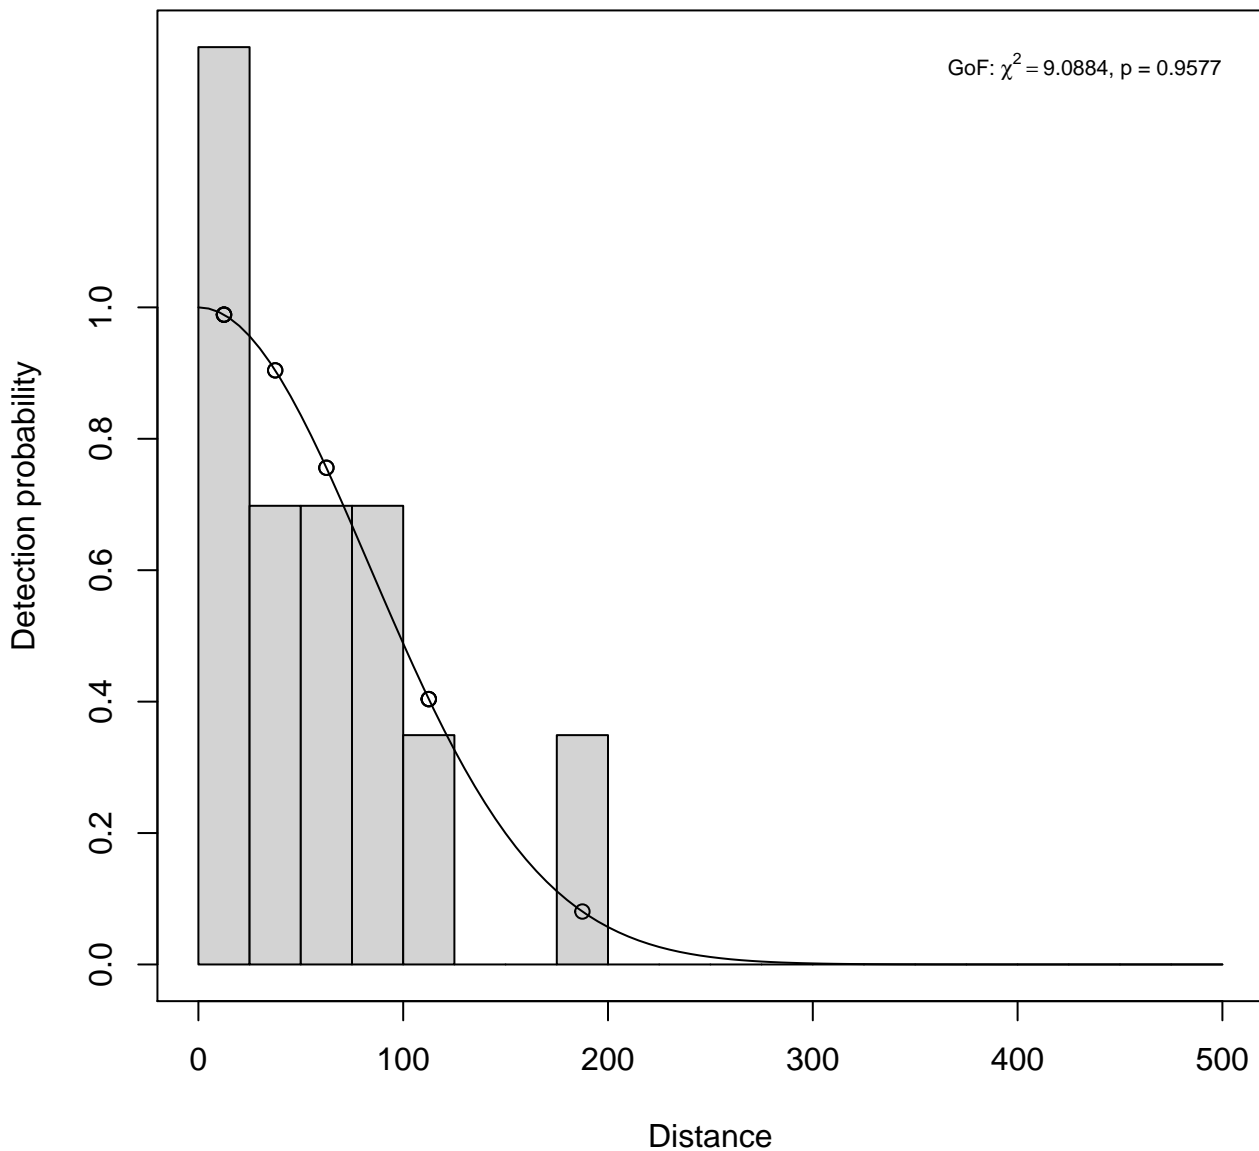

Brotogetis chiriri – Xingu–Tocantins–Araguaia moist forests – Brazil (N = 12, key function = hn)

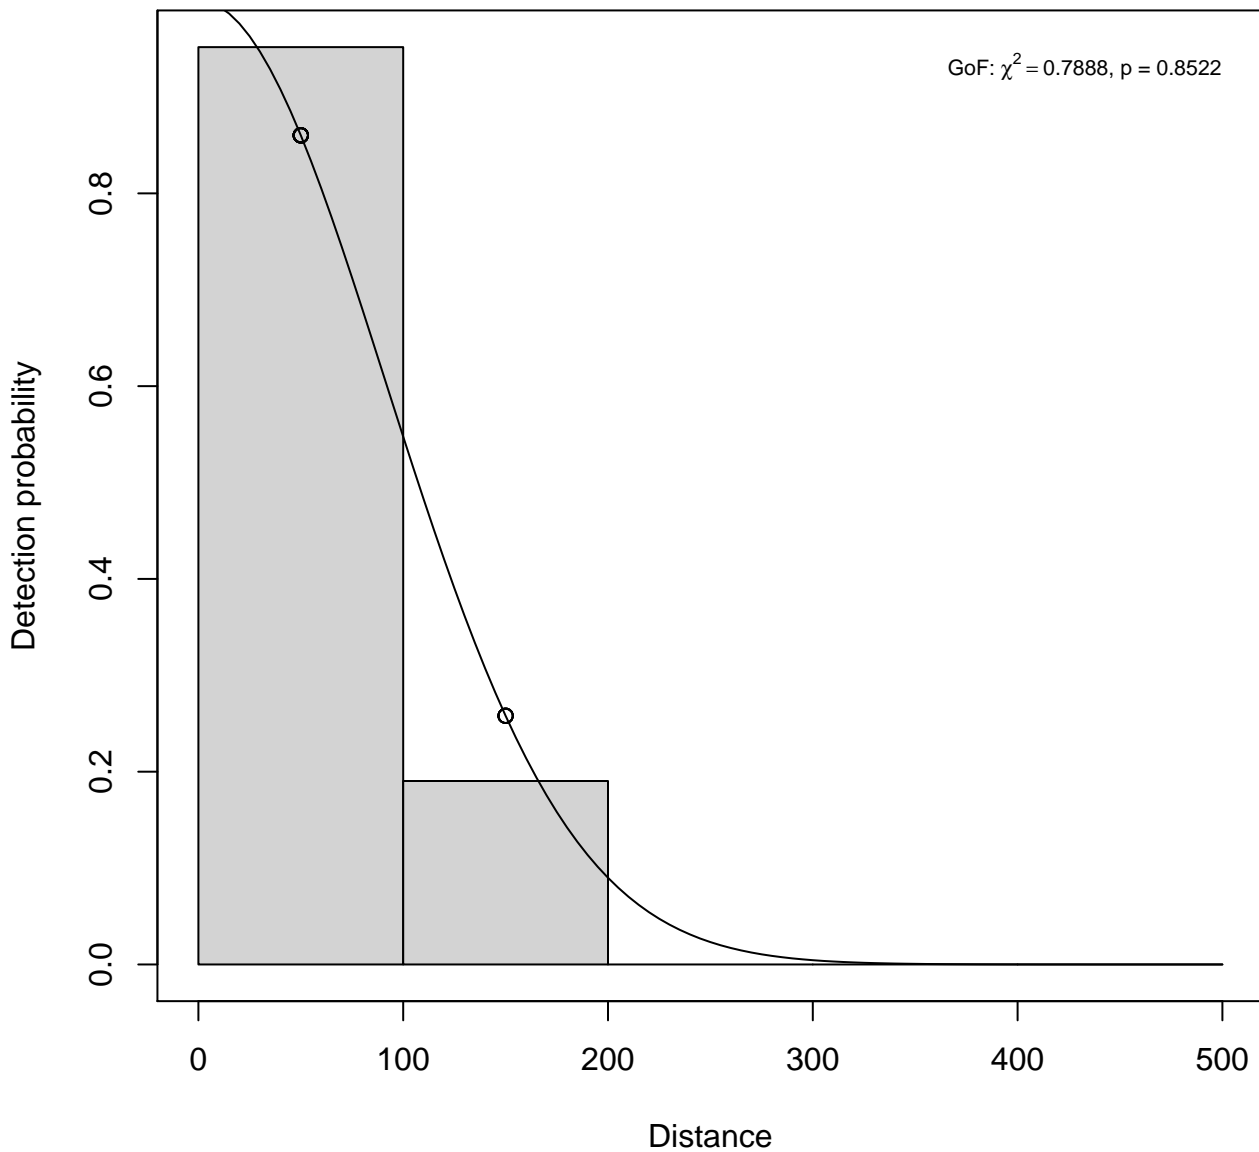

Supplement: s1 [file s1]
