# Supplementary material
Source: MDPI journal article supplement (https://www.mdpi.com/1424-2818/13/7/300)

# **Psittacara leucophthalmus – Araucaria moist forests – Brazil**

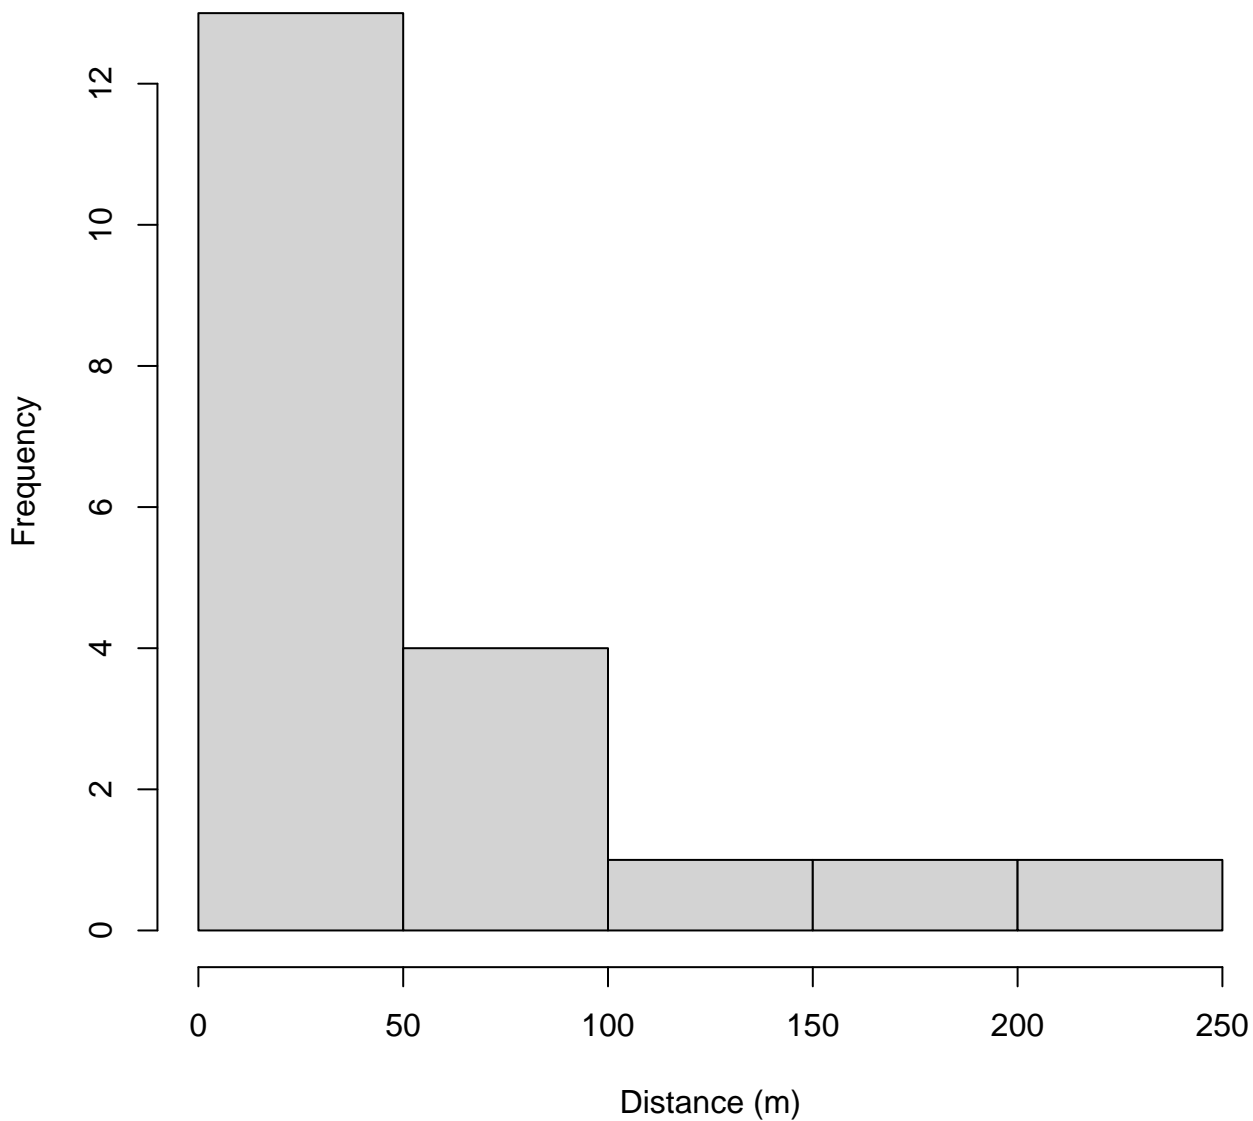

# Psittacara leucophthalmus – Araucaria moist forests – Brazil

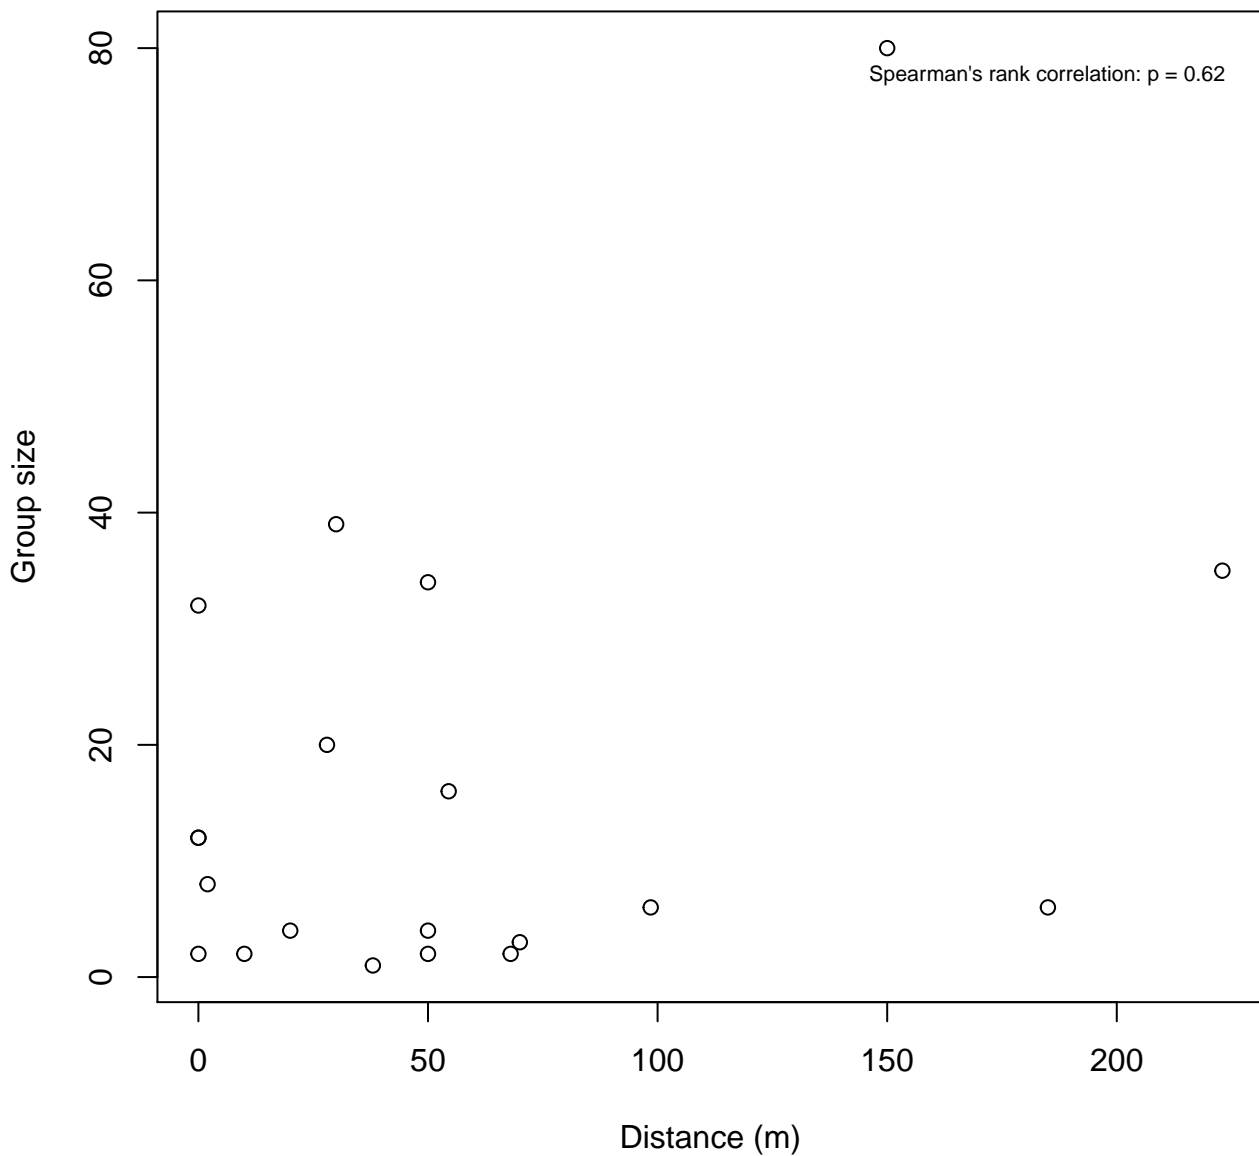

Psittacara leucophthalmus – Araucaria moist forests – Brazil (N = 20, key function = hn)

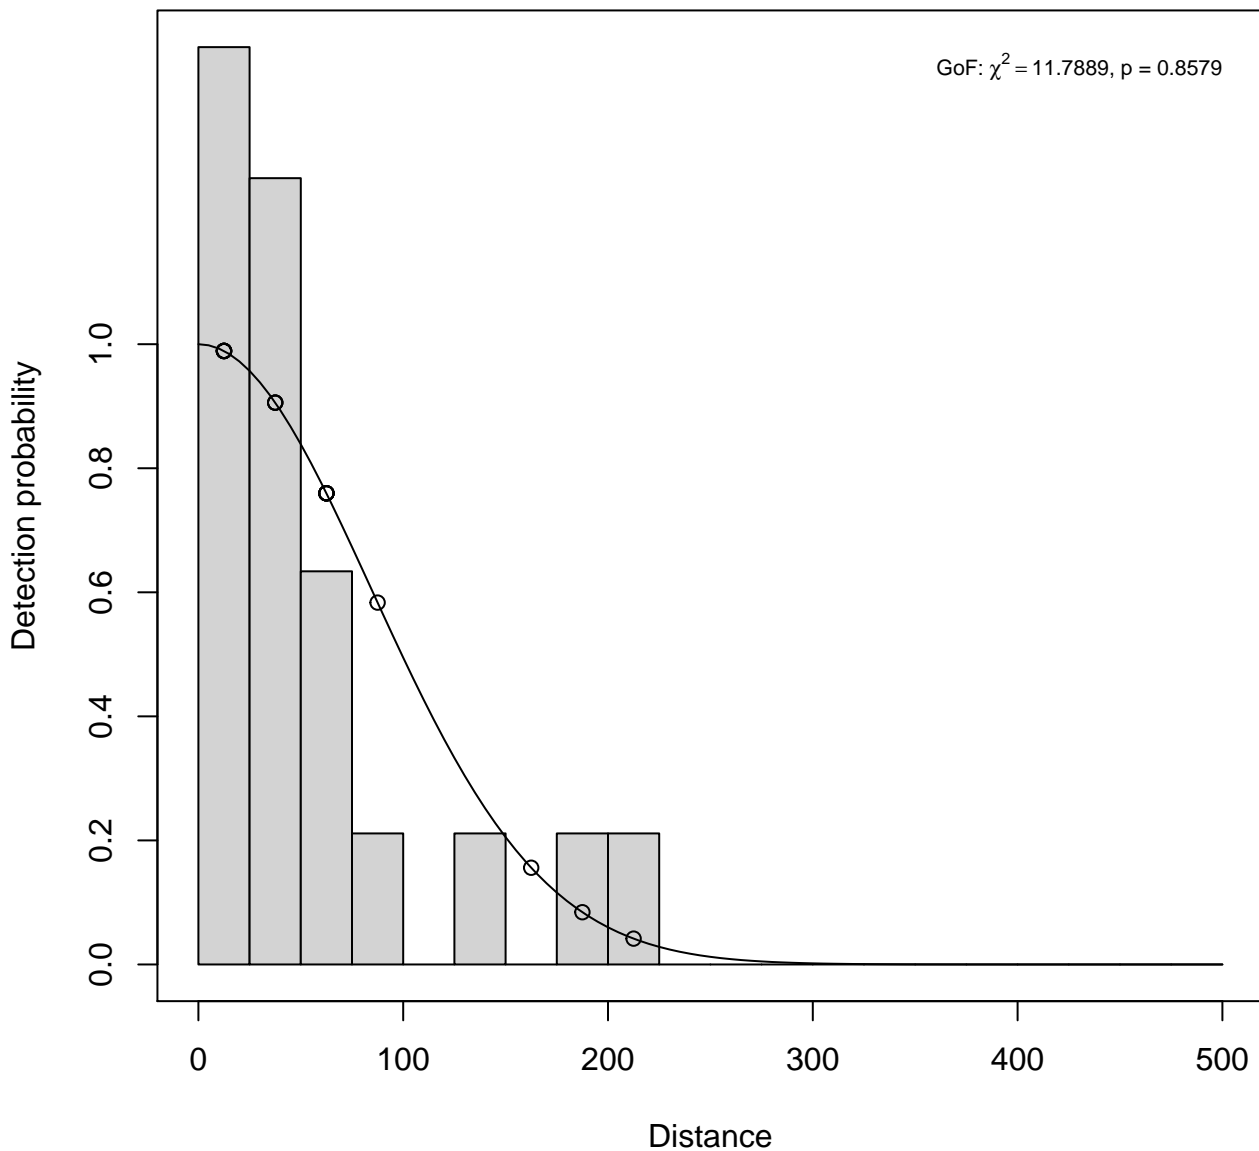

*Psittacara leucophthalmus* – Araucaria moist forests – Brazil (N = 20, key function = hn)

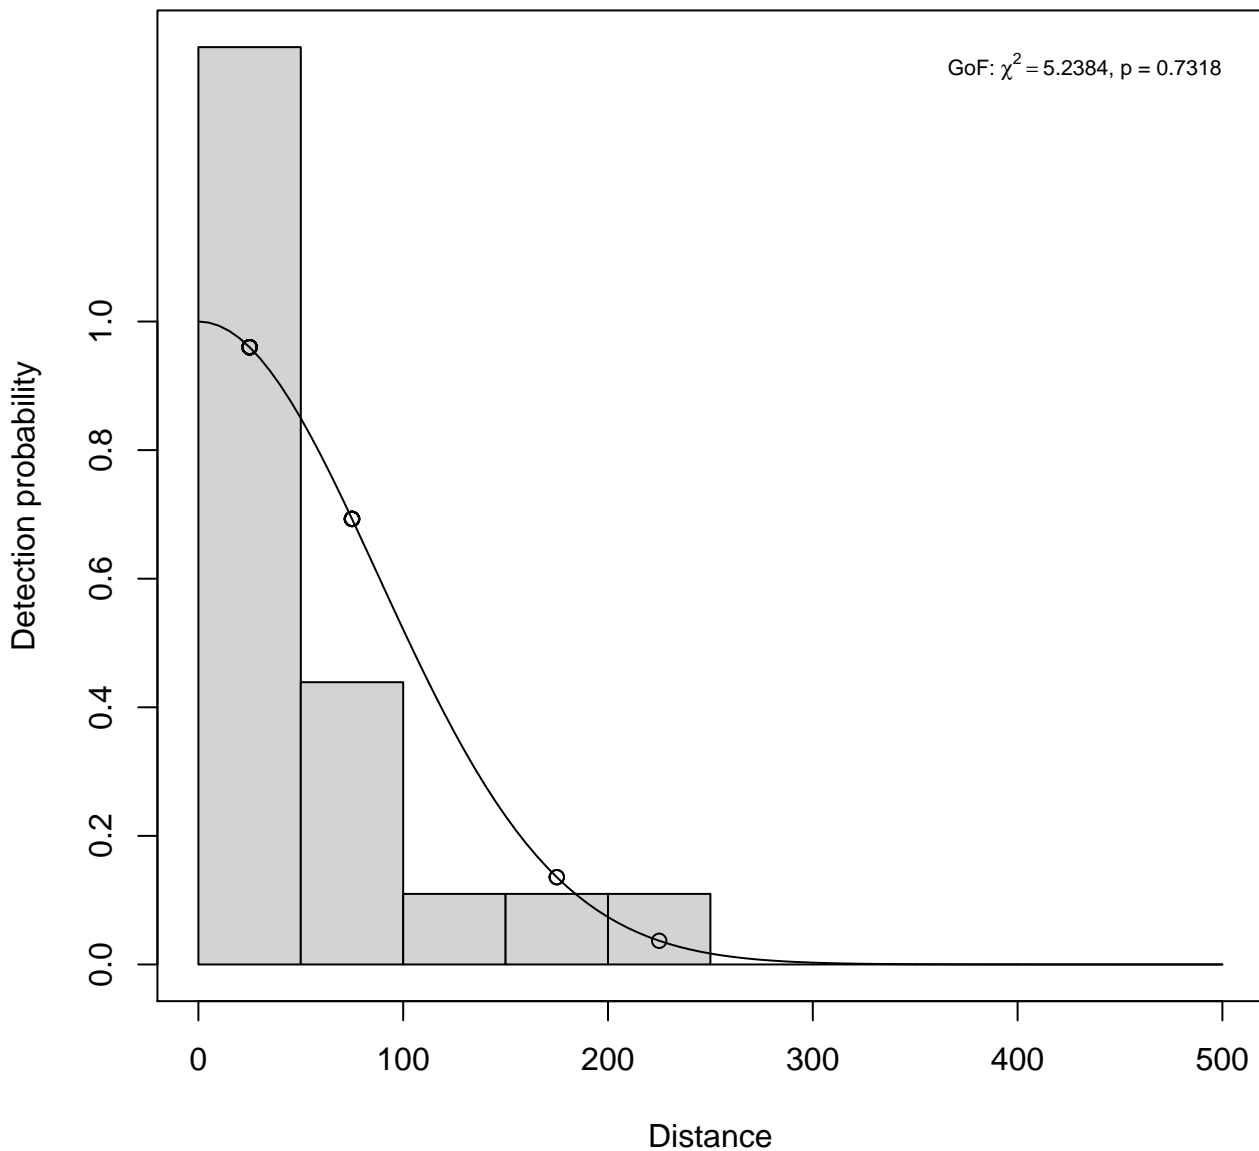

*Psittacara leucophthalmus* – Araucaria moist forests – Brazil (N = 20, key function = hn)

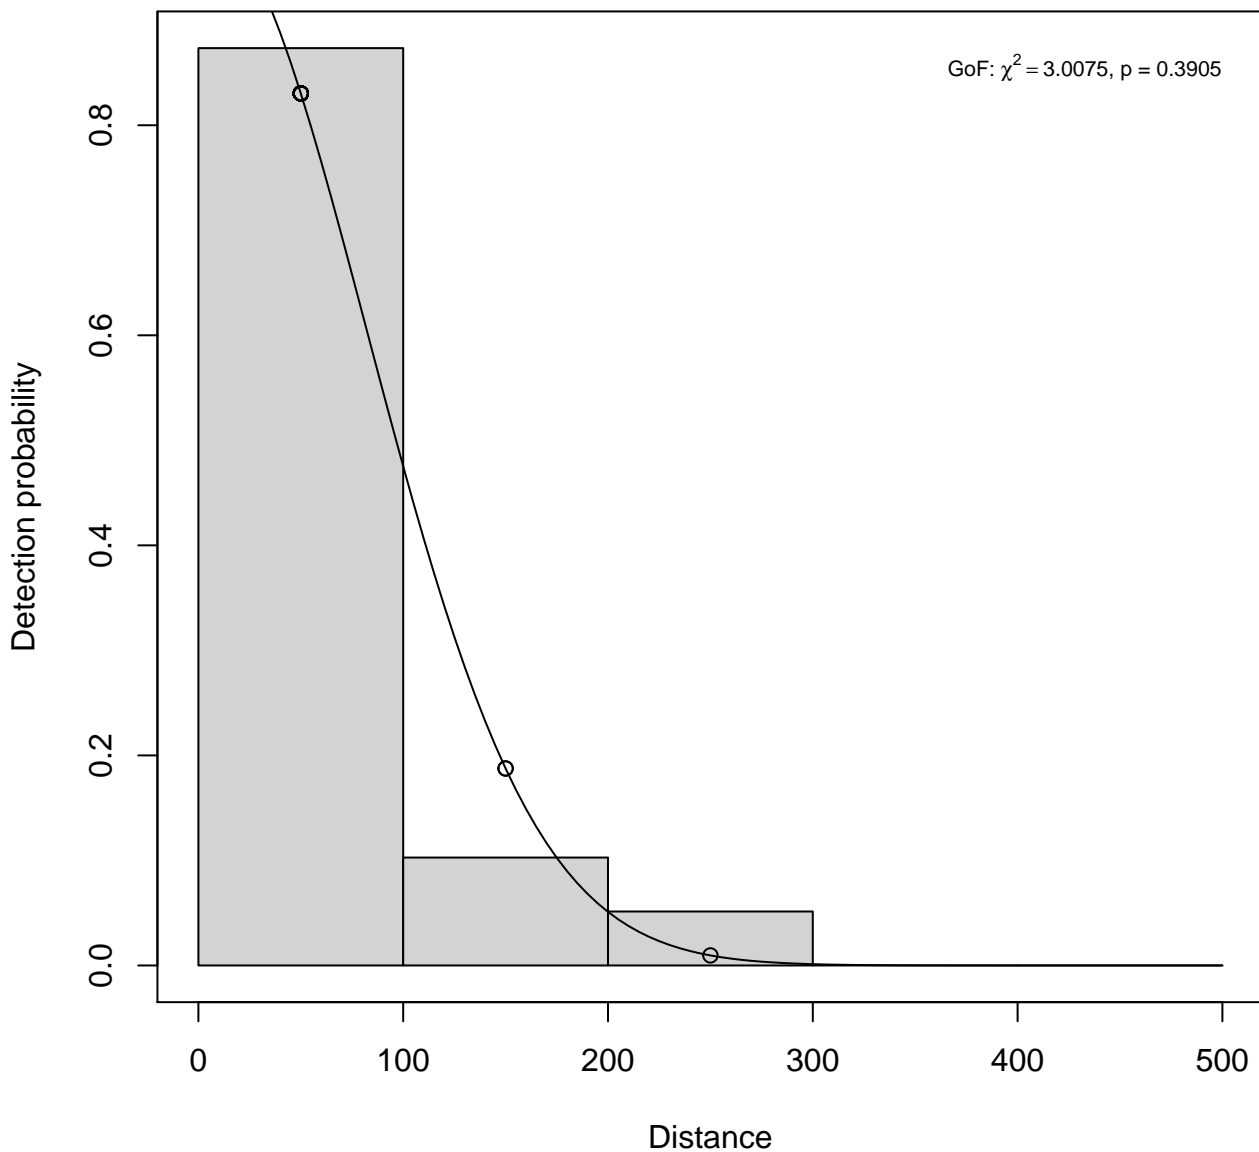

Supplement: s1 [file s1]
