# Supplementary material
Source: MDPI journal article supplement (https://www.mdpi.com/1424-2818/13/7/300)

# **Ara ararauna – Chiquitano dry forests – Brazil**

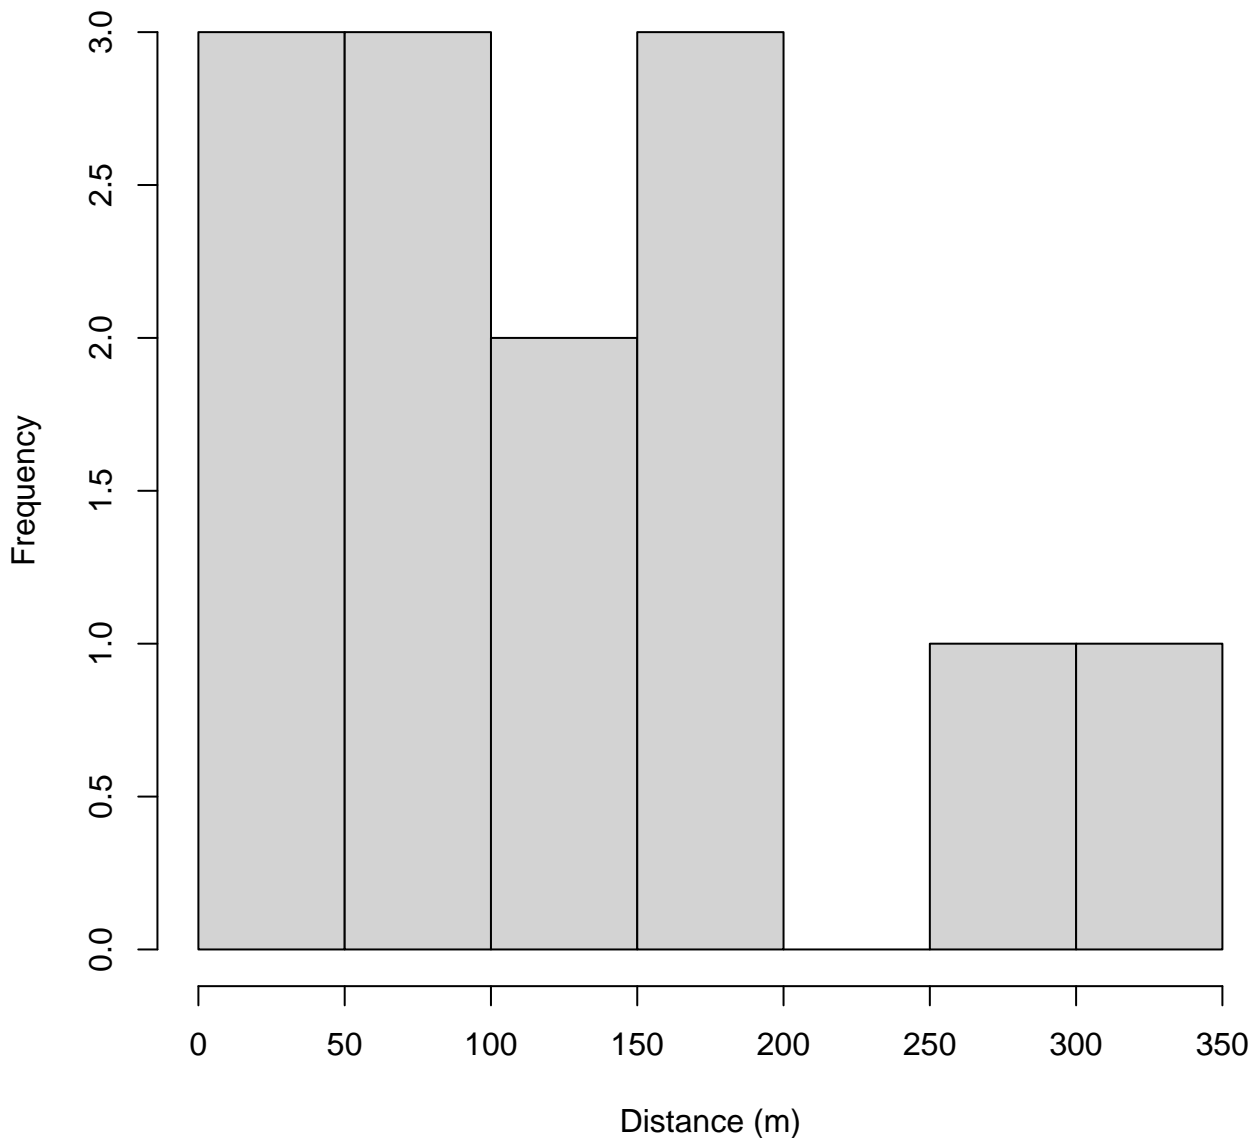

## Ara ararauna – Chiquitano dry forests – Brazil

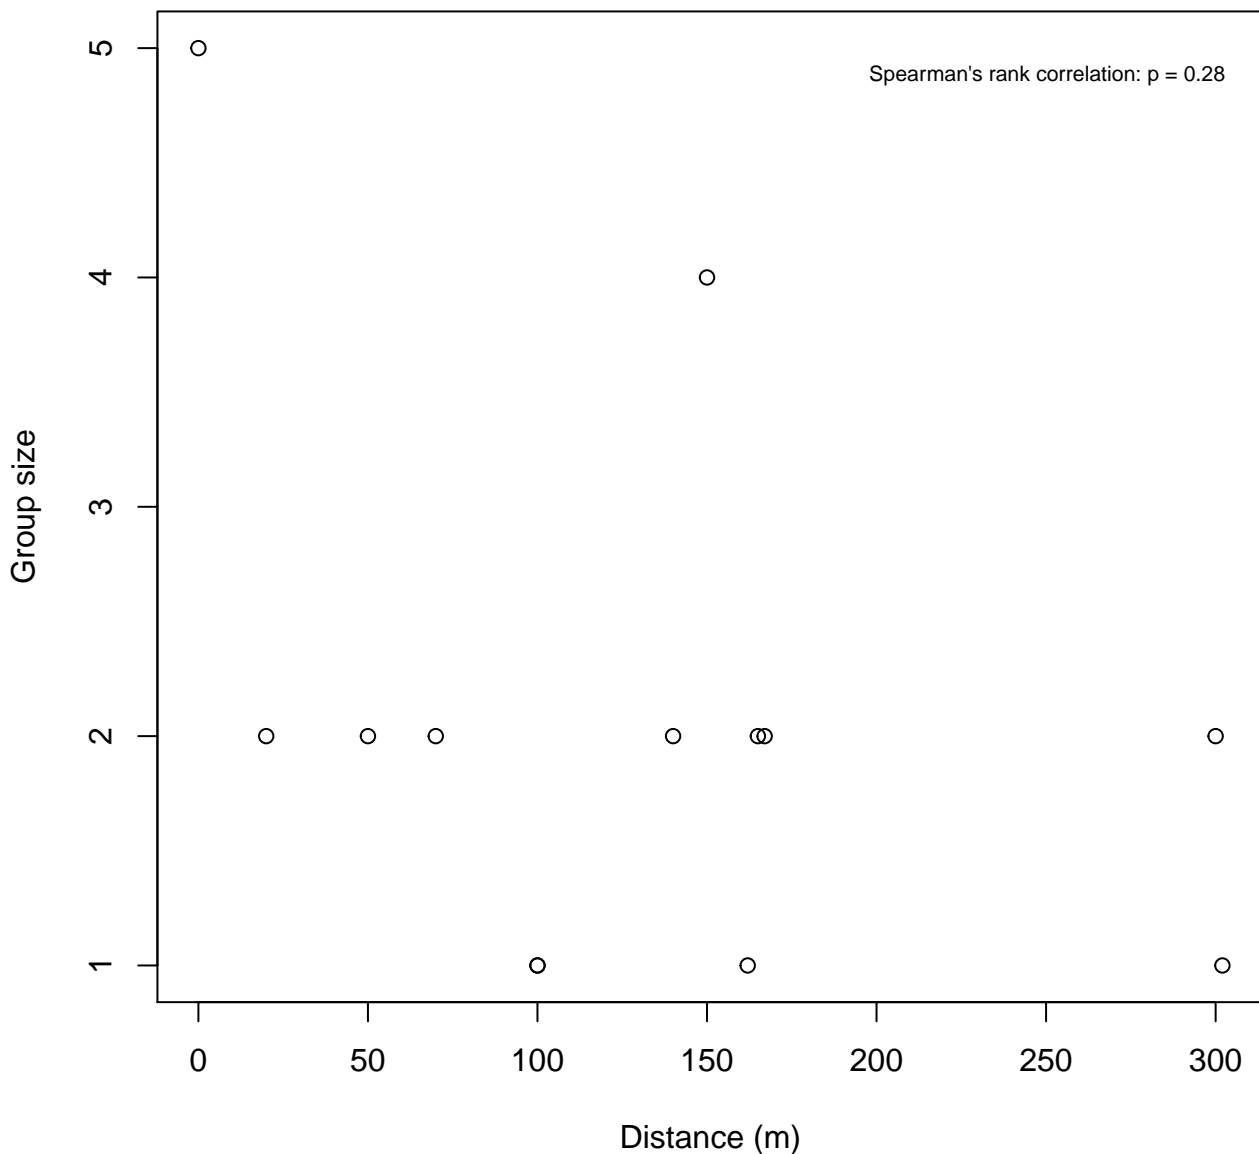

Ara ararauna – Chiquitano dry forests – Brazil (N = 13, key function = unif)

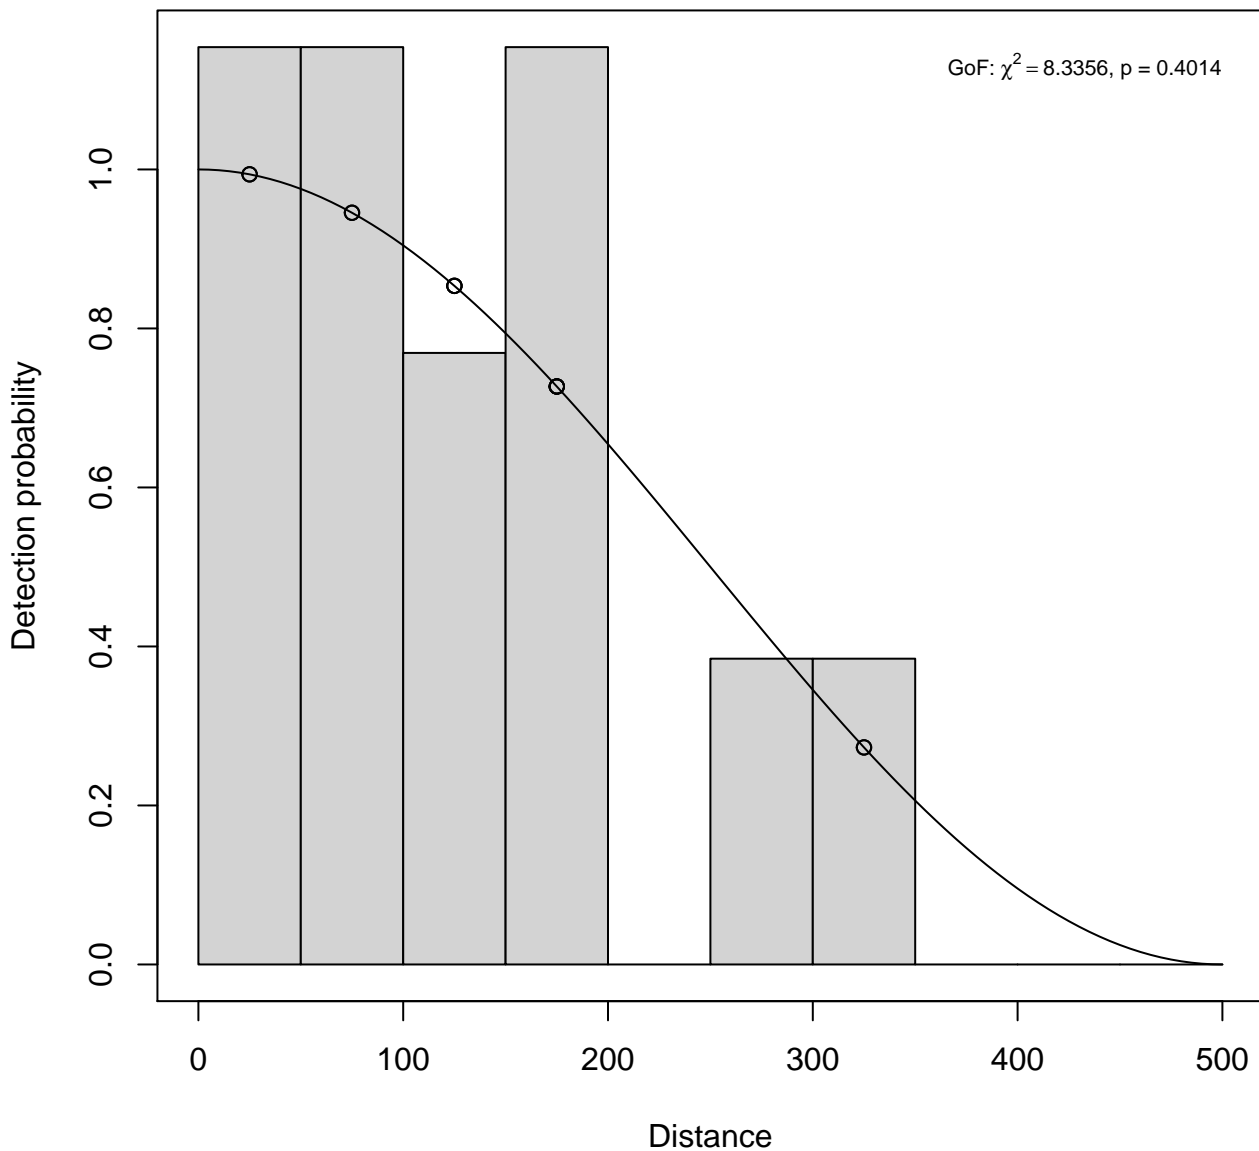

Ara ararauna – Chiquitano dry forests – Brazil (N = 13, key function = unif)

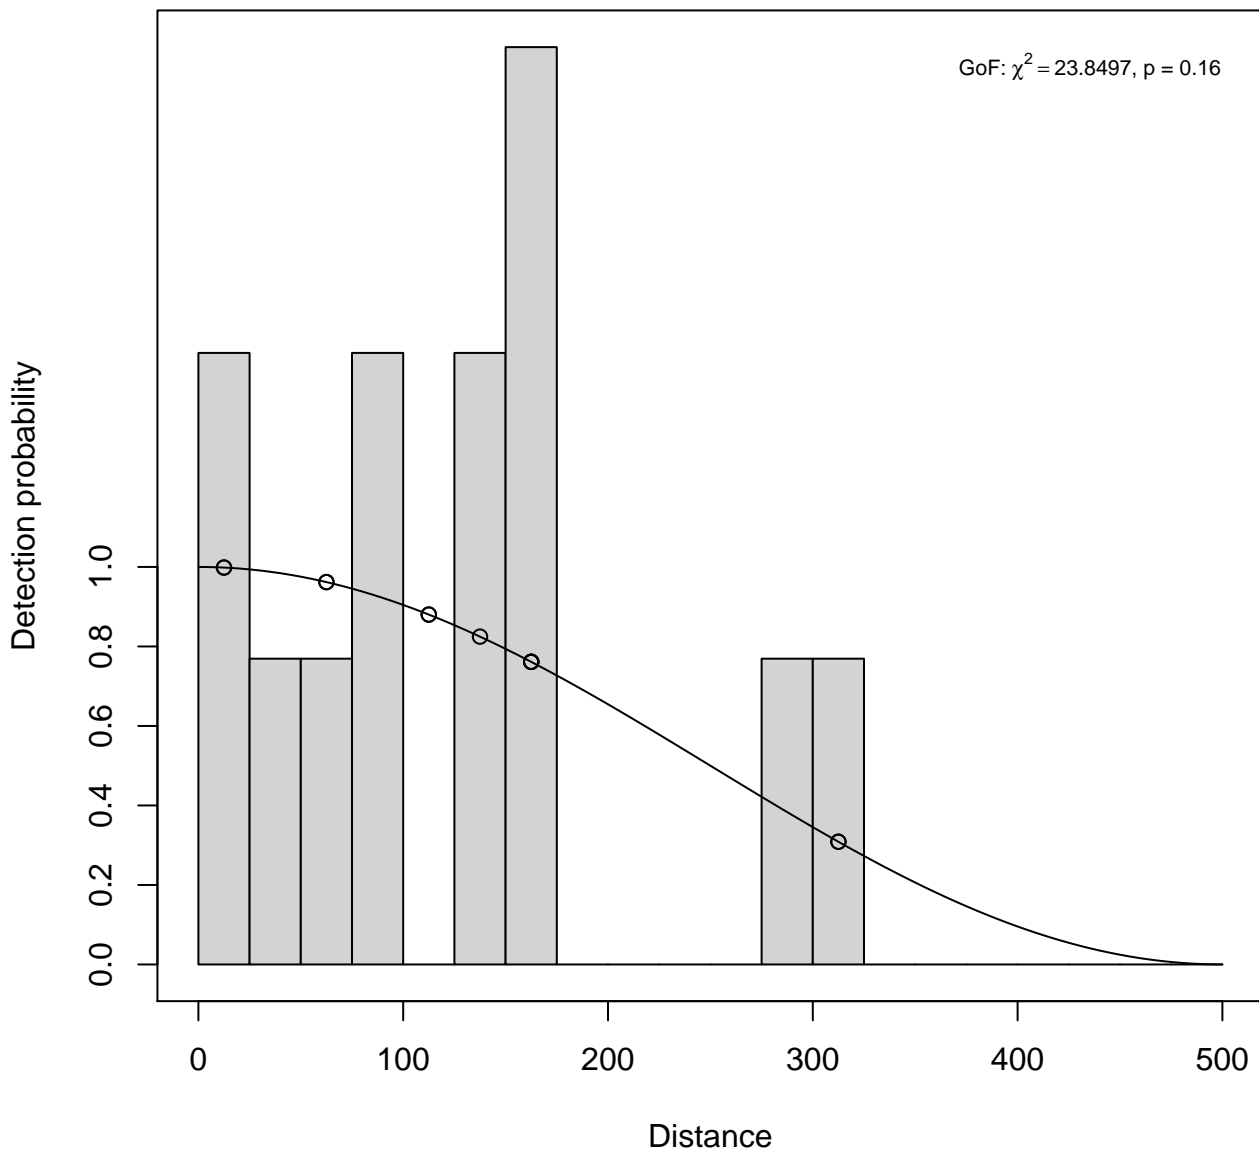

Ara ararauna – Chiquitano dry forests – Brazil (N = 13, key function = unif)

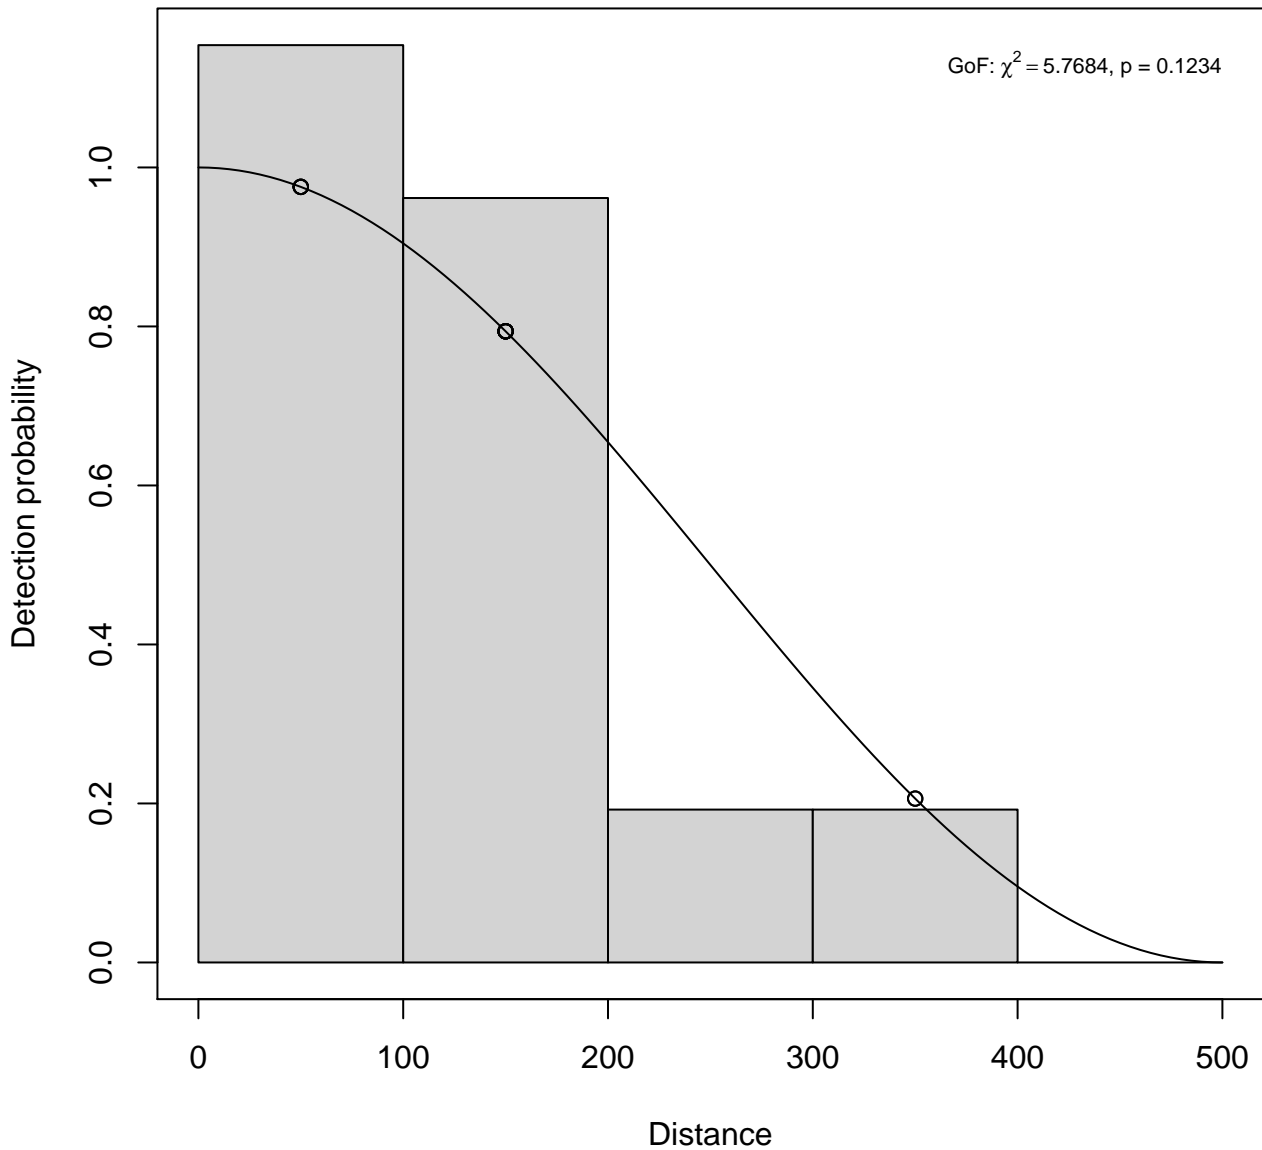

Supplement: s1 [file s1]
