# Supplementary material
Source: MDPI journal article supplement (https://www.mdpi.com/1424-2818/13/7/300)

# **Cacatua galerita – Eastern Australian temperate forests – Australia**

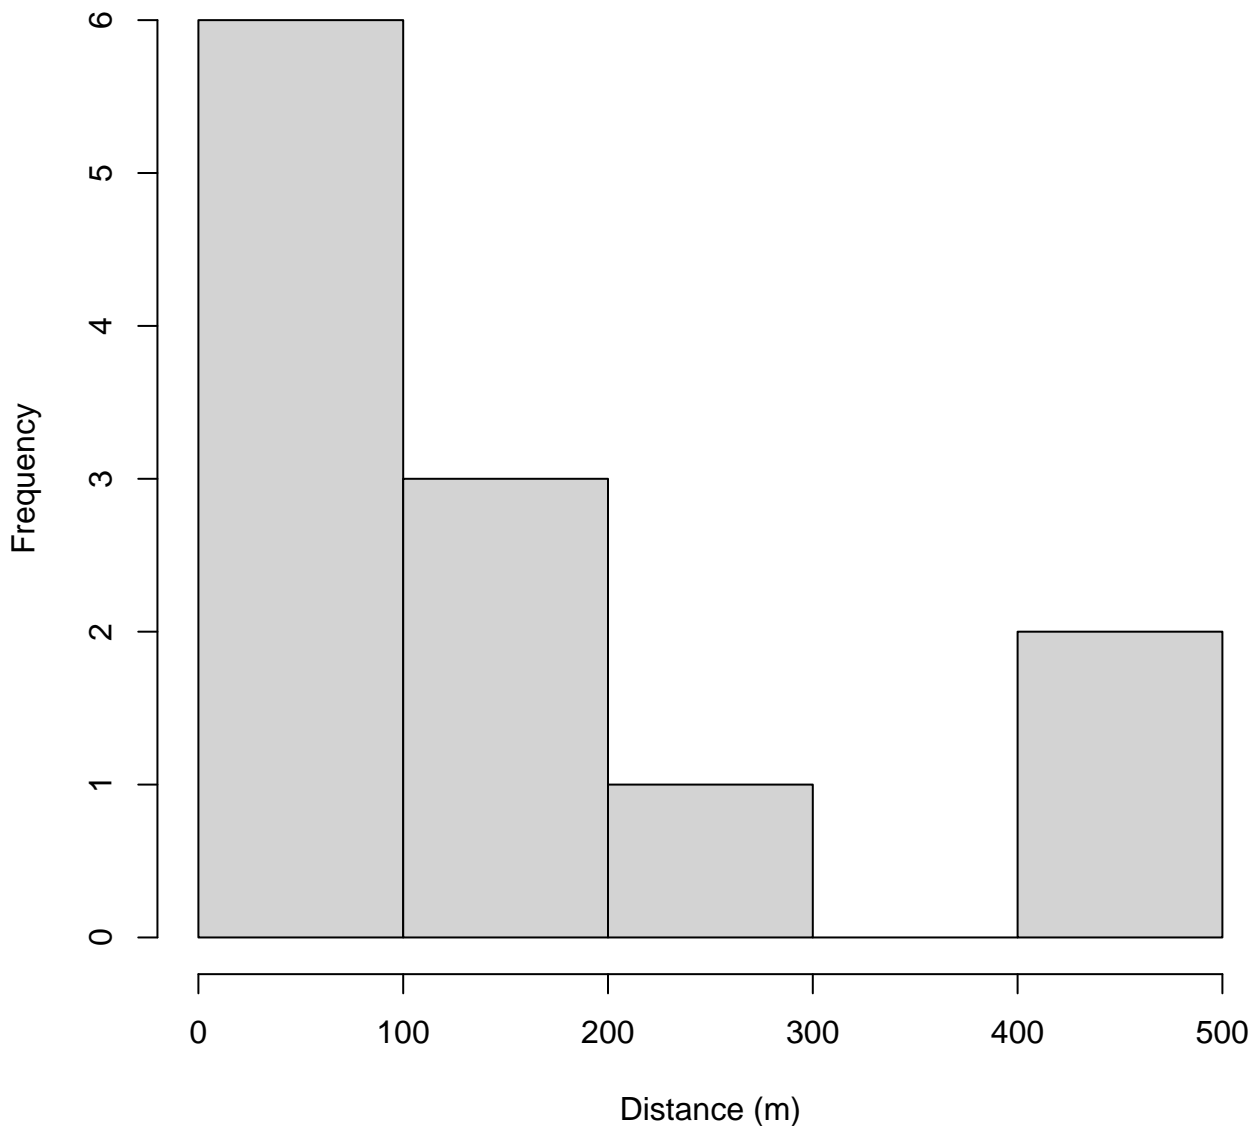

# **Cacatua galerita – Eastern Australian temperate forests – Australia**

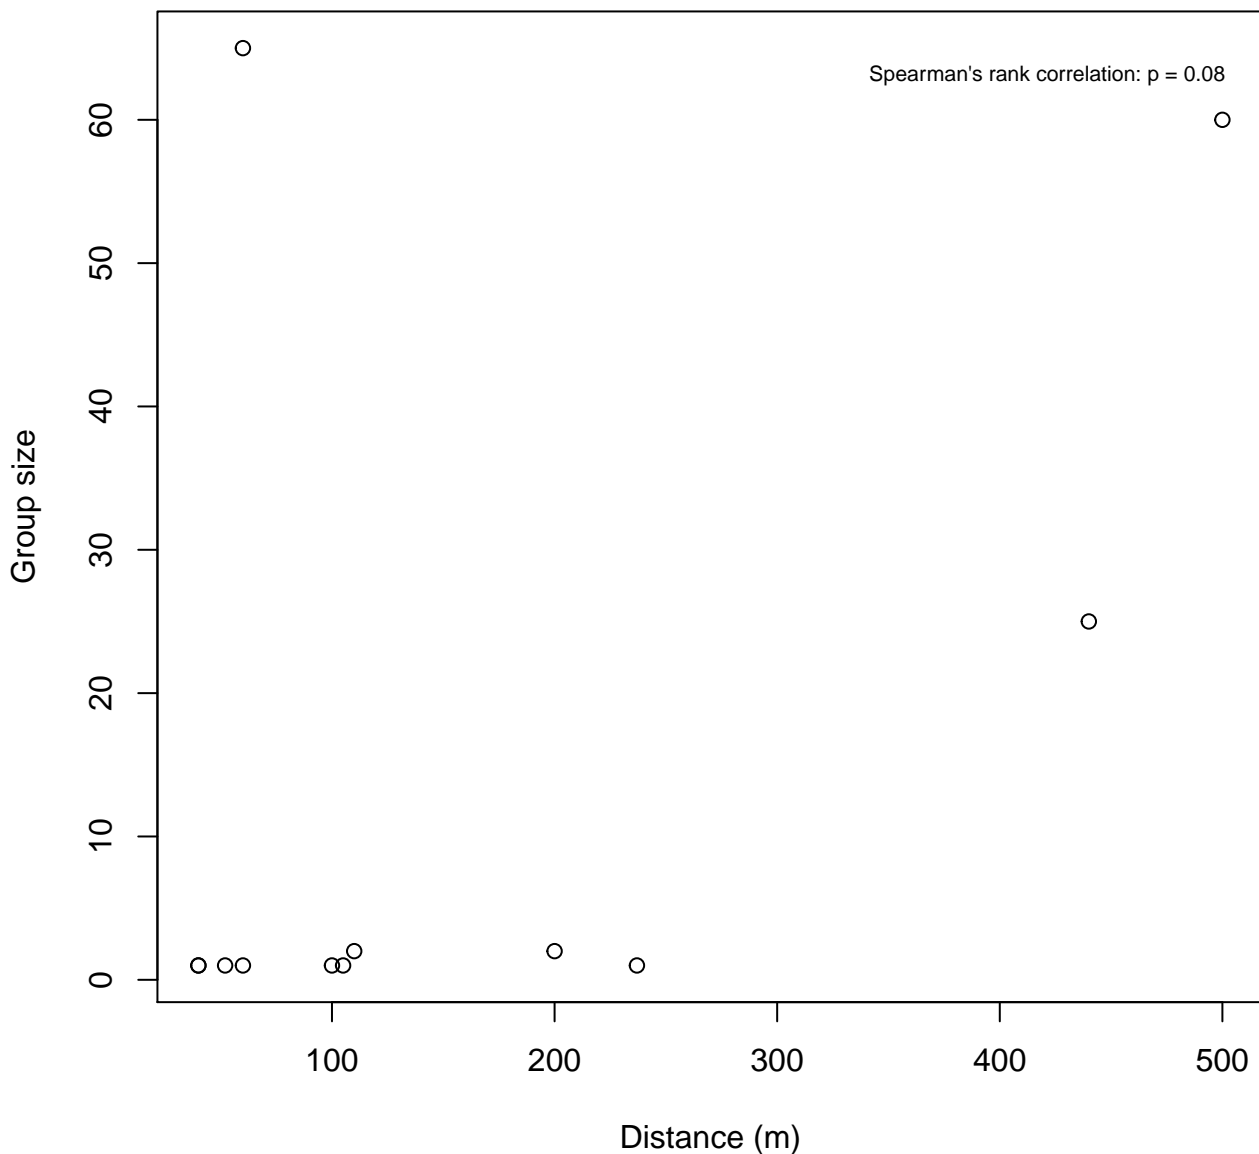

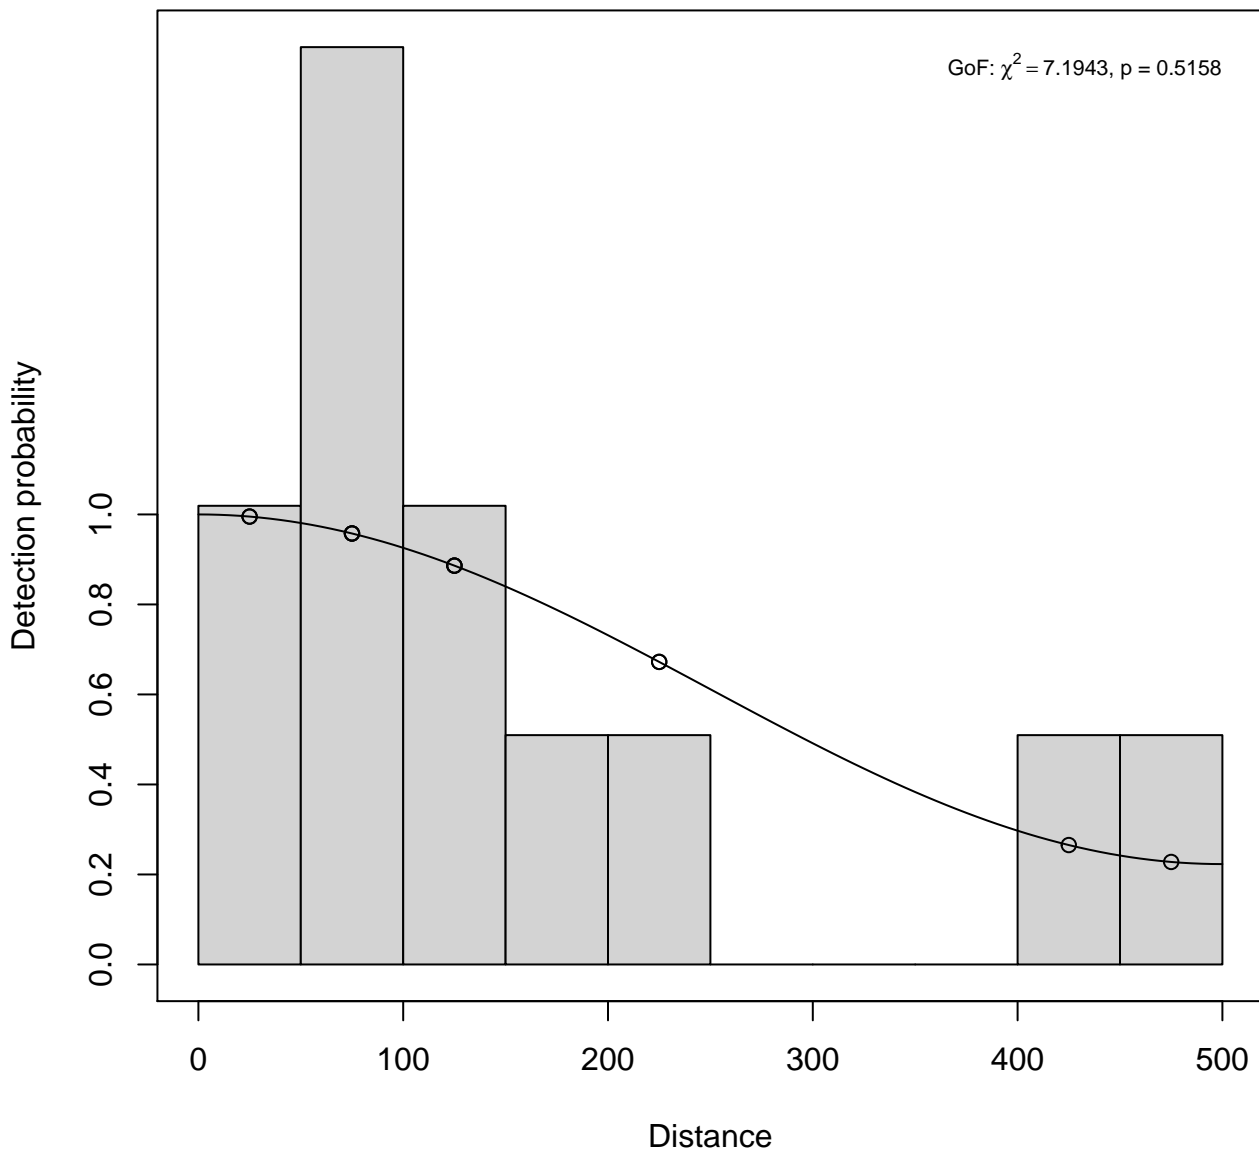

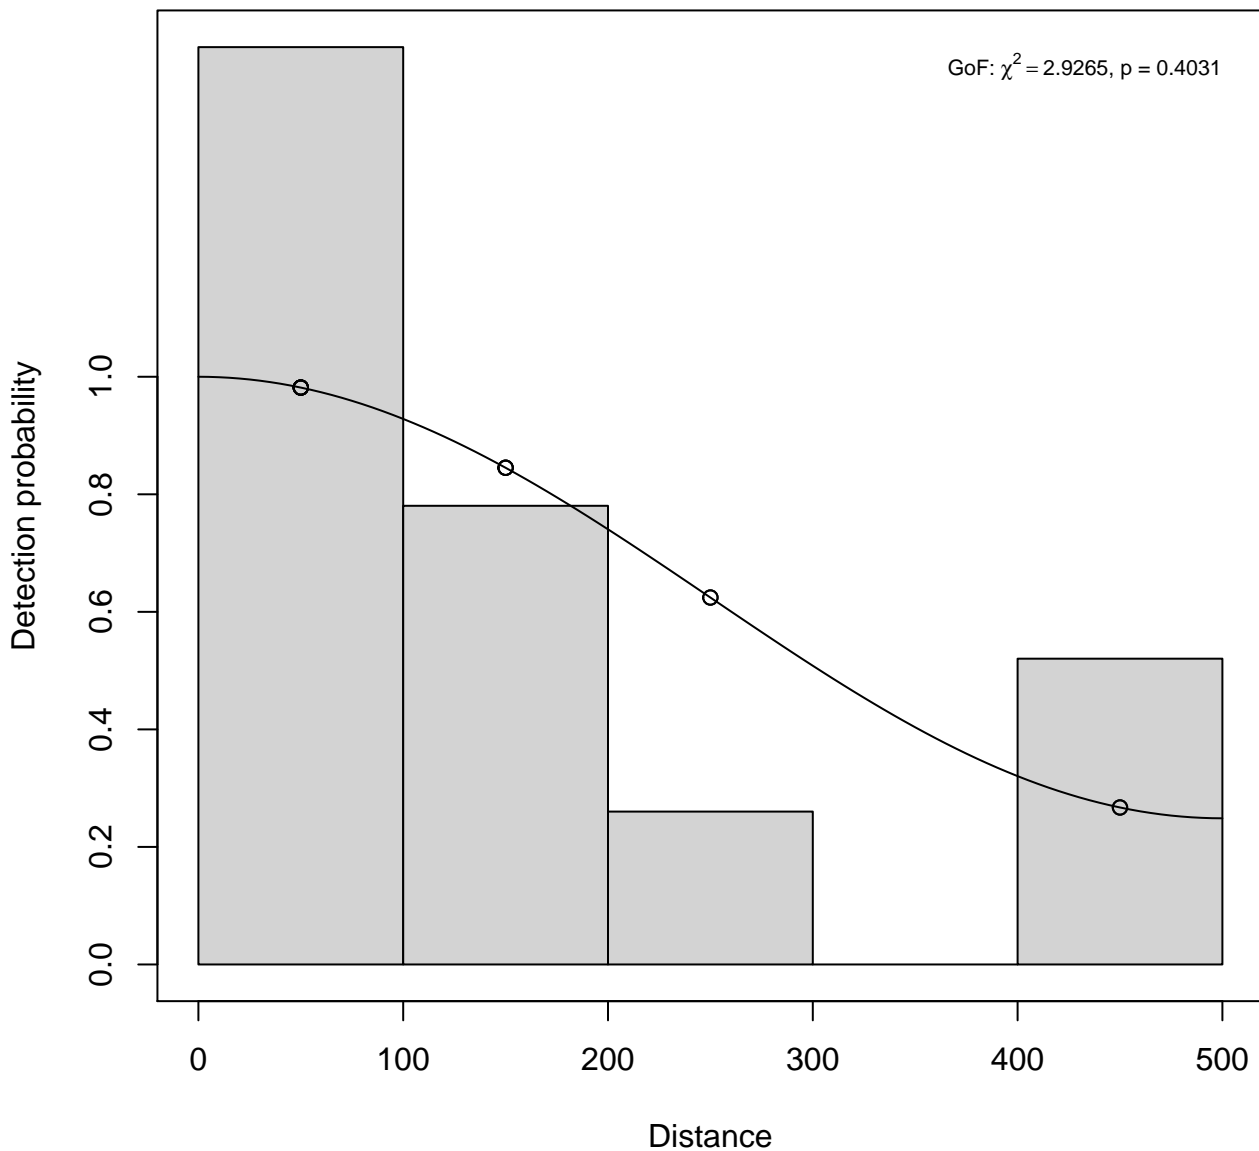

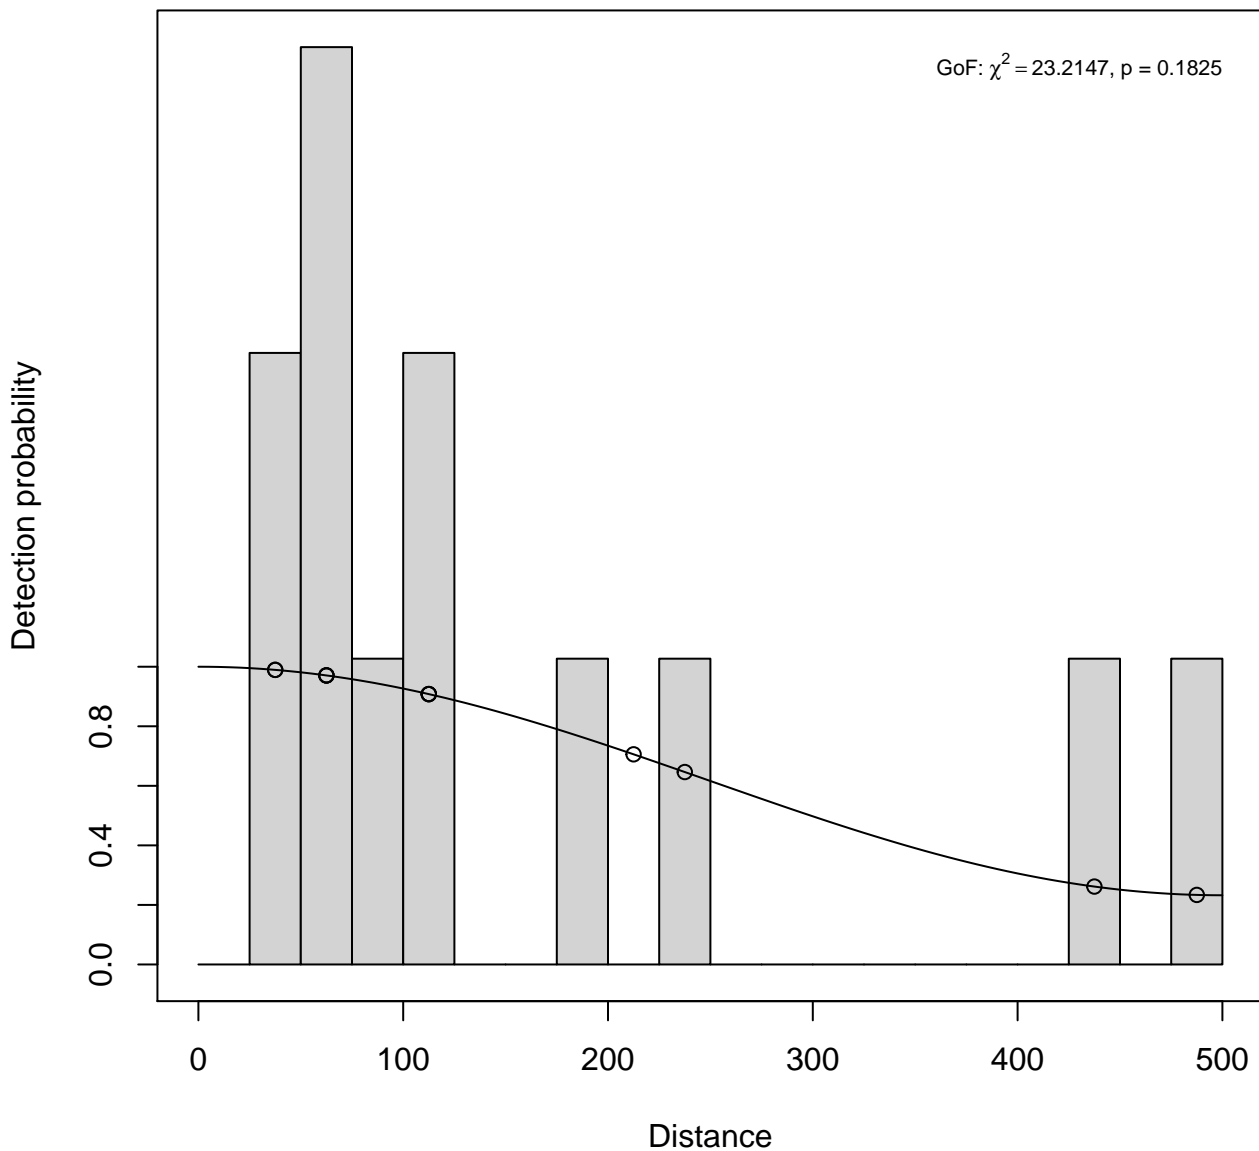

Supplement: s1 [file s1]
