# Supplementary material
Source: MDPI journal article supplement (https://www.mdpi.com/1424-2818/13/7/300)

# **Psittacara mitratus – Central Andean puna – Argentina**

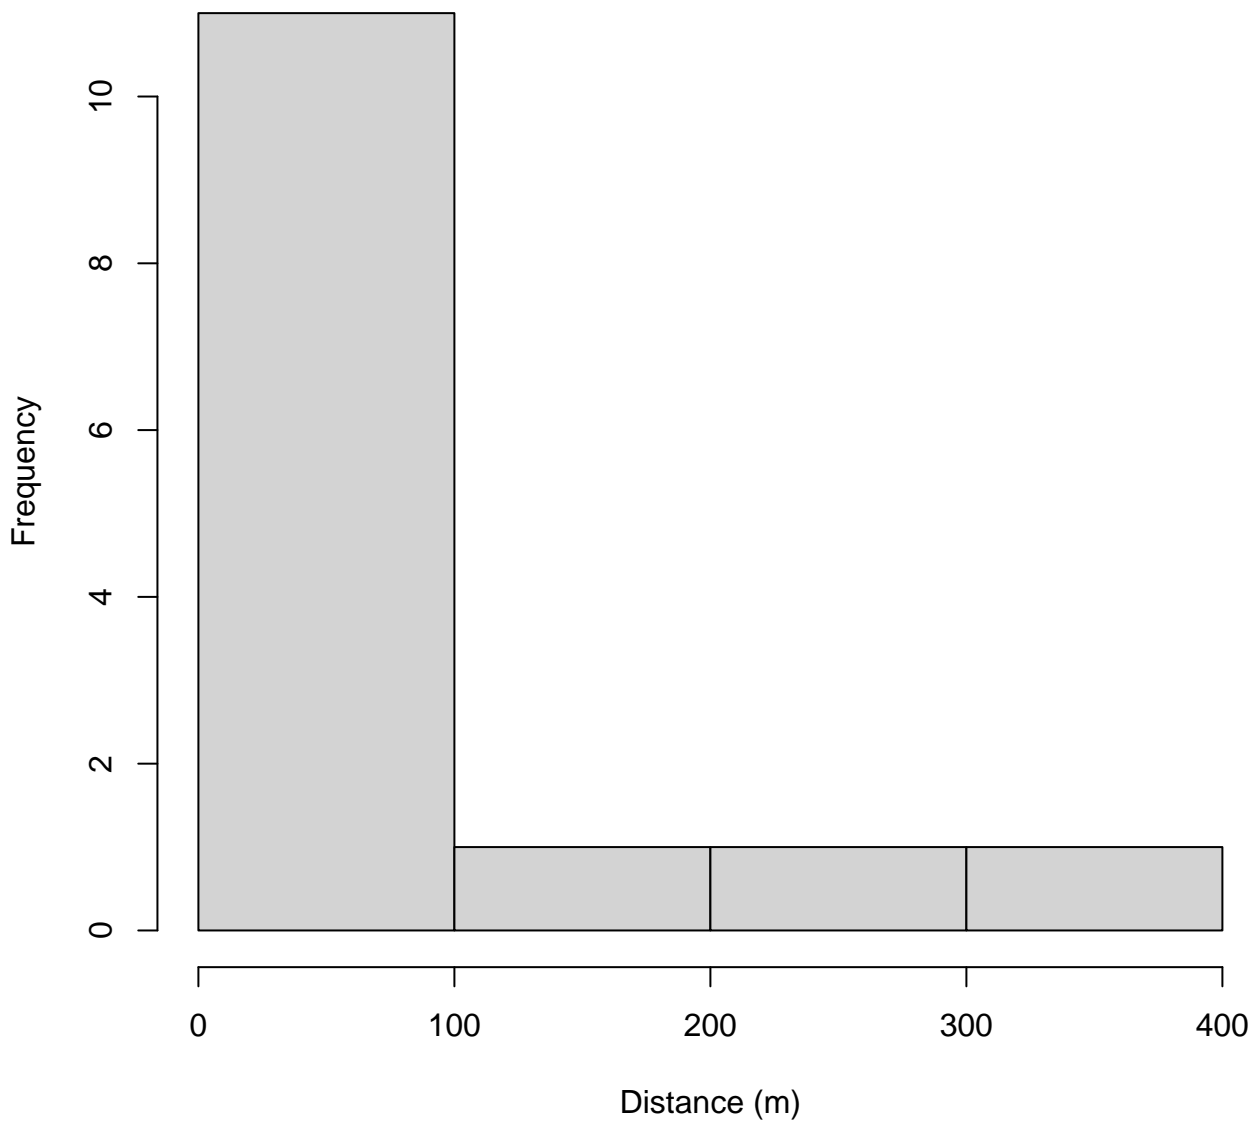

# Psittacara mitratus – Central Andean puna – Argentina

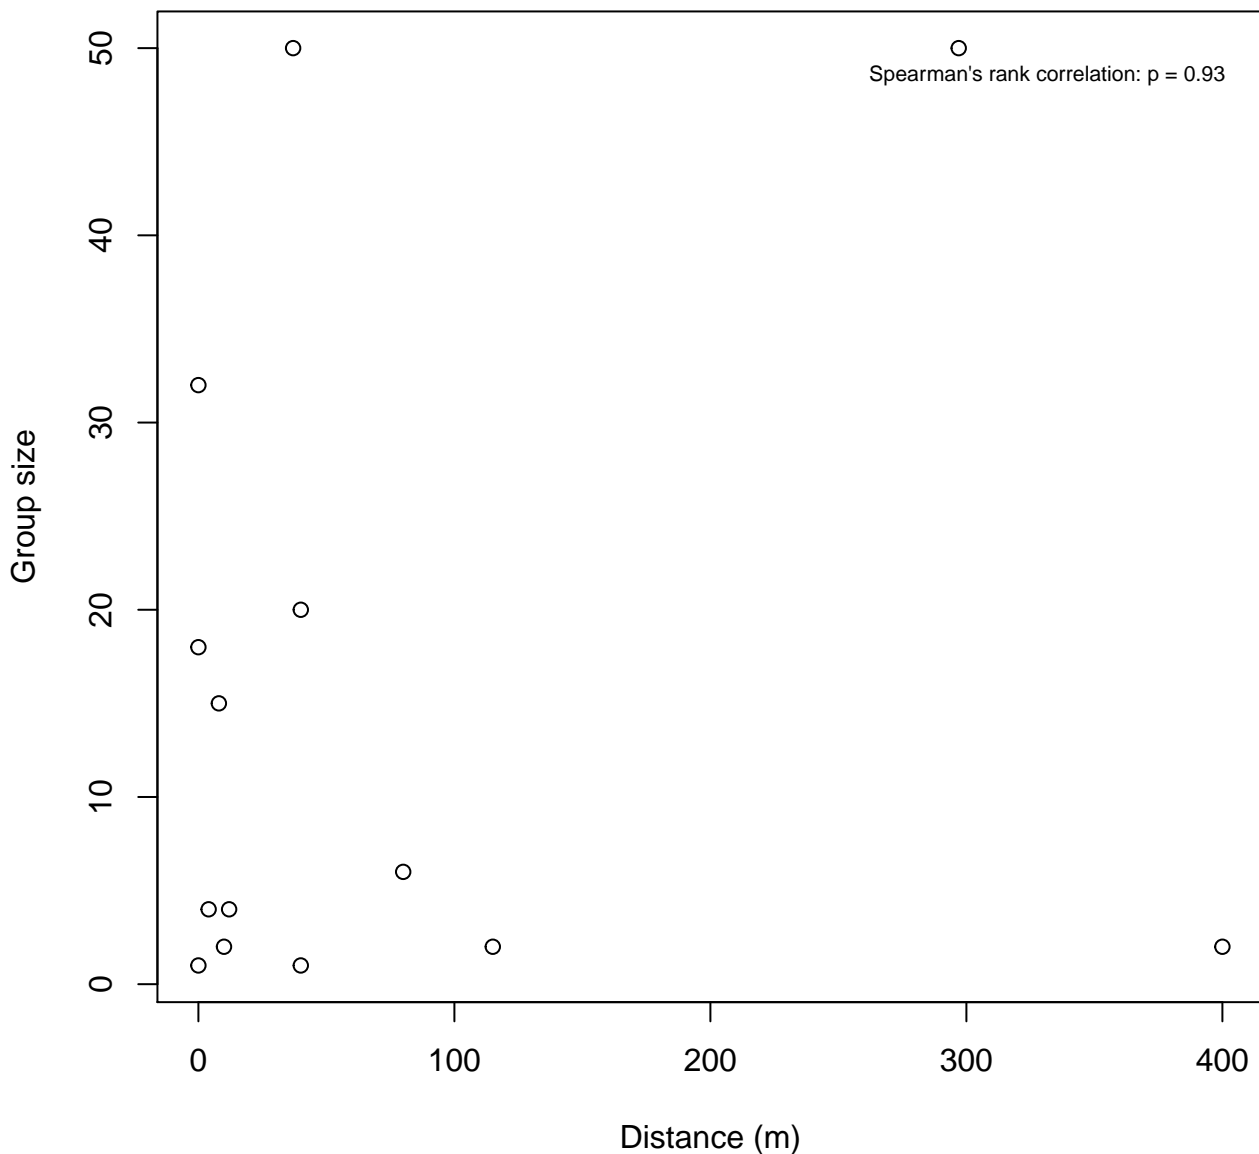

Psittacara mitratus – Central Andean puna – Argentina (N = 14, key function = hr)

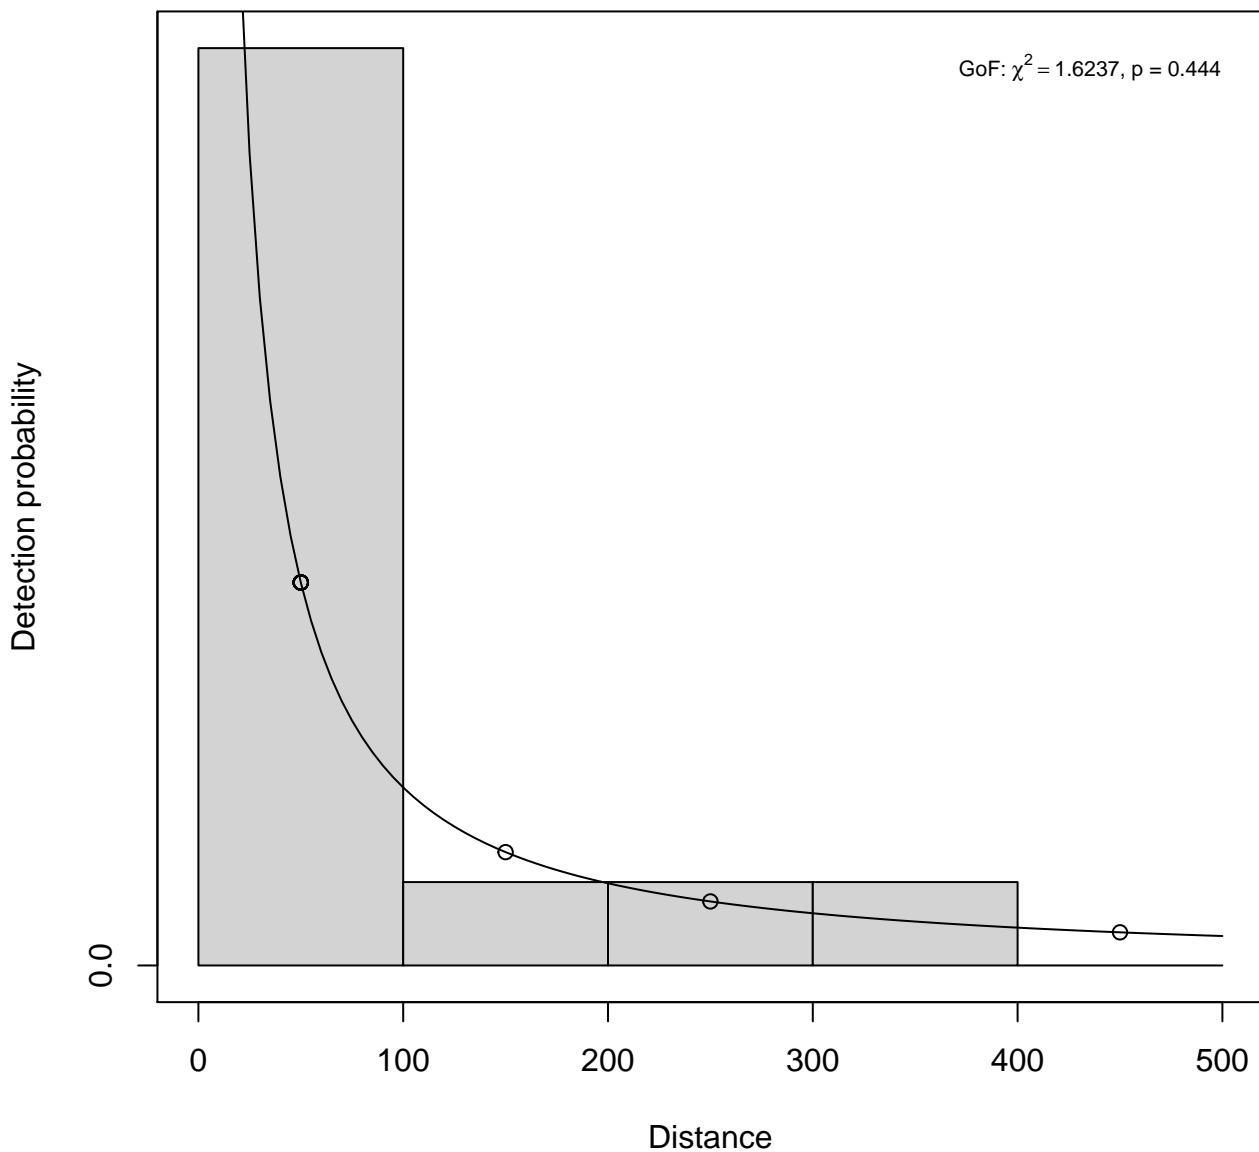

*Psittacara mitratus* – Central Andean puna – Argentina (N = 14, key function = hr)

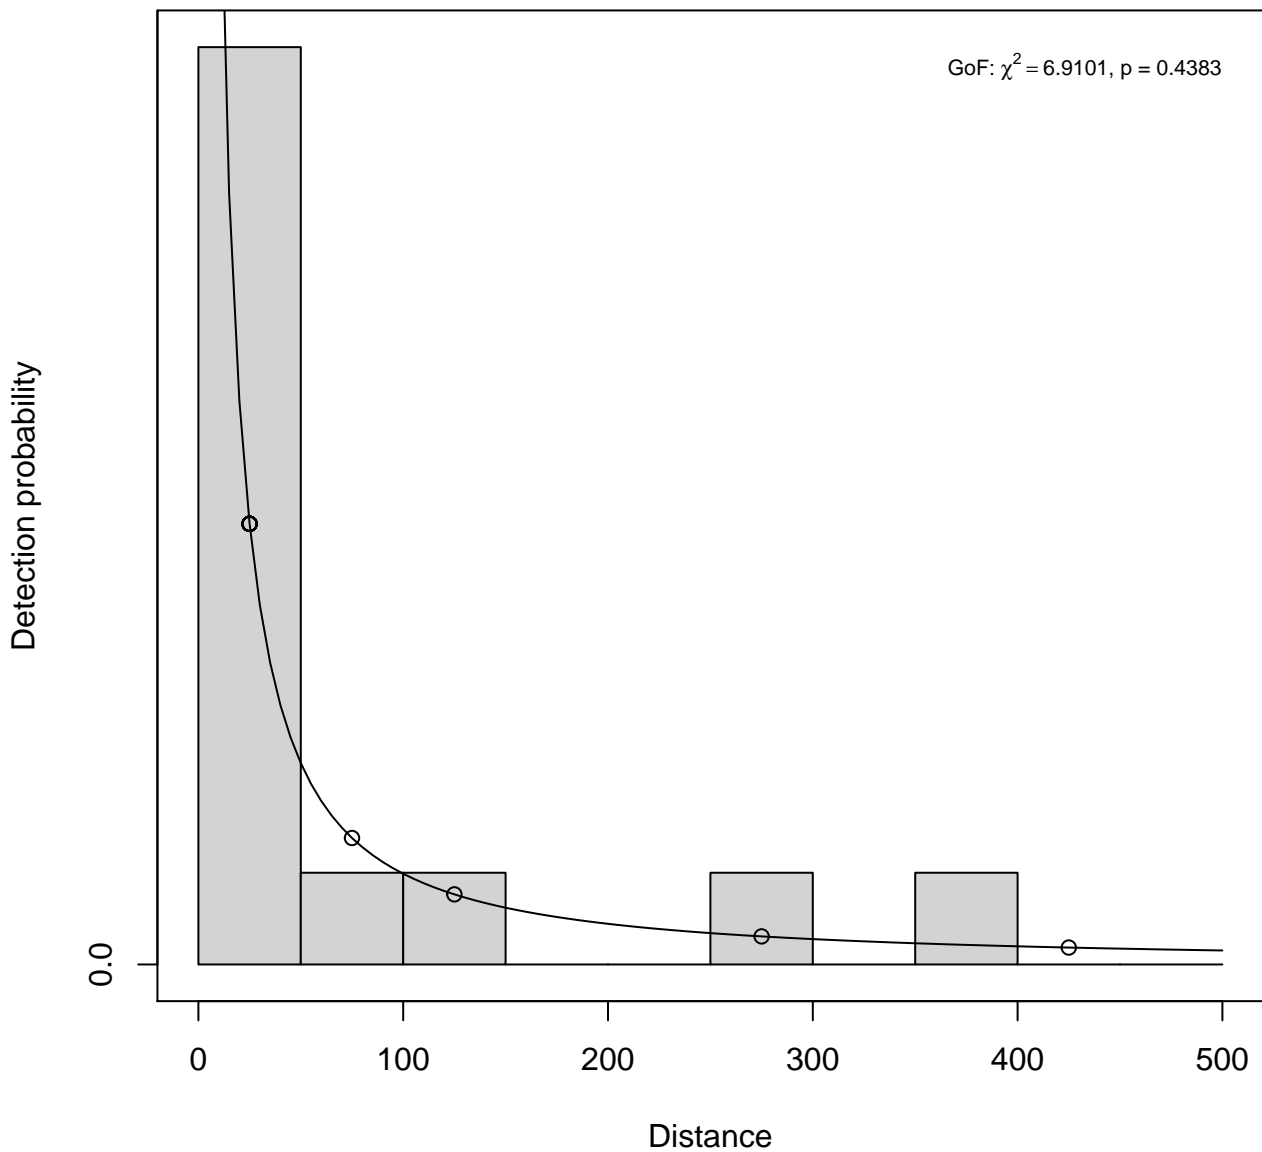

Psittacara mitratus – Central Andean puna – Argentina (N = 14, key function = hr)

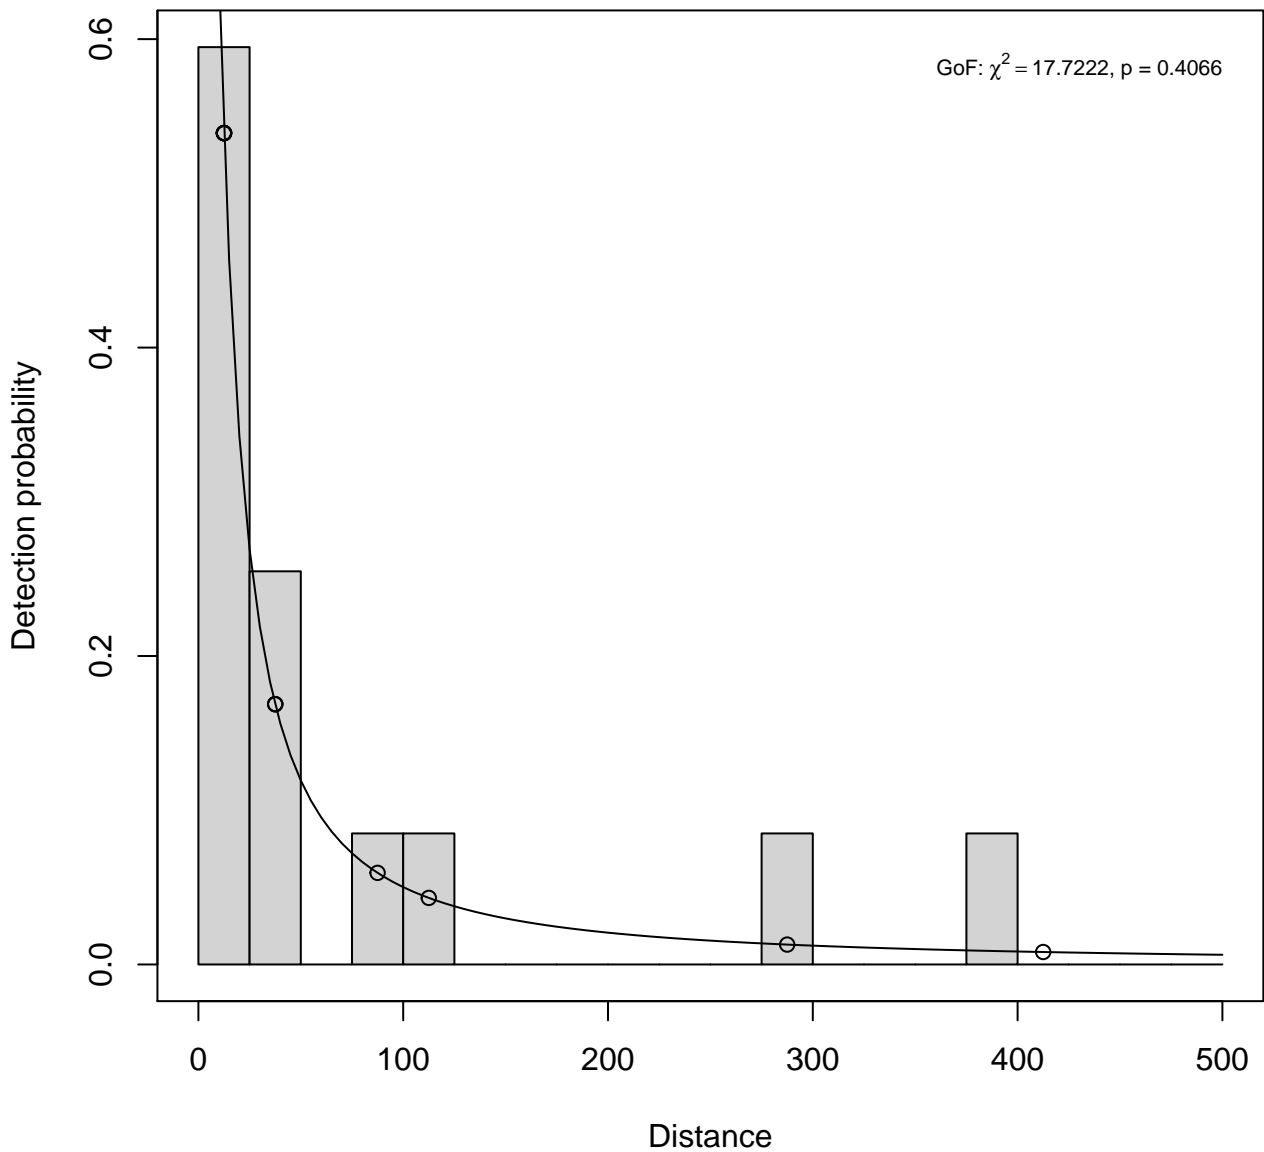

Supplement: s1 [file s1]
