# Supplementary material
Source: MDPI journal article supplement (https://www.mdpi.com/1424-2818/13/7/300)

# **Brotogetis pyrrhoptera – Tumbes–Piura dry forests – Peru**

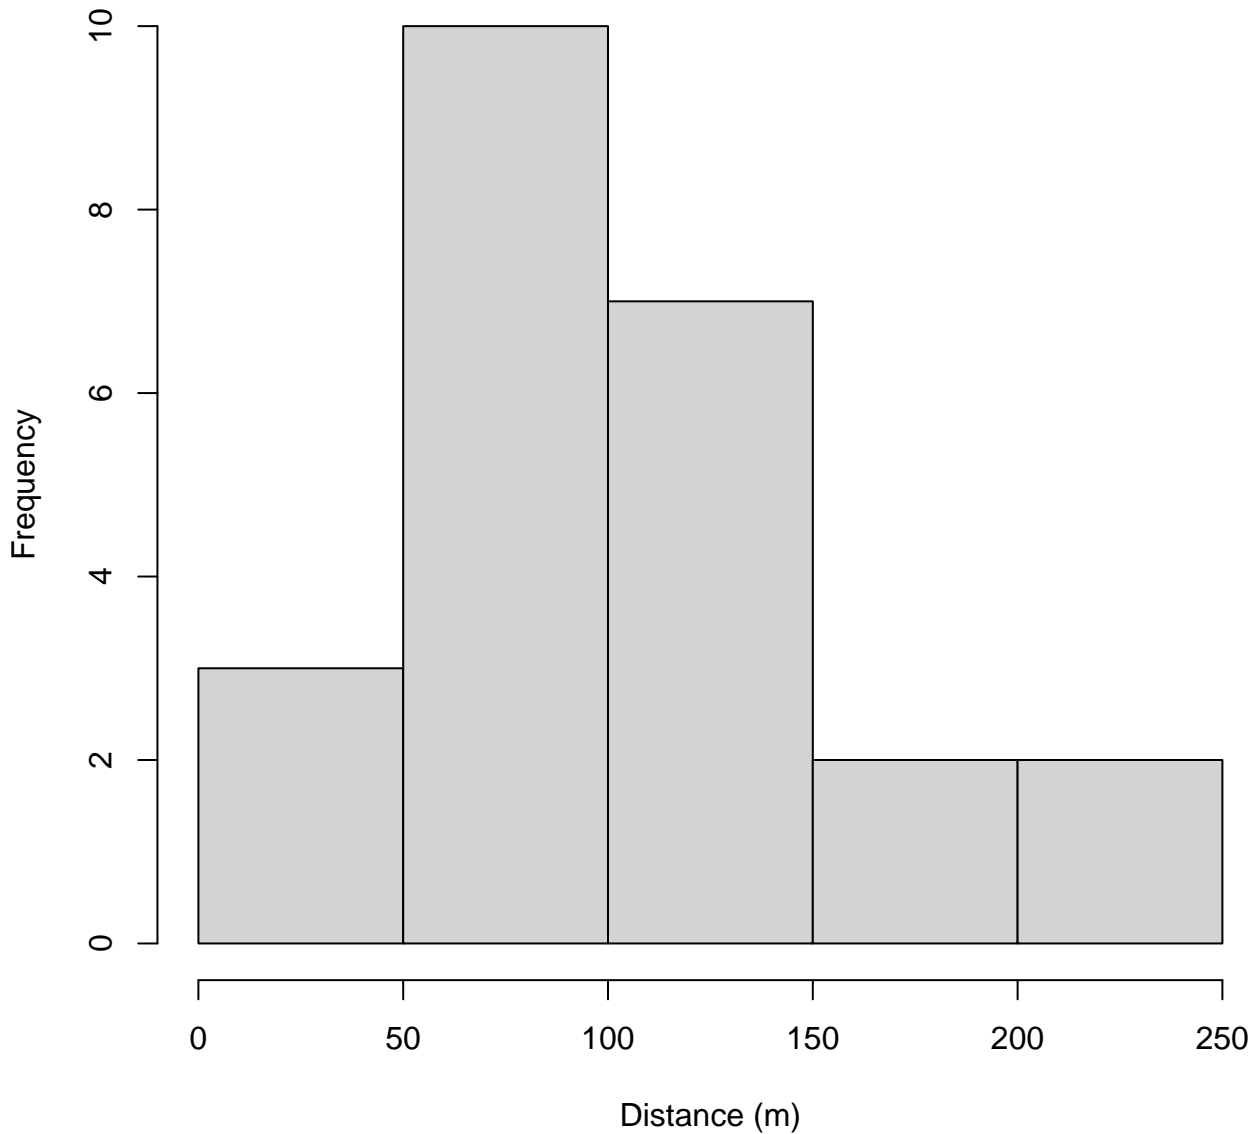

# **Brotogetis pyrrhoptera – Tumbes–Piura dry forests – Peru**

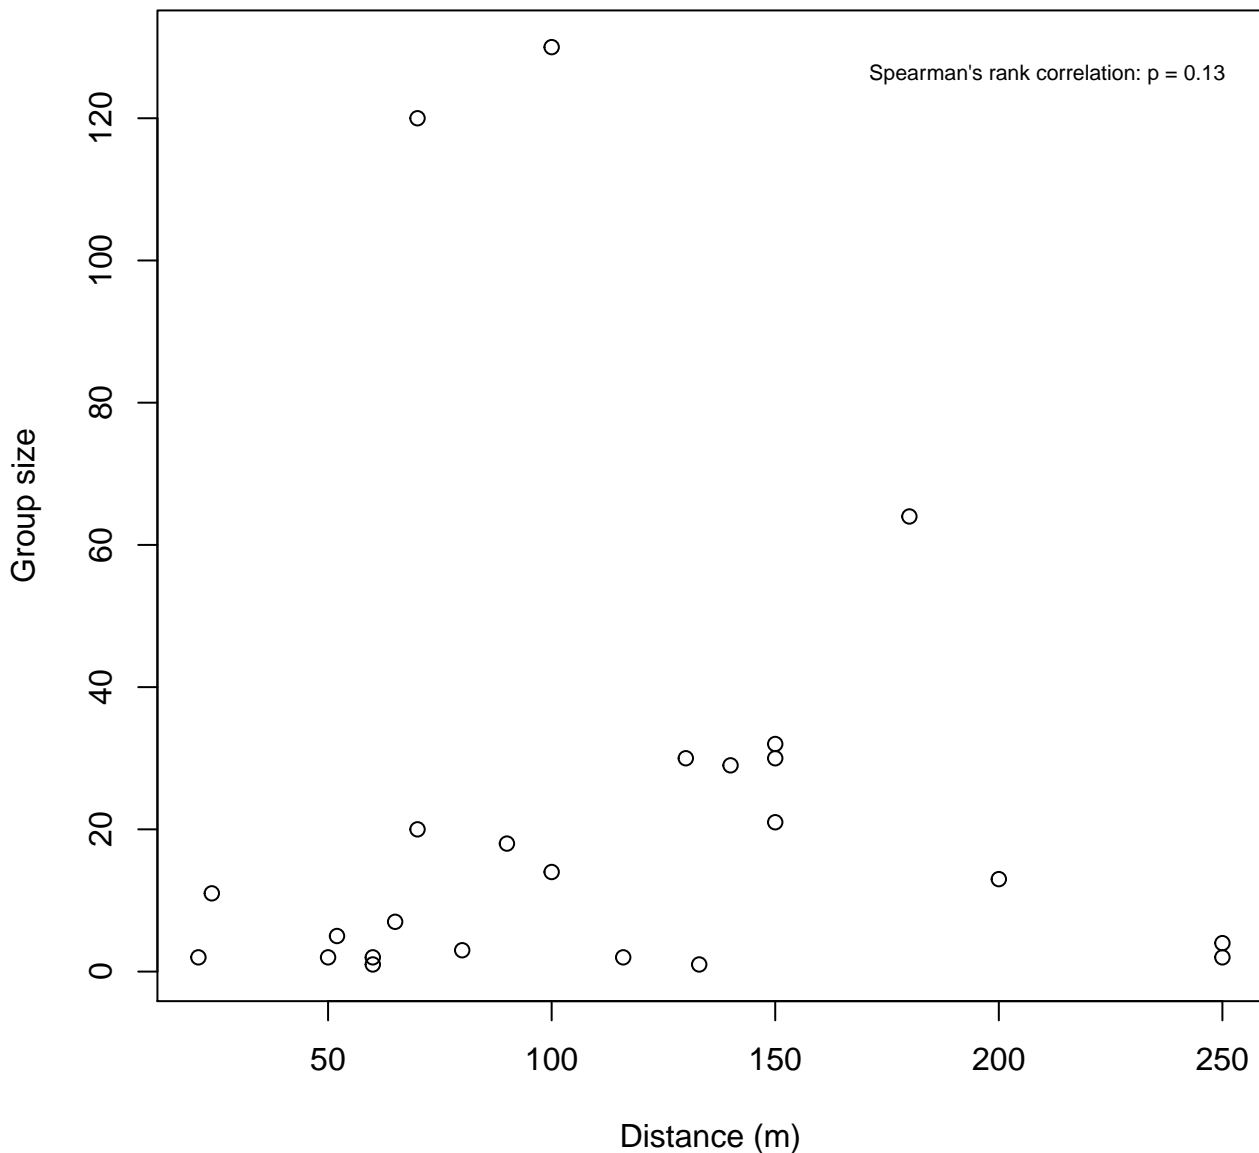

*Brotogeris pyrrhoptera* – Tumbes–Piura dry forests – Peru (N = 24, key function = hr)

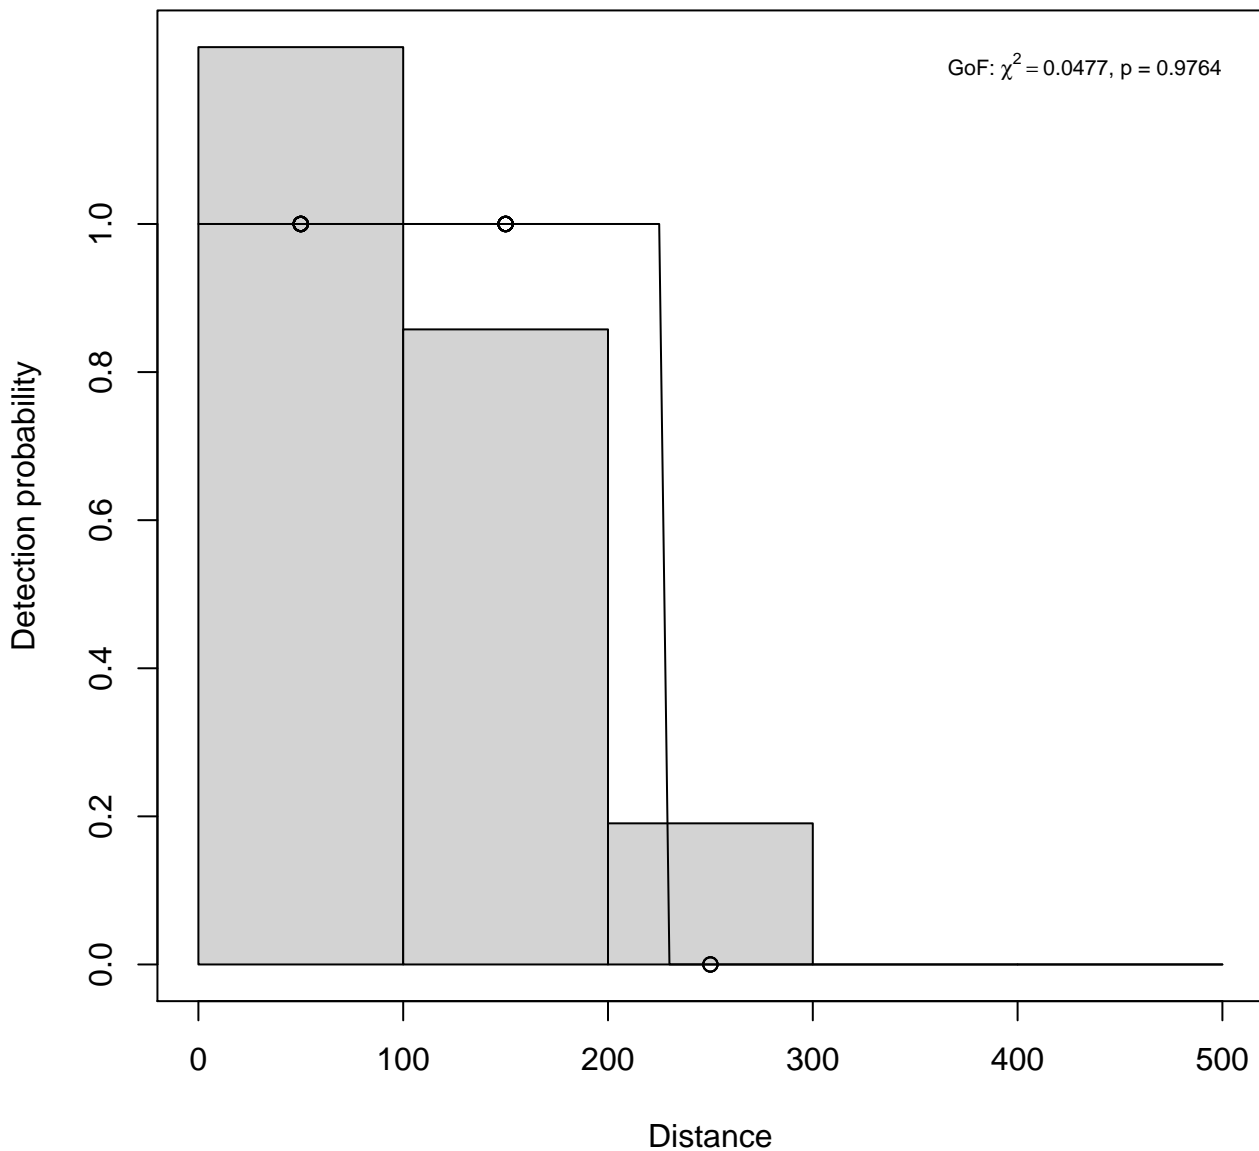

Brotogeris pyrrhoptera – Tumbes–Piura dry forests – Peru (N = 24, key function = hn)

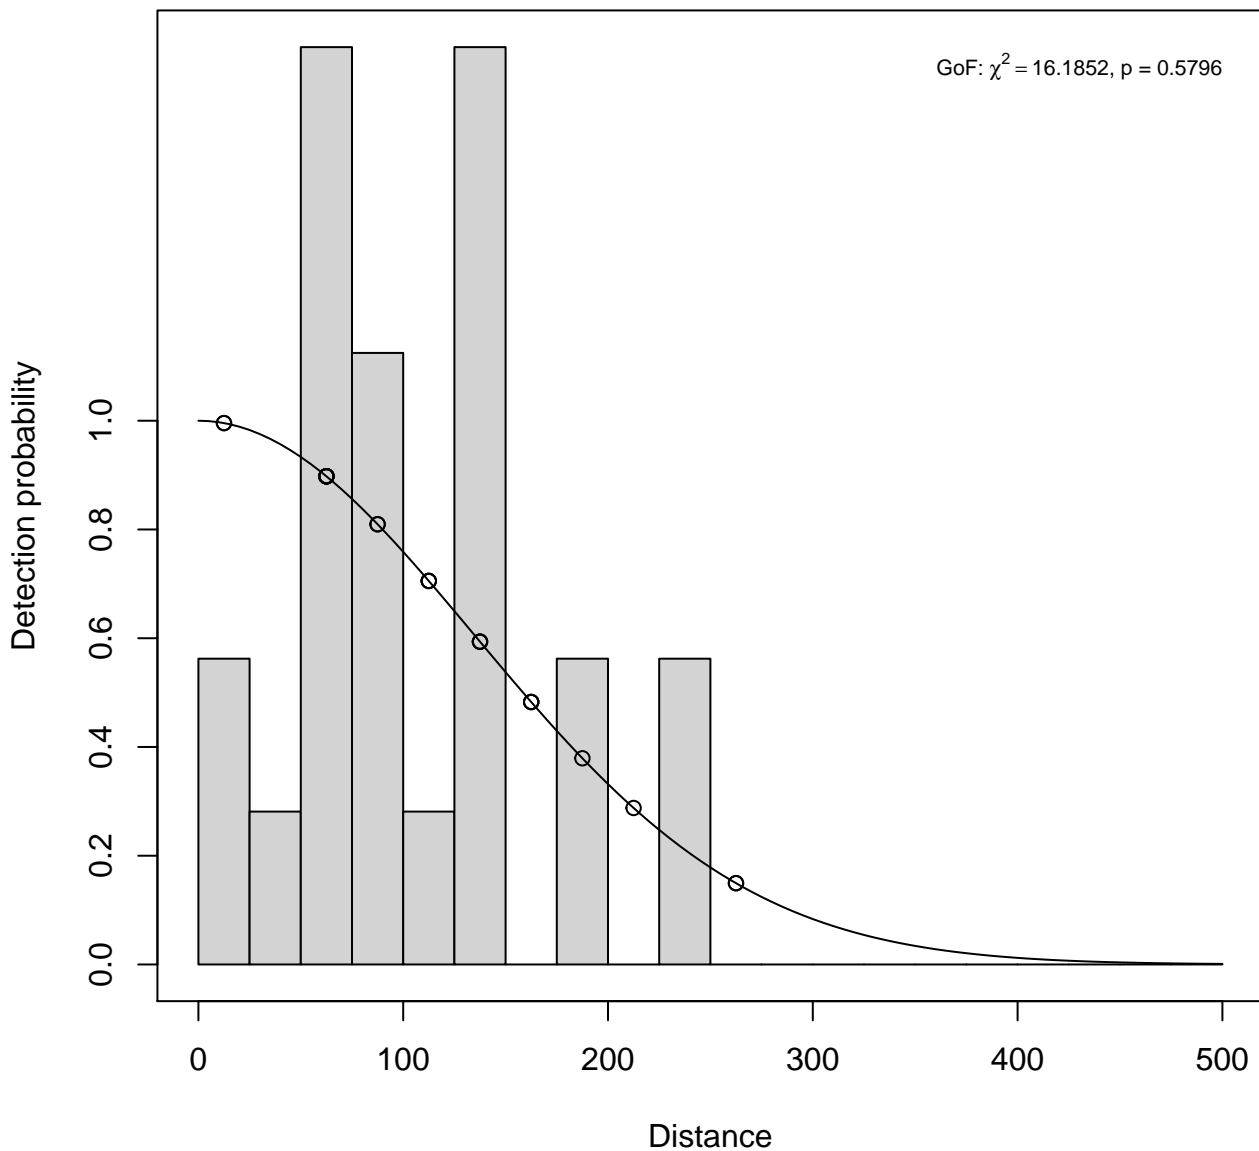

*Brotogeris pyrrhoptera* – Tumbes–Piura dry forests – Peru (N = 24, key function = hn)

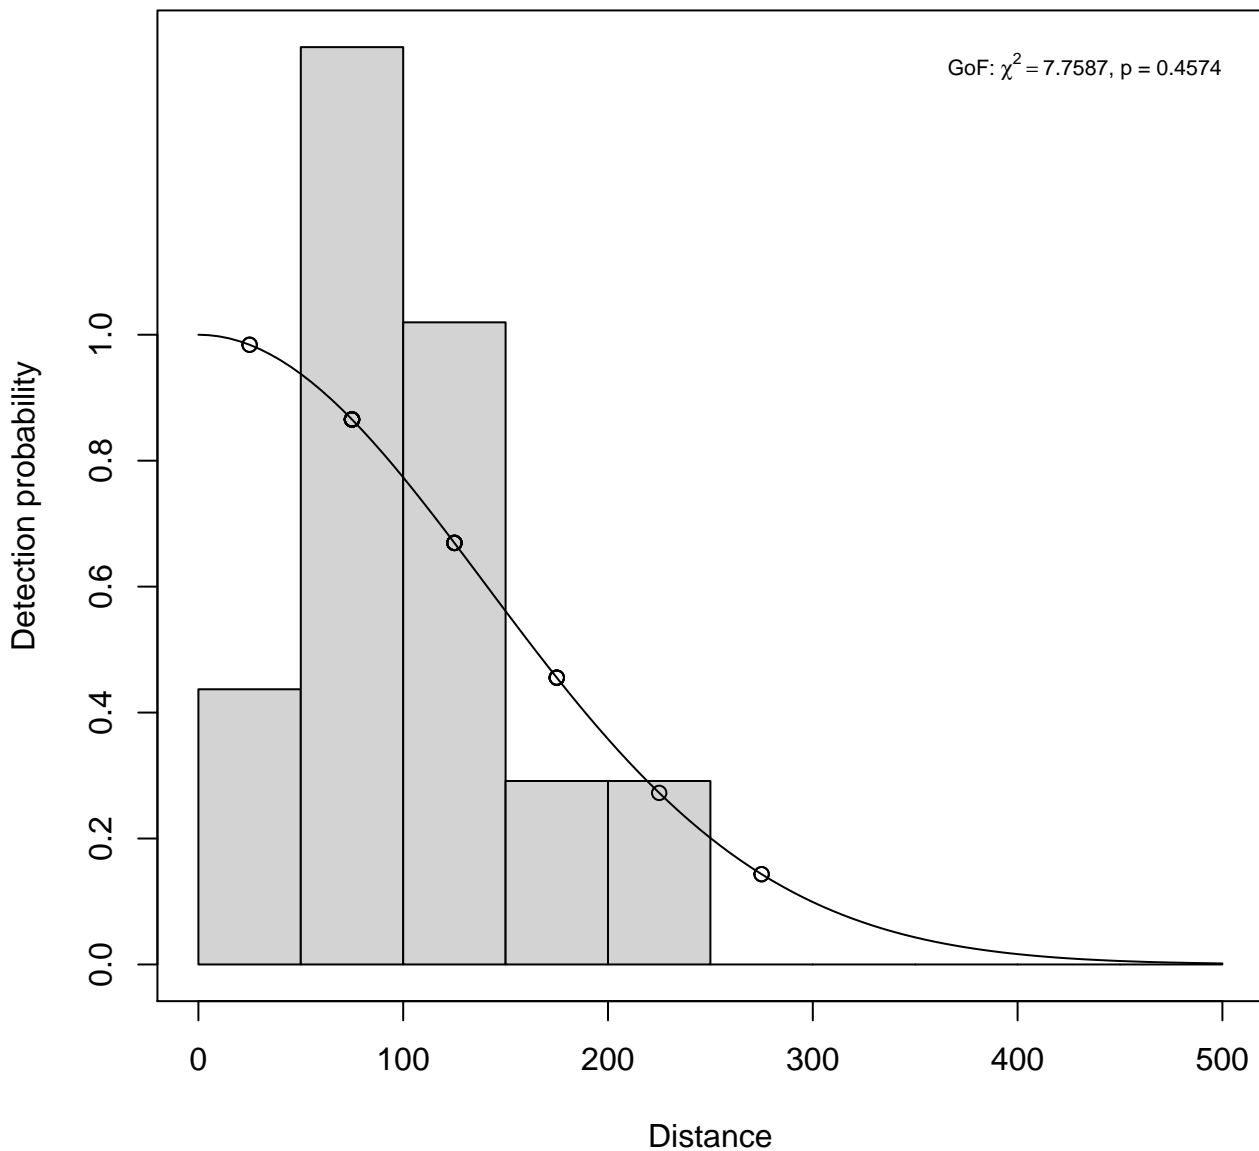

Supplement: s1 [file s1]
