# Supplementary material
Source: MDPI journal article supplement (https://www.mdpi.com/1424-2818/13/7/300)

# **Pionus menstruus – Guajira–Barranquilla xeric scrub – Colombia**

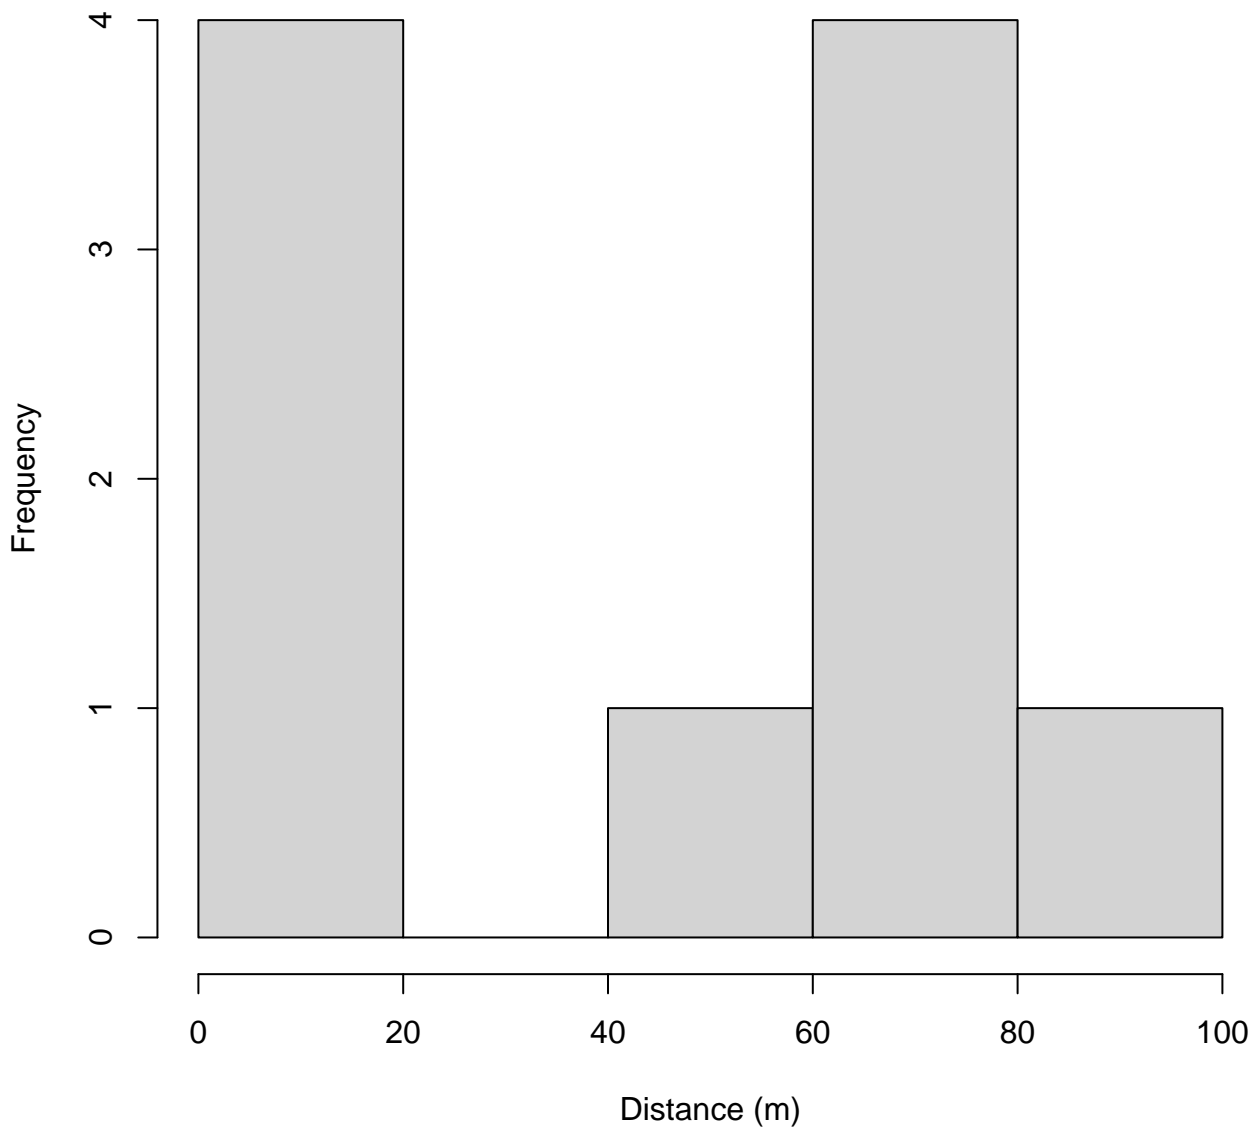

# Pionus menstruus – Guajira–Barranquilla xeric scrub – Colombia

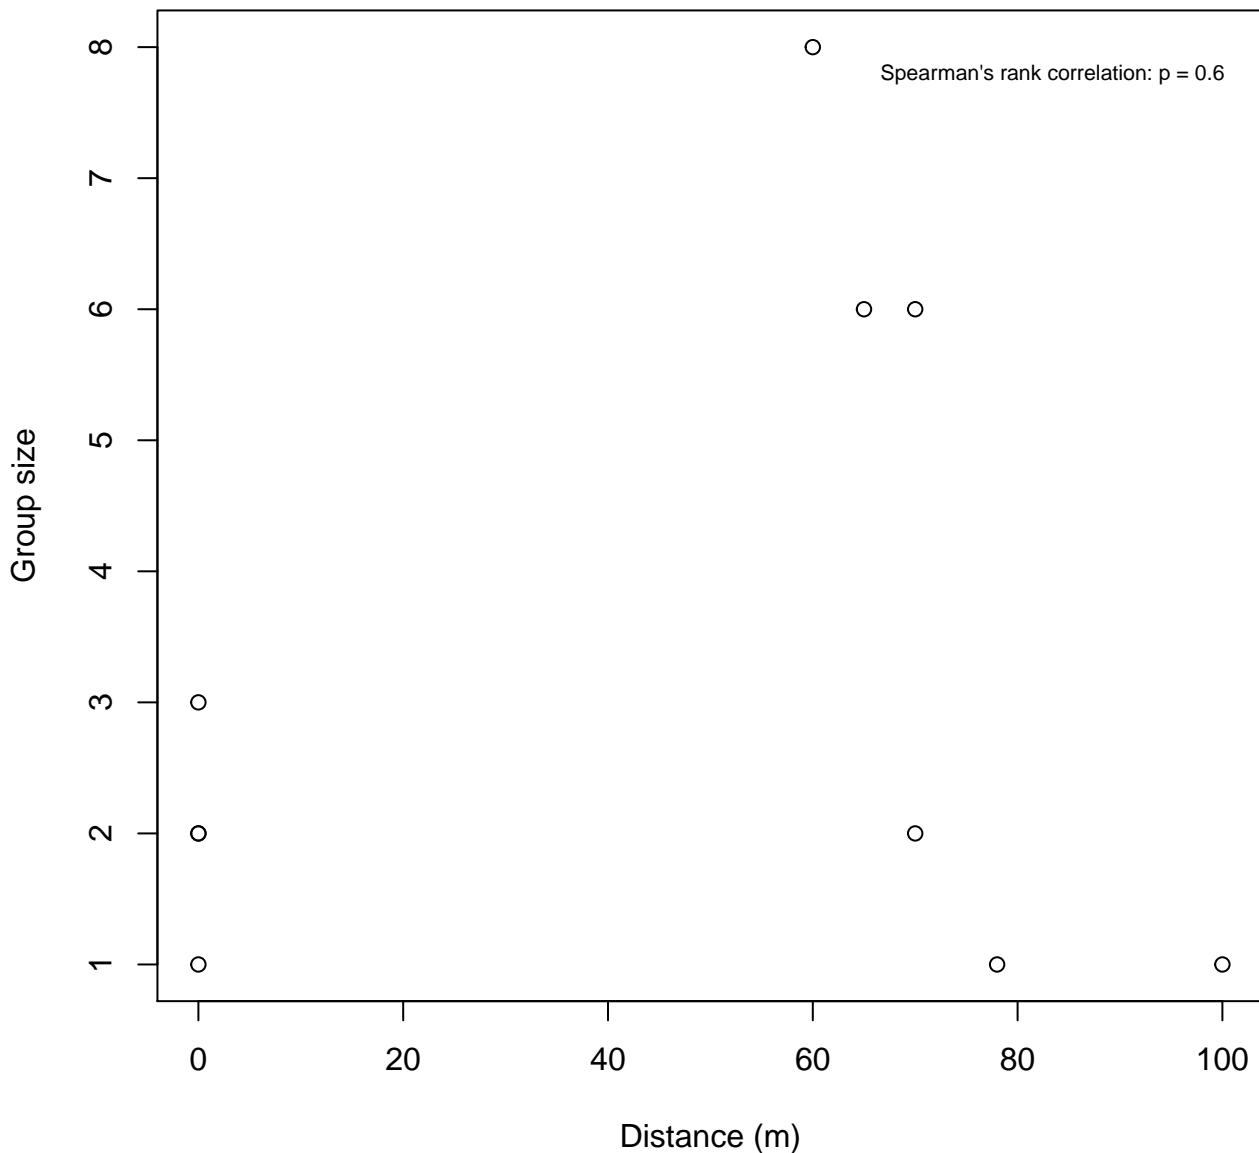

Pionus menstruus – Guajira–Barranquilla xeric scrub – Colombia (N = 10, key function = hn)

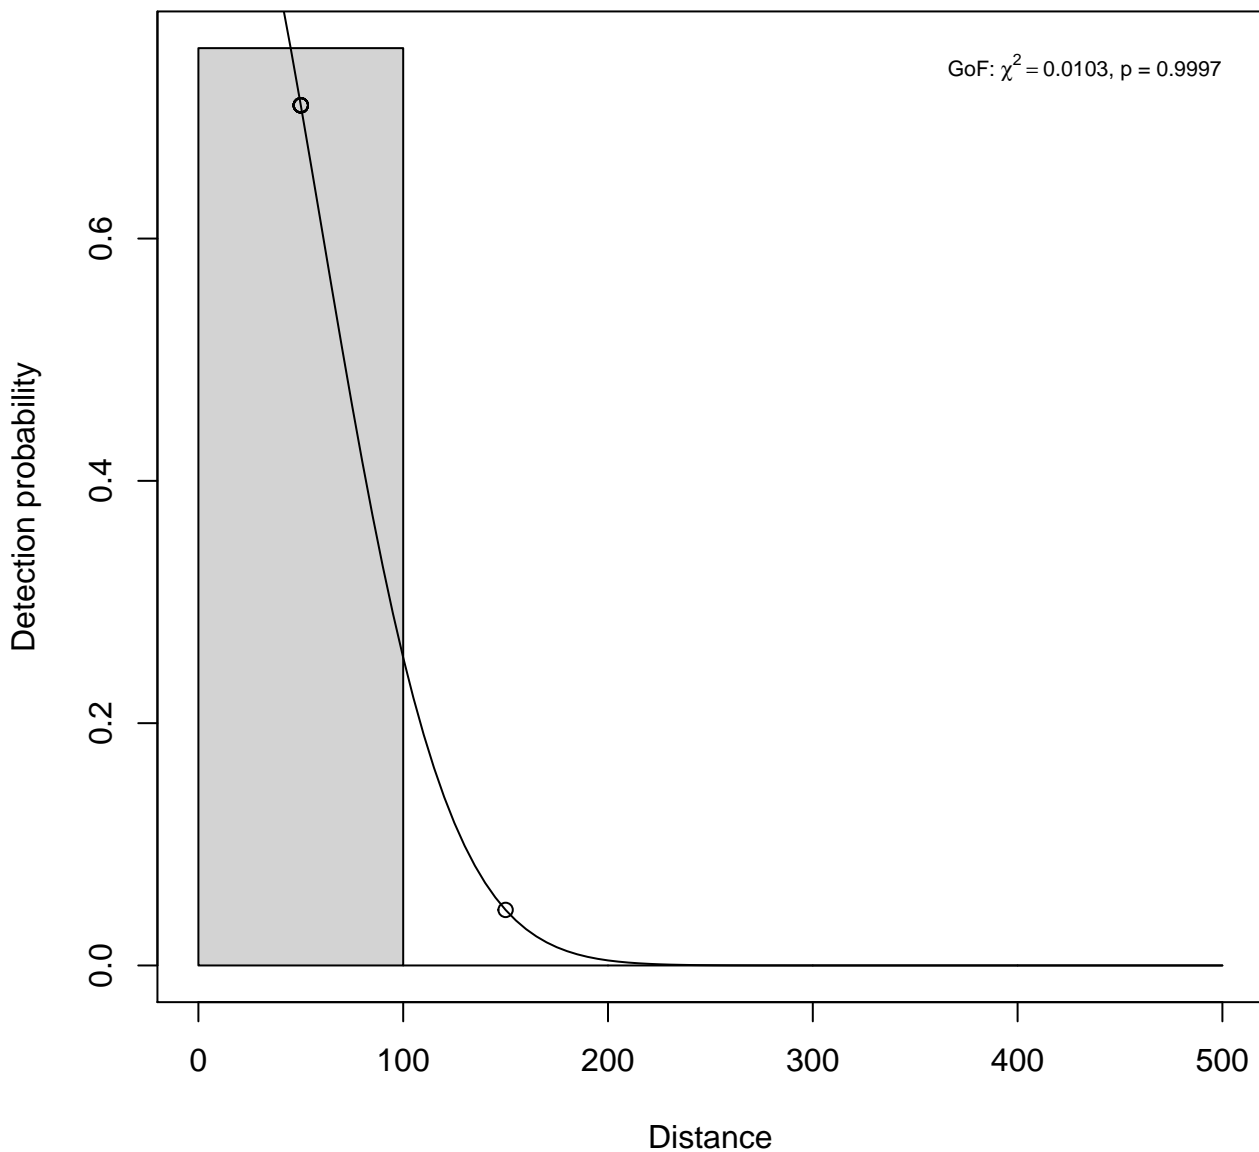

*Pionus menstruus* – Guajira–Barranquilla xeric scrub – Colombia (N = 10, key function = hn)

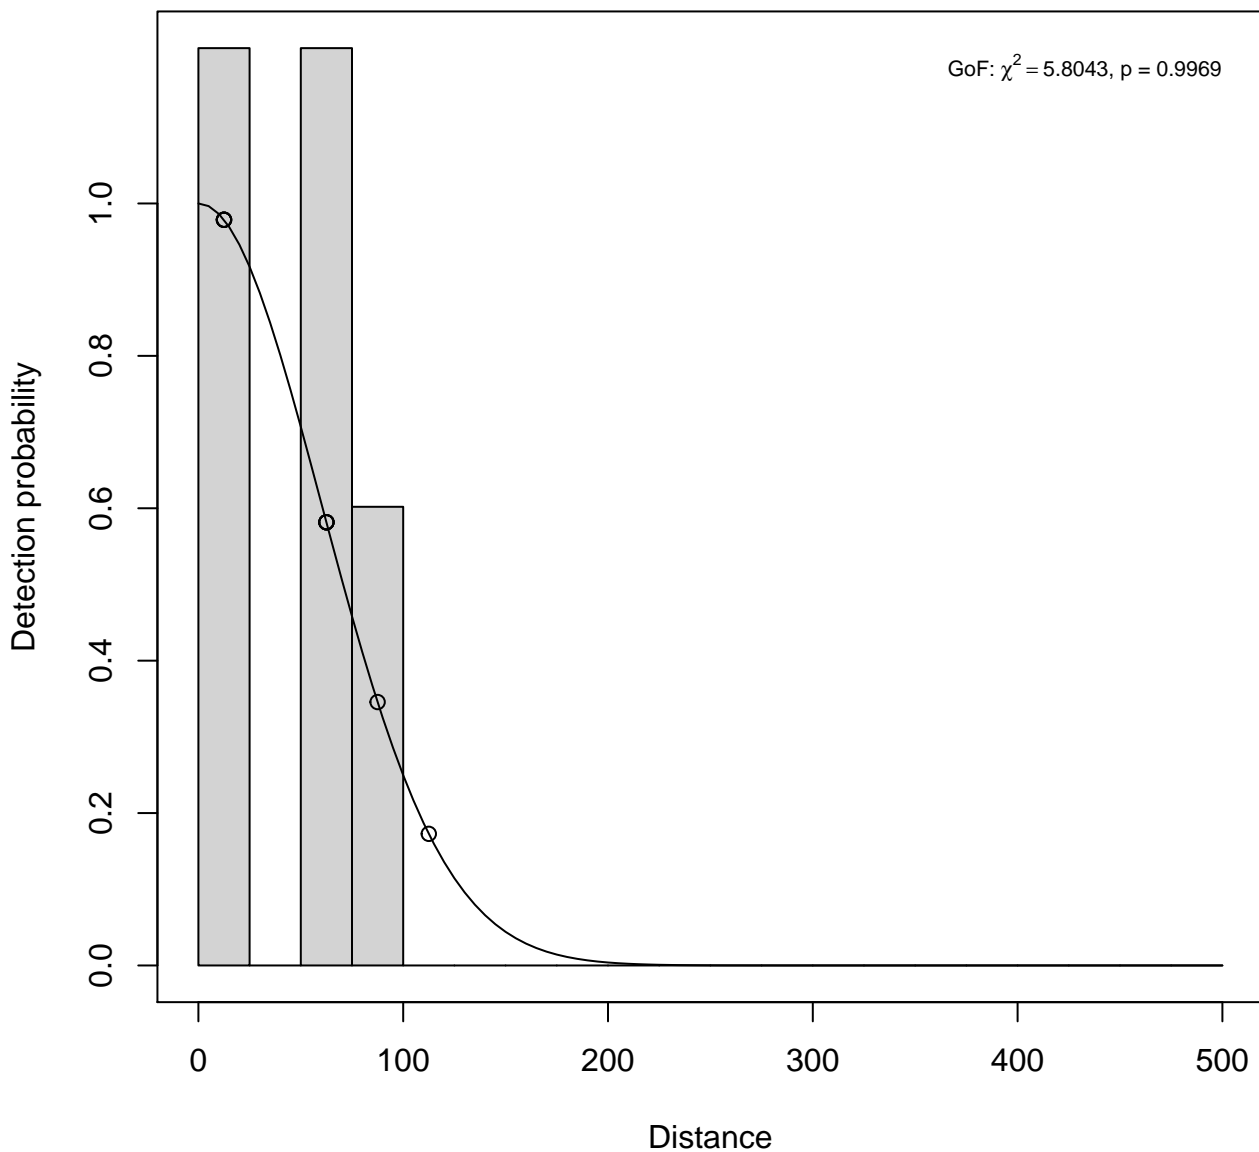

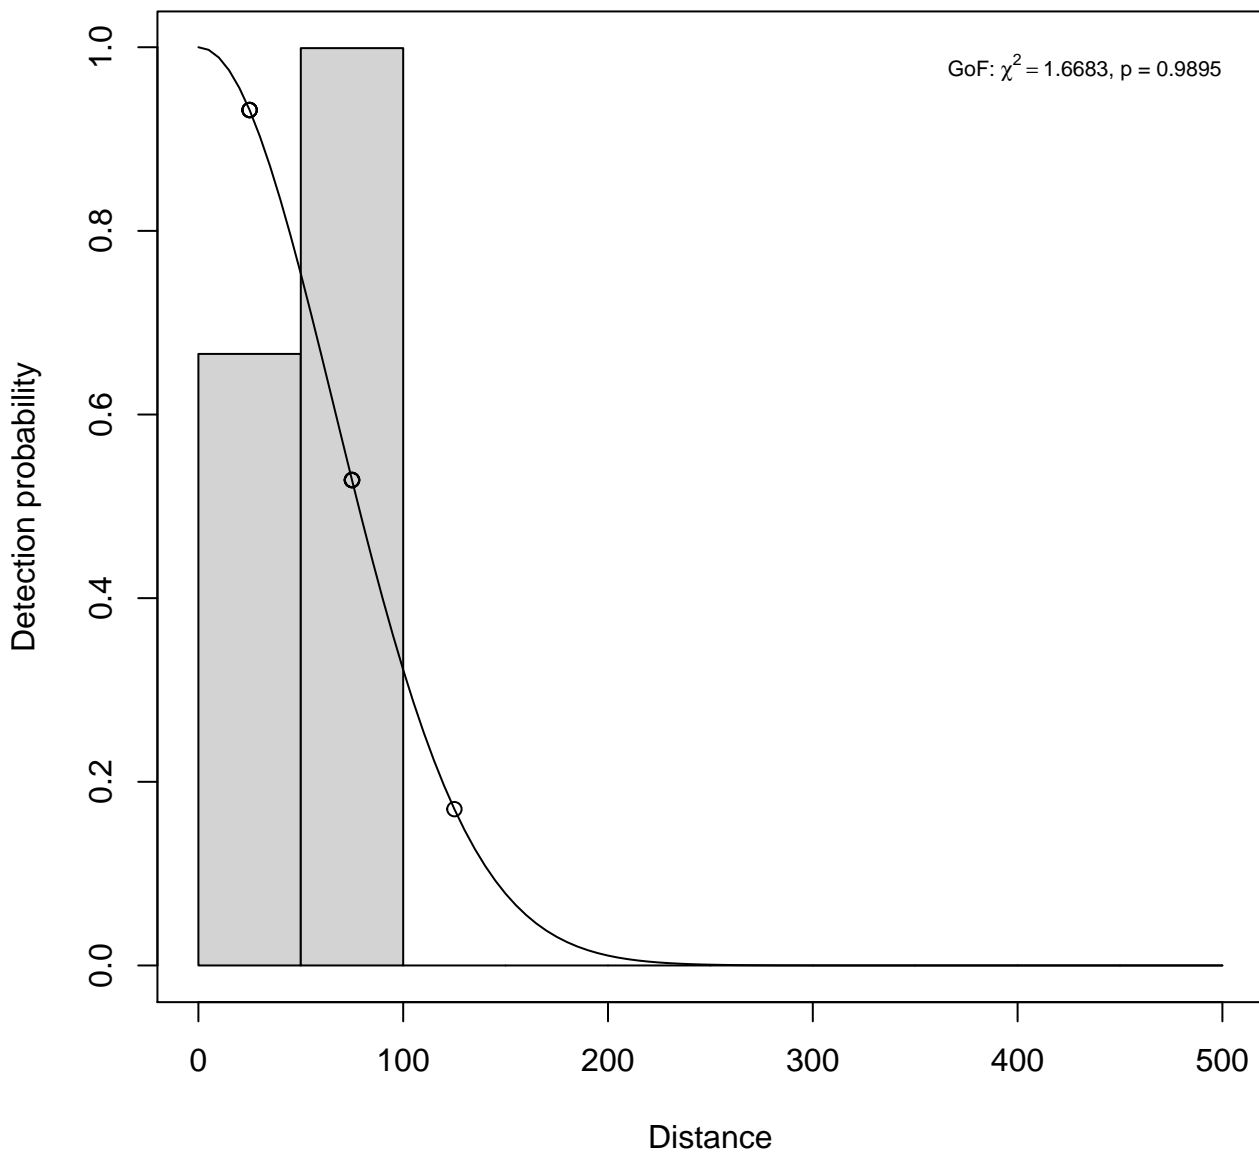

Supplement: s1 [file s1]
