# Supplementary material
Source: MDPI journal article supplement (https://www.mdpi.com/1424-2818/13/7/300)

# Pionus menstruus – Peruvian Yungas – Peru

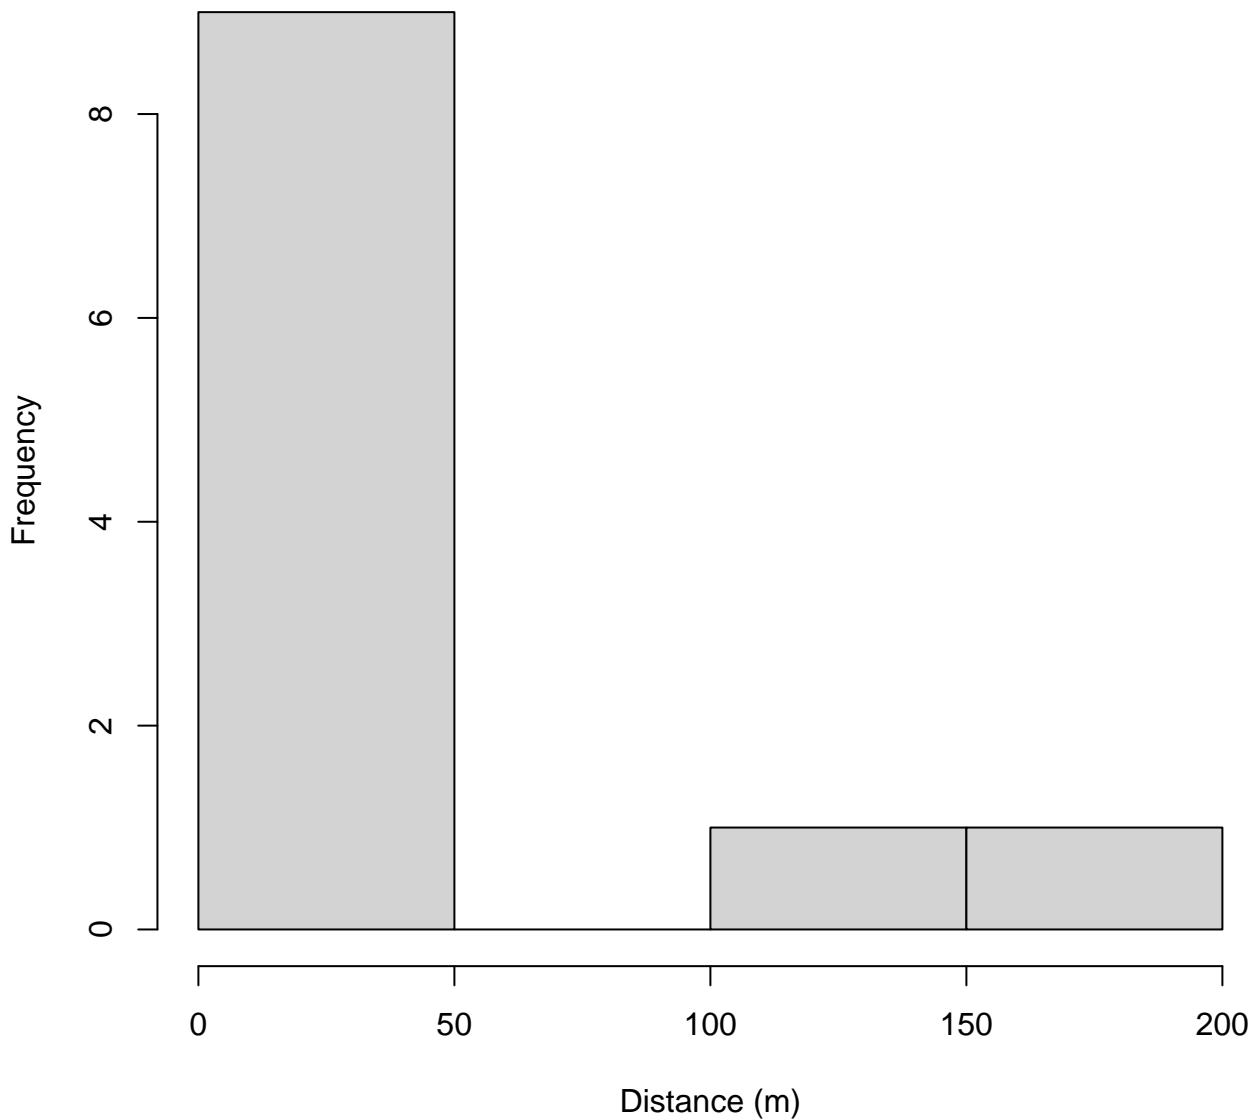

# Pionus menstruus – Peruvian Yungas – Peru

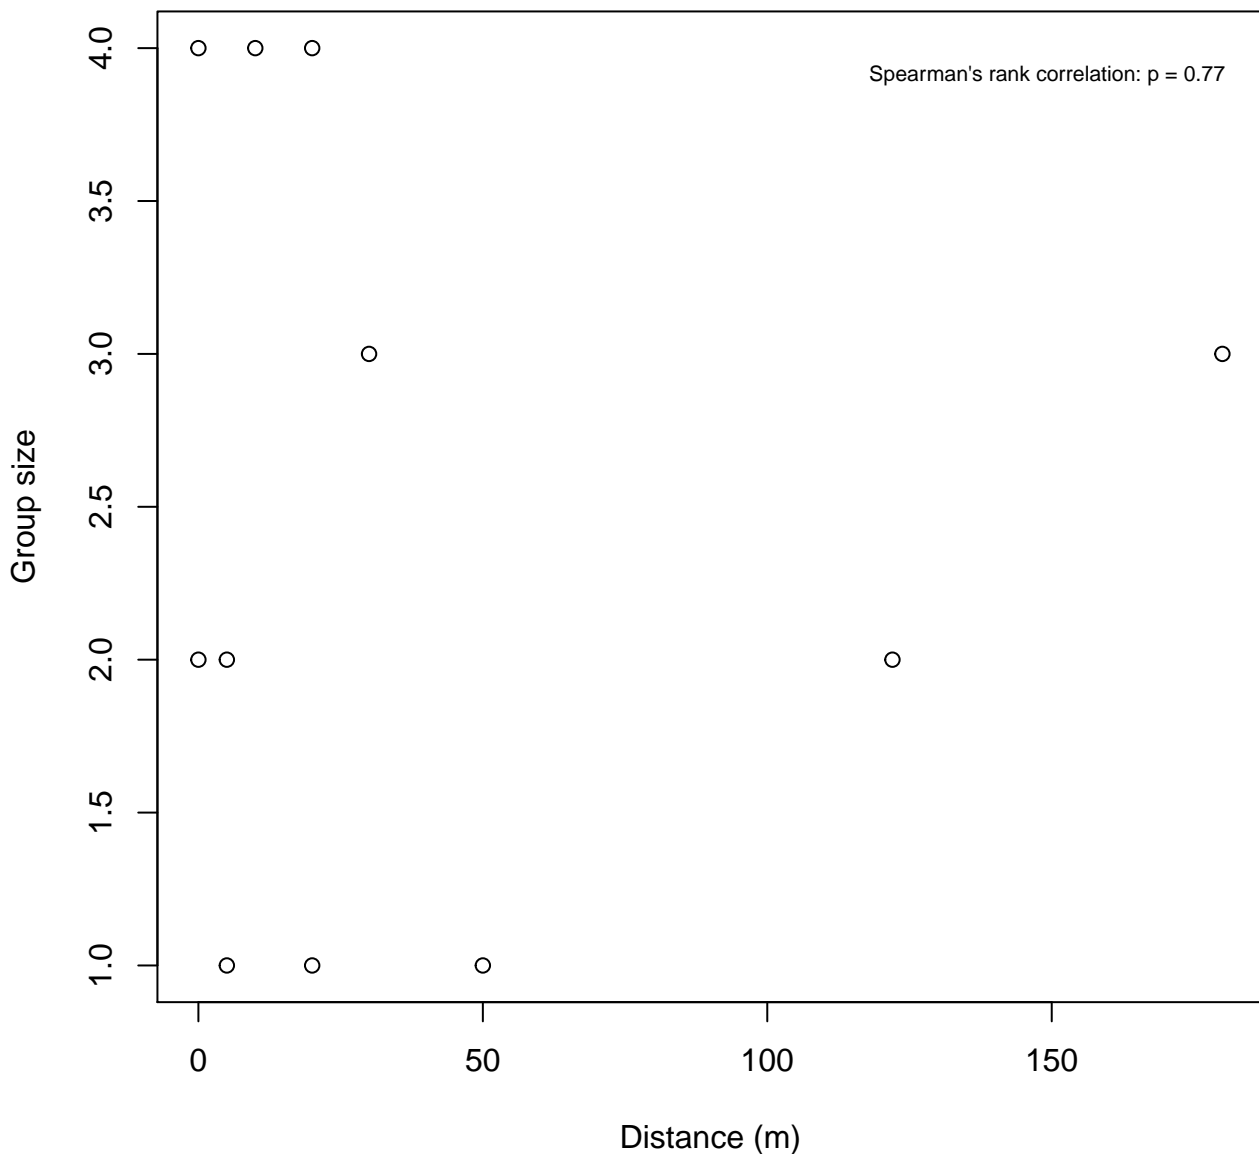

Pionus menstruus – Peruvian Yungas – Peru (N = 11, key function = hn)

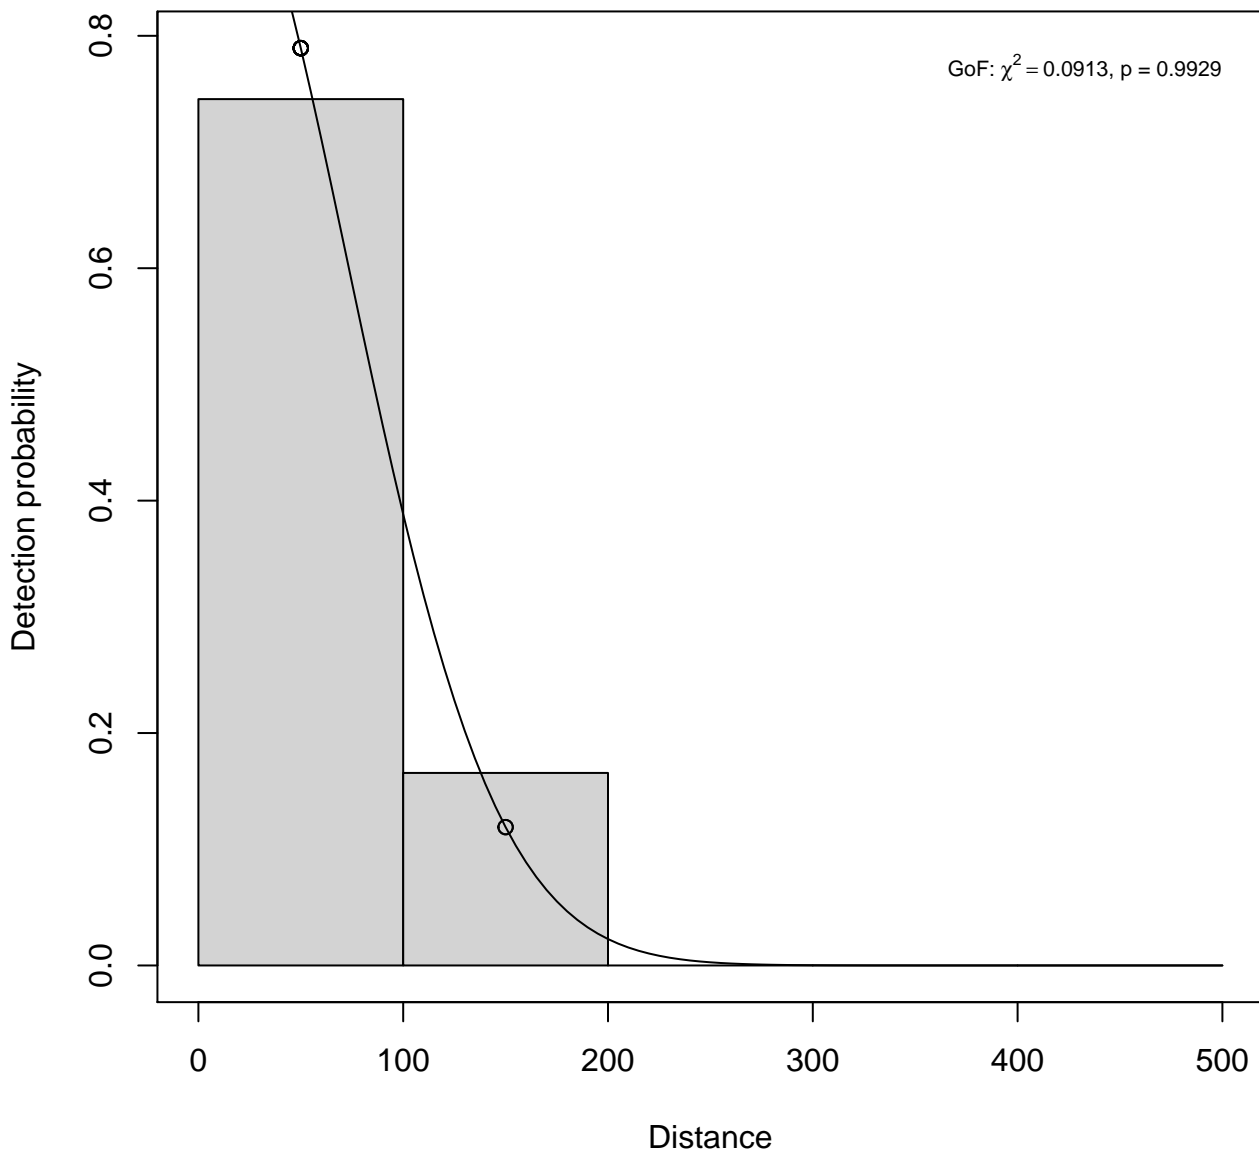

Pionus menstruus – Peruvian Yungas – Peru (N = 11, key function = hr)

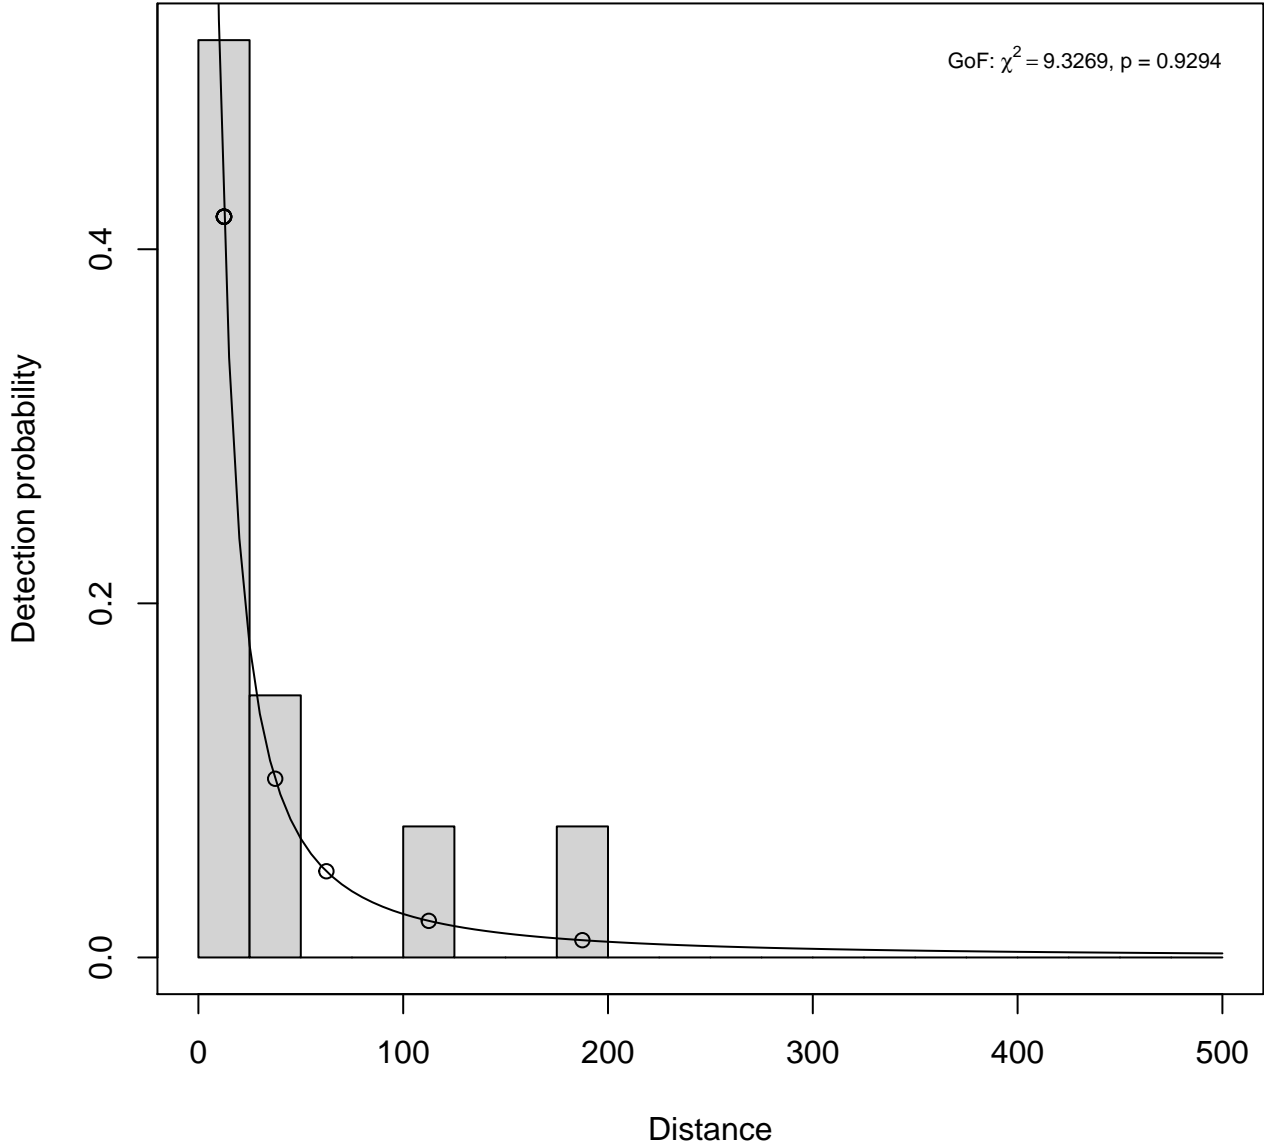

Pionus menstruus – Peruvian Yungas – Peru (N = 11, key function = hn)

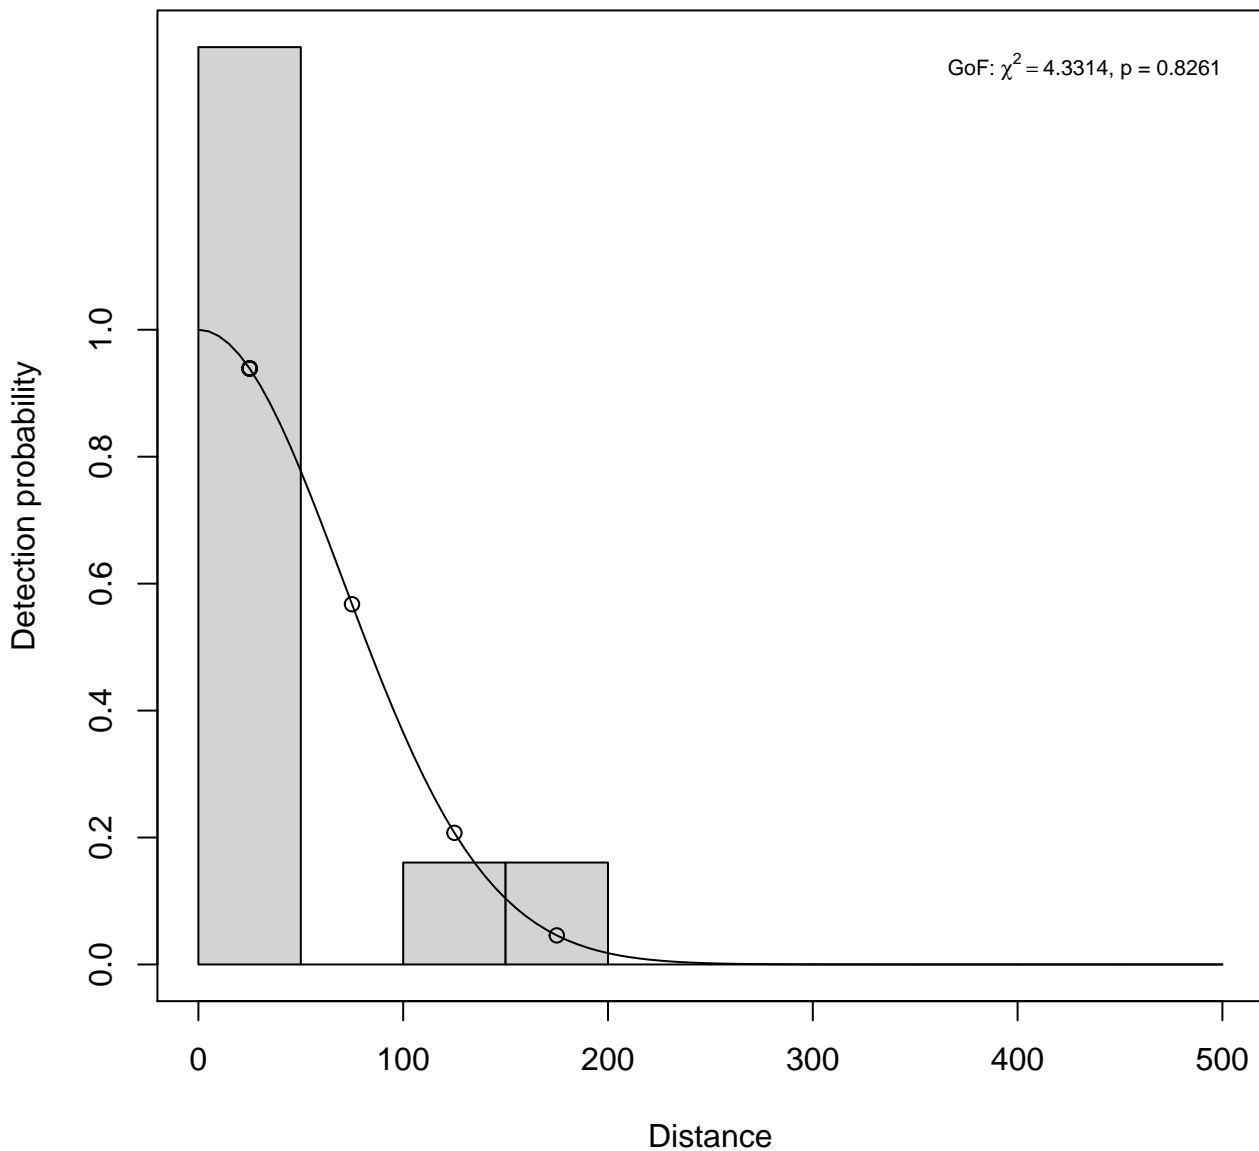

Supplement: s1 [file s1]
