# Supplementary material
Source: MDPI journal article supplement (https://www.mdpi.com/1424-2818/13/7/300)

# **Pionus menstruus – Isthmian–Pacific moist forests – Panama**

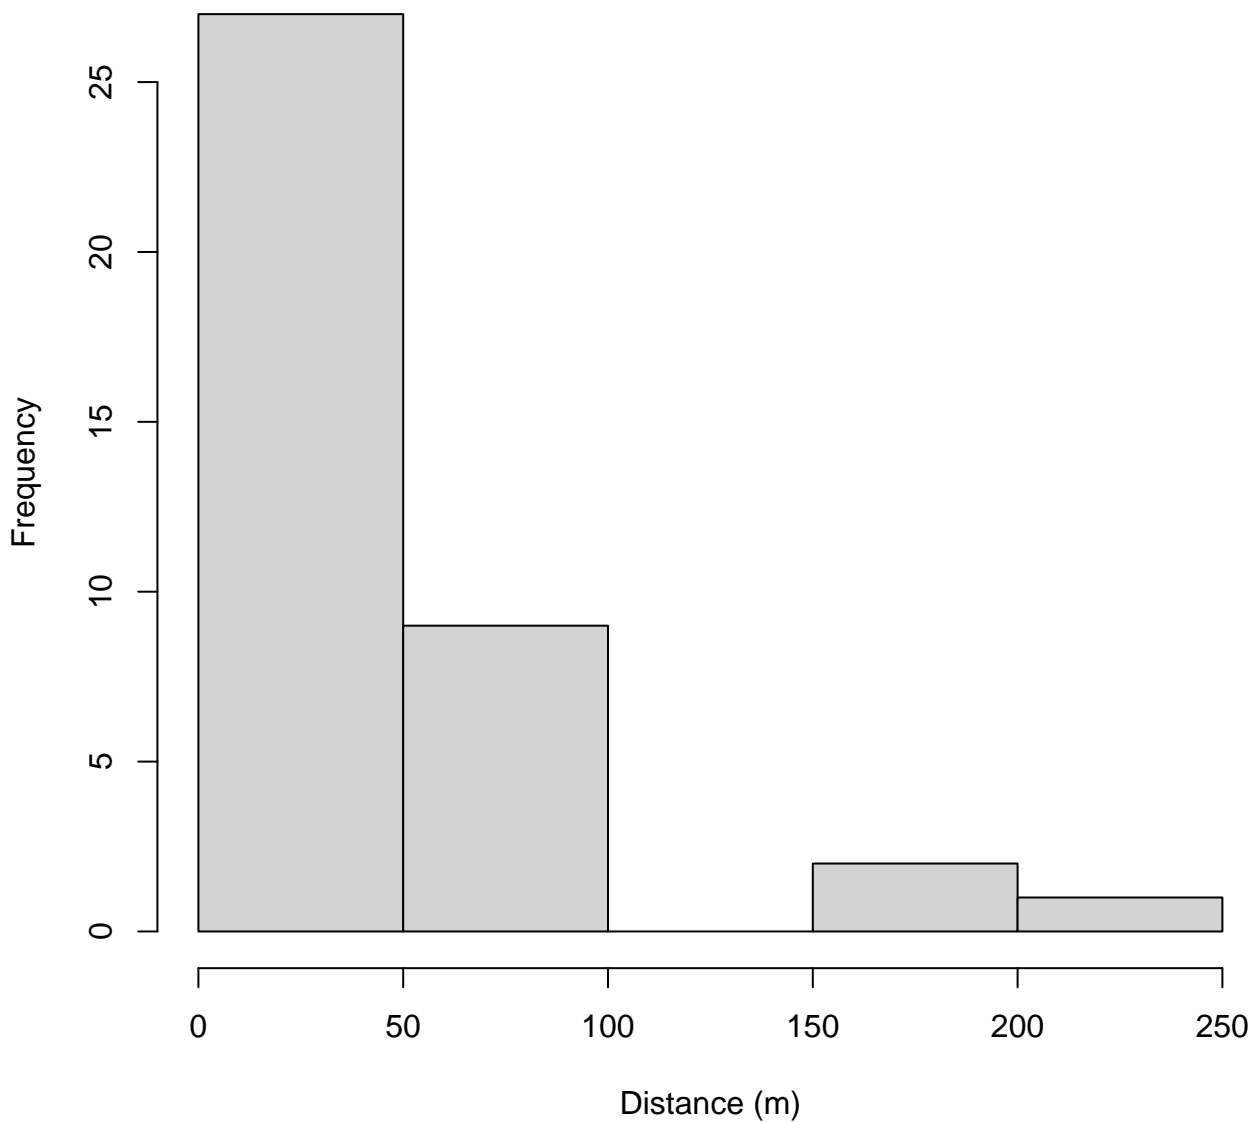

# Pionus menstruus – Isthmian–Pacific moist forests – Panama

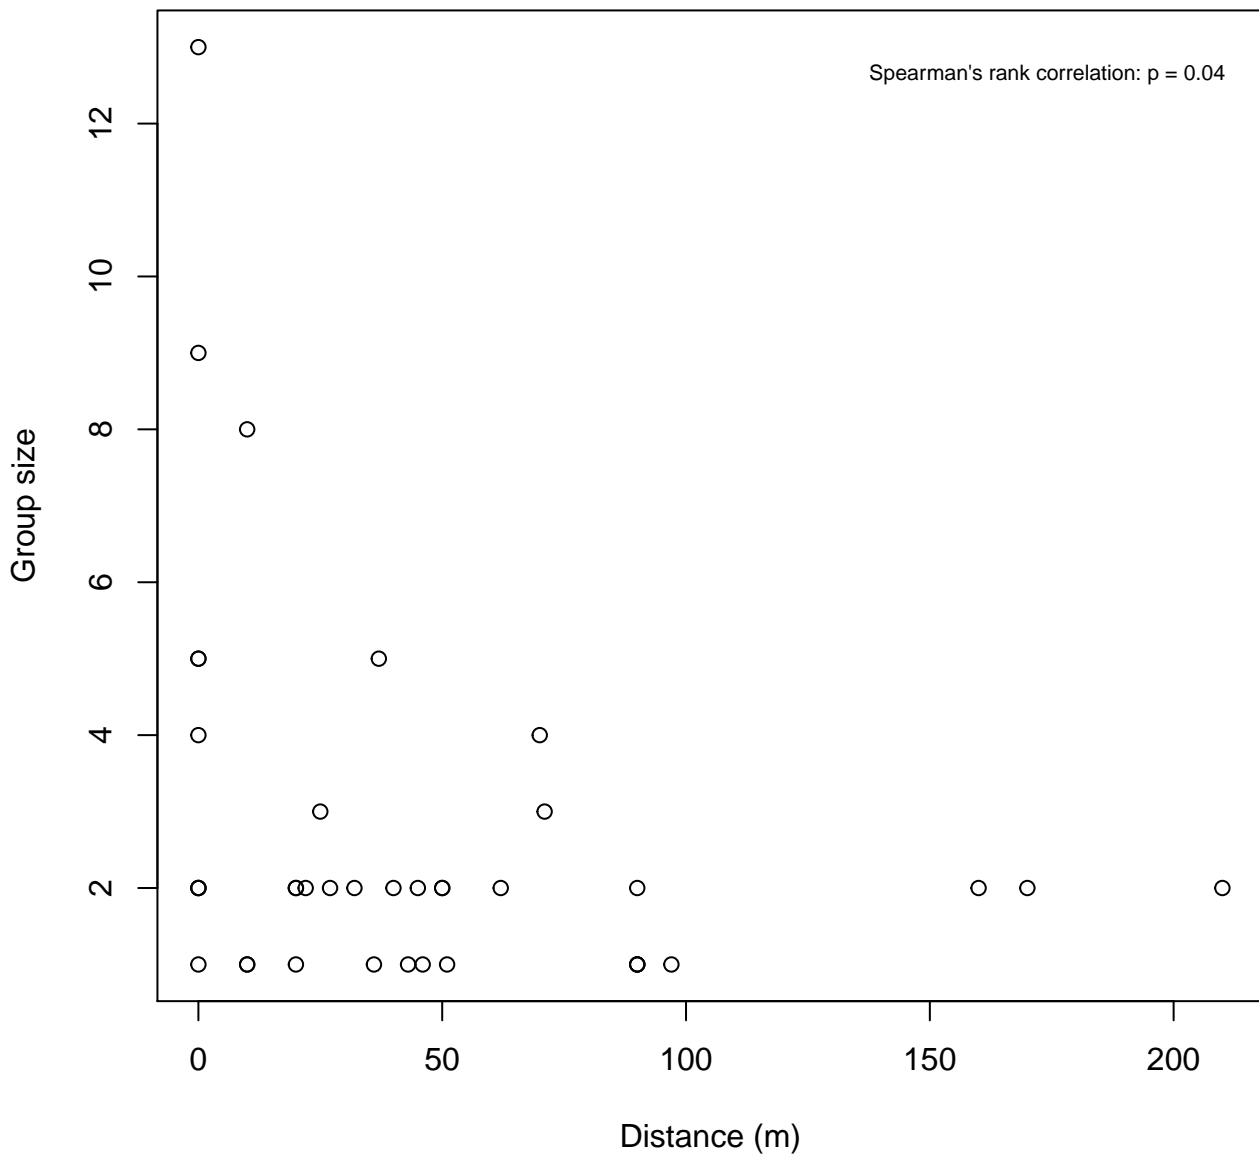

*Pionus menstruus* – Isthmian–Pacific moist forests – Panama (N = 39, key function = hr)

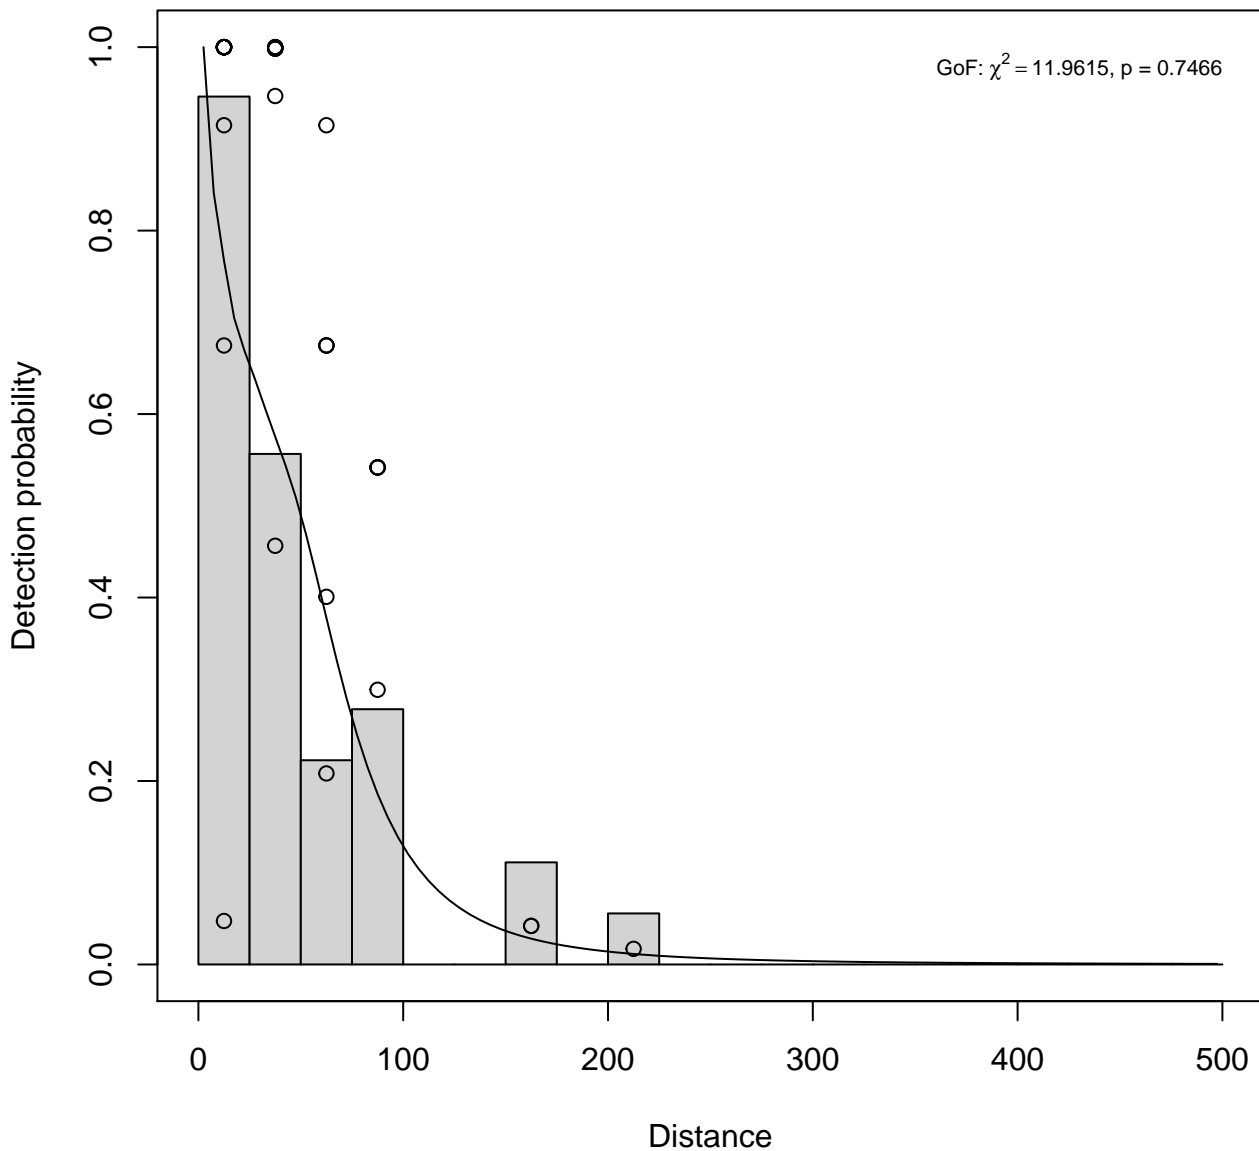

*Pionus menstruus* – Isthmian–Pacific moist forests – Panama (N = 39, key function = hr)

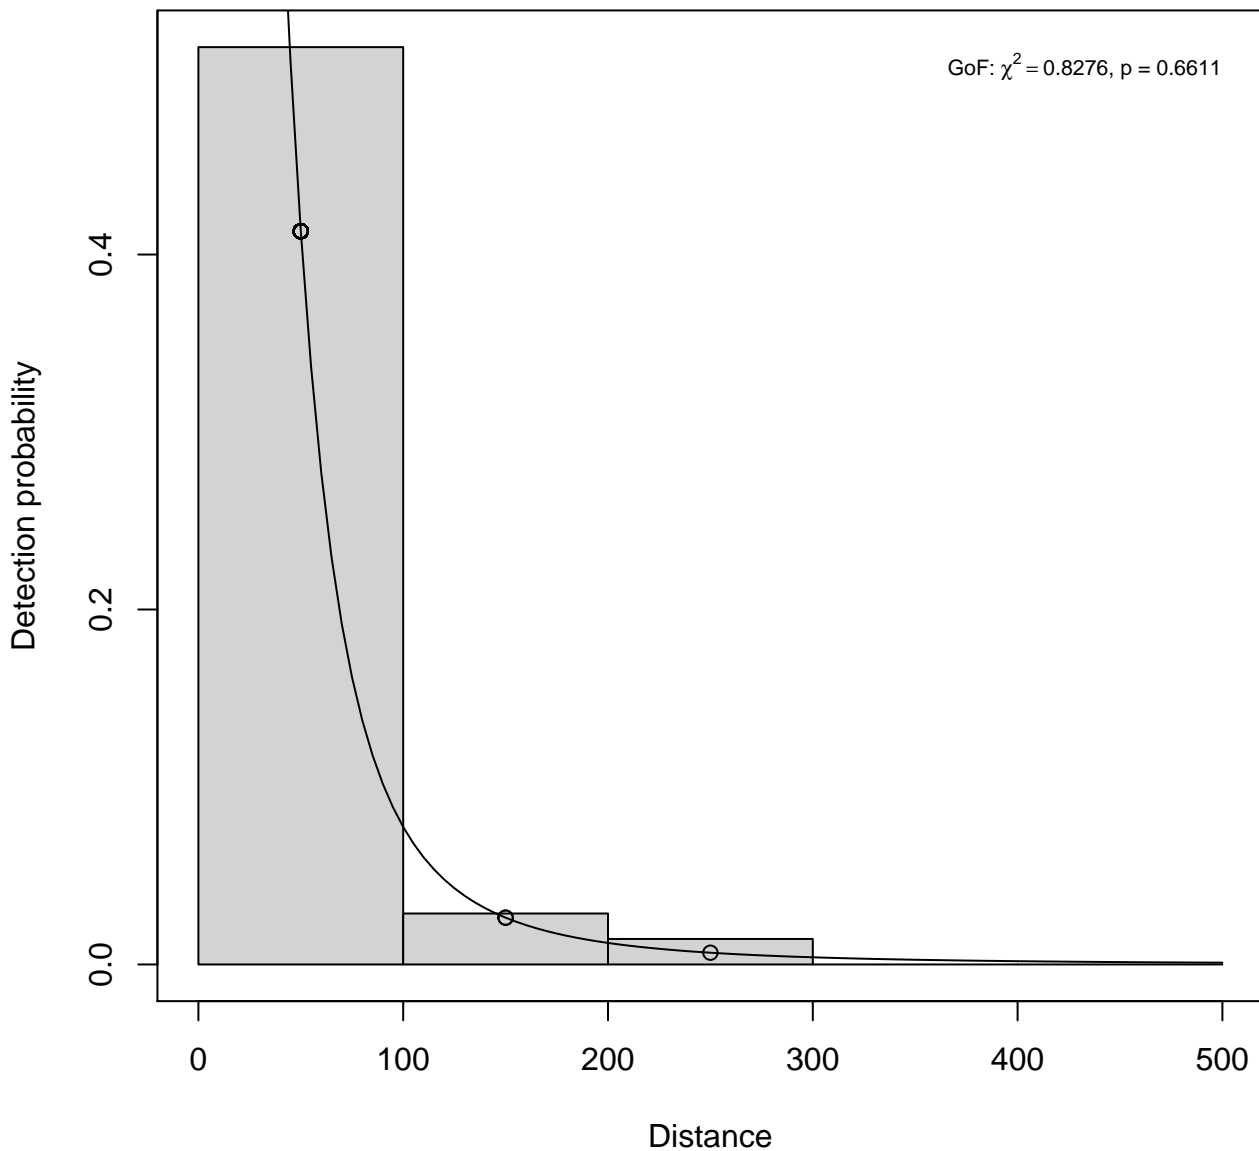

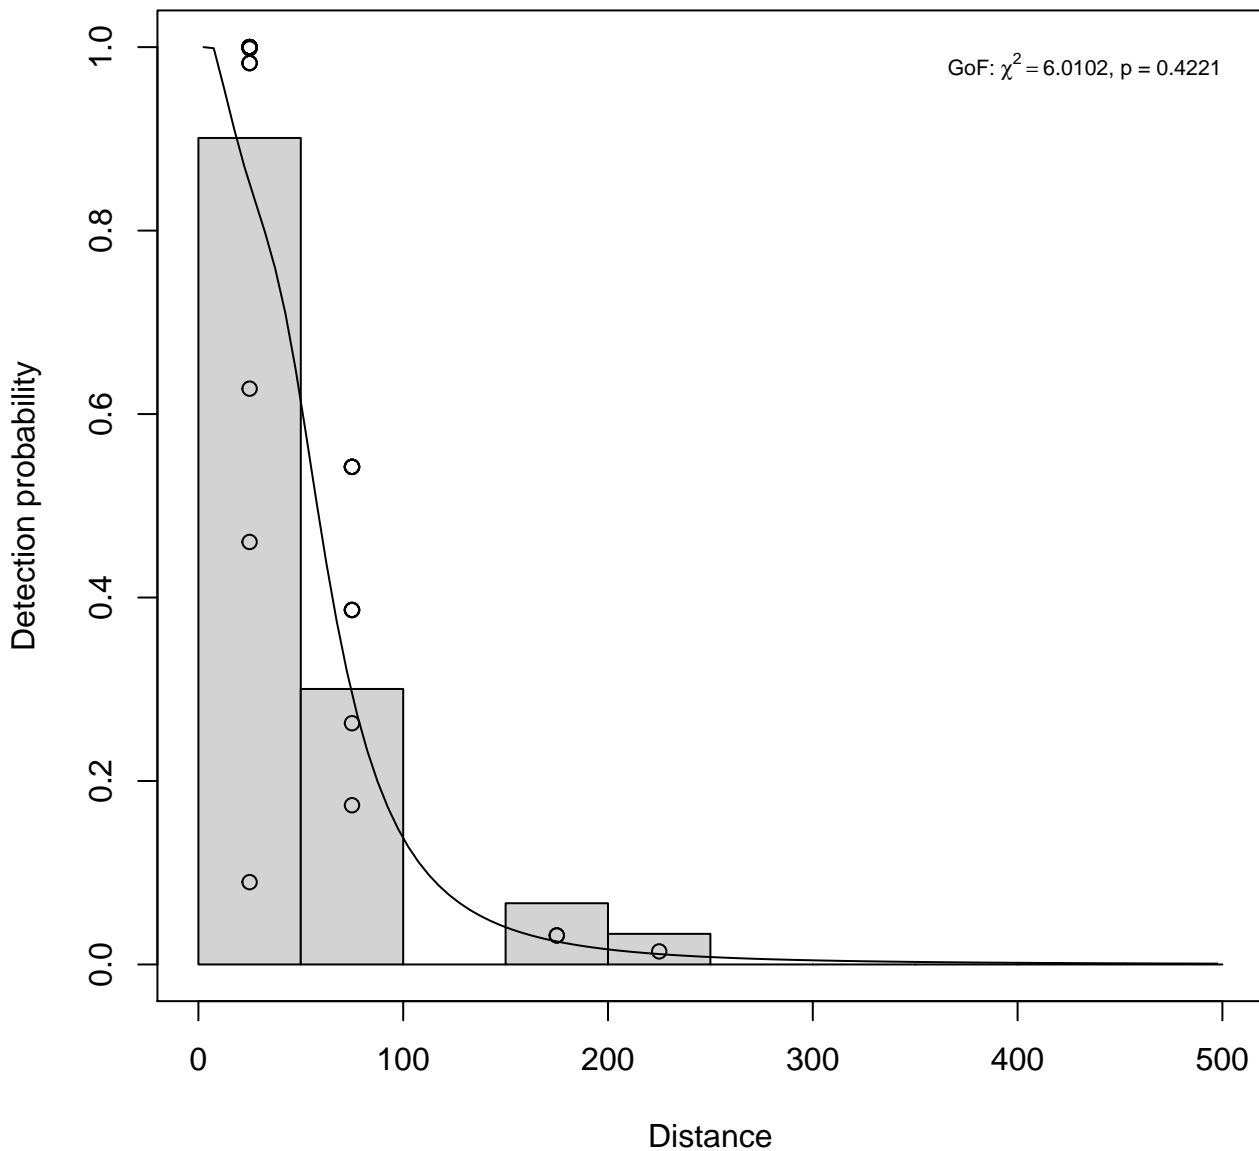

Supplement: s1 [file s1]
