# Supplementary material
Source: MDPI journal article supplement (https://www.mdpi.com/1424-2818/13/7/300)

# Amazona ochrocephala – Beni savanna – Bolivia

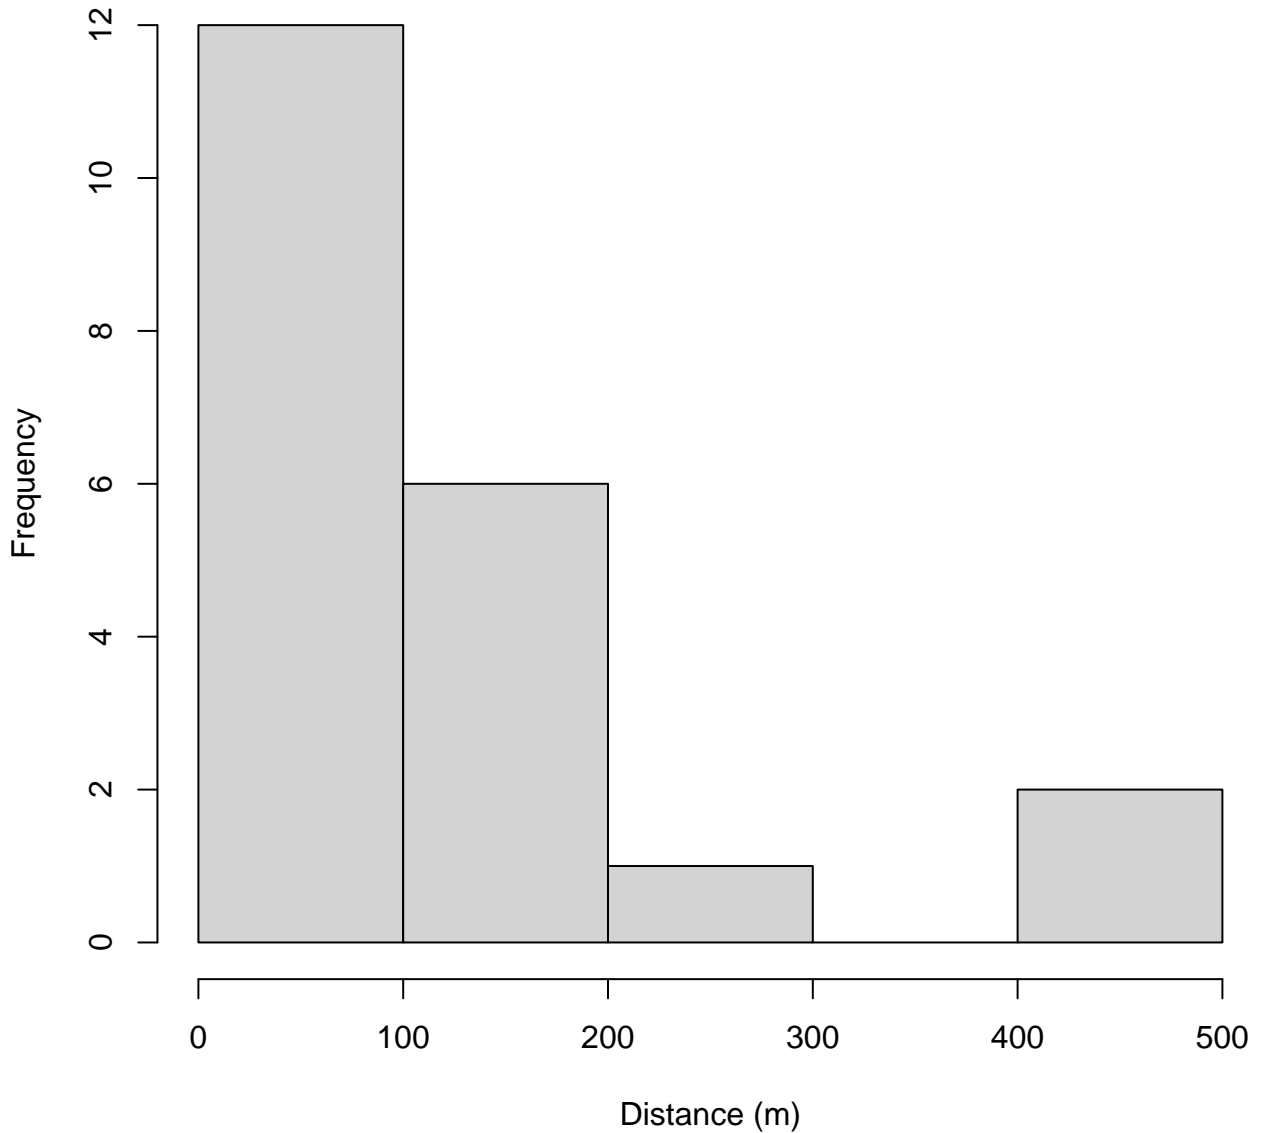

# Amazona ochrocephala – Beni savanna – Bolivia

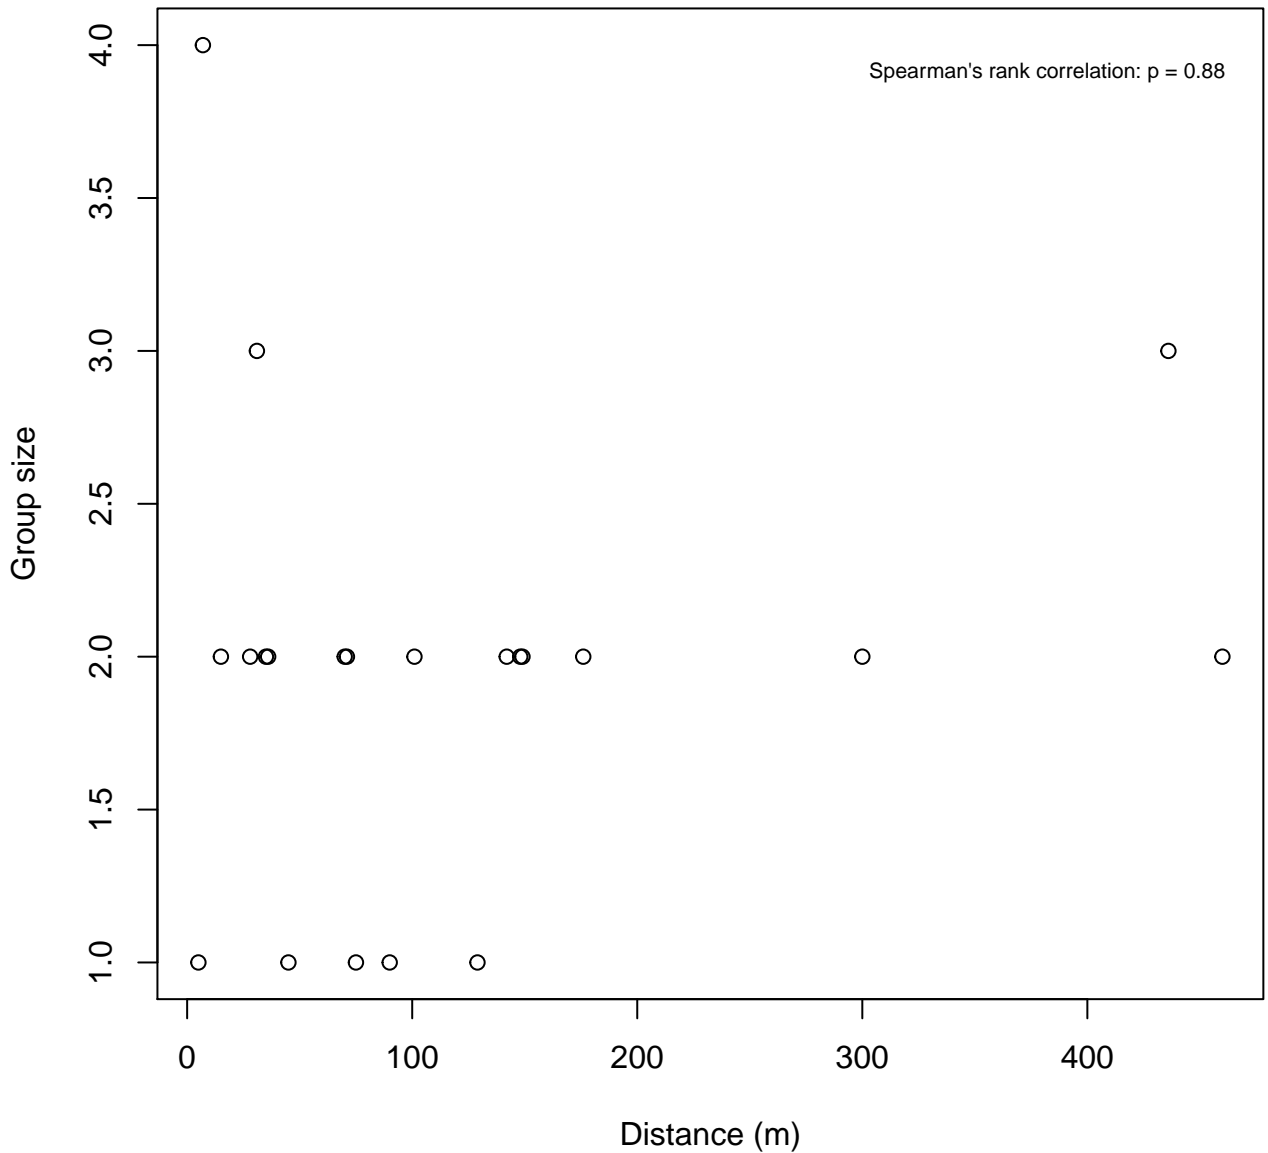

Amazona ochrocephala – Beni savanna – Bolivia (N = 21, key function = hn)

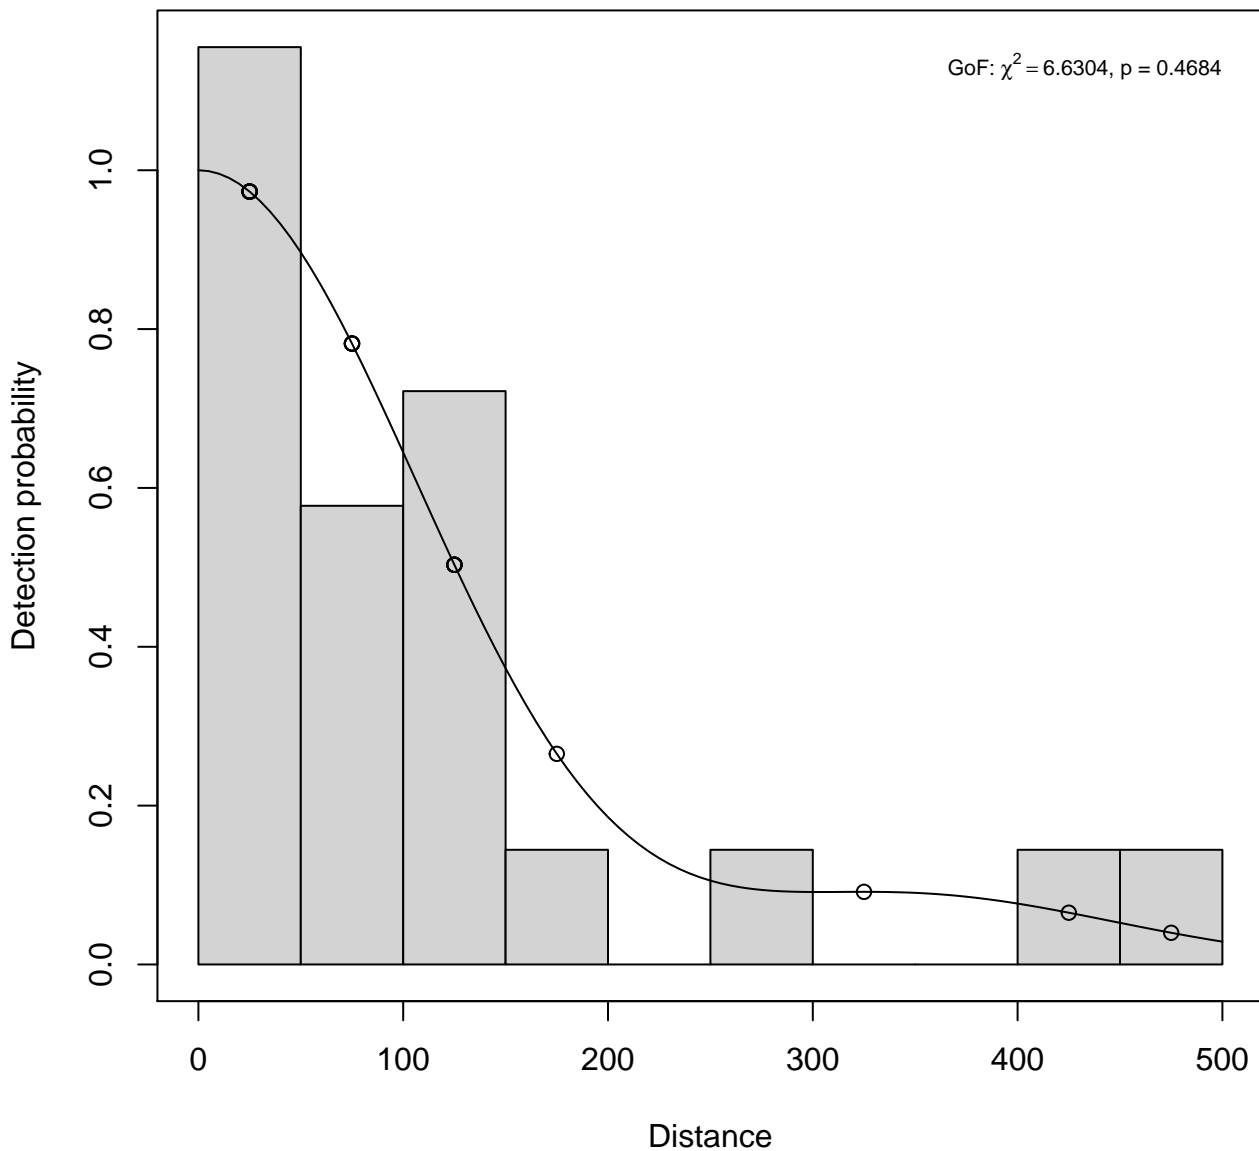

Amazona ochrocephala – Beni savanna – Bolivia (N = 21, key function = hn)

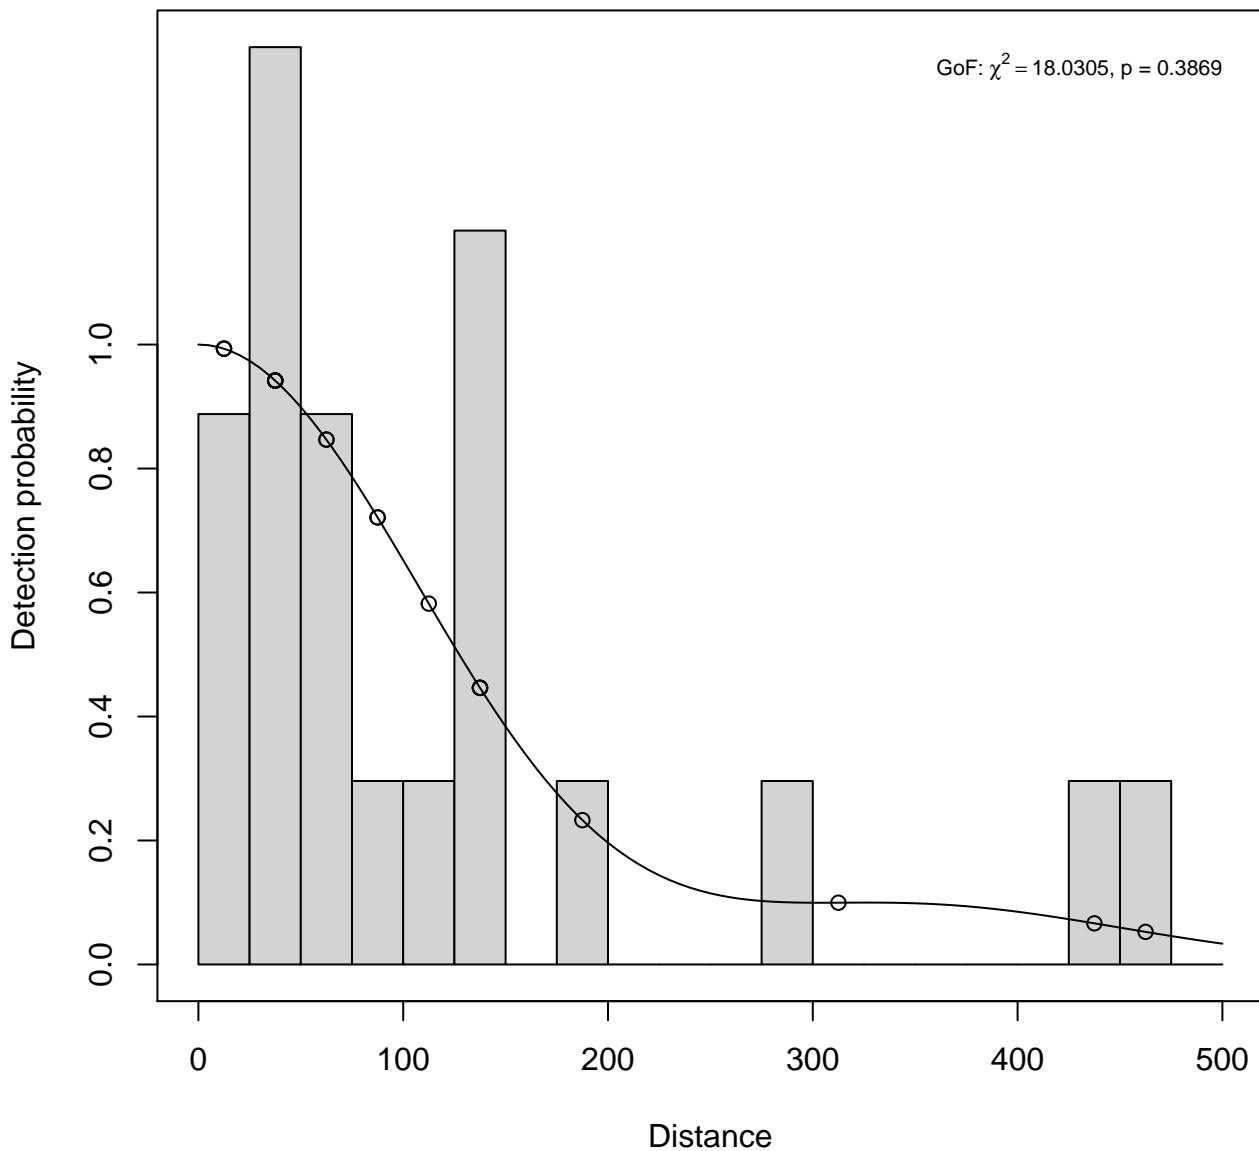

Amazona ochrocephala – Beni savanna – Bolivia (N = 21, key function = hn)

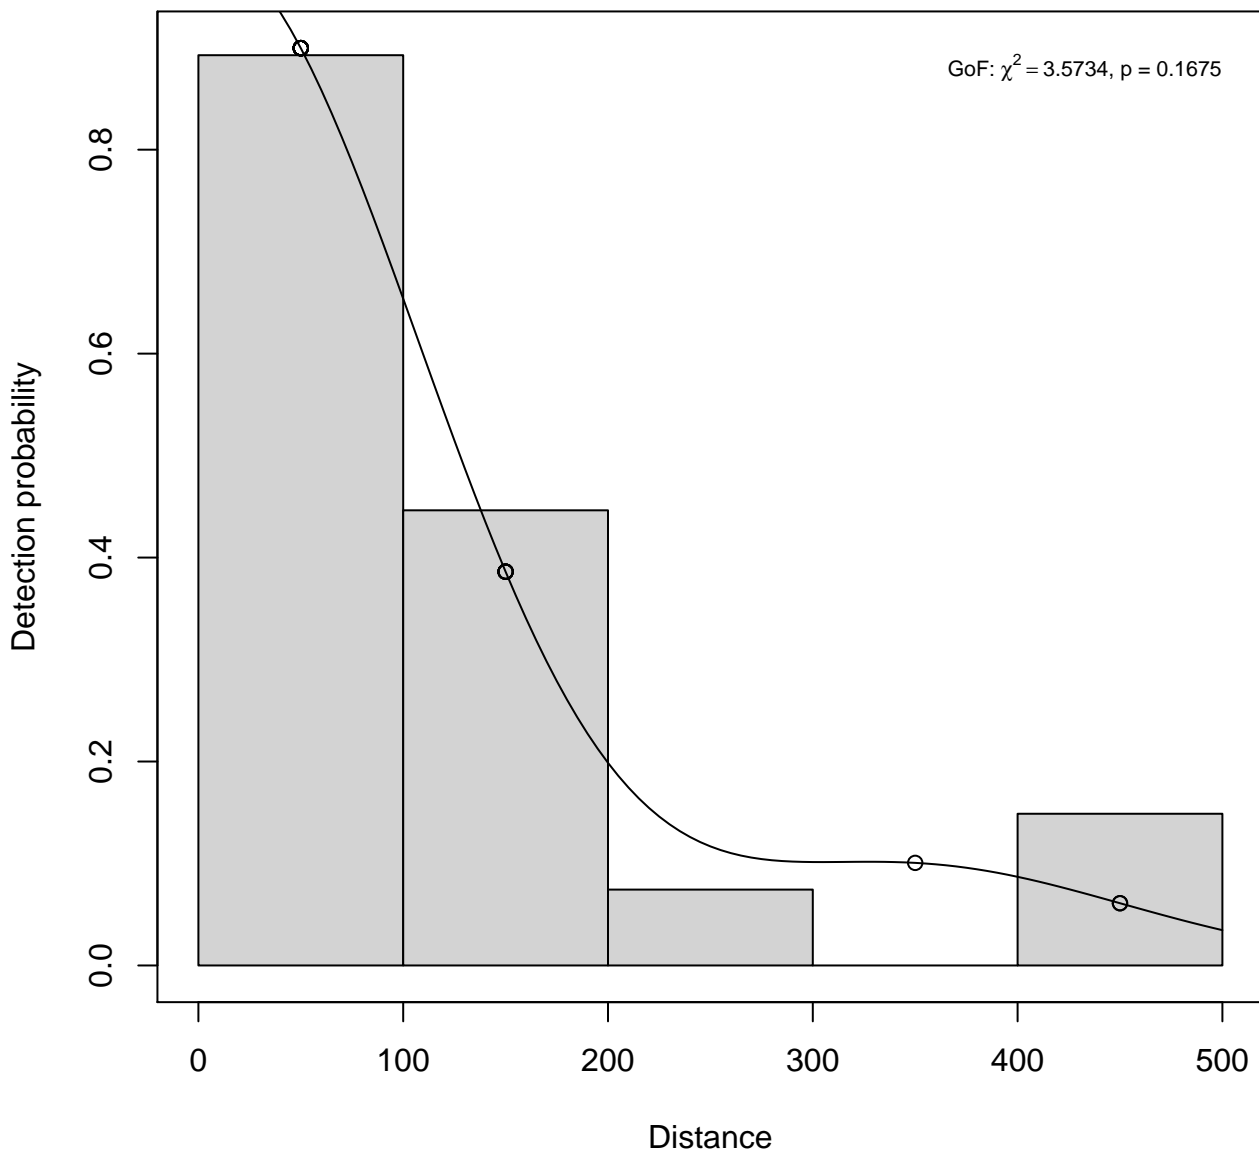

Supplement: s1 [file s1]
