# Supplementary material
Source: MDPI journal article supplement (https://www.mdpi.com/1424-2818/13/7/300)

# **Pionus maximiliani – Southern Andean Yungas – Bolivia**

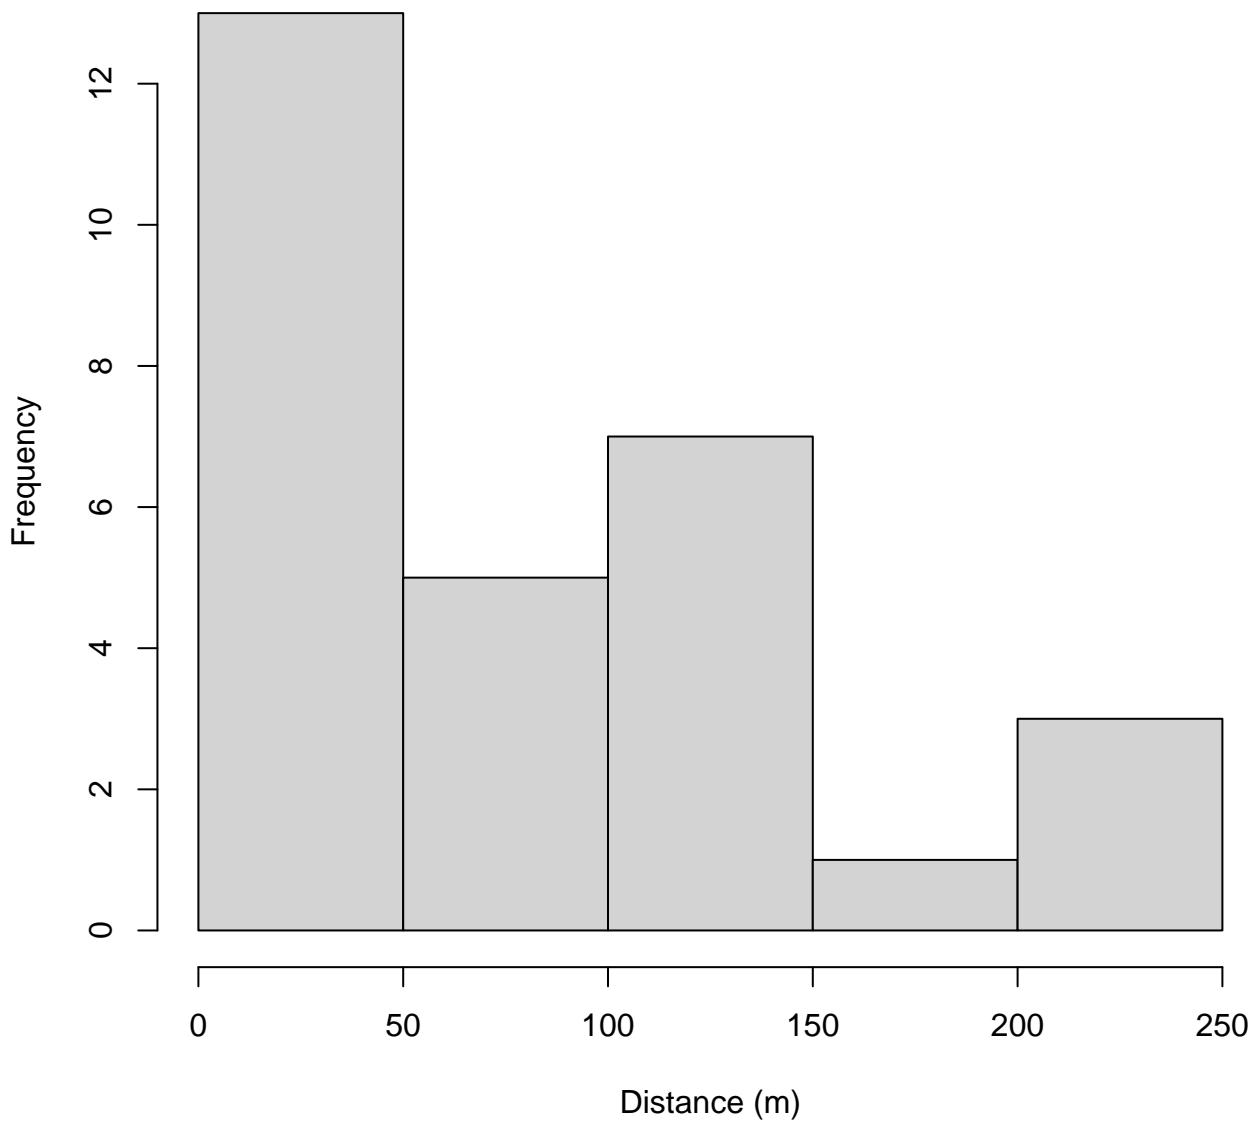

# **Pionus maximiliani – Southern Andean Yungas – Bolivia**

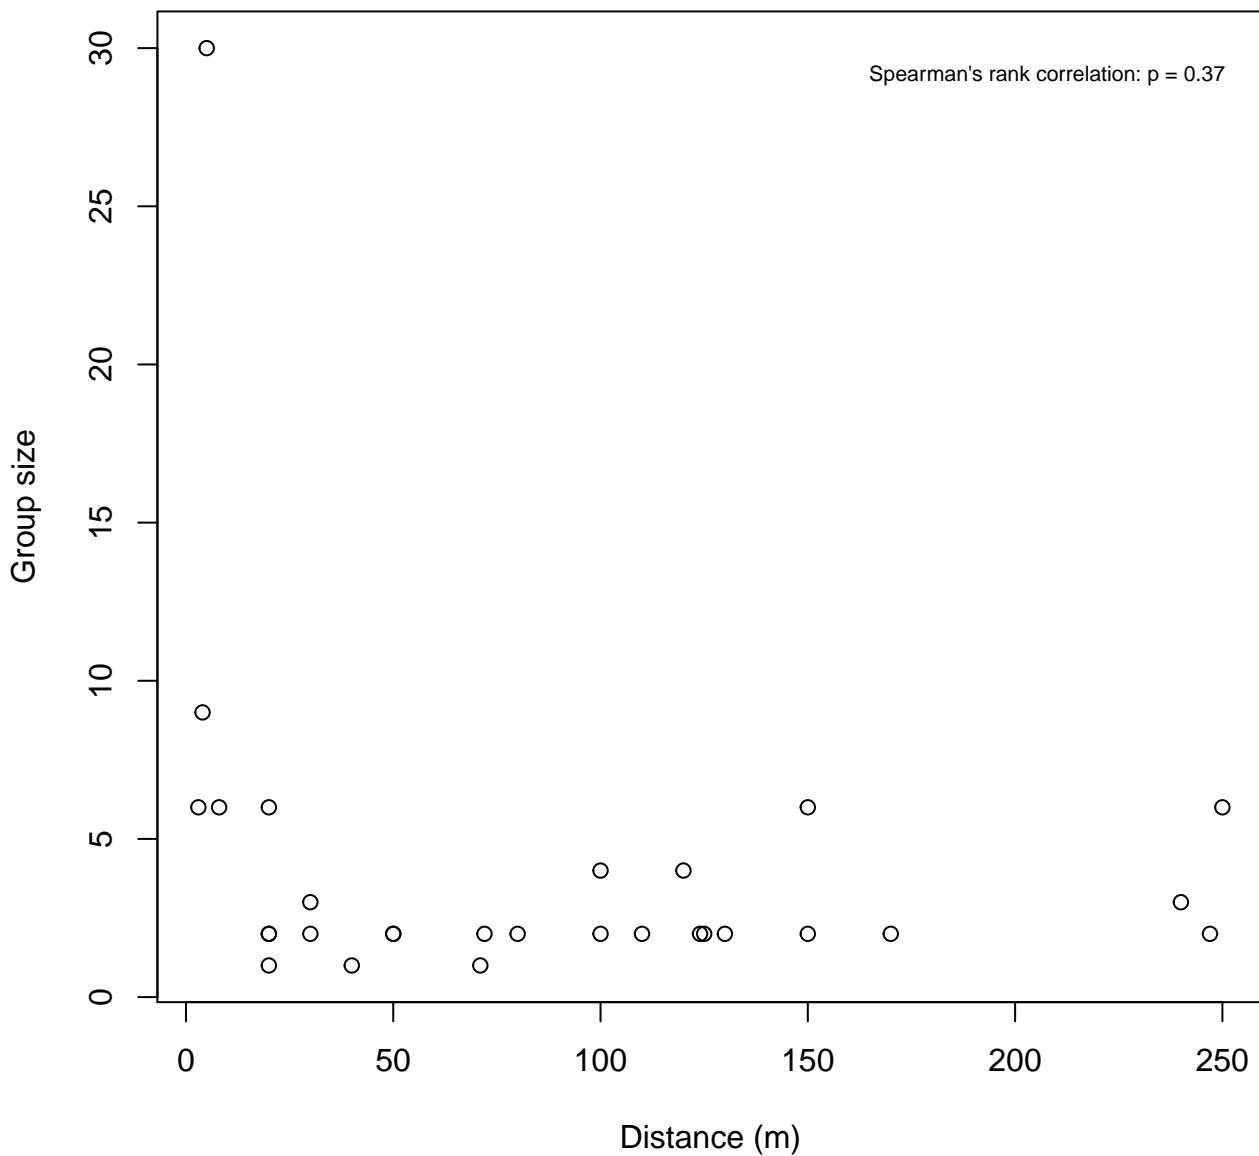

Pionus maximiliani – Southern Andean Yungas – Bolivia (N = 29, key function = hn)

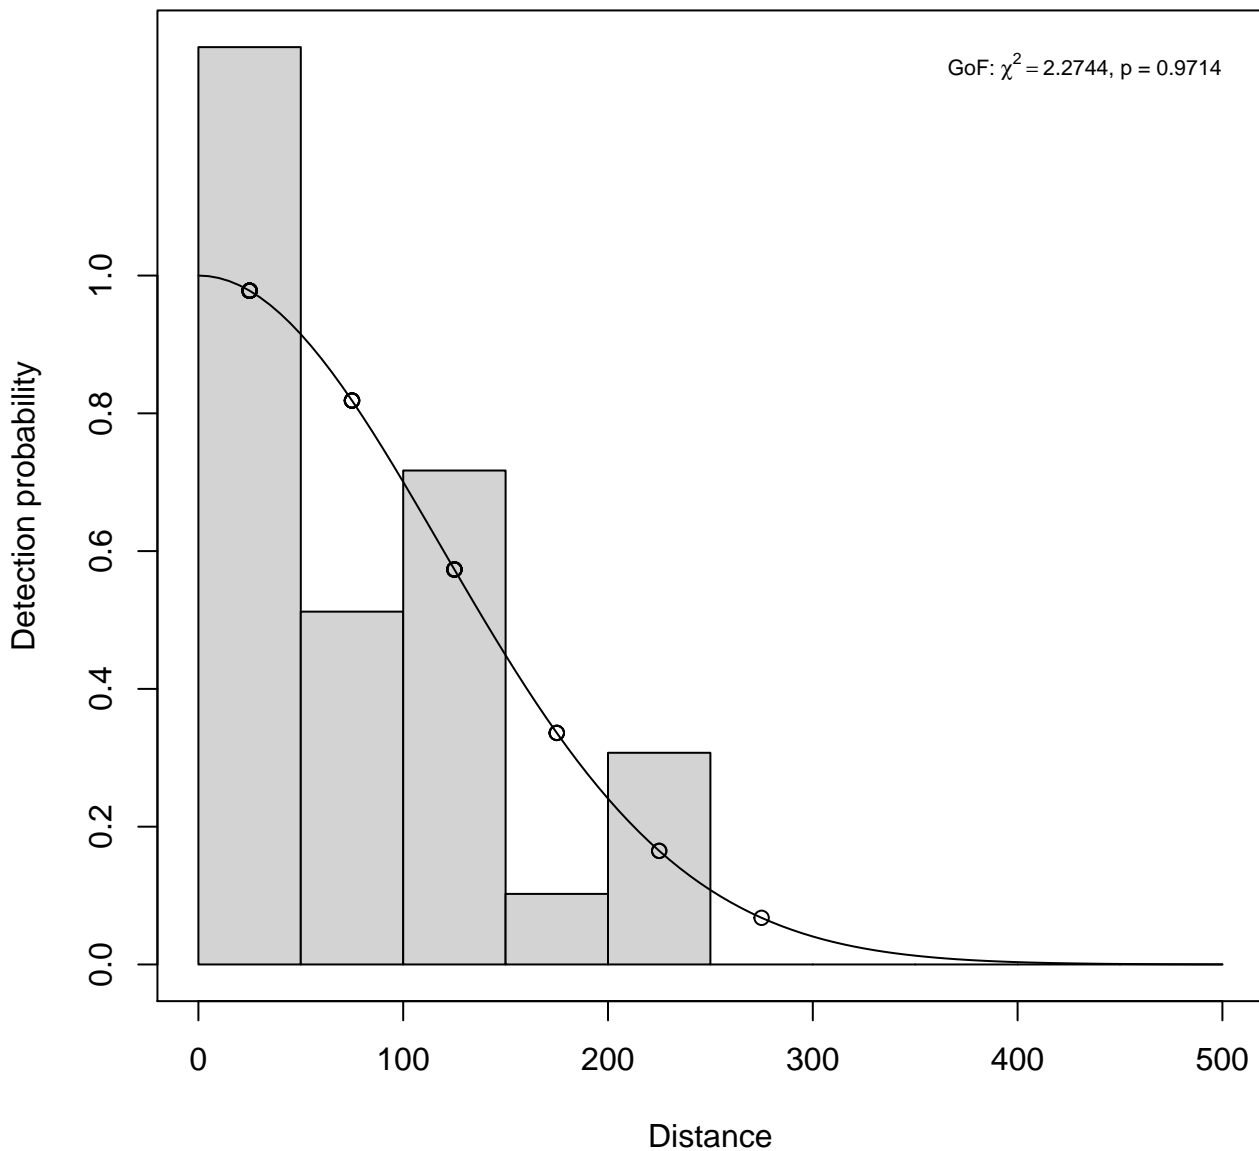

Pionus maximiliani – Southern Andean Yungas – Bolivia (N = 29, key function = hn)

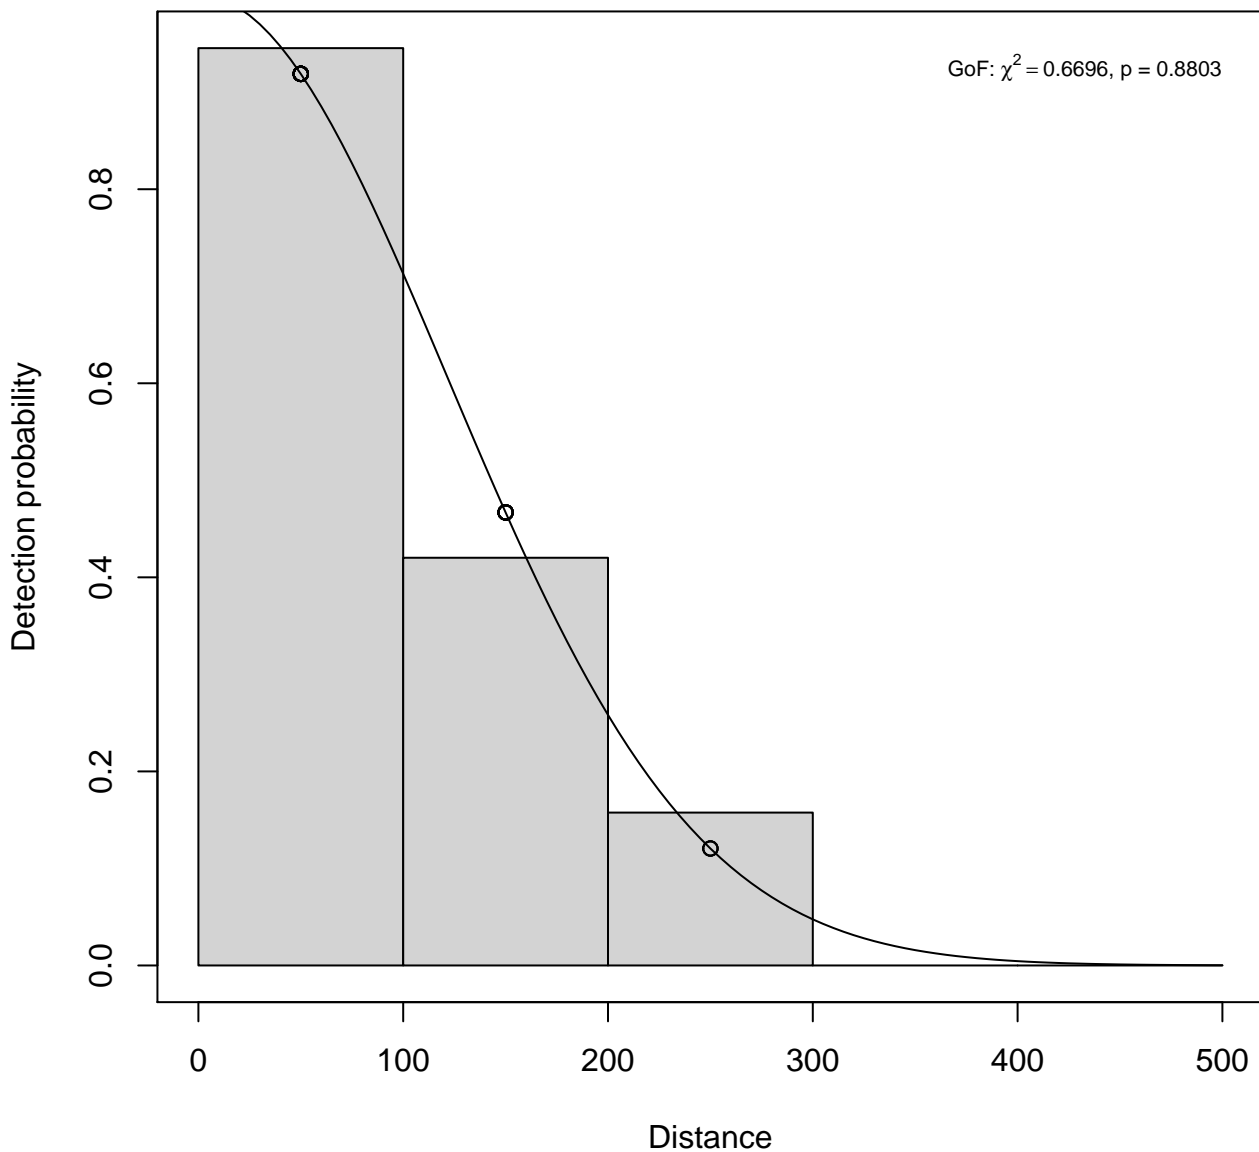

Pionus maximiliani – Southern Andean Yungas – Bolivia (N = 29, key function = hn)

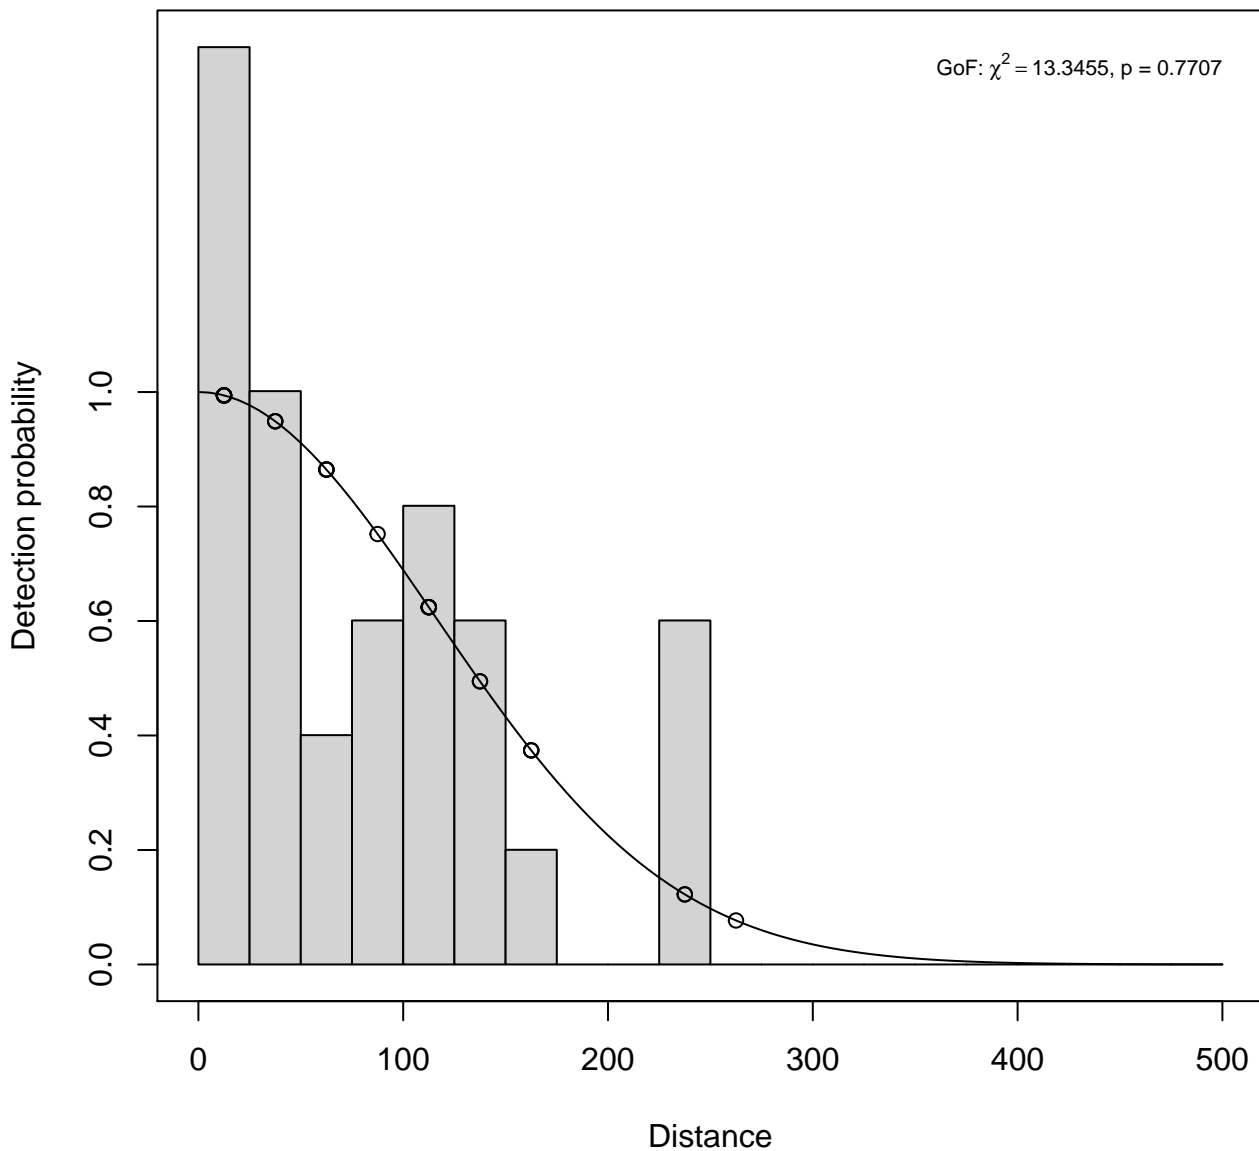

Supplement: s1 [file s1]
