# Supplementary material
Source: MDPI journal article supplement (https://www.mdpi.com/1424-2818/13/7/300)

# Pyrrhura frontalis – Araucaria moist forests – Brazil

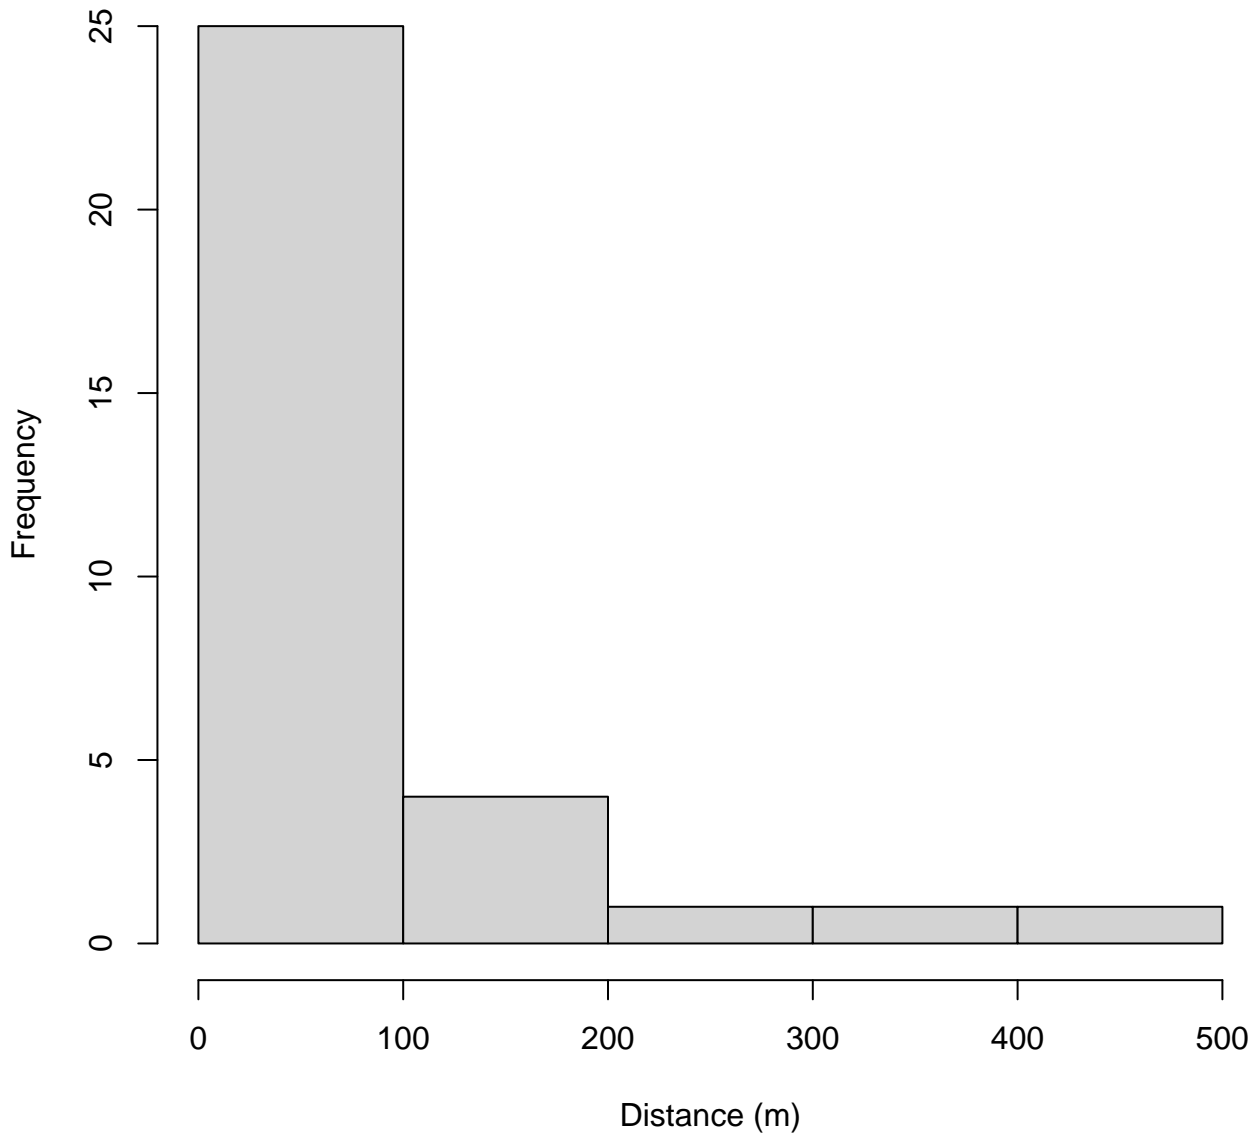

# Pyrrhura frontalis – Araucaria moist forests – Brazil

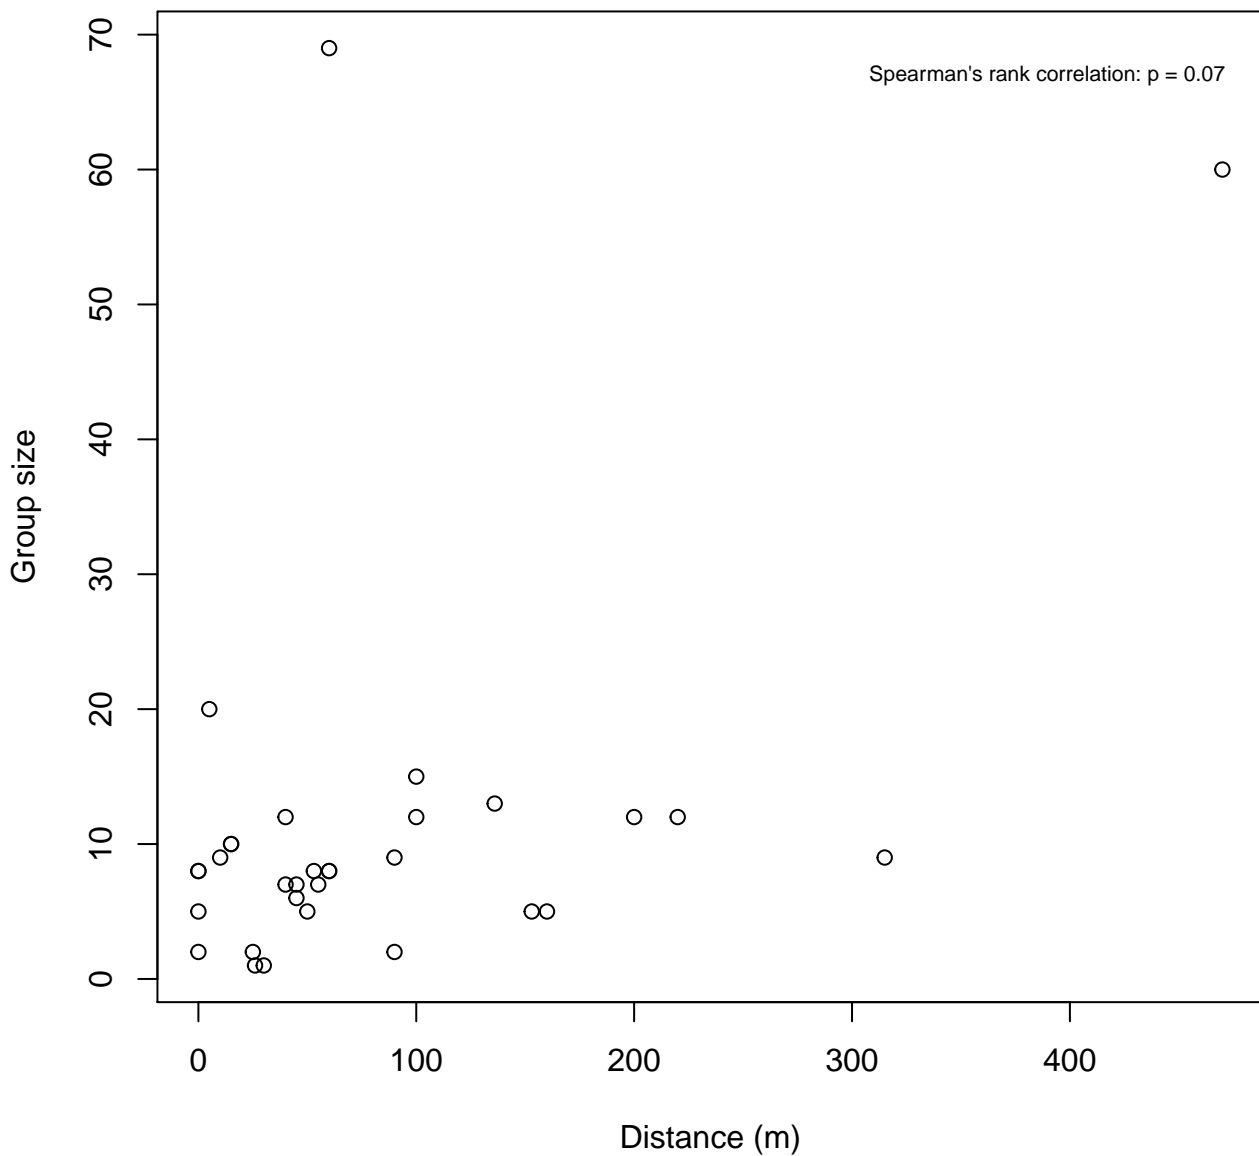

*Pyrrhura frontalis* – Araucaria moist forests – Brazil (N = 32, key function = hr)

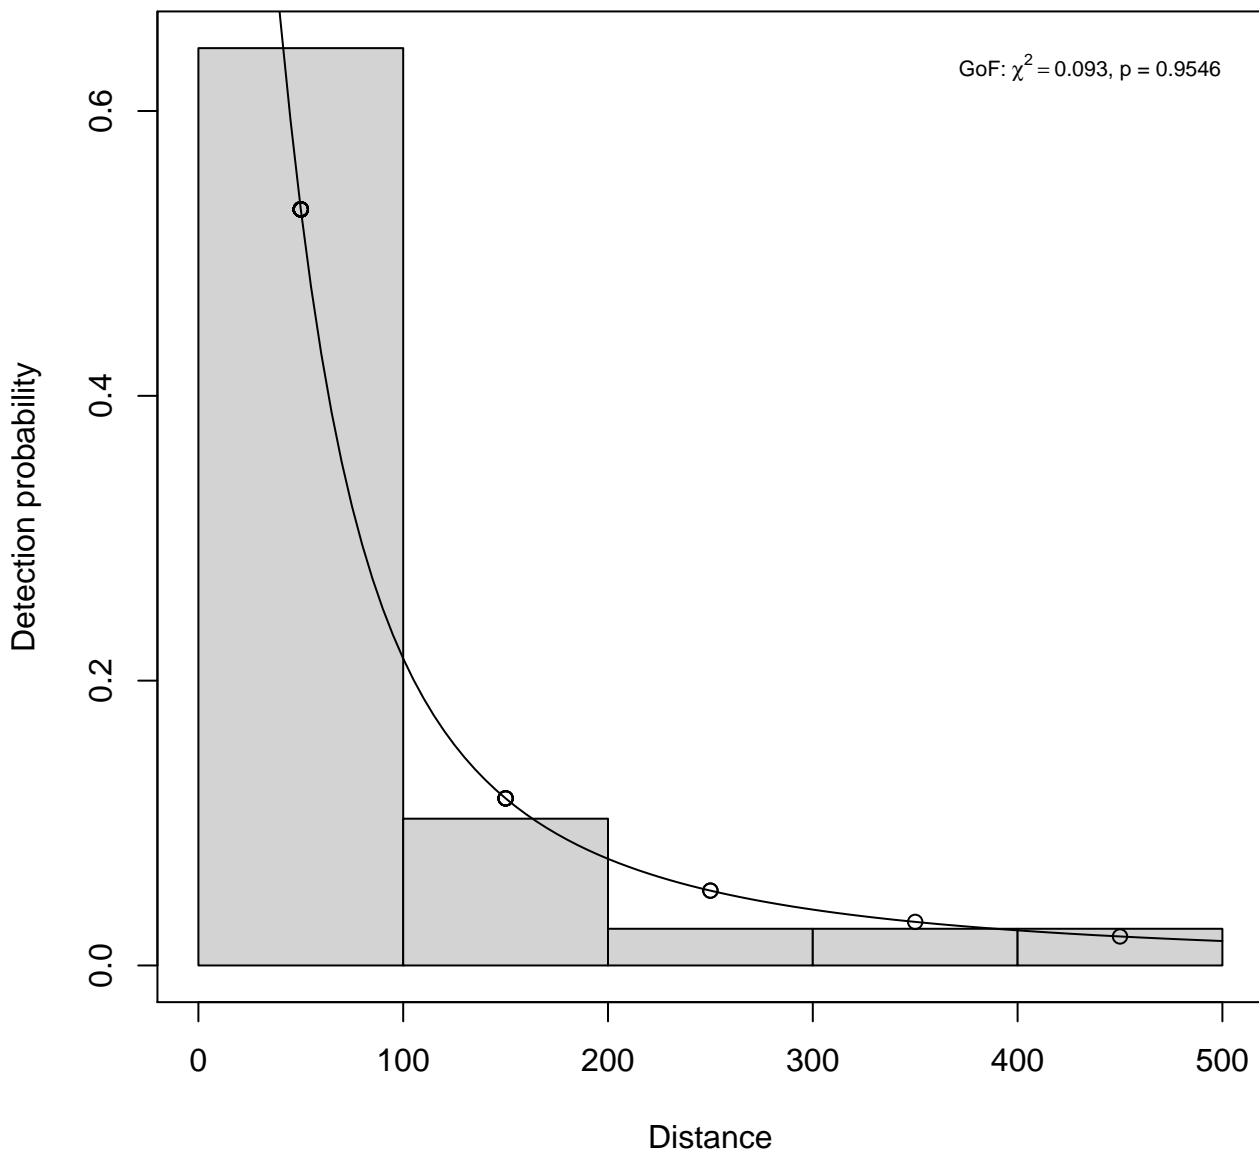

*Pyrrhura frontalis* – Araucaria moist forests – Brazil (N = 32, key function = hr)

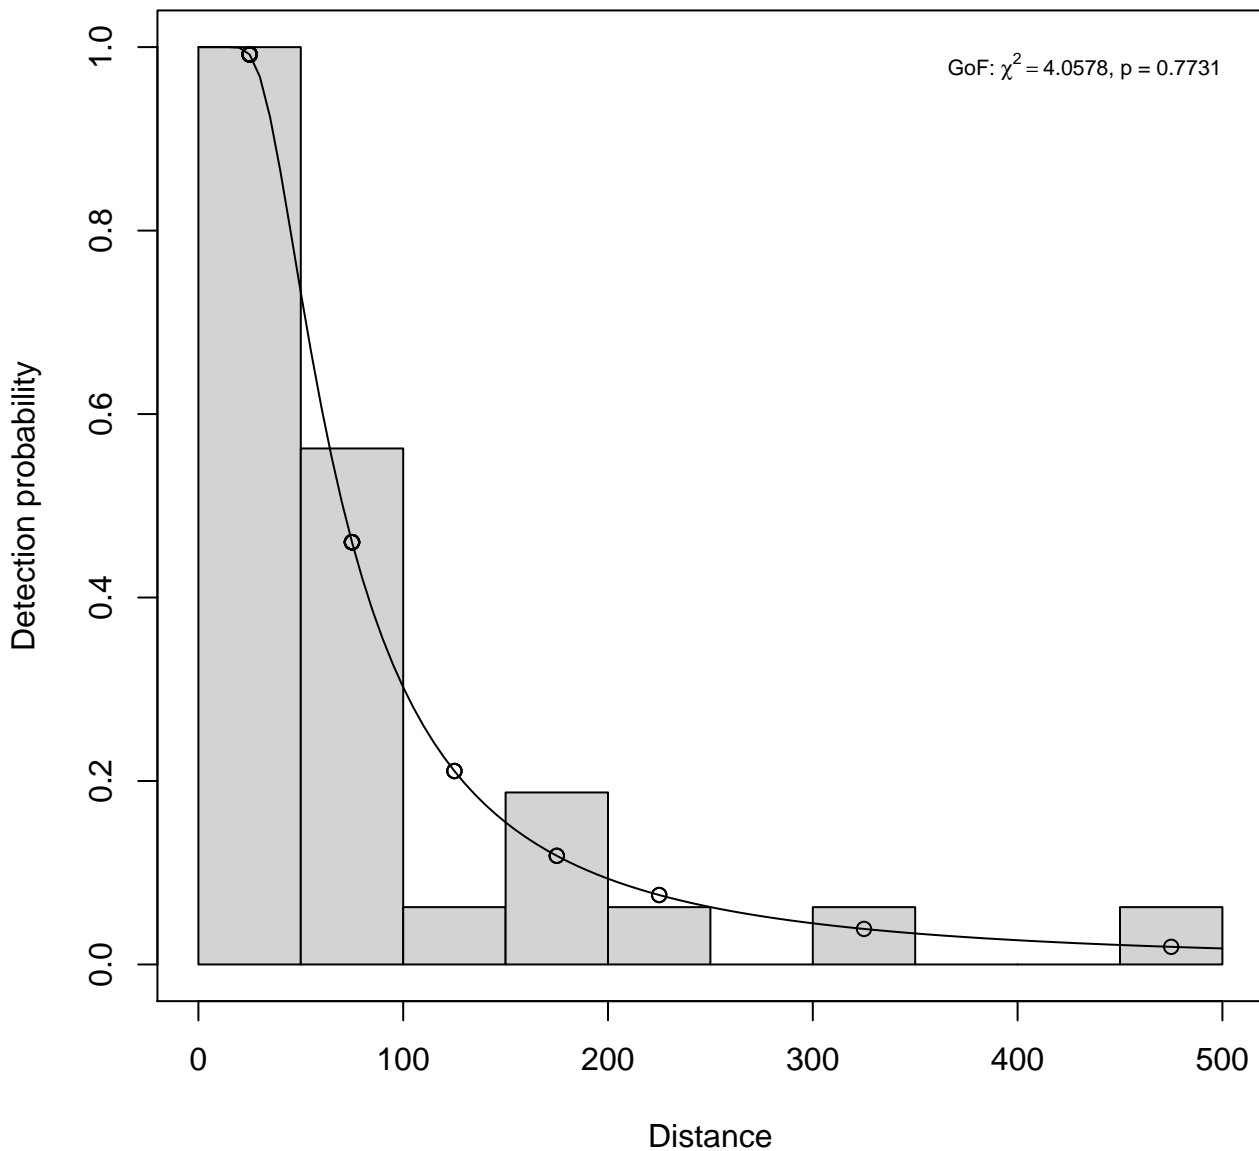

*Pyrrhura frontalis* – Araucaria moist forests – Brazil (N = 32, key function = hr)

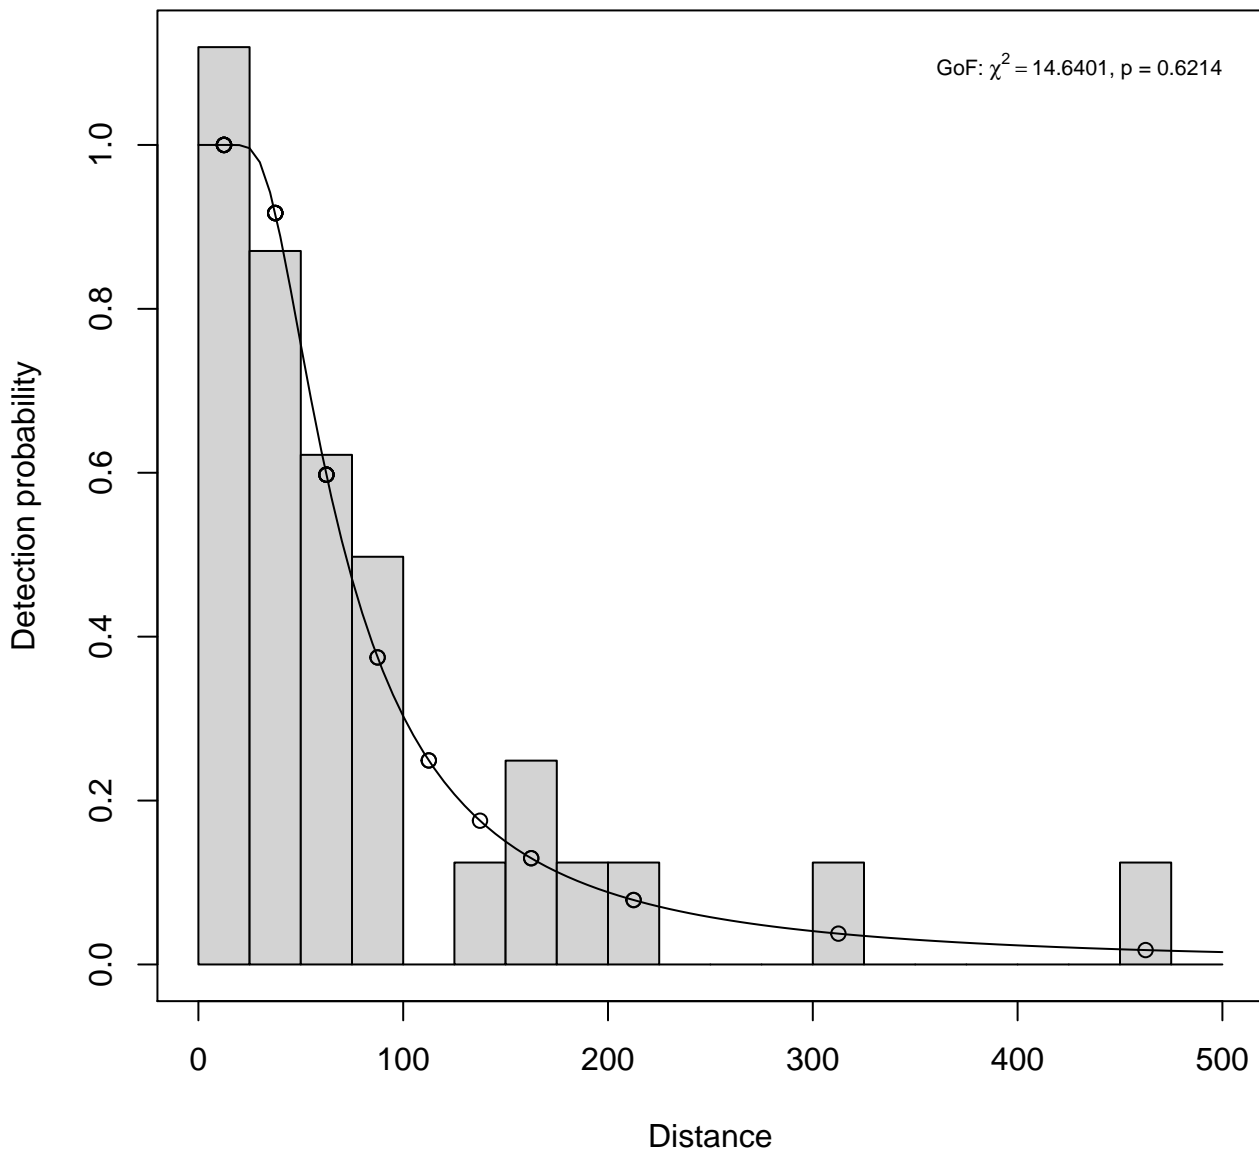

Supplement: s1 [file s1]
