# Supplementary material
Source: MDPI journal article supplement (https://www.mdpi.com/1424-2818/13/7/300)

**Forpus passerinus – Guajira–Barranquilla xeric scrub – Colombia**

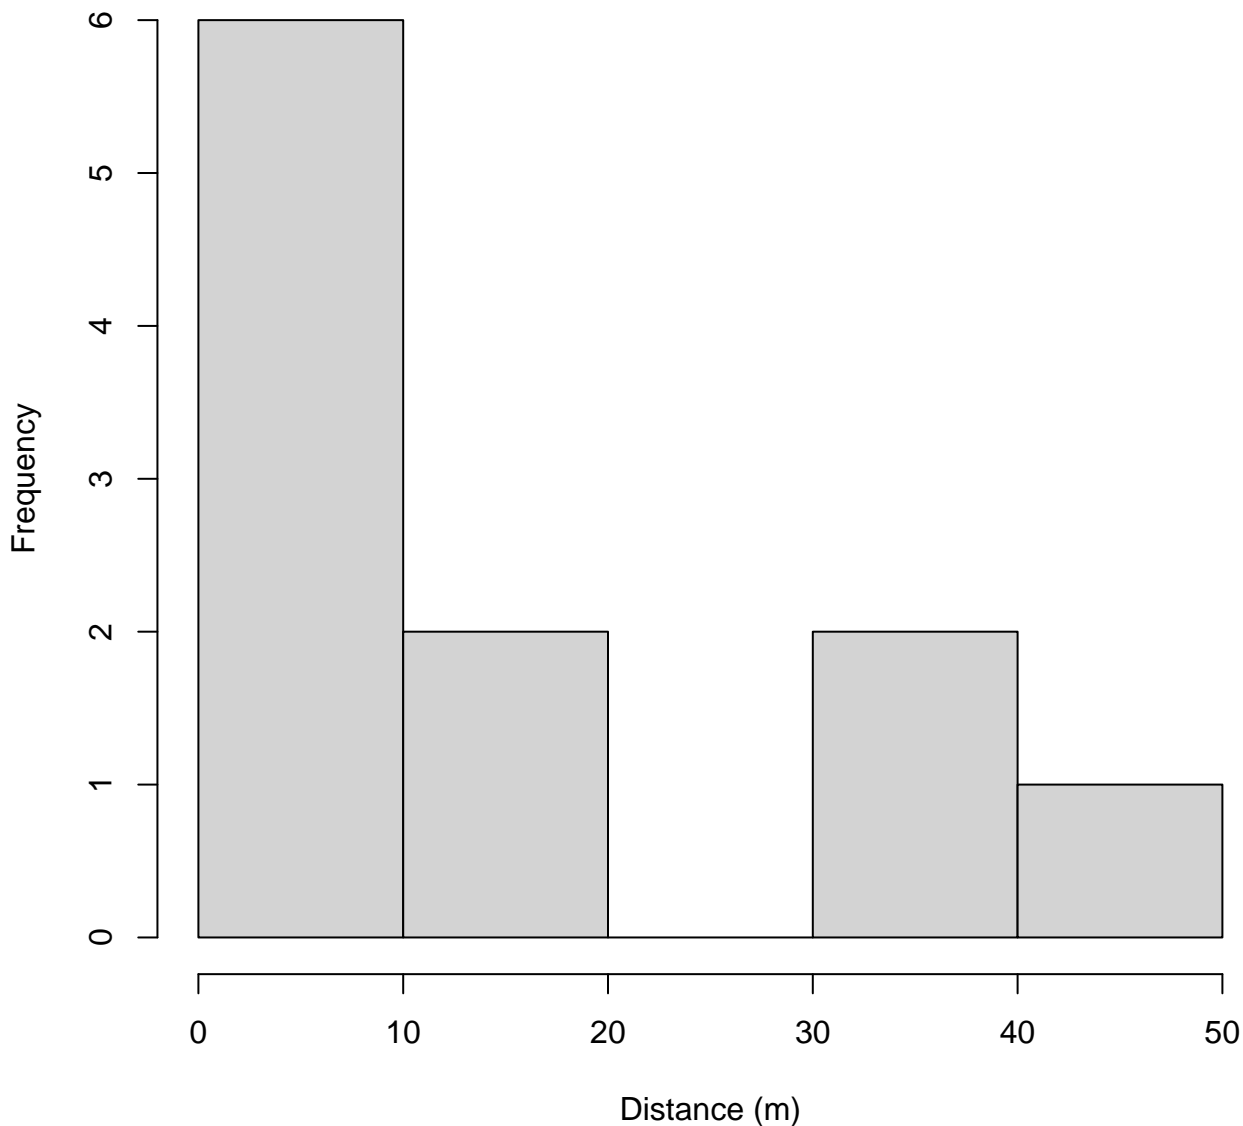

# Forpus passerinus – Guajira–Barranquilla xeric scrub – Colombia

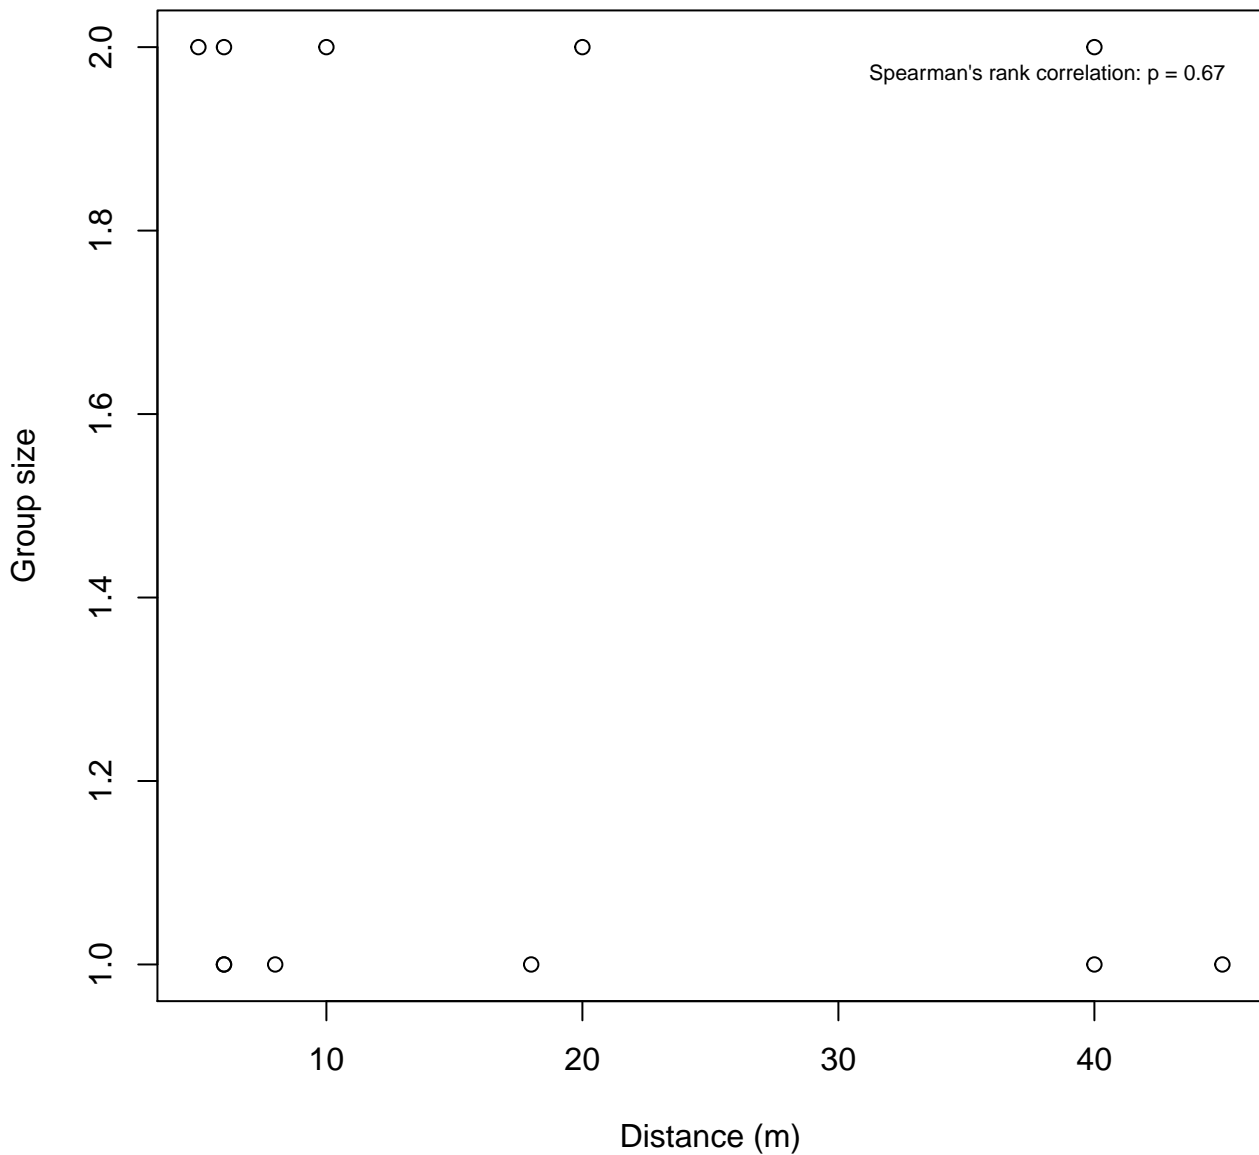

Forpus passerinus – Guajira–Barranquilla xeric scrub – Colombia (N = 11, key function = hn)

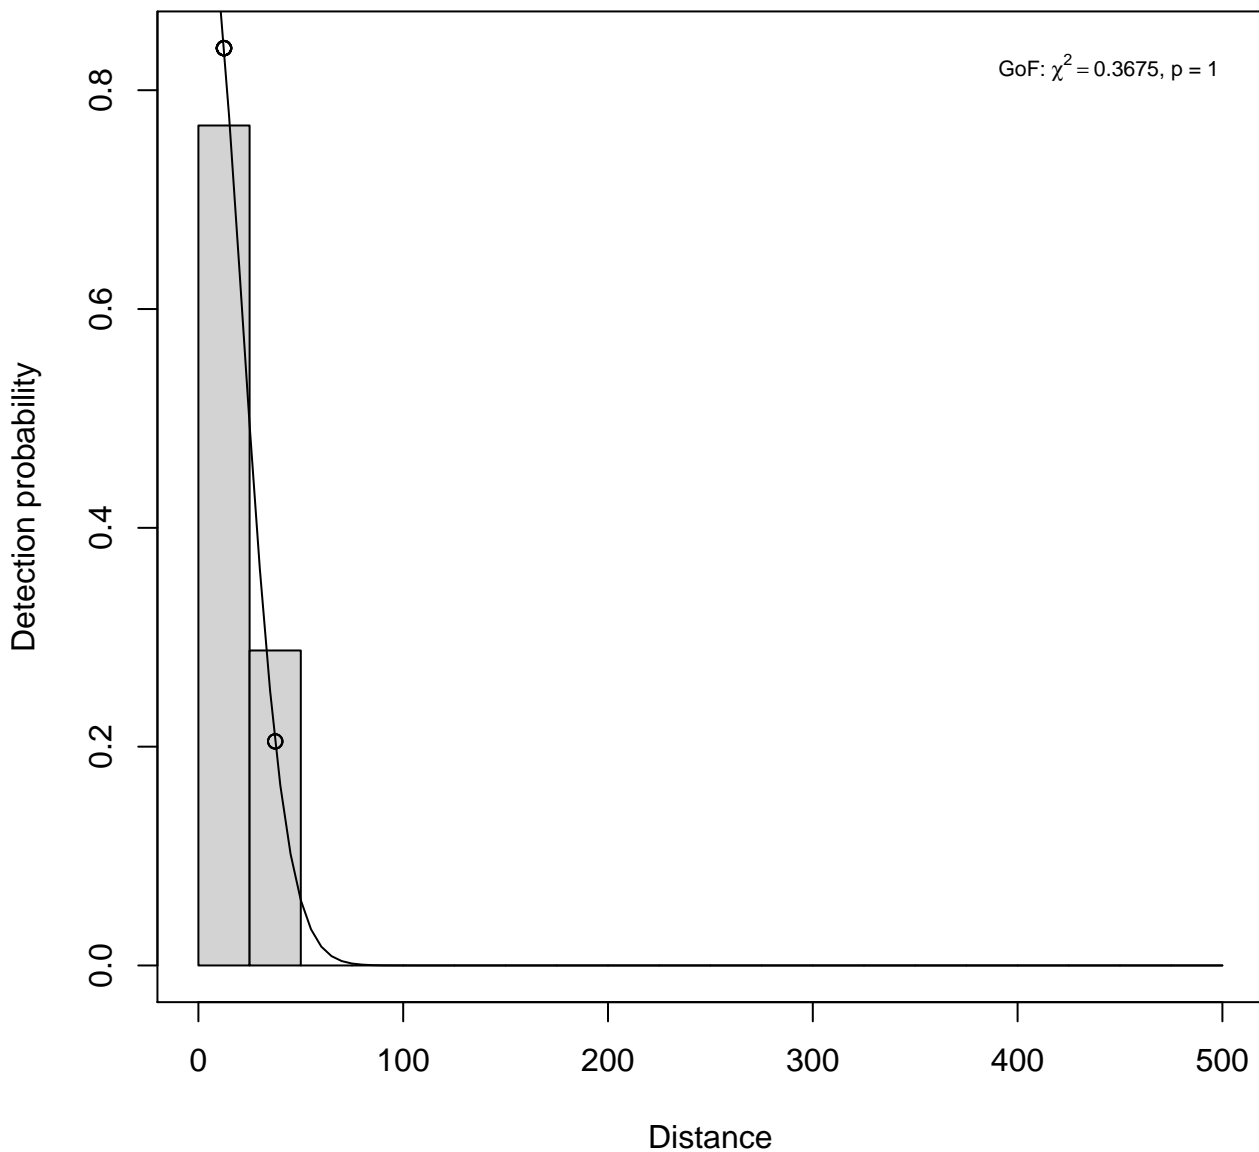

GoF:  $\chi^2 = \text{NA}$ , p = NA

Forpus passerinus – Guajira–Barranquilla xeric scrub – Colombia (N = 11, key function = hn)



Supplement: s1 [file s1]
