# Supplementary material
Source: MDPI journal article supplement (https://www.mdpi.com/1424-2818/13/7/300)

# **Cyanoliseus patagonus – Humid Pampas – Argentina**

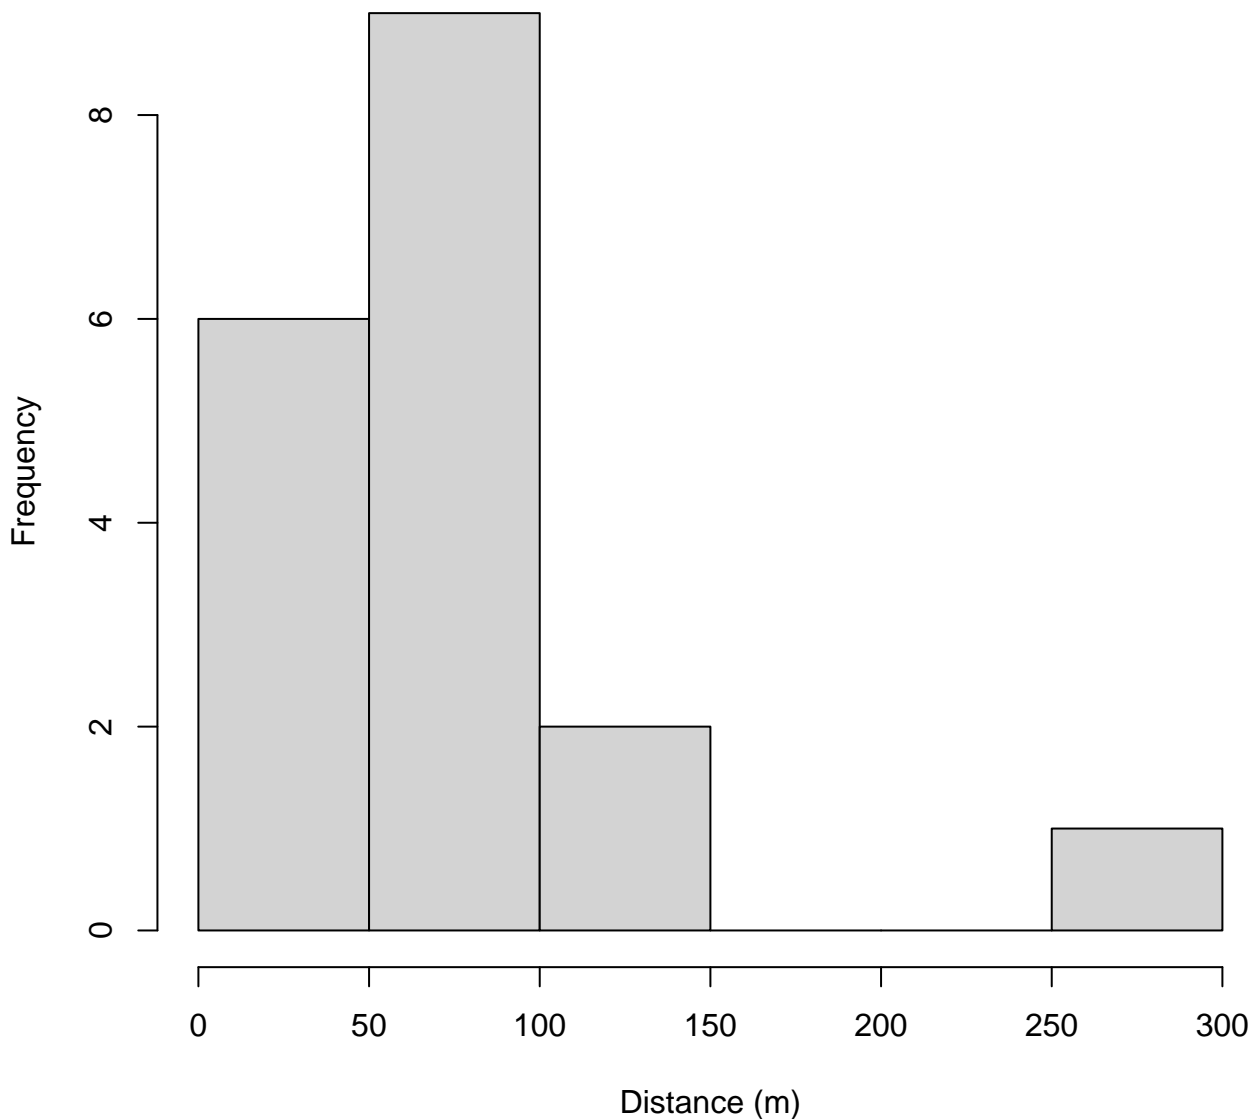

# Cyanoliseus patagonus – Humid Pampas – Argentina

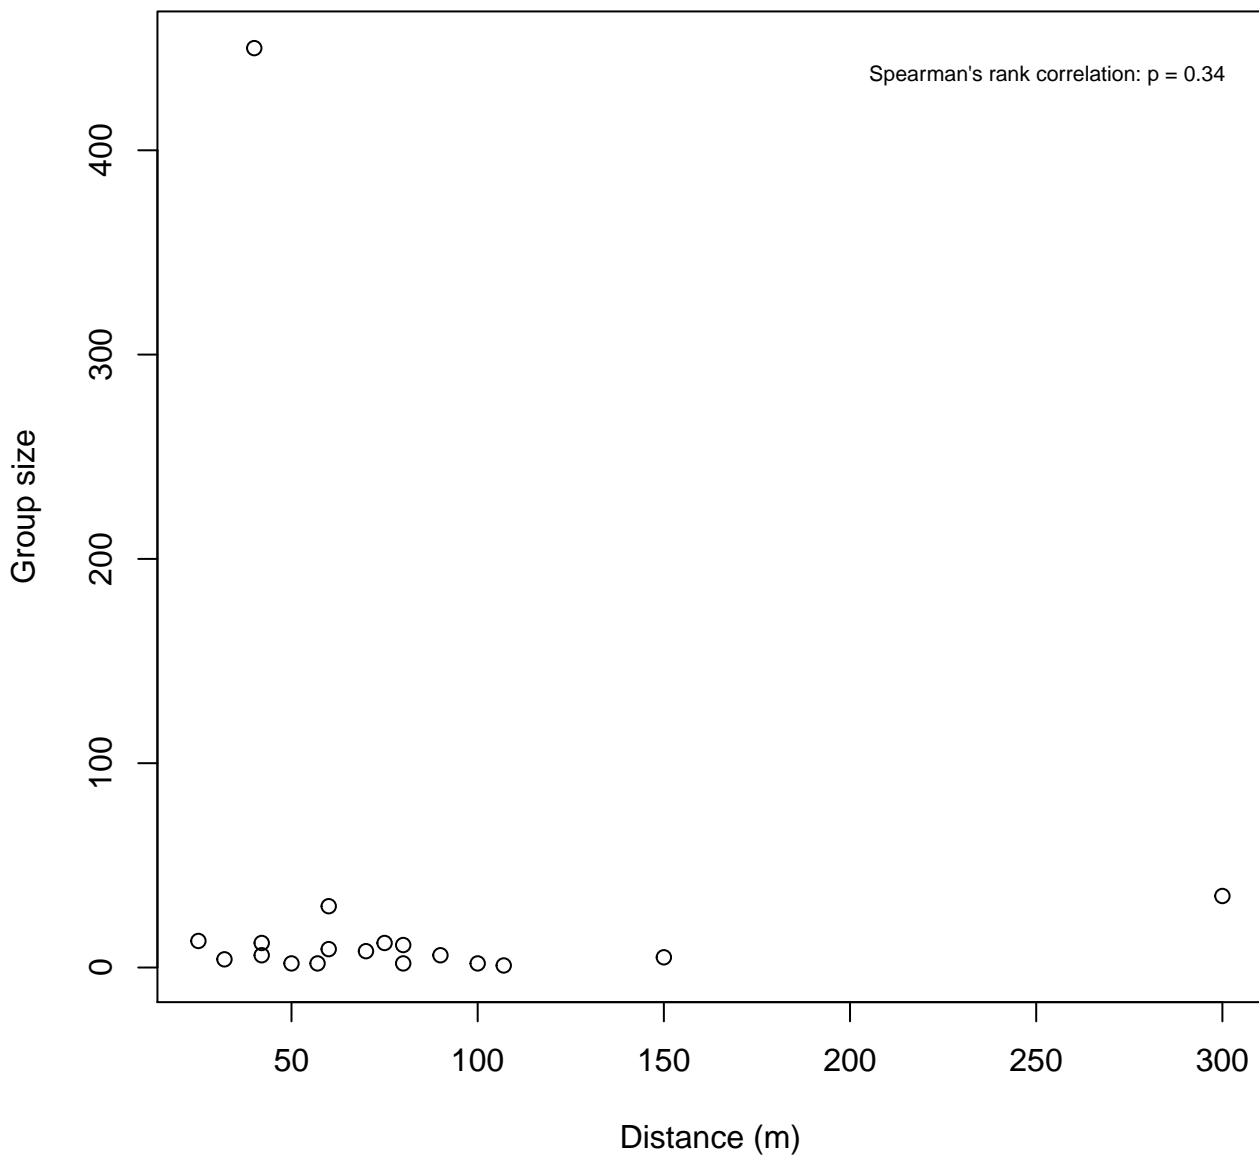

Cyanoliseus patagonus – Humid Pampas – Argentina (N = 18, key function = hr)

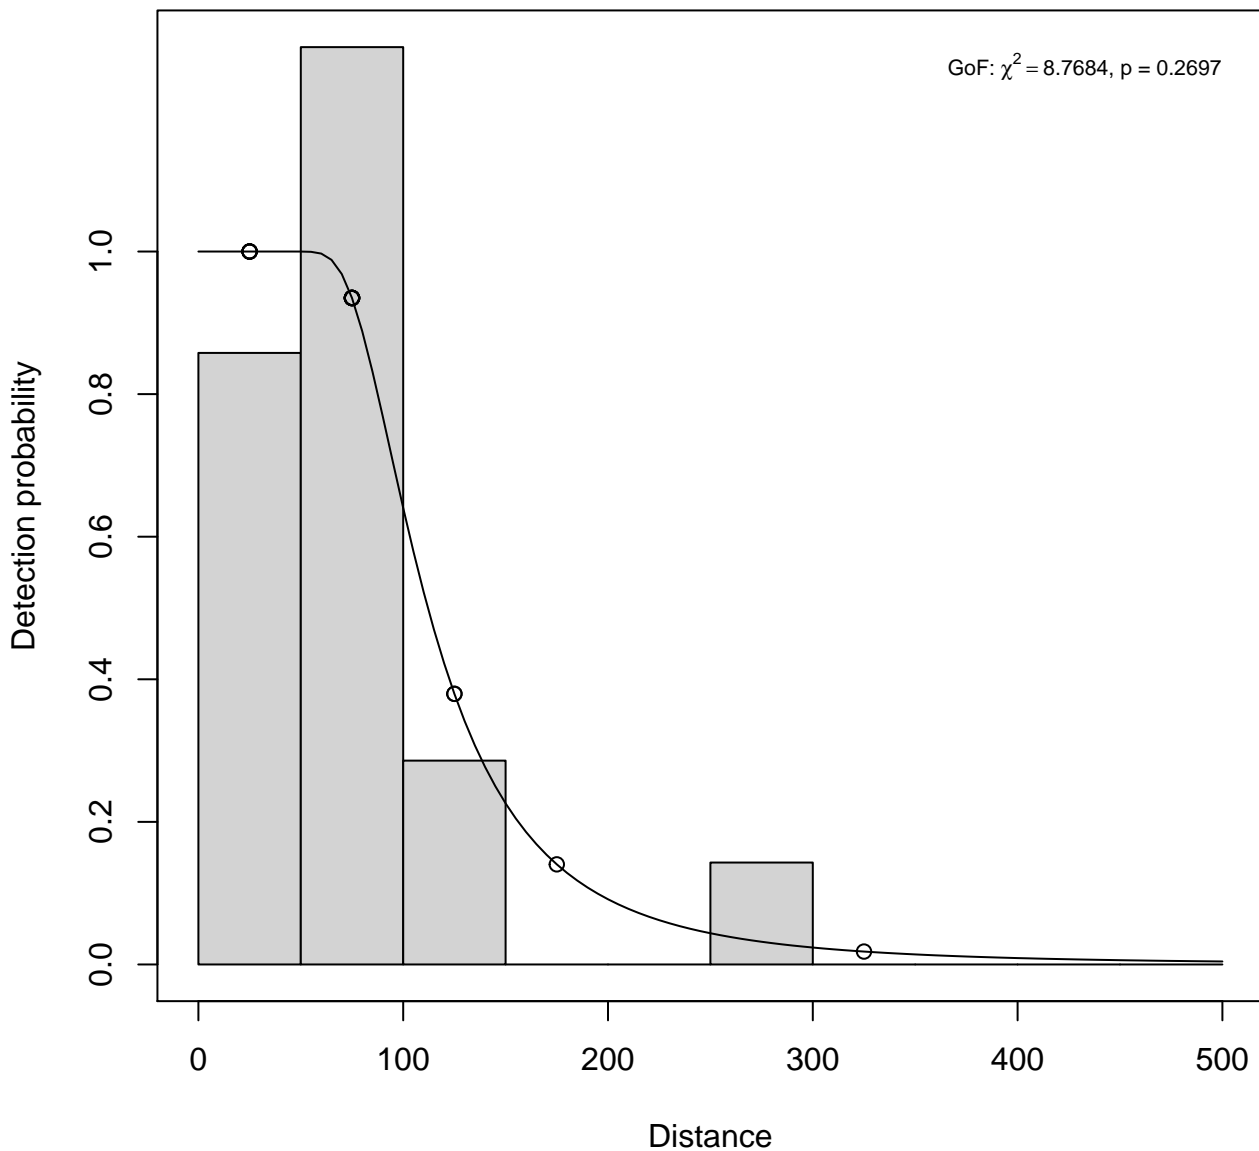

Cyanoliseus patagonus – Humid Pampas – Argentina (N = 18, key function = hn)

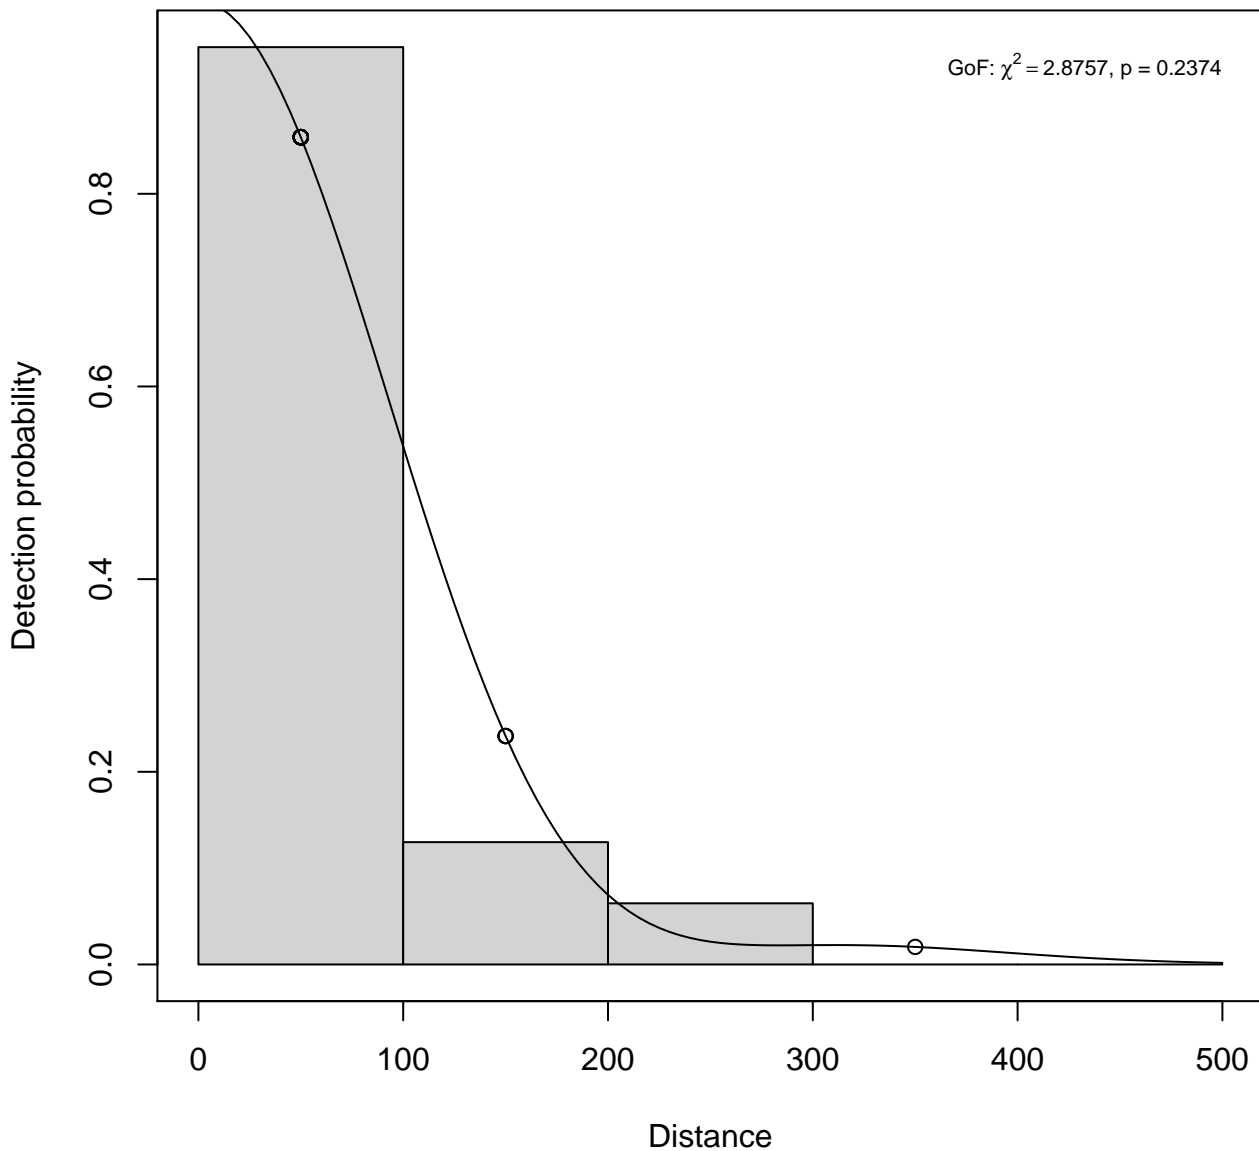

Cyanoliseus patagonus – Humid Pampas – Argentina (N = 18, key function = hr)

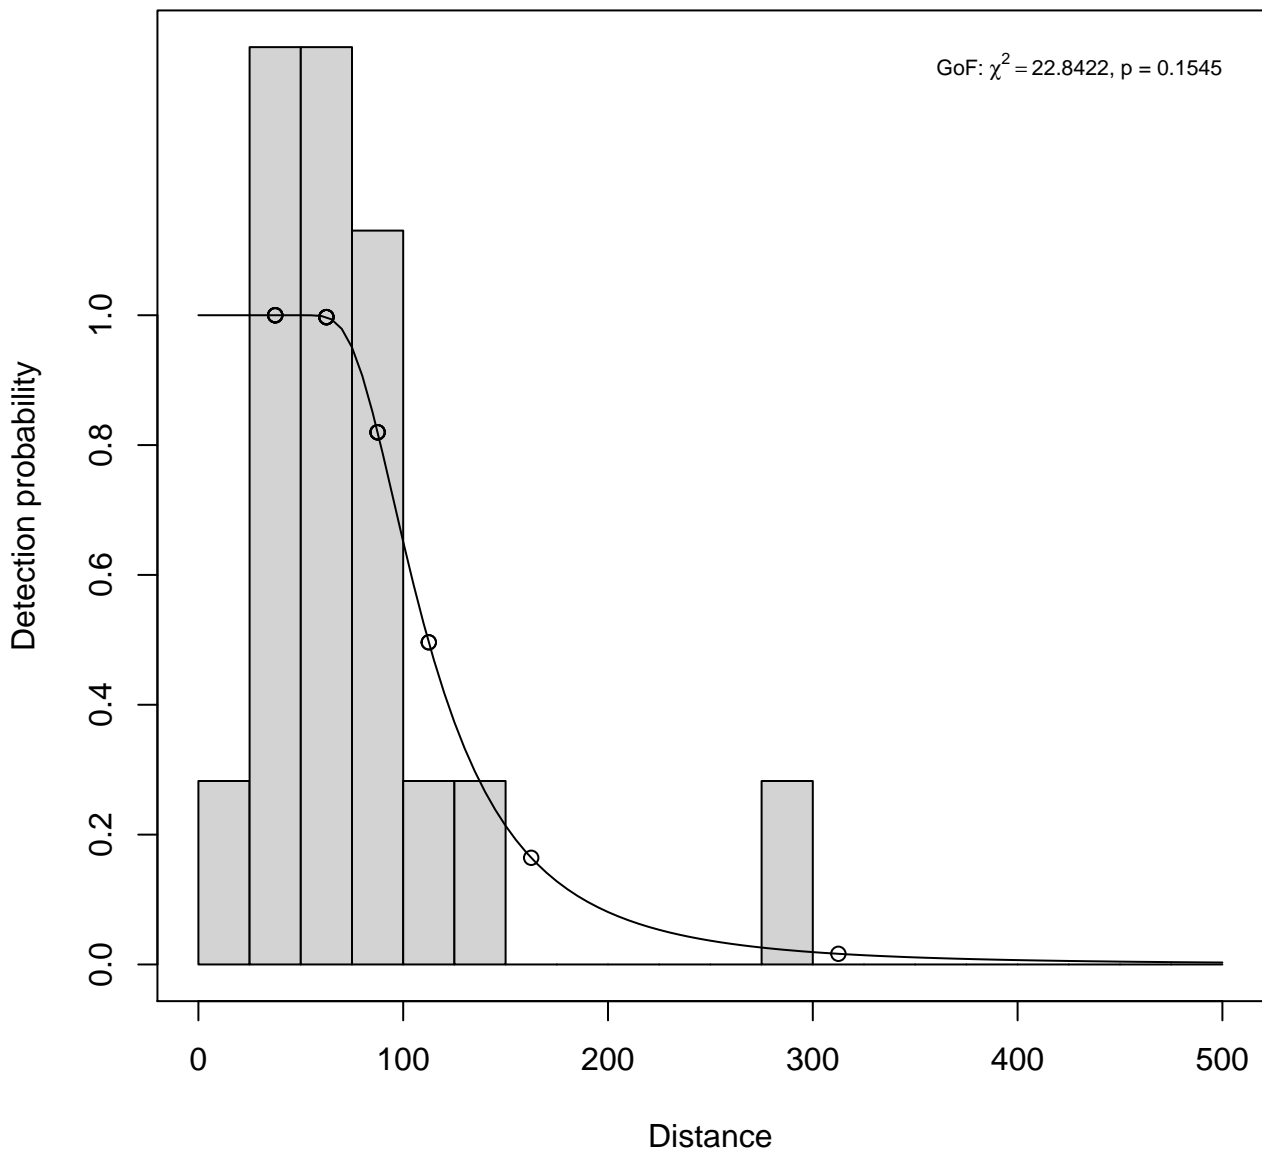

Supplement: s1 [file s1]
