# Supplementary material
Source: MDPI journal article supplement (https://www.mdpi.com/1424-2818/13/7/300)

# **Ara macao – Isthmian–Pacific moist forests – Costa Rica**

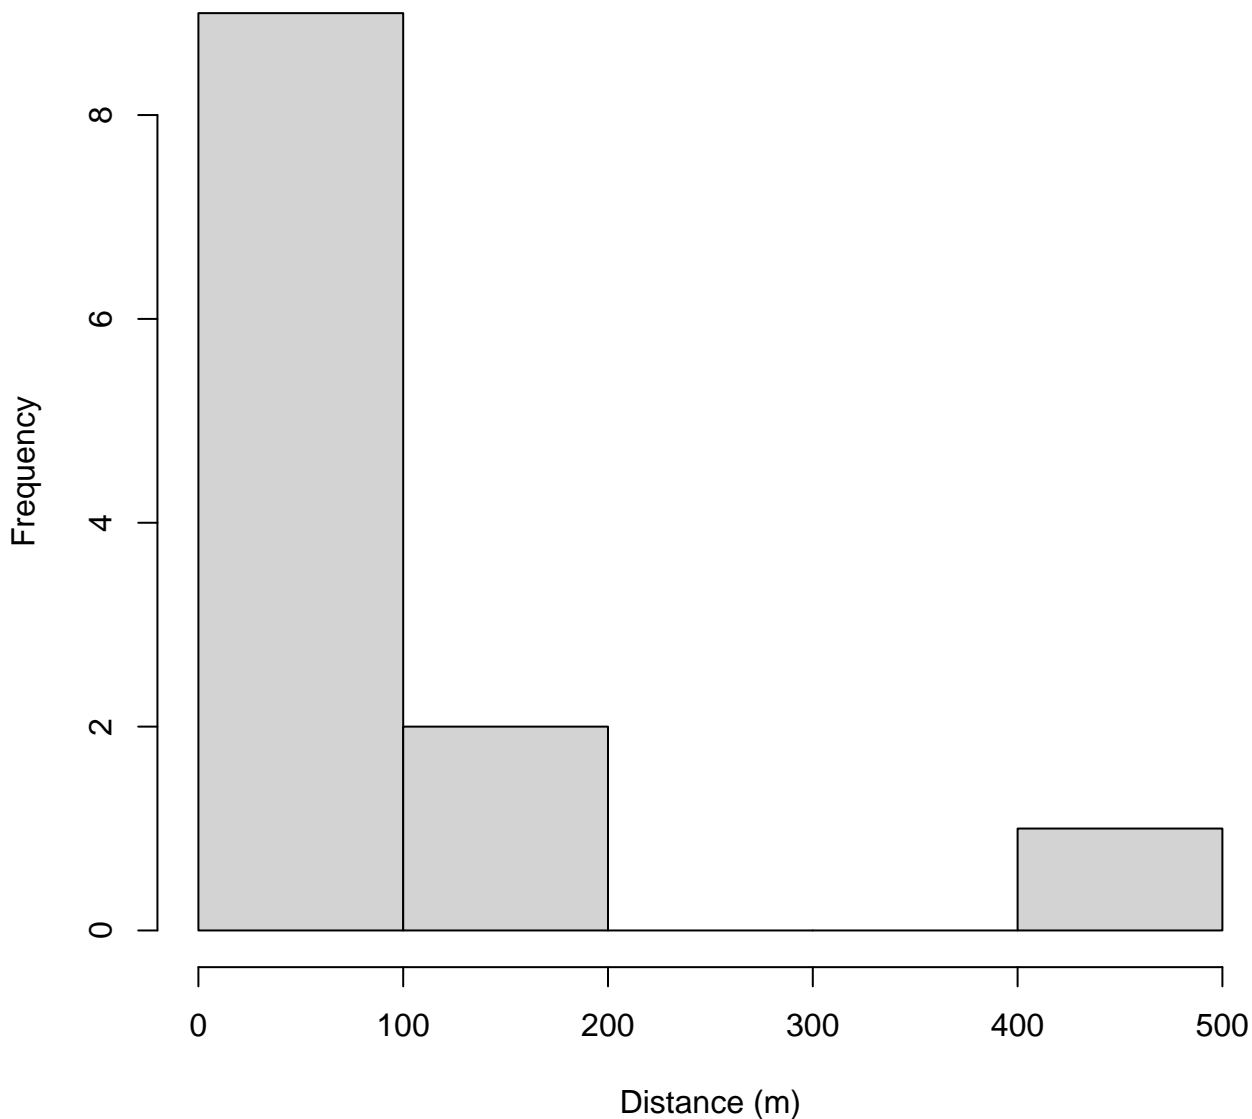

# Ara macao – Isthmian–Pacific moist forests – Costa Rica

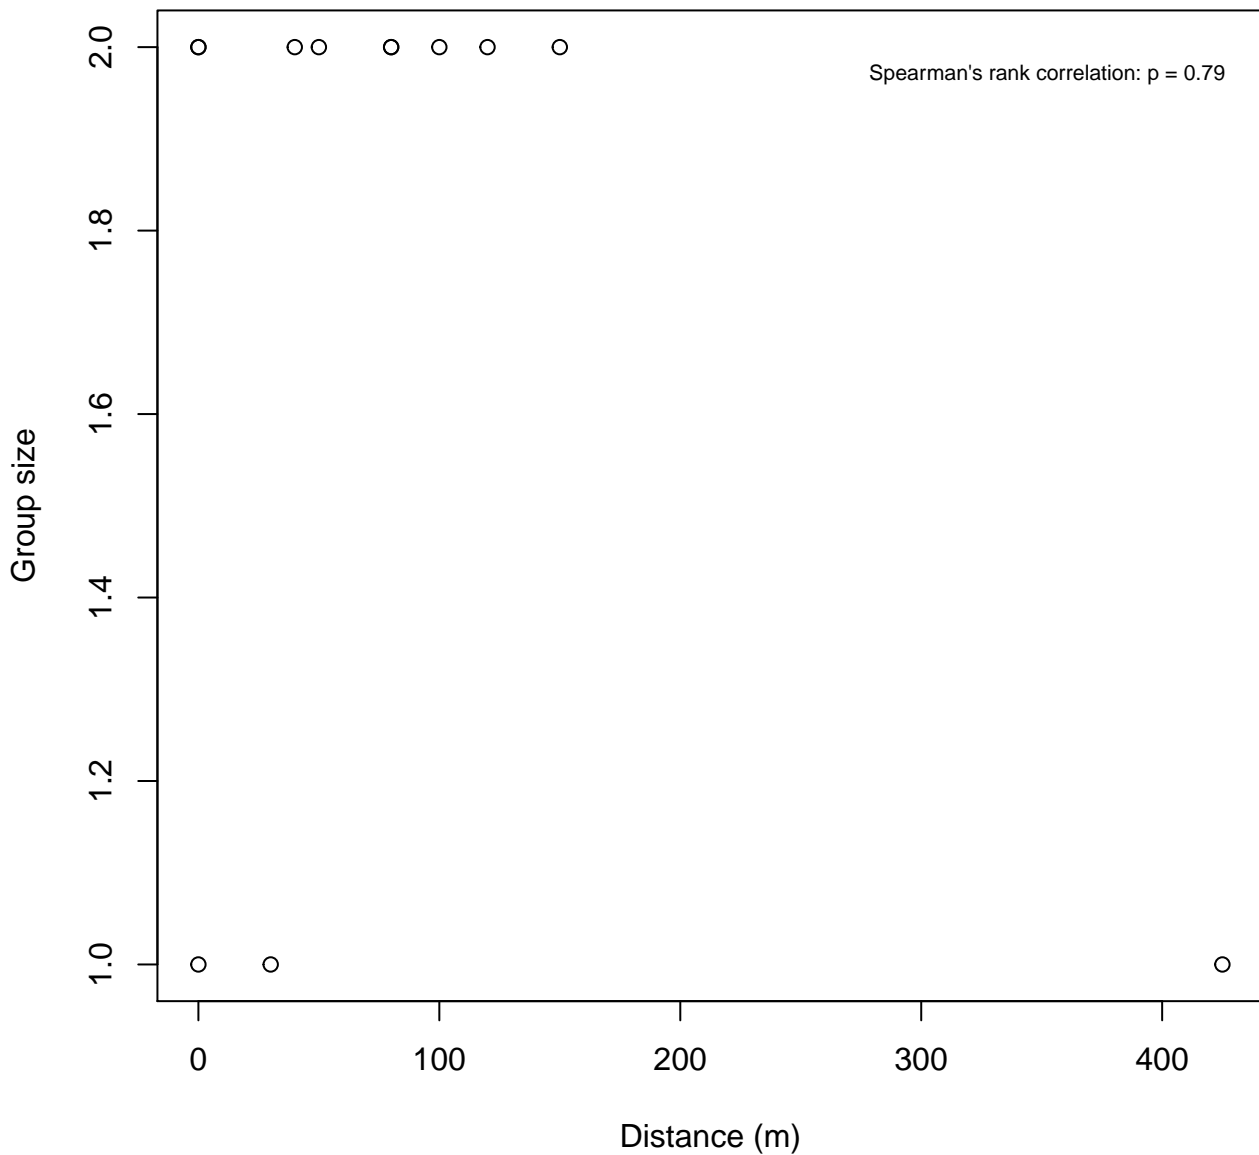

Ara macao – Isthmian–Pacific moist forests – Costa Rica (N = 12, key function = hn)

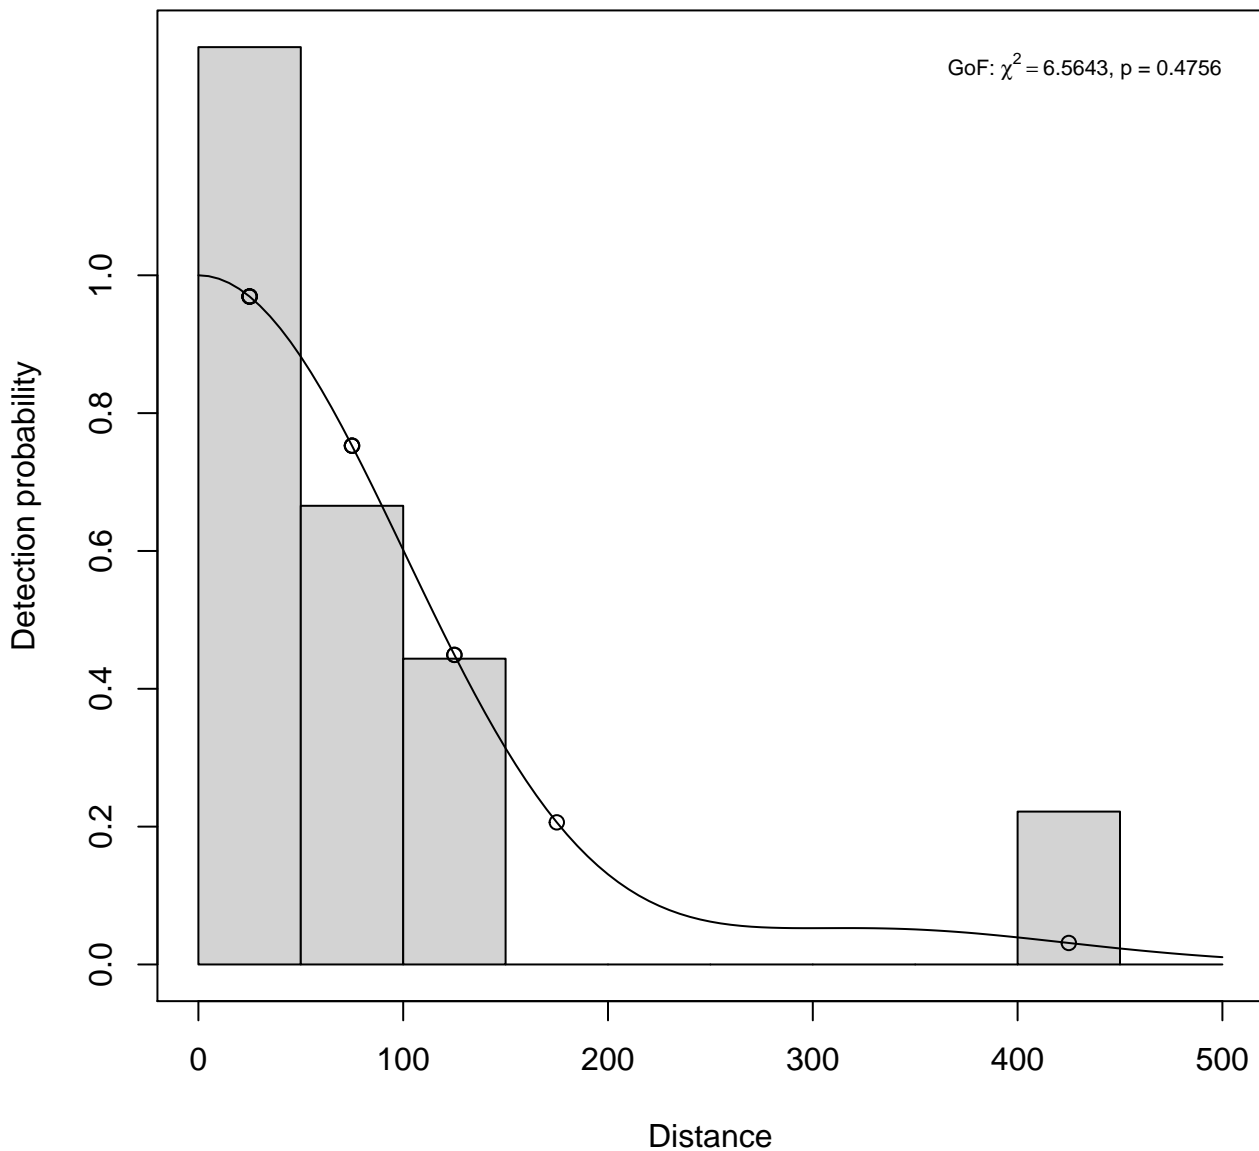

Ara macao – Isthmian–Pacific moist forests – Costa Rica (N = 12, key function = hn)

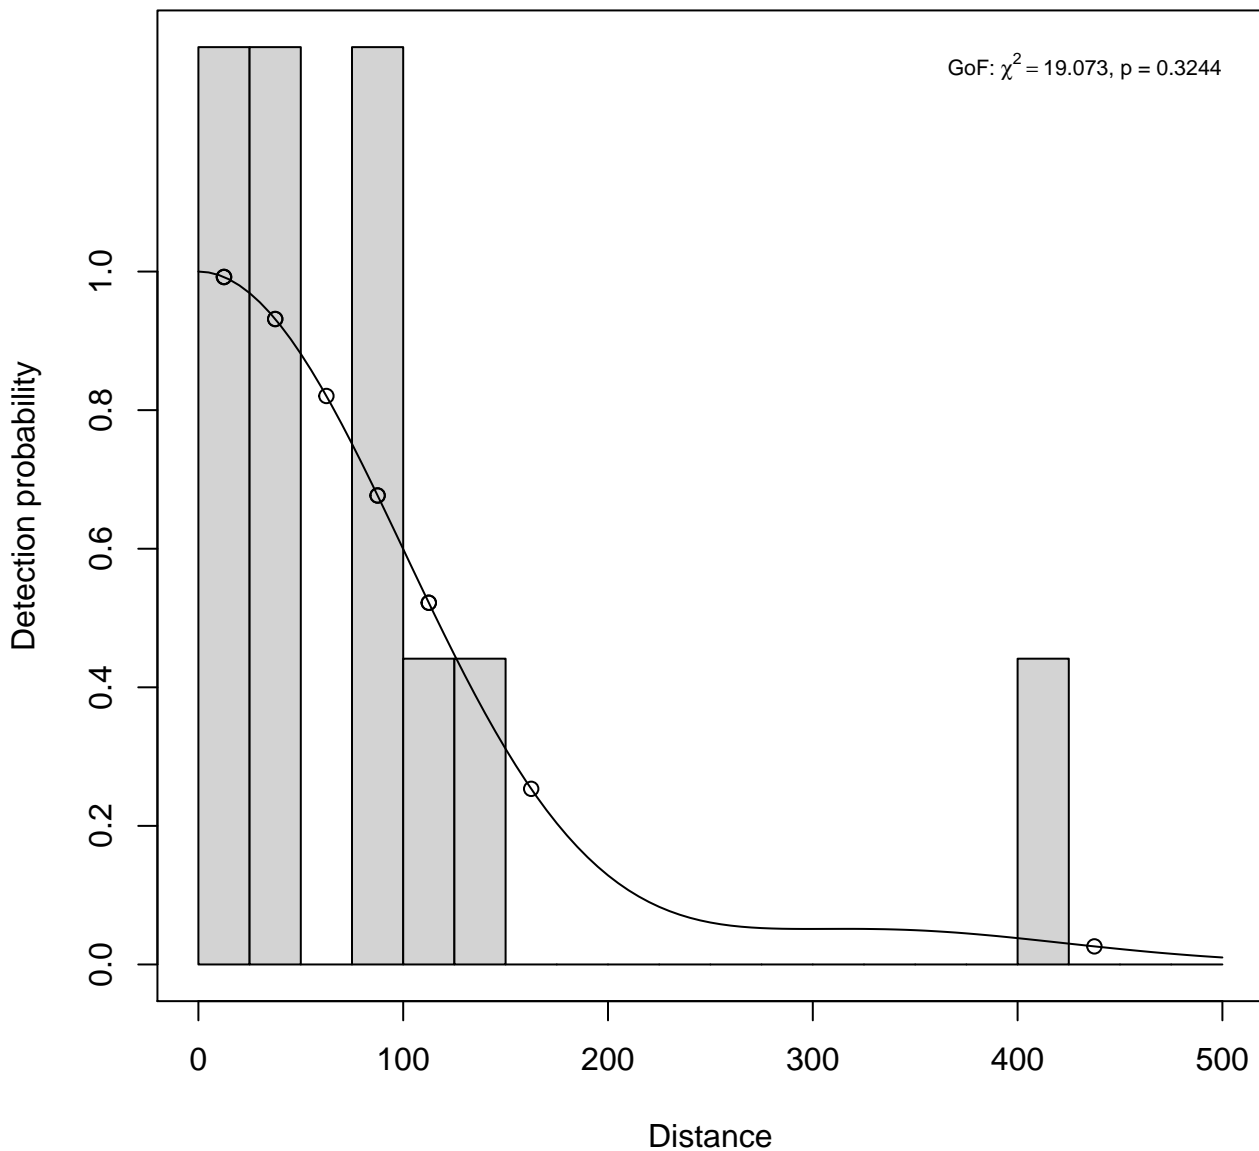

Ara macao – Isthmian–Pacific moist forests – Costa Rica (N = 12, key function = hn)

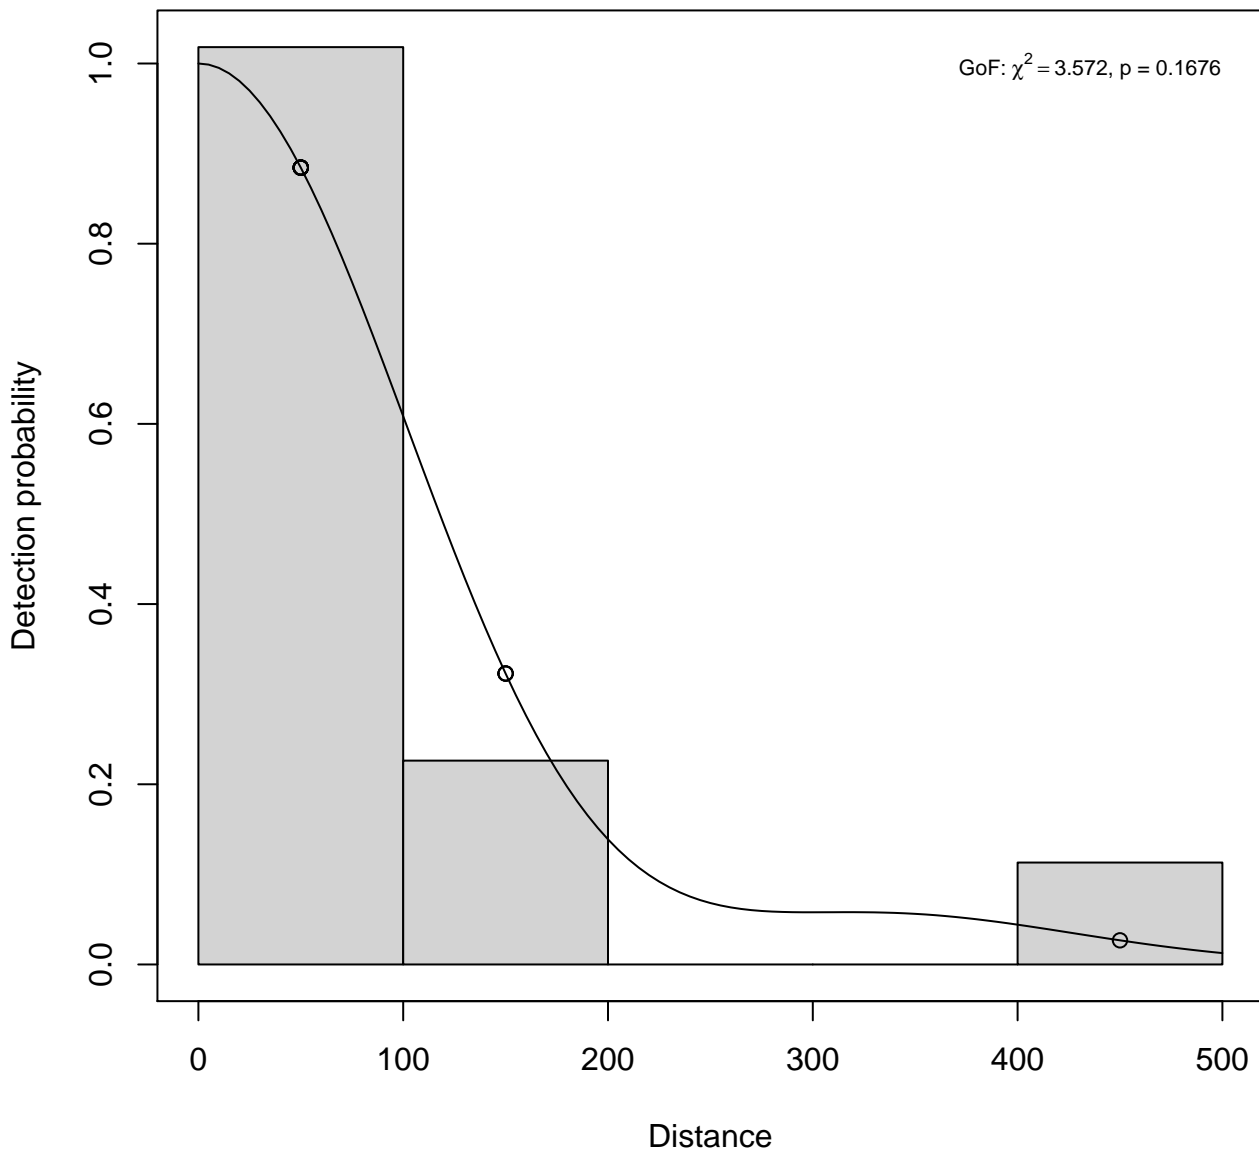

Supplement: s1 [file s1]
